# Supplementary material for: Spatially resolved transcriptomics reveals gene signatures underlying the vulnerability of human middle temporal gyrus in Alzheimer's disease
Source: Research Square preprint supplement (doi:10.21203/rs.3.rs-855234/v1), 2021-09-10
Supplement: Supplementary file 5 [file 8c55a212f6ebf421e6fb3374.docx]

**Supplementary Table 1. Description of human post-mortem cases.**

| Case ID | Ethnicity | Sex | Age  (yr) | PMI  (hr) | AD | Other NDs | MMSE before death | Plaque density | Braak stage | CERAD neuritic plaque density | ApoE | RIN-1 | RIN-2 | Section  type | Use | Source |
| --- | --- | --- | --- | --- | --- | --- | --- | --- | --- | --- | --- | --- | --- | --- | --- | --- |
| CT-1 | White | M | 82 | 3.33 | No | No | 30 | zero | II | Criteria not met | 3/3 | 8.3 | 6.6 | FR | Visium,  RNAscope | BH |
| CT-2 | White | M | 72 | 4.60 | No | No | 29 | zero | I | Criteria not met | 3/3 | 9.4 | 6.0 | FR | Visium | BH |
| AD-1 | White | M | 86 | 2.16 | Yes | No | 19 | Frequent | IV | definite AD | 3/3 | 9.2 | 6.1 | FR | Visium | BH |
| AD-2 | White | M | 89 | 12.67 | Yes | No | 25 | Frequent | III | definite AD | n/a | n/a | 6.0 | FR | Visium,  RNAscope | NYBB |
| CT-3 | White | M | 79 | 4.30 | No | No | 28 | zero | II | Criteria not met | 2/3 | 9 | 6.5 | FR | RNAscope | BH |
| CT-4 | White | F | 53 | 3.95 | No | No | n/a | zero | II | Criteria not met | 3/3 | 9.4 | 6.4 | FR | RNAscope | BH |
| CT-5 | White | M | 82 | 2.07 | No | No | 29 | sparse | I | Criteria not met | 2/3 | 9.5 | 6.5 | FR | RNAscope | BH |
| AD-3 | White | F | 98 | 3.00 | Yes | No | 22 | Frequent | IV | definite AD | 3/3 | 9.3 | 7.4 | FR | RNAscope | BH |
| AD-4 | White | M | 92 | 3.58 | Yes | No | 22 | Frequent | IV | definite AD | 3/3 | 8.2 | 6.0 | FR | RNAscope | BH |
| AD-5 | White | F | 97 | 5.00 | Yes | No | 27 | Frequent | IV | definite AD | 3/3 | 9.2 | 6.4 | FR | RNAscope | BH |

CT, Control; AD, Alzheimer’s disease; M, male; F, female; PMI, postmortem interval; NDs: neurodegenerative diseases including Parkinson’s disease, Dementia with Lewy bodies, Vascular dementia, Progressive supranuclear palsy, Hippocampal sclerosis, Dementia lacking distinctive histology, Motor neuron disease, Corticobasal degeneration, Pick’s disease, Huntington’s disease, Multiple system atrophy, Argyrophilic grain disease, Cerebral white matter rarefaction, Frontotemporal lobar degeneration with TDP-43, and Multiple sclerosis; MMSE, Mini-Mental State Exam; CERAD, Consortium to Establish a Registry for AD; RIN-1, original RNA integrity number provided by the Brain Bank using the Qiagen RNeasy Plus mini kit; RIN-2, actual RNA integrity number measured at OSU using the extraction method of Trizol reagent; FR, frozen section; BH, Banner Sun Health Research Institute; NYBB, New York Brain Bank.
