# Supplementary material for: Spatially resolved transcriptomics reveals gene signatures underlying the vulnerability of human middle temporal gyrus in Alzheimer's disease
Source: Research Square preprint supplement (doi:10.21203/rs.3.rs-855234/v1), 2021-09-10
Supplement: Supplementary file 9 [file c9e24421830487b679713ac4.xlsx]

## Sheet: Aβ_up_level 3
DEGs in this data sheet were identified by comparing genes in Aβ positive spots with genes in its level 3 spots, which are 245 µm away from Aβ positive spots. All the DEGs in this data sheet were significantly upregulated in Aβ positive spots than in level 3 spots. The pathway analysis was performed as previously described. Top pathways of interest with significance (adjust p value is less than 0…
		GO enrichment analysis									KEGG pathway analysis									Reactome analysis
Gene	sample	ID	Description	GeneRatio	BgRatio	pvalue	p.adjust	qvalue	geneID	Count	ID	Description	GeneRatio	BgRatio	pvalue	p.adjust	qvalue	geneID	Count	ID	Description	GeneRatio	BgRatio	pvalue	p.adjust	qvalue	geneID	Count
RPS6	Aβ_up	GO:0022604	regulation of cell morphogenesis	19/181	499/18866	3.50508e-07	0.00103084	0.000938254	MYH9/EFNB3/TANC2/ISLR2/TIAM1/CFDP1/CHN1/HEXB/PPP3CA/NTRK2/MYCBP2/CDC42SE1/SPP1/S100B/RDX/MYO9A/CFAP410/SEMA4F/SKIL	19	hsa04371	Apelin signaling pathway	7/87	137/8111	0.000638511	0.132172	0.122325	RPS6/MEF2D/GABARAPL1/SPP1/MRAS/PRKAA1/PRKCE	7	R-HSA-156827	L13a-mediated translational silencing of Ceruloplasmin expression	8/122	111/10704	3.74937e-05	0.0108658	0.00971554	RPS6/EIF3I/RPL39/RPL7/UBA52/EIF4H/RPS26/RPL30	8
AGO3	Aβ_up	GO:0070972	protein localization to endoplasmic reticulum	9/181	152/18866	1.63169e-05	0.0130677	0.011894	RPS6/ANKRD13C/KDELR2/RPL39/RPL7/UBA52/RPS26/RAB3GAP1/RPL30	9	hsa00010	Glycolysis / Gluconeogenesis	4/87	67/8111	0.00566273	0.329225	0.304699	ENO2/G6PC3/TPI1/GPI/GPI	4	R-HSA-72706	GTP hydrolysis and joining of the 60S ribosomal subunit	8/122	112/10704	3.99971e-05	0.0108658	0.00971554	RPS6/EIF3I/RPL39/RPL7/UBA52/EIF4H/RPS26/RPL30	8
MBP	Aβ_up	GO:0006413	translational initiation	10/181	192/18866	1.69082e-05	0.0130677	0.011894	RPS6/EIF3I/NCK1/RPL39/RPL7/CDC123/UBA52/EIF4H/RPS26/RPL30	10	hsa04150	mTOR signaling pathway	6/87	155/8111	0.00625432	0.329225	0.304699	RPS6/ATP6V1G1/RPS6KA3/PRKAA1/ATP6V1A/SOS1	6	R-HSA-72613	Eukaryotic Translation Initiation	8/122	119/10704	6.17375e-05	0.0108658	0.00971554	RPS6/EIF3I/RPL39/RPL7/UBA52/EIF4H/RPS26/RPL30	8
PLEKHA1	Aβ_up	GO:0010977	negative regulation of neuron projection development	9/181	154/18866	1.81136e-05	0.0130677	0.011894	EFNB3/NR2F1/PPP3CA/VIM/DPYSL3/SPP1/STMN2/SEMA4F/EFNB2	9	hsa03010	Ribosome	6/87	158/8111	0.00685352	0.329225	0.304699	RPS6/RPL39/RPL7/UBA52/RPS26/RPL30	6	R-HSA-72737	Cap-dependent Translation Initiation	8/122	119/10704	6.17375e-05	0.0108658	0.00971554	RPS6/EIF3I/RPL39/RPL7/UBA52/EIF4H/RPS26/RPL30	8
MYH9	Aβ_up	GO:0007519	skeletal muscle tissue development	9/181	158/18866	2.22165e-05	0.0130677	0.011894	RB1/HDAC9/MEF2D/NF1/PPP3CA/NUPR1/S100B/PRKAA1/CCNT2	9	hsa04810	Regulation of actin cytoskeleton	7/87	218/8111	0.00871733	0.329225	0.304699	MYH9/TIAM1/CYFIP2/MRAS/RDX/SOS1/GIT1	7	R-HSA-72689	Formation of a pool of free 40S subunits	7/122	101/10704	0.000149109	0.0209945	0.018772	RPS6/EIF3I/RPL39/RPL7/UBA52/RPS26/RPL30	7
NR2F6	Aβ_up	GO:0060538	skeletal muscle organ development	9/181	168/18866	3.60661e-05	0.0174382	0.0158719	RB1/HDAC9/MEF2D/NF1/PPP3CA/NUPR1/S100B/PRKAA1/CCNT2	9	hsa00983	Drug metabolism - other enzymes	4/87	80/8111	0.0105208	0.329225	0.304699	CMPK1/IMPDH2/HPRT1/RRM2B	4	R-HSA-156902	Peptide chain elongation	6/122	89/10704	0.000520811	0.0421366	0.037676	RPS6/RPL39/RPL7/UBA52/RPS26/RPL30	6
SERF2	Aβ_up	GO:0042552	myelination	8/181	137/18866	5.36328e-05	0.0174382	0.0158719	MBP/ZPR1/NF1/HEXB/NTRK2/RARB/S100B/CTSC	8	hsa00230	Purine metabolism	5/87	130/8111	0.012697	0.329225	0.304699	IMPDH2/HPRT1/RRM2B/AMPD3/NTPCR	5	R-HSA-192823	Viral mRNA Translation	6/122	89/10704	0.000520811	0.0421366	0.037676	RPS6/RPL39/RPL7/UBA52/RPS26/RPL30	6
CMPK1	Aβ_up	GO:0007272	ensheathment of neurons	8/181	139/18866	5.94372e-05	0.0174382	0.0158719	MBP/ZPR1/NF1/HEXB/NTRK2/RARB/S100B/CTSC	8	hsa04068	FoxO signaling pathway	5/87	131/8111	0.013092	0.329225	0.304699	G6PC3/SOD2/GABARAPL1/PRKAA1/SOS1	5	R-HSA-70263	Gluconeogenesis	4/122	34/10704	0.000571842	0.0421366	0.037676	ENO2/G6PC3/TPI1/GPI	4
SH3PXD2A	Aβ_up	GO:0008366	axon ensheathment	8/181	139/18866	5.94372e-05	0.0174382	0.0158719	MBP/ZPR1/NF1/HEXB/NTRK2/RARB/S100B/CTSC	8	hsa00520	Amino sugar and nucleotide sugar metabolism	3/87	48/8111	0.0145665	0.329225	0.304699	HEXB/GMPPA/GPI/GPI	3	R-HSA-156842	Eukaryotic Translation Elongation	6/122	93/10704	0.000658385	0.0421366	0.037676	RPS6/RPL39/RPL7/UBA52/RPS26/RPL30	6
DDR1	Aβ_up	GO:0051961	negative regulation of nervous system development	12/181	319/18866	6.18522e-05	0.0174382	0.0158719	EFNB3/NR2F1/NF1/PPP3CA/SOX2/VIM/DPYSL3/SPP1/CTSC/STMN2/SEMA4F/EFNB2	12	hsa05110	Vibrio cholerae infection	3/87	50/8111	0.0162566	0.329225	0.304699	ATP6V1G1/KDELR2/ATP6V1A	3	R-HSA-2408557	Selenocysteine synthesis	6/122	93/10704	0.000658385	0.0421366	0.037676	RPS6/RPL39/RPL7/UBA52/RPS26/RPL30	6
FAM98B	Aβ_up	GO:0045665	negative regulation of neuron differentiation	10/181	225/18866	6.52226e-05	0.0174382	0.0158719	EFNB3/NR2F1/PPP3CA/SOX2/VIM/DPYSL3/SPP1/STMN2/SEMA4F/EFNB2	10	hsa05323	Rheumatoid arthritis	4/87	93/8111	0.0174951	0.329225	0.304699	ATP6V1G1/HLA-DPB1/HLA-DPB1/HLA-DPB1/HLA-DPB1/HLA-DPB1/HLA-DPB1/HLA-DPB1/HLA-DPB1/HLA-DRB1/HLA-DRB1/HLA-DRB1/HLA-DRB1/HLA-DRB1/HLA-DRB1/ATP6V1A	4	R-HSA-72764	Eukaryotic Translation Termination	6/122	93/10704	0.000658385	0.0421366	0.037676	RPS6/RPL39/RPL7/UBA52/RPS26/RPL30	6
ATP6V1G1	Aβ_up	GO:0050770	regulation of axonogenesis	9/181	186/18866	7.94883e-05	0.0174857	0.0159151	EFNB3/ISLR2/TIAM1/CHN1/NTRK2/MYCBP2/SPP1/SEMA4F/SKIL	9	hsa05205	Proteoglycans in cancer	6/87	205/8111	0.0224852	0.38444	0.3558	RPS6/TIAM1/CD63/MRAS/RDX/SOS1	6	R-HSA-975956	Nonsense Mediated Decay (NMD) independent of the Exon Junction Complex (EJC)	6/122	95/10704	0.000736958	0.0432349	0.038658	RPS6/RPL39/RPL7/UBA52/RPS26/RPL30	6
SLC25A38	Aβ_up	GO:0031345	negative regulation of cell projection organization	9/181	188/18866	8.6284e-05	0.0174857	0.0159151	EFNB3/NR2F1/PPP3CA/VIM/DPYSL3/SPP1/STMN2/SEMA4F/EFNB2	9	hsa04931	Insulin resistance	4/87	108/8111	0.0284796	0.38444	0.3558	RPS6KA3/G6PC3/PRKAA1/PRKCE	4	R-HSA-376176	Signaling by ROBO receptors	9/122	218/10704	0.00085163	0.046119	0.0412368	RPS6/PSMB5/NCK1/RPL39/RPL7/UBA52/RPS26/SOS1/RPL30	9
EFNB3	Aβ_up	GO:0006613	cotranslational protein targeting to membrane	7/181	109/18866	8.71358e-05	0.0174857	0.0159151	RPS6/ARL6IP1/RPL39/RPL7/UBA52/RPS26/RPL30	7	hsa04213	Longevity regulating pathway - multiple species	3/87	62/8111	0.0286295	0.38444	0.3558	SOD2/CRYAB/PRKAA1	3	R-HSA-9633012	Response of EIF2AK4 (GCN2) to amino acid deficiency	6/122	101/10704	0.00101679	0.0511298	0.0457171	RPS6/RPL39/RPL7/UBA52/RPS26/RPL30	6
ZBTB38	Aβ_up	GO:0001654	eye development	13/181	384/18866	8.91823e-05	0.0174857	0.0159151	RAB11FIP4/IMPDH2/IFT172/NF1/SOX2/CST3/NTRK2/VIM/CRYAB/RARB/RAB3GAP1/SKIL/SOS1	13	hsa04966	Collecting duct acid secretion	2/87	27/8111	0.0335601	0.38444	0.3558	ATP6V1G1/ATP6V1A	2	R-HSA-6791226	Major pathway of rRNA processing in the nucleolus and cytosol	8/122	184/10704	0.00118976	0.0539019	0.0481958	RPS6/PES1/RPL39/RPL7/UBA52/RPS26/MTREX/RPL30	8
TANC2	Aβ_up	GO:0150063	visual system development	13/181	388/18866	9.89244e-05	0.0175594	0.0159822	RAB11FIP4/IMPDH2/IFT172/NF1/SOX2/CST3/NTRK2/VIM/CRYAB/RARB/RAB3GAP1/SKIL/SOS1	13	hsa01200	Carbon metabolism	4/87	115/8111	0.034745	0.38444	0.3558	ENO2/TPI1/PCCA/GPI/GPI	4	R-HSA-3928664	Ephrin signaling	3/122	19/10704	0.00122504	0.0539019	0.0481958	EFNB3/GIT1/EFNB2	3
ANKRD13C	Aβ_up	GO:0014706	striated muscle tissue development	13/181	389/18866	0.000101499	0.0175594	0.0159822	NDRG4/RB1/HDAC9/MEF2D/NF1/PPP3CA/NUPR1/RARB/S100B/PRKAA1/MESP1/EFNB2/CCNT2	13	hsa04530	Tight junction	5/87	169/8111	0.0348022	0.38444	0.3558	MYH9/TIAM1/RDX/PRKAA1/PRKCE	5	R-HSA-8868773	rRNA processing in the nucleus and cytosol	8/122	194/10704	0.00166697	0.0665251	0.0594827	RPS6/PES1/RPL39/RPL7/UBA52/RPS26/MTREX/RPL30	8
CPSF7	Aβ_up	GO:0048880	sensory system development	13/181	394/18866	0.000115262	0.0188325	0.017141	RAB11FIP4/IMPDH2/IFT172/NF1/SOX2/CST3/NTRK2/VIM/CRYAB/RARB/RAB3GAP1/SKIL/SOS1	13	hsa04137	Mitophagy - animal	3/87	68/8111	0.0362509	0.38444	0.3558	GABARAPL1/MRAS/UBA52	3	R-HSA-1799339	SRP-dependent cotranslational protein targeting to membrane	6/122	112/10704	0.00173449	0.0665251	0.0594827	RPS6/RPL39/RPL7/UBA52/RPS26/RPL30	6
LSM3	Aβ_up	GO:0050768	negative regulation of neurogenesis	11/181	295/18866	0.000135668	0.021	0.0191138	EFNB3/NR2F1/NF1/PPP3CA/SOX2/VIM/DPYSL3/SPP1/STMN2/SEMA4F/EFNB2	11	hsa04920	Adipocytokine signaling pathway	3/87	69/8111	0.037613	0.38444	0.3558	G6PC3/PRKAA1/NPY	3	R-HSA-9613829	Chaperone Mediated Autophagy	3/122	22/10704	0.00189902	0.0665251	0.0594827	GFAP/VIM/UBA52	3
SSBP3	Aβ_up	GO:0060537	muscle tissue development	13/181	409/18866	0.00016666	0.0245074	0.0223061	NDRG4/RB1/HDAC9/MEF2D/NF1/PPP3CA/NUPR1/RARB/S100B/PRKAA1/MESP1/EFNB2/CCNT2	13	hsa05171	Coronavirus disease - COVID-19	6/87	232/8111	0.0379929	0.38444	0.3558	RPS6/RPL39/RPL7/UBA52/RPS26/RPL30	6	R-HSA-927802	Nonsense-Mediated Decay (NMD)	6/122	115/10704	0.00198441	0.0665251	0.0594827	RPS6/RPL39/RPL7/UBA52/RPS26/RPL30	6
FAM120B	Aβ_up	GO:0048013	ephrin receptor signaling pathway	6/181	87/18866	0.000190459	0.026091	0.0237475	EFNB3/TIAM1/CHN1/NCK1/GIT1/EFNB2	6	hsa05120	Epithelial cell signaling in Helicobacter pylori infection	3/87	70/8111	0.0390011	0.38444	0.3558	ATP6V1G1/ATP6V1A/GIT1	3	R-HSA-975957	Nonsense Mediated Decay (NMD) enhanced by the Exon Junction Complex (EJC)	6/122	115/10704	0.00198441	0.0665251	0.0594827	RPS6/RPL39/RPL7/UBA52/RPS26/RPL30	6
SEC14L1	Aβ_up	GO:0072599	establishment of protein localization to endoplasmic reticulum	7/181	124/18866	0.000195172	0.026091	0.0237475	RPS6/RPL39/RPL7/UBA52/RPS26/RAB3GAP1/RPL30	7	hsa05223	Non-small cell lung cancer	3/87	72/8111	0.0418549	0.389306	0.360304	RB1/RARB/SOS1	3	R-HSA-2408522	Selenoamino acid metabolism	6/122	118/10704	0.00226071	0.0699332	0.06253	RPS6/RPL39/RPL7/UBA52/RPS26/RPL30	6
GPR108	Aβ_up	GO:0010769	regulation of cell morphogenesis involved in differentiation	11/181	310/18866	0.00020879	0.0266979	0.0242999	EFNB3/TANC2/ISLR2/TIAM1/CHN1/PPP3CA/NTRK2/MYCBP2/SPP1/SEMA4F/SKIL	11	hsa05310	Asthma	2/87	31/8111	0.0432563	0.389306	0.360304	HLA-DPB1/HLA-DPB1/HLA-DPB1/HLA-DPB1/HLA-DPB1/HLA-DPB1/HLA-DPB1/HLA-DPB1/HLA-DRB1/HLA-DRB1/HLA-DRB1/HLA-DRB1/HLA-DRB1/HLA-DRB1	2	R-HSA-72312	rRNA processing	8/122	204/10704	0.00228475	0.0699332	0.06253	RPS6/PES1/RPL39/RPL7/UBA52/RPS26/MTREX/RPL30	8
ERC2	Aβ_up	GO:0008380	RNA splicing	14/181	487/18866	0.000264051	0.0323572	0.0294509	FAM98B/CPSF7/LSM3/ZPR1/RTRAF/NOVA1/RBM5/IVNS1ABP/WTAP/RPS26/SRRM1/MTREX/IK/SMNDC1	14	hsa04360	Axon guidance	5/87	182/8111	0.0455119	0.39254	0.363297	EFNB3/PPP3CA/NCK1/SEMA4F/EFNB2	5	R-HSA-202403	TCR signaling	6/122	120/10704	0.0024604	0.0721717	0.0645315	PSMB5/HLA-DPB1/NCK1/HLA-DRB1/UBA52/UBE2D2	6
PGRMC1	Aβ_up	GO:0009156	ribonucleoside monophosphate biosynthetic process	4/181	34/18866	0.000303496	0.0357033	0.0324964	CMPK1/IMPDH2/HPRT1/AMPD3	4	hsa00051	Fructose and mannose metabolism	2/87	33/8111	0.048449	0.401158	0.371272	TPI1/GMPPA	2	R-HSA-9006115	Signaling by NTRK2 (TRKB)	3/122	25/10704	0.00276652	0.0779051	0.0696579	TIAM1/NTRK2/SOS1	3
KCNMB4	Aβ_up	GO:0009185	ribonucleoside diphosphate metabolic process	7/181	139/18866	0.000392288	0.0443738	0.0403882	CMPK1/ENO2/NUPR1/TPI1/GPI/PRKAA1/AMPD3	7										R-HSA-2029480	Fcgamma receptor (FCGR) dependent phagocytosis	5/122	86/10704	0.00295708	0.0800687	0.0715925	MYH9/CYFIP2/NCK1/PRKCE/ABI1	5
FCHO1	Aβ_up	GO:0002181	cytoplasmic translation	6/181	103/18866	0.00047532	0.0517383	0.0470913	EIF3I/NCK1/RPL39/EIF4H/RPS26/RPL30	6										R-HSA-5628897	TP53 Regulates Metabolic Genes	5/122	87/10704	0.00310928	0.0810716	0.0724893	AGO3/COX6C/GPI/PRKAA1/RRM2B	5
RAB11FIP4	Aβ_up	GO:0010721	negative regulation of cell development	11/181	343/18866	0.000492579	0.0517383	0.0470913	EFNB3/NR2F1/NF1/PPP3CA/SOX2/VIM/DPYSL3/SPP1/STMN2/SEMA4F/EFNB2	11										R-HSA-9010553	Regulation of expression of SLITs and ROBOs	7/122	171/10704	0.00337665	0.0835514	0.0747065	RPS6/PSMB5/RPL39/RPL7/UBA52/RPS26/RPL30	7
TRAPPC2	Aβ_up	GO:0006614	SRP-dependent cotranslational protein targeting to membrane	6/181	105/18866	0.000526627	0.0534073	0.0486103	RPS6/RPL39/RPL7/UBA52/RPS26/RPL30	6										R-HSA-2682334	EPH-Ephrin signaling	5/122	92/10704	0.00395622	0.0835514	0.0747065	MYH9/EFNB3/TIAM1/GIT1/EFNB2	5
EIF3I	Aβ_up	GO:0046928	regulation of neurotransmitter secretion	6/181	106/18866	0.000553845	0.0542952	0.0494185	KCNMB4/STXBP5L/NF1/RAB3GAP1/SYT7/GIT1	6										R-HSA-1236394	Signaling by ERBB4	4/122	58/10704	0.0042409	0.0835514	0.0747065	GFAP/UBA52/S100B/SOS1	4
KDELR2	Aβ_up	GO:0007517	muscle organ development	12/181	407/18866	0.000581818	0.055155	0.0502011	RB1/HDAC9/MEF2D/NF1/PPP3CA/CRYAB/NUPR1/MRAS/S100B/PRKAA1/EFNB2/CCNT2	12										R-HSA-72649	Translation initiation complex formation	4/122	58/10704	0.0042409	0.0835514	0.0747065	RPS6/EIF3I/EIF4H/RPS26	4
SLC6A17	Aβ_up	GO:0015800	acidic amino acid transport	5/181	71/18866	0.000600123	0.055155	0.0502011	NF1/NTRK2/ARL6IP1/SLC25A18/RAB3GAP1	5										R-HSA-72702	Ribosomal scanning and start codon recognition	4/122	58/10704	0.0042409	0.0835514	0.0747065	RPS6/EIF3I/EIF4H/RPS26	4
NDRG4	Aβ_up	GO:0071786	endoplasmic reticulum tubular network organization	3/181	18/18866	0.000637378	0.0568039	0.0517018	ATL2/ARL6IP1/RAB3GAP1	3										R-HSA-917937	Iron uptake and transport	4/122	58/10704	0.0042409	0.0835514	0.0747065	ATP6V1G1/FBXL5/UBA52/ATP6V1A	4
SMIM10L2B	Aβ_up	GO:0006401	RNA catabolic process	12/181	415/18866	0.000690118	0.0596952	0.0543335	RPS6/AGO3/LSM3/PSMB5/ZPR1/VIM/RPL39/RPL7/UBA52/RPS26/MTREX/RPL30	12										R-HSA-168273	Influenza Viral RNA Transcription and Replication	6/122	135/10704	0.00440903	0.0835514	0.0747065	RPS6/RPL39/RPL7/UBA52/RPS26/RPL30	6
ISLR2	Aβ_up	GO:0009132	nucleoside diphosphate metabolic process	7/181	155/18866	0.000752054	0.0604547	0.0550247	CMPK1/ENO2/NUPR1/TPI1/GPI/PRKAA1/AMPD3	7										R-HSA-72662	Activation of the mRNA upon binding of the cap-binding complex and eIFs, and subsequent binding to 43S	4/122	59/10704	0.00450988	0.0835514	0.0747065	RPS6/EIF3I/EIF4H/RPS26	4
TIAM1	Aβ_up	GO:0043087	regulation of GTPase activity	13/181	481/18866	0.000777796	0.0604547	0.0550247	TIAM1/STXBP5L/STMN3/CHN1/NF1/NTRK2/CDC42SE1/ARHGAP5/RDX/RAB3GAP1/MYO9A/SOS1/GIT1	13										R-HSA-9664407	Parasite infection	4/122	59/10704	0.00450988	0.0835514	0.0747065	MYH9/CYFIP2/NCK1/ABI1	4
SLC12A5	Aβ_up	GO:0006865	amino acid transport	7/181	156/18866	0.000781122	0.0604547	0.0550247	SLC25A38/SLC6A17/NF1/NTRK2/ARL6IP1/SLC25A18/RAB3GAP1	7										R-HSA-9664417	Leishmania phagocytosis	4/122	59/10704	0.00450988	0.0835514	0.0747065	MYH9/CYFIP2/NCK1/ABI1	4
CFDP1	Aβ_up	GO:0008360	regulation of cell shape	7/181	156/18866	0.000781122	0.0604547	0.0550247	MYH9/CFDP1/HEXB/CDC42SE1/S100B/RDX/CFAP410	7										R-HSA-9664422	FCGR3A-mediated phagocytosis	4/122	59/10704	0.00450988	0.0835514	0.0747065	MYH9/CYFIP2/NCK1/ABI1	4
CYFIP2	Aβ_up	GO:0009124	nucleoside monophosphate biosynthetic process	4/181	44/18866	0.000824508	0.0606219	0.0551769	CMPK1/IMPDH2/HPRT1/AMPD3	4										R-HSA-8866652	Synthesis of active ubiquitin: roles of E1 and E2 enzymes	3/122	30/10704	0.00468559	0.0845808	0.075627	UBA52/UBE2D2/UBE2A	3
PSMB5	Aβ_up	GO:1903053	regulation of extracellular matrix organization	4/181	44/18866	0.000824508	0.0606219	0.0551769	DDR1/RB1/CST3/PHLDB1	4										R-HSA-2029482	Regulation of actin dynamics for phagocytic cup formation	4/122	61/10704	0.00508185	0.0888874	0.0794776	MYH9/CYFIP2/NCK1/ABI1	4
KDM4B	Aβ_up	GO:0009168	purine ribonucleoside monophosphate biosynthetic process	3/181	20/18866	0.00087798	0.0614795	0.0559575	IMPDH2/HPRT1/AMPD3	3										R-HSA-202424	Downstream TCR signaling	5/122	98/10704	0.00517668	0.0888874	0.0794776	PSMB5/HLA-DPB1/HLA-DRB1/UBA52/UBE2D2	5
RB1	Aβ_up	GO:0070262	peptidyl-serine dephosphorylation	3/181	20/18866	0.00087798	0.0614795	0.0559575	PPP3CA/NCK1/PPTC7	3										R-HSA-15869	Metabolism of nucleotides	5/122	101/10704	0.00587754	0.0985188	0.0880894	CMPK1/IMPDH2/HPRT1/RRM2B/AMPD3	5
ZPR1	Aβ_up	GO:0031641	regulation of myelination	4/181	46/18866	0.000976477	0.0664673	0.0604973	ZPR1/RARB/S100B/CTSC	4										R-HSA-2559585	Oncogene Induced Senescence	3/122	33/10704	0.00614263	0.100568	0.0899215	AGO3/RB1/UBA52	3
RTRAF	Aβ_up	GO:0014075	response to amine	4/181	47/18866	0.00105939	0.0664673	0.0604973	HDAC9/PPP3CA/HPRT1/RRM2B	4										R-HSA-9028731	Activated NTRK2 signals through FRS2 and FRS3	2/122	11/10704	0.0066257	0.102953	0.0920544	NTRK2/SOS1	2
TMEM203	Aβ_up	GO:0000184	nuclear-transcribed mRNA catabolic process, nonsense-mediated decay	6/181	120/18866	0.00106221	0.0664673	0.0604973	RPS6/RPL39/RPL7/UBA52/RPS26/RPL30	6										R-HSA-202433	Generation of second messenger molecules	3/122	34/10704	0.00668174	0.102953	0.0920544	HLA-DPB1/NCK1/HLA-DRB1	3
IMPDH2	Aβ_up	GO:0045047	protein targeting to ER	6/181	120/18866	0.00106221	0.0664673	0.0604973	RPS6/RPL39/RPL7/UBA52/RPS26/RPL30	6										R-HSA-72203	Processing of Capped Intron-Containing Pre-mRNA	8/122	244/10704	0.00672705	0.102953	0.0920544	CPSF7/LSM3/RBM5/WTAP/SRRM1/MTREX/SMNDC1/FYTTD1	8
ATL2	Aβ_up	GO:0051588	regulation of neurotransmitter transport	6/181	120/18866	0.00106221	0.0664673	0.0604973	KCNMB4/STXBP5L/NF1/RAB3GAP1/SYT7/GIT1	6										R-HSA-5663213	RHO GTPases Activate WASPs and WAVEs	3/122	36/10704	0.0078422	0.117466	0.105031	CYFIP2/NCK1/ABI1	3
YPEL1	Aβ_up	GO:2001242	regulation of intrinsic apoptotic signaling pathway	7/181	166/18866	0.00112346	0.0688356	0.0626528	NCK1/SOD2/NUPR1/MIF/IVNS1ABP/SKIL/RRM2B	7										R-HSA-168255	Influenza Infection	6/122	156/10704	0.00879665	0.127792	0.114264	RPS6/RPL39/RPL7/UBA52/RPS26/RPL30	6
STXBP5L	Aβ_up	GO:0009127	purine nucleoside monophosphate biosynthetic process	3/181	22/18866	0.00116944	0.0701904	0.063886	IMPDH2/HPRT1/AMPD3	3										R-HSA-983705	Signaling by the B Cell Receptor (BCR)	5/122	112/10704	0.00902067	0.127792	0.114264	PSMB5/PPP3CA/NCK1/UBA52/SOS1	5
STMN3	Aβ_up	GO:0048145	regulation of fibroblast proliferation	5/181	83/18866	0.00122018	0.0711708	0.0647783	NF1/AQP1/NUPR1/BMI1/MIF	5										R-HSA-8950505	Gene and protein expression by JAK-STAT signaling after Interleukin-12 stimulation	3/122	38/10704	0.00911434	0.127792	0.114264	SOD2/MIF/HNRNPDL	3
CHN1	Aβ_up	GO:0010171	body morphogenesis	4/181	49/18866	0.00123984	0.0711708	0.0647783	PLEKHA1/SSBP3/PHLDB1/RAB3GAP1	4										R-HSA-74217	Purine salvage	2/122	13/10704	0.00925765	0.127792	0.114264	HPRT1/AMPD3	2
LINC02607	Aβ_up	GO:0046031	ADP metabolic process	6/181	124/18866	0.00125837	0.0711708	0.0647783	ENO2/NUPR1/TPI1/GPI/PRKAA1/AMPD3	6										R-HSA-428540	Activation of RAC1	2/122	14/10704	0.0107206	0.145141	0.129776	NCK1/SOS1	2
FBXL5	Aβ_up	GO:0048144	fibroblast proliferation	5/181	84/18866	0.00128747	0.0714426	0.0650257	NF1/AQP1/NUPR1/BMI1/MIF	5										R-HSA-3928662	EPHB-mediated forward signaling	3/122	42/10704	0.012002	0.159422	0.142546	EFNB3/TIAM1/EFNB2	3
TMEM246	Aβ_up	GO:0043010	camera-type eye development	10/181	332/18866	0.00141776	0.0770411	0.0701213	RAB11FIP4/IMPDH2/IFT172/NF1/NTRK2/VIM/CRYAB/RAB3GAP1/SKIL/SOS1	10										R-HSA-2173793	Transcriptional activity of SMAD2/SMAD3:SMAD4 heterotrimer	3/122	44/10704	0.0136208	0.175106	0.156569	UBA52/SKIL/CCNT2	3
C9orf16	Aβ_up	GO:0009161	ribonucleoside monophosphate metabolic process	4/181	51/18866	0.00144075	0.0770411	0.0701213	CMPK1/IMPDH2/HPRT1/AMPD3	4										R-HSA-2559584	Formation of Senescence-Associated Heterochromatin Foci (SAHF)	2/122	16/10704	0.0139288	0.175106	0.156569	RB1/EP400	2
HDAC9	Aβ_up	GO:0007269	neurotransmitter secretion	7/181	175/18866	0.00152338	0.0786009	0.071541	ERC2/KCNMB4/STXBP5L/NF1/RAB3GAP1/SYT7/GIT1	7										R-HSA-3229121	Glycogen storage diseases	2/122	16/10704	0.0139288	0.175106	0.156569	G6PC3/UBA52	2
MEF2D	Aβ_up	GO:0099643	signal release from synapse	7/181	175/18866	0.00152338	0.0786009	0.071541	ERC2/KCNMB4/STXBP5L/NF1/RAB3GAP1/SYT7/GIT1	7										R-HSA-9020591	Interleukin-12 signaling	3/122	47/10704	0.0162713	0.200965	0.179691	SOD2/MIF/HNRNPDL	3
NR2F1	Aβ_up	GO:0070482	response to oxygen levels	11/181	396/18866	0.00158168	0.0802019	0.0729982	ATP6V1G1/PSMB5/NF1/CST3/AQP1/CRYAB/UBA52/S100B/PRKAA1/ATP6V1A/PRKCE	11										R-HSA-881907	Gastrin-CREB signalling pathway via PKC and MAPK	2/122	18/10704	0.0174981	0.206351	0.184507	RPS6KA3/SOS1	2
IFT172	Aβ_up	GO:0019083	viral transcription	7/181	178/18866	0.00167881	0.0828553	0.0754133	RPS6/RPL39/RPL7/UBA52/RPS26/RPL30/CCNT2	7										R-HSA-72766	Translation	8/122	291/10704	0.0180846	0.206351	0.184507	RPS6/EIF3I/RPL39/RPL7/UBA52/EIF4H/RPS26/RPL30	8
NF1	Aβ_up	GO:0006836	neurotransmitter transport	8/181	229/18866	0.00169035	0.0828553	0.0754133	ERC2/KCNMB4/SLC6A17/STXBP5L/NF1/RAB3GAP1/SYT7/GIT1	8										R-HSA-72163	mRNA Splicing - Major Pathway	6/122	183/10704	0.0181883	0.206351	0.184507	CPSF7/LSM3/RBM5/SRRM1/MTREX/SMNDC1	6
HEXB	Aβ_up	GO:0051259	protein complex oligomerization	8/181	231/18866	0.00178511	0.0854031	0.0777323	CPSF7/ATL2/SOD2/HLA-DRB1/MIF/HPRT1/KCTD15/PRMT8	8										R-HSA-166520	Signaling by NTRKs	5/122	134/10704	0.0184499	0.206351	0.184507	TIAM1/MEF2D/RPS6KA3/NTRK2/SOS1	5
GDAP1	Aβ_up	GO:0006165	nucleoside diphosphate phosphorylation	6/181	133/18866	0.00180041	0.0854031	0.0777323	CMPK1/ENO2/NUPR1/TPI1/GPI/PRKAA1	6										R-HSA-2454202	Fc epsilon receptor (FCERI) signaling	5/122	134/10704	0.0184499	0.206351	0.184507	PSMB5/PPP3CA/UBA52/UBE2D2/SOS1	5
RPS6KA3	Aβ_up	GO:0034103	regulation of tissue remodeling	5/181	91/18866	0.00183788	0.0857969	0.0780907	NF1/PPP3CA/CST3/SPP1/SYT7	5										R-HSA-1227986	Signaling by ERBB2	3/122	50/10704	0.0191913	0.206351	0.184507	UBA52/SOS1/PRKCE	3
ENO2	Aβ_up	GO:0046939	nucleotide phosphorylation	6/181	135/18866	0.00194177	0.0884725	0.080526	CMPK1/ENO2/NUPR1/TPI1/GPI/PRKAA1	6										R-HSA-1236382	Constitutive Signaling by Ligand-Responsive EGFR Cancer Variants	2/122	19/10704	0.0194126	0.206351	0.184507	UBA52/SOS1	2
STARD10	Aβ_up	GO:0071453	cellular response to oxygen levels	8/181	235/18866	0.00198721	0.0884725	0.080526	ATP6V1G1/PSMB5/AQP1/UBA52/S100B/PRKAA1/ATP6V1A/PRKCE	8										R-HSA-202430	Translocation of ZAP-70 to Immunological synapse	2/122	19/10704	0.0194126	0.206351	0.184507	HLA-DPB1/HLA-DRB1	2
CCDC43	Aβ_up	GO:0009135	purine nucleoside diphosphate metabolic process	6/181	136/18866	0.00201553	0.0884725	0.080526	ENO2/NUPR1/TPI1/GPI/PRKAA1/AMPD3	6										R-HSA-5637815	Signaling by Ligand-Responsive EGFR Variants in Cancer	2/122	19/10704	0.0194126	0.206351	0.184507	UBA52/SOS1	2
PPP3CA	Aβ_up	GO:0009179	purine ribonucleoside diphosphate metabolic process	6/181	136/18866	0.00201553	0.0884725	0.080526	ENO2/NUPR1/TPI1/GPI/PRKAA1/AMPD3	6										R-HSA-70326	Glucose metabolism	4/122	91/10704	0.0200748	0.206351	0.184507	ENO2/G6PC3/TPI1/GPI	4
FSD1	Aβ_up	GO:0006735	NADH regeneration	3/181	27/18866	0.00214439	0.0900952	0.0820029	ENO2/TPI1/GPI	3										R-HSA-3928665	EPH-ephrin mediated repulsion of cells	3/122	51/10704	0.0202248	0.206351	0.184507	EFNB3/TIAM1/EFNB2	3
SOX2	Aβ_up	GO:0061621	canonical glycolysis	3/181	27/18866	0.00214439	0.0900952	0.0820029	ENO2/TPI1/GPI	3										R-HSA-72695	Formation of the ternary complex, and subsequently, the 43S complex	3/122	51/10704	0.0202248	0.206351	0.184507	RPS6/EIF3I/RPS26	3
LMBRD1	Aβ_up	GO:0061718	glucose catabolic process to pyruvate	3/181	27/18866	0.00214439	0.0900952	0.0820029	ENO2/TPI1/GPI	3										R-HSA-194840	Rho GTPase cycle	5/122	138/10704	0.0206723	0.206482	0.184623	TIAM1/CHN1/ARHGAP5/MYO9A/SOS1	5
CLDN12	Aβ_up	GO:0061620	glycolytic process through glucose-6-phosphate	3/181	28/18866	0.0023849	0.0987888	0.0899157	ENO2/TPI1/GPI	3										R-HSA-383280	Nuclear Receptor transcription pathway	3/122	52/10704	0.0212884	0.206482	0.184623	NR2F6/NR2F1/RARB	3
COX6C	Aβ_up	GO:0007409	axonogenesis	12/181	482/18866	0.00244746	0.0999721	0.0909927	EFNB3/ISLR2/TIAM1/CHN1/NTRK2/MYCBP2/SPP1/S100B/SEMA4F/SKIL/SOS1/EFNB2	12										R-HSA-168927	TICAM1, RIP1-mediated IKK complex recruitment	2/122	20/10704	0.0214108	0.206482	0.184623	UBA52/UBE2D2	2
GFAP	Aβ_up	GO:0006835	dicarboxylic acid transport	5/181	98/18866	0.00254359	0.102475	0.0932711	NF1/NTRK2/ARL6IP1/SLC25A18/RAB3GAP1	5										R-HSA-8876384	Listeria monocytogenes entry into host cells	2/122	20/10704	0.0214108	0.206482	0.184623	UBA52/CTNND1	2
MTRNR2L8	Aβ_up	GO:0061615	glycolytic process through fructose-6-phosphate	3/181	29/18866	0.00264147	0.104981	0.0955513	ENO2/TPI1/GPI	3										R-HSA-72172	mRNA Splicing	6/122	191/10704	0.0219421	0.208747	0.186649	CPSF7/LSM3/RBM5/SRRM1/MTREX/SMNDC1	6
CST3	Aβ_up	GO:0019080	viral gene expression	7/181	195/18866	0.00280632	0.110045	0.100161	RPS6/RPL39/RPL7/UBA52/RPS26/RPL30/CCNT2	7										R-HSA-168164	Toll Like Receptor 3 (TLR3) Cascade	4/122	94/10704	0.0223217	0.209526	0.187345	RPS6KA3/UBA52/S100B/UBE2D2	4
MT-ND1	Aβ_up	GO:0048813	dendrite morphogenesis	6/181	146/18866	0.0028749	0.111251	0.101259	TANC2/TIAM1/PPP3CA/HPRT1/CTNND2/ABI1	6										R-HSA-2559583	Cellular Senescence	6/122	197/10704	0.0250798	0.22389	0.200189	AGO3/RB1/RPS6KA3/BMI1/UBA52/EP400	6
MT-ATP6	Aβ_up	GO:0009154	purine ribonucleotide catabolic process	3/181	31/18866	0.00320413	0.122381	0.111389	HPRT1/NUDT3/AMPD3	3										R-HSA-1250196	SHC1 events in ERBB2 signaling	2/122	22/10704	0.0256496	0.22389	0.200189	SOS1/PRKCE	2
MT-CO1	Aβ_up	GO:0006402	mRNA catabolic process	10/181	376/18866	0.00349235	0.130703	0.118963	RPS6/AGO3/LSM3/PSMB5/VIM/RPL39/RPL7/UBA52/RPS26/RPL30	10										R-HSA-202427	Phosphorylation of CD3 and TCR zeta chains	2/122	22/10704	0.0256496	0.22389	0.200189	HLA-DPB1/HLA-DRB1	2
MT-ND5	Aβ_up	GO:0009261	ribonucleotide catabolic process	3/181	32/18866	0.00351088	0.130703	0.118963	HPRT1/NUDT3/AMPD3	3										R-HSA-3296482	Defects in vitamin and cofactor metabolism	2/122	22/10704	0.0256496	0.22389	0.200189	LMBRD1/PCCA	2
MT-CO2	Aβ_up	GO:0001975	response to amphetamine	3/181	33/18866	0.00383499	0.13906	0.12657	HDAC9/PPP3CA/HPRT1	3										R-HSA-166166	MyD88-independent TLR4 cascade	4/122	99/10704	0.0263961	0.22389	0.200189	RPS6KA3/UBA52/S100B/UBE2D2	4
MT-ND3	Aβ_up	GO:0048011	neurotrophin TRK receptor signaling pathway	3/181	33/18866	0.00383499	0.13906	0.12657	CYFIP2/NTRK2/SOS1	3										R-HSA-4420097	VEGFA-VEGFR2 Pathway	4/122	99/10704	0.0263961	0.22389	0.200189	CYFIP2/NCK1/ABI1/CTNND1	4
CD63	Aβ_up	GO:0006188	IMP biosynthetic process	2/181	10/18866	0.00391595	0.13906	0.12657	HPRT1/AMPD3	2										R-HSA-937061	TRIF(TICAM1)-mediated TLR4 signaling	4/122	99/10704	0.0263961	0.22389	0.200189	RPS6KA3/UBA52/S100B/UBE2D2	4
HLA-DPB1	Aβ_up	GO:0034332	adherens junction organization	4/181	67/18866	0.0039245	0.13906	0.12657	RDX/CDH10/EFNB2/CTNND1	4										R-HSA-447115	Interleukin-12 family signaling	3/122	57/10704	0.0270596	0.22389	0.200189	SOD2/MIF/HNRNPDL	3
BX255925.3	Aβ_up	GO:0043484	regulation of RNA splicing	6/181	156/18866	0.00398313	0.139457	0.126931	ZPR1/NOVA1/RBM5/WTAP/RPS26/IK	6										R-HSA-2173795	Downregulation of SMAD2/3:SMAD4 transcriptional activity	2/122	23/10704	0.0278861	0.22389	0.200189	UBA52/SKIL	2
FADS2	Aβ_up	GO:0051056	regulation of small GTPase mediated signal transduction	9/181	323/18866	0.00407352	0.140944	0.128284	TIAM1/STMN3/CHN1/NF1/CDC42SE1/ARHGAP5/RDX/MYO9A/SOS1	9										R-HSA-389948	PD-1 signaling	2/122	23/10704	0.0278861	0.22389	0.200189	HLA-DPB1/HLA-DRB1	2
G6PC3	Aβ_up	GO:0002756	MyD88-independent toll-like receptor signaling pathway	3/181	34/18866	0.00417675	0.140972	0.12831	UBA52/UBE2D2/PRKCE	3										R-HSA-8956321	Nucleotide salvage	2/122	23/10704	0.0278861	0.22389	0.200189	HPRT1/AMPD3	2
NCK1	Aβ_up	GO:0000956	nuclear-transcribed mRNA catabolic process	7/181	210/18866	0.00421814	0.140972	0.12831	RPS6/LSM3/RPL39/RPL7/UBA52/RPS26/RPL30	7										R-HSA-5607764	CLEC7A (Dectin-1) signaling	4/122	101/10704	0.0281429	0.22389	0.200189	PSMB5/PPP3CA/UBA52/UBE2D2	4
NTRK2	Aβ_up	GO:0006612	protein targeting to membrane	7/181	210/18866	0.00421814	0.140972	0.12831	RPS6/ARL6IP1/RPL39/RPL7/UBA52/RPS26/RPL30	7										R-HSA-186797	Signaling by PDGF	3/122	58/10704	0.0283042	0.22389	0.200189	NCK1/SPP1/SOS1	3
SOD2	Aβ_up	GO:0035914	skeletal muscle cell differentiation	4/181	69/18866	0.00436139	0.144122	0.131177	RB1/MEF2D/NUPR1/S100B	4										R-HSA-72187	mRNA 3'-end processing	3/122	58/10704	0.0283042	0.22389	0.200189	CPSF7/SRRM1/FYTTD1	3
ARL6IP1	Aβ_up	GO:0050804	modulation of chemical synaptic transmission	11/181	454/18866	0.00450157	0.146266	0.133129	EFNB3/KCNMB4/STXBP5L/NF1/PPP3CA/NTRK2/S100B/RAB3GAP1/PRKCE/SYT7/GIT1	11										R-HSA-9612973	Autophagy	5/122	151/10704	0.0290799	0.227469	0.203389	GFAP/VIM/GABARAPL1/UBA52/PRKAA1	5
AQP1	Aβ_up	GO:0002183	cytoplasmic translational initiation	3/181	35/18866	0.00453643	0.146266	0.133129	EIF3I/NCK1/EIF4H	3										R-HSA-8866654	E3 ubiquitin ligases ubiquitinate target proteins	3/122	59/10704	0.0295789	0.228831	0.204606	UBA52/UBE2D2/UBE2A	3
VIM	Aβ_up	GO:0099177	regulation of trans-synaptic signaling	11/181	455/18866	0.00457548	0.146266	0.133129	EFNB3/KCNMB4/STXBP5L/NF1/PPP3CA/NTRK2/S100B/RAB3GAP1/PRKCE/SYT7/GIT1	11										R-HSA-1643713	Signaling by EGFR in Cancer	2/122	25/10704	0.0325834	0.246653	0.220542	UBA52/SOS1	2
SLC25A18	Aβ_up	GO:0006007	glucose catabolic process	3/181	36/18866	0.00491431	0.153755	0.139945	ENO2/TPI1/GPI	3										R-HSA-937041	IKK complex recruitment mediated by RIP1	2/122	25/10704	0.0325834	0.246653	0.220542	UBA52/UBE2D2	2
PES1	Aβ_up	GO:0060323	head morphogenesis	3/181	36/18866	0.00491431	0.153755	0.139945	PLEKHA1/SSBP3/RAB3GAP1	3										R-HSA-194138	Signaling by VEGF	4/122	108/10704	0.0347905	0.259667	0.232178	CYFIP2/NCK1/ABI1/CTNND1	4
CRYAB	Aβ_up	GO:0006096	glycolytic process	5/181	115/18866	0.00504753	0.155518	0.14155	ENO2/NUPR1/TPI1/GPI/PRKAA1	5										R-HSA-77387	Insulin receptor recycling	2/122	26/10704	0.0350403	0.259667	0.232178	ATP6V1G1/ATP6V1A	2
STAC2	Aβ_up	GO:0009123	nucleoside monophosphate metabolic process	4/181	72/18866	0.00507641	0.155518	0.14155	CMPK1/IMPDH2/HPRT1/AMPD3	4										R-HSA-421270	Cell-cell junction organization	3/122	64/10704	0.0364004	0.266936	0.238678	CLDN12/CDH10/CTNND1	3
CHI3L2	Aβ_up	GO:0006757	ATP generation from ADP	5/181	116/18866	0.00523479	0.158374	0.144149	ENO2/NUPR1/TPI1/GPI/PRKAA1	5										R-HSA-449147	Signaling by Interleukins	10/122	461/10704	0.0375384	0.272443	0.243602	PSMB5/RPS6KA3/SOX2/SOD2/VIM/MIF/UBA52/S100B/HNRNPDL/SOS1	10
RPL39	Aβ_up	GO:0009167	purine ribonucleoside monophosphate metabolic process	3/181	37/18866	0.00531063	0.158374	0.144149	IMPDH2/HPRT1/AMPD3	3										R-HSA-1234176	Oxygen-dependent proline hydroxylation of Hypoxia-inducible Factor Alpha	3/122	66/10704	0.0393361	0.282578	0.252664	PSMB5/UBA52/UBE2D2	3
MYCBP2	Aβ_up	GO:0015807	L-amino acid transport	4/181	73/18866	0.00533118	0.158374	0.144149	SLC25A38/SLC6A17/ARL6IP1/SLC25A18	4										R-HSA-73856	RNA Polymerase II Transcription Termination	3/122	67/10704	0.0408479	0.290474	0.259724	CPSF7/SRRM1/FYTTD1	3
CDC42SE1	Aβ_up	GO:0051047	positive regulation of secretion	9/181	340/18866	0.0056652	0.165145	0.150312	AQP1/SPP1/HLA-DRB1/MIF/RAB2B/RAB3GAP1/GPI/PRKCE/SYT7	9										R-HSA-187037	Signaling by NTRK1 (TRKA)	4/122	115/10704	0.0422768	0.292677	0.261694	MEF2D/RPS6KA3/NTRK2/SOS1	4
NUPR1	Aβ_up	GO:0001778	plasma membrane repair	2/181	12/18866	0.00567142	0.165145	0.150312	MYH9/SYT7	2										R-HSA-5658442	Regulation of RAS by GAPs	3/122	68/10704	0.0423888	0.292677	0.261694	PSMB5/NF1/UBA52	3
GABARAPL1	Aβ_up	GO:0000381	regulation of alternative mRNA splicing, via spliceosome	4/181	76/18866	0.00614645	0.172527	0.15703	NOVA1/RBM5/WTAP/IK	4										R-HSA-186763	Downstream signal transduction	2/122	29/10704	0.0428206	0.292677	0.261694	NCK1/SOS1	2
LONRF2	Aβ_up	GO:0016601	Rac protein signal transduction	3/181	39/18866	0.00615957	0.172527	0.15703	TIAM1/STMN3/NF1	3										R-HSA-9615017	FOXO-mediated transcription of oxidative stress, metabolic and neuronal genes	2/122	29/10704	0.0428206	0.292677	0.261694	SOD2/NPY	2
DPYSL3	Aβ_up	GO:0038179	neurotrophin signaling pathway	3/181	39/18866	0.00615957	0.172527	0.15703	CYFIP2/NTRK2/SOS1	3										R-HSA-499943	Interconversion of nucleotide di- and triphosphates	2/122	30/10704	0.0455445	0.308302	0.275664	CMPK1/RRM2B	2
NRSN1	Aβ_up	GO:1901068	guanosine-containing compound metabolic process	3/181	39/18866	0.00615957	0.172527	0.15703	IMPDH2/HPRT1/AMPD3	3										R-HSA-70171	Glycolysis	3/122	71/10704	0.0471843	0.31636	0.28287	ENO2/TPI1/GPI	3
RPL7	Aβ_up	GO:0016079	synaptic vesicle exocytosis	5/181	121/18866	0.0062454	0.17328	0.157717	ERC2/STXBP5L/RAB3GAP1/SYT7/GIT1	5										R-HSA-917977	Transferrin endocytosis and recycling	2/122	31/10704	0.0483307	0.320989	0.287009	ATP6V1G1/ATP6V1A	2
SPP1	Aβ_up	GO:0007265	Ras protein signal transduction	9/181	346/18866	0.00632921	0.173359	0.157788	TIAM1/RB1/STMN3/NF1/CDC42SE1/MRAS/ARHGAP5/RDX/SOS1	9
FAM214B	Aβ_up	GO:0050806	positive regulation of synaptic transmission	6/181	172/18866	0.00637392	0.173359	0.157788	NF1/NTRK2/S100B/RAB3GAP1/PRKCE/SYT7	6
HLA-DRB1	Aβ_up	GO:0009126	purine nucleoside monophosphate metabolic process	3/181	40/18866	0.00661263	0.173359	0.157788	IMPDH2/HPRT1/AMPD3	3
MRAS	Aβ_up	GO:0032892	positive regulation of organic acid transport	3/181	40/18866	0.00661263	0.173359	0.157788	ARL6IP1/MIF/RAB3GAP1	3
NARF	Aβ_up	GO:0015816	glycine transport	2/181	13/18866	0.00666052	0.173359	0.157788	SLC25A38/SLC6A17	2
NOVA1	Aβ_up	GO:0046040	IMP metabolic process	2/181	13/18866	0.00666052	0.173359	0.157788	HPRT1/AMPD3	2
R3HDM1	Aβ_up	GO:2001233	regulation of apoptotic signaling pathway	10/181	413/18866	0.00667811	0.173359	0.157788	RB1/NF1/NCK1/SOD2/NUPR1/MIF/IVNS1ABP/CTSC/SKIL/RRM2B	10
TPM4	Aβ_up	GO:0007033	vacuole organization	6/181	174/18866	0.00673302	0.173359	0.157788	HEXB/ENO2/NUPR1/GABARAPL1/RAB3GAP1/SYT7	6
RBM5	Aβ_up	GO:0046942	carboxylic acid transport	9/181	350/18866	0.00680416	0.173359	0.157788	SLC25A38/SLC6A17/NF1/STARD10/NTRK2/ARL6IP1/SLC25A18/MIF/RAB3GAP1	9
BMI1	Aβ_up	GO:0050680	negative regulation of epithelial cell proliferation	6/181	175/18866	0.00691798	0.173359	0.157788	RB1/IFT172/NF1/SOX2/NUPR1/EFNB2	6
MTDH	Aβ_up	GO:0009259	ribonucleotide metabolic process	10/181	416/18866	0.007012	0.173359	0.157788	CMPK1/IMPDH2/ENO2/NUPR1/HPRT1/TPI1/GPI/PRKAA1/NUDT3/AMPD3	10
CDC123	Aβ_up	GO:0010976	positive regulation of neuron projection development	8/181	290/18866	0.0070341	0.173359	0.157788	NDRG4/ISLR2/TIAM1/NCK1/NTRK2/DPYSL3/STMN2/SKIL	8
DACT3	Aβ_up	GO:0050708	regulation of protein secretion	9/181	352/18866	0.00705167	0.173359	0.157788	TIAM1/STXBP5L/HDAC9/PPP3CA/HLA-DRB1/MIF/GPI/PRKCE/SYT7	9
MTRES1	Aβ_up	GO:0006734	NADH metabolic process	3/181	41/18866	0.00708502	0.173359	0.157788	ENO2/TPI1/GPI	3
MIF	Aβ_up	GO:0015849	organic acid transport	9/181	353/18866	0.00717799	0.173359	0.157788	SLC25A38/SLC6A17/NF1/STARD10/NTRK2/ARL6IP1/SLC25A18/MIF/RAB3GAP1	9
SPARCL1	Aβ_up	GO:2000300	regulation of synaptic vesicle exocytosis	4/181	80/18866	0.0073568	0.173359	0.157788	STXBP5L/RAB3GAP1/SYT7/GIT1	4
ASCC3	Aβ_up	GO:0051260	protein homooligomerization	6/181	178/18866	0.00749496	0.173359	0.157788	ATL2/SOD2/MIF/HPRT1/KCTD15/PRMT8	6
HPRT1	Aβ_up	GO:0001505	regulation of neurotransmitter levels	7/181	235/18866	0.00768784	0.173359	0.157788	ERC2/KCNMB4/STXBP5L/NF1/RAB3GAP1/SYT7/GIT1	7
UBA52	Aβ_up	GO:0035437	maintenance of protein localization in endoplasmic reticulum	2/181	14/18866	0.00772186	0.173359	0.157788	ANKRD13C/KDELR2	2
RAB2B	Aβ_up	GO:0036295	cellular response to increased oxygen levels	2/181	14/18866	0.00772186	0.173359	0.157788	ATP6V1G1/ATP6V1A	2
RARB	Aβ_up	GO:0043173	nucleotide salvage	2/181	14/18866	0.00772186	0.173359	0.157788	HPRT1/AMPD3	2
PTRHD1	Aβ_up	GO:0046037	GMP metabolic process	2/181	14/18866	0.00772186	0.173359	0.157788	IMPDH2/HPRT1	2
S100B	Aβ_up	GO:0071361	cellular response to ethanol	2/181	14/18866	0.00772186	0.173359	0.157788	PRKAA1/PRKCE	2
TPI1	Aβ_up	GO:0099550	trans-synaptic signaling, modulating synaptic transmission	2/181	14/18866	0.00772186	0.173359	0.157788	EFNB3/NTRK2	2
IVNS1ABP	Aβ_up	GO:1901070	guanosine-containing compound biosynthetic process	2/181	14/18866	0.00772186	0.173359	0.157788	IMPDH2/HPRT1	2
DPY19L3	Aβ_up	GO:0060560	developmental growth involved in morphogenesis	7/181	236/18866	0.00786047	0.174011	0.158382	DDR1/ISLR2/TIAM1/CYFIP2/SPP1/SEMA4F/MESP1	7
ARHGAP5	Aβ_up	GO:0001666	response to hypoxia	9/181	359/18866	0.00797273	0.174011	0.158382	PSMB5/NF1/CST3/AQP1/CRYAB/UBA52/S100B/PRKAA1/PRKCE	9
EIF4H	Aβ_up	GO:0021954	central nervous system neuron development	4/181	82/18866	0.00801687	0.174011	0.158382	NTRK2/MYCBP2/HPRT1/NPY	4
WTAP	Aβ_up	GO:0010470	regulation of gastrulation	3/181	43/18866	0.00808857	0.174011	0.158382	MBP/PHLDB1/MESP1	3
UBE2QL1	Aβ_up	GO:0008361	regulation of cell size	6/181	181/18866	0.00810593	0.174011	0.158382	ISLR2/SLC12A5/AQP1/SPP1/RDX/SEMA4F	6
AC020915.2	Aβ_up	GO:0050796	regulation of insulin secretion	6/181	181/18866	0.00810593	0.174011	0.158382	TIAM1/STXBP5L/PPP3CA/HLA-DRB1/PRKCE/SYT7	6
API5	Aβ_up	GO:0019693	ribose phosphate metabolic process	10/181	427/18866	0.00834837	0.17714	0.161229	CMPK1/IMPDH2/ENO2/NUPR1/HPRT1/TPI1/GPI/PRKAA1/NUDT3/AMPD3	10
DNAJC9	Aβ_up	GO:0006195	purine nucleotide catabolic process	3/181	44/18866	0.00862009	0.17714	0.161229	HPRT1/NUDT3/AMPD3	3
AC073111.4	Aβ_up	GO:0038093	Fc receptor signaling pathway	7/181	241/18866	0.00876689	0.17714	0.161229	CYFIP2/PSMB5/PPP3CA/NCK1/SOS1/PRKCE/ABI1	7
PCCA	Aβ_up	GO:0000463	maturation of LSU-rRNA from tricistronic rRNA transcript (SSU-rRNA, 5.8S rRNA, LSU-rRNA)	2/181	15/18866	0.00885399	0.17714	0.161229	PES1/RPL7	2
CTSC	Aβ_up	GO:0001711	endodermal cell fate commitment	2/181	15/18866	0.00885399	0.17714	0.161229	SOX2/MESP1	2
ZNF337	Aβ_up	GO:0006388	tRNA splicing, via endonucleolytic cleavage and ligation	2/181	15/18866	0.00885399	0.17714	0.161229	FAM98B/RTRAF	2
CREBL2	Aβ_up	GO:0043101	purine-containing compound salvage	2/181	15/18866	0.00885399	0.17714	0.161229	HPRT1/AMPD3	2
RDX	Aβ_up	GO:0072567	chemokine (C-X-C motif) ligand 2 production	2/181	15/18866	0.00885399	0.17714	0.161229	MBP/MIF	2
RPS26	Aβ_up	GO:0099171	presynaptic modulation of chemical synaptic transmission	2/181	15/18866	0.00885399	0.17714	0.161229	SYT7/GIT1	2
CCDC12	Aβ_up	GO:2000341	regulation of chemokine (C-X-C motif) ligand 2 production	2/181	15/18866	0.00885399	0.17714	0.161229	MBP/MIF	2
KCTD15	Aβ_up	GO:0043154	negative regulation of cysteine-type endopeptidase activity involved in apoptotic process	4/181	85/18866	0.009078	0.180395	0.164192	RPS6KA3/ARL6IP1/AQP1/CRYAB	4
STMN2	Aβ_up	GO:0014047	glutamate secretion	3/181	45/18866	0.00917165	0.181032	0.164772	NF1/NTRK2/RAB3GAP1	3
UBE2D2	Aβ_up	GO:0050772	positive regulation of axonogenesis	4/181	86/18866	0.00945106	0.184281	0.167729	ISLR2/TIAM1/NTRK2/SKIL	4
CDH10	Aβ_up	GO:0071333	cellular response to glucose stimulus	5/181	134/18866	0.00950062	0.184281	0.167729	TIAM1/PPP3CA/HLA-DRB1/PRKAA1/PRKCE	5
PHLDB1	Aβ_up	GO:0042593	glucose homeostasis	7/181	245/18866	0.00954559	0.184281	0.167729	RPS6/TIAM1/STXBP5L/PPP3CA/HLA-DRB1/PRKAA1/PRKCE	7
GMPPA	Aβ_up	GO:0033500	carbohydrate homeostasis	7/181	246/18866	0.00974794	0.184281	0.167729	RPS6/TIAM1/STXBP5L/PPP3CA/HLA-DRB1/PRKAA1/PRKCE	7
UBE2A	Aβ_up	GO:0036293	response to decreased oxygen levels	9/181	371/18866	0.00976198	0.184281	0.167729	PSMB5/NF1/CST3/AQP1/CRYAB/UBA52/S100B/PRKAA1/PRKCE	9
CTNND2	Aβ_up	GO:0000380	alternative mRNA splicing, via spliceosome	4/181	87/18866	0.00983397	0.184281	0.167729	NOVA1/RBM5/WTAP/IK	4
CSRNP3	Aβ_up	GO:0051262	protein tetramerization	4/181	87/18866	0.00983397	0.184281	0.167729	CPSF7/SOD2/HLA-DRB1/HPRT1	4
HNRNPDL	Aβ_up	GO:0016358	dendrite development	7/181	247/18866	0.0099534	0.184281	0.167729	TANC2/TIAM1/SLC12A5/PPP3CA/HPRT1/CTNND2/ABI1	7
RAB3GAP1	Aβ_up	GO:0000394	RNA splicing, via endonucleolytic cleavage and ligation	2/181	16/18866	0.0100555	0.184281	0.167729	FAM98B/RTRAF	2
CAMK2N1	Aβ_up	GO:0006390	mitochondrial transcription	2/181	16/18866	0.0100555	0.184281	0.167729	MTRES1/PRKAA1	2
GPI	Aβ_up	GO:0071380	cellular response to prostaglandin E stimulus	2/181	16/18866	0.0100555	0.184281	0.167729	PRKAA1/PRKCE	2
MYO9A	Aβ_up	GO:0071331	cellular response to hexose stimulus	5/181	136/18866	0.0100881	0.184281	0.167729	TIAM1/PPP3CA/HLA-DRB1/PRKAA1/PRKCE	5
EP400	Aβ_up	GO:0035722	interleukin-12-mediated signaling pathway	3/181	47/18866	0.0103355	0.185624	0.168951	SOD2/MIF/HNRNPDL	3
PCBP3	Aβ_up	GO:0044088	regulation of vacuole organization	3/181	47/18866	0.0103355	0.185624	0.168951	ENO2/NUPR1/RAB3GAP1	3
CFAP410	Aβ_up	GO:0071326	cellular response to monosaccharide stimulus	5/181	137/18866	0.010391	0.185624	0.168951	TIAM1/PPP3CA/HLA-DRB1/PRKAA1/PRKCE	5
R3HDM4	Aβ_up	GO:0046034	ATP metabolic process	8/181	311/18866	0.0104739	0.185624	0.168951	ENO2/COX6C/NUPR1/TPI1/GPI/PRKAA1/ATP6V1A/AMPD3	8
PRKAA1	Aβ_up	GO:0006163	purine nucleotide metabolic process	10/181	442/18866	0.0104772	0.185624	0.168951	CMPK1/IMPDH2/ENO2/NUPR1/HPRT1/TPI1/GPI/PRKAA1/NUDT3/AMPD3	10
LARS	Aβ_up	GO:0006605	protein targeting	10/181	444/18866	0.0107897	0.190016	0.172948	RPS6/GDAP1/ARL6IP1/RPL39/RPL7/UBA52/RPS26/UBE2D2/PRKAA1/RPL30	10
TSPAN7	Aβ_up	GO:1903532	positive regulation of secretion by cell	8/181	313/18866	0.0108568	0.190058	0.172988	SPP1/HLA-DRB1/MIF/RAB2B/RAB3GAP1/GPI/PRKCE/SYT7	8
SEMA4F	Aβ_up	GO:0090382	phagosome maturation	3/181	48/18866	0.0109481	0.190522	0.17341	ATP6V1G1/ATP6V1A/SYT7	3
ATP6V1A	Aβ_up	GO:0032465	regulation of cytokinesis	4/181	90/18866	0.0110427	0.191038	0.173879	RAB11FIP4/FSD1/PRKCE/GIT1	4
NOSIP	Aβ_up	GO:0045666	positive regulation of neuron differentiation	9/181	380/18866	0.0112917	0.19135	0.174163	NDRG4/ISLR2/TIAM1/NCK1/NTRK2/DPYSL3/RARB/STMN2/SKIL	9
SRRM1	Aβ_up	GO:0010715	regulation of extracellular matrix disassembly	2/181	17/18866	0.0113249	0.19135	0.174163	DDR1/CST3	2
STRBP	Aβ_up	GO:0035020	regulation of Rac protein signal transduction	2/181	17/18866	0.0113249	0.19135	0.174163	STMN3/NF1	2
ERGIC3	Aβ_up	GO:1901136	carbohydrate derivative catabolic process	6/181	195/18866	0.0114378	0.19135	0.174163	HEXB/CST3/CHI3L2/HPRT1/NUDT3/AMPD3	6
HCG18	Aβ_up	GO:0006094	gluconeogenesis	4/181	91/18866	0.0114659	0.19135	0.174163	ENO2/G6PC3/TPI1/GPI	4
AMN1	Aβ_up	GO:0002791	regulation of peptide secretion	9/181	381/18866	0.0114721	0.19135	0.174163	TIAM1/STXBP5L/HDAC9/PPP3CA/HLA-DRB1/MIF/GPI/PRKCE/SYT7	9
NUDT3	Aβ_up	GO:0048641	regulation of skeletal muscle tissue development	3/181	49/18866	0.0115812	0.19135	0.174163	HDAC9/S100B/PRKAA1	3
MTREX	Aβ_up	GO:0071349	cellular response to interleukin-12	3/181	49/18866	0.0115812	0.19135	0.174163	SOD2/MIF/HNRNPDL	3
SKIL	Aβ_up	GO:0032535	regulation of cellular component size	9/181	383/18866	0.0118396	0.194526	0.177054	ISLR2/SLC12A5/CYFIP2/NCK1/AQP1/SPP1/RDX/SEMA4F/PRKCE	9
SOS1	Aβ_up	GO:0019674	NAD metabolic process	3/181	50/18866	0.012235	0.196225	0.1786	ENO2/TPI1/GPI	3
RRM2B	Aβ_up	GO:0045104	intermediate filament cytoskeleton organization	3/181	50/18866	0.012235	0.196225	0.1786	GFAP/VIM/INA	3
DENND6A	Aβ_up	GO:0046850	regulation of bone remodeling	3/181	50/18866	0.012235	0.196225	0.1786	NF1/SPP1/SYT7	3
AMPD3	Aβ_up	GO:0070671	response to interleukin-12	3/181	50/18866	0.012235	0.196225	0.1786	SOD2/MIF/HNRNPDL	3
NPY	Aβ_up	GO:0008286	insulin receptor signaling pathway	5/181	143/18866	0.0123402	0.196225	0.1786	ATP6V1G1/NCK1/PRKAA1/ATP6V1A/SOS1	5
MRFAP1L1	Aβ_up	GO:2000117	negative regulation of cysteine-type endopeptidase activity	4/181	93/18866	0.0123433	0.196225	0.1786	RPS6KA3/ARL6IP1/AQP1/CRYAB	4
MESP1	Aβ_up	GO:0021756	striatum development	2/181	18/18866	0.0126608	0.196691	0.179025	HPRT1/RARB	2
PPTC7	Aβ_up	GO:0046112	nucleobase biosynthetic process	2/181	18/18866	0.0126608	0.196691	0.179025	CMPK1/HPRT1	2
AC118549.1	Aβ_up	GO:0150078	positive regulation of neuroinflammatory response	2/181	18/18866	0.0126608	0.196691	0.179025	NUPR1/CTSC	2
PRMT8	Aβ_up	GO:0019319	hexose biosynthetic process	4/181	94/18866	0.0127977	0.196691	0.179025	ENO2/G6PC3/TPI1/GPI	4
RETREG2	Aβ_up	GO:0016052	carbohydrate catabolic process	6/181	200/18866	0.012833	0.196691	0.179025	HEXB/ENO2/NUPR1/TPI1/GPI/PRKAA1	6
B3GAT3	Aβ_up	GO:0045103	intermediate filament-based process	3/181	51/18866	0.0129097	0.196691	0.179025	GFAP/VIM/INA	3
REXO4	Aβ_up	GO:0048146	positive regulation of fibroblast proliferation	3/181	51/18866	0.0129097	0.196691	0.179025	AQP1/BMI1/MIF	3
IK	Aβ_up	GO:0072523	purine-containing compound catabolic process	3/181	51/18866	0.0129097	0.196691	0.179025	HPRT1/NUDT3/AMPD3	3
FEM1A	Aβ_up	GO:0033135	regulation of peptidyl-serine phosphorylation	5/181	145/18866	0.0130414	0.196691	0.179025	NCK1/NTRK2/MIF/CREBL2/PRKAA1	5
PRKCE	Aβ_up	GO:0071322	cellular response to carbohydrate stimulus	5/181	145/18866	0.0130414	0.196691	0.179025	TIAM1/PPP3CA/HLA-DRB1/PRKAA1/PRKCE	5
CNN3	Aβ_up	GO:0000377	RNA splicing, via transesterification reactions with bulged adenosine as nucleophile	9/181	390/18866	0.0131951	0.196989	0.179296	CPSF7/LSM3/NOVA1/RBM5/WTAP/SRRM1/MTREX/IK/SMNDC1	9
SYT7	Aβ_up	GO:0000398	mRNA splicing, via spliceosome	9/181	390/18866	0.0131951	0.196989	0.179296	CPSF7/LSM3/NOVA1/RBM5/WTAP/SRRM1/MTREX/IK/SMNDC1	9
GIT1	Aβ_up	GO:0042542	response to hydrogen peroxide	5/181	146/18866	0.0134019	0.199066	0.181186	PLEKHA1/CST3/AQP1/CRYAB/PRKAA1	5
ABI1	Aβ_up	GO:0000375	RNA splicing, via transesterification reactions	9/181	393/18866	0.0138102	0.204099	0.185767	CPSF7/LSM3/NOVA1/RBM5/WTAP/SRRM1/MTREX/IK/SMNDC1	9
EFNB2	Aβ_up	GO:0060973	cell migration involved in heart development	2/181	19/18866	0.0140619	0.20678	0.188207	NDRG4/MESP1	2
NTPCR	Aβ_up	GO:1901655	cellular response to ketone	4/181	97/18866	0.0142244	0.208129	0.189435	AQP1/SPP1/PRKAA1/PRKCE	4
INA	Aβ_up	GO:0048168	regulation of neuronal synaptic plasticity	3/181	53/18866	0.0143217	0.208516	0.189787	NF1/S100B/RAB3GAP1	3
CTNND1	Aβ_up	GO:0010771	negative regulation of cell morphogenesis involved in differentiation	4/181	98/18866	0.0147215	0.211736	0.192718	EFNB3/PPP3CA/SPP1/SEMA4F	4
SMNDC1	Aβ_up	GO:2001243	negative regulation of intrinsic apoptotic signaling pathway	4/181	98/18866	0.0147215	0.211736	0.192718	SOD2/MIF/IVNS1ABP/RRM2B	4
RPL30	Aβ_up	GO:0046883	regulation of hormone secretion	7/181	267/18866	0.0147589	0.211736	0.192718	TIAM1/STXBP5L/PPP3CA/SPP1/HLA-DRB1/PRKCE/SYT7	7
FYTTD1	Aβ_up	GO:0071456	cellular response to hypoxia	6/181	208/18866	0.0153072	0.21847	0.198847	PSMB5/AQP1/UBA52/S100B/PRKAA1/PRKCE	6
CCNT2	Aβ_up	GO:0043555	regulation of translation in response to stress	2/181	20/18866	0.0155268	0.21847	0.198847	RPS6KA3/NCK1	2
		GO:0009150	purine ribonucleotide metabolic process	9/181	401/18866	0.0155543	0.21847	0.198847	IMPDH2/ENO2/NUPR1/HPRT1/TPI1/GPI/PRKAA1/NUDT3/AMPD3	9
		GO:0006090	pyruvate metabolic process	5/181	152/18866	0.0157069	0.21847	0.198847	ENO2/NUPR1/TPI1/GPI/PRKAA1	5
		GO:0050684	regulation of mRNA processing	5/181	152/18866	0.0157069	0.21847	0.198847	CPSF7/NOVA1/RBM5/WTAP/IK	5
		GO:0046364	monosaccharide biosynthetic process	4/181	100/18866	0.0157482	0.21847	0.198847	ENO2/G6PC3/TPI1/GPI	4
		GO:0070301	cellular response to hydrogen peroxide	4/181	100/18866	0.0157482	0.21847	0.198847	PLEKHA1/CST3/AQP1/PRKAA1	4
		GO:0072521	purine-containing compound metabolic process	10/181	472/18866	0.0159492	0.219531	0.199813	CMPK1/IMPDH2/ENO2/NUPR1/HPRT1/TPI1/GPI/PRKAA1/NUDT3/AMPD3	10
		GO:0045216	cell-cell junction organization	6/181	210/18866	0.015974	0.219531	0.199813	MTDH/RDX/CDH10/CTNND2/EFNB2/CTNND1	6
		GO:0001678	cellular glucose homeostasis	5/181	153/18866	0.0161152	0.220062	0.200297	TIAM1/PPP3CA/HLA-DRB1/PRKAA1/PRKCE	5
		GO:0051346	negative regulation of hydrolase activity	10/181	473/18866	0.0161623	0.220062	0.200297	HDAC9/RPS6KA3/CST3/ARL6IP1/AQP1/CRYAB/CDC42SE1/RDX/CSRNP3/CNN3	10
		GO:0019320	hexose catabolic process	3/181	56/18866	0.0165979	0.222916	0.202894	ENO2/TPI1/GPI	3
		GO:0043547	positive regulation of GTPase activity	9/181	406/18866	0.0167237	0.222916	0.202894	TIAM1/STXBP5L/CHN1/NF1/ARHGAP5/RAB3GAP1/MYO9A/SOS1/GIT1	9
		GO:0060996	dendritic spine development	4/181	102/18866	0.016819	0.222916	0.202894	TANC2/TIAM1/SLC12A5/CTNND2	4
		GO:0030073	insulin secretion	6/181	213/18866	0.0170116	0.222916	0.202894	TIAM1/STXBP5L/PPP3CA/HLA-DRB1/PRKCE/SYT7	6
		GO:0090276	regulation of peptide hormone secretion	6/181	213/18866	0.0170116	0.222916	0.202894	TIAM1/STXBP5L/PPP3CA/HLA-DRB1/PRKCE/SYT7	6
		GO:0035357	peroxisome proliferator activated receptor signaling pathway	2/181	21/18866	0.0170541	0.222916	0.202894	FAM120B/STARD10	2
		GO:0051957	positive regulation of amino acid transport	2/181	21/18866	0.0170541	0.222916	0.202894	ARL6IP1/RAB3GAP1	2
		GO:1903055	positive regulation of extracellular matrix organization	2/181	21/18866	0.0170541	0.222916	0.202894	RB1/PHLDB1	2
		GO:2000269	regulation of fibroblast apoptotic process	2/181	21/18866	0.0170541	0.222916	0.202894	CFDP1/API5	2
		GO:0046148	pigment biosynthetic process	3/181	57/18866	0.017399	0.22542	0.205173	SLC25A38/PGRMC1/HPRT1	3
		GO:0061178	regulation of insulin secretion involved in cellular response to glucose stimulus	3/181	57/18866	0.017399	0.22542	0.205173	TIAM1/HLA-DRB1/PRKCE	3
		GO:0090150	establishment of protein localization to membrane	8/181	342/18866	0.0176435	0.227586	0.207144	RPS6/ARL6IP1/RPL39/RPL7/UBA52/RPS26/RAB3GAP1/RPL30	8
		GO:0001824	blastocyst development	4/181	104/18866	0.0179343	0.229013	0.208443	ZPR1/STMN3/UBE2A/SKIL	4
		GO:0022613	ribonucleoprotein complex biogenesis	10/181	482/18866	0.0181775	0.229013	0.208443	RPS6/AGO3/CPSF7/EIF3I/PES1/RPL7/RBM5/EIF4H/MTREX/REXO4	10
		GO:1903311	regulation of mRNA metabolic process	8/181	344/18866	0.0182032	0.229013	0.208443	CPSF7/PSMB5/VIM/NOVA1/RBM5/UBA52/WTAP/IK	8
		GO:0007566	embryo implantation	3/181	58/18866	0.0182213	0.229013	0.208443	DDR1/CST3/SPP1	3
		GO:0046128	purine ribonucleoside metabolic process	3/181	58/18866	0.0182213	0.229013	0.208443	IMPDH2/HPRT1/AMPD3	3
		GO:1903793	positive regulation of anion transport	3/181	58/18866	0.0182213	0.229013	0.208443	ARL6IP1/MIF/RAB3GAP1	3
		GO:0071379	cellular response to prostaglandin stimulus	2/181	22/18866	0.0186426	0.232321	0.211454	PRKAA1/PRKCE	2
		GO:0071459	protein localization to chromosome, centromeric region	2/181	22/18866	0.0186426	0.232321	0.211454	RB1/IK	2
		GO:0007623	circadian rhythm	6/181	218/18866	0.0188425	0.23284	0.211927	NR2F6/IMPDH2/CST3/NTRK2/MYCBP2/PRKAA1	6
		GO:0036294	cellular response to decreased oxygen levels	6/181	218/18866	0.0188425	0.23284	0.211927	PSMB5/AQP1/UBA52/S100B/PRKAA1/PRKCE	6
		GO:0031663	lipopolysaccharide-mediated signaling pathway	3/181	59/18866	0.019065	0.234603	0.213532	MTDH/MIF/PRKCE	3
		GO:0099003	vesicle-mediated transport in synapse	6/181	220/18866	0.0196113	0.237751	0.216396	ERC2/STXBP5L/RAB3GAP1/SYT7/GIT1/EFNB2	6
		GO:0046651	lymphocyte proliferation	7/181	283/18866	0.0196493	0.237751	0.216396	IMPDH2/HLA-DPB1/NCK1/HLA-DRB1/MIF/HPRT1/SOS1	7
		GO:0034404	nucleobase-containing small molecule biosynthetic process	4/181	107/18866	0.0196919	0.237751	0.216396	IMPDH2/HPRT1/NUDT3/AMPD3	4
		GO:0016049	cell growth	10/181	490/18866	0.0201195	0.237751	0.216396	DDR1/ISLR2/TIAM1/CYFIP2/RB1/RPS6KA3/CRYAB/SPP1/DACT3/SEMA4F	10
		GO:0001956	positive regulation of neurotransmitter secretion	2/181	23/18866	0.0202909	0.237751	0.216396	RAB3GAP1/SYT7	2
		GO:0006783	heme biosynthetic process	2/181	23/18866	0.0202909	0.237751	0.216396	SLC25A38/PGRMC1	2
		GO:0015813	L-glutamate transmembrane transport	2/181	23/18866	0.0202909	0.237751	0.216396	ARL6IP1/SLC25A18	2
		GO:0042451	purine nucleoside biosynthetic process	2/181	23/18866	0.0202909	0.237751	0.216396	IMPDH2/HPRT1	2
		GO:0042455	ribonucleoside biosynthetic process	2/181	23/18866	0.0202909	0.237751	0.216396	IMPDH2/HPRT1	2
		GO:0046129	purine ribonucleoside biosynthetic process	2/181	23/18866	0.0202909	0.237751	0.216396	IMPDH2/HPRT1	2
		GO:0048791	calcium ion-regulated exocytosis of neurotransmitter	2/181	23/18866	0.0202909	0.237751	0.216396	RAB3GAP1/SYT7	2
		GO:1902254	negative regulation of intrinsic apoptotic signaling pathway by p53 class mediator	2/181	23/18866	0.0202909	0.237751	0.216396	MIF/RRM2B	2
		GO:0032943	mononuclear cell proliferation	7/181	286/18866	0.0206788	0.241028	0.219379	IMPDH2/HLA-DPB1/NCK1/HLA-DRB1/MIF/HPRT1/SOS1	7
		GO:0033013	tetrapyrrole metabolic process	3/181	61/18866	0.0208164	0.241028	0.219379	SLC25A38/PGRMC1/LMBRD1	3
		GO:0042278	purine nucleoside metabolic process	3/181	61/18866	0.0208164	0.241028	0.219379	IMPDH2/HPRT1/AMPD3	3
		GO:0009141	nucleoside triphosphate metabolic process	4/181	110/18866	0.0215523	0.245372	0.223333	CMPK1/IMPDH2/RRM2B/AMPD3	4
		GO:0002260	lymphocyte homeostasis	3/181	62/18866	0.0217242	0.245372	0.223333	MIF/SKIL/SOS1	3
		GO:0060997	dendritic spine morphogenesis	3/181	62/18866	0.0217242	0.245372	0.223333	TANC2/TIAM1/CTNND2	3
		GO:1902475	L-alpha-amino acid transmembrane transport	3/181	62/18866	0.0217242	0.245372	0.223333	SLC25A38/ARL6IP1/SLC25A18	3
		GO:2001244	positive regulation of intrinsic apoptotic signaling pathway	3/181	62/18866	0.0217242	0.245372	0.223333	NCK1/NUPR1/SKIL	3
		GO:0021544	subpallium development	2/181	24/18866	0.0219977	0.245372	0.223333	HPRT1/RARB	2
		GO:0034695	response to prostaglandin E	2/181	24/18866	0.0219977	0.245372	0.223333	PRKAA1/PRKCE	2
		GO:0044346	fibroblast apoptotic process	2/181	24/18866	0.0219977	0.245372	0.223333	CFDP1/API5	2
		GO:2000209	regulation of anoikis	2/181	24/18866	0.0219977	0.245372	0.223333	ANKRD13C/NTRK2	2
		GO:0032869	cellular response to insulin stimulus	6/181	226/18866	0.0220452	0.245372	0.223333	ATP6V1G1/HDAC9/NCK1/PRKAA1/ATP6V1A/SOS1	6
		GO:0097193	intrinsic apoptotic signaling pathway	7/181	290/18866	0.0221094	0.245372	0.223333	NCK1/SOD2/NUPR1/MIF/IVNS1ABP/SKIL/RRM2B	7
		GO:0031122	cytoplasmic microtubule organization	3/181	63/18866	0.0226533	0.250464	0.227967	STMN3/IFT172/FSD1	3
		GO:0048024	regulation of mRNA splicing, via spliceosome	4/181	113/18866	0.0235169	0.258828	0.235581	NOVA1/RBM5/WTAP/IK	4
		GO:0001947	heart looping	3/181	64/18866	0.0236038	0.258828	0.235581	NDRG4/IFT172/MESP1	3
		GO:0045109	intermediate filament organization	2/181	25/18866	0.0237619	0.258828	0.235581	GFAP/VIM	2
		GO:0046039	GTP metabolic process	2/181	25/18866	0.0237619	0.258828	0.235581	IMPDH2/AMPD3	2
		GO:0051146	striated muscle cell differentiation	7/181	295/18866	0.0239923	0.260374	0.236988	MYH9/RB1/HDAC9/PPP3CA/RARB/MESP1/EFNB2	7
		GO:0034614	cellular response to reactive oxygen species	5/181	170/18866	0.0241653	0.260652	0.23724	PLEKHA1/CST3/SOD2/AQP1/PRKAA1	5
		GO:0098693	regulation of synaptic vesicle cycle	4/181	114/18866	0.0241951	0.260652	0.23724	STXBP5L/RAB3GAP1/SYT7/GIT1	4
		GO:0035773	insulin secretion involved in cellular response to glucose stimulus	3/181	65/18866	0.0245757	0.263785	0.240092	TIAM1/HLA-DRB1/PRKCE	3
		GO:0043620	regulation of DNA-templated transcription in response to stress	4/181	115/18866	0.0248851	0.26601	0.242118	PSMB5/RPS6KA3/NCK1/UBA52	4
		GO:0009743	response to carbohydrate	6/181	233/18866	0.0251335	0.26601	0.242118	TIAM1/PPP3CA/CST3/HLA-DRB1/PRKAA1/PRKCE	6
		GO:0000910	cytokinesis	5/181	172/18866	0.0252553	0.26601	0.242118	MYH9/RAB11FIP4/FSD1/PRKCE/GIT1	5
		GO:1990138	neuron projection extension	5/181	172/18866	0.0252553	0.26601	0.242118	DDR1/ISLR2/TIAM1/CYFIP2/SEMA4F	5
		GO:0046365	monosaccharide catabolic process	3/181	66/18866	0.0255689	0.26601	0.242118	ENO2/TPI1/GPI	3
		GO:0033522	histone H2A ubiquitination	2/181	26/18866	0.0255821	0.26601	0.242118	BMI1/UBE2A	2
		GO:0046174	polyol catabolic process	2/181	26/18866	0.0255821	0.26601	0.242118	TPI1/NUDT3	2
		GO:0051156	glucose 6-phosphate metabolic process	2/181	26/18866	0.0255821	0.26601	0.242118	G6PC3/GPI	2
		GO:0007050	cell cycle arrest	6/181	234/18866	0.0255971	0.26601	0.242118	RB1/SOX2/CDC123/MIF/PRKAA1/SKIL	6
		GO:0000302	response to reactive oxygen species	6/181	235/18866	0.0260663	0.269463	0.24526	PLEKHA1/CST3/SOD2/AQP1/CRYAB/PRKAA1	6
		GO:0022407	regulation of cell-cell adhesion	9/181	439/18866	0.0261125	0.269463	0.24526	MBP/EFNB3/SOX2/HLA-DPB1/NCK1/HLA-DRB1/RDX/DENND6A/EFNB2	9
		GO:0009166	nucleotide catabolic process	3/181	67/18866	0.0265835	0.272412	0.247944	HPRT1/NUDT3/AMPD3	3
		GO:0032890	regulation of organic acid transport	3/181	67/18866	0.0265835	0.272412	0.247944	ARL6IP1/MIF/RAB3GAP1	3
		GO:0048588	developmental cell growth	6/181	237/18866	0.0270219	0.275942	0.251157	DDR1/ISLR2/TIAM1/CYFIP2/SPP1/SEMA4F	6
		GO:0006779	porphyrin-containing compound biosynthetic process	2/181	27/18866	0.0274571	0.277269	0.252365	SLC25A38/PGRMC1	2
		GO:0015949	nucleobase-containing small molecule interconversion	2/181	27/18866	0.0274571	0.277269	0.252365	CMPK1/RRM2B	2
		GO:0033014	tetrapyrrole biosynthetic process	2/181	27/18866	0.0274571	0.277269	0.252365	SLC25A38/PGRMC1	2
		GO:0016241	regulation of macroautophagy	5/181	176/18866	0.0275289	0.277269	0.252365	ATP6V1G1/NUPR1/RAB3GAP1/PRKAA1/ATP6V1A	5
		GO:2000116	regulation of cysteine-type endopeptidase activity	6/181	239/18866	0.0280005	0.280937	0.255704	CYFIP2/RPS6KA3/SOX2/ARL6IP1/AQP1/CRYAB	6
		GO:0048511	rhythmic process	7/181	305/18866	0.0280842	0.280937	0.255704	PLEKHA1/NR2F6/IMPDH2/CST3/NTRK2/MYCBP2/PRKAA1	7
		GO:0061371	determination of heart left/right asymmetry	3/181	69/18866	0.0286766	0.285226	0.259607	NDRG4/IFT172/MESP1	3
		GO:0048771	tissue remodeling	5/181	178/18866	0.028713	0.285226	0.259607	NF1/PPP3CA/CST3/SPP1/SYT7	5
		GO:0042063	gliogenesis	7/181	307/18866	0.028956	0.285226	0.259607	TIAM1/NF1/HEXB/SOX2/NTRK2/VIM/S100B	7
		GO:0000470	maturation of LSU-rRNA	2/181	28/18866	0.0293857	0.285226	0.259607	PES1/RPL7	2
		GO:0022011	myelination in peripheral nervous system	2/181	28/18866	0.0293857	0.285226	0.259607	NF1/NTRK2	2
		GO:0032292	peripheral nervous system axon ensheathment	2/181	28/18866	0.0293857	0.285226	0.259607	NF1/NTRK2	2
		GO:0044331	cell-cell adhesion mediated by cadherin	2/181	28/18866	0.0293857	0.285226	0.259607	DENND6A/CTNND1	2
		GO:0051590	positive regulation of neurotransmitter transport	2/181	28/18866	0.0293857	0.285226	0.259607	RAB3GAP1/SYT7	2
		GO:0090383	phagosome acidification	2/181	28/18866	0.0293857	0.285226	0.259607	ATP6V1G1/ATP6V1A	2
		GO:0003143	embryonic heart tube morphogenesis	3/181	70/18866	0.029755	0.285979	0.260292	NDRG4/IFT172/MESP1	3
		GO:0006879	cellular iron ion homeostasis	3/181	70/18866	0.029755	0.285979	0.260292	ATP6V1G1/FBXL5/ATP6V1A	3
		GO:0050771	negative regulation of axonogenesis	3/181	70/18866	0.029755	0.285979	0.260292	EFNB3/SPP1/SEMA4F	3
		GO:0018105	peptidyl-serine phosphorylation	7/181	310/18866	0.0302979	0.290248	0.264178	RPS6KA3/NCK1/NTRK2/MIF/CREBL2/PRKAA1/PRKCE	7
		GO:0007029	endoplasmic reticulum organization	3/181	71/18866	0.0308547	0.292856	0.266552	ATL2/ARL6IP1/RAB3GAP1	3
		GO:0051402	neuron apoptotic process	6/181	245/18866	0.031076	0.292856	0.266552	RB1/ZPR1/NF1/NTRK2/SOD2/NUPR1	6
		GO:0001782	B cell homeostasis	2/181	29/18866	0.0313668	0.292856	0.266552	MIF/SOS1	2
		GO:0001835	blastocyst hatching	2/181	29/18866	0.0313668	0.292856	0.266552	STMN3/UBE2A	2
		GO:0008209	androgen metabolic process	2/181	29/18866	0.0313668	0.292856	0.266552	PLEKHA1/SPP1	2
		GO:0035188	hatching	2/181	29/18866	0.0313668	0.292856	0.266552	STMN3/UBE2A	2
		GO:0036296	response to increased oxygen levels	2/181	29/18866	0.0313668	0.292856	0.266552	ATP6V1G1/ATP6V1A	2
		GO:0071684	organism emergence from protective structure	2/181	29/18866	0.0313668	0.292856	0.266552	STMN3/UBE2A	2
		GO:0070661	leukocyte proliferation	7/181	313/18866	0.0316812	0.294796	0.268317	IMPDH2/HLA-DPB1/NCK1/HLA-DRB1/MIF/HPRT1/SOS1	7
		GO:2001235	positive regulation of apoptotic signaling pathway	5/181	183/18866	0.0318129	0.294796	0.268317	NF1/NCK1/NUPR1/CTSC/SKIL	5
		GO:0009119	ribonucleoside metabolic process	3/181	72/18866	0.0319755	0.294796	0.268317	IMPDH2/HPRT1/AMPD3	3
		GO:0042440	pigment metabolic process	3/181	72/18866	0.0319755	0.294796	0.268317	SLC25A38/PGRMC1/HPRT1	3
		GO:0046879	hormone secretion	7/181	314/18866	0.0321516	0.295493	0.268952	TIAM1/STXBP5L/PPP3CA/SPP1/HLA-DRB1/PRKCE/SYT7	7
		GO:0090090	negative regulation of canonical Wnt signaling pathway	5/181	184/18866	0.0324571	0.297372	0.270662	PSMB5/SOX2/DACT3/MESP1/CTNND1	5
		GO:1901292	nucleoside phosphate catabolic process	3/181	73/18866	0.0331174	0.300387	0.273407	HPRT1/NUDT3/AMPD3	3
		GO:0003209	cardiac atrium morphogenesis	2/181	30/18866	0.0333991	0.300387	0.273407	SOS1/MESP1	2
		GO:0006884	cell volume homeostasis	2/181	30/18866	0.0333991	0.300387	0.273407	SLC12A5/AQP1	2
		GO:0035666	TRIF-dependent toll-like receptor signaling pathway	2/181	30/18866	0.0333991	0.300387	0.273407	UBA52/UBE2D2	2
		GO:0048147	negative regulation of fibroblast proliferation	2/181	30/18866	0.0333991	0.300387	0.273407	NF1/NUPR1	2
		GO:0062125	regulation of mitochondrial gene expression	2/181	30/18866	0.0333991	0.300387	0.273407	MTRES1/PRKAA1	2
		GO:0009306	protein secretion	9/181	462/18866	0.034549	0.309782	0.281958	TIAM1/STXBP5L/HDAC9/PPP3CA/HLA-DRB1/MIF/GPI/PRKCE/SYT7	9
		GO:0042692	muscle cell differentiation	8/181	390/18866	0.0348433	0.310569	0.282674	MYH9/RB1/HDAC9/PPP3CA/SOD2/RARB/MESP1/EFNB2	8
		GO:0035592	establishment of protein localization to extracellular region	9/181	463/18866	0.0349539	0.310569	0.282674	TIAM1/STXBP5L/HDAC9/PPP3CA/HLA-DRB1/MIF/GPI/PRKCE/SYT7	9
		GO:0030900	forebrain development	8/181	391/18866	0.0352913	0.310569	0.282674	NF1/SOX2/NTRK2/AQP1/HPRT1/RARB/RAB3GAP1/NPY	8
		GO:0008045	motor neuron axon guidance	2/181	31/18866	0.0354815	0.310569	0.282674	CHN1/MYCBP2	2
		GO:0014044	Schwann cell development	2/181	31/18866	0.0354815	0.310569	0.282674	NF1/NTRK2	2
		GO:0045948	positive regulation of translational initiation	2/181	31/18866	0.0354815	0.310569	0.282674	NCK1/CDC123	2
		GO:0060325	face morphogenesis	2/181	31/18866	0.0354815	0.310569	0.282674	PLEKHA1/RAB3GAP1	2
		GO:1902253	regulation of intrinsic apoptotic signaling pathway by p53 class mediator	2/181	31/18866	0.0354815	0.310569	0.282674	MIF/RRM2B	2
		GO:0030308	negative regulation of cell growth	5/181	190/18866	0.0364932	0.317096	0.288615	RB1/CRYAB/SPP1/DACT3/SEMA4F	5
		GO:0070507	regulation of microtubule cytoskeleton organization	5/181	190/18866	0.0364932	0.317096	0.288615	STMN3/FSD1/STMN2/PHLDB1/PRKAA1	5
		GO:0009914	hormone transport	7/181	323/18866	0.0365968	0.317096	0.288615	TIAM1/STXBP5L/PPP3CA/SPP1/HLA-DRB1/PRKCE/SYT7	7
		GO:0031346	positive regulation of cell projection organization	8/181	394/18866	0.0366585	0.317096	0.288615	NDRG4/ISLR2/TIAM1/NCK1/NTRK2/DPYSL3/STMN2/SKIL	8
		GO:0048167	regulation of synaptic plasticity	5/181	191/18866	0.0371946	0.320334	0.291562	NF1/NTRK2/S100B/RAB3GAP1/SYT7	5
		GO:0048872	homeostasis of number of cells	6/181	256/18866	0.0372715	0.320334	0.291562	SLC25A38/RB1/MIF/SKIL/SOS1/AMPD3	6
		GO:0034694	response to prostaglandin	2/181	32/18866	0.0376129	0.320334	0.291562	PRKAA1/PRKCE	2
		GO:0042168	heme metabolic process	2/181	32/18866	0.0376129	0.320334	0.291562	SLC25A38/PGRMC1	2
		GO:0048741	skeletal muscle fiber development	2/181	32/18866	0.0376129	0.320334	0.291562	HDAC9/PPP3CA	2
		GO:0030072	peptide hormone secretion	6/181	257/18866	0.0378711	0.320334	0.291562	TIAM1/STXBP5L/PPP3CA/HLA-DRB1/PRKCE/SYT7	6
		GO:0071692	protein localization to extracellular region	9/181	470/18866	0.0378804	0.320334	0.291562	TIAM1/STXBP5L/HDAC9/PPP3CA/HLA-DRB1/MIF/GPI/PRKCE/SYT7	9
		GO:0021953	central nervous system neuron differentiation	5/181	192/18866	0.0379042	0.320334	0.291562	IFT172/NTRK2/MYCBP2/HPRT1/NPY	5
		GO:0021537	telencephalon development	6/181	259/18866	0.0390889	0.328898	0.299357	NF1/NTRK2/AQP1/HPRT1/RARB/NPY	6
		GO:0072332	intrinsic apoptotic signaling pathway by p53 class mediator	3/181	78/18866	0.0391412	0.328898	0.299357	NUPR1/MIF/RRM2B	3
		GO:0034470	ncRNA processing	8/181	400/18866	0.0394995	0.330589	0.300896	RPS6/AGO3/FAM98B/RTRAF/PES1/RPL7/MTREX/REXO4	8
		GO:0045879	negative regulation of smoothened signaling pathway	2/181	33/18866	0.0397921	0.330589	0.300896	RB1/IFT172	2
		GO:0046627	negative regulation of insulin receptor signaling pathway	2/181	33/18866	0.0397921	0.330589	0.300896	NCK1/PRKAA1	2
		GO:1901797	negative regulation of signal transduction by p53 class mediator	2/181	33/18866	0.0397921	0.330589	0.300896	MIF/RRM2B	2
		GO:0006446	regulation of translational initiation	3/181	79/18866	0.0404083	0.333823	0.303839	NCK1/CDC123/EIF4H	3
		GO:0007492	endoderm development	3/181	79/18866	0.0404083	0.333823	0.303839	SSBP3/SOX2/MESP1	3
		GO:0048565	digestive tract development	4/181	135/18866	0.0411988	0.337637	0.30731	RB1/IFT172/RARB/NPY	4
		GO:0009749	response to glucose	5/181	197/18866	0.0415767	0.337637	0.30731	TIAM1/PPP3CA/HLA-DRB1/PRKAA1/PRKCE	5
		GO:0035050	embryonic heart tube development	3/181	80/18866	0.041696	0.337637	0.30731	NDRG4/IFT172/MESP1	3
		GO:0048678	response to axon injury	3/181	80/18866	0.041696	0.337637	0.30731	CST3/DPYSL3/SPP1	3
		GO:0018209	peptidyl-serine modification	7/181	333/18866	0.0419926	0.337637	0.30731	RPS6KA3/NCK1/NTRK2/MIF/CREBL2/PRKAA1/PRKCE	7
		GO:0035633	maintenance of blood-brain barrier	2/181	34/18866	0.042018	0.337637	0.30731	MBP/CLDN12	2
		GO:0043094	cellular metabolic compound salvage	2/181	34/18866	0.042018	0.337637	0.30731	HPRT1/AMPD3	2
		GO:0043276	anoikis	2/181	34/18866	0.042018	0.337637	0.30731	ANKRD13C/NTRK2	2
		GO:0048854	brain morphogenesis	2/181	34/18866	0.042018	0.337637	0.30731	NF1/SOS1	2
		GO:0060795	cell fate commitment involved in formation of primary germ layer	2/181	34/18866	0.042018	0.337637	0.30731	SOX2/MESP1	2
		GO:0045727	positive regulation of translation	4/181	136/18866	0.0421415	0.337706	0.307374	NCK1/VIM/CDC123/RPL30	4
		GO:0007626	locomotory behavior	5/181	198/18866	0.0423362	0.338344	0.307954	EFNB3/HEXB/NOVA1/HPRT1/PRKCE	5
		GO:0099504	synaptic vesicle cycle	5/181	199/18866	0.043104	0.343547	0.31269	ERC2/STXBP5L/RAB3GAP1/SYT7/GIT1	5
		GO:0000083	regulation of transcription involved in G1/S transition of mitotic cell cycle	2/181	35/18866	0.0442896	0.346425	0.31531	RB1/ZPR1	2
		GO:0009112	nucleobase metabolic process	2/181	35/18866	0.0442896	0.346425	0.31531	CMPK1/HPRT1	2
		GO:0014904	myotube cell development	2/181	35/18866	0.0442896	0.346425	0.31531	HDAC9/PPP3CA	2
		GO:0032228	regulation of synaptic transmission, GABAergic	2/181	35/18866	0.0442896	0.346425	0.31531	NF1/PRKCE	2
		GO:0070306	lens fiber cell differentiation	2/181	35/18866	0.0442896	0.346425	0.31531	VIM/SKIL	2
		GO:0097009	energy homeostasis	2/181	35/18866	0.0442896	0.346425	0.31531	PRKAA1/AMPD3	2
		GO:1900077	negative regulation of cellular response to insulin stimulus	2/181	35/18866	0.0442896	0.346425	0.31531	NCK1/PRKAA1	2
		GO:0002221	pattern recognition receptor signaling pathway	5/181	201/18866	0.0446647	0.347836	0.316594	SEC14L1/RPS6KA3/UBA52/UBE2D2/PRKCE	5
		GO:0050769	positive regulation of neurogenesis	9/181	485/18866	0.0447066	0.347836	0.316594	NDRG4/ISLR2/TIAM1/NCK1/NTRK2/DPYSL3/RARB/STMN2/SKIL	9
		GO:0002433	immune response-regulating cell surface receptor signaling pathway involved in phagocytosis	4/181	139/18866	0.0450427	0.348607	0.317295	CYFIP2/NCK1/PRKCE/ABI1	4
		GO:0038096	Fc-gamma receptor signaling pathway involved in phagocytosis	4/181	139/18866	0.0450427	0.348607	0.317295	CYFIP2/NCK1/PRKCE/ABI1	4
		GO:0009746	response to hexose	5/181	202/18866	0.0454576	0.349871	0.318446	TIAM1/PPP3CA/HLA-DRB1/PRKAA1/PRKCE	5
		GO:0043312	neutrophil degranulation	9/181	487/18866	0.0456752	0.349871	0.318446	PGRMC1/IMPDH2/HEXB/CST3/CD63/MIF/CTSC/GPI/AMPD3	9
		GO:0002088	lens development in camera-type eye	3/181	83/18866	0.0456818	0.349871	0.318446	VIM/CRYAB/SKIL	3
		GO:0048708	astrocyte differentiation	3/181	83/18866	0.0456818	0.349871	0.318446	NF1/VIM/S100B	3
		GO:0000460	maturation of 5.8S rRNA	2/181	36/18866	0.0466058	0.351456	0.319888	PES1/MTREX	2
		GO:0003230	cardiac atrium development	2/181	36/18866	0.0466058	0.351456	0.319888	SOS1/MESP1	2
		GO:0033280	response to vitamin D	2/181	36/18866	0.0466058	0.351456	0.319888	GDAP1/SPP1	2
		GO:0033572	transferrin transport	2/181	36/18866	0.0466058	0.351456	0.319888	ATP6V1G1/ATP6V1A	2
		GO:0046676	negative regulation of insulin secretion	2/181	36/18866	0.0466058	0.351456	0.319888	STXBP5L/PPP3CA	2
		GO:0051955	regulation of amino acid transport	2/181	36/18866	0.0466058	0.351456	0.319888	ARL6IP1/RAB3GAP1	2
		GO:0097061	dendritic spine organization	3/181	84/18866	0.047051	0.353778	0.322002	TANC2/TIAM1/CTNND2	3
		GO:0002283	neutrophil activation involved in immune response	9/181	490/18866	0.0471543	0.353778	0.322002	PGRMC1/IMPDH2/HEXB/CST3/CD63/MIF/CTSC/GPI/AMPD3	9
		GO:0038094	Fc-gamma receptor signaling pathway	4/181	142/18866	0.0480531	0.359603	0.327304	CYFIP2/NCK1/PRKCE/ABI1	4
		GO:0032941	secretion by tissue	2/181	37/18866	0.0489656	0.363656	0.330993	AQP1/PRKCE	2
		GO:0048048	embryonic eye morphogenesis	2/181	37/18866	0.0489656	0.363656	0.330993	IFT172/RARB	2
		GO:2000785	regulation of autophagosome assembly	2/181	37/18866	0.0489656	0.363656	0.330993	NUPR1/RAB3GAP1	2
		GO:0034284	response to monosaccharide	5/181	207/18866	0.0495483	0.367057	0.334088	TIAM1/PPP3CA/HLA-DRB1/PRKAA1/PRKCE	5
		GO:0001776	leukocyte homeostasis	3/181	86/18866	0.0498495	0.36836	0.335274	MIF/SKIL/SOS1	3

## Sheet: Aβ_down_level 3
DEGs in this data sheet were identified by comparing genes in Aβ positive spots with genes in its level 3 spots, which are 245 µm away from Aβ positive spots. All the DEGs in this data sheet were significantly downregulated in Aβ positive spots than in level 3 spots. The pathway analysis was performed as previously described. Top pathways of interest with significance (adjust p value is less than…
		GO enrichment analysis									KEGG pathway analysis									Reactome analysis
Gene	sample	ID	Description	GeneRatio	BgRatio	pvalue	p.adjust	qvalue	geneID	Count	ID	Description	GeneRatio	BgRatio	pvalue	p.adjust	qvalue	geneID	Count	ID	Description	GeneRatio	BgRatio	pvalue	p.adjust	qvalue	geneID	Count
SNHG7	Aβ_down	GO:0016236	macroautophagy	21/448	310/18866	1.78969e-05	0.0287541	0.0272415	RUBCNL/VPS37A/DDRGK1/SNAPIN/GABARAPL1/PRKAG1/SNX32/ATP6V0E2/TP53INP2/ATG9A/PRKAB2/LAMTOR3/CLN3/PIP4K2A/USP30/PIP4K2C/TSC1/LAMTOR1/VPS26B/VPS25/RRAGB	21	hsa04152	AMPK signaling pathway	10/206	120/8111	0.00091658	0.235561	0.227698	SCD/PPP2R5E/RAB2A/PRKAG1/PPP2R5C/PRKAB2/PPP2R5D/CPT1A/TSC1/TBC1D1	10	R-HSA-380972	Energy dependent regulation of mTOR by LKB1-AMPK	6/292	29/10704	0.000109503	0.102222	0.0979249	PRKAG1/PRKAB2/LAMTOR3/TSC1/LAMTOR1/RRAGB	6
UBR2	Aβ_down	GO:1990542	mitochondrial transmembrane transport	11/448	101/18866	2.78885e-05	0.0287541	0.0272415	MID1IP1/SLC25A18/CHCHD4/SLC25A12/MCUR1/PRKAB2/MICU1/GRPEL1/CPT1A/TIMM44/SFXN3	11	hsa04144	Endocytosis	15/206	252/8111	0.0018525	0.238046	0.2301	VPS37A/GIT2/AGAP1/PIP5K1A/TFRC/RAB22A/SNX32/ARPC3/EPS15L1/CLTB/AMPH/ARFGAP2/VPS26B/VPS25/FGFR2	15	R-HSA-9006925	Intracellular signaling by second messengers	20/292	306/10704	0.000270395	0.102222	0.0979249	ITPR3/PSMB4/MET/MOV10/CAMK4/PPP2R5E/MTA2/PIP5K1A/PPP2R5C/LAMTOR3/MTA3/PPP2R5D/GSK3A/PIP4K2A/PIP4K2C/LAMTOR1/HDAC3/PHLPP1/FGFR2/RRAGB	20
IGFL4	Aβ_down	GO:0006839	mitochondrial transport	19/448	271/18866	2.78955e-05	0.0287541	0.0272415	TIMM13/MID1IP1/CNP/SLC25A18/BCL2L2/VPS11/CHCHD4/SLC25A12/MCUR1/PRKAB2/MICU1/GRPEL1/GSK3A/SAE1/CPT1A/TIMM44/UBE2D3/SFXN3/RHOT1	19	hsa04728	Dopaminergic synapse	9/206	132/8111	0.00633424	0.433649	0.419173	ITPR3/PPP2R5E/GRIN2A/PPP2R5C/PPP2R5D/GSK3A/PPP1R1B/GNG3/PPP1CB	9	R-HSA-1257604	PIP3 activates AKT signaling	18/292	264/10704	0.000328336	0.102222	0.0979249	PSMB4/MET/MOV10/PPP2R5E/MTA2/PIP5K1A/PPP2R5C/LAMTOR3/MTA3/PPP2R5D/GSK3A/PIP4K2A/PIP4K2C/LAMTOR1/HDAC3/PHLPP1/FGFR2/RRAGB	18
NANS	Aβ_down	GO:0050804	modulation of chemical synaptic transmission	26/448	454/18866	3.5426e-05	0.0287541	0.0272415	NPTX1/ITPR3/SNAP47/ABL1/NPTXR/MAP1B/MECP2/EIF4EBP2/SNAPIN/TMEM25/NPY2R/DTNBP1/ABR/RAB3A/CACNG7/ATP2A2/CALB2/GRIN2A/PRRT2/SEPTIN5/OXTR/DGKB/CLN3/GRM2/UCN/RHOT1	26	hsa00520	Amino sugar and nucleotide sugar metabolism	5/206	48/8111	0.00710172	0.433649	0.419173	NANS/GCK/AMDHD2/UGP2/HK1	5	R-HSA-165159	MTOR signalling	6/292	41/10704	0.000787596	0.158819	0.152143	PRKAG1/PRKAB2/LAMTOR3/TSC1/LAMTOR1/RRAGB	6
HIP1	Aβ_down	GO:0099177	regulation of trans-synaptic signaling	26/448	455/18866	3.67606e-05	0.0287541	0.0272415	NPTX1/ITPR3/SNAP47/ABL1/NPTXR/MAP1B/MECP2/EIF4EBP2/SNAPIN/TMEM25/NPY2R/DTNBP1/ABR/RAB3A/CACNG7/ATP2A2/CALB2/GRIN2A/PRRT2/SEPTIN5/OXTR/DGKB/CLN3/GRM2/UCN/RHOT1	26	hsa00510	N-Glycan biosynthesis	5/206	50/8111	0.00843675	0.433649	0.419173	MAN2A1/MAN1A1/ALG12/GANAB/MGAT1	5	R-HSA-9612973	Autophagy	12/292	151/10704	0.000866205	0.158819	0.152143	VPS37A/DYNC1I1/GABARAPL1/PRKAG1/ATG9A/PRKAB2/LAMTOR3/USP30/TSC1/LAMTOR1/RNASE1/RRAGB	12
NPTX1	Aβ_down	GO:0016241	regulation of macroautophagy	13/448	176/18866	0.000305889	0.199388	0.1889	PRKAG1/SNX32/ATP6V0E2/PRKAB2/LAMTOR3/CLN3/PIP4K2A/USP30/PIP4K2C/TSC1/LAMTOR1/VPS26B/RRAGB	13	hsa04070	Phosphatidylinositol signaling system	7/206	97/8111	0.0115001	0.492588	0.476145	ITPR3/PIP5K1A/MTMR1/DGKB/ITPKC/PIP4K2A/PIP4K2C	7	R-HSA-5675221	Negative regulation of MAPK pathway	6/292	43/10704	0.00102025	0.158819	0.152143	PPP2R5E/PEBP1/PTPN3/PPP2R5C/PPP2R5D/DUSP16	6
AC025181.2	Aβ_down	GO:0048284	organelle fusion	11/448	140/18866	0.000521151	0.291175	0.275857	RUBCNL/SNAP47/SNAPIN/TFRC/VPS11/RAB3A/PID1/PRRT2/CLN3/USP30/MIGA1	11	hsa01212	Fatty acid metabolism	5/206	57/8111	0.0144637	0.531026	0.5133	SCD/ACAT1/ELOVL7/CPT1A/HADHA	5	R-HSA-8986944	Transcriptional Regulation by MECP2	7/292	62/10704	0.0014244	0.167353	0.160318	MET/MOV10/CAMK4/HIPK2/MECP2/GRIN2A/HDAC3	7
MS4A4A	Aβ_down	GO:0010506	regulation of autophagy	19/448	347/18866	0.000679615	0.314055	0.297534	MET/ABL1/PRKAG1/SNX32/ATP6V0E2/TP53INP2/PRKAB2/LAMTOR3/GSK3A/SOGA3/EP300/CLN3/PIP4K2A/USP30/PIP4K2C/TSC1/LAMTOR1/VPS26B/RRAGB	19	hsa00513	Various types of N-glycan biosynthesis	4/206	39/8111	0.0165965	0.533162	0.515364	MAN2A1/MAN1A1/ALG12/MGAT1	4	R-HSA-5633007	Regulation of TP53 Activity	12/292	160/10704	0.00143343	0.167353	0.160318	CCNG1/MTA2/HIPK2/TAF13/PRKAG1/PPP2R5C/PRKAB2/EP300/MRE11/PIP4K2A/PIP4K2C/JMY	12
CCNG1	Aβ_down	GO:0010761	fibroblast migration	6/448	46/18866	0.00072646	0.314055	0.297534	MTA2/FER/CCN3/PIP5K1A/PAK3/CLN3	6	hsa04720	Long-term potentiation	5/206	67/8111	0.0272628	0.545149	0.526951	ITPR3/CAMK4/GRIN2A/EP300/PPP1CB	5	R-HSA-9022692	Regulation of MECP2 expression and activity	5/292	33/10704	0.00185075	0.176147	0.168742	MOV10/CAMK4/HIPK2/MECP2/HDAC3	5
NALCN	Aβ_down	GO:0030258	lipid modification	16/448	271/18866	0.000803004	0.314055	0.297534	PLPP4/SGPP2/ACAT1/PIP5K1A/MTMR1/MBOAT7/DGKB/ITPKC/PIP4K2A/CPT1A/PIP4K2C/LAMTOR1/PLPPR3/HADHA/ECHDC1/PLPP2	16	hsa04137	Mitophagy - animal	5/206	68/8111	0.0288408	0.545149	0.526951	GABARAPL1/ATG9A/USP30/TBC1D17/RHOT1	5	R-HSA-8856828	Clathrin-mediated endocytosis	11/292	146/10704	0.0021605	0.176147	0.168742	HIP1/CD4/TFRC/ARPC3/NEDD8/EPS15L1/ITSN2/CLTB/AMPH/COPS3/KIAA0319	11
TIMM13	Aβ_down	GO:0050890	cognition	17/448	302/18866	0.000947602	0.331956	0.314493	ITPR3/FGF13/CAMK4/FOXO6/TTC8/GPR155/MECP2/EIF4EBP2/GABRA5/GRIN2A/OXTR/EP300/CLN3/MAGT1/SHC3/UCN/PPP1R1B	17	hsa05031	Amphetamine addiction	5/206	69/8111	0.0304754	0.545149	0.526951	CAMK4/PDYN/GRIN2A/PPP1R1B/PPP1CB	5	R-HSA-3700989	Transcriptional Regulation by TP53	20/292	365/10704	0.00239569	0.176147	0.168742	CCNG1/RGCC/COX7C/MOV10/MTA2/HIPK2/TAF13/PRKAG1/PPP2R5C/PRKAB2/LAMTOR3/EP300/MRE11/PIP4K2A/PIP4K2C/TSC1/LAMTOR1/CDK9/JMY/RRAGB	20
SEC11A	Aβ_down	GO:0050905	neuromuscular process	9/448	107/18866	0.00101853	0.331956	0.314493	NKX6-2/ABL1/ADARB1/MECP2/ABR/GRIN2A/PRRT2/CLN3/UCN	9	hsa00565	Ether lipid metabolism	4/206	49/8111	0.0351883	0.545149	0.526951	UGT8/PAFAH1B3/ENPP2/PLPP2	4	R-HSA-5628897	TP53 Regulates Metabolic Genes	8/292	87/10704	0.00251908	0.176147	0.168742	COX7C/MOV10/PRKAG1/PRKAB2/LAMTOR3/TSC1/LAMTOR1/RRAGB	8
ZNF174	Aβ_down	GO:0010977	negative regulation of neuron projection development	11/448	154/18866	0.00114951	0.345825	0.327633	FGF13/CBFA2T2/SEMA4D/SNAPIN/SEMA3D/BCL11A/GSK3A/LRIG2/TSC1/PRAG1/KIAA0319	11	hsa05030	Cocaine addiction	4/206	49/8111	0.0351883	0.545149	0.526951	PDYN/GRIN2A/GRM2/PPP1R1B	4	R-HSA-5576891	Cardiac conduction	10/292	129/10704	0.00275929	0.176147	0.168742	ITPR3/FGF13/KCNIP1/HIPK2/ATP1B1/KCNIP2/CACNG7/ATP2A2/STIM1/CACNB1	10
MMAB	Aβ_down	GO:0006650	glycerophospholipid metabolic process	18/448	343/18866	0.00150255	0.348382	0.330055	SERAC1/PGAP3/MECP2/PIP5K1A/MTMR1/LPIN2/MBOAT7/PISD/DGKB/ITPKC/CLN3/PIP4K2A/PIP4K2C/PLEKHA3/SERINC3/FAR1/HADHA/ENPP2	18	hsa03040	Spliceosome	8/206	150/8111	0.0370338	0.545149	0.526951	DHX15/PLRG1/PQBP1/RBMXL1/SF3B3/SYF2/SNRPG/SRSF6	8	R-HSA-199418	Negative regulation of the PI3K/AKT network	9/292	110/10704	0.00309108	0.176147	0.168742	MET/PPP2R5E/PIP5K1A/PPP2R5C/PPP2R5D/PIP4K2A/PIP4K2C/PHLPP1/FGFR2	9
ITPR3	Aβ_down	GO:0032481	positive regulation of type I interferon production	7/448	74/18866	0.00185837	0.348382	0.330055	TLR4/POLR3B/POLR3A/PQBP1/EP300/MRE11/LRRFIP1	7	hsa04261	Adrenergic signaling in cardiomyocytes	8/206	150/8111	0.0370338	0.545149	0.526951	PPP2R5E/ATP1B1/CACNG7/ATP2A2/PPP2R5C/PPP2R5D/CACNB1/PPP1CB	8	R-HSA-6811442	Intra-Golgi and retrograde Golgi-to-ER traffic	13/292	202/10704	0.00359373	0.176147	0.168742	BET1L/MAN2A1/COG4/MAN1A1/DYNC1I1/NAA35/PAFAH1B3/RAB9A/RAB6B/NBAS/RAB30/SURF4/ARFGAP2	13
MAN1B1-DT	Aβ_down	GO:0006006	glucose metabolic process	13/448	214/18866	0.00187929	0.348382	0.330055	ALDOA/RUBCNL/GCK/SLC25A11/SLC25A12/GOT1/ARPP19/GSK3A/EP300/CPT1A/HK1/PPP1CB/NCOA2	13	hsa00562	Inositol phosphate metabolism	5/206	73/8111	0.0375907	0.545149	0.526951	PIP5K1A/MTMR1/ITPKC/PIP4K2A/PIP4K2C	5	R-HSA-1632852	Macroautophagy	10/292	136/10704	0.0040394	0.176147	0.168742	DYNC1I1/GABARAPL1/PRKAG1/ATG9A/PRKAB2/LAMTOR3/USP30/TSC1/LAMTOR1/RRAGB	10
PSMB4	Aβ_down	GO:0006853	carnitine shuttle	3/448	11/18866	0.001904	0.348382	0.330055	MID1IP1/PRKAB2/CPT1A	3	hsa00564	Glycerophospholipid metabolism	6/206	98/8111	0.0381816	0.545149	0.526951	PLPP4/LPIN2/MBOAT7/MBOAT7/MBOAT7/MBOAT7/MBOAT7/MBOAT7/MBOAT7/MBOAT7/MBOAT7/MBOAT7/PISD/DGKB/PLPP2	6	R-HSA-200425	Carnitine metabolism	3/292	14/10704	0.00585	0.176147	0.168742	MID1IP1/PRKAB2/CPT1A	3
HTR1E	Aβ_down	GO:0070778	L-aspartate transmembrane transport	3/448	11/18866	0.001904	0.348382	0.330055	SLC25A18/SLC25A12/SLC1A2	3	hsa03015	mRNA surveillance pathway	6/206	98/8111	0.0381816	0.545149	0.526951	PPP2R5E/HBS1L/SRRM1/PPP2R5C/PPP2R5D/PPP1CB	6	R-HSA-4839735	AXIN mutants destabilize the destruction complex, activating WNT signaling	3/292	14/10704	0.00585	0.176147	0.168742	PPP2R5E/PPP2R5C/PPP2R5D	3
DIPK1B	Aβ_down	GO:0031629	synaptic vesicle fusion to presynaptic active zone membrane	4/448	23/18866	0.00194143	0.348382	0.330055	SNAP47/SNAPIN/RAB3A/PRRT2	4	hsa04921	Oxytocin signaling pathway	8/206	154/8111	0.0422215	0.553568	0.535089	ITPR3/CAMK4/PRKAG1/CACNG7/PRKAB2/OXTR/CACNB1/PPP1CB	8	R-HSA-4839744	truncated APC mutants destabilize the destruction complex	3/292	14/10704	0.00585	0.176147	0.168742	PPP2R5E/PPP2R5C/PPP2R5D	3
ARSK	Aβ_down	GO:0009225	nucleotide-sugar metabolic process	5/448	38/18866	0.00194255	0.348382	0.330055	NANS/AMDHD2/UGP2/GSK3A/MGAT1	5	hsa00052	Galactose metabolism	3/206	31/8111	0.0430792	0.553568	0.535089	GCK/UGP2/HK1	3	R-HSA-4839748	AMER1 mutants destabilize the destruction complex	3/292	14/10704	0.00585	0.176147	0.168742	PPP2R5E/PPP2R5C/PPP2R5D	3
MTRNR2L1	Aβ_down	GO:0030308	negative regulation of cell growth	12/448	190/18866	0.00200801	0.348382	0.330055	FGF13/CCN3/SEMA4D/SEMA3D/PTPRJ/NDRG3/ING1/BCL11A/FHL1/GSK3A/CRYAB/KIAA0319	12	hsa04721	Synaptic vesicle cycle	5/206	78/8111	0.0478089	0.58509	0.565559	ATP6V1F/RAB3A/ATP6V0E2/CLTB/SLC1A2	5	R-HSA-5467337	APC truncation mutants have impaired AXIN binding	3/292	14/10704	0.00585	0.176147	0.168742	PPP2R5E/PPP2R5C/PPP2R5D	3
MRPL47	Aβ_down	GO:0050432	catecholamine secretion	6/448	57/18866	0.00226099	0.348382	0.330055	MECP2/NPY2R/DTNBP1/RAB3A/OXTR/ADRA2C	6										R-HSA-5467340	AXIN missense mutants destabilize the destruction complex	3/292	14/10704	0.00585	0.176147	0.168742	PPP2R5E/PPP2R5C/PPP2R5D	3
TSEN54	Aβ_down	GO:0001933	negative regulation of protein phosphorylation	21/448	444/18866	0.00227634	0.348382	0.330055	TLR4/DBNDD2/ABL1/RNF149/SEMA4D/ADARB1/DUSP22/FBLN1/PEBP1/C3orf33/EIF3A/DTNBP1/SRCIN1/PTPRJ/PID1/PPP2R5D/IBTK/PPP1R1B/HDAC3/DUSP16/VPS25	21										R-HSA-5467348	Truncations of AMER1 destabilize the destruction complex	3/292	14/10704	0.00585	0.176147	0.168742	PPP2R5E/PPP2R5C/PPP2R5D	3
ANKRD33B	Aβ_down	GO:0099500	vesicle fusion to plasma membrane	4/448	24/18866	0.0022865	0.348382	0.330055	SNAP47/SNAPIN/RAB3A/PRRT2	4										R-HSA-9005891	Loss of function of MECP2 in Rett syndrome	3/292	14/10704	0.00585	0.176147	0.168742	CAMK4/MECP2/HDAC3	3
FGF13	Aβ_down	GO:0007613	memory	9/448	121/18866	0.00240171	0.348382	0.330055	ITPR3/FGF13/CAMK4/FOXO6/MECP2/EIF4EBP2/GRIN2A/OXTR/PPP1R1B	9										R-HSA-9005895	Pervasive developmental disorders	3/292	14/10704	0.00585	0.176147	0.168742	CAMK4/MECP2/HDAC3	3
AL583827.1	Aβ_down	GO:0002209	behavioral defense response	5/448	40/18866	0.00244967	0.348382	0.330055	MECP2/NPY2R/GABRA5/EP300/UCN	5										R-HSA-9675151	Disorders of Developmental Biology	3/292	14/10704	0.00585	0.176147	0.168742	CAMK4/MECP2/HDAC3	3
MET	Aβ_down	GO:0006626	protein targeting to mitochondrion	8/448	99/18866	0.00247007	0.348382	0.330055	TIMM13/VPS11/CHCHD4/GRPEL1/GSK3A/SAE1/TIMM44/UBE2D3	8										R-HSA-9697154	Disorders of Nervous System Development	3/292	14/10704	0.00585	0.176147	0.168742	CAMK4/MECP2/HDAC3	3
FAM229B	Aβ_down	GO:0046689	response to mercury ion	3/448	12/18866	0.00249417	0.348382	0.330055	ALAD/BSG/UBE2D3	3										R-HSA-8943724	Regulation of PTEN gene transcription	6/292	61/10704	0.00617681	0.176147	0.168742	MTA2/LAMTOR3/MTA3/LAMTOR1/HDAC3/RRAGB	6
TTLL11	Aβ_down	GO:0015740	C4-dicarboxylate transport	4/448	25/18866	0.00267157	0.349593	0.331203	SLC25A18/SLC25A11/SLC25A12/SLC1A2	4										R-HSA-6811438	Intra-Golgi traffic	5/292	44/10704	0.00663862	0.176147	0.168742	BET1L/MAN2A1/COG4/MAN1A1/RAB30	5
CCDC171	Aβ_down	GO:0099504	synaptic vesicle cycle	12/448	199/18866	0.00294198	0.349593	0.331203	SNAP47/SNAPIN/SYN2/DTNBP1/STXBP5/RAB3A/ATP2A2/PRRT2/SEPTIN5/ITSN2/AMPH/MX1	12										R-HSA-9694635	Translation of structural proteins	5/292	44/10704	0.00663862	0.176147	0.168742	MAN2A1/UBE2I/MAGT1/GANAB/MGAT1	5
AP001160.3	Aβ_down	GO:0006644	phospholipid metabolic process	21/448	455/18866	0.00303532	0.349593	0.331203	PLPP4/SERAC1/PGAP3/MECP2/PIP5K1A/MTMR1/LPIN2/MBOAT7/PISD/DGKB/ITPKC/CLN3/PIP4K2A/PIP4K2C/PLEKHA3/SERINC3/FAR1/PLPPR3/HADHA/ENPP2/PLPP2	21										R-HSA-9679506	SARS-CoV Infections	10/292	147/10704	0.00695382	0.176147	0.168742	MAN2A1/HMG20B/MTA2/ATP1B1/UBE2I/MTA3/GSK3A/MAGT1/GANAB/MGAT1	10
RGCC	Aβ_down	GO:0060384	innervation	4/448	26/18866	0.00309884	0.349593	0.331203	NPTX1/ADARB1/GABRA5/LRIG2	4										R-HSA-6811558	PI5P, PP2A and IER3 Regulate PI3K/AKT Signaling	8/292	103/10704	0.00706054	0.176147	0.168742	MET/PPP2R5E/PIP5K1A/PPP2R5C/PPP2R5D/PIP4K2A/PIP4K2C/FGFR2	8
HPCAL4	Aβ_down	GO:0019318	hexose metabolic process	14/448	254/18866	0.00313579	0.349593	0.331203	ALDOA/RUBCNL/GCK/MAN2A1/SLC25A11/SLC25A12/GOT1/ARPP19/GSK3A/EP300/CPT1A/HK1/PPP1CB/NCOA2	14										R-HSA-4839743	phosphorylation site mutants of CTNNB1 are not targeted to the proteasome by the destruction complex	3/292	15/10704	0.00716656	0.176147	0.168742	PPP2R5E/PPP2R5C/PPP2R5D	3
RBAK	Aβ_down	GO:0032096	negative regulation of response to food	3/448	13/18866	0.00318566	0.349593	0.331203	NUCB2/BBS2/UCN	3										R-HSA-5339716	Misspliced GSK3beta mutants stabilize beta-catenin	3/292	15/10704	0.00716656	0.176147	0.168742	PPP2R5E/PPP2R5C/PPP2R5D	3
TNIP2	Aβ_down	GO:0032099	negative regulation of appetite	3/448	13/18866	0.00318566	0.349593	0.331203	NUCB2/BBS2/UCN	3										R-HSA-5358747	S33 mutants of beta-catenin aren't phosphorylated	3/292	15/10704	0.00716656	0.176147	0.168742	PPP2R5E/PPP2R5C/PPP2R5D	3
LGI2	Aβ_down	GO:0032868	response to insulin	15/448	283/18866	0.00328708	0.349593	0.331203	GCK/FOXO6/FER/ATP6V1F/EIF4EBP2/LPIN2/UPRT/GRB10/ATP6V0E2/PID1/GOT1/GSK3A/TSC1/HADHA/SRSF6	15										R-HSA-5358749	S37 mutants of beta-catenin aren't phosphorylated	3/292	15/10704	0.00716656	0.176147	0.168742	PPP2R5E/PPP2R5C/PPP2R5D	3
PLPP4	Aβ_down	GO:0008053	mitochondrial fusion	4/448	27/18866	0.00357046	0.349593	0.331203	TFRC/PID1/USP30/MIGA1	4										R-HSA-5358751	S45 mutants of beta-catenin aren't phosphorylated	3/292	15/10704	0.00716656	0.176147	0.168742	PPP2R5E/PPP2R5C/PPP2R5D	3
IRF8	Aβ_down	GO:0048668	collateral sprouting	4/448	27/18866	0.00357046	0.349593	0.331203	FGF13/ABL1/SEMA4D/ZEB2	4										R-HSA-5358752	T41 mutants of beta-catenin aren't phosphorylated	3/292	15/10704	0.00716656	0.176147	0.168742	PPP2R5E/PPP2R5C/PPP2R5D	3
ZXDB	Aβ_down	GO:0016311	dephosphorylation	22/448	492/18866	0.00357248	0.349593	0.331203	PLPP4/SGPP2/PPP2R5E/SEMA4D/MTMR1/DUSP22/LPIN2/DLG2/PHACTR2/PTPRJ/PTPN3/PPP2R5C/ARPP19/PPP2R5D/TSC1/PPP1R1B/PLPPR3/DUSP11/DUSP16/PLPP2/PHLPP1/PPP1CB	22										R-HSA-9694548	Maturation of spike protein	4/292	29/10704	0.00752456	0.177808	0.170333	MAN2A1/MAGT1/GANAB/MGAT1	4
MAP3K21	Aβ_down	GO:0048041	focal adhesion assembly	7/448	83/18866	0.00357549	0.349593	0.331203	SLK/ABL1/PIP5K1A/DUSP22/FERMT2/PTPRJ/TSC1	7										R-HSA-1268020	Mitochondrial protein import	6/292	64/10704	0.00779466	0.177808	0.170333	TIMM13/CHCHD4/SLC25A12/GRPEL1/MTX1/TIMM44	6
CNTN5	Aβ_down	GO:0007611	learning or memory	14/448	260/18866	0.00386074	0.357736	0.338917	ITPR3/FGF13/CAMK4/FOXO6/MECP2/EIF4EBP2/GABRA5/GRIN2A/OXTR/EP300/CLN3/SHC3/UCN/PPP1R1B	14										R-HSA-5683057	MAPK family signaling cascades	17/292	325/10704	0.00780526	0.177808	0.170333	PSMB4/MET/MOV10/PPP2R5E/PEBP1/DLG2/PTPN3/RASGRF2/PPP2R5C/LAMTOR3/PAK3/PPP2R5D/SHC3/PDE6D/DUSP16/FGFR2/PPP1CB	17
TM2D1	Aβ_down	GO:0035627	ceramide transport	3/448	14/18866	0.00398359	0.357736	0.338917	CERT1/PLEKHA3/GLTP	3										R-HSA-8856825	Cargo recognition for clathrin-mediated endocytosis	8/292	106/10704	0.00835318	0.180419	0.172835	CD4/TFRC/NEDD8/EPS15L1/ITSN2/CLTB/COPS3/KIAA0319	8
SGPP2	Aβ_down	GO:0043650	dicarboxylic acid biosynthetic process	3/448	14/18866	0.00398359	0.357736	0.338917	SLC25A12/GOT1/MTHFD1	3										R-HSA-8873719	RAB geranylgeranylation	6/292	65/10704	0.00839603	0.180419	0.172835	RAB2A/RAB22A/RAB9A/RAB3A/RAB6B/RAB30	6
BET1L	Aβ_down	GO:0032365	intracellular lipid transport	5/448	45/18866	0.00412908	0.357736	0.338917	SERAC1/MID1IP1/PRKAB2/CERT1/CPT1A	5										R-HSA-6804758	Regulation of TP53 Activity through Acetylation	4/292	30/10704	0.00849942	0.180419	0.172835	MTA2/EP300/PIP4K2A/PIP4K2C	4
TLR4	Aβ_down	GO:0046839	phospholipid dephosphorylation	5/448	45/18866	0.00412908	0.357736	0.338917	PLPP4/SGPP2/MTMR1/PLPPR3/PLPP2	5										R-HSA-5673001	RAF/MAP kinase cascade	15/292	280/10704	0.00985672	0.194261	0.186095	PSMB4/MET/PPP2R5E/PEBP1/DLG2/PTPN3/RASGRF2/PPP2R5C/LAMTOR3/PPP2R5D/SHC3/PDE6D/DUSP16/FGFR2/PPP1CB	15
COX7C	Aβ_down	GO:0022604	regulation of cell morphogenesis	22/448	499/18866	0.00421792	0.357736	0.338917	FGF13/ALDOA/MOV10/ABL1/MAP1B/SEMA4D/FBLN1/SEMA3D/XK/FERMT2/SRCIN1/ZEB2/CACNG7/PQBP1/FMNL1/BCL11A/PAK3/MYO10/ITSN2/PRAG1/ENPP2/KIAA0319	22										R-HSA-418346	Platelet homeostasis	7/292	88/10704	0.0101086	0.194261	0.186095	ITPR3/PPP2R5E/ATP2A2/STIM1/PPP2R5C/PPP2R5D/GNG3	7
ALDOA	Aβ_down	GO:0042177	negative regulation of protein catabolic process	9/448	133/18866	0.00451676	0.357736	0.338917	HIPK2/DDRGK1/ALAD/NELL1/PTPN3/GRIN2A/SF3B3/LRIG2/TIMP1	9										R-HSA-196299	Beta-catenin phosphorylation cascade	3/292	17/10704	0.0102881	0.194261	0.186095	PPP2R5E/PPP2R5C/PPP2R5D	3
RUBCNL	Aβ_down	GO:0061099	negative regulation of protein tyrosine kinase activity	4/448	29/18866	0.00465508	0.357736	0.338917	DUSP22/SRCIN1/IBTK/VPS25	4										R-HSA-432142	Platelet sensitization by LDL	3/292	17/10704	0.0102881	0.194261	0.186095	PPP2R5E/PPP2R5C/PPP2R5D	3
RBM23	Aβ_down	GO:0009895	negative regulation of catabolic process	16/448	323/18866	0.00470692	0.357736	0.338917	MET/HIPK2/DDRGK1/ALAD/NELL1/SLC25A12/RBM24/PTPN3/GRIN2A/SF3B3/NBAS/GSK3A/LRIG2/USP30/TSC1/TIMP1	16										R-HSA-9022699	MECP2 regulates neuronal receptors and channels	3/292	17/10704	0.0102881	0.194261	0.186095	MET/MECP2/GRIN2A	3
MOV10	Aβ_down	GO:0032105	negative regulation of response to extracellular stimulus	3/448	15/18866	0.00489252	0.357736	0.338917	NUCB2/BBS2/UCN	3										R-HSA-9694516	SARS-CoV-2 Infection	6/292	68/10704	0.0103994	0.194261	0.186095	MAN2A1/UBE2I/GSK3A/MAGT1/GANAB/MGAT1	6
TTI2	Aβ_down	GO:0032108	negative regulation of response to nutrient levels	3/448	15/18866	0.00489252	0.357736	0.338917	NUCB2/BBS2/UCN	3										R-HSA-5684996	MAPK1/MAPK3 signaling	15/292	286/10704	0.011815	0.213241	0.204277	PSMB4/MET/PPP2R5E/PEBP1/DLG2/PTPN3/RASGRF2/PPP2R5C/LAMTOR3/PPP2R5D/SHC3/PDE6D/DUSP16/FGFR2/PPP1CB	15
GCK	Aβ_down	GO:0043434	response to peptide hormone	20/448	447/18866	0.00530054	0.357736	0.338917	GCK/FOXO6/MAP1B/FER/ATP6V1F/EIF4EBP2/LPIN2/UPRT/GRB10/ATP6V0E2/PID1/GOT1/OXTR/GSK3A/TSC1/BSG/TIMP1/HADHA/NME2/SRSF6	20										R-HSA-70326	Glucose metabolism	7/292	91/10704	0.0120342	0.213241	0.204277	ALDOA/GCK/SLC25A11/SLC25A12/GOT1/PPP2R5D/HK1	7
PXDC1	Aβ_down	GO:0031345	negative regulation of cell projection organization	11/448	188/18866	0.00541088	0.357736	0.338917	FGF13/CBFA2T2/SEMA4D/SNAPIN/SEMA3D/BCL11A/GSK3A/LRIG2/TSC1/PRAG1/KIAA0319	11										R-HSA-1368082	RORA activates gene expression	3/292	18/10704	0.0121004	0.213241	0.204277	EP300/CPT1A/NCOA2	3
CTU1	Aβ_down	GO:0042552	myelination	9/448	137/18866	0.00547623	0.357736	0.338917	MARVELD1/NKX6-2/PLP1/UGT8/MPP5/XK/SLC25A12/ZNF24/TSC1	9										R-HSA-70263	Gluconeogenesis	4/292	34/10704	0.0132126	0.228528	0.218921	ALDOA/SLC25A11/SLC25A12/GOT1	4
MAATS1	Aβ_down	GO:0001558	regulation of cell growth	19/448	420/18866	0.00578582	0.357736	0.338917	FGF13/ABL1/SGK3/MAP1B/CCN3/SEMA4D/SEMA3D/CACNG7/PTPRJ/NDRG3/ING1/BCL11A/FHL1/GSK3A/ITSN2/UCN/LAMTOR1/CRYAB/KIAA0319	19										R-HSA-1660499	Synthesis of PIPs at the plasma membrane	5/292	53/10704	0.0143944	0.244443	0.234167	PIP5K1A/MTMR1/PIP4K2A/PIP4K2C/PLEKHA3	5
POU6F2	Aβ_down	GO:0043200	response to amino acid	8/448	114/18866	0.00584726	0.357736	0.338917	UBR2/ALAD/BCL2L2/BCL11A/LAMTOR3/LAMTOR1/SLC1A2/RRAGB	8										R-HSA-9607240	FLT3 Signaling	15/292	294/10704	0.0148865	0.248286	0.237848	PSMB4/MET/PPP2R5E/PEBP1/DLG2/PTPN3/RASGRF2/PPP2R5C/LAMTOR3/PPP2R5D/SHC3/PDE6D/DUSP16/FGFR2/PPP1CB	15
SERAC1	Aβ_down	GO:0071230	cellular response to amino acid stimulus	6/448	69/18866	0.00589011	0.357736	0.338917	UBR2/BCL2L2/BCL11A/LAMTOR3/LAMTOR1/RRAGB	6										R-HSA-5673000	RAF activation	4/292	36/10704	0.0160868	0.263597	0.252516	PPP2R5E/PPP2R5C/PPP2R5D/PPP1CB	4
C6orf89	Aβ_down	GO:0046325	negative regulation of glucose import	3/448	16/18866	0.00591654	0.357736	0.338917	GRB10/PID1/GSK3A	3										R-HSA-9639288	Amino acids regulate mTORC1	5/292	55/10704	0.0167024	0.268965	0.257659	ATP6V1F/ATP6V0E2/LAMTOR3/LAMTOR1/RRAGB	5
SLK	Aβ_down	GO:0050884	neuromuscular process controlling posture	3/448	16/18866	0.00591654	0.357736	0.338917	ADARB1/MECP2/PRRT2	3										R-HSA-389513	CTLA4 inhibitory signaling	3/292	21/10704	0.0185731	0.294021	0.281661	PPP2R5E/PPP2R5C/PPP2R5D	3
MARVELD1	Aβ_down	GO:1904862	inhibitory synapse assembly	3/448	16/18866	0.00591654	0.357736	0.338917	FGF13/LGI2/SEMA4D	3										R-HSA-9617324	Negative regulation of NMDA receptor-mediated neuronal transmission	3/292	22/10704	0.0210807	0.328157	0.314362	CAMK4/DLG2/GRIN2A	3
MEA1	Aβ_down	GO:0006094	gluconeogenesis	7/448	91/18866	0.00593446	0.357736	0.338917	ALDOA/GCK/SLC25A11/SLC25A12/GOT1/ARPP19/EP300	7										R-HSA-438064	Post NMDA receptor activation events	6/292	80/10704	0.0218208	0.334109	0.320064	CAMK4/PRKAG1/DLG2/RASGRF2/GRIN2A/PRKAB2	6
MAN2A1	Aβ_down	GO:0007272	ensheathment of neurons	9/448	139/18866	0.00601152	0.357736	0.338917	MARVELD1/NKX6-2/PLP1/UGT8/MPP5/XK/SLC25A12/ZNF24/TSC1	9										R-HSA-166208	mTORC1-mediated signalling	3/292	24/10704	0.0266244	0.401084	0.384223	LAMTOR3/LAMTOR1/RRAGB	3
L3HYPDH	Aβ_down	GO:0008366	axon ensheathment	9/448	139/18866	0.00601152	0.357736	0.338917	MARVELD1/NKX6-2/PLP1/UGT8/MPP5/XK/SLC25A12/ZNF24/TSC1	9										R-HSA-1834949	Cytosolic sensors of pathogen-associated DNA	5/292	63/10704	0.0283474	0.414987	0.397542	POLR3B/POLR3A/EP300/MRE11/LRRFIP1	5
IQCB1	Aβ_down	GO:0048167	regulation of synaptic plasticity	11/448	191/18866	0.00607813	0.357736	0.338917	ITPR3/SNAP47/ABL1/MAP1B/MECP2/EIF4EBP2/RAB3A/CALB2/GRIN2A/PRRT2/CLN3	11										R-HSA-2151209	Activation of PPARGC1A (PGC-1alpha) by phosphorylation	2/292	10/10704	0.0288803	0.414987	0.397542	PRKAG1/PRKAB2	2
CAMK4	Aβ_down	GO:0042326	negative regulation of phosphorylation	21/448	484/18866	0.00610966	0.357736	0.338917	TLR4/DBNDD2/ABL1/RNF149/SEMA4D/ADARB1/DUSP22/FBLN1/PEBP1/C3orf33/EIF3A/DTNBP1/SRCIN1/PTPRJ/PID1/PPP2R5D/IBTK/PPP1R1B/HDAC3/DUSP16/VPS25	21										R-HSA-3215018	Processing and activation of SUMO	2/292	10/10704	0.0288803	0.414987	0.397542	UBE2I/SAE1	2
CD4	Aβ_down	GO:0072655	establishment of protein localization to mitochondrion	9/448	140/18866	0.00629384	0.357736	0.338917	TIMM13/VPS11/CHCHD4/GRPEL1/GSK3A/SAE1/TIMM44/UBE2D3/HK1	9										R-HSA-3899300	SUMOylation of transcription cofactors	4/292	45/10704	0.0336717	0.476506	0.456474	HIPK2/UBE2I/EP300/NCOA2	4
VWA1	Aβ_down	GO:0099003	vesicle-mediated transport in synapse	12/448	220/18866	0.00651585	0.357736	0.338917	SNAP47/SNAPIN/SYN2/DTNBP1/STXBP5/RAB3A/ATP2A2/PRRT2/SEPTIN5/ITSN2/AMPH/MX1	12										R-HSA-428157	Sphingolipid metabolism	6/292	89/10704	0.0345379	0.481469	0.461229	ARSK/SGPP2/UGT8/CERT1/GLTP/PLPP2	6
URB1-AS1	Aβ_down	GO:1903955	positive regulation of protein targeting to mitochondrion	4/448	32/18866	0.00666524	0.357736	0.338917	VPS11/GSK3A/SAE1/UBE2D3	4										R-HSA-6807070	PTEN Regulation	8/292	140/10704	0.037785	0.502251	0.481138	PSMB4/MOV10/MTA2/LAMTOR3/MTA3/LAMTOR1/HDAC3/RRAGB	8
NUCB2	Aβ_down	GO:0031109	microtubule polymerization or depolymerization	8/448	117/18866	0.00681659	0.357736	0.338917	FGF13/MET/MID1IP1/ABL1/MAP1B/MECP2/TUBG2/CRYAB	8										R-HSA-9024446	NR1H2 and NR1H3-mediated signaling	4/292	47/10704	0.0386579	0.502251	0.481138	MOV10/SCD/EP300/HDAC3	4
ADGRV1	Aβ_down	GO:0099558	maintenance of synapse structure	3/448	17/18866	0.00705922	0.357736	0.338917	CBLN2/DLG2/RAB3A	3										R-HSA-446203	Asparagine N-linked glycosylation	14/292	304/10704	0.0390932	0.502251	0.481138	NANS/BET1L/MAN2A1/COG4/MAN1A1/DYNC1I1/ALG12/AMDHD2/SEC22A/RNF185/MAGT1/ARFGAP2/GANAB/MGAT1	14
POLR3B	Aβ_down	GO:0019319	hexose biosynthetic process	7/448	94/18866	0.00706648	0.357736	0.338917	ALDOA/GCK/SLC25A11/SLC25A12/GOT1/ARPP19/EP300	7										R-HSA-111885	Opioid Signalling	6/292	92/10704	0.0396543	0.502251	0.481138	ITPR3/CAMK4/PDYN/PPP2R5D/PPP1R1B/GNG3	6
GLIS2	Aβ_down	GO:0035176	social behavior	5/448	51/18866	0.00707179	0.357736	0.338917	MECP2/EIF4EBP2/SEPTIN5/OXTR/UCN	5										R-HSA-388841	Costimulation by the CD28 family	5/292	69/10704	0.0397986	0.502251	0.481138	CD4/PPP2R5E/PPP2R5C/PAK3/PPP2R5D	5
ZFAND6	Aβ_down	GO:0008286	insulin receptor signaling pathway	9/448	143/18866	0.00720227	0.357736	0.338917	FOXO6/FER/ATP6V1F/EIF4EBP2/GRB10/ATP6V0E2/PID1/GSK3A/TSC1	9										R-HSA-76061	RNA Polymerase III Transcription Initiation From Type 1 Promoter	3/292	28/10704	0.0398087	0.502251	0.481138	POLR3B/POLR3A/GTF3A	3
FOXO6	Aβ_down	GO:0051937	catecholamine transport	6/448	72/18866	0.00723581	0.357736	0.338917	MECP2/NPY2R/DTNBP1/RAB3A/OXTR/ADRA2C	6										R-HSA-9683701	Translation of structural proteins	3/292	28/10704	0.0398087	0.502251	0.481138	UBE2I/GANAB/MGAT1	3
VPS37A	Aβ_down	GO:0061025	membrane fusion	10/448	169/18866	0.00724631	0.357736	0.338917	BET1L/RUBCNL/CD4/SNAP47/SNAPIN/VPS11/RAB3A/PRRT2/CLN3/MX1	10										R-HSA-879518	Transport of organic anions	2/292	12/10704	0.0408701	0.502251	0.481138	SLCO3A1/SLCO1A2	2
OLR1	Aβ_down	GO:0046627	negative regulation of insulin receptor signaling pathway	4/448	33/18866	0.00744497	0.357736	0.338917	GRB10/PID1/GSK3A/TSC1	4										R-HSA-8963693	Aspartate and asparagine metabolism	2/292	12/10704	0.0408701	0.502251	0.481138	SLC25A12/GOT1	2
RPL19	Aβ_down	GO:0070585	protein localization to mitochondrion	9/448	144/18866	0.00752634	0.357736	0.338917	TIMM13/VPS11/CHCHD4/GRPEL1/GSK3A/SAE1/TIMM44/UBE2D3/HK1	9										R-HSA-442755	Activation of NMDA receptors and postsynaptic events	6/292	93/10704	0.0414611	0.502251	0.481138	CAMK4/PRKAG1/DLG2/RASGRF2/GRIN2A/PRKAB2	6
AC110285.2	Aβ_down	GO:1990778	protein localization to cell periphery	16/448	340/18866	0.0075853	0.357736	0.338917	FGF13/SNAP47/ASB3/MPP5/ATP1B1/PIP5K1A/DLG2/RAB3A/CACNG7/GORASP2/PID1/GRIN2A/CLN3/C16orf70/BBS2/BSG	16										R-HSA-400253	Circadian Clock	5/292	70/10704	0.0419439	0.502251	0.481138	EP300/CPT1A/HDAC3/PPP1CB/NCOA2	5
KLHDC4	Aβ_down	GO:0051966	regulation of synaptic transmission, glutamatergic	6/448	73/18866	0.00773004	0.357736	0.338917	NPY2R/CACNG7/OXTR/CLN3/GRM2/UCN	6										R-HSA-397014	Muscle contraction	10/292	197/10704	0.0435621	0.514213	0.492597	ITPR3/FGF13/KCNIP1/HIPK2/ATP1B1/KCNIP2/CACNG7/ATP2A2/STIM1/CACNB1	10
LPP	Aβ_down	GO:0035249	synaptic transmission, glutamatergic	7/448	96/18866	0.00790528	0.357736	0.338917	NPY2R/CACNG7/OXTR/CLN3/GRM2/SHC3/UCN	7										R-HSA-6811440	Retrograde transport at the Trans-Golgi-Network	4/292	49/10704	0.044044	0.514213	0.492597	COG4/NAA35/RAB9A/RAB6B	4
GDI2	Aβ_down	GO:0050808	synapse organization	19/448	433/18866	0.00790779	0.357736	0.338917	FGF13/LGI2/CNTN5/ABL1/CBLN2/MAP1B/SEMA4D/GAP43/MECP2/SNAPIN/DLG2/SRCIN1/RAB3A/OXTR/PAK3/DGKB/CLN3/TSC1/CACNB1	19										R-HSA-1592230	Mitochondrial biogenesis	6/292	95/10704	0.0452284	0.521522	0.499599	CAMK4/PRKAG1/PRKAB2/MTX1/HDAC3/NCOA2	6
MID1IP1	Aβ_down	GO:0045926	negative regulation of growth	13/448	254/18866	0.00794491	0.357736	0.338917	FGF13/CCN3/SEMA4D/SEMA3D/PTPRJ/NDRG3/ING1/BCL11A/FHL1/GSK3A/BBS2/CRYAB/KIAA0319	13										R-HSA-418360	Platelet calcium homeostasis	3/292	30/10704	0.0474265	0.533935	0.51149	ITPR3/ATP2A2/STIM1	3
EIF1	Aβ_down	GO:0032869	cellular response to insulin stimulus	12/448	226/18866	0.00800085	0.357736	0.338917	GCK/FOXO6/FER/ATP6V1F/EIF4EBP2/LPIN2/GRB10/ATP6V0E2/PID1/GOT1/GSK3A/TSC1	12										R-HSA-1483213	Synthesis of PE	2/292	13/10704	0.0474482	0.533935	0.51149	LPIN2/PISD	2
TTC8	Aβ_down	GO:0034329	cell junction assembly	19/448	434/18866	0.00809416	0.357736	0.338917	FGF13/LGI2/CNTN5/SLK/ABL1/UGT8/MPP5/PATJ/CBLN2/MAP1B/SEMA4D/GAP43/MECP2/PIP5K1A/DUSP22/FERMT2/PTPRJ/OXTR/TSC1	19										R-HSA-9678108	SARS-CoV-1 Infection	4/292	51/10704	0.0498296	0.554057	0.530766	UBE2I/GSK3A/GANAB/MGAT1	4
SCNN1D	Aβ_down	GO:0046486	glycerolipid metabolic process	19/448	434/18866	0.00809416	0.357736	0.338917	SERAC1/PGAP3/MECP2/PIP5K1A/MTMR1/LPIN2/MBOAT7/PISD/DGKB/ITPKC/CLN3/PIP4K2A/CPT1A/PIP4K2C/PLEKHA3/SERINC3/FAR1/HADHA/ENPP2	19
FBXL19	Aβ_down	GO:0050806	positive regulation of synaptic transmission	10/448	172/18866	0.00815956	0.357736	0.338917	ITPR3/SNAP47/ABL1/MECP2/DTNBP1/CACNG7/CALB2/GRIN2A/PRRT2/OXTR	10
RPS29	Aβ_down	GO:0010762	regulation of fibroblast migration	4/448	34/18866	0.00828245	0.357736	0.338917	MTA2/FER/PAK3/CLN3	4
NKX6-2	Aβ_down	GO:0010906	regulation of glucose metabolic process	8/448	121/18866	0.00829222	0.357736	0.338917	RUBCNL/GCK/SLC25A12/ARPP19/GSK3A/EP300/PPP1CB/NCOA2	8
KCNIP1	Aβ_down	GO:0043949	regulation of cAMP-mediated signaling	5/448	53/18866	0.00831322	0.357736	0.338917	APLP1/NPY2R/GSK3A/UCN/FFAR4	5
ZNF134	Aβ_down	GO:0051703	intraspecies interaction between organisms	5/448	53/18866	0.00831322	0.357736	0.338917	MECP2/EIF4EBP2/SEPTIN5/OXTR/UCN	5
SCD	Aβ_down	GO:0006491	N-glycan processing	3/448	18/18866	0.00832369	0.357736	0.338917	MAN2A1/MAN1A1/GANAB	3
CLDND1	Aβ_down	GO:0009064	glutamine family amino acid metabolic process	6/448	75/18866	0.00879069	0.361582	0.342561	MECP2/SLC25A12/DGLUCY/GOT1/CLN3/NIT2	6
PPP2R5E	Aβ_down	GO:0046323	glucose import	6/448	75/18866	0.00879069	0.361582	0.342561	GRB10/PID1/ARPP19/GSK3A/TSC1/SLC1A2	6
CNP	Aβ_down	GO:0007033	vacuole organization	10/448	174/18866	0.00881592	0.361582	0.342561	MAN2A1/SNAPIN/GABARAPL1/VPS11/TP53INP2/ATG9A/CLN3/PIP4K2A/PIP4K2C/LAMTOR1	10
SAT2	Aβ_down	GO:0007173	epidermal growth factor receptor signaling pathway	8/448	123/18866	0.00911407	0.361582	0.342561	HIP1/ABL1/FER/PTPRJ/PTPN3/EPS15L1/SHC3/VPS25	8
DBNDD2	Aβ_down	GO:0046474	glycerophospholipid biosynthetic process	12/448	230/18866	0.00912974	0.361582	0.342561	PGAP3/PIP5K1A/MTMR1/LPIN2/MBOAT7/PISD/DGKB/CLN3/PIP4K2A/PIP4K2C/PLEKHA3/FAR1	12
PLP1	Aβ_down	GO:1900077	negative regulation of cellular response to insulin stimulus	4/448	35/18866	0.00917931	0.361582	0.342561	GRB10/PID1/GSK3A/TSC1	4
SNAP47	Aβ_down	GO:0007044	cell-substrate junction assembly	7/448	99/18866	0.00929812	0.361582	0.342561	SLK/ABL1/PIP5K1A/DUSP22/FERMT2/PTPRJ/TSC1	7
COA5	Aβ_down	GO:0008306	associative learning	6/448	76/18866	0.00935833	0.361582	0.342561	MECP2/GABRA5/GRIN2A/CLN3/UCN/PPP1R1B	6
HMG20B	Aβ_down	GO:0033555	multicellular organismal response to stress	6/448	76/18866	0.00935833	0.361582	0.342561	VWA1/MECP2/NPY2R/GABRA5/UCN/KIAA0319	6
RTL8C	Aβ_down	GO:0071229	cellular response to acid chemical	6/448	76/18866	0.00935833	0.361582	0.342561	UBR2/BCL2L2/BCL11A/LAMTOR3/LAMTOR1/RRAGB	6
DOCK3	Aβ_down	GO:0031929	TOR signaling	8/448	124/18866	0.00954708	0.361582	0.342561	UBR2/EIF4EBP2/LAMTOR3/GSK3A/TSC1/LAMTOR1/HDAC3/RRAGB	8
SLCO3A1	Aβ_down	GO:0050433	regulation of catecholamine secretion	5/448	55/18866	0.009698	0.361582	0.342561	NPY2R/DTNBP1/RAB3A/OXTR/ADRA2C	5
RAB2A	Aβ_down	GO:0032095	regulation of response to food	3/448	19/18866	0.00971262	0.361582	0.342561	NUCB2/BBS2/UCN	3
EXD2	Aβ_down	GO:0044320	cellular response to leptin stimulus	3/448	19/18866	0.00971262	0.361582	0.342561	GCK/PID1/BBS2	3
BORCS8	Aβ_down	GO:0046364	monosaccharide biosynthetic process	7/448	100/18866	0.00979998	0.361582	0.342561	ALDOA/GCK/SLC25A11/SLC25A12/GOT1/ARPP19/EP300	7
FUBP3	Aβ_down	GO:0046785	microtubule polymerization	6/448	77/18866	0.00995166	0.363728	0.344594	FGF13/MET/ABL1/MAP1B/MECP2/TUBG2	6
COG4	Aβ_down	GO:0006007	glucose catabolic process	4/448	36/18866	0.0101371	0.363728	0.344594	ALDOA/GCK/SLC25A12/HK1	4
NOP10	Aβ_down	GO:0070873	regulation of glycogen metabolic process	4/448	36/18866	0.0101371	0.363728	0.344594	RUBCNL/GCK/GSK3A/PPP1CB	4
SLC25A18	Aβ_down	GO:0006906	vesicle fusion	7/448	101/18866	0.0103213	0.364787	0.345598	RUBCNL/SNAP47/SNAPIN/VPS11/RAB3A/PRRT2/CLN3	7
LHX6	Aβ_down	GO:0007050	cell cycle arrest	12/448	234/18866	0.010379	0.364787	0.345598	RGCC/ABL1/NEUROD1/PRKAG1/BRINP3/PRKAB2/LAMTOR3/EP300/LAMTOR1/CDK9/JMY/RRAGB	12
ANO4	Aβ_down	GO:0050732	negative regulation of peptidyl-tyrosine phosphorylation	5/448	56/18866	0.0104465	0.364787	0.345598	SEMA4D/DUSP22/SRCIN1/IBTK/VPS25	5
ACAT1	Aβ_down	GO:0006470	protein dephosphorylation	15/448	323/18866	0.0106976	0.36612	0.34686	PPP2R5E/MTMR1/DUSP22/PHACTR2/PTPRJ/PTPN3/PPP2R5C/ARPP19/PPP2R5D/TSC1/PPP1R1B/DUSP11/DUSP16/PHLPP1/PPP1CB	15
ABL1	Aβ_down	GO:0032006	regulation of TOR signaling	7/448	102/18866	0.0108626	0.36612	0.34686	UBR2/LAMTOR3/GSK3A/TSC1/LAMTOR1/HDAC3/RRAGB	7
CBFA2T2	Aβ_down	GO:0150115	cell-substrate junction organization	7/448	102/18866	0.0108626	0.36612	0.34686	SLK/ABL1/PIP5K1A/DUSP22/FERMT2/PTPRJ/TSC1	7
HSPA14	Aβ_down	GO:0060560	developmental growth involved in morphogenesis	12/448	236/18866	0.0110513	0.36612	0.34686	FGF13/ABL1/MAP1B/SEMA4D/SEMA3D/ZEB2/CACNG7/BCL11A/ITSN2/MESP1/KIAA0319/FGFR2	12
MTA2	Aβ_down	GO:0031330	negative regulation of cellular catabolic process	13/448	265/18866	0.0110825	0.36612	0.34686	MET/HIPK2/DDRGK1/ALAD/NELL1/RBM24/PTPN3/NBAS/GSK3A/LRIG2/USP30/TSC1/TIMP1	13
BLMH	Aβ_down	GO:0010827	regulation of glucose transmembrane transport	6/448	79/18866	0.0112177	0.36612	0.34686	GRB10/PID1/ARPP19/GSK3A/SLC1A2/FFAR4	6
MAN1A1	Aβ_down	GO:0043950	positive regulation of cAMP-mediated signaling	3/448	20/18866	0.0112283	0.36612	0.34686	GSK3A/UCN/FFAR4	3
MRNIP	Aβ_down	GO:0097479	synaptic vesicle localization	5/448	57/18866	0.0112335	0.36612	0.34686	SNAPIN/SYN2/DTNBP1/RAB3A/MX1	5
ASB3	Aβ_down	GO:0008361	regulation of cell size	10/448	181/18866	0.011436	0.369637	0.350192	FGF13/ABL1/MAP1B/SEMA4D/SEMA3D/XK/CLN3/TSC1/UCN/KIAA0319	10
HIPK2	Aβ_down	GO:0005996	monosaccharide metabolic process	14/448	296/18866	0.011567	0.370808	0.351301	ALDOA/RUBCNL/GCK/MAN2A1/SLC25A11/SLC25A12/GOT1/ARPP19/GSK3A/EP300/CPT1A/HK1/PPP1CB/NCOA2	14
LAGE3	Aβ_down	GO:2000300	regulation of synaptic vesicle exocytosis	6/448	80/18866	0.0118916	0.378115	0.358225	SNAPIN/DTNBP1/RAB3A/ATP2A2/PRRT2/SEPTIN5	6
HOPX	Aβ_down	GO:0010829	negative regulation of glucose transmembrane transport	3/448	21/18866	0.0128726	0.40125	0.380142	GRB10/PID1/GSK3A	3
CIT	Aβ_down	GO:0048008	platelet-derived growth factor receptor signaling pathway	5/448	59/18866	0.0129269	0.40125	0.380142	HIP1/ABL1/FER/PTPRJ/LRIG2	5
RBP1	Aβ_down	GO:0016051	carbohydrate biosynthetic process	11/448	213/18866	0.0131543	0.40125	0.380142	NANS/ALDOA/GCK/UGP2/SLC25A11/SLC25A12/GOT1/ARPP19/GSK3A/EP300/PPP1CB	11
PGAP3	Aβ_down	GO:0008654	phospholipid biosynthetic process	13/448	271/18866	0.0131589	0.40125	0.380142	SERAC1/PGAP3/PIP5K1A/MTMR1/LPIN2/MBOAT7/PISD/DGKB/CLN3/PIP4K2A/PIP4K2C/PLEKHA3/FAR1	13
AC104072.1	Aβ_down	GO:0006874	cellular calcium ion homeostasis	19/448	456/18866	0.0131762	0.40125	0.380142	ITPR3/CD4/ABL1/GPR6/ATP1B1/NPY2R/XK/ATP2A2/STIM1/MCUR1/CALB2/GRIN2A/GOT1/OXTR/MICU1/IBTK/CLN3/GNG3/FFAR4	19
ELAVL2	Aβ_down	GO:0046928	regulation of neurotransmitter secretion	7/448	106/18866	0.0132348	0.40125	0.380142	SNAPIN/DTNBP1/RAB3A/ATP2A2/PRRT2/SEPTIN5/RHOT1	7
UGT8	Aβ_down	GO:0001662	behavioral fear response	4/448	39/18866	0.0133908	0.402856	0.381664	MECP2/NPY2R/GABRA5/UCN	4
MPP5	Aβ_down	GO:0001101	response to acid chemical	8/448	132/18866	0.0135816	0.405477	0.384147	UBR2/ALAD/BCL2L2/BCL11A/LAMTOR3/LAMTOR1/SLC1A2/RRAGB	8
PATJ	Aβ_down	GO:0016049	cell growth	20/448	490/18866	0.0137123	0.406278	0.384906	FGF13/ABL1/SGK3/MAP1B/CCN3/SEMA4D/SEMA3D/ZEB2/CACNG7/PTPRJ/NDRG3/ING1/BCL11A/FHL1/GSK3A/ITSN2/UCN/LAMTOR1/CRYAB/KIAA0319	20
BEX3	Aβ_down	GO:0090174	organelle membrane fusion	7/448	107/18866	0.0138816	0.406973	0.385564	RUBCNL/SNAP47/SNAPIN/VPS11/RAB3A/PRRT2/CLN3	7
RNF149	Aβ_down	GO:1903522	regulation of blood circulation	14/448	303/18866	0.0139438	0.406973	0.385564	ITPR3/FGF13/KCNIP1/ASB3/ATP1B1/KCNIP2/CACNG7/ATP2A2/STIM1/OXTR/GSK3A/UCN/ADRA2C/CACNB1	14
WRNIP1	Aβ_down	GO:0043409	negative regulation of MAPK cascade	10/448	187/18866	0.0141178	0.408997	0.387482	TLR4/ABL1/RNF149/FBLN1/PEBP1/C3orf33/EIF3A/PTPRJ/HDAC3/DUSP16	10
DDRGK1	Aβ_down	GO:0097352	autophagosome maturation	4/448	40/18866	0.0146064	0.414721	0.392904	RUBCNL/SNAPIN/GABARAPL1/CLN3	4
NPTXR	Aβ_down	GO:0046324	regulation of glucose import	5/448	61/18866	0.0147848	0.414721	0.392904	GRB10/PID1/ARPP19/GSK3A/SLC1A2	5
RNASEH1	Aβ_down	GO:0015844	monoamine transport	6/448	84/18866	0.014873	0.414721	0.392904	MECP2/NPY2R/DTNBP1/RAB3A/OXTR/ADRA2C	6
C1QTNF9B	Aβ_down	GO:0140029	exocytic process	6/448	84/18866	0.014873	0.414721	0.392904	SNAP47/SNAPIN/VPS11/RAB3A/PRRT2/SEPTIN5	6
SGK3	Aβ_down	GO:0031110	regulation of microtubule polymerization or depolymerization	6/448	85/18866	0.0156925	0.414721	0.392904	FGF13/MET/MID1IP1/ABL1/MAP1B/MECP2	6
MOG	Aβ_down	GO:0070509	calcium ion import	6/448	85/18866	0.0156925	0.414721	0.392904	PLPP4/GCK/ATP2A2/MCUR1/MICU1/UCN	6
DYNC1I1	Aβ_down	GO:0072384	organelle transport along microtubule	6/448	85/18866	0.0156925	0.414721	0.392904	DYNC1I1/MAP1B/SNAPIN/DTNBP1/CLN3/RHOT1	6
FAM234B	Aβ_down	GO:0006734	NADH metabolic process	4/448	41/18866	0.0158897	0.414721	0.392904	ALDOA/GCK/SLC25A12/HK1	4
QPCT	Aβ_down	GO:0035337	fatty-acyl-CoA metabolic process	4/448	41/18866	0.0158897	0.414721	0.392904	SCD/ACAT1/ELOVL7/FAR1	4
LINC01322	Aβ_down	GO:0042596	fear response	4/448	41/18866	0.0158897	0.414721	0.392904	MECP2/NPY2R/GABRA5/UCN	4
TOX4	Aβ_down	GO:1904659	glucose transmembrane transport	7/448	110/18866	0.0159577	0.414721	0.392904	GRB10/PID1/ARPP19/GSK3A/TSC1/SLC1A2/FFAR4	7
NAA35	Aβ_down	GO:0010821	regulation of mitochondrion organization	10/448	191/18866	0.0161504	0.414721	0.392904	TFRC/BCL2L2/VPS11/PID1/GSK3A/EP300/SAE1/USP30/UBE2D3/RHOT1	10
CBLN2	Aβ_down	GO:0016050	vesicle organization	15/448	340/18866	0.0163831	0.414721	0.392904	RUBCNL/VPS37A/SNAP47/SNAPIN/VPS11/RAB22A/DTNBP1/RAB3A/ZEB2/PRRT2/CLN3/LAMTOR1/ARFGAP2/MX1/VPS25	15
GPR27	Aβ_down	GO:0006112	energy reserve metabolic process	6/448	86/18866	0.0165427	0.414721	0.392904	RUBCNL/GCK/UGP2/PID1/GSK3A/PPP1CB	6
PTBP3	Aβ_down	GO:0007035	vacuolar acidification	3/448	23/18866	0.016553	0.414721	0.392904	SNAPIN/ATP6V0E2/CLN3	3
MFGE8	Aβ_down	GO:0009226	nucleotide-sugar biosynthetic process	3/448	23/18866	0.016553	0.414721	0.392904	NANS/AMDHD2/UGP2	3
RPARP-AS1	Aβ_down	GO:0015813	L-glutamate transmembrane transport	3/448	23/18866	0.016553	0.414721	0.392904	SLC25A18/SLC25A12/SLC1A2	3
MAP1B	Aβ_down	GO:0032098	regulation of appetite	3/448	23/18866	0.016553	0.414721	0.392904	NUCB2/BBS2/UCN	3
STAU2	Aβ_down	GO:0051043	regulation of membrane protein ectodomain proteolysis	3/448	23/18866	0.016553	0.414721	0.392904	PTPN3/LRIG2/TIMP1	3
FER	Aβ_down	GO:1902001	fatty acid transmembrane transport	3/448	23/18866	0.016553	0.414721	0.392904	MID1IP1/PRKAB2/CPT1A	3
CCN3	Aβ_down	GO:0030534	adult behavior	8/448	137/18866	0.0166637	0.414721	0.392904	CNP/HIPK2/MECP2/SEPTIN5/TSC1/BBS2/PPP1R1B/SLC1A2	8
GPR6	Aβ_down	GO:0051893	regulation of focal adhesion assembly	5/448	63/18866	0.0168136	0.414721	0.392904	SLK/ABL1/DUSP22/PTPRJ/TSC1	5
AC006450.3	Aβ_down	GO:0090109	regulation of cell-substrate junction assembly	5/448	63/18866	0.0168136	0.414721	0.392904	SLK/ABL1/DUSP22/PTPRJ/TSC1	5
DNAJA2	Aβ_down	GO:0055074	calcium ion homeostasis	19/448	468/18866	0.0168603	0.414721	0.392904	ITPR3/CD4/ABL1/GPR6/ATP1B1/NPY2R/XK/ATP2A2/STIM1/MCUR1/CALB2/GRIN2A/GOT1/OXTR/MICU1/IBTK/CLN3/GNG3/FFAR4	19
SEMA4D	Aβ_down	GO:0006509	membrane protein ectodomain proteolysis	4/448	42/18866	0.0172416	0.420655	0.398526	SPPL2B/PTPN3/LRIG2/TIMP1	4
ADARB1	Aβ_down	GO:0006890	retrograde vesicle-mediated transport, Golgi to endoplasmic reticulum	6/448	87/18866	0.0174242	0.420655	0.398526	BET1L/COG4/RAB6B/NBAS/SURF4/ARFGAP2	6
ATP1B1	Aβ_down	GO:0060291	long-term synaptic potentiation	6/448	87/18866	0.0174242	0.420655	0.398526	ITPR3/SNAP47/ABL1/MECP2/CALB2/GRIN2A	6
GAP43	Aβ_down	GO:1903532	positive regulation of secretion by cell	14/448	313/18866	0.0179731	0.431244	0.408559	RGCC/TLR4/GCK/GPR27/NPY2R/DTNBP1/STXBP5/RAB9A/RAB3A/MYRIP/PRRT2/OXTR/UCN/FFAR4	14
MTCH1	Aβ_down	GO:0007095	mitotic G2 DNA damage checkpoint	3/448	24/18866	0.0185911	0.434224	0.411381	MRNIP/SYF2/MRE11	3
GPR155	Aβ_down	GO:0010640	regulation of platelet-derived growth factor receptor signaling pathway	3/448	24/18866	0.0185911	0.434224	0.411381	HIP1/PTPRJ/LRIG2	3
APLP1	Aβ_down	GO:0044321	response to leptin	3/448	24/18866	0.0185911	0.434224	0.411381	GCK/PID1/BBS2	3
GIT2	Aβ_down	GO:0032008	positive regulation of TOR signaling	4/448	43/18866	0.0186631	0.434224	0.411381	LAMTOR3/LAMTOR1/HDAC3/RRAGB	4
KCNIP2	Aβ_down	GO:0045665	negative regulation of neuron differentiation	11/448	225/18866	0.0190128	0.434224	0.411381	FGF13/CBFA2T2/SEMA4D/SNAPIN/SEMA3D/BCL11A/GSK3A/LRIG2/TSC1/PRAG1/KIAA0319	11
ATP6V1F	Aβ_down	GO:0008645	hexose transmembrane transport	7/448	114/18866	0.0190559	0.434224	0.411381	GRB10/PID1/ARPP19/GSK3A/TSC1/SLC1A2/FFAR4	7
PEG10	Aβ_down	GO:0042391	regulation of membrane potential	18/448	443/18866	0.0195307	0.434224	0.411381	NALCN/FGF13/ABL1/ATP1B1/KCNIP2/MECP2/GABRD/TMEM25/NPY2R/GABRA5/ATP2A2/PTPN3/PID1/GRIN2A/GOT1/FHL1/GSK3A/CLN3	18
ITPRID2	Aβ_down	GO:0008016	regulation of heart contraction	12/448	256/18866	0.0197648	0.434224	0.411381	ITPR3/FGF13/KCNIP1/ASB3/ATP1B1/KCNIP2/CACNG7/ATP2A2/STIM1/GSK3A/UCN/CACNB1	12
MECP2	Aβ_down	GO:0048640	negative regulation of developmental growth	7/448	115/18866	0.0198919	0.434224	0.411381	FGF13/SEMA4D/SEMA3D/BCL11A/GSK3A/BBS2/KIAA0319	7
GABRD	Aβ_down	GO:0032881	regulation of polysaccharide metabolic process	4/448	44/18866	0.0201553	0.434224	0.411381	RUBCNL/GCK/GSK3A/PPP1CB	4
ALG12	Aβ_down	GO:0048489	synaptic vesicle transport	4/448	44/18866	0.0201553	0.434224	0.411381	SNAPIN/DTNBP1/RAB3A/MX1	4
SNX13	Aβ_down	GO:0120009	intermembrane lipid transfer	4/448	44/18866	0.0201553	0.434224	0.411381	CERT1/PLEKHA3/PRELID3B/GLTP	4
HINFP	Aβ_down	GO:1903539	protein localization to postsynaptic membrane	4/448	44/18866	0.0201553	0.434224	0.411381	SNAP47/DLG2/CACNG7/GRIN2A	4
AGAP1	Aβ_down	GO:0060047	heart contraction	13/448	287/18866	0.0201654	0.434224	0.411381	ITPR3/FGF13/KCNIP1/ASB3/ATP1B1/KCNIP2/CACNG7/ATP2A2/STIM1/GSK3A/UCN/CACNB1/VEGFB	13
TAF13	Aβ_down	GO:0150116	regulation of cell-substrate junction organization	5/448	66/18866	0.0201897	0.434224	0.411381	SLK/ABL1/DUSP22/PTPRJ/TSC1	5
EIF4EBP2	Aβ_down	GO:1901607	alpha-amino acid biosynthetic process	5/448	66/18866	0.0201897	0.434224	0.411381	SLC25A12/GOT1/CLN3/SERINC3/MTHFD1	5
PIP5K1A	Aβ_down	GO:0042058	regulation of epidermal growth factor receptor signaling pathway	6/448	90/18866	0.020261	0.434224	0.411381	HIP1/FER/PTPRJ/PTPN3/EPS15L1/VPS25	6
PNCK	Aβ_down	GO:0043470	regulation of carbohydrate catabolic process	6/448	90/18866	0.020261	0.434224	0.411381	GCK/PRKAG1/SLC25A12/GSK3A/EP300/PPP1CB	6
SNAPIN	Aβ_down	GO:0015749	monosaccharide transmembrane transport	7/448	116/18866	0.0207532	0.434224	0.411381	GRB10/PID1/ARPP19/GSK3A/TSC1/SLC1A2/FFAR4	7
SYN2	Aβ_down	GO:0032104	regulation of response to extracellular stimulus	3/448	25/18866	0.0207619	0.434224	0.411381	NUCB2/BBS2/UCN	3
ZNF410	Aβ_down	GO:0032107	regulation of response to nutrient levels	3/448	25/18866	0.0207619	0.434224	0.411381	NUCB2/BBS2/UCN	3
MTMR1	Aβ_down	GO:0051894	positive regulation of focal adhesion assembly	3/448	25/18866	0.0207619	0.434224	0.411381	ABL1/PTPRJ/TSC1	3
DUSP22	Aβ_down	GO:1903859	regulation of dendrite extension	3/448	25/18866	0.0207619	0.434224	0.411381	CACNG7/BCL11A/ITSN2	3
TMEM254	Aβ_down	GO:2000679	positive regulation of transcription regulatory region DNA binding	3/448	25/18866	0.0207619	0.434224	0.411381	DDRGK1/NEUROD1/EP300	3
TPMT	Aβ_down	GO:0051648	vesicle localization	11/448	229/18866	0.0213405	0.435243	0.412347	DYNC1I1/SNAPIN/SYN2/STARD3NL/DTNBP1/RAB3A/SEPTIN5/CLN3/BBS2/ARFGAP2/MX1	11
FBLN1	Aβ_down	GO:0043666	regulation of phosphoprotein phosphatase activity	7/448	117/18866	0.0216401	0.435243	0.412347	PPP2R5E/PHACTR2/PPP2R5C/ARPP19/PPP2R5D/TSC1/PPP1R1B	7
TMEM25	Aβ_down	GO:1903214	regulation of protein targeting to mitochondrion	4/448	45/18866	0.0217188	0.435243	0.412347	VPS11/GSK3A/SAE1/UBE2D3	4
CHAC1	Aβ_down	GO:0007409	axonogenesis	19/448	482/18866	0.0221245	0.435243	0.412347	NPTX1/FGF13/CNP/ABL1/MAP1B/SEMA4D/ADARB1/GAP43/SEMA3D/XK/GRB10/RAB3A/ZEB2/PAK3/BSG/SHC3/KIAA0319/FGFR2/BMPR1B	19
DHX57	Aβ_down	GO:0042147	retrograde transport, endosome to Golgi	6/448	92/18866	0.0223171	0.435243	0.412347	BET1L/RAB9A/SNX32/RAB6B/TBC1D17/VPS26B	6
CETN2	Aβ_down	GO:0010269	response to selenium ion	2/448	10/18866	0.0223176	0.435243	0.412347	ALAD/MIEN1	2
NEUROD1	Aβ_down	GO:0045792	negative regulation of cell size	2/448	10/18866	0.0223176	0.435243	0.412347	TSC1/UCN	2
SPPL2B	Aβ_down	GO:0046710	GDP metabolic process	2/448	10/18866	0.0223176	0.435243	0.412347	DLG2/MPP1	2
PEBP1	Aβ_down	GO:0048755	branching morphogenesis of a nerve	2/448	10/18866	0.0223176	0.435243	0.412347	BCL11A/FGFR2	2
C3orf33	Aβ_down	GO:0060502	epithelial cell proliferation involved in lung morphogenesis	2/448	10/18866	0.0223176	0.435243	0.412347	SRSF6/FGFR2	2
GABARAPL1	Aβ_down	GO:0070472	regulation of uterine smooth muscle contraction	2/448	10/18866	0.0223176	0.435243	0.412347	OXTR/ADRA2C	2
ELOVL7	Aβ_down	GO:0097050	type B pancreatic cell apoptotic process	2/448	10/18866	0.0223176	0.435243	0.412347	NEUROD1/SRSF6	2
ALAD	Aβ_down	GO:2000786	positive regulation of autophagosome assembly	2/448	10/18866	0.0223176	0.435243	0.412347	PIP4K2A/PIP4K2C	2
FUZ	Aβ_down	GO:0006661	phosphatidylinositol biosynthetic process	7/448	118/18866	0.0225529	0.435243	0.412347	PGAP3/PIP5K1A/MTMR1/MBOAT7/PIP4K2A/PIP4K2C/PLEKHA3	7
TFRC	Aβ_down	GO:0034219	carbohydrate transmembrane transport	7/448	118/18866	0.0225529	0.435243	0.412347	GRB10/PID1/ARPP19/GSK3A/TSC1/SLC1A2/FFAR4	7
SPRYD3	Aβ_down	GO:0038127	ERBB signaling pathway	8/448	145/18866	0.0225973	0.435243	0.412347	HIP1/ABL1/FER/PTPRJ/PTPN3/EPS15L1/SHC3/VPS25	8
LPIN2	Aβ_down	GO:1901605	alpha-amino acid metabolic process	10/448	202/18866	0.0228551	0.435243	0.412347	ACAT1/BLMH/MECP2/SLC25A12/DGLUCY/GOT1/CLN3/SERINC3/MTHFD1/NIT2	10
BCL2L2	Aβ_down	GO:0033233	regulation of protein sumoylation	3/448	26/18866	0.0230658	0.435243	0.412347	HMG20B/UBE2I/SAE1	3
PRKAG1	Aβ_down	GO:0005978	glycogen biosynthetic process	4/448	46/18866	0.0233545	0.435243	0.412347	GCK/UGP2/GSK3A/PPP1CB	4
LINC02607	Aβ_down	GO:0009250	glucan biosynthetic process	4/448	46/18866	0.0233545	0.435243	0.412347	GCK/UGP2/GSK3A/PPP1CB	4
NPY2R	Aβ_down	GO:0061097	regulation of protein tyrosine kinase activity	6/448	93/18866	0.0233961	0.435243	0.412347	DOCK3/DUSP22/SRCIN1/IBTK/GPRC5B/VPS25	6
VPS11	Aβ_down	GO:0010469	regulation of signaling receptor activity	9/448	174/18866	0.02342	0.435243	0.412347	NPTX1/MTRNR2L1/NPTXR/DLG2/CACNG7/GRIN2A/ADRA2C/MTRNR2L12/VPS25	9
RADX	Aβ_down	GO:0007269	neurotransmitter secretion	9/448	175/18866	0.0241932	0.435243	0.412347	SNAP47/SNAPIN/SYN2/DTNBP1/RAB3A/ATP2A2/PRRT2/SEPTIN5/RHOT1	9
EIF3A	Aβ_down	GO:0010921	regulation of phosphatase activity	9/448	175/18866	0.0241932	0.435243	0.412347	PPP2R5E/SEMA4D/DLG2/PHACTR2/PPP2R5C/ARPP19/PPP2R5D/TSC1/PPP1R1B	9
ARL16	Aβ_down	GO:0099643	signal release from synapse	9/448	175/18866	0.0241932	0.435243	0.412347	SNAP47/SNAPIN/SYN2/DTNBP1/RAB3A/ATP2A2/PRRT2/SEPTIN5/RHOT1	9
ACBD7	Aβ_down	GO:0051588	regulation of neurotransmitter transport	7/448	120/18866	0.0244577	0.435243	0.412347	SNAPIN/DTNBP1/RAB3A/ATP2A2/PRRT2/SEPTIN5/RHOT1	7
KLHL35	Aβ_down	GO:0042551	neuron maturation	4/448	47/18866	0.025063	0.435243	0.412347	MTCH1/KCNIP2/MECP2/BCL11A	4
DIAPH2	Aβ_down	GO:0010675	regulation of cellular carbohydrate metabolic process	8/448	148/18866	0.0251643	0.435243	0.412347	RUBCNL/GCK/SLC25A12/ARPP19/GSK3A/EP300/PPP1CB/NCOA2	8
SEMA3D	Aβ_down	GO:0061337	cardiac conduction	8/448	148/18866	0.0251643	0.435243	0.412347	ITPR3/KCNIP1/ATP1B1/KCNIP2/CACNG7/ATP2A2/STIM1/CACNB1	8
PDYN	Aβ_down	GO:0001505	regulation of neurotransmitter levels	11/448	235/18866	0.025216	0.435243	0.412347	SNAP47/SNAPIN/SYN2/DTNBP1/RAB3A/ATP2A2/PRRT2/SEPTIN5/CLN3/SLC1A2/RHOT1	11
C11orf54	Aβ_down	GO:0016079	synaptic vesicle exocytosis	7/448	121/18866	0.0254503	0.435243	0.412347	SNAP47/SNAPIN/DTNBP1/RAB3A/ATP2A2/PRRT2/SEPTIN5	7
MIEN1	Aβ_down	GO:0006735	NADH regeneration	3/448	27/18866	0.0255027	0.435243	0.412347	ALDOA/GCK/HK1	3
RAB22A	Aβ_down	GO:0007026	negative regulation of microtubule depolymerization	3/448	27/18866	0.0255027	0.435243	0.412347	FGF13/MID1IP1/MAP1B	3
COMMD2	Aβ_down	GO:0032438	melanosome organization	3/448	27/18866	0.0255027	0.435243	0.412347	SNAPIN/DTNBP1/ZEB2	3
NELL1	Aβ_down	GO:0061621	canonical glycolysis	3/448	27/18866	0.0255027	0.435243	0.412347	ALDOA/GCK/HK1	3
FOXJ3	Aβ_down	GO:0061718	glucose catabolic process to pyruvate	3/448	27/18866	0.0255027	0.435243	0.412347	ALDOA/GCK/HK1	3
AMDHD2	Aβ_down	GO:0003015	heart process	13/448	297/18866	0.0257797	0.435243	0.412347	ITPR3/FGF13/KCNIP1/ASB3/ATP1B1/KCNIP2/CACNG7/ATP2A2/STIM1/GSK3A/UCN/CACNB1/VEGFB	13
XK	Aβ_down	GO:0072503	cellular divalent inorganic cation homeostasis	19/448	492/18866	0.0265979	0.435243	0.412347	ITPR3/CD4/ABL1/GPR6/ATP1B1/NPY2R/XK/ATP2A2/STIM1/MCUR1/CALB2/GRIN2A/GOT1/OXTR/MICU1/IBTK/CLN3/GNG3/FFAR4	19
UPRT	Aβ_down	GO:0046777	protein autophosphorylation	11/448	237/18866	0.0266147	0.435243	0.412347	MAP3K21/SLK/CAMK4/PPP2R5E/ABL1/FER/PPP2R5C/PPP2R5D/MRE11/NME2/FGFR2	11
BRINP3	Aβ_down	GO:0048588	developmental cell growth	11/448	237/18866	0.0266147	0.435243	0.412347	FGF13/ABL1/MAP1B/SEMA4D/SEMA3D/ZEB2/CACNG7/BCL11A/GSK3A/ITSN2/KIAA0319	11
SMIM30	Aβ_down	GO:0015800	acidic amino acid transport	5/448	71/18866	0.026747	0.435243	0.412347	SLC25A18/RAB3A/SLC25A12/GRM2/SLC1A2	5
DLG2	Aβ_down	GO:0031952	regulation of protein autophosphorylation	4/448	48/18866	0.026845	0.435243	0.412347	PPP2R5E/PPP2R5C/PPP2R5D/MRE11	4
PEG3	Aβ_down	GO:0062237	protein localization to postsynapse	4/448	48/18866	0.026845	0.435243	0.412347	SNAP47/DLG2/CACNG7/GRIN2A	4
RUNDC1	Aβ_down	GO:0099637	neurotransmitter receptor transport	4/448	48/18866	0.026845	0.435243	0.412347	HIP1/SNAP47/CACNG7/MX1	4
DHX15	Aβ_down	GO:1904036	negative regulation of epithelial cell apoptotic process	4/448	48/18866	0.026845	0.435243	0.412347	TNIP2/ABL1/NEUROD1/SRSF6	4
CHCHD4	Aβ_down	GO:0010739	positive regulation of protein kinase A signaling	2/448	11/18866	0.0268539	0.435243	0.412347	ADGRV1/SPATC1L	2
C19orf25	Aβ_down	GO:0031630	regulation of synaptic vesicle fusion to presynaptic active zone membrane	2/448	11/18866	0.0268539	0.435243	0.412347	RAB3A/PRRT2	2
STARD3NL	Aβ_down	GO:0035542	regulation of SNARE complex assembly	2/448	11/18866	0.0268539	0.435243	0.412347	VPS11/PRRT2	2
GRB10	Aβ_down	GO:0035865	cellular response to potassium ion	2/448	11/18866	0.0268539	0.435243	0.412347	DLG2/CARF	2
DTNBP1	Aβ_down	GO:0043471	regulation of cellular carbohydrate catabolic process	2/448	11/18866	0.0268539	0.435243	0.412347	GSK3A/PPP1CB	2
ZNF189	Aβ_down	GO:0051561	positive regulation of mitochondrial calcium ion concentration	2/448	11/18866	0.0268539	0.435243	0.412347	MCUR1/MICU1	2
SEC22A	Aβ_down	GO:0070471	uterine smooth muscle contraction	2/448	11/18866	0.0268539	0.435243	0.412347	OXTR/ADRA2C	2
PAFAH1B3	Aβ_down	GO:0106049	regulation of cellular response to osmotic stress	2/448	11/18866	0.0268539	0.435243	0.412347	MICU1/CLN3	2
STXBP5	Aβ_down	GO:0006936	muscle contraction	15/448	362/18866	0.0268909	0.435243	0.412347	FGF13/ALDOA/ASB3/ATP1B1/KCNIP2/NPY2R/ATP2A2/CERT1/OXTR/MYOM2/BBS2/UCN/ADRA2C/CRYAB/VEGFB	15
PSMG3-AS1	Aβ_down	GO:1902905	positive regulation of supramolecular fiber organization	10/448	208/18866	0.0272641	0.435243	0.412347	MET/RGCC/ABL1/MAP1B/FER/MECP2/ARPC3/TSC1/JMY/COLGALT1	10
RAB9A	Aβ_down	GO:0051258	protein polymerization	13/448	300/18866	0.0276691	0.435243	0.412347	FGF13/MET/MID1IP1/ABL1/MAP1B/FER/MECP2/ARPC3/TUBG2/PAK3/MSRB2/MX1/JMY	13
FERMT2	Aβ_down	GO:0035303	regulation of dephosphorylation	10/448	209/18866	0.0280541	0.435243	0.412347	PPP2R5E/SEMA4D/MTMR1/DLG2/PHACTR2/PPP2R5C/ARPP19/PPP2R5D/TSC1/PPP1R1B	10
GABRA5	Aβ_down	GO:0006476	protein deacetylation	6/448	97/18866	0.0280603	0.435243	0.412347	C6orf89/MTA2/MTA3/EP300/UCN/HDAC3	6
SRCIN1	Aβ_down	GO:0120162	positive regulation of cold-induced thermogenesis	6/448	97/18866	0.0280603	0.435243	0.412347	SCD/GRB10/PRKAB2/OXTR/HDAC3/FFAR4	6
UGP2	Aβ_down	GO:1901184	regulation of ERBB signaling pathway	6/448	97/18866	0.0280603	0.435243	0.412347	HIP1/FER/PTPRJ/PTPN3/EPS15L1/VPS25	6
SLC25A11	Aβ_down	GO:0001964	startle response	3/448	28/18866	0.0280724	0.435243	0.412347	MECP2/GRIN2A/UCN	3
FNDC4	Aβ_down	GO:0031645	negative regulation of nervous system process	3/448	28/18866	0.0280724	0.435243	0.412347	CCN3/TMEM25/NPY2R	3
HS6ST3	Aβ_down	GO:0048753	pigment granule organization	3/448	28/18866	0.0280724	0.435243	0.412347	SNAPIN/DTNBP1/ZEB2	3
ZBED8	Aβ_down	GO:0061620	glycolytic process through glucose-6-phosphate	3/448	28/18866	0.0280724	0.435243	0.412347	ALDOA/GCK/HK1	3
ABR	Aβ_down	GO:2000171	negative regulation of dendrite development	3/448	28/18866	0.0280724	0.435243	0.412347	BCL11A/GSK3A/KIAA0319	3
RAB3A	Aβ_down	GO:0046834	lipid phosphorylation	5/448	72/18866	0.0282031	0.435243	0.412347	PIP5K1A/DGKB/ITPKC/PIP4K2A/PIP4K2C	5
UBE2I	Aβ_down	GO:0045017	glycerolipid biosynthetic process	12/448	270/18866	0.0283782	0.435243	0.412347	PGAP3/PIP5K1A/MTMR1/LPIN2/MBOAT7/PISD/DGKB/CLN3/PIP4K2A/PIP4K2C/PLEKHA3/FAR1	12
SNX32	Aβ_down	GO:0051091	positive regulation of DNA-binding transcription factor activity	12/448	270/18866	0.0283782	0.435243	0.412347	RGCC/TLR4/SLCO3A1/HIPK2/DDRGK1/FER/NEUROD1/TFRC/EP300/LRRFIP1/TRIM37/JMY	12
ZEB2	Aβ_down	GO:0042059	negative regulation of epidermal growth factor receptor signaling pathway	4/448	49/18866	0.0287009	0.436767	0.413791	PTPRJ/PTPN3/EPS15L1/VPS25	4
GALNT17	Aβ_down	GO:0047496	vesicle transport along microtubule	4/448	49/18866	0.0287009	0.436767	0.413791	DYNC1I1/SNAPIN/DTNBP1/CLN3	4
HSD17B14	Aβ_down	GO:1901653	cellular response to peptide	16/448	398/18866	0.0290323	0.440097	0.416946	TLR4/GCK/FOXO6/MAP1B/FER/ATP6V1F/EIF4EBP2/LPIN2/BCL2L2/GRB10/ATP6V0E2/PID1/GOT1/GSK3A/TSC1/CACNB1	16
RNF185	Aβ_down	GO:0006835	dicarboxylic acid transport	6/448	98/18866	0.0293154	0.442063	0.418808	SLC25A18/SLC25A11/RAB3A/SLC25A12/GRM2/SLC1A2	6
RAB6B	Aβ_down	GO:0032479	regulation of type I interferon production	7/448	125/18866	0.0296959	0.442063	0.418808	TLR4/POLR3B/POLR3A/PQBP1/EP300/MRE11/LRRFIP1	7
ADCK5	Aβ_down	GO:0005977	glycogen metabolic process	5/448	73/18866	0.0297085	0.442063	0.418808	RUBCNL/GCK/UGP2/GSK3A/PPP1CB	5
SLC25A12	Aβ_down	GO:0051650	establishment of vesicle localization	10/448	212/18866	0.0305215	0.442063	0.418808	DYNC1I1/SNAPIN/STARD3NL/DTNBP1/RAB3A/SEPTIN5/CLN3/BBS2/ARFGAP2/MX1	10
FGFRL1	Aβ_down	GO:0019674	NAD metabolic process	4/448	50/18866	0.0306312	0.442063	0.418808	ALDOA/GCK/SLC25A12/HK1	4
POLD2	Aβ_down	GO:0006517	protein deglycosylation	3/448	29/18866	0.0307744	0.442063	0.418808	MAN2A1/MAN1A1/RNF185	3
BCL7B	Aβ_down	GO:0061615	glycolytic process through fructose-6-phosphate	3/448	29/18866	0.0307744	0.442063	0.418808	ALDOA/GCK/HK1	3
CACNG7	Aβ_down	GO:0150117	positive regulation of cell-substrate junction organization	3/448	29/18866	0.0307744	0.442063	0.418808	ABL1/PTPRJ/TSC1	3
MLF2	Aβ_down	GO:0006073	cellular glucan metabolic process	5/448	74/18866	0.0312636	0.442063	0.418808	RUBCNL/GCK/UGP2/GSK3A/PPP1CB	5
PLRG1	Aβ_down	GO:0044042	glucan metabolic process	5/448	74/18866	0.0312636	0.442063	0.418808	RUBCNL/GCK/UGP2/GSK3A/PPP1CB	5
NAXE	Aβ_down	GO:0090276	regulation of peptide hormone secretion	10/448	213/18866	0.0313771	0.442063	0.418808	ITPR3/GCK/GPR27/CCN3/NEUROD1/MYRIP/CPT1A/UCN/ADRA2C/FFAR4	10
PHACTR2	Aβ_down	GO:0010454	negative regulation of cell fate commitment	2/448	12/18866	0.0317259	0.442063	0.418808	NKX6-2/MESP1	2
POLR3A	Aβ_down	GO:0016188	synaptic vesicle maturation	2/448	12/18866	0.0317259	0.442063	0.418808	SNAPIN/RAB3A	2
MBOAT7	Aβ_down	GO:0036005	response to macrophage colony-stimulating factor	2/448	12/18866	0.0317259	0.442063	0.418808	TLR4/FER	2
CEMIP2	Aβ_down	GO:0036006	cellular response to macrophage colony-stimulating factor stimulus	2/448	12/18866	0.0317259	0.442063	0.418808	TLR4/FER	2
ATP2A2	Aβ_down	GO:0036444	calcium import into the mitochondrion	2/448	12/18866	0.0317259	0.442063	0.418808	MCUR1/MICU1	2
RBM24	Aβ_down	GO:0044090	positive regulation of vacuole organization	2/448	12/18866	0.0317259	0.442063	0.418808	PIP4K2A/PIP4K2C	2
MYRIP	Aβ_down	GO:0045161	neuronal ion channel clustering	2/448	12/18866	0.0317259	0.442063	0.418808	MTCH1/KCNIP2	2
TMTC1	Aβ_down	GO:0060453	regulation of gastric acid secretion	2/448	12/18866	0.0317259	0.442063	0.418808	OXTR/UCN	2
PQBP1	Aβ_down	GO:0090394	negative regulation of excitatory postsynaptic potential	2/448	12/18866	0.0317259	0.442063	0.418808	TMEM25/NPY2R	2
ARHGEF1	Aβ_down	GO:0009132	nucleoside diphosphate metabolic process	8/448	155/18866	0.0319315	0.442063	0.418808	ALDOA/GCK/PRKAG1/DLG2/EP300/MPP1/HK1/NME2	8
RBMXL1	Aβ_down	GO:0050773	regulation of dendrite development	8/448	155/18866	0.0319315	0.442063	0.418808	FOXO6/SEMA4D/SRCIN1/PQBP1/BCL11A/PAK3/GSK3A/KIAA0319	8
RSF1	Aβ_down	GO:0016197	endosomal transport	11/448	244/18866	0.031952	0.442063	0.418808	BET1L/VPS37A/RAB9A/SNX32/RAB6B/EPS15L1/ITSN2/LAMTOR1/TBC1D17/VPS26B/VPS25	11
TXNL4B	Aβ_down	GO:0007416	synapse assembly	9/448	184/18866	0.0319855	0.442063	0.418808	FGF13/LGI2/CNTN5/CBLN2/MAP1B/SEMA4D/GAP43/MECP2/OXTR	9
LYRM9	Aβ_down	GO:0032606	type I interferon production	7/448	127/18866	0.0319877	0.442063	0.418808	TLR4/POLR3B/POLR3A/PQBP1/EP300/MRE11/LRRFIP1	7
PTPRJ	Aβ_down	GO:0031113	regulation of microtubule polymerization	4/448	51/18866	0.0326363	0.445562	0.422124	MET/ABL1/MAP1B/MECP2	4
DGLUCY	Aβ_down	GO:0045912	negative regulation of carbohydrate metabolic process	4/448	51/18866	0.0326363	0.445562	0.422124	GCK/SLC25A12/GSK3A/EP300	4
NDRG3	Aβ_down	GO:0050885	neuromuscular process controlling balance	4/448	51/18866	0.0326363	0.445562	0.422124	NKX6-2/ABL1/ABR/CLN3	4
BMS1	Aβ_down	GO:0051047	positive regulation of secretion	14/448	340/18866	0.0332591	0.445562	0.422124	RGCC/TLR4/GCK/GPR27/NPY2R/DTNBP1/STXBP5/RAB9A/RAB3A/MYRIP/PRRT2/OXTR/UCN/FFAR4	14
STIM1	Aβ_down	GO:0006469	negative regulation of protein kinase activity	11/448	246/18866	0.0336075	0.445562	0.422124	DBNDD2/ABL1/ADARB1/DUSP22/DTNBP1/SRCIN1/PTPRJ/IBTK/PPP1R1B/DUSP16/VPS25	11
GORASP2	Aβ_down	GO:0005979	regulation of glycogen biosynthetic process	3/448	30/18866	0.033608	0.445562	0.422124	GCK/GSK3A/PPP1CB	3
MCUR1	Aβ_down	GO:0010962	regulation of glucan biosynthetic process	3/448	30/18866	0.033608	0.445562	0.422124	GCK/GSK3A/PPP1CB	3
MYSM1	Aβ_down	GO:0030511	positive regulation of transforming growth factor beta receptor signaling pathway	3/448	30/18866	0.033608	0.445562	0.422124	HIPK2/GOT1/EP300	3
CBX3	Aβ_down	GO:0031116	positive regulation of microtubule polymerization	3/448	30/18866	0.033608	0.445562	0.422124	MET/MAP1B/MECP2	3
PTPN3	Aβ_down	GO:0032728	positive regulation of interferon-beta production	3/448	30/18866	0.033608	0.445562	0.422124	TLR4/POLR3B/POLR3A	3
ING1	Aβ_down	GO:0033688	regulation of osteoblast proliferation	3/448	30/18866	0.033608	0.445562	0.422124	ABL1/NELL1/FGFR2	3
CALCOCO1	Aβ_down	GO:1903846	positive regulation of cellular response to transforming growth factor beta stimulus	3/448	30/18866	0.033608	0.445562	0.422124	HIPK2/GOT1/EP300	3
ARPC3	Aβ_down	GO:0050770	regulation of axonogenesis	9/448	186/18866	0.033929	0.448298	0.424715	FGF13/ABL1/MAP1B/SEMA4D/SEMA3D/XK/ZEB2/PAK3/KIAA0319	9
RASGRF2	Aβ_down	GO:0018108	peptidyl-tyrosine phosphorylation	15/448	374/18866	0.0344005	0.451082	0.427353	MET/CD4/DOCK3/ABL1/HIPK2/FER/SEMA4D/DUSP22/SRCIN1/PTPRJ/IBTK/GPRC5B/ENPP2/VPS25/FGFR2	15
AC100810.1	Aβ_down	GO:0016358	dendrite development	11/448	247/18866	0.0344577	0.451082	0.427353	FOXO6/MAP1B/SEMA4D/MECP2/DTNBP1/SRCIN1/PQBP1/BCL11A/PAK3/GSK3A/KIAA0319	11
FMNL1	Aβ_down	GO:1903524	positive regulation of blood circulation	5/448	76/18866	0.0345244	0.451082	0.427353	ATP2A2/OXTR/GSK3A/UCN/ADRA2C	5
C1R	Aβ_down	GO:0031103	axon regeneration	4/448	52/18866	0.0347163	0.451082	0.427353	MAP1B/GAP43/LRIG2/KIAA0319	4
ATP6V0E2	Aβ_down	GO:0033059	cellular pigmentation	4/448	52/18866	0.0347163	0.451082	0.427353	SNAPIN/DTNBP1/ZEB2/BBS2	4
PISD	Aβ_down	GO:0043123	positive regulation of I-kappaB kinase/NF-kappaB signaling	9/448	188/18866	0.0359525	0.455441	0.431482	TNIP2/TLR4/CD4/ABL1/DDRGK1/TFRC/UBE2I/GPRC5B/SHISA5	9
HBS1L	Aβ_down	GO:0035335	peptidyl-tyrosine dephosphorylation	6/448	103/18866	0.0361422	0.455441	0.431482	MTMR1/DUSP22/PTPRJ/PTPN3/DUSP11/DUSP16	6
CALB2	Aβ_down	GO:1901890	positive regulation of cell junction assembly	6/448	103/18866	0.0361422	0.455441	0.431482	ABL1/CBLN2/SEMA4D/PTPRJ/OXTR/TSC1	6
ADAM23	Aβ_down	GO:0018212	peptidyl-tyrosine modification	15/448	377/18866	0.0364952	0.455441	0.431482	MET/CD4/DOCK3/ABL1/HIPK2/FER/SEMA4D/DUSP22/SRCIN1/PTPRJ/IBTK/GPRC5B/ENPP2/VPS25/FGFR2	15
FAM98B	Aβ_down	GO:0031114	regulation of microtubule depolymerization	3/448	31/18866	0.0365723	0.455441	0.431482	FGF13/MID1IP1/MAP1B	3
PID1	Aβ_down	GO:0031338	regulation of vesicle fusion	3/448	31/18866	0.0365723	0.455441	0.431482	VPS11/RAB3A/PRRT2	3
SRRM1	Aβ_down	GO:0050686	negative regulation of mRNA processing	3/448	31/18866	0.0365723	0.455441	0.431482	PTBP3/CDK9/SRSF6	3
KIAA1211L	Aβ_down	GO:0072659	protein localization to plasma membrane	12/448	281/18866	0.0368455	0.455441	0.431482	FGF13/ASB3/MPP5/ATP1B1/PIP5K1A/RAB3A/GORASP2/PID1/CLN3/C16orf70/BBS2/BSG	12
BCL11A	Aβ_down	GO:0007632	visual behavior	4/448	53/18866	0.0368717	0.455441	0.431482	MECP2/GRIN2A/PPP1R1B/SLC1A2	4
TUBG2	Aβ_down	GO:0005513	detection of calcium ion	2/448	13/18866	0.036915	0.455441	0.431482	KCNIP2/STIM1	2
TP53INP2	Aβ_down	GO:0010635	regulation of mitochondrial fusion	2/448	13/18866	0.036915	0.455441	0.431482	TFRC/PID1	2
NACAD	Aβ_down	GO:0033235	positive regulation of protein sumoylation	2/448	13/18866	0.036915	0.455441	0.431482	UBE2I/SAE1	2
ATG9A	Aβ_down	GO:0033605	positive regulation of catecholamine secretion	2/448	13/18866	0.036915	0.455441	0.431482	NPY2R/OXTR	2
GRIN2A	Aβ_down	GO:0046348	amino sugar catabolic process	2/448	13/18866	0.036915	0.455441	0.431482	AMDHD2/MGAT1	2
DZIP3	Aβ_down	GO:1903025	regulation of RNA polymerase II regulatory region sequence-specific DNA binding	2/448	13/18866	0.036915	0.455441	0.431482	DDRGK1/EP300	2
PRRT2	Aβ_down	GO:1905244	regulation of modification of synaptic structure	2/448	13/18866	0.036915	0.455441	0.431482	ABL1/CLN3	2
IMPAD1	Aβ_down	GO:0051048	negative regulation of secretion	9/448	190/18866	0.0380574	0.468058	0.443436	RGCC/CCN3/NPY2R/SRCIN1/ABR/OXTR/UCN/ADRA2C/FFAR4	9
NEDD8	Aβ_down	GO:0045666	positive regulation of neuron differentiation	15/448	380/18866	0.0386808	0.472261	0.447418	FOXO6/HMG20B/CBFA2T2/MAP1B/SEMA4D/NEUROD1/BRINP3/ZEB2/CACNG7/PAK3/ITSN2/EP300/ADRA2C/GPRC5B/NME2	15
PPP2R5C	Aβ_down	GO:1901185	negative regulation of ERBB signaling pathway	4/448	54/18866	0.0391025	0.472261	0.447418	PTPRJ/PTPN3/EPS15L1/VPS25	4
PRKAB2	Aβ_down	GO:0002791	regulation of peptide secretion	15/448	381/18866	0.0394298	0.472261	0.447418	ITPR3/RGCC/TLR4/GCK/GPR27/CCN3/NEUROD1/NPY2R/STXBP5/SRCIN1/MYRIP/CPT1A/UCN/ADRA2C/FFAR4	15
IMP4	Aβ_down	GO:0044818	mitotic G2/M transition checkpoint	3/448	32/18866	0.0396661	0.472261	0.447418	MRNIP/SYF2/MRE11	3
TXNL1	Aβ_down	GO:0045761	regulation of adenylate cyclase activity	3/448	32/18866	0.0396661	0.472261	0.447418	ADGRV1/STIM1/GRM2	3
SEPTIN5	Aβ_down	GO:0046949	fatty-acyl-CoA biosynthetic process	3/448	32/18866	0.0396661	0.472261	0.447418	SCD/ACAT1/ELOVL7	3
SLC35E1	Aβ_down	GO:0007032	endosome organization	5/448	79/18866	0.0397972	0.472261	0.447418	VPS37A/VPS11/RAB22A/LAMTOR1/VPS25	5
GOT1	Aβ_down	GO:0016575	histone deacetylation	5/448	79/18866	0.0397972	0.472261	0.447418	C6orf89/MTA2/MTA3/UCN/HDAC3	5
AFF4	Aβ_down	GO:0070373	negative regulation of ERK1 and ERK2 cascade	5/448	79/18866	0.0397972	0.472261	0.447418	TLR4/ABL1/FBLN1/C3orf33/EIF3A	5
ZFYVE21	Aβ_down	GO:0099601	regulation of neurotransmitter receptor activity	5/448	79/18866	0.0397972	0.472261	0.447418	NPTX1/NPTXR/DLG2/CACNG7/GRIN2A	5
MAGI1	Aβ_down	GO:1903305	regulation of regulated secretory pathway	8/448	162/18866	0.0398478	0.472261	0.447418	FER/SNAPIN/DTNBP1/ABR/RAB3A/ATP2A2/PRRT2/SEPTIN5	8
SF3B3	Aβ_down	GO:0017157	regulation of exocytosis	10/448	222/18866	0.0398482	0.472261	0.447418	FER/SNAPIN/DTNBP1/STXBP5/RAB9A/ABR/RAB3A/ATP2A2/PRRT2/SEPTIN5	10
LAMTOR3	Aβ_down	GO:0019233	sensory perception of pain	6/448	106/18866	0.0406897	0.480697	0.45541	CCN3/MECP2/NPY2R/DLG2/GRIN2A/ADRA2C	6
CCDC86	Aβ_down	GO:0046942	carboxylic acid transport	14/448	350/18866	0.0408095	0.480697	0.45541	MID1IP1/SLCO3A1/SLC25A18/XK/SLC25A11/RAB3A/SLC25A12/PRKAB2/CLN3/CPT1A/GRM2/SLC1A2/SLCO1A2/NCOA2	14
RANBP1	Aβ_down	GO:0032535	regulation of cellular component size	15/448	383/18866	0.040959	0.480697	0.45541	FGF13/ABL1/MAP1B/FER/SEMA4D/SEMA3D/RAB22A/XK/ARPC3/PAK3/CLN3/TSC1/UCN/JMY/KIAA0319	15
CERT1	Aβ_down	GO:0006665	sphingolipid metabolic process	8/448	163/18866	0.0410763	0.480697	0.45541	SGPP2/UGT8/ELOVL7/CERT1/SERINC3/ENPP2/GLTP/PLPP2	8
MTA3	Aβ_down	GO:0051452	intracellular pH reduction	4/448	55/18866	0.0414087	0.480697	0.45541	ATP6V1F/SNAPIN/ATP6V0E2/CLN3	4
OGFOD1	Aβ_down	GO:0035601	protein deacylation	6/448	107/18866	0.0422823	0.480697	0.45541	C6orf89/MTA2/MTA3/EP300/UCN/HDAC3	6
DHCR7	Aβ_down	GO:0015748	organophosphate ester transport	7/448	135/18866	0.0423282	0.480697	0.45541	SLC25A18/ANO4/SLC25A12/CERT1/PLEKHA3/PRELID3B/GLTP	7
NBAS	Aβ_down	GO:0003214	cardiac left ventricle morphogenesis	2/448	14/18866	0.0424036	0.480697	0.45541	NPY2R/GSK3A	2
CHCHD1	Aβ_down	GO:0010935	regulation of macrophage cytokine production	2/448	14/18866	0.0424036	0.480697	0.45541	TLR4/GPRC5B	2
MED19	Aβ_down	GO:0035751	regulation of lysosomal lumen pH	2/448	14/18866	0.0424036	0.480697	0.45541	SNAPIN/CLN3	2
OXTR	Aβ_down	GO:0035791	platelet-derived growth factor receptor-beta signaling pathway	2/448	14/18866	0.0424036	0.480697	0.45541	HIP1/ABL1	2
PAK3	Aβ_down	GO:0046037	GMP metabolic process	2/448	14/18866	0.0424036	0.480697	0.45541	DLG2/MPP1	2
MYO10	Aβ_down	GO:0047484	regulation of response to osmotic stress	2/448	14/18866	0.0424036	0.480697	0.45541	MICU1/CLN3	2
SYF2	Aβ_down	GO:0048681	negative regulation of axon regeneration	2/448	14/18866	0.0424036	0.480697	0.45541	LRIG2/KIAA0319	2
MICU1	Aβ_down	GO:0106070	regulation of adenylate cyclase-activating G protein-coupled receptor signaling pathway	2/448	14/18866	0.0424036	0.480697	0.45541	APLP1/GSK3A	2
SLC14A1	Aβ_down	GO:0001975	response to amphetamine	3/448	33/18866	0.0428882	0.481999	0.456644	GRIN2A/OXTR/PPP1R1B	3
DGKB	Aβ_down	GO:0006536	glutamate metabolic process	3/448	33/18866	0.0428882	0.481999	0.456644	SLC25A12/DGLUCY/GOT1	3
TECPR2	Aβ_down	GO:0034331	cell junction maintenance	3/448	33/18866	0.0428882	0.481999	0.456644	CBLN2/DLG2/RAB3A	3
ZNF598	Aβ_down	GO:0015849	organic acid transport	14/448	353/18866	0.0432947	0.483792	0.458342	MID1IP1/SLCO3A1/SLC25A18/XK/SLC25A11/RAB3A/SLC25A12/PRKAB2/CLN3/CPT1A/GRM2/SLC1A2/SLCO1A2/NCOA2	14
GRPEL1	Aβ_down	GO:0021766	hippocampus development	5/448	81/18866	0.0435697	0.483792	0.458342	FGF13/NEUROD1/ZEB2/TSC1/BBS2	5
ARPP19	Aβ_down	GO:0016482	cytosolic transport	8/448	165/18866	0.0436084	0.483792	0.458342	BET1L/VPS11/RAB9A/SNX32/RAB6B/CLN3/TBC1D17/VPS26B	8
EPS15L1	Aβ_down	GO:0009135	purine nucleoside diphosphate metabolic process	7/448	136/18866	0.0437563	0.483792	0.458342	ALDOA/GCK/PRKAG1/DLG2/EP300/MPP1/HK1	7
OXNAD1	Aβ_down	GO:0009179	purine ribonucleoside diphosphate metabolic process	7/448	136/18866	0.0437563	0.483792	0.458342	ALDOA/GCK/PRKAG1/DLG2/EP300/MPP1/HK1	7
WDR4	Aβ_down	GO:0019320	hexose catabolic process	4/448	56/18866	0.0437904	0.483792	0.458342	ALDOA/GCK/SLC25A12/HK1	4
FHL1	Aβ_down	GO:0008593	regulation of Notch signaling pathway	6/448	108/18866	0.0439136	0.483792	0.458342	CBFA2T2/CCN3/CHAC1/EP300/MESP1/PRAG1	6
PPP2R5D	Aβ_down	GO:0021761	limbic system development	6/448	109/18866	0.0455837	0.497832	0.471644	FGF13/NEUROD1/ZEB2/TSC1/BBS2/FGFR2	6
MSRB2	Aβ_down	GO:0090630	activation of GTPase activity	6/448	109/18866	0.0455837	0.497832	0.471644	PIP5K1A/RUNDC1/ABR/TSC1/TBC1D17/TBC1D1	6
ITPKC	Aβ_down	GO:0019932	second-messenger-mediated signaling	17/448	456/18866	0.0456972	0.497832	0.471644	ITPR3/CD4/GPR6/ATP1B1/APLP1/EIF4EBP2/NEUROD1/NPY2R/ATP2A2/PTPRJ/GRIN2A/GSK3A/UCN/ADRA2C/SAMD14/NME2/FFAR4	17
GSK3A	Aβ_down	GO:0062012	regulation of small molecule metabolic process	17/448	456/18866	0.0456972	0.497832	0.471644	PSMB4/RUBCNL/GCK/MID1IP1/SCD/PRKAG1/SLC25A12/PID1/PRKAB2/DHCR7/ARPP19/GSK3A/EP300/CLN3/CPT1A/PPP1CB/NCOA2	17
SOGA3	Aβ_down	GO:0030431	sleep	3/448	34/18866	0.0462371	0.498515	0.472291	NPY2R/GRIN2A/OXTR	3
LRIG2	Aβ_down	GO:0031112	positive regulation of microtubule polymerization or depolymerization	3/448	34/18866	0.0462371	0.498515	0.472291	MET/MAP1B/MECP2	3
PDIK1L	Aβ_down	GO:0046854	phosphatidylinositol phosphorylation	4/448	57/18866	0.0462475	0.498515	0.472291	PIP5K1A/ITPKC/PIP4K2A/PIP4K2C	4
MYOM2	Aβ_down	GO:0000377	RNA splicing, via transesterification reactions with bulged adenosine as nucleophile	15/448	390/18866	0.0466447	0.498515	0.472291	RBM23/ELAVL2/PTBP3/DHX15/PLRG1/RBM24/PQBP1/RBMXL1/TXNL4B/SRRM1/SF3B3/SYF2/KHDRBS3/SNRPG/SRSF6	15
CEBPB-AS1	Aβ_down	GO:0000398	mRNA splicing, via spliceosome	15/448	390/18866	0.0466447	0.498515	0.472291	RBM23/ELAVL2/PTBP3/DHX15/PLRG1/RBM24/PQBP1/RBMXL1/TXNL4B/SRRM1/SF3B3/SYF2/KHDRBS3/SNRPG/SRSF6	15
ZNF24	Aβ_down	GO:0006836	neurotransmitter transport	10/448	229/18866	0.0474378	0.498515	0.472291	SNAP47/SNAPIN/SYN2/DTNBP1/RAB3A/ATP2A2/PRRT2/SEPTIN5/SLC1A2/RHOT1	10
ITSN2	Aβ_down	GO:0055117	regulation of cardiac muscle contraction	5/448	83/18866	0.0475497	0.498515	0.472291	FGF13/ASB3/ATP1B1/ATP2A2/UCN	5
IBTK	Aβ_down	GO:0006388	tRNA splicing, via endonucleolytic cleavage and ligation	2/448	15/18866	0.0481745	0.498515	0.472291	TSEN54/FAM98B	2
DHX40	Aβ_down	GO:0006646	phosphatidylethanolamine biosynthetic process	2/448	15/18866	0.0481745	0.498515	0.472291	LPIN2/PISD	2
EP300	Aβ_down	GO:0055057	neuroblast division	2/448	15/18866	0.0481745	0.498515	0.472291	FGF13/FGFR2	2
RAB30	Aβ_down	GO:0070571	negative regulation of neuron projection regeneration	2/448	15/18866	0.0481745	0.498515	0.472291	LRIG2/KIAA0319	2
SAE1	Aβ_down	GO:2001171	positive regulation of ATP biosynthetic process	2/448	15/18866	0.0481745	0.498515	0.472291	SLC25A12/PID1	2
CLN3	Aβ_down	GO:0009185	ribonucleoside diphosphate metabolic process	7/448	139/18866	0.0482256	0.498515	0.472291	ALDOA/GCK/PRKAG1/DLG2/EP300/MPP1/HK1	7
MOB4	Aβ_down	GO:0035304	regulation of protein dephosphorylation	7/448	139/18866	0.0482256	0.498515	0.472291	PPP2R5E/PHACTR2/PPP2R5C/ARPP19/PPP2R5D/TSC1/PPP1R1B	7
TTC39C	Aβ_down	GO:0019933	cAMP-mediated signaling	9/448	199/18866	0.0485665	0.498515	0.472291	GPR6/APLP1/EIF4EBP2/NPY2R/GSK3A/UCN/ADRA2C/NME2/FFAR4	9
MTX1	Aβ_down	GO:0051495	positive regulation of cytoskeleton organization	10/448	230/18866	0.0485962	0.498515	0.472291	MET/RGCC/ABL1/MAP1B/FER/MECP2/ARPC3/RANBP1/TSC1/JMY	10
RSPH9	Aβ_down	GO:0006816	calcium ion transport	16/448	426/18866	0.0487397	0.498515	0.472291	NALCN/ITPR3/PLPP4/GCK/CD4/ABL1/ATP1B1/CACNG7/ATP2A2/STIM1/MCUR1/GRIN2A/MICU1/IBTK/UCN/CACNB1	16
MRE11	Aβ_down	GO:0045851	pH reduction	4/448	58/18866	0.0487799	0.498515	0.472291	ATP6V1F/SNAPIN/ATP6V0E2/CLN3	4
PIP4K2A	Aβ_down	GO:1903749	positive regulation of establishment of protein localization to mitochondrion	4/448	58/18866	0.0487799	0.498515	0.472291	VPS11/GSK3A/SAE1/UBE2D3	4
PCNX1	Aβ_down	GO:0044262	cellular carbohydrate metabolic process	12/448	294/18866	0.0489886	0.498515	0.472291	RUBCNL/GCK/MECP2/UGP2/SLC25A12/GOT1/ARPP19/GSK3A/EP300/HK1/PPP1CB/NCOA2	12
CLTB	Aβ_down	GO:0061387	regulation of extent of cell growth	6/448	111/18866	0.0490413	0.498515	0.472291	FGF13/ABL1/MAP1B/SEMA4D/SEMA3D/KIAA0319	6
GCNT4	Aβ_down	GO:0098732	macromolecule deacylation	6/448	111/18866	0.0490413	0.498515	0.472291	C6orf89/MTA2/MTA3/EP300/UCN/HDAC3	6
CPT1A	Aβ_down	GO:0000375	RNA splicing, via transesterification reactions	15/448	393/18866	0.049244	0.498515	0.472291	RBM23/ELAVL2/PTBP3/DHX15/PLRG1/RBM24/PQBP1/RBMXL1/TXNL4B/SRRM1/SF3B3/SYF2/KHDRBS3/SNRPG/SRSF6	15
MAGT1	Aβ_down	GO:0006869	lipid transport	15/448	393/18866	0.049244	0.498515	0.472291	SERAC1/MID1IP1/SLCO3A1/ANO4/NAXE/PRKAB2/CERT1/CLN3/CPT1A/PLEKHA3/PRELID3B/LAMTOR1/GLTP/SLCO1A2/NCOA2	15
USP30	Aβ_down	GO:0008652	cellular amino acid biosynthetic process	5/448	84/18866	0.0496179	0.498515	0.472291	SLC25A12/GOT1/CLN3/SERINC3/MTHFD1	5
MESP1	Aβ_down	GO:0014046	dopamine secretion	3/448	35/18866	0.0497113	0.498515	0.472291	NPY2R/DTNBP1/RAB3A	3
C16orf70	Aβ_down	GO:0014059	regulation of dopamine secretion	3/448	35/18866	0.0497113	0.498515	0.472291	NPY2R/DTNBP1/RAB3A	3
ZBED5	Aβ_down	GO:0031297	replication fork processing	3/448	35/18866	0.0497113	0.498515	0.472291	EXD2/MRE11/CDK9	3
PIP4K2C	Aβ_down	GO:0033687	osteoblast proliferation	3/448	35/18866	0.0497113	0.498515	0.472291	ABL1/NELL1/FGFR2	3
SURF4	Aβ_down	GO:0044743	protein transmembrane import into intracellular organelle	3/448	35/18866	0.0497113	0.498515	0.472291	CHCHD4/GRPEL1/TIMM44	3
PLEKHA3	Aβ_down	GO:0046471	phosphatidylglycerol metabolic process	3/448	35/18866	0.0497113	0.498515	0.472291	SERAC1/MECP2/HADHA	3
KHDRBS3	Aβ_down	GO:1901888	regulation of cell junction assembly	9/448	200/18866	0.0498416	0.498543	0.472318	SLK/ABL1/CBLN2/SEMA4D/GAP43/DUSP22/PTPRJ/OXTR/TSC1	9
QRICH1	Aβ_down
ABCF1	Aβ_down
TSC1	Aβ_down
AMPH	Aβ_down
BBS2	Aβ_down
BSG	Aβ_down
ISG20L2	Aβ_down
CYP27A1	Aβ_down
SIMC1	Aβ_down
GRM2	Aβ_down
SRXN1	Aβ_down
SHC3	Aβ_down
UCN	Aβ_down
ZBTB37	Aβ_down
CLPX	Aβ_down
TIMM44	Aβ_down
ZNF33A	Aβ_down
CCSER2	Aβ_down
TIMP1	Aβ_down
DMAC2	Aβ_down
ADRA2C	Aβ_down
NKRF	Aβ_down
PNPO	Aβ_down
MPP1	Aβ_down
BAZ2B	Aβ_down
PRAG1	Aβ_down
AP003469.4	Aβ_down
LSM14A	Aβ_down
PDE6D	Aβ_down
LINC02802	Aβ_down
PRELID3B	Aβ_down
LAMTOR1	Aβ_down
NLRP1	Aβ_down
UBE2D3	Aβ_down
SERINC3	Aβ_down
FAR1	Aβ_down
ARFGAP2	Aβ_down
FAM122B	Aβ_down
TBC1D17	Aβ_down
MTHFD1	Aβ_down
GANAB	Aβ_down
SPON1	Aβ_down
COPS3	Aβ_down
FAM210B	Aβ_down
MFSD5	Aβ_down
SAMD14	Aβ_down
KIAA0930	Aβ_down
PPP1R1B	Aβ_down
HDAC3	Aβ_down
RANBP6	Aβ_down
NIT2	Aβ_down
KIAA1324L	Aβ_down
PLPPR3	Aβ_down
LRRFIP1	Aβ_down
DUSP11	Aβ_down
HADHA	Aβ_down
GPRC5B	Aβ_down
NRSN1	Aβ_down
CACNB1	Aβ_down
SNRPG	Aβ_down
ZBTB44	Aβ_down
HK1	Aβ_down
MX1	Aβ_down
SPATC1L	Aβ_down
PURB	Aβ_down
TBC1D1	Aβ_down
RPL34	Aβ_down
MGAT1	Aβ_down
ECHDC1	Aβ_down
HDGF	Aβ_down
CDK2AP1	Aβ_down
CRYAB	Aβ_down
ENPP2	Aβ_down
NME2	Aβ_down
GLTP	Aβ_down
ZC3H7A	Aβ_down
MTRNR2L12	Aβ_down
GNG3	Aβ_down
WDR27	Aβ_down
DUSP16	Aβ_down
CDK9	Aβ_down
SRSF6	Aβ_down
MIGA1	Aβ_down
SOHLH1	Aβ_down
TLK1	Aβ_down
TRIM37	Aβ_down
SLC1A2	Aβ_down
SLCO1A2	Aβ_down
CARF	Aβ_down
FFAR4	Aβ_down
JMY	Aβ_down
GTF3A	Aβ_down
RNASE1	Aβ_down
NUFIP2	Aβ_down
SFXN3	Aβ_down
VPS26B	Aβ_down
PLPP2	Aβ_down
HECA	Aβ_down
SHISA5	Aβ_down
VPS25	Aβ_down
TMEM263	Aβ_down
PHLPP1	Aβ_down
DNAL1	Aβ_down
RTKN	Aβ_down
KIAA0319	Aβ_down
FGFR2	Aβ_down
TPD52L2	Aβ_down
BRI3BP	Aβ_down
QSER1	Aβ_down
RRAGB	Aβ_down
ANLN	Aβ_down
VEGFB	Aβ_down
BMPR1B	Aβ_down
PPP1CB	Aβ_down
RHOT1	Aβ_down
AKAP10	Aβ_down
NCOA2	Aβ_down
COLGALT1	Aβ_down

## Sheet: AT8_up_level 3
DEGs in this data sheet were identified by comparing genes in AT8 positive spots with genes in its level 3 spots, which are 245 µm away from AT8 positive spots. All the DEGs in this data sheet were significantly upregulated in AT8 positive spots than in level 3 spots. The pathway analysis was performed as previously described. Top pathways of interest with significance (adjust p value is less tha…
		GO enrichment analysis									KEGG pathway analysis									Reactome analysis
Gene	sample	ID	Description	GeneRatio	BgRatio	pvalue	p.adjust	qvalue	geneID	Count	ID	Description	GeneRatio	BgRatio	pvalue	p.adjust	qvalue	geneID	Count	ID	Description	GeneRatio	BgRatio	pvalue	p.adjust	qvalue	geneID	Count
PCDH9	AT8_up	GO:0050804	modulation of chemical synaptic transmission	31/374	454/18866	2.3755e-09	4.62301e-06	4.0388e-06	SNCA/MAP1B/SNAP25/CLSTN2/SYT1/MPP2/SIPA1L1/SNCG/PPFIA2/EPHA4/YWHAG/NPTX1/IQSEC2/PRKACA/CACNG8/SLC1A3/NEUROD2/PRKCZ/GRIK5/CNIH2/BACE1/CLSTN3/APOE/DCC/PHF24/SYP/PLCB1/NTNG2/MCTP1/GNAI1/CRTC1	31	hsa05012	Parkinson disease	24/177	249/8111	7.06754e-10	1.15623e-07	8.59947e-08	SNCA/CALM2/PSMB7/VDAC3/PSMA1/TUBA1B/UQCRC1/NDUFS8/COX6A1/PRKACA/PRKACA/UQCRQ/NDUFA7/NDUFB4/TUBB/TUBB/TUBB/TUBB/TUBB/TUBB/TUBB/TUBB/COX8A/SDHA/TUBB2A/PSMD8/UCHL1/PSMA6/GNAI1/NDUFB5/CYC1/COX7A2	24	R-HSA-112315	Transmission across Chemical Synapses	22/240	270/10704	1.64019e-07	0.000146141	0.000111015	SNAP25/CALM2/SYT1/MAPK3/PPFIA2/TUBA1B/PRKACA/AP2A1/CACNG8/RPS6KA6/SLC1A3/GRIK5/NCALD/TUBB2A/ERBB4/GLRA3/GRIA2/NEFL/PLCB1/DLG3/PRKAG1/GNAI1	22
SNCA	AT8_up	GO:0099177	regulation of trans-synaptic signaling	31/374	455/18866	2.50366e-09	4.62301e-06	4.0388e-06	SNCA/MAP1B/SNAP25/CLSTN2/SYT1/MPP2/SIPA1L1/SNCG/PPFIA2/EPHA4/YWHAG/NPTX1/IQSEC2/PRKACA/CACNG8/SLC1A3/NEUROD2/PRKCZ/GRIK5/CNIH2/BACE1/CLSTN3/APOE/DCC/PHF24/SYP/PLCB1/NTNG2/MCTP1/GNAI1/CRTC1	31	hsa05020	Prion disease	25/177	273/8111	8.92842e-10	1.15623e-07	8.59947e-08	MAPK3/PSMB7/VDAC3/PSMA1/TUBA1B/UQCRC1/NDUFS8/COX6A1/PRKACA/PRKACA/UQCRQ/NDUFA7/NDUFB4/TUBB/TUBB/TUBB/TUBB/TUBB/TUBB/TUBB/TUBB/COX8A/SDHA/TUBB2A/PSMD8/C1QC/C1QB/BAD/PSMA6/NDUFB5/CYC1/COX7A2/STIP1	25	R-HSA-112314	Neurotransmitter receptors and postsynaptic signal transmission	18/240	205/10704	7.72125e-07	0.000343981	0.000261303	CALM2/MAPK3/TUBA1B/PRKACA/AP2A1/CACNG8/RPS6KA6/GRIK5/NCALD/TUBB2A/ERBB4/GLRA3/GRIA2/NEFL/PLCB1/DLG3/PRKAG1/GNAI1	18
MAP1B	AT8_up	GO:0032869	cellular response to insulin stimulus	19/374	226/18866	1.35106e-07	0.000166315	0.000145298	ATP6V0B/SESN3/ATP6V1F/AP3S1/YWHAG/ATP2B1/GSTP1/PRKCZ/ATP6V0C/RAB10/HDAC9/ATP6V0D1/ERRFI1/PKM/ATP6V1G1/SLC9A1/PID1/SELENOS/RHOQ	19	hsa05016	Huntington disease	26/177	306/8111	2.01005e-09	1.73534e-07	1.29066e-07	CLTB/PSMB7/VDAC3/PSMA1/TUBA1B/UQCRC1/NDUFS8/COX6A1/AP2A1/UQCRQ/SLC1A3/NDUFA7/NDUFB4/TUBB/TUBB/TUBB/TUBB/TUBB/TUBB/TUBB/TUBB/COX8A/SDHA/TUBB2A/PSMD8/GRIA2/PLCB1/PSMA6/ATG2B/NDUFB5/CYC1/POLR2E/COX7A2	26	R-HSA-438064	Post NMDA receptor activation events	11/240	80/10704	1.53454e-06	0.000360837	0.000274107	CALM2/MAPK3/TUBA1B/PRKACA/RPS6KA6/TUBB2A/ERBB4/GRIA2/NEFL/DLG3/PRKAG1	11
ENTPD6	AT8_up	GO:1902600	proton transmembrane transport	15/374	159/18866	6.62246e-07	0.000611419	0.000534154	ATP6V0B/ATP6V1F/ATP1A1/COX6A1/COX8A/ATP6V0C/TMSB4X/SLC9A3R1/ATP6V0D1/SURF1/ATP6V1G1/SLC9A1/CYC1/ANTKMT/COX7A2	15	hsa05010	Alzheimer disease	28/177	369/8111	5.79078e-09	3.74953e-07	2.78872e-07	SNCA/CALM2/MAPK3/PSMB7/VDAC3/PSMA1/AKT3/AKT3/TUBA1B/UQCRC1/NDUFS8/COX6A1/UQCRQ/NDUFA7/NDUFB4/TUBB/TUBB/TUBB/TUBB/TUBB/TUBB/TUBB/TUBB/COX8A/SDHA/TUBB2A/PSMD8/BACE1/APOE/BAD/PLCB1/PSMA6/ATG2B/NDUFB5/CYC1/COX7A2	28	R-HSA-112316	Neuronal System	26/240	410/10704	1.61992e-06	0.000360837	0.000274107	SNAP25/CALM2/SYT1/MAPK3/SIPA1L1/PPFIA2/TUBA1B/PRKACA/AP2A1/CACNG8/RPS6KA6/SLC1A3/KCNK1/GRIK5/NCALD/TUBB2A/ERBB4/GLRA3/GRIA2/NEFL/PLCB1/DLG3/DBNL/PRKAG1/KCNH1/GNAI1	26
SNAP25	AT8_up	GO:0032868	response to insulin	20/374	283/18866	1.02884e-06	0.000663903	0.000580006	ATP6V0B/SESN3/ATP6V1F/AP3S1/YWHAG/ATP2B1/GSTP1/PRKCZ/ATP6V0C/SLC2A1/RAB10/HDAC9/ATP6V0D1/ERRFI1/PKM/ATP6V1G1/SLC9A1/PID1/SELENOS/RHOQ	20	hsa00190	Oxidative phosphorylation	16/177	133/8111	2.60442e-08	1.34909e-06	1.00339e-06	ATP6V0B/ATP6V1F/UQCRC1/NDUFS8/COX6A1/UQCRQ/NDUFA7/NDUFB4/COX8A/SDHA/ATP6V0C/ATP6V0D1/ATP6V1G1/NDUFB5/CYC1/COX7A2	16	R-HSA-442755	Activation of NMDA receptors and postsynaptic events	11/240	93/10704	6.90943e-06	0.00123126	0.000935318	CALM2/MAPK3/TUBA1B/PRKACA/RPS6KA6/TUBB2A/ERBB4/GRIA2/NEFL/DLG3/PRKAG1	11
NRBP2	AT8_up	GO:0043434	response to peptide hormone	26/374	447/18866	1.07864e-06	0.000663903	0.000580006	MAP1B/ATP6V0B/SESN3/ATP6V1F/AP3S1/YWHAG/PRKACA/ATP2B1/GSTP1/PRKCZ/ATP6V0C/SLC2A1/GJA1/RAB10/HDAC9/NEFL/ATP6V0D1/ERRFI1/PKM/ATP6V1G1/SLC9A1/PID1/GNAI1/SELENOS/CYC1/RHOQ	26	hsa05022	Pathways of neurodegeneration - multiple diseases	28/177	475/8111	1.20217e-06	4.70938e-05	3.50261e-05	SNCA/CALM2/MAPK3/PSMB7/VDAC3/PSMA1/TUBA1B/UQCRC1/NDUFS8/COX6A1/UQCRQ/NDUFA7/NDUFB4/TUBB/TUBB/TUBB/TUBB/TUBB/TUBB/TUBB/TUBB/COX8A/SDHA/TUBB2A/PSMD8/BAD/GRIA2/NEFL/PLCB1/UCHL1/PSMA6/ATG2B/NDUFB5/CYC1/COX7A2	28	R-HSA-111447	Activation of BAD and translocation to mitochondria	5/240	15/10704	1.35836e-05	0.00195858	0.00148782	YWHAZ/AKT3/YWHAG/BAD/YWHAE	5
CALM2	AT8_up	GO:1901653	cellular response to peptide	24/374	398/18866	1.50514e-06	0.000757075	0.000661403	MAP1B/ATP6V0B/SESN3/ATP6V1F/EPHA4/AP3S1/YWHAG/PRKACA/ATP2B1/GSTP1/PRKCZ/ATP6V0C/BACE1/GJA1/RAB10/HDAC9/ATP6V0D1/ERRFI1/PKM/ATP6V1G1/SLC9A1/PID1/SELENOS/RHOQ	24	hsa04932	Non-alcoholic fatty liver disease	15/177	155/8111	1.27281e-06	4.70938e-05	3.50261e-05	JUN/AKT3/AKT3/UQCRC1/NDUFS8/COX6A1/UQCRQ/NDUFA7/NDUFB4/COX8A/SDHA/MLXIP/MLXIP/PRKAG1/NDUFB5/CYC1/COX7A2	15	R-HSA-611105	Respiratory electron transport	11/240	101/10704	1.53873e-05	0.00195858	0.00148782	UQCRC1/NDUFS8/COX6A1/UQCRQ/NDUFA7/NDUFB4/COX8A/SDHA/SURF1/NDUFB5/CYC1	11
PPM1K	AT8_up	GO:0006119	oxidative phosphorylation	14/374	149/18866	1.64002e-06	0.000757075	0.000661403	SNCA/UQCRC1/NDUFS8/COX6A1/UQCRQ/NDUFA7/NDUFB4/COX8A/SDHA/SURF1/NDUFB5/CYC1/ANTKMT/COX7A2	14	hsa04714	Thermogenesis	18/177	232/8111	2.7657e-06	8.95395e-05	6.65951e-05	ACSL6/UQCRC1/NDUFAF8/NDUFS8/COX6A1/PRKACA/PRKACA/UQCRQ/SMARCE1/RPS6KA6/NDUFA7/NDUFB4/COX8A/SDHA/PRKAG1/ACSL1/NDUFB5/CYC1/COX7A2	18	R-HSA-1445148	Translocation of SLC2A4 (GLUT4) to the plasma membrane	9/240	72/10704	3.06619e-05	0.00341497	0.00259416	CALM2/YWHAZ/TUBA1B/YWHAG/TUBB2A/RAB10/PRKAG1/YWHAE/RHOQ	9
LYNX1	AT8_up	GO:0071375	cellular response to peptide hormone stimulus	21/374	330/18866	2.96699e-06	0.00121746	0.00106361	MAP1B/ATP6V0B/SESN3/ATP6V1F/AP3S1/YWHAG/PRKACA/ATP2B1/GSTP1/PRKCZ/ATP6V0C/RAB10/HDAC9/ATP6V0D1/ERRFI1/PKM/ATP6V1G1/SLC9A1/PID1/SELENOS/RHOQ	21	hsa05014	Amyotrophic lateral sclerosis	23/177	364/8111	3.79407e-06	0.000109185	8.12063e-05	PSMB7/PSMA1/TUBA1B/UQCRC1/NDUFS8/COX6A1/UQCRQ/NDUFA7/NDUFB4/TUBB/TUBB/TUBB/TUBB/TUBB/TUBB/TUBB/TUBB/COX8A/SDHA/TUBB2A/PSMD8/ERBB4/BAD/GRIA2/NEFL/PSMA6/ATG2B/NDUFB5/CYC1/COX7A2	23	R-HSA-451306	Ionotropic activity of kainate receptors	4/240	12/10704	0.0001059	0.00906954	0.00688961	CALM2/GRIK5/NCALD/DLG3	4
ACBD6	AT8_up	GO:0042775	mitochondrial ATP synthesis coupled electron transport	11/374	97/18866	3.47561e-06	0.00128354	0.00112134	SNCA/UQCRC1/NDUFS8/COX6A1/UQCRQ/NDUFA7/NDUFB4/COX8A/SDHA/NDUFB5/CYC1	11	hsa04261	Adrenergic signaling in cardiomyocytes	14/177	150/8111	4.4832e-06	0.000116115	8.63606e-05	CALM2/MAPK3/AKT3/AKT3/ATP1A1/PRKACA/PRKACA/ATP2B1/CACNG8/SLC8A1/PPP2R5C/PLCB1/PPP2R1A/SLC9A1/GNAI1/PPP2R3C	14	R-HSA-451308	Activation of Ca-permeable Kainate Receptor	4/240	12/10704	0.0001059	0.00906954	0.00688961	CALM2/GRIK5/NCALD/DLG3	4
CLTB	AT8_up	GO:0042773	ATP synthesis coupled electron transport	11/374	98/18866	3.84651e-06	0.00129138	0.00112819	SNCA/UQCRC1/NDUFS8/COX6A1/UQCRQ/NDUFA7/NDUFB4/COX8A/SDHA/NDUFB5/CYC1	11	hsa04721	Synaptic vesicle cycle	10/177	78/8111	6.62423e-06	0.00015597	0.000116003	SNAP25/CLTB/SYT1/ATP6V0B/ATP6V1F/AP2A1/SLC1A3/ATP6V0C/ATP6V0D1/ATP6V1G1	10	R-HSA-163200	Respiratory electron transport, ATP synthesis by chemiosmotic coupling, and heat production by uncoupling proteins.	11/240	125/10704	0.00011197	0.00906954	0.00688961	UQCRC1/NDUFS8/COX6A1/UQCRQ/NDUFA7/NDUFB4/COX8A/SDHA/SURF1/NDUFB5/CYC1	11
YARS	AT8_up	GO:0032386	regulation of intracellular transport	21/374	358/18866	1.04272e-05	0.00308077	0.00269146	MAP1B/CHMP3/MAPK3/YWHAZ/OS9/YWHAG/CABP1/UBL5/PRKACA/REEP1/UBAC2/CNIH2/BAD/MLC1/SH3GLB1/MICALL2/MIEF1/YWHAE/ANTKMT/SAR1B/MSN	21	hsa05415	Diabetic cardiomyopathy	16/177	203/8111	8.33277e-06	0.000179849	0.000133763	VDAC3/AKT3/AKT3/UQCRC1/NDUFS8/COX6A1/UQCRQ/NDUFA7/NDUFB4/COX8A/PRKCZ/SDHA/SLC2A1/PLCB1/NDUFB5/CYC1/COX7A2	16	R-HSA-5628897	TP53 Regulates Metabolic Genes	9/240	87/10704	0.000138052	0.0102503	0.00778659	YWHAZ/SESN3/AKT3/YWHAG/COX6A1/COX8A/SURF1/PRKAG1/YWHAE	9
CLSTN2	AT8_up	GO:0070972	protein localization to endoplasmic reticulum	13/374	152/18866	1.08449e-05	0.00308077	0.00269146	OS9/UBAC2/GRIK5/PMM1/RPL41/RPL30/RPL18A/GJA1/RPL39/RAB10/RPL12/RPS18/GPAA1	13	hsa04260	Cardiac muscle contraction	10/177	87/8111	1.77784e-05	0.000354201	0.000263437	UQCRC1/ATP1A1/COX6A1/CACNG8/UQCRQ/SLC8A1/COX8A/SLC9A1/CYC1/COX7A2	10	R-HSA-9620244	Long-term potentiation	5/240	24/10704	0.00016299	0.0111711	0.00848603	CALM2/ERBB4/GRIA2/NEFL/DLG3	5
ASTN2	AT8_up	GO:0046034	ATP metabolic process	19/374	311/18866	1.56343e-05	0.0041241	0.00360294	SNCA/UQCRC1/NDUFS8/COX6A1/UQCRQ/NDUFA7/NDUFB4/COX8A/SDHA/TMSB4X/BAD/SURF1/PKM/PRKAG1/PID1/NDUFB5/CYC1/ANTKMT/COX7A2	19	hsa04540	Gap junction	9/177	88/8111	0.000118931	0.00220022	0.00163642	MAPK3/TUBA1B/PRKACA/PRKACA/TUBB/TUBB/TUBB/TUBB/TUBB/TUBB/TUBB/TUBB/TUBB2A/GJA1/PLCB1/GNAI1/GUCY1A2	9	R-HSA-5696394	DNA Damage Recognition in GG-NER	6/240	38/10704	0.000180552	0.0114908	0.00872894	COPS5/COPS3/GPS1/PARP2/INO80E/INO80B	6
RABGGTA	AT8_up	GO:0022904	respiratory electron transport chain	11/374	116/18866	1.96425e-05	0.00483598	0.00422486	SNCA/UQCRC1/NDUFS8/COX6A1/UQCRQ/NDUFA7/NDUFB4/COX8A/SDHA/NDUFB5/CYC1	11	hsa04961	Endocrine and other factor-regulated calcium reabsorption	7/177	53/8111	0.00013829	0.00238781	0.00177593	CLTB/ATP1A1/PRKACA/PRKACA/ATP2B1/AP2A1/SLC8A1/PLCB1	7	R-HSA-77387	Insulin receptor recycling	5/240	26/10704	0.00024318	0.0144449	0.010973	ATP6V0B/ATP6V1F/ATP6V0C/ATP6V0D1/ATP6V1G1	5
SYT1	AT8_up	GO:0010644	cell communication by electrical coupling	6/374	31/18866	2.82239e-05	0.00651442	0.00569119	CALM2/ATP1A1/PRKACA/SLC8A1/GJA1/GJB6	6	hsa04530	Tight junction	12/177	169/8111	0.000311086	0.00503571	0.00374532	JUN/TUBA1B/PRKACA/PRKACA/PRKCZ/CLDN5/ARPC3/SLC9A3R1/DLG3/PPP2R1A/PRKAG1/MICALL2/MSN	12	R-HSA-917937	Iron uptake and transport	7/240	58/10704	0.000296264	0.0164982	0.0125327	ATP6V0B/ATP6V1F/FTL/ATP6V0C/ATP6V0D1/ATP6V1G1/ACO1	7
TATDN3	AT8_up	GO:0061337	cardiac conduction	12/374	148/18866	4.0107e-05	0.00871265	0.00761163	CALM2/ATP1A1/PRKACA/ATP2B1/CACNG8/SLC8A1/KCNK1/SPTBN4/GJA1/KCNIP2/YWHAE/SLC9A1	12	hsa04114	Oocyte meiosis	10/177	129/8111	0.000496536	0.00756487	0.00562638	CALM2/MAPK3/YWHAZ/YWHAG/PRKACA/PRKACA/RPS6KA6/PPP2R5C/PPP2R1A/ANAPC1/YWHAE/YWHAE	10	R-HSA-5357801	Programmed Cell Death	13/240	190/10704	0.000346207	0.0181453	0.013784	MAPK3/PSMB7/YWHAZ/PSMA1/AKT3/YWHAG/STUB1/PSMD8/DCC/BAD/PSMA6/DBNL/YWHAE	13
CHMP3	AT8_up	GO:0016241	regulation of macroautophagy	13/374	176/18866	5.12541e-05	0.0105156	0.00918678	NRBP2/MAPK3/ATP6V0B/SESN3/PRKACA/ATP6V0C/POLDIP2/ATP6V0D1/UCHL1/ATP6V1G1/PRKAG1/SH3GLB1/MAP3K7	13	hsa05110	Vibrio cholerae infection	6/177	50/8111	0.000710675	0.0102258	0.00760547	ATP6V0B/ATP6V1F/PRKACA/PRKACA/ATP6V0C/ATP6V0D1/ATP6V1G1	6	R-HSA-442742	CREB1 phosphorylation through NMDA receptor-mediated activation of RAS signaling	5/240	29/10704	0.000415597	0.020572	0.0156274	CALM2/MAPK3/RPS6KA6/NEFL/DLG3	5
HNRNPUL2	AT8_up	GO:0022900	electron transport chain	13/374	184/18866	8.08754e-05	0.0157196	0.0137331	SNCA/UQCRC1/NDUFS8/COX6A1/UQCRQ/NDUFA7/NDUFB4/COX8A/SDHA/SURF1/NDUFB5/CYC1/COX7A2	13	hsa04022	cGMP-PKG signaling pathway	11/177	167/8111	0.00103572	0.0141185	0.0105006	CALM2/MAPK3/VDAC3/AKT3/AKT3/ATP1A1/ATP2B1/SLC8A1/BAD/PLCB1/GNAI1/GUCY1A2	11	R-HSA-114452	Activation of BH3-only proteins	5/240	30/10704	0.000489692	0.022964	0.0174444	YWHAZ/AKT3/YWHAG/BAD/YWHAE	5
MAPK3	AT8_up	GO:0086064	cell communication by electrical coupling involved in cardiac conduction	5/374	24/18866	9.28668e-05	0.0167598	0.0146419	CALM2/ATP1A1/PRKACA/SLC8A1/GJA1	5	hsa04713	Circadian entrainment	8/177	97/8111	0.00121475	0.015731	0.0117	CALM2/MAPK3/PRKACA/PRKACA/ADCYAP1R1/GRIA2/PLCB1/GNAI1/GUCY1A2	8	R-HSA-917977	Transferrin endocytosis and recycling	5/240	31/10704	0.000573305	0.0255407	0.0194019	ATP6V0B/ATP6V1F/ATP6V0C/ATP6V0D1/ATP6V1G1	5
MPP2	AT8_up	GO:0045333	cellular respiration	13/374	187/18866	9.53035e-05	0.0167598	0.0146419	SNCA/UQCRC1/NDUFS8/COX6A1/UQCRQ/NDUFA7/NDUFB4/COX8A/SDHA/SURF1/ACO1/NDUFB5/CYC1	13	hsa05142	Chagas disease	8/177	102/8111	0.00168104	0.0201884	0.0150152	MAPK3/JUN/AKT3/AKT3/C1QC/C1QB/PLCB1/PPP2R1A/GNAI1	8	R-HSA-109581	Apoptosis	12/240	178/10704	0.000664669	0.0270212	0.0205265	MAPK3/PSMB7/YWHAZ/PSMA1/AKT3/YWHAG/PSMD8/DCC/BAD/PSMA6/DBNL/YWHAE	12
APLP2	AT8_up	GO:0035437	maintenance of protein localization in endoplasmic reticulum	4/374	14/18866	0.000129973	0.0215687	0.0188431	OS9/GRIK5/GJA1/GPAA1	4	hsa04145	Phagosome	10/177	152/8111	0.00176044	0.0201884	0.0150152	ATP6V0B/ATP6V1F/TUBA1B/TUBB/TUBB/TUBB/TUBB/TUBB/TUBB/TUBB/TUBB/ATP6V0C/TUBB2A/ATP6V0D1/ATP6V1G1/HLA-DRA/HLA-DRA/HLA-DRA/HLA-DRA/HLA-DRA/HLA-DRA/HLA-DRA/FCGR2A	10	R-HSA-451326	Activation of kainate receptors upon glutamate binding	5/240	32/10704	0.000667191	0.0270212	0.0205265	CALM2/GRIK5/NCALD/PLCB1/DLG3	5
COPS5	AT8_up	GO:0022898	regulation of transmembrane transporter activity	16/374	276/18866	0.000134378	0.0215687	0.0188431	SNCA/CALM2/PRKACA/CACNG8/CNIH2/TMSB4X/S100A1/SLC9A3R1/GJA1/GRIA2/NEFL/DLG3/KCNIP2/YWHAE/SLC9A1/ANTKMT	16	hsa04730	Long-term depression	6/177	60/8111	0.00187074	0.0201884	0.0150152	MAPK3/GRIA2/PLCB1/PPP2R1A/GNAI1/GUCY1A2	6	R-HSA-8951664	Neddylation	14/240	234/10704	0.000798195	0.0309214	0.0234892	COPS5/PSMB7/COPS3/PSMA1/CUL3/FBXO2/ASB1/GPS1/PSMD8/LRRC41/PSMA6/FBXL15/UCHL3/KLHL9	14
WDR7	AT8_up	GO:1903749	positive regulation of establishment of protein localization to mitochondrion	7/374	58/18866	0.000143327	0.0215687	0.0188431	YWHAZ/YWHAG/UBL5/BAD/SH3GLB1/MICALL2/YWHAE	7	hsa04978	Mineral absorption	6/177	60/8111	0.00187074	0.0201884	0.0150152	ATP1A1/ATP2B1/SLC8A1/MT1G/FTL/MT1M	6	R-HSA-8948751	Regulation of PTEN stability and activity	7/240	69/10704	0.000862945	0.0320369	0.0243366	PSMB7/PSMA1/AKT3/STUB1/PSMD8/PSMA6/TRIM27	7
PSMB7	AT8_up	GO:0015980	energy derivation by oxidation of organic compounds	16/374	278/18866	0.000146011	0.0215687	0.0188431	SNCA/UQCRC1/NDUFS8/COX6A1/UQCRQ/NDUFA7/NDUFB4/COX8A/SDHA/SURF1/PPP1R2/ACO1/PID1/SELENOS/NDUFB5/CYC1	16	hsa05165	Human papillomavirus infection	16/177	331/8111	0.00231454	0.0231916	0.0172488	MAPK3/ATP6V0B/ATP6V1F/AKT3/AKT3/PRKACA/PRKACA/PRKCZ/ATP6V0C/PPP2R5C/SLC9A3R1/BAD/ATP6V0D1/DLG3/PPP2R1A/PKM/ATP6V1G1/PPP2R3C	16	R-HSA-109606	Intrinsic Pathway for Apoptosis	6/240	53/10704	0.00113476	0.0397955	0.0302304	MAPK3/YWHAZ/AKT3/YWHAG/BAD/YWHAE	6
DTNA	AT8_up	GO:0050808	synapse organization	21/374	433/18866	0.000162739	0.0226494	0.0197872	SNCA/MAP1B/CLSTN2/SIPA1L1/SNCG/YWHAZ/PPFIA2/EPHA4/SRCIN1/TUBB/NEUROD2/CLSTN3/C1QC/C1QB/APOE/ERBB4/LZTS3/NEFL/DLG3/DBNL/NTNG2	21	hsa04728	Dopaminergic synapse	9/177	132/8111	0.00232812	0.0231916	0.0172488	CALM2/AKT3/AKT3/PRKACA/PRKACA/PPP2R5C/GRIA2/PLCB1/PPP2R1A/GNAI1/PPP2R3C	9	R-HSA-1222556	ROS and RNS production in phagocytes	5/240	36/10704	0.00116126	0.0397955	0.0302304	ATP6V0B/ATP6V1F/ATP6V0C/ATP6V0D1/ATP6V1G1	5
MT-CO2	AT8_up	GO:0006826	iron ion transport	8/374	79/18866	0.00016938	0.0226494	0.0197872	ATP6V0B/ATP6V1F/FTL/ATP6V0C/B2M/ATP6V0D1/ATP6V1G1/PGRMC2	8	hsa04966	Collecting duct acid secretion	4/177	27/8111	0.00259779	0.0244045	0.0181509	ATP6V1F/ATP6V0C/ATP6V0D1/ATP6V1G1	4	R-HSA-376176	Signaling by ROBO receptors	13/240	218/10704	0.00125743	0.0414953	0.0315216	PSMB7/PSMA1/PRKACA/GPC1/PSMD8/RPL41/RPL30/RPL18A/RPL39/DCC/RPL12/RPS18/PSMA6	13
MT-CO3	AT8_up	GO:0009152	purine ribonucleotide biosynthetic process	12/374	173/18866	0.000179567	0.0226494	0.0197872	HPRT1/ACSL6/COASY/TMSB4X/PKM/ACSL1/PID1/CYC1/ANTKMT/PANK3/IMPDH2/GUCY1A2	12	hsa04911	Insulin secretion	7/177	86/8111	0.00263833	0.0244045	0.0181509	SNAP25/CCK/ATP1A1/PRKACA/PRKACA/SLC2A1/ADCYAP1R1/PLCB1	7	R-HSA-438066	Unblocking of NMDA receptors, glutamate binding and activation	4/240	22/10704	0.00131178	0.0417428	0.0317097	CALM2/GRIA2/NEFL/DLG3	4
MT-CYB	AT8_up	GO:0007215	glutamate receptor signaling pathway	9/374	101/18866	0.000180222	0.0226494	0.0197872	CACNG8/GRIK5/CNIH2/GRIA2/NEFL/PLCB1/DLG3/NECAB2/FRRS1L	9	hsa04024	cAMP signaling pathway	12/177	219/8111	0.00298102	0.025868	0.0192393	CALM2/MAPK3/JUN/AKT3/AKT3/ATP1A1/PRKACA/PRKACA/ATP2B1/ADCYAP1R1/BAD/GRIA2/SLC9A1/GNAI1	12	R-HSA-69275	G2/M Transition	12/240	196/10704	0.00153654	0.0472089	0.0358619	PSMB7/PSMA1/TUBA1B/YWHAG/PRKACA/TUBB/TUBB2A/PSMD8/PPP2R1A/PPME1/PSMA6/YWHAE	12
ICAM5	AT8_up	GO:0010469	regulation of signaling receptor activity	12/374	174/18866	0.000189496	0.0226494	0.0197872	LYNX1/LY6H/NPTX1/CACNG8/CNIH2/MTRNR2L8/GRIA2/MTRNR2L12/NEFL/DLG3/ERRFI1/LRPAP1	12	hsa04371	Apelin signaling pathway	9/177	137/8111	0.00299629	0.025868	0.0192393	CALM2/MAPK3/AKT3/AKT3/PRKACA/PRKACA/SLC8A1/PLCB1/PRKAG1/SLC9A1/GNAI1	9	R-HSA-9614399	Regulation of localization of FOXO transcription factors	3/240	11/10704	0.00160759	0.0477455	0.0362695	YWHAZ/AKT3/YWHAG	3
MT-ATP6	AT8_up	GO:0008637	apoptotic mitochondrial changes	10/374	125/18866	0.000195349	0.0226494	0.0197872	YWHAZ/CCK/JUN/YWHAG/TMEM14A/ERBB4/FAM162A/BAD/IFIT2/YWHAE	10	hsa04720	Long-term potentiation	6/177	67/8111	0.00328962	0.0267302	0.0198807	CALM2/MAPK3/PRKACA/PRKACA/RPS6KA6/GRIA2/PLCB1	6	R-HSA-453274	Mitotic G2-G2/M phases	12/240	198/10704	0.00167476	0.0481359	0.0365661	PSMB7/PSMA1/TUBA1B/YWHAG/PRKACA/TUBB/TUBB2A/PSMD8/PPP2R1A/PPME1/PSMA6/YWHAE	12
SIPA1L1	AT8_up	GO:0090383	phagosome acidification	5/374	28/18866	0.000201188	0.0226494	0.0197872	ATP6V0B/ATP6V1F/ATP6V0C/ATP6V0D1/ATP6V1G1	5	hsa05418	Fluid shear stress and atherosclerosis	9/177	139/8111	0.00330258	0.0267302	0.0198807	CALM2/JUN/AKT3/AKT3/GSTP1/PRKCZ/GPC1/MGST1/MGST3/MAP3K7	9	R-HSA-210500	Glutamate Neurotransmitter Release Cycle	4/240	24/10704	0.00183974	0.0512252	0.0389129	SNAP25/SYT1/PPFIA2/SLC1A3	4
MICAL2	AT8_up	GO:0050807	regulation of synapse organization	14/374	229/18866	0.000202391	0.0226494	0.0197872	SNCA/CLSTN2/SIPA1L1/YWHAZ/PPFIA2/EPHA4/SRCIN1/TUBB/NEUROD2/CLSTN3/APOE/LZTS3/DBNL/NTNG2	14	hsa04924	Renin secretion	6/177	69/8111	0.00381277	0.0286745	0.0213267	CALM2/PRKACA/PRKACA/ADCYAP1R1/PLCB1/GNAI1/GUCY1A2	6	R-HSA-1428517	The citric acid (TCA) cycle and respiratory electron transport	11/240	176/10704	0.00203342	0.0533363	0.0405165	UQCRC1/NDUFS8/COX6A1/UQCRQ/NDUFA7/NDUFB4/COX8A/SDHA/SURF1/NDUFB5/CYC1	11
ENC1	AT8_up	GO:0010506	regulation of autophagy	18/374	347/18866	0.000210314	0.0228438	0.0199571	SNCA/NRBP2/MAPK3/ATP6V0B/SESN3/PRKACA/ATP6V0C/GFAP/BAD/POLDIP2/DEPP1/ATP6V0D1/UCHL1/ATP6V1G1/PRKAG1/SH3GLB1/TRIM27/MAP3K7	18	hsa05017	Spinocerebellar ataxia	9/177	143/8111	0.00398895	0.0286745	0.0213267	PSMB7/VDAC3/PSMA1/AKT3/AKT3/PSMD8/GRIA2/PLCB1/PSMA6/ATG2B	9	R-HSA-5689603	UCH proteinases	8/240	102/10704	0.00203528	0.0533363	0.0405165	PSMB7/PSMA1/PSMD8/UCHL1/PSMA6/INO80E/UCHL3/INO80B	8
MT-CO1	AT8_up	GO:0140115	export across plasma membrane	7/374	62/18866	0.000219069	0.0231149	0.0201939	ATP1A1/ATP2B1/SLC8A1/GJA1/KCNIP2/YWHAE/SLC9A1	7	hsa04970	Salivary secretion	7/177	93/8111	0.00409635	0.0286745	0.0213267	CALM2/ATP1A1/PRKACA/PRKACA/ATP2B1/PLCB1/SLC9A1/GUCY1A2	7	R-HSA-191273	Cholesterol biosynthesis	4/240	25/10704	0.00215206	0.0547854	0.0416173	MSMO1/SC5D/MVK/LSS	4
GDAP1	AT8_up	GO:0032409	regulation of transporter activity	16/374	291/18866	0.000245345	0.0246392	0.0215255	SNCA/CALM2/PRKACA/CACNG8/CNIH2/TMSB4X/S100A1/SLC9A3R1/GJA1/GRIA2/NEFL/DLG3/KCNIP2/YWHAE/SLC9A1/ANTKMT	16	hsa05323	Rheumatoid arthritis	7/177	93/8111	0.00409635	0.0286745	0.0213267	ATP6V0B/JUN/ATP6V1F/ATP6V0C/ATP6V0D1/ATP6V1G1/HLA-DRA/HLA-DRA/HLA-DRA/HLA-DRA/HLA-DRA/HLA-DRA/HLA-DRA	7	R-HSA-75035	Chk1/Chk2(Cds1) mediated inactivation of Cyclin B:Cdk1 complex	3/240	13/10704	0.00269552	0.066714	0.0506789	YWHAZ/YWHAG/YWHAE	3
PCDH7	AT8_up	GO:0014047	glutamate secretion	6/374	45/18866	0.000247164	0.0246392	0.0215255	SNAP25/SYT1/PPFIA2/CCK/SLC1A3/GJA1	6	hsa05120	Epithelial cell signaling in Helicobacter pylori infection	6/177	70/8111	0.00409635	0.0286745	0.0213267	ATP6V0B/JUN/ATP6V1F/ATP6V0C/ATP6V0D1/ATP6V1G1	6	R-HSA-418359	Reduction of cytosolic Ca++ levels	3/240	14/10704	0.00337428	0.0812564	0.0617259	CALM2/ATP2B1/SLC8A1	3
TMEM47	AT8_up	GO:0140029	exocytic process	8/374	84/18866	0.000259781	0.0246392	0.0215255	SNCA/SNAP25/SYT1/GRIK5/RAB10/CADPS2/YKT6/RAB3C	8	hsa04071	Sphingolipid signaling pathway	8/177	119/8111	0.00439848	0.0292104	0.0217253	MAPK3/AKT3/AKT3/PRKCZ/PPP2R5C/PLCB1/PPP2R1A/GNAI1/PPP2R3C	8	R-HSA-9006925	Intracellular signaling by second messengers	15/240	306/10704	0.00375502	0.0841062	0.0638907	CALM2/MAPK3/PSMB7/JUN/PSMA1/AKT3/PRKACA/STUB1/PSMD8/ERBB4/PPP2R5C/BAD/PPP2R1A/PSMA6/TRIM27	15
SNCG	AT8_up	GO:0043254	regulation of protein-containing complex assembly	21/374	449/18866	0.000266113	0.0246392	0.0215255	SNCA/MAP1B/CCK/LMO4/SLC39A12/STMN2/MTLN/STUB1/PRKCZ/SPTBN4/GFAP/TMSB4X/ARPC3/APOE/TMSB10/AIDA/DBNL/SH3GLB1/TRIM27/SAR1B/MSN	21	hsa04722	Neurotrophin signaling pathway	8/177	119/8111	0.00439848	0.0292104	0.0217253	CALM2/MAPK3/JUN/ARHGDIG/AKT3/AKT3/RPS6KA6/BAD/YWHAE/YWHAE	8	R-HSA-9619483	Activation of AMPK downstream of NMDARs	4/240	29/10704	0.00376717	0.0841062	0.0638907	CALM2/TUBA1B/TUBB2A/PRKAG1	4
NMNAT2	AT8_up	GO:1900449	regulation of glutamate receptor signaling pathway	7/374	64/18866	0.000267506	0.0246392	0.0215255	CACNG8/CNIH2/GRIA2/NEFL/DLG3/NECAB2/FRRS1L	7	hsa05171	Coronavirus disease - COVID-19	12/177	232/8111	0.00474569	0.0296729	0.0220693	MAPK3/JUN/C1QC/C1QB/RPL41/RPL30/RPL18A/RPL39/RPL12/RPS18/RPS18/RPS18/RPS18/RPS18/RPS18/MAP3K7/FCGR2A	12	R-HSA-190828	Gap junction trafficking	5/240	47/10704	0.00387021	0.0841062	0.0638907	CLTB/TUBA1B/TUBB2A/GJA1/GJB6	5
MSMO1	AT8_up	GO:0051051	negative regulation of transport	22/374	483/18866	0.000276033	0.0246392	0.0215255	SNCA/MAP1B/CALM2/OS9/VSNL1/SRCIN1/CABP1/UBAC2/TMEM14A/CNIH2/APOE/SLC9A3R1/GJA1/HDAC9/NECAB2/LRPAP1/MCTP1/YWHAE/PID1/SELENOS/PPP1R11/TRIM27	22	hsa04919	Thyroid hormone signaling pathway	8/177	121/8111	0.00486457	0.0296729	0.0220693	MAPK3/AKT3/AKT3/ATP1A1/PRKACA/PRKACA/SLC2A1/BAD/PLCB1/SLC9A1	8	R-HSA-437239	Recycling pathway of L1	5/240	47/10704	0.00387021	0.0841062	0.0638907	TUBA1B/AP2A1/RPS6KA6/TUBB2A/MSN	5
YWHAZ	AT8_up	GO:0035418	protein localization to synapse	8/374	85/18866	0.000281899	0.0246392	0.0215255	SNAP25/IQSEC2/CACNG8/PRKCZ/CNIH2/CLSTN3/DLG3/RAB27B	8	hsa05203	Viral carcinogenesis	11/177	204/8111	0.00497604	0.0296729	0.0220693	MAPK3/YWHAZ/VDAC3/JUN/YWHAG/PRKACA/PRKACA/BAD/HDAC9/ATP6V0D1/PKM/YWHAE/YWHAE	11	R-HSA-6807070	PTEN Regulation	9/240	140/10704	0.00423566	0.0898564	0.0682588	MAPK3/PSMB7/JUN/PSMA1/AKT3/STUB1/PSMD8/PSMA6/TRIM27	9
SEMA6B	AT8_up	GO:0009612	response to mechanical stimulus	13/374	209/18866	0.00028689	0.0246392	0.0215255	MAP1B/MAPK3/JUN/ATP1A1/SLC8A1/SLC1A3/BACE1/SLC2A1/CHI3L1/GJA1/BAD/PHF24/SLC9A1	13	hsa04723	Retrograde endocannabinoid signaling	9/177	148/8111	0.00499878	0.0296729	0.0220693	MAPK3/NDUFS8/PRKACA/PRKACA/NDUFA7/NDUFB4/GRIA2/PLCB1/GNAI1/NDUFB5	9	R-HSA-157858	Gap junction trafficking and regulation	5/240	49/10704	0.00464033	0.096152	0.0730412	CLTB/TUBA1B/TUBB2A/GJA1/GJB6	5
ATP6V0B	AT8_up	GO:0050803	regulation of synapse structure or activity	14/374	240/18866	0.00032721	0.0272969	0.0238474	SNCA/CLSTN2/SIPA1L1/YWHAZ/PPFIA2/EPHA4/SRCIN1/TUBB/NEUROD2/CLSTN3/APOE/LZTS3/DBNL/NTNG2	14	hsa01524	Platinum drug resistance	6/177	73/8111	0.00504096	0.0296729	0.0220693	MAPK3/AKT3/AKT3/GSTP1/MGST1/BAD/MGST3	6	R-HSA-392517	Rap1 signalling	3/240	16/10704	0.00502228	0.0997107	0.0757446	YWHAZ/PRKACA/RAP1GAP2	3
TTC9	AT8_up	GO:0070646	protein modification by small protein removal	16/374	300/18866	0.000344521	0.0272969	0.0238474	COPS5/PSMB7/COPS3/PSMA1/ATXN7L3/GPS1/PSMD8/UCHL1/PSMA6/INO80E/UCHL3/INO80B/UBXN1/DESI1/MAP3K7/MINDY3	16	hsa04611	Platelet activation	8/177	124/8111	0.00563369	0.032425	0.0241162	MAPK3/AKT3/AKT3/PRKACA/PRKACA/PRKCZ/PLCB1/GNAI1/GUCY1A2/FCGR2A	8	R-HSA-380320	Recruitment of NuMA to mitotic centrosomes	7/240	94/10704	0.0051103	0.0997107	0.0757446	TUBA1B/YWHAG/PRKACA/TUBB/TUBB2A/PPP2R1A/YWHAE	7
PPFIA2	AT8_up	GO:0009260	ribonucleotide biosynthetic process	12/374	186/18866	0.000350267	0.0272969	0.0238474	HPRT1/ACSL6/COASY/TMSB4X/PKM/ACSL1/PID1/CYC1/ANTKMT/PANK3/IMPDH2/GUCY1A2	12	hsa04971	Gastric acid secretion	6/177	76/8111	0.00613658	0.0338165	0.025151	CALM2/ATP1A1/PRKACA/PRKACA/PLCB1/SLC9A1/GNAI1	6	R-HSA-9010553	Regulation of expression of SLITs and ROBOs	10/240	171/10704	0.0051478	0.0997107	0.0757446	PSMB7/PSMA1/PSMD8/RPL41/RPL30/RPL18A/RPL39/RPL12/RPS18/PSMA6	10
LY6H	AT8_up	GO:0061001	regulation of dendritic spine morphogenesis	6/374	48/18866	0.000354249	0.0272969	0.0238474	SIPA1L1/PPFIA2/EPHA4/SRCIN1/LZTS3/DBNL	6	hsa05133	Pertussis	6/177	76/8111	0.00613658	0.0338165	0.025151	CALM2/MAPK3/JUN/C1QC/C1QB/GNAI1	6	R-HSA-373760	L1CAM interactions	8/240	119/10704	0.00526556	0.0998215	0.0758288	MAPK3/TUBA1B/AP2A1/RPS6KA6/SPTBN4/TUBB2A/DLG3/MSN	8
CCK	AT8_up	GO:0006839	mitochondrial transport	15/374	271/18866	0.000354793	0.0272969	0.0238474	GDAP1/YWHAZ/YWHAG/UBL5/TMEM14A/BAD/SLC25A38/SH3GLB1/MICALL2/SFXN5/YWHAE/SLC9A1/CYC1/SMDT1/ANTKMT	15	hsa04921	Oxytocin signaling pathway	9/177	154/8111	0.00646131	0.0348642	0.0259303	CALM2/MAPK3/JUN/PRKACA/PRKACA/CACNG8/PLCB1/PRKAG1/GNAI1/GUCY1A2	9	R-HSA-3858494	Beta-catenin independent WNT signaling	9/240	146/10704	0.00556838	0.103363	0.0785191	CALM2/CLTB/PSMB7/PSMA1/AP2A1/PSMD8/PLCB1/PSMA6/MAP3K7	9
COPS3	AT8_up	GO:0043687	post-translational protein modification	18/374	363/18866	0.000362601	0.0273283	0.0238748	RABGGTA/APLP2/COPS5/PSMB7/COPS3/PSMA1/CUL3/FBXO2/ASB1/GPS1/PSMD8/APOE/TMEM132A/LRRC41/PSMA6/FBXL15/UCHL3/KLHL9	18	hsa05160	Hepatitis C	9/177	157/8111	0.0073062	0.0386185	0.0287225	MAPK3/YWHAZ/AKT3/AKT3/YWHAG/CLDN5/BAD/PPP2R1A/EIF2AK1/YWHAE/YWHAE	9	R-HSA-264642	Acetylcholine Neurotransmitter Release Cycle	3/240	17/10704	0.0059986	0.109077	0.0828593	SNAP25/SYT1/PPFIA2	3
VDAC3	AT8_up	GO:0099072	regulation of postsynaptic membrane neurotransmitter receptor levels	7/374	68/18866	0.000390146	0.0285239	0.0249194	SNAP25/IQSEC2/CACNG8/PRKCZ/DLG3/FRRS1L/YWHAE	7	hsa04922	Glucagon signaling pathway	7/177	107/8111	0.00875086	0.0450068	0.0334739	CALM2/AKT3/AKT3/PRKACA/PRKACA/SLC2A1/PLCB1/PKM/PRKAG1	7	R-HSA-5358351	Signaling by Hedgehog	9/240	149/10704	0.00634603	0.109989	0.0835524	PSMB7/OS9/PSMA1/TUBA1B/CUL3/PRKACA/TUBB2A/PSMD8/PSMA6	9
JUN	AT8_up	GO:0051651	maintenance of location in cell	13/374	216/18866	0.000393913	0.0285239	0.0249194	SNCA/CALM2/OS9/PRKACA/SLC8A1/FTL/MTLN/GRIK5/TMSB4X/APOE/GJA1/TMSB10/GPAA1	13	hsa00100	Steroid biosynthesis	3/177	20/8111	0.00886235	0.0450068	0.0334739	MSMO1/SC5D/LSS/LSS	3	R-HSA-5683057	MAPK family signaling cascades	15/240	325/10704	0.00650322	0.109989	0.0835524	CALM2/MAPK3/PSMB7/JUN/PSMA1/CUL3/PRKACA/SPTBN4/PSMD8/ERBB4/PPP2R5C/NEFL/DLG3/PPP2R1A/PSMA6	15
SESN3	AT8_up	GO:0048167	regulation of synaptic plasticity	12/374	191/18866	0.000445256	0.0311274	0.0271938	MAP1B/SNAP25/MPP2/SIPA1L1/EPHA4/YWHAG/NEUROD2/PRKCZ/APOE/SYP/MCTP1/CRTC1	12	hsa04140	Autophagy - animal	8/177	137/8111	0.0100834	0.0492754	0.0366486	MAPK3/AKT3/AKT3/PRKACA/PRKACA/VMP1/BAD/SH3GLB1/ATG2B/MAP3K7	8	R-HSA-1257604	PIP3 activates AKT signaling	13/240	264/10704	0.00654458	0.109989	0.0835524	MAPK3/PSMB7/JUN/PSMA1/AKT3/STUB1/PSMD8/ERBB4/PPP2R5C/BAD/PPP2R1A/PSMA6/TRIM27	13
OS9	AT8_up	GO:0030004	cellular monovalent inorganic cation homeostasis	9/374	114/18866	0.000446724	0.0311274	0.0271938	MAPK3/ATP6V0B/ATP6V1F/ATP1A1/SLC8A1/ATP6V0C/ATP6V0D1/ATP6V1G1/SLC9A1	9	hsa04910	Insulin signaling pathway	8/177	137/8111	0.0100834	0.0492754	0.0366486	CALM2/MAPK3/AKT3/AKT3/PRKACA/PRKACA/PRKCZ/BAD/PRKAG1/RHOQ	8	R-HSA-9604323	Negative regulation of NOTCH4 signaling	5/240	54/10704	0.00703205	0.109989	0.0835524	PSMB7/YWHAZ/PSMA1/PSMD8/PSMA6	5
TSPAN13	AT8_up	GO:0016236	macroautophagy	16/374	310/18866	0.000493602	0.0337569	0.029491	NRBP2/CHMP3/MAPK3/ATP6V0B/SESN3/PRKACA/VMP1/ATP6V0C/POLDIP2/ATP6V0D1/UCHL1/ATP6V1G1/PRKAG1/SH3GLB1/ATG2B/MAP3K7	16	hsa05130	Pathogenic Escherichia coli infection	10/177	197/8111	0.0109278	0.0524127	0.038982	MAPK3/JUN/TUBA1B/TUBB/TUBB/TUBB/TUBB/TUBB/TUBB/TUBB/TUBB/TUBB2A/CLDN5/ARPC3/SLC9A3R1/MAP3K7/FCGR2A	10	R-HSA-181429	Serotonin Neurotransmitter Release Cycle	3/240	18/10704	0.00708057	0.109989	0.0835524	SNAP25/SYT1/PPFIA2	3
PSMA1	AT8_up	GO:0015800	acidic amino acid transport	7/374	71/18866	0.000508749	0.0337681	0.0295008	SNAP25/SYT1/PPFIA2/CCK/SLC1A3/SLC9A3R1/GJA1	7	hsa04216	Ferroptosis	4/177	41/8111	0.0118356	0.0557348	0.0414528	VDAC3/ACSL6/FTL/ACSL1	4	R-HSA-181430	Norepinephrine Neurotransmitter Release Cycle	3/240	18/10704	0.00708057	0.109989	0.0835524	SNAP25/SYT1/PPFIA2	3
HPRT1	AT8_up	GO:0046390	ribose phosphate biosynthetic process	12/374	194/18866	0.000512053	0.0337681	0.0295008	HPRT1/ACSL6/COASY/TMSB4X/PKM/ACSL1/PID1/CYC1/ANTKMT/PANK3/IMPDH2/GUCY1A2	12	hsa04724	Glutamatergic synapse	7/177	114/8111	0.0121703	0.0562874	0.0418639	MAPK3/PRKACA/PRKACA/SLC1A3/GRIK5/GRIA2/PLCB1/GNAI1	7	R-HSA-190840	Microtubule-dependent trafficking of connexons from Golgi to the plasma membrane	3/240	18/10704	0.00708057	0.109989	0.0835524	TUBA1B/TUBB2A/GJA1	3
SC5D	AT8_up	GO:0031667	response to nutrient levels	21/374	473/18866	0.000528537	0.0342436	0.0299162	MAP1B/MAPK3/GDAP1/CCK/JUN/SESN3/ATP2B1/GSTP1/SLC8A1/SLC2A1/APOE/CADPS2/CDKN2D/BBS2/PKM/PRKAG1/BCKDHB/SH3GLB1/ACSL1/EIF2AK1/GAS2L1	21	hsa04152	AMPK signaling pathway	7/177	120/8111	0.0157936	0.071764	0.0533746	AKT3/AKT3/PPP2R5C/RAB10/PPP2R1A/PRKAG1/MAP3K7/PPP2R3C	7	R-HSA-8852276	The role of GTSE1 in G2/M progression after G2 checkpoint	6/240	77/10704	0.00751427	0.109989	0.0835524	PSMB7/PSMA1/TUBA1B/TUBB2A/PSMD8/PSMA6	6
ATP6V1F	AT8_up	GO:0008286	insulin receptor signaling pathway	10/374	143/18866	0.000574843	0.0361356	0.0315691	ATP6V0B/SESN3/ATP6V1F/AP3S1/PRKCZ/ATP6V0C/ATP6V0D1/ATP6V1G1/PID1/RHOQ	10	hsa05152	Tuberculosis	9/177	180/8111	0.0168784	0.0736938	0.0548099	CALM2/MAPK3/ATP6V0B/AKT3/AKT3/ATP6V0C/BAD/ATP6V0D1/HLA-DRA/HLA-DRA/HLA-DRA/HLA-DRA/HLA-DRA/HLA-DRA/HLA-DRA/FCGR2A	9	R-HSA-72689	Formation of a pool of free 40S subunits	7/240	101/10704	0.00753085	0.109989	0.0835524	EIF3G/RPL41/RPL30/RPL18A/RPL39/RPL12/RPS18	7
EPHA4	AT8_up	GO:0042391	regulation of membrane potential	20/374	443/18866	0.000579333	0.0361356	0.0315691	MPP2/CCK/JUN/ATP1A1/SLC8A1/KCNK1/MTLN/PRKCZ/GRIK5/CNIH2/GJA1/GLRA3/BAD/KCNIP2/KCNH1/YWHAE/SLC9A1/PID1/CRTC1/PPP2R3C	20	hsa04920	Adipocytokine signaling pathway	5/177	69/8111	0.0170719	0.0736938	0.0548099	ACSL6/AKT3/AKT3/SLC2A1/PRKAG1/ACSL1	5	R-HSA-9639288	Amino acids regulate mTORC1	5/240	55/10704	0.00759719	0.109989	0.0835524	ATP6V0B/ATP6V1F/ATP6V0C/ATP6V0D1/ATP6V1G1	5
VSNL1	AT8_up	GO:0006164	purine nucleotide biosynthetic process	12/374	197/18866	0.000587093	0.0361356	0.0315691	HPRT1/ACSL6/COASY/TMSB4X/PKM/ACSL1/PID1/CYC1/ANTKMT/PANK3/IMPDH2/GUCY1A2	12	hsa05211	Renal cell carcinoma	5/177	69/8111	0.0170719	0.0736938	0.0548099	MAPK3/JUN/AKT3/AKT3/SLC2A1/BAD	5	R-HSA-199977	ER to Golgi Anterograde Transport	9/240	154/10704	0.00782484	0.109989	0.0835524	TUBA1B/TRAPPC6A/SPTBN4/CNIH2/TUBB2A/YKT6/ARCN1/SAR1B/COG1	9
AP3S1	AT8_up	GO:1903747	regulation of establishment of protein localization to mitochondrion	7/374	73/18866	0.000602607	0.0364224	0.0318197	YWHAZ/YWHAG/UBL5/BAD/SH3GLB1/MICALL2/YWHAE	7	hsa03050	Proteasome	4/177	46/8111	0.0175388	0.074468	0.0553856	PSMB7/PSMA1/PSMD8/PSMA6	4	R-HSA-74752	Signaling by Insulin receptor	6/240	78/10704	0.00799191	0.109989	0.0835524	MAPK3/ATP6V0B/ATP6V1F/ATP6V0C/ATP6V0D1/ATP6V1G1	6
LMO4	AT8_up	GO:0010822	positive regulation of mitochondrion organization	9/374	119/18866	0.000611478	0.0364224	0.0318197	YWHAZ/YWHAG/UBL5/FAM162A/BAD/SH3GLB1/MICALL2/MIEF1/YWHAE	9	hsa05166	Human T-cell leukemia virus 1 infection	10/177	219/8111	0.021467	0.0884726	0.0658016	MAPK3/VDAC3/JUN/AKT3/AKT3/PRKACA/PRKACA/SLC2A1/B2M/B2M/ANAPC1/HLA-DRA/HLA-DRA/HLA-DRA/HLA-DRA/HLA-DRA/HLA-DRA/HLA-DRA/CRTC1	10	R-HSA-3700989	Transcriptional Regulation by TP53	16/240	365/10704	0.0081019	0.109989	0.0835524	RABGGTA/YWHAZ/JUN/SESN3/AKT3/YWHAG/COX6A1/COX8A/PPP2R5C/NELFE/SURF1/PPP2R1A/MEAF6/PRKAG1/YWHAE/POLR2E	16
ARHGDIG	AT8_up	GO:0001738	morphogenesis of a polarized epithelium	10/374	145/18866	0.000640817	0.036978	0.0323051	ASTN2/PSMB7/PSMA1/AP2A1/PSMD8/SLC9A3R1/RAB10/DLG3/PSMA6/MSN	10	hsa05030	Cocaine addiction	4/177	49/8111	0.0216588	0.0884726	0.0658016	JUN/PRKACA/PRKACA/GRIA2/GNAI1	4	R-HSA-5362768	Hh mutants that don't undergo autocatalytic processing are degraded by ERAD	5/240	56/10704	0.00819322	0.109989	0.0835524	PSMB7/OS9/PSMA1/PSMD8/PSMA6	5
ACSL6	AT8_up	GO:1904062	regulation of cation transmembrane transport	17/374	349/18866	0.000640831	0.036978	0.0323051	SNCA/CALM2/TSPAN13/PRKACA/CACNG8/SLC8A1/CNIH2/TMSB4X/S100A1/SLC9A3R1/GRIA2/NEFL/DLG3/KCNIP2/YWHAE/SLC9A1/ANTKMT	17	hsa04914	Progesterone-mediated oocyte maturation	6/177	100/8111	0.0218619	0.0884726	0.0658016	MAPK3/AKT3/AKT3/PRKACA/PRKACA/RPS6KA6/ANAPC1/GNAI1	6	R-HSA-5578775	Ion homeostasis	5/240	56/10704	0.00819322	0.109989	0.0835524	CALM2/ATP1A1/PRKACA/ATP2B1/SLC8A1	5
AKT3	AT8_up	GO:0050806	positive regulation of synaptic transmission	11/374	172/18866	0.000658342	0.0374039	0.0326772	SNAP25/CLSTN2/SYT1/MPP2/EPHA4/CACNG8/SLC1A3/PRKCZ/CLSTN3/APOE/CRTC1	11	hsa04926	Relaxin signaling pathway	7/177	129/8111	0.0225768	0.0899597	0.0669077	MAPK3/JUN/AKT3/AKT3/PRKACA/PRKACA/PRKCZ/PLCB1/GNAI1	7	R-HSA-190861	Gap junction assembly	4/240	36/10704	0.00826909	0.109989	0.0835524	TUBA1B/TUBB2A/GJA1/GJB6	4
TUBA1B	AT8_up	GO:0033572	transferrin transport	5/374	36/18866	0.000677713	0.0379211	0.033129	ATP6V0B/ATP6V1F/ATP6V0C/ATP6V0D1/ATP6V1G1	5	hsa04972	Pancreatic secretion	6/177	102/8111	0.0238397	0.0935527	0.0695799	CCK/ATP1A1/ATP2B1/PLCB1/RAB27B/SLC9A1	6	R-HSA-190872	Transport of connexons to the plasma membrane	3/240	19/10704	0.00827078	0.109989	0.0835524	TUBA1B/TUBB2A/GJA1	3
OPCML	AT8_up	GO:0010498	proteasomal protein catabolic process	21/374	483/18866	0.000691677	0.0381248	0.033307	PSMB7/ENC1/OS9/PSMA1/TRIM2/CUL3/PRKACA/FBXO2/RHBDD2/UBAC2/STUB1/PSMD8/APOE/PPP2R5C/UCHL1/PSMA6/FBXL15/ANAPC1/SELENOS/UBXN1/DESI1	21	hsa05140	Leishmaniasis	5/177	77/8111	0.026144	0.101064	0.0751667	MAPK3/JUN/HLA-DRA/HLA-DRA/HLA-DRA/HLA-DRA/HLA-DRA/HLA-DRA/HLA-DRA/MAP3K7/FCGR2A	5	R-HSA-8963898	Plasma lipoprotein assembly	3/240	19/10704	0.00827078	0.109989	0.0835524	PRKACA/APOE/SAR1B	3
YWHAG	AT8_up	GO:0000338	protein deneddylation	3/374	10/18866	0.000836156	0.0448417	0.0391751	COPS5/COPS3/GPS1	3	hsa05135	Yersinia infection	7/177	137/8111	0.0301068	0.112788	0.0838859	MAPK3/JUN/AKT3/AKT3/RPS6KA6/ARPC3/MAP3K7/FCGR2A	7	R-HSA-5576891	Cardiac conduction	8/240	129/10704	0.00846554	0.110923	0.0842623	CALM2/ATP1A1/PRKACA/ATP2B1/CACNG8/SLC8A1/KCNK1/KCNIP2	8
DYNLT3	AT8_up	GO:0010499	proteasomal ubiquitin-independent protein catabolic process	4/374	22/18866	0.000837823	0.0448417	0.0391751	PSMB7/ENC1/PSMA1/PSMA6	4	hsa00983	Drug metabolism - other enzymes	5/177	80/8111	0.030211	0.112788	0.0838859	HPRT1/GSTP1/MGST1/MGST3/IMPDH2	5	R-HSA-446203	Asparagine N-linked glycosylation	14/240	304/10704	0.00859467	0.110983	0.0843077	OS9/TUBA1B/TRAPPC6A/SPTBN4/CNIH2/TUBB2A/PMM1/NANS/YKT6/ARCN1/SAR1B/UBXN1/COG1/ALG9	14
SNAP91	AT8_up	GO:0035637	multicellular organismal signaling	12/374	206/18866	0.000869777	0.0451681	0.0394602	CALM2/ATP1A1/PRKACA/ATP2B1/CACNG8/SLC8A1/KCNK1/SPTBN4/GJA1/KCNIP2/YWHAE/SLC9A1	12	hsa04931	Insulin resistance	6/177	108/8111	0.0304831	0.112788	0.0838859	AKT3/AKT3/RPS6KA6/PRKCZ/SLC2A1/MLXIP/MLXIP/PRKAG1	6	R-HSA-4641258	Degradation of DVL	5/240	57/10704	0.00882092	0.112278	0.085291	PSMB7/PSMA1/CUL3/PSMD8/PSMA6	5
NPTX1	AT8_up	GO:0032412	regulation of ion transmembrane transporter activity	14/374	265/18866	0.00087276	0.0451681	0.0394602	CALM2/PRKACA/CACNG8/CNIH2/TMSB4X/S100A1/SLC9A3R1/GRIA2/NEFL/DLG3/KCNIP2/YWHAE/SLC9A1/ANTKMT	14	hsa04915	Estrogen signaling pathway	7/177	138/8111	0.0311539	0.113646	0.0845244	CALM2/MAPK3/JUN/AKT3/AKT3/PRKACA/PRKACA/PLCB1/GNAI1	7	R-HSA-8856825	Cargo recognition for clathrin-mediated endocytosis	7/240	106/10704	0.0097176	0.120832	0.091789	CLTB/SYT1/COPS5/COPS3/SNAP91/AP2A1/GPS1	7
FAM20B	AT8_up	GO:0060998	regulation of dendritic spine development	7/374	78/18866	0.000898065	0.0451681	0.0394602	SIPA1L1/PPFIA2/EPHA4/SRCIN1/APOE/LZTS3/DBNL	7	hsa05145	Toxoplasmosis	6/177	112/8111	0.0355266	0.127797	0.0950493	MAPK3/AKT3/AKT3/BAD/GNAI1/HLA-DRA/HLA-DRA/HLA-DRA/HLA-DRA/HLA-DRA/HLA-DRA/HLA-DRA/MAP3K7	6	R-HSA-5387390	Hh mutants abrogate ligand secretion	5/240	59/10704	0.0101745	0.120832	0.091789	PSMB7/OS9/PSMA1/PSMD8/PSMA6	5
ELAVL2	AT8_up	GO:0097120	receptor localization to synapse	6/374	57/18866	0.000902155	0.0451681	0.0394602	SNAP25/IQSEC2/CACNG8/PRKCZ/CNIH2/DLG3	6	hsa04012	ErbB signaling pathway	5/177	85/8111	0.0378334	0.134231	0.0998344	MAPK3/JUN/AKT3/AKT3/ERBB4/BAD	5	R-HSA-5673001	RAF/MAP kinase cascade	13/240	280/10704	0.010462	0.120832	0.091789	CALM2/MAPK3/PSMB7/PSMA1/CUL3/SPTBN4/PSMD8/ERBB4/PPP2R5C/NEFL/DLG3/PPP2R1A/PSMA6	13
CBX1	AT8_up	GO:0009165	nucleotide biosynthetic process	14/374	266/18866	0.000905075	0.0451681	0.0394602	NMNAT2/HPRT1/ACSL6/COASY/TMSB4X/PKM/NAXE/ACSL1/PID1/CYC1/ANTKMT/PANK3/IMPDH2/GUCY1A2	14	hsa05210	Colorectal cancer	5/177	86/8111	0.0394869	0.138204	0.10279	MAPK3/JUN/AKT3/AKT3/DCC/BAD	5	R-HSA-2454202	Fc epsilon receptor (FCERI) signaling	8/240	134/10704	0.0105276	0.120832	0.091789	CALM2/MAPK3/PSMB7/JUN/PSMA1/PSMD8/PSMA6/MAP3K7	8
ZRANB2	AT8_up	GO:0072522	purine-containing compound biosynthetic process	12/374	208/18866	0.000945998	0.0456876	0.0399141	HPRT1/ACSL6/COASY/TMSB4X/PKM/ACSL1/PID1/CYC1/ANTKMT/PANK3/IMPDH2/GUCY1A2	12	hsa05207	Chemical carcinogenesis - receptor activation	9/177	212/8111	0.0422927	0.146051	0.108625	MAPK3/JUN/AKT3/AKT3/PRKACA/PRKACA/RPS6KA6/MGST1/BAD/MGST3/GNAI1	9	R-HSA-1168372	Downstream signaling events of B Cell Receptor (BCR)	6/240	83/10704	0.0107125	0.120832	0.091789	CALM2/PSMB7/PSMA1/PSMD8/PSMA6/MAP3K7	6
MRPS24	AT8_up	GO:0022406	membrane docking	11/374	180/18866	0.000957884	0.0456876	0.0399141	SNAP25/SYT1/YWHAG/PRKACA/TUBB/RAB10/YKT6/PPP2R1A/RAB3C/YWHAE/MSN	11	hsa04144	Endocytosis	10/177	252/8111	0.0489389	0.166779	0.124042	CLTB/CHMP3/IQSEC2/AP2A1/PRKCZ/RAB11FIP4/ARPC3/RAB10/SNX1/SH3GLB1	10	R-HSA-195253	Degradation of beta-catenin by the destruction complex	6/240	83/10704	0.0107125	0.120832	0.091789	PSMB7/PSMA1/PSMD8/PPP2R5C/PPP2R1A/PSMA6	6
FGFR1OP2	AT8_up	GO:0009205	purine ribonucleoside triphosphate metabolic process	7/374	79/18866	0.000968909	0.0456876	0.0399141	TMSB4X/PKM/PID1/CYC1/ANTKMT/IMPDH2/RHOQ	7										R-HSA-5610780	Degradation of GLI1 by the proteasome	5/240	60/10704	0.010902	0.120832	0.091789	PSMB7/PSMA1/PRKACA/PSMD8/PSMA6	5
C5orf30	AT8_up	GO:0099601	regulation of neurotransmitter receptor activity	7/374	79/18866	0.000968909	0.0456876	0.0399141	LYNX1/NPTX1/CACNG8/CNIH2/GRIA2/NEFL/DLG3	7										R-HSA-5610783	Degradation of GLI2 by the proteasome	5/240	60/10704	0.010902	0.120832	0.091789	PSMB7/PSMA1/PRKACA/PSMD8/PSMA6	5
DOCK5	AT8_up	GO:0001662	behavioral fear response	5/374	39/18866	0.00098594	0.0456876	0.0399141	CCK/VDAC3/NEUROD2/APOE/GJA1	5										R-HSA-5610785	GLI3 is processed to GLI3R by the proteasome	5/240	60/10704	0.010902	0.120832	0.091789	PSMB7/PSMA1/PRKACA/PSMD8/PSMA6	5
UQCRC1	AT8_up	GO:2000272	negative regulation of signaling receptor activity	6/374	58/18866	0.000989712	0.0456876	0.0399141	LYNX1/LY6H/MTRNR2L8/MTRNR2L12/ERRFI1/LRPAP1	6										R-HSA-389513	CTLA4 inhibitory signaling	3/240	21/10704	0.0109847	0.120832	0.091789	AKT3/PPP2R5C/PPP2R1A	3
TMEM245	AT8_up	GO:1901293	nucleoside phosphate biosynthetic process	14/374	269/18866	0.00100813	0.0459634	0.040155	NMNAT2/HPRT1/ACSL6/COASY/TMSB4X/PKM/NAXE/ACSL1/PID1/CYC1/ANTKMT/PANK3/IMPDH2/GUCY1A2	14										R-HSA-442982	Ras activation upon Ca2+ influx through NMDA receptor	3/240	21/10704	0.0109847	0.120832	0.091789	CALM2/NEFL/DLG3	3
TRIM2	AT8_up	GO:0070498	interleukin-1-mediated signaling pathway	8/374	103/18866	0.00102379	0.0461079	0.0402812	MAPK3/PSMB7/PSMA1/TOLLIP/PSMD8/PLCB1/PSMA6/MAP3K7	8										R-HSA-5696399	Global Genome Nucleotide Excision Repair (GG-NER)	6/240	84/10704	0.0113266	0.123073	0.0934915	COPS5/COPS3/GPS1/PARP2/INO80E/INO80B	6
SRCIN1	AT8_up	GO:0000041	transition metal ion transport	9/374	129/18866	0.00109034	0.0481648	0.0420782	ATP6V0B/ATP6V1F/SLC39A12/FTL/ATP6V0C/B2M/ATP6V0D1/ATP6V1G1/PGRMC2	9										R-HSA-5678895	Defective CFTR causes cystic fibrosis	5/240	61/10704	0.0116641	0.125214	0.0951179	PSMB7/OS9/PSMA1/PSMD8/PSMA6	5
ATP1A1	AT8_up	GO:0002209	behavioral defense response	5/374	40/18866	0.0011087	0.0481648	0.0420782	CCK/VDAC3/NEUROD2/APOE/GJA1	5										R-HSA-5684996	MAPK1/MAPK3 signaling	13/240	286/10704	0.012331	0.127805	0.0970865	CALM2/MAPK3/PSMB7/PSMA1/CUL3/SPTBN4/PSMD8/ERBB4/PPP2R5C/NEFL/DLG3/PPP2R1A/PSMA6	13
TOLLIP	AT8_up	GO:0051650	establishment of vesicle localization	12/374	212/18866	0.0011152	0.0481648	0.0420782	PPFIA2/AP3S1/SNAP91/CUL3/TRAPPC6A/PRKCZ/CNIH2/YKT6/BBS2/TMEM230/RAB27B/SAR1B	12										R-HSA-156827	L13a-mediated translational silencing of Ceruloplasmin expression	7/240	111/10704	0.0123359	0.127805	0.0970865	EIF3G/RPL41/RPL30/RPL18A/RPL39/RPL12/RPS18	7
PGBD5	AT8_up	GO:0098883	synapse pruning	3/374	11/18866	0.00113287	0.0481648	0.0420782	EPHA4/C1QC/C1QB	3										R-HSA-5696398	Nucleotide Excision Repair	7/240	111/10704	0.0123359	0.127805	0.0970865	COPS5/COPS3/GPS1/PARP2/INO80E/INO80B/POLR2E	7
CABP1	AT8_up	GO:0009150	purine ribonucleotide metabolic process	18/374	401/18866	0.00114872	0.0481648	0.0420782	ACBD6/HPRT1/ACSL6/COASY/MVK/TMSB4X/BAD/PKM/PRKAG1/ACSL1/PID1/CYC1/ANTKMT/PANK3/IMPDH2/GUCY1A2/NUDT9/RHOQ	18										R-HSA-9617324	Negative regulation of NMDA receptor-mediated neuronal transmission	3/240	22/10704	0.012512	0.12814	0.0973409	CALM2/NEFL/DLG3	3
NDUFAF8	AT8_up	GO:1902414	protein localization to cell junction	8/374	105/18866	0.00116031	0.0481648	0.0420782	SNAP25/IQSEC2/CACNG8/PRKCZ/CNIH2/CLSTN3/DLG3/RAB27B	8										R-HSA-72706	GTP hydrolysis and joining of the 60S ribosomal subunit	7/240	112/10704	0.0129151	0.13049	0.0991259	EIF3G/RPL41/RPL30/RPL18A/RPL39/RPL12/RPS18	7
UBL5	AT8_up	GO:0044839	cell cycle G2/M phase transition	14/374	273/18866	0.00116075	0.0481648	0.0420782	PSMB7/PSMA1/YWHAG/PRKACA/TUBB/PSMD8/AKAP8/PLCB1/PPP2R1A/ARPP19/PPME1/PSMA6/FBXL15/YWHAE	14										R-HSA-9609736	Assembly and cell surface presentation of NMDA receptors	4/240	41/10704	0.0130344	0.13049	0.0991259	TUBA1B/TUBB2A/NEFL/DLG3	4
POLR1D	AT8_up	GO:2001257	regulation of cation channel activity	11/374	185/18866	0.00119675	0.0490286	0.0428329	CALM2/PRKACA/CACNG8/CNIH2/TMSB4X/S100A1/GRIA2/NEFL/DLG3/KCNIP2/ANTKMT	11										R-HSA-5610787	Hedgehog 'off' state	7/240	113/10704	0.0135137	0.132964	0.101005	PSMB7/PSMA1/TUBA1B/PRKACA/TUBB2A/PSMD8/PSMA6	7
CUL3	AT8_up	GO:1902930	regulation of alcohol biosynthetic process	7/374	82/18866	0.00120812	0.0490286	0.0428329	SNCA/SC5D/MVK/APOE/ADCYAP1R1/LSS/SEC14L2	7										R-HSA-5663202	Diseases of signal transduction by growth factor receptors and second messengers	16/240	387/10704	0.0136462	0.132964	0.101005	CALM2/MAPK3/PSMB7/OS9/PSMA1/AKT3/FGFR1OP2/PSMD8/ERBB4/PPP2R5C/NEURL1B/BAD/HDAC9/PPP2R1A/PSMA6/POLR2E	16
DROSHA	AT8_up	GO:0042596	fear response	5/374	41/18866	0.00124243	0.0498729	0.0435705	CCK/VDAC3/NEUROD2/APOE/GJA1	5										R-HSA-418346	Platelet homeostasis	6/240	88/10704	0.0140325	0.132964	0.101005	CALM2/ATP2B1/SLC8A1/PPP2R5C/PPP2R1A/GUCY1A2	6
NDUFS8	AT8_up	GO:0006469	negative regulation of protein kinase activity	13/374	246/18866	0.00131668	0.0522849	0.0456776	SNCA/YWHAG/SRCIN1/GSTP1/SLC8A1/GPS1/APOE/AIDA/UCHL1/PPP2R1A/CDKN2D/ERRFI1/TRIM27	13										R-HSA-212676	Dopamine Neurotransmitter Release Cycle	3/240	23/10704	0.0141548	0.132964	0.101005	SNAP25/SYT1/PPFIA2	3
FTO	AT8_up	GO:0014829	vascular associated smooth muscle contraction	4/374	25/18866	0.00138253	0.0524804	0.0458485	DOCK5/ATP2B1/SLC8A1/BBS2	4										R-HSA-174084	Autodegradation of Cdh1 by Cdh1:APC/C	5/240	64/10704	0.0141664	0.132964	0.101005	PSMB7/PSMA1/PSMD8/PSMA6/ANAPC1	5
ATXN7L3	AT8_up	GO:0097061	dendritic spine organization	7/374	84/18866	0.0013917	0.0524804	0.0458485	SIPA1L1/PPFIA2/EPHA4/SRCIN1/APOE/LZTS3/DBNL	7										R-HSA-927802	Nonsense-Mediated Decay (NMD)	7/240	115/10704	0.0147701	0.132964	0.101005	RPL41/RPL30/RPL18A/RPL39/RPL12/PPP2R1A/RPS18	7
NNAT	AT8_up	GO:0090150	establishment of protein localization to membrane	16/374	342/18866	0.00139533	0.0524804	0.0458485	SNAP25/YWHAZ/YWHAG/REEP1/RPL41/RPL30/RPL18A/RPL39/BAD/RAB10/RPL12/RPS18/BBS2/MIEF1/YWHAE/RILPL1	16										R-HSA-975957	Nonsense Mediated Decay (NMD) enhanced by the Exon Junction Complex (EJC)	7/240	115/10704	0.0147701	0.132964	0.101005	RPL41/RPL30/RPL18A/RPL39/RPL12/PPP2R1A/RPS18	7
COX6A1	AT8_up	GO:0048488	synaptic vesicle endocytosis	6/374	62/18866	0.00140687	0.0524804	0.0458485	SNCA/SYT1/SNCG/SNAP91/SYP/RAB27B	6										R-HSA-156902	Peptide chain elongation	6/240	89/10704	0.0147738	0.132964	0.101005	RPL41/RPL30/RPL18A/RPL39/RPL12/RPS18	6
MYDGF	AT8_up	GO:0060997	dendritic spine morphogenesis	6/374	62/18866	0.00140687	0.0524804	0.0458485	SIPA1L1/PPFIA2/EPHA4/SRCIN1/LZTS3/DBNL	6										R-HSA-192823	Viral mRNA Translation	6/240	89/10704	0.0147738	0.132964	0.101005	RPL41/RPL30/RPL18A/RPL39/RPL12/RPS18	6
SLC39A12	AT8_up	GO:0140238	presynaptic endocytosis	6/374	62/18866	0.00140687	0.0524804	0.0458485	SNCA/SYT1/SNCG/SNAP91/SYP/RAB27B	6										R-HSA-5687128	MAPK6/MAPK4 signaling	6/240	89/10704	0.0147738	0.132964	0.101005	PSMB7/JUN/PSMA1/PRKACA/PSMD8/PSMA6	6
TSPAN5	AT8_up	GO:0001933	negative regulation of protein phosphorylation	19/374	444/18866	0.00147475	0.0534697	0.0467127	SNCA/CALM2/JUN/YWHAG/SRCIN1/GSTP1/SLC8A1/RPS6KA6/PRKCZ/GPS1/APOE/SLC9A3R1/AIDA/UCHL1/PPP2R1A/CDKN2D/ERRFI1/PID1/TRIM27	19										R-HSA-5358346	Hedgehog ligand biogenesis	5/240	65/10704	0.0150746	0.134209	0.101951	PSMB7/OS9/PSMA1/PSMD8/PSMA6	5
SF3B6	AT8_up	GO:0045161	neuronal ion channel clustering	3/374	12/18866	0.00148838	0.0534697	0.0467127	SPTBN4/KCNIP2/MTCH1	3										R-HSA-9607240	FLT3 Signaling	13/240	294/10704	0.0152134	0.134209	0.101951	CALM2/MAPK3/PSMB7/PSMA1/CUL3/SPTBN4/PSMD8/ERBB4/PPP2R5C/NEFL/DLG3/PPP2R1A/PSMA6	13
IQSEC2	AT8_up	GO:0060081	membrane hyperpolarization	3/374	12/18866	0.00148838	0.0534697	0.0467127	ATP1A1/PRKCZ/CRTC1	3										R-HSA-1852241	Organelle biogenesis and maintenance	13/240	296/10704	0.0160087	0.13984	0.106229	CALM2/TUBA1B/YWHAG/PRKACA/TUBB/IMMT/TUBB2A/PPP2R1A/BBS2/PRKAG1/YWHAE/CRTC1/IFT43	13
PRKACA	AT8_up	GO:0009199	ribonucleoside triphosphate metabolic process	7/374	85/18866	0.0014913	0.0534697	0.0467127	TMSB4X/PKM/PID1/CYC1/ANTKMT/IMPDH2/RHOQ	7										R-HSA-8856828	Clathrin-mediated endocytosis	8/240	146/10704	0.0169696	0.142173	0.108001	CLTB/SYT1/COPS5/COPS3/SNAP91/AP2A1/GPS1/ARPC3	8
ATP2B1	AT8_up	GO:0010821	regulation of mitochondrion organization	11/374	191/18866	0.00154601	0.0548982	0.0479607	YWHAZ/YWHAG/UBL5/TMEM14A/FAM162A/BAD/SH3GLB1/MICALL2/MIEF1/YWHAE/PID1	11										R-HSA-1169091	Activation of NF-kappaB in B cells	5/240	67/10704	0.0170063	0.142173	0.108001	PSMB7/PSMA1/PSMD8/PSMA6/MAP3K7	5
AP2A1	AT8_up	GO:0071241	cellular response to inorganic substance	12/374	221/18866	0.0015891	0.0555193	0.0485033	SNCA/SYT1/MAPK3/JUN/MT1G/NSMCE3/NEUROD2/MT1M/BACE1/B2M/BAD/KCNH1	12										R-HSA-4086400	PCP/CE pathway	6/240	92/10704	0.0171601	0.142173	0.108001	CLTB/PSMB7/PSMA1/AP2A1/PSMD8/PSMA6	6
MERTK	AT8_up	GO:1900739	regulation of protein insertion into mitochondrial membrane involved in apoptotic signaling pathway	4/374	26/18866	0.0016086	0.0555193	0.0485033	YWHAZ/YWHAG/BAD/YWHAE	4										R-HSA-72613	Eukaryotic Translation Initiation	7/240	119/10704	0.0175294	0.142173	0.108001	EIF3G/RPL41/RPL30/RPL18A/RPL39/RPL12/RPS18	7
SLC25A11	AT8_up	GO:1900740	positive regulation of protein insertion into mitochondrial membrane involved in apoptotic signaling pathway	4/374	26/18866	0.0016086	0.0555193	0.0485033	YWHAZ/YWHAG/BAD/YWHAE	4										R-HSA-72737	Cap-dependent Translation Initiation	7/240	119/10704	0.0175294	0.142173	0.108001	EIF3G/RPL41/RPL30/RPL18A/RPL39/RPL12/RPS18	7
PDXP	AT8_up	GO:0046165	alcohol biosynthetic process	10/374	164/18866	0.00163882	0.0557307	0.048688	SNCA/MSMO1/SC5D/PDXP/MVK/APOE/ADCYAP1R1/LSS/SEC14L2/PPIP5K1	10										R-HSA-156842	Eukaryotic Translation Elongation	6/240	93/10704	0.0180112	0.142173	0.108001	RPL41/RPL30/RPL18A/RPL39/RPL12/RPS18	6
CACNG8	AT8_up	GO:0032388	positive regulation of intracellular transport	12/374	222/18866	0.00165071	0.0557307	0.048688	YWHAZ/YWHAG/UBL5/PRKACA/BAD/MLC1/SH3GLB1/MICALL2/MIEF1/YWHAE/SAR1B/MSN	12										R-HSA-163125	Post-translational modification: synthesis of GPI-anchored proteins	6/240	93/10704	0.0180112	0.142173	0.108001	LY6H/OPCML/LSAMP/NTNG2/NRN1/GPAA1	6
ISCA1	AT8_up	GO:0032507	maintenance of protein location in cell	6/374	64/18866	0.00166	0.0557307	0.048688	OS9/GRIK5/TMSB4X/GJA1/TMSB10/GPAA1	6										R-HSA-2408557	Selenocysteine synthesis	6/240	93/10704	0.0180112	0.142173	0.108001	RPL41/RPL30/RPL18A/RPL39/RPL12/RPS18	6
UQCRQ	AT8_up	GO:0009060	aerobic respiration	7/374	87/18866	0.00170711	0.0558817	0.0488199	UQCRC1/NDUFS8/COX6A1/COX8A/SDHA/SURF1/ACO1	7										R-HSA-72764	Eukaryotic Translation Termination	6/240	93/10704	0.0180112	0.142173	0.108001	RPL41/RPL30/RPL18A/RPL39/RPL12/RPS18	6
SPAG9	AT8_up	GO:0009144	purine nucleoside triphosphate metabolic process	7/374	87/18866	0.00170711	0.0558817	0.0488199	TMSB4X/PKM/PID1/CYC1/ANTKMT/IMPDH2/RHOQ	7										R-HSA-174154	APC/C:Cdc20 mediated degradation of Securin	5/240	68/10704	0.0180309	0.142173	0.108001	PSMB7/PSMA1/PSMD8/PSMA6/ANAPC1	5
SMARCE1	AT8_up	GO:0009259	ribonucleotide metabolic process	18/374	416/18866	0.00172595	0.0558817	0.0488199	ACBD6/HPRT1/ACSL6/COASY/MVK/TMSB4X/BAD/PKM/PRKAG1/ACSL1/PID1/CYC1/ANTKMT/PANK3/IMPDH2/GUCY1A2/NUDT9/RHOQ	18										R-HSA-5658442	Regulation of RAS by GAPs	5/240	68/10704	0.0180309	0.142173	0.108001	PSMB7/PSMA1/CUL3/PSMD8/PSMA6	5
GSTP1	AT8_up	GO:0055076	transition metal ion homeostasis	9/374	138/18866	0.0017465	0.0558817	0.0488199	SLC39A12/MT1G/FTL/MT1M/B2M/ATP6V0D1/ATP6V1G1/ACO1/EIF2AK1	9										R-HSA-8878166	Transcriptional regulation by RUNX2	7/240	121/10704	0.0190372	0.147532	0.112071	MAPK3/PSMB7/PSMA1/AKT3/STUB1/PSMD8/PSMA6	7
SLC8A1	AT8_up	GO:0000086	G2/M transition of mitotic cell cycle	13/374	254/18866	0.00175163	0.0558817	0.0488199	PSMB7/PSMA1/YWHAG/PRKACA/TUBB/PSMD8/PLCB1/PPP2R1A/ARPP19/PPME1/PSMA6/FBXL15/YWHAE	13										R-HSA-180024	DARPP-32 events	3/240	26/10704	0.0197852	0.147532	0.112071	CALM2/PRKACA/PPP2R1A	3
RABGAP1	AT8_up	GO:0009206	purine ribonucleoside triphosphate biosynthetic process	6/374	65/18866	0.00179884	0.0558817	0.0488199	TMSB4X/PKM/PID1/CYC1/ANTKMT/IMPDH2	6										R-HSA-975956	Nonsense Mediated Decay (NMD) independent of the Exon Junction Complex (EJC)	6/240	95/10704	0.0197993	0.147532	0.112071	RPL41/RPL30/RPL18A/RPL39/RPL12/RPS18	6
PIN4	AT8_up	GO:0035308	negative regulation of protein dephosphorylation	6/374	65/18866	0.00179884	0.0558817	0.0488199	PPP1R26/ARPP19/PPME1/PPP1R2/YWHAE/PPP1R11	6										R-HSA-168799	Neurotoxicity of clostridium toxins	2/240	10/10704	0.0200082	0.147532	0.112071	SNAP25/SYT1	2
RPS6KA6	AT8_up	GO:0035794	positive regulation of mitochondrial membrane permeability	6/374	65/18866	0.00179884	0.0558817	0.0488199	YWHAZ/YWHAG/TMEM14A/BAD/YWHAE/SLC9A1	6										R-HSA-2465910	MASTL Facilitates Mitotic Progression	2/240	10/10704	0.0200082	0.147532	0.112071	PPP2R1A/ARPP19	2
FBXO2	AT8_up	GO:0019080	viral gene expression	11/374	195/18866	0.00182218	0.0558817	0.0488199	JUN/EIF3G/RPL41/RPL30/RPL18A/RPL39/RPL12/NELFE/RPS18/TRIM27/POLR2E	11										R-HSA-450341	Activation of the AP-1 family of transcription factors	2/240	10/10704	0.0200082	0.147532	0.112071	MAPK3/JUN	2
SLC1A3	AT8_up	GO:1905475	regulation of protein localization to membrane	11/374	195/18866	0.00182218	0.0558817	0.0488199	YWHAZ/YWHAG/IQSEC2/PRKCZ/GPC1/BAD/NECAB2/MIEF1/YWHAE/PID1/RHOQ	11										R-HSA-8963888	Chylomicron assembly	2/240	10/10704	0.0200082	0.147532	0.112071	APOE/SAR1B	2
NDUFA7	AT8_up	GO:0035304	regulation of protein dephosphorylation	9/374	139/18866	0.00183559	0.0558817	0.0488199	CALM2/PPP1R26/PPP2R5C/PPP2R1A/ARPP19/PPME1/PPP1R2/YWHAE/PPP1R11	9										R-HSA-380259	Loss of Nlp from mitotic centrosomes	5/240	70/10704	0.0202007	0.147532	0.112071	YWHAG/PRKACA/TUBB/PPP2R1A/YWHAE	5
NDUFB4	AT8_up	GO:1902473	regulation of protein localization to synapse	4/374	27/18866	0.00185915	0.0558817	0.0488199	IQSEC2/PRKCZ/CNIH2/CLSTN3	4										R-HSA-380284	Loss of proteins required for interphase microtubule organization from the centrosome	5/240	70/10704	0.0202007	0.147532	0.112071	YWHAG/PRKACA/TUBB/PPP2R1A/YWHAE	5
BLVRB	AT8_up	GO:0008016	regulation of heart contraction	13/374	256/18866	0.00187719	0.0558817	0.0488199	CALM2/ATP1A1/PRKACA/ATP2B1/CACNG8/SLC8A1/KCNK1/SPTBN4/S100A1/GJA1/KCNIP2/YWHAE/SLC9A1	13										R-HSA-9635486	Infection with Mycobacterium tuberculosis	3/240	27/10704	0.0218981	0.158627	0.1205	MAPK3/B2M/TRIM27	3
WDR82	AT8_up	GO:1901028	regulation of mitochondrial outer membrane permeabilization involved in apoptotic signaling pathway	5/374	45/18866	0.00189883	0.0558817	0.0488199	YWHAZ/YWHAG/TMEM14A/BAD/YWHAE	5										R-HSA-202424	Downstream TCR signaling	6/240	98/10704	0.0227024	0.161648	0.122795	PSMB7/PSMA1/PSMD8/PSMA6/HLA-DRA/MAP3K7	6
MT1G	AT8_up	GO:0005513	detection of calcium ion	3/374	13/18866	0.00190661	0.0558817	0.0488199	CALM2/SYT1/KCNIP2	3										R-HSA-948021	Transport to the Golgi and subsequent modification	9/240	185/10704	0.0235168	0.161648	0.122795	TUBA1B/TRAPPC6A/SPTBN4/CNIH2/TUBB2A/YKT6/ARCN1/SAR1B/COG1	9
NEUROD6	AT8_up	GO:0071872	cellular response to epinephrine stimulus	3/374	13/18866	0.00190661	0.0558817	0.0488199	SNCA/PRKACA/SLC9A1	3										R-HSA-1236978	Cross-presentation of soluble exogenous antigens (endosomes)	4/240	49/10704	0.0237518	0.161648	0.122795	PSMB7/PSMA1/PSMD8/PSMA6	4
LSAMP	AT8_up	GO:0009145	purine nucleoside triphosphate biosynthetic process	6/374	66/18866	0.0019463	0.0565959	0.0494439	TMSB4X/PKM/PID1/CYC1/ANTKMT/IMPDH2	6										R-HSA-174184	Cdc20:Phospho-APC/C mediated degradation of Cyclin A	5/240	73/10704	0.0237647	0.161648	0.122795	PSMB7/PSMA1/PSMD8/PSMA6/ANAPC1	5
POP4	AT8_up	GO:0062012	regulation of small molecule metabolic process	19/374	456/18866	0.00199544	0.0575716	0.0502963	SNCA/PSMB7/PSMA1/SC5D/AP2A1/PSMD8/MVK/TMSB4X/APOE/ADCYAP1R1/BAD/LSS/ARPP19/PSMA6/PRKAG1/SEC14L2/PID1/SELENOS/ANTKMT	19										R-HSA-69017	CDK-mediated phosphorylation and removal of Cdc6	5/240	73/10704	0.0237647	0.161648	0.122795	PSMB7/PSMA1/PSMD8/PSMA6/ANAPC1	5
KLHDC3	AT8_up	GO:0032465	regulation of cytokinesis	7/374	90/18866	0.00207544	0.0594012	0.0518947	CALM2/CUL3/PDXP/PRPF40A/RAB11FIP4/SH3GLB1/KLHL9	7										R-HSA-8854518	AURKA Activation by TPX2	5/240	73/10704	0.0237647	0.161648	0.122795	YWHAG/PRKACA/TUBB/PPP2R1A/YWHAE	5
DNAJC7	AT8_up	GO:1905710	positive regulation of membrane permeability	6/374	67/18866	0.00210273	0.0594012	0.0518947	YWHAZ/YWHAG/TMEM14A/BAD/YWHAE/SLC9A1	6										R-HSA-8939902	Regulation of RUNX2 expression and activity	5/240	73/10704	0.0237647	0.161648	0.122795	PSMB7/PSMA1/STUB1/PSMD8/PSMA6	5
KCNK1	AT8_up	GO:0071280	cellular response to copper ion	4/374	28/18866	0.00213547	0.0594012	0.0518947	SNCA/MT1G/MT1M/BACE1	4										R-HSA-196025	Formation of annular gap junctions	2/240	11/10704	0.0240972	0.161648	0.122795	CLTB/GJA1	2
RHBDD2	AT8_up	GO:0099504	synaptic vesicle cycle	11/374	199/18866	0.00213733	0.0594012	0.0518947	SNCA/SNAP25/SYT1/SNCG/PPFIA2/SNAP91/GRIK5/BACE1/CADPS2/SYP/RAB27B	11										R-HSA-5661231	Metallothioneins bind metals	2/240	11/10704	0.0240972	0.161648	0.122795	MT1G/MT1M	2
TUBB	AT8_up	GO:0051648	vesicle localization	12/374	229/18866	0.00213928	0.0594012	0.0518947	PPFIA2/AP3S1/SNAP91/CUL3/TRAPPC6A/PRKCZ/CNIH2/YKT6/BBS2/TMEM230/RAB27B/SAR1B	12										R-HSA-76071	RNA Polymerase III Transcription Initiation From Type 3 Promoter	3/240	28/10704	0.0241292	0.161648	0.122795	POLR1D/POLR2E/SNAPC2	3
COX8A	AT8_up	GO:0030705	cytoskeleton-dependent intracellular transport	11/374	200/18866	0.00222266	0.0610265	0.0533146	MAP1B/PPFIA2/AP3S1/TUBA1B/TUBB/PRKCZ/CNIH2/NEFL/UCHL1/RAB27B/IFT43	11										R-HSA-174178	APC/C:Cdh1 mediated degradation of Cdc20 and other APC/C:Cdh1 targeted proteins in late mitosis/early G1	5/240	74/10704	0.0250371	0.162128	0.12316	PSMB7/PSMA1/PSMD8/PSMA6/ANAPC1	5
COASY	AT8_up	GO:0140056	organelle localization by membrane tethering	10/374	171/18866	0.00223086	0.0610265	0.0533146	SNAP25/SYT1/YWHAG/PRKACA/TUBB/RAB10/YKT6/PPP2R1A/RAB3C/YWHAE	10										R-HSA-179419	APC:Cdc20 mediated degradation of cell cycle proteins prior to satisfation of the cell cycle checkpoint	5/240	74/10704	0.0250371	0.162128	0.12316	PSMB7/PSMA1/PSMD8/PSMA6/ANAPC1	5
ZNF84	AT8_up	GO:0071496	cellular response to external stimulus	15/374	326/18866	0.00228456	0.0617502	0.0539469	MAPK3/GDAP1/JUN/SESN3/ATP1A1/ATP2B1/GSTP1/SLC2A1/GJA1/BAD/CADPS2/PRKAG1/SH3GLB1/SLC9A1/GAS2L1	15										R-HSA-211733	Regulation of activated PAK-2p34 by proteasome mediated degradation	4/240	50/10704	0.0253769	0.162128	0.12316	PSMB7/PSMA1/PSMD8/PSMA6	4
FTL	AT8_up	GO:0019693	ribose phosphate metabolic process	18/374	427/18866	0.00229076	0.0617502	0.0539469	ACBD6/HPRT1/ACSL6/COASY/MVK/TMSB4X/BAD/PKM/PRKAG1/ACSL1/PID1/CYC1/ANTKMT/PANK3/IMPDH2/GUCY1A2/NUDT9/RHOQ	18										R-HSA-5607764	CLEC7A (Dectin-1) signaling	6/240	101/10704	0.0258793	0.162128	0.12316	CALM2/PSMB7/PSMA1/PSMD8/PSMA6/MAP3K7	6
STMN2	AT8_up	GO:0043666	regulation of phosphoprotein phosphatase activity	8/374	117/18866	0.00231347	0.0619104	0.0540868	CALM2/PPP1R26/PPP2R5C/PPP2R1A/ARPP19/PPME1/PPP1R2/PPP1R11	8										R-HSA-6807878	COPI-mediated anterograde transport	6/240	101/10704	0.0258793	0.162128	0.12316	TUBA1B/SPTBN4/TUBB2A/YKT6/ARCN1/COG1	6
RRP12	AT8_up	GO:0106027	neuron projection organization	7/374	92/18866	0.00235321	0.0621865	0.054328	SIPA1L1/PPFIA2/EPHA4/SRCIN1/APOE/LZTS3/DBNL	7										R-HSA-9633012	Response of EIF2AK4 (GCN2) to amino acid deficiency	6/240	101/10704	0.0258793	0.162128	0.12316	RPL41/RPL30/RPL18A/RPL39/RPL12/RPS18	6
NSMCE3	AT8_up	GO:0010649	regulation of cell communication by electrical coupling	3/374	14/18866	0.00239114	0.0621865	0.054328	CALM2/SLC8A1/GJA1	3										R-HSA-68886	M Phase	16/240	418/10704	0.0260395	0.162128	0.12316	CHMP3/MAPK3/PSMB7/PSMA1/TUBA1B/YWHAG/PRKACA/TUBB/TUBB2A/PSMD8/PPP2R5C/PPP2R1A/ARPP19/PSMA6/ANAPC1/YWHAE	16
VMP1	AT8_up	GO:0051645	Golgi localization	3/374	14/18866	0.00239114	0.0621865	0.054328	YWHAZ/SLC9A3R1/ARCN1	3										R-HSA-8863795	Downregulation of ERBB2 signaling	3/240	29/10704	0.0264787	0.162128	0.12316	AKT3/STUB1/ERBB4	3
KATNAL1	AT8_up	GO:1904293	negative regulation of ERAD pathway	3/374	14/18866	0.00239114	0.0621865	0.054328	OS9/UBAC2/UBXN1	3										R-HSA-112310	Neurotransmitter release cycle	4/240	51/10704	0.0270674	0.162128	0.12316	SNAP25/SYT1/PPFIA2/SLC1A3	4
ASB1	AT8_up	GO:0099173	postsynapse organization	10/374	173/18866	0.00242837	0.0625471	0.054643	SIPA1L1/PPFIA2/EPHA4/SRCIN1/APOE/LZTS3/NEFL/DLG3/DBNL/NTNG2	10										R-HSA-350562	Regulation of ornithine decarboxylase (ODC)	4/240	51/10704	0.0270674	0.162128	0.12316	PSMB7/PSMA1/PSMD8/PSMA6	4
CCDC167	AT8_up	GO:0010882	regulation of cardiac muscle contraction by calcium ion signaling	4/374	29/18866	0.00243888	0.0625471	0.054643	CALM2/PRKACA/SLC8A1/SLC9A1	4										R-HSA-196854	Metabolism of vitamins and cofactors	9/240	190/10704	0.027336	0.162128	0.12316	CALM2/NMNAT2/COASY/MOCS2/GPC1/SLC2A1/APOE/NAXE/PANK3	9
REEP1	AT8_up	GO:0033157	regulation of intracellular protein transport	13/374	264/18866	0.00245612	0.0625548	0.0546498	YWHAZ/OS9/YWHAG/CABP1/UBL5/PRKACA/UBAC2/BAD/SH3GLB1/MICALL2/MIEF1/YWHAE/SAR1B	13										R-HSA-176409	APC/C:Cdc20 mediated degradation of mitotic proteins	5/240	76/10704	0.0277114	0.162128	0.12316	PSMB7/PSMA1/PSMD8/PSMA6/ANAPC1	5
MOCS2	AT8_up	GO:0010959	regulation of metal ion transport	17/374	396/18866	0.00248968	0.0629753	0.0550171	SNCA/CALM2/TSPAN13/ATP1A1/PRKACA/ATP2B1/SLC8A1/SPTBN4/S100A1/ADCYAP1R1/B2M/SLC9A3R1/GJA1/KCNIP2/YWHAE/SLC9A1/TRIM27	17										R-HSA-2467813	Separation of Sister Chromatids	9/240	191/10704	0.0281494	0.162128	0.12316	PSMB7/PSMA1/TUBA1B/TUBB2A/PSMD8/PPP2R5C/PPP2R1A/PSMA6/ANAPC1	9
NEUROD2	AT8_up	GO:0090382	phagosome maturation	5/374	48/18866	0.00253557	0.0636997	0.05565	ATP6V0B/ATP6V1F/ATP6V0C/ATP6V0D1/ATP6V1G1	5										R-HSA-382556	ABC-family proteins mediated transport	6/240	103/10704	0.028154	0.162128	0.12316	PSMB7/OS9/PSMA1/PSMD8/PSMA6/ABCD3	6
UBAC2	AT8_up	GO:0051656	establishment of organelle localization	18/374	432/18866	0.00259469	0.0647444	0.0565627	MAP1B/YWHAZ/PPFIA2/AP3S1/SNAP91/CUL3/TRAPPC6A/PRKCZ/CNIH2/SLC9A3R1/GJA1/NEFL/YKT6/UCHL1/BBS2/TMEM230/RAB27B/SAR1B	18										R-HSA-9020702	Interleukin-1 signaling	6/240	103/10704	0.028154	0.162128	0.12316	PSMB7/PSMA1/TOLLIP/PSMD8/PSMA6/MAP3K7	6
DPP9	AT8_up	GO:0007269	neurotransmitter secretion	10/374	175/18866	0.00263966	0.0649885	0.0567759	SNCA/SNAP25/SYT1/SNCG/PPFIA2/GRIK5/BACE1/CADPS2/SYP/MCTP1	10										R-HSA-190873	Gap junction degradation	2/240	12/10704	0.028495	0.162128	0.12316	CLTB/GJA1	2
MTLN	AT8_up	GO:0099643	signal release from synapse	10/374	175/18866	0.00263966	0.0649885	0.0567759	SNCA/SNAP25/SYT1/SNCG/PPFIA2/GRIK5/BACE1/CADPS2/SYP/MCTP1	10										R-HSA-9634600	Regulation of glycolysis by fructose 2,6-bisphosphate metabolism	2/240	12/10704	0.028495	0.162128	0.12316	PRKACA/PPP2R1A	2
NAP1L5	AT8_up	GO:0030641	regulation of cellular pH	7/374	94/18866	0.00265878	0.0650256	0.0568083	MAPK3/ATP6V0B/ATP6V1F/ATP6V0C/ATP6V0D1/ATP6V1G1/SLC9A1	7										R-HSA-180534	Vpu mediated degradation of CD4	4/240	52/10704	0.0288237	0.162128	0.12316	PSMB7/PSMA1/PSMD8/PSMA6	4
ERGIC3	AT8_up	GO:0051588	regulation of neurotransmitter transport	8/374	120/18866	0.00270895	0.0658169	0.0574996	SNCA/SYT1/SNCG/PPFIA2/GRIK5/BACE1/SYP/MCTP1	8										R-HSA-349425	Autodegradation of the E3 ubiquitin ligase COP1	4/240	52/10704	0.0288237	0.162128	0.12316	PSMB7/PSMA1/PSMD8/PSMA6	4
STUB1	AT8_up	GO:0001844	protein insertion into mitochondrial membrane involved in apoptotic signaling pathway	4/374	30/18866	0.00277065	0.0664497	0.0580525	YWHAZ/YWHAG/BAD/YWHAE	4										R-HSA-69601	Ubiquitin Mediated Degradation of Phosphorylated Cdc25A	4/240	52/10704	0.0288237	0.162128	0.12316	PSMB7/PSMA1/PSMD8/PSMA6	4
TRAPPC6A	AT8_up	GO:0033673	negative regulation of kinase activity	13/374	268/18866	0.00279631	0.0664497	0.0580525	SNCA/YWHAG/SRCIN1/GSTP1/SLC8A1/GPS1/APOE/AIDA/UCHL1/PPP2R1A/CDKN2D/ERRFI1/TRIM27	13										R-HSA-69610	p53-Independent DNA Damage Response	4/240	52/10704	0.0288237	0.162128	0.12316	PSMB7/PSMA1/PSMD8/PSMA6	4
SNX17	AT8_up	GO:0071901	negative regulation of protein serine/threonine kinase activity	9/374	148/18866	0.00281199	0.0664497	0.0580525	YWHAG/GSTP1/SLC8A1/GPS1/APOE/AIDA/UCHL1/PPP2R1A/CDKN2D	9										R-HSA-69613	p53-Independent G1/S DNA damage checkpoint	4/240	52/10704	0.0288237	0.162128	0.12316	PSMB7/PSMA1/PSMD8/PSMA6	4
PRKCZ	AT8_up	GO:0051668	localization within membrane	7/374	95/18866	0.00282254	0.0664497	0.0580525	CACNG8/GRIK5/CNIH2/APOE/DLG3/NAXE/RILPL1	7										R-HSA-75815	Ubiquitin-dependent degradation of Cyclin D	4/240	52/10704	0.0288237	0.162128	0.12316	PSMB7/PSMA1/PSMD8/PSMA6	4
SIVA1	AT8_up	GO:0009201	ribonucleoside triphosphate biosynthetic process	6/374	71/18866	0.00282497	0.0664497	0.0580525	TMSB4X/PKM/PID1/CYC1/ANTKMT/IMPDH2	6										R-HSA-418360	Platelet calcium homeostasis	3/240	30/10704	0.0289462	0.162128	0.12316	CALM2/ATP2B1/SLC8A1	3
MRPL28	AT8_up	GO:0016079	synaptic vesicle exocytosis	8/374	121/18866	0.00285189	0.0666584	0.0582348	SNCA/SNAP25/SYT1/PPFIA2/GRIK5/BACE1/CADPS2/SYP	8										R-HSA-176814	Activation of APC/C and APC/C:Cdc20 mediated degradation of mitotic proteins	5/240	77/10704	0.0291139	0.162128	0.12316	PSMB7/PSMA1/PSMD8/PSMA6/ANAPC1	5
RALY	AT8_up	GO:0006122	mitochondrial electron transport, ubiquinol to cytochrome c	3/374	15/18866	0.00294531	0.0675592	0.0590217	UQCRC1/UQCRQ/CYC1	3										R-HSA-5619084	ABC transporter disorders	5/240	77/10704	0.0291139	0.162128	0.12316	PSMB7/OS9/PSMA1/PSMD8/PSMA6	5
GRIK5	AT8_up	GO:0036376	sodium ion export across plasma membrane	3/374	15/18866	0.00294531	0.0675592	0.0590217	ATP1A1/SLC8A1/SLC9A1	3										R-HSA-9009391	Extra-nuclear estrogen signaling	5/240	77/10704	0.0291139	0.162128	0.12316	CALM2/MAPK3/AKT3/PRKCZ/GNAI1	5
NCALD	AT8_up	GO:2001171	positive regulation of ATP biosynthetic process	3/374	15/18866	0.00294531	0.0675592	0.0590217	TMSB4X/PID1/ANTKMT	3										R-HSA-422356	Regulation of insulin secretion	5/240	78/10704	0.0305607	0.162248	0.12325	SNAP25/PRKACA/SLC2A1/PLCB1/GNAI1	5
PRPF40A	AT8_up	GO:0019083	viral transcription	10/374	178/18866	0.00298397	0.0680235	0.0594273	JUN/RPL41/RPL30/RPL18A/RPL39/RPL12/NELFE/RPS18/TRIM27/POLR2E	10										R-HSA-169911	Regulation of Apoptosis	4/240	53/10704	0.0306463	0.162248	0.12325	PSMB7/PSMA1/PSMD8/PSMA6	4
IMMT	AT8_up	GO:0045540	regulation of cholesterol biosynthetic process	5/374	50/18866	0.00303802	0.0680992	0.0594935	SC5D/MVK/APOE/LSS/SEC14L2	5										R-HSA-72766	Translation	12/240	291/10704	0.0310254	0.162248	0.12325	MRPS24/MRPL28/EIF3G/RPL41/RPL30/RPL18A/RPL39/RPL12/RPS18/MRPL37/MRPL57/MRPS34	12
SDHA	AT8_up	GO:0106118	regulation of sterol biosynthetic process	5/374	50/18866	0.00303802	0.0680992	0.0594935	SC5D/MVK/APOE/LSS/SEC14L2	5										R-HSA-399719	Trafficking of AMPA receptors	3/240	31/10704	0.0315312	0.162248	0.12325	AP2A1/CACNG8/GRIA2	3
TMEM151B	AT8_up	GO:1903522	regulation of blood circulation	14/374	303/18866	0.00304261	0.0680992	0.0594935	CALM2/DOCK5/ATP1A1/PRKACA/ATP2B1/CACNG8/SLC8A1/KCNK1/SPTBN4/S100A1/GJA1/KCNIP2/YWHAE/SLC9A1	14										R-HSA-399721	Glutamate binding, activation of AMPA receptors and synaptic plasticity	3/240	31/10704	0.0315312	0.162248	0.12325	AP2A1/CACNG8/GRIA2	3
GPS1	AT8_up	GO:0035303	regulation of dephosphorylation	11/374	209/18866	0.00312204	0.0694559	0.0606788	CALM2/PPP1R26/PPP2R5C/DLG3/PPP2R1A/ARPP19/PPME1/PPP1R2/YWHAE/PPP1R11/PPP2R3C	11										R-HSA-450282	MAPK targets/ Nuclear events mediated by MAP kinases	3/240	31/10704	0.0315312	0.162248	0.12325	MAPK3/JUN/PPP2R1A	3
ATP6V0C	AT8_up	GO:0006163	purine nucleotide metabolic process	18/374	442/18866	0.00330438	0.0728978	0.0636857	ACBD6/HPRT1/ACSL6/COASY/MVK/TMSB4X/BAD/PKM/PRKAG1/ACSL1/PID1/CYC1/ANTKMT/PANK3/IMPDH2/GUCY1A2/NUDT9/RHOQ	18										R-HSA-5339562	Uptake and actions of bacterial toxins	3/240	31/10704	0.0315312	0.162248	0.12325	SNAP25/CALM2/SYT1	3
RAB11FIP4	AT8_up	GO:0072599	establishment of protein localization to endoplasmic reticulum	8/374	124/18866	0.00331623	0.0728978	0.0636857	PMM1/RPL41/RPL30/RPL18A/RPL39/RAB10/RPL12/RPS18	8										R-HSA-9668328	Sealing of the nuclear envelope (NE) by ESCRT-III	3/240	31/10704	0.0315312	0.162248	0.12325	CHMP3/TUBA1B/TUBB2A	3
SPTBN4	AT8_up	GO:0006835	dicarboxylic acid transport	7/374	98/18866	0.00336049	0.0734337	0.0641539	SNAP25/SYT1/PPFIA2/CCK/SLC25A11/SLC1A3/GJA1	7										R-HSA-168273	Influenza Viral RNA Transcription and Replication	7/240	135/10704	0.0322021	0.162248	0.12325	RPL41/RPL30/RPL18A/RPL39/RPL12/RPS18/POLR2E	7
PPP1R26	AT8_up	GO:0036465	synaptic vesicle recycling	6/374	74/18866	0.00347784	0.0755402	0.0659942	SNCA/SYT1/SNCG/SNAP91/SYP/RAB27B	6										R-HSA-180585	Vif-mediated degradation of APOBEC3G	4/240	54/10704	0.0325355	0.162248	0.12325	PSMB7/PSMA1/PSMD8/PSMA6	4
EIF3G	AT8_up	GO:0090316	positive regulation of intracellular protein transport	10/374	182/18866	0.0034978	0.0755402	0.0659942	YWHAZ/YWHAG/UBL5/PRKACA/BAD/SH3GLB1/MICALL2/MIEF1/YWHAE/SAR1B	10										R-HSA-6781823	Formation of TC-NER Pre-Incision Complex	4/240	54/10704	0.0325355	0.162248	0.12325	COPS5/COPS3/GPS1/POLR2E	4
NAP1L2	AT8_up	GO:0061684	chaperone-mediated autophagy	3/374	16/18866	0.00357215	0.0762541	0.0666178	SNCA/STUB1/GFAP	3										R-HSA-8854050	FBXL7 down-regulates AURKA during mitotic entry and in early mitosis	4/240	54/10704	0.0325355	0.162248	0.12325	PSMB7/PSMA1/PSMD8/PSMA6	4
TMEM14A	AT8_up	GO:0071871	response to epinephrine	3/374	16/18866	0.00357215	0.0762541	0.0666178	SNCA/PRKACA/SLC9A1	3										R-HSA-202670	ERKs are inactivated	2/240	13/10704	0.0331858	0.162248	0.12325	MAPK3/PPP2R1A	2
CNIH2	AT8_up	GO:0006695	cholesterol biosynthetic process	6/374	75/18866	0.00371855	0.0780261	0.068166	MSMO1/SC5D/MVK/APOE/LSS/SEC14L2	6										R-HSA-425561	Sodium/Calcium exchangers	2/240	13/10704	0.0331858	0.162248	0.12325	CALM2/SLC8A1	2
TUBB2A	AT8_up	GO:0046323	glucose import	6/374	75/18866	0.00371855	0.0780261	0.068166	SLC2A1/ARPP19/RTN2/PID1/SELENOS/RHOQ	6										R-HSA-5140745	WNT5A-dependent internalization of FZD2, FZD5 and ROR2	2/240	13/10704	0.0331858	0.162248	0.12325	CLTB/AP2A1	2
GPC1	AT8_up	GO:1902653	secondary alcohol biosynthetic process	6/374	75/18866	0.00371855	0.0780261	0.068166	MSMO1/SC5D/MVK/APOE/LSS/SEC14L2	6										R-HSA-397014	Muscle contraction	9/240	197/10704	0.0333903	0.162248	0.12325	CALM2/ATP1A1/PRKACA/ATP2B1/CACNG8/SLC8A1/KCNK1/KCNIP2/GUCY1A2	9
MT1M	AT8_up	GO:0036503	ERAD pathway	7/374	100/18866	0.00376031	0.0784567	0.0685421	OS9/FBXO2/RHBDD2/UBAC2/STUB1/SELENOS/UBXN1	7										R-HSA-1251985	Nuclear signaling by ERBB4	3/240	32/10704	0.0342332	0.162248	0.12325	GFAP/APOE/ERBB4	3
PSMD8	AT8_up	GO:0050773	regulation of dendrite development	9/374	155/18866	0.00382383	0.079182	0.0691758	SIPA1L1/PPFIA2/EPHA4/SRCIN1/APOE/DCC/LZTS3/DBNL/CRTC1	9										R-HSA-5626467	RHO GTPases activate IQGAPs	3/240	32/10704	0.0342332	0.162248	0.12325	CALM2/TUBA1B/TUBB2A	3
BACE1	AT8_up	GO:0042326	negative regulation of phosphorylation	19/374	484/18866	0.00383796	0.079182	0.0691758	SNCA/CALM2/JUN/YWHAG/SRCIN1/GSTP1/SLC8A1/RPS6KA6/PRKCZ/GPS1/APOE/SLC9A3R1/AIDA/UCHL1/PPP2R1A/CDKN2D/ERRFI1/PID1/TRIM27	19										R-HSA-163685	Integration of energy metabolism	6/240	108/10704	0.0344072	0.162248	0.12325	SNAP25/PRKACA/SLC2A1/PLCB1/PPP2R1A/GNAI1	6
TBL3	AT8_up	GO:0033555	multicellular organismal response to stress	6/374	76/18866	0.0039714	0.0812175	0.070954	CCK/VDAC3/NEUROD2/APOE/ADCYAP1R1/GJA1	6										R-HSA-112043	PLC beta mediated events	4/240	55/10704	0.0344914	0.162248	0.12325	CALM2/PRKACA/PLCB1/GNAI1	4
CLPTM1	AT8_up	GO:0006865	amino acid transport	9/374	156/18866	0.00398906	0.0812175	0.070954	SNAP25/SYT1/PPFIA2/CCK/SLC1A3/SLC9A3R1/GJA1/SLC25A38/SFXN5	9										R-HSA-1655829	Regulation of cholesterol biosynthesis by SREBP (SREBF)	4/240	55/10704	0.0344914	0.162248	0.12325	SC5D/MVK/LSS/SAR1B	4
CLVS1	AT8_up	GO:0006401	RNA catabolic process	17/374	415/18866	0.00400259	0.0812175	0.070954	PSMB7/YWHAZ/PSMA1/DROSHA/FTO/PSMD8/RNASET2/RPL41/RPL30/RPL18A/RPL39/FASTKD1/RPL12/PPP2R1A/RPS18/PSMA6/HNRNPA0	17										R-HSA-174113	SCF-beta-TrCP mediated degradation of Emi1	4/240	55/10704	0.0344914	0.162248	0.12325	PSMB7/PSMA1/PSMD8/PSMA6	4
CLSTN3	AT8_up	GO:0060996	dendritic spine development	7/374	102/18866	0.00419528	0.0846621	0.0739633	SIPA1L1/PPFIA2/EPHA4/SRCIN1/APOE/LZTS3/DBNL	7										R-HSA-4641257	Degradation of AXIN	4/240	55/10704	0.0344914	0.162248	0.12325	PSMB7/PSMA1/PSMD8/PSMA6	4
RNASET2	AT8_up	GO:0046902	regulation of mitochondrial membrane permeability	6/374	77/18866	0.00423675	0.0848826	0.074156	YWHAZ/YWHAG/TMEM14A/BAD/YWHAE/SLC9A1	6										R-HSA-6794361	Neurexins and neuroligins	4/240	55/10704	0.0344914	0.162248	0.12325	SYT1/SIPA1L1/DLG3/DBNL	4
PMM1	AT8_up	GO:0006754	ATP biosynthetic process	5/374	54/18866	0.00425218	0.0848826	0.074156	TMSB4X/PKM/PID1/CYC1/ANTKMT	5										R-HSA-6799198	Complex I biogenesis	4/240	55/10704	0.0344914	0.162248	0.12325	NDUFS8/NDUFA7/NDUFB4/NDUFB5	4
SLC2A1	AT8_up	GO:0006885	regulation of pH	7/374	103/18866	0.00442653	0.0875198	0.0764599	MAPK3/ATP6V0B/ATP6V1F/ATP6V0C/ATP6V0D1/ATP6V1G1/SLC9A1	7										R-HSA-8941858	Regulation of RUNX3 expression and activity	4/240	55/10704	0.0344914	0.162248	0.12325	PSMB7/PSMA1/PSMD8/PSMA6	4
MVK	AT8_up	GO:0016579	protein deubiquitination	13/374	283/18866	0.00443168	0.0875198	0.0764599	COPS5/PSMB7/PSMA1/ATXN7L3/PSMD8/UCHL1/PSMA6/INO80E/UCHL3/INO80B/UBXN1/MAP3K7/MINDY3	13										R-HSA-176408	Regulation of APC/C activators between G1/S and early anaphase	5/240	81/10704	0.0351689	0.162248	0.12325	PSMB7/PSMA1/PSMD8/PSMA6/ANAPC1	5
MTRNR2L8	AT8_up	GO:0055067	monovalent inorganic cation homeostasis	9/374	159/18866	0.00451842	0.088075	0.076945	MAPK3/ATP6V0B/ATP6V1F/ATP1A1/SLC8A1/ATP6V0C/ATP6V0D1/ATP6V1G1/SLC9A1	9										R-HSA-195721	Signaling by WNT	13/240	332/10704	0.036387	0.162248	0.12325	CALM2/CLTB/PSMB7/YWHAZ/PSMA1/CUL3/AP2A1/PSMD8/PPP2R5C/PLCB1/PPP2R1A/PSMA6/MAP3K7	13
GFAP	AT8_up	GO:0043270	positive regulation of ion transport	13/374	284/18866	0.00456351	0.088075	0.076945	SNCA/CALM2/SYT1/CCK/ATP2B1/TMSB4X/S100A1/APOE/ADCYAP1R1/SLC9A3R1/KCNIP2/SLC9A1/ANTKMT	13										R-HSA-112040	G-protein mediated events	4/240	56/10704	0.0365143	0.162248	0.12325	CALM2/PRKACA/PLCB1/GNAI1	4
TMSB4X	AT8_up	GO:0099003	vesicle-mediated transport in synapse	11/374	220/18866	0.00459586	0.088075	0.076945	SNCA/SNAP25/SYT1/SNCG/PPFIA2/SNAP91/GRIK5/BACE1/CADPS2/SYP/RAB27B	11										R-HSA-450408	AUF1 (hnRNP D0) binds and destabilizes mRNA	4/240	56/10704	0.0365143	0.162248	0.12325	PSMB7/PSMA1/PSMD8/PSMA6	4
CLDN5	AT8_up	GO:0006120	mitochondrial electron transport, NADH to ubiquinone	5/374	55/18866	0.00460289	0.088075	0.076945	SNCA/NDUFS8/NDUFA7/NDUFB4/NDUFB5	5										R-HSA-2871837	FCERI mediated NF-kB activation	5/240	82/10704	0.0367953	0.162248	0.12325	PSMB7/PSMA1/PSMD8/PSMA6/MAP3K7	5
C1QC	AT8_up	GO:0051452	intracellular pH reduction	5/374	55/18866	0.00460289	0.088075	0.076945	ATP6V0B/ATP6V1F/ATP6V0C/ATP6V0D1/ATP6V1G1	5										R-HSA-380270	Recruitment of mitotic centrosome proteins and complexes	5/240	82/10704	0.0367953	0.162248	0.12325	YWHAG/PRKACA/TUBB/PPP2R1A/YWHAE	5
ARPC3	AT8_up	GO:0097345	mitochondrial outer membrane permeabilization	5/374	55/18866	0.00460289	0.088075	0.076945	YWHAZ/YWHAG/TMEM14A/BAD/YWHAE	5										R-HSA-380287	Centrosome maturation	5/240	82/10704	0.0367953	0.162248	0.12325	YWHAG/PRKACA/TUBB/PPP2R1A/YWHAE	5
C1QB	AT8_up	GO:0051924	regulation of calcium ion transport	12/374	253/18866	0.00478293	0.0901023	0.0787161	SNCA/CALM2/TSPAN13/PRKACA/ATP2B1/SLC8A1/S100A1/ADCYAP1R1/GJA1/YWHAE/SLC9A1/TRIM27	12										R-HSA-9013694	Signaling by NOTCH4	5/240	82/10704	0.0367953	0.162248	0.12325	PSMB7/YWHAZ/PSMA1/PSMD8/PSMA6	5
S100A1	AT8_up	GO:0010827	regulation of glucose transmembrane transport	6/374	79/18866	0.00480643	0.0901023	0.0787161	SLC2A1/ARPP19/RTN2/PID1/SELENOS/RHOQ	6										R-HSA-5617833	Cilium Assembly	9/240	201/10704	0.0372383	0.162248	0.12325	TUBA1B/YWHAG/PRKACA/TUBB/TUBB2A/PPP2R1A/BBS2/YWHAE/IFT43	9
RPL41	AT8_up	GO:0043407	negative regulation of MAP kinase activity	6/374	79/18866	0.00480643	0.0901023	0.0787161	GSTP1/GPS1/APOE/AIDA/UCHL1/PPP2R1A	6										R-HSA-166786	Creation of C4 and C2 activators	2/240	14/10704	0.0381544	0.162248	0.12325	C1QC/C1QB	2
APOE	AT8_up	GO:0071260	cellular response to mechanical stimulus	6/374	79/18866	0.00480643	0.0901023	0.0787161	MAPK3/ATP1A1/SLC2A1/GJA1/BAD/SLC9A1	6										R-HSA-198323	AKT phosphorylates targets in the cytosol	2/240	14/10704	0.0381544	0.162248	0.12325	AKT3/BAD	2
ERBB4	AT8_up	GO:1901030	positive regulation of mitochondrial outer membrane permeabilization involved in apoptotic signaling pathway	4/374	35/18866	0.00489821	0.0901788	0.0787829	YWHAZ/YWHAG/BAD/YWHAE	4										R-HSA-442720	CREB1 phosphorylation through the activation of Adenylate Cyclase	2/240	14/10704	0.0381544	0.162248	0.12325	CALM2/PRKACA	2
ADCYAP1R1	AT8_up	GO:0017157	regulation of exocytosis	11/374	222/18866	0.00491511	0.0901788	0.0787829	SNCA/SYT1/PPFIA2/VSNL1/GRIK5/BACE1/RAB10/CADPS2/SYP/RAB3C/RAB27B	11										R-HSA-4839735	AXIN mutants destabilize the destruction complex, activating WNT signaling	2/240	14/10704	0.0381544	0.162248	0.12325	PPP2R5C/PPP2R1A	2
RPL30	AT8_up	GO:0043161	proteasome-mediated ubiquitin-dependent protein catabolic process	17/374	424/18866	0.00494743	0.0901788	0.0787829	PSMB7/OS9/PSMA1/TRIM2/CUL3/FBXO2/RHBDD2/STUB1/PSMD8/PPP2R5C/UCHL1/PSMA6/FBXL15/ANAPC1/SELENOS/UBXN1/DESI1	17										R-HSA-4839744	truncated APC mutants destabilize the destruction complex	2/240	14/10704	0.0381544	0.162248	0.12325	PPP2R5C/PPP2R1A	2
FAM162A	AT8_up	GO:0086065	cell communication involved in cardiac conduction	5/374	56/18866	0.0049737	0.0901788	0.0787829	CALM2/ATP1A1/PRKACA/SLC8A1/GJA1	5										R-HSA-4839748	AMER1 mutants destabilize the destruction complex	2/240	14/10704	0.0381544	0.162248	0.12325	PPP2R5C/PPP2R1A	2
PPP2R5C	AT8_up	GO:0021700	developmental maturation	13/374	287/18866	0.00497807	0.0901788	0.0787829	MAP1B/YWHAZ/PRKACA/NEUROD2/SPTBN4/NEFL/SYP/PPP2R1A/ARCN1/KCNIP2/WDR77/ANKS1A/MTCH1	13										R-HSA-5467337	APC truncation mutants have impaired AXIN binding	2/240	14/10704	0.0381544	0.162248	0.12325	PPP2R5C/PPP2R1A	2
B2M	AT8_up	GO:0060047	heart contraction	13/374	287/18866	0.00497807	0.0901788	0.0787829	CALM2/ATP1A1/PRKACA/ATP2B1/CACNG8/SLC8A1/KCNK1/SPTBN4/S100A1/GJA1/KCNIP2/YWHAE/SLC9A1	13										R-HSA-5467340	AXIN missense mutants destabilize the destruction complex	2/240	14/10704	0.0381544	0.162248	0.12325	PPP2R5C/PPP2R1A	2
CHI3L1	AT8_up	GO:0006883	cellular sodium ion homeostasis	3/374	18/18866	0.0050547	0.0901788	0.0787829	ATP1A1/SLC8A1/SLC9A1	3										R-HSA-5467348	Truncations of AMER1 destabilize the destruction complex	2/240	14/10704	0.0381544	0.162248	0.12325	PPP2R5C/PPP2R1A	2
MGST1	AT8_up	GO:0035994	response to muscle stretch	3/374	18/18866	0.0050547	0.0901788	0.0787829	JUN/SLC8A1/SLC9A1	3										R-HSA-5660526	Response to metal ions	2/240	14/10704	0.0381544	0.162248	0.12325	MT1G/MT1M	2
TMEM132A	AT8_up	GO:1902683	regulation of receptor localization to synapse	3/374	18/18866	0.0050547	0.0901788	0.0787829	IQSEC2/PRKCZ/CNIH2	3										R-HSA-9005891	Loss of function of MECP2 in Rett syndrome	2/240	14/10704	0.0381544	0.162248	0.12325	CALM2/PRKACA	2
RPL18A	AT8_up	GO:2000641	regulation of early endosome to late endosome transport	3/374	18/18866	0.0050547	0.0901788	0.0787829	CHMP3/MAPK3/MSN	3										R-HSA-9005895	Pervasive developmental disorders	2/240	14/10704	0.0381544	0.162248	0.12325	CALM2/PRKACA	2
NEURL1B	AT8_up	GO:0046928	regulation of neurotransmitter secretion	7/374	106/18866	0.00517827	0.0919392	0.0803208	SYT1/SNCG/PPFIA2/GRIK5/BACE1/SYP/MCTP1	7										R-HSA-9675151	Disorders of Developmental Biology	2/240	14/10704	0.0381544	0.162248	0.12325	CALM2/PRKACA	2
SLC9A3R1	AT8_up	GO:0071248	cellular response to metal ion	10/374	193/18866	0.00527925	0.0932329	0.0814511	SNCA/SYT1/MAPK3/JUN/MT1G/NEUROD2/MT1M/BACE1/B2M/KCNH1	10										R-HSA-9697154	Disorders of Nervous System Development	2/240	14/10704	0.0381544	0.162248	0.12325	CALM2/PRKACA	2
GJA1	AT8_up	GO:0022604	regulation of cell morphogenesis	19/374	499/18866	0.00530163	0.0932329	0.0814511	MAP1B/SYT1/SIPA1L1/SEMA6B/PPFIA2/EPHA4/DOCK5/SRCIN1/PRPF40A/APOE/SLC9A3R1/DCC/LZTS3/NEFL/DBNL/NTNG2/ZMYM3/MSN/RHOQ	19										R-HSA-1236974	ER-Phagosome pathway	5/240	83/10704	0.0384673	0.162248	0.12325	PSMB7/PSMA1/PSMD8/B2M/PSMA6	5
GLRA3	AT8_up	GO:2000310	regulation of NMDA receptor activity	4/374	36/18866	0.00542577	0.0944746	0.0825358	CNIH2/GRIA2/NEFL/DLG3	4										R-HSA-69202	Cyclin E associated events during G1/S transition	5/240	83/10704	0.0384673	0.162248	0.12325	PSMB7/PSMA1/AKT3/PSMD8/PSMA6	5
RPL39	AT8_up	GO:0016126	sterol biosynthetic process	6/374	81/18866	0.00543051	0.0944746	0.0825358	MSMO1/SC5D/MVK/APOE/LSS/SEC14L2	6										R-HSA-69541	Stabilization of p53	4/240	57/10704	0.0386044	0.162248	0.12325	PSMB7/PSMA1/PSMD8/PSMA6	4
DCC	AT8_up	GO:0099175	regulation of postsynapse organization	7/374	107/18866	0.00544898	0.0944746	0.0825358	SIPA1L1/PPFIA2/EPHA4/SRCIN1/APOE/LZTS3/DBNL	7										R-HSA-983169	Class I MHC mediated antigen processing & presentation	14/240	370/10704	0.0390829	0.163488	0.124192	PSMB7/PSMA1/CUL3/FBXO2/ASB1/STUB1/PSMD8/B2M/LRRC41/PSMA6/FBXL15/ANAPC1/KLHL9/SAR1B	14
FCGRT	AT8_up	GO:0051235	maintenance of location	14/374	324/18866	0.00547897	0.0945507	0.0826023	SNCA/CALM2/OS9/FTO/PRKACA/SLC8A1/FTL/MTLN/GRIK5/TMSB4X/APOE/GJA1/TMSB10/GPAA1	14										R-HSA-68882	Mitotic Anaphase	10/240	236/10704	0.0399703	0.165039	0.125371	CHMP3/PSMB7/PSMA1/TUBA1B/TUBB2A/PSMD8/PPP2R5C/PPP2R1A/PSMA6/ANAPC1	10
BAD	AT8_up	GO:0070997	neuron death	15/374	360/18866	0.00572154	0.097881	0.0855118	SNCA/NRBP2/SNCG/JUN/TRIM2/GRIK5/BACE1/APOE/FAM162A/DCC/BAD/NEFL/PARP2/SLC9A1/RILPL1	15										R-HSA-1799339	SRP-dependent cotranslational protein targeting to membrane	6/240	112/10704	0.0400096	0.165039	0.125371	RPL41/RPL30/RPL18A/RPL39/RPL12/RPS18	6
FASTKD1	AT8_up	GO:0016482	cytosolic transport	9/374	165/18866	0.00574019	0.097881	0.0855118	CHMP3/MAPK3/PPFIA2/AP2A1/SPAG9/YKT6/SNX1/TRIM27/MSN	9										R-HSA-983705	Signaling by the B Cell Receptor (BCR)	6/240	112/10704	0.0400096	0.165039	0.125371	CALM2/PSMB7/PSMA1/PSMD8/PSMA6/MAP3K7	6
RAB10	AT8_up	GO:0009142	nucleoside triphosphate biosynthetic process	6/374	82/18866	0.00576385	0.097881	0.0855118	TMSB4X/PKM/PID1/CYC1/ANTKMT/IMPDH2	6										R-HSA-5621481	C-type lectin receptors (CLRs)	7/240	142/10704	0.0406378	0.166859	0.126753	CALM2/PSMB7/PSMA1/PRKACA/PSMD8/PSMA6/MAP3K7	7
RPL12	AT8_up	GO:0045851	pH reduction	5/374	58/18866	0.00577797	0.097881	0.0855118	ATP6V0B/ATP6V1F/ATP6V0C/ATP6V0D1/ATP6V1G1	5										R-HSA-2555396	Mitotic Metaphase and Anaphase	10/240	237/10704	0.0409446	0.167347	0.127124	CHMP3/PSMB7/PSMA1/TUBA1B/TUBB2A/PSMD8/PPP2R5C/PPP2R1A/PSMA6/ANAPC1	10
HDAC9	AT8_up	GO:0150146	cell junction disassembly	3/374	19/18866	0.00591522	0.0997484	0.0871432	EPHA4/C1QC/C1QB	3										R-HSA-5632684	Hedgehog 'on' state	5/240	85/10704	0.0419488	0.168074	0.127676	PSMB7/PSMA1/CUL3/PSMD8/PSMA6	5
GRIA2	AT8_up	GO:0098926	postsynaptic signal transduction	4/374	37/18866	0.00598999	0.10055	0.0878436	LY6H/PLCB1/RGS10/CRTC1	4										R-HSA-69656	Cyclin A:Cdk2-associated events at S phase entry	5/240	85/10704	0.0419488	0.168074	0.127676	PSMB7/PSMA1/AKT3/PSMD8/PSMA6	5
MTRNR2L12	AT8_up	GO:0006898	receptor-mediated endocytosis	14/374	328/18866	0.00608516	0.101672	0.0888238	SNCA/SNAP25/CLTB/SNAP91/AP2A1/CACNG8/SNX17/APOE/B2M/NECAB2/DBNL/LRPAP1/SNX1/SCYL2	14										R-HSA-351202	Metabolism of polyamines	4/240	59/10704	0.0429862	0.168074	0.127676	PSMB7/PSMA1/PSMD8/PSMA6	4
PLD3	AT8_up	GO:0031145	anaphase-promoting complex-dependent catabolic process	6/374	83/18866	0.00611189	0.101672	0.0888238	PSMB7/PSMA1/CUL3/PSMD8/PSMA6/ANAPC1	6										R-HSA-5676590	NIK-->noncanonical NF-kB signaling	4/240	59/10704	0.0429862	0.168074	0.127676	PSMB7/PSMA1/PSMD8/PSMA6	4
LZTS3	AT8_up	GO:0006836	neurotransmitter transport	11/374	229/18866	0.00617316	0.10197	0.0890841	SNCA/SNAP25/SYT1/SNCG/PPFIA2/SLC1A3/GRIK5/BACE1/CADPS2/SYP/MCTP1	11										R-HSA-68827	CDT1 association with the CDC6:ORC:origin complex	4/240	59/10704	0.0429862	0.168074	0.127676	PSMB7/PSMA1/PSMD8/PSMA6	4
MT-ND3	AT8_up	GO:0032387	negative regulation of intracellular transport	5/374	59/18866	0.00621263	0.10197	0.0890841	MAP1B/OS9/CABP1/UBAC2/CNIH2	5										R-HSA-4839743	phosphorylation site mutants of CTNNB1 are not targeted to the proteasome by the destruction complex	2/240	15/10704	0.0433861	0.168074	0.127676	PPP2R5C/PPP2R1A	2
SON	AT8_up	GO:0098930	axonal transport	5/374	59/18866	0.00621263	0.10197	0.0890841	AP3S1/CNIH2/NEFL/UCHL1/RAB27B	5										R-HSA-5099900	WNT5A-dependent internalization of FZD4	2/240	15/10704	0.0433861	0.168074	0.127676	CLTB/AP2A1	2
PHF24	AT8_up	GO:0043112	receptor metabolic process	10/374	198/18866	0.00629352	0.102841	0.0898446	SNCA/SNAP25/AP2A1/CACNG8/APOE/NECAB2/LRPAP1/SNX1/SCYL2/SH3GLB1	10										R-HSA-5339716	Misspliced GSK3beta mutants stabilize beta-catenin	2/240	15/10704	0.0433861	0.168074	0.127676	PPP2R5C/PPP2R1A	2
PRR34-AS1	AT8_up	GO:0009141	nucleoside triphosphate metabolic process	7/374	110/18866	0.00632491	0.102898	0.089895	TMSB4X/PKM/PID1/CYC1/ANTKMT/IMPDH2/RHOQ	7										R-HSA-5358747	S33 mutants of beta-catenin aren't phosphorylated	2/240	15/10704	0.0433861	0.168074	0.127676	PPP2R5C/PPP2R1A	2
POLDIP2	AT8_up	GO:0098657	import into cell	11/374	230/18866	0.00637182	0.103207	0.0901646	SNCA/SNAP25/ATP1A1/SLC39A12/CACNG8/SLC8A1/SLC1A3/SLC2A1/NEURL1B/ACSL1/SLC9A1	11										R-HSA-5358749	S37 mutants of beta-catenin aren't phosphorylated	2/240	15/10704	0.0433861	0.168074	0.127676	PPP2R5C/PPP2R1A	2
TMSB10	AT8_up	GO:0051348	negative regulation of transferase activity	13/374	296/18866	0.0064061	0.103309	0.0902537	SNCA/YWHAG/SRCIN1/GSTP1/SLC8A1/GPS1/APOE/AIDA/UCHL1/PPP2R1A/CDKN2D/ERRFI1/TRIM27	13										R-HSA-5358751	S45 mutants of beta-catenin aren't phosphorylated	2/240	15/10704	0.0433861	0.168074	0.127676	PPP2R5C/PPP2R1A	2
CADPS2	AT8_up	GO:0072521	purine-containing compound metabolic process	18/374	472/18866	0.0064596	0.103719	0.0906118	ACBD6/HPRT1/ACSL6/COASY/MVK/TMSB4X/BAD/PKM/PRKAG1/ACSL1/PID1/CYC1/ANTKMT/PANK3/IMPDH2/GUCY1A2/NUDT9/RHOQ	18										R-HSA-5358752	T41 mutants of beta-catenin aren't phosphorylated	2/240	15/10704	0.0433861	0.168074	0.127676	PPP2R5C/PPP2R1A	2
NEFL	AT8_up	GO:0003015	heart process	13/374	297/18866	0.00658305	0.104777	0.091536	CALM2/ATP1A1/PRKACA/ATP2B1/CACNG8/SLC8A1/KCNK1/SPTBN4/S100A1/GJA1/KCNIP2/YWHAE/SLC9A1	13										R-HSA-6794362	Protein-protein interactions at synapses	5/240	86/10704	0.0437586	0.168783	0.128215	SYT1/SIPA1L1/PPFIA2/DLG3/DBNL	5
AIDA	AT8_up	GO:0071276	cellular response to cadmium ion	4/374	38/18866	0.00659192	0.104777	0.091536	MAPK3/JUN/MT1G/MT1M	4										R-HSA-187577	SCF(Skp2)-mediated degradation of p27/p21	4/240	60/10704	0.0452779	0.170777	0.129729	PSMB7/PSMA1/PSMD8/PSMA6	4
NELFE	AT8_up	GO:0010038	response to metal ion	15/374	366/18866	0.0066273	0.104777	0.091536	SNCA/ENTPD6/CALM2/SYT1/MAPK3/JUN/MT1G/NEUROD2/MT1M/BACE1/B2M/BAD/KCNIP2/KCNH1/ACO1	15										R-HSA-5607761	Dectin-1 mediated noncanonical NF-kB signaling	4/240	60/10704	0.0452779	0.170777	0.129729	PSMB7/PSMA1/PSMD8/PSMA6	4
CAPN5	AT8_up	GO:0035305	negative regulation of dephosphorylation	7/374	111/18866	0.00663897	0.104777	0.091536	PPP1R26/DLG3/ARPP19/PPME1/PPP1R2/YWHAE/PPP1R11	7										R-HSA-5368286	Mitochondrial translation initiation	5/240	87/10704	0.0456148	0.170777	0.129729	MRPS24/MRPL28/MRPL37/MRPL57/MRPS34	5
UBALD1	AT8_up	GO:0032515	negative regulation of phosphoprotein phosphatase activity	5/374	60/18866	0.00666975	0.104814	0.0915691	PPP1R26/ARPP19/PPME1/PPP1R2/PPP1R11	5										R-HSA-5389840	Mitochondrial translation elongation	5/240	87/10704	0.0456148	0.170777	0.129729	MRPS24/MRPL28/MRPL37/MRPL57/MRPS34	5
DGCR2	AT8_up	GO:0072384	organelle transport along microtubule	6/374	85/18866	0.00685349	0.105556	0.092217	MAP1B/AP3S1/PRKCZ/CNIH2/NEFL/UCHL1	6										R-HSA-5419276	Mitochondrial translation termination	5/240	87/10704	0.0456148	0.170777	0.129729	MRPS24/MRPL28/MRPL37/MRPL57/MRPS34	5
XPO6	AT8_up	GO:0002726	positive regulation of T cell cytokine production	3/374	20/18866	0.00685804	0.105556	0.092217	PRKCZ/B2M/MAP3K7	3										R-HSA-983168	Antigen processing: Ubiquitination & Proteasome degradation	12/240	309/10704	0.0456658	0.170777	0.129729	PSMB7/PSMA1/CUL3/FBXO2/ASB1/STUB1/PSMD8/LRRC41/PSMA6/FBXL15/ANAPC1/KLHL9	12
AKAP8	AT8_up	GO:0016082	synaptic vesicle priming	3/374	20/18866	0.00685804	0.105556	0.092217	SNCA/SNAP25/CADPS2	3										R-HSA-156590	Glutathione conjugation	3/240	36/10704	0.0461921	0.170777	0.129729	GSTP1/MGST1/MGST3	3
SYP	AT8_up	GO:2001169	regulation of ATP biosynthetic process	3/374	20/18866	0.00685804	0.105556	0.092217	TMSB4X/PID1/ANTKMT	3										R-HSA-5673000	RAF activation	3/240	36/10704	0.0461921	0.170777	0.129729	CALM2/PPP2R5C/PPP2R1A	3
NANS	AT8_up	GO:0072655	establishment of protein localization to mitochondrion	8/374	140/18866	0.00685986	0.105556	0.092217	GDAP1/YWHAZ/YWHAG/UBL5/BAD/SH3GLB1/MICALL2/YWHAE	8										R-HSA-6804757	Regulation of TP53 Degradation	3/240	36/10704	0.0461921	0.170777	0.129729	AKT3/PPP2R5C/PPP2R1A	3
DEPP1	AT8_up	GO:0051258	protein polymerization	13/374	300/18866	0.00713732	0.108661	0.0949296	SNCA/MAP1B/CHMP3/SLC39A12/STMN2/SPTBN4/TMSB4X/ARPC3/TMSB10/NEFL/DBNL/MICALL2/TRIM27	13										R-HSA-76046	RNA Polymerase III Transcription Initiation	3/240	36/10704	0.0461921	0.170777	0.129729	POLR1D/POLR2E/SNAPC2	3
ATP6V0D1	AT8_up	GO:0046324	regulation of glucose import	5/374	61/18866	0.00714992	0.108661	0.0949296	ARPP19/RTN2/PID1/SELENOS/RHOQ	5										R-HSA-174143	APC/C-mediated degradation of cell cycle proteins	5/240	88/10704	0.0475173	0.172808	0.131272	PSMB7/PSMA1/PSMD8/PSMA6/ANAPC1	5
LRRC41	AT8_up	GO:1902110	positive regulation of mitochondrial membrane permeability involved in apoptotic process	5/374	61/18866	0.00714992	0.108661	0.0949296	YWHAZ/YWHAG/TMEM14A/BAD/YWHAE	5										R-HSA-2565942	Regulation of PLK1 Activity at G2/M Transition	5/240	88/10704	0.0475173	0.172808	0.131272	YWHAG/PRKACA/TUBB/PPP2R1A/YWHAE	5
YKT6	AT8_up	GO:0007584	response to nutrient	9/374	171/18866	0.00720267	0.109014	0.095238	MAP1B/GDAP1/ATP2B1/GSTP1/SLC8A1/CDKN2D/PKM/BCKDHB/ACSL1	9										R-HSA-450531	Regulation of mRNA stability by proteins that bind AU-rich elements	5/240	88/10704	0.0475173	0.172808	0.131272	PSMB7/YWHAZ/PSMA1/PSMD8/PSMA6	5
MGST3	AT8_up	GO:0001505	regulation of neurotransmitter levels	11/374	235/18866	0.00744162	0.111264	0.0972035	SNCA/SNAP25/SYT1/SNCG/PPFIA2/SLC1A3/GRIK5/BACE1/CADPS2/SYP/MCTP1	11										R-HSA-453276	Regulation of mitotic cell cycle	5/240	88/10704	0.0475173	0.172808	0.131272	PSMB7/PSMA1/PSMD8/PSMA6/ANAPC1	5
PLCB1	AT8_up	GO:0071453	cellular response to oxygen levels	11/374	235/18866	0.00744162	0.111264	0.0972035	PSMB7/PSMA1/SLC8A1/STUB1/PSMD8/FAM162A/BAD/ATP6V0D1/PSMA6/ATP6V1G1/SLC9A1	11										R-HSA-1295596	Spry regulation of FGF signaling	2/240	16/10704	0.0488666	0.176993	0.134451	MAPK3/PPP2R1A	2
PARP2	AT8_up	GO:0031333	negative regulation of protein-containing complex assembly	8/374	142/18866	0.00745075	0.111264	0.0972035	SNCA/LMO4/STMN2/PRKCZ/SPTBN4/TMSB4X/TMSB10/AIDA	8										R-HSA-2408522	Selenoamino acid metabolism	6/240	118/10704	0.0494437	0.177711	0.134997	RPL41/RPL30/RPL18A/RPL39/RPL12/RPS18	6
DLG3	AT8_up	GO:0000910	cytokinesis	9/374	172/18866	0.00747182	0.111264	0.0972035	CALM2/CHMP3/CUL3/PDXP/PRPF40A/RAB11FIP4/SON/SH3GLB1/KLHL9	9										R-HSA-6806003	Regulation of TP53 Expression and Degradation	3/240	37/10704	0.0494639	0.177711	0.134997	AKT3/PPP2R5C/PPP2R1A	3
DHX30	AT8_up	GO:0050890	cognition	13/374	302/18866	0.00752695	0.111635	0.0975273	SNAP25/CCK/VDAC3/JUN/NEUROD2/PRKCZ/CLDN5/APOE/B2M/DGCR2/PLCB1/HLA-DRA/CRTC1	13
SURF1	AT8_up	GO:0051453	regulation of intracellular pH	6/374	87/18866	0.00765819	0.112229	0.0980466	ATP6V0B/ATP6V1F/ATP6V0C/ATP6V0D1/ATP6V1G1/SLC9A1	6
UCHL1	AT8_up	GO:0055072	iron ion homeostasis	6/374	87/18866	0.00765819	0.112229	0.0980466	FTL/B2M/ATP6V0D1/ATP6V1G1/ACO1/EIF2AK1	6
NECAB2	AT8_up	GO:0060291	long-term synaptic potentiation	6/374	87/18866	0.00765819	0.112229	0.0980466	SNAP25/MPP2/EPHA4/PRKCZ/APOE/CRTC1	6
PPP2R1A	AT8_up	GO:1903829	positive regulation of cellular protein localization	14/374	338/18866	0.00783793	0.114409	0.0999511	YWHAZ/YWHAG/UBL5/PRKACA/ERBB4/BAD/NECAB2/SH3GLB1/MICALL2/MIEF1/YWHAE/GNAI1/SAR1B/MSN	14
MT-ND4L	AT8_up	GO:0061162	establishment of monopolar cell polarity	3/374	21/18866	0.00788499	0.114643	0.100155	MAP1B/SLC9A3R1/MSN	3
CDKN2D	AT8_up	GO:0031623	receptor internalization	7/374	115/18866	0.00801216	0.116035	0.101372	SNCA/SNAP25/CACNG8/NECAB2/LRPAP1/SNX1/SCYL2	7
LSS	AT8_up	GO:0070585	protein localization to mitochondrion	8/374	144/18866	0.00807919	0.11618	0.101498	GDAP1/YWHAZ/YWHAG/UBL5/BAD/SH3GLB1/MICALL2/YWHAE	8
TRNP1	AT8_up	GO:0090559	regulation of membrane permeability	6/374	88/18866	0.00808511	0.11618	0.101498	YWHAZ/YWHAG/TMEM14A/BAD/YWHAE/SLC9A1	6
CXXC4	AT8_up	GO:1902686	mitochondrial outer membrane permeabilization involved in programmed cell death	5/374	63/18866	0.00818165	0.116931	0.102154	YWHAZ/YWHAG/TMEM14A/BAD/YWHAE	5
MEAF6	AT8_up	GO:0006888	endoplasmic reticulum to Golgi vesicle-mediated transport	10/374	206/18866	0.00822454	0.116931	0.102154	NRBP2/CUL3/ERGIC3/TRAPPC6A/SPTBN4/CNIH2/YKT6/ARCN1/SAR1B/COG1	10
ARPP19	AT8_up	GO:1990778	protein localization to cell periphery	14/374	340/18866	0.00823235	0.116931	0.102154	SNAP25/TSPAN5/IQSEC2/CACNG8/PRKCZ/SPTBN4/SLC9A3R1/RAB10/BBS2/RAB3C/PID1/GNAI1/RILPL1/RHOQ	14
PPME1	AT8_up	GO:0010921	regulation of phosphatase activity	9/374	175/18866	0.00832554	0.117365	0.102533	CALM2/PPP1R26/PPP2R5C/DLG3/PPP2R1A/ARPP19/PPME1/PPP1R2/PPP1R11	9
WDR12	AT8_up	GO:0070372	regulation of ERK1 and ERK2 cascade	13/374	306/18866	0.00835659	0.117365	0.102533	MAPK3/YWHAZ/JUN/GSTP1/RPS6KA6/PRKCZ/APOE/ERBB4/CHI3L1/SLC9A3R1/NELFE/NECAB2/ERRFI1	13
ERRFI1	AT8_up	GO:0046916	cellular transition metal ion homeostasis	7/374	116/18866	0.00838592	0.117365	0.102533	SLC39A12/MT1G/FTL/MT1M/ATP6V0D1/ATP6V1G1/ACO1	7
RPS18	AT8_up	GO:0006402	mRNA catabolic process	15/374	376/18866	0.00839001	0.117365	0.102533	PSMB7/YWHAZ/PSMA1/FTO/PSMD8/RPL41/RPL30/RPL18A/RPL39/FASTKD1/RPL12/PPP2R1A/RPS18/PSMA6/HNRNPA0	15
C9orf40	AT8_up	GO:0043506	regulation of JUN kinase activity	6/374	89/18866	0.00852886	0.118857	0.103837	EPHA4/SPAG9/GSTP1/AIDA/DBNL/MAP3K7	6
PSMA6	AT8_up	GO:0046686	response to cadmium ion	5/374	64/18866	0.00873433	0.121263	0.105939	MAPK3/JUN/MT1G/MT1M/B2M	5
BBS2	AT8_up	GO:0030859	polarized epithelial cell differentiation	3/374	22/18866	0.00899771	0.122164	0.106726	SLC9A3R1/RAB10/MSN	3
PPP1R2	AT8_up	GO:0061339	establishment or maintenance of monopolar cell polarity	3/374	22/18866	0.00899771	0.122164	0.106726	MAP1B/SLC9A3R1/MSN	3
MLXIP	AT8_up	GO:0099633	protein localization to postsynaptic specialization membrane	3/374	22/18866	0.00899771	0.122164	0.106726	IQSEC2/CACNG8/PRKCZ	3
MGMT	AT8_up	GO:0099645	neurotransmitter receptor localization to postsynaptic specialization membrane	3/374	22/18866	0.00899771	0.122164	0.106726	IQSEC2/CACNG8/PRKCZ	3
DDX10	AT8_up	GO:1901685	glutathione derivative metabolic process	3/374	22/18866	0.00899771	0.122164	0.106726	GSTP1/MGST1/MGST3	3
MRPL37	AT8_up	GO:1901687	glutathione derivative biosynthetic process	3/374	22/18866	0.00899771	0.122164	0.106726	GSTP1/MGST1/MGST3	3
FBXL15	AT8_up	GO:0051592	response to calcium ion	8/374	147/18866	0.00909539	0.122837	0.107314	ENTPD6/CALM2/SYT1/JUN/NEUROD2/BAD/KCNIP2/KCNH1	8
INO80E	AT8_up	GO:0034765	regulation of ion transmembrane transport	18/374	489/18866	0.00913231	0.122837	0.107314	SNCA/CALM2/TSPAN13/PRKACA/CACNG8/SLC8A1/CNIH2/TMSB4X/S100A1/SLC9A3R1/GRIA2/NEFL/DLG3/KCNIP2/KCNH1/YWHAE/SLC9A1/ANTKMT	18
DBNL	AT8_up	GO:0010257	NADH dehydrogenase complex assembly	5/374	65/18866	0.00931229	0.122837	0.107314	NDUFAF8/NDUFS8/NDUFA7/NDUFB4/NDUFB5	5
RAP1GAP2	AT8_up	GO:0032981	mitochondrial respiratory chain complex I assembly	5/374	65/18866	0.00931229	0.122837	0.107314	NDUFAF8/NDUFS8/NDUFA7/NDUFB4/NDUFB5	5
NTNG2	AT8_up	GO:0048278	vesicle docking	5/374	65/18866	0.00931229	0.122837	0.107314	SNAP25/SYT1/RAB10/YKT6/RAB3C	5
TMEM230	AT8_up	GO:0051205	protein insertion into membrane	5/374	65/18866	0.00931229	0.122837	0.107314	YWHAZ/YWHAG/REEP1/BAD/YWHAE	5
ARCN1	AT8_up	GO:0090181	regulation of cholesterol metabolic process	5/374	65/18866	0.00931229	0.122837	0.107314	SC5D/MVK/APOE/LSS/SEC14L2	5
ZNF133	AT8_up	GO:0030100	regulation of endocytosis	10/374	210/18866	0.00934664	0.122837	0.107314	SNCA/SNAP91/AP2A1/SNX17/APOE/B2M/NECAB2/LRPAP1/SCYL2/MCTP1	10
MRPL57	AT8_up	GO:0034764	positive regulation of transmembrane transport	10/374	210/18866	0.00934664	0.122837	0.107314	SNCA/CALM2/TMSB4X/S100A1/SLC9A3R1/ARPP19/KCNIP2/SLC9A1/ANTKMT/RHOQ	10
FOPNL	AT8_up	GO:0072595	maintenance of protein localization in organelle	4/374	42/18866	0.00939696	0.12306	0.107509	OS9/GRIK5/GJA1/GPAA1	4
NRN1	AT8_up	GO:0070555	response to interleukin-1	10/374	211/18866	0.00964463	0.125857	0.109953	SNCA/MAPK3/PSMB7/PSMA1/TOLLIP/PSMD8/CHI3L1/PLCB1/PSMA6/MAP3K7	10
PKM	AT8_up	GO:0032535	regulation of cellular component size	15/374	383/18866	0.00983217	0.127719	0.111579	MAP1B/SEMA6B/PDXP/SPTBN4/TMSB4X/ARPC3/APOE/SLC9A3R1/DCC/TMSB10/NEFL/DBNL/RAP1GAP2/TRIM27/MSN	15
GDAP1L1	AT8_up	GO:1902108	regulation of mitochondrial membrane permeability involved in apoptotic process	5/374	66/18866	0.00991606	0.127719	0.111579	YWHAZ/YWHAG/TMEM14A/BAD/YWHAE	5
ATP6V1G1	AT8_up	GO:0000184	nuclear-transcribed mRNA catabolic process, nonsense-mediated decay	7/374	120/18866	0.0100101	0.127719	0.111579	RPL41/RPL30/RPL18A/RPL39/RPL12/PPP2R1A/RPS18	7
LRPAP1	AT8_up	GO:0045047	protein targeting to ER	7/374	120/18866	0.0100101	0.127719	0.111579	PMM1/RPL41/RPL30/RPL18A/RPL39/RPL12/RPS18	7
ANAPC1	AT8_up	GO:0000715	nucleotide-excision repair, DNA damage recognition	3/374	23/18866	0.0101976	0.127719	0.111579	COPS5/COPS3/GPS1	3
C7orf50	AT8_up	GO:0010155	regulation of proton transport	3/374	23/18866	0.0101976	0.127719	0.111579	TMSB4X/SLC9A3R1/ANTKMT	3
RAB3C	AT8_up	GO:0031629	synaptic vesicle fusion to presynaptic active zone membrane	3/374	23/18866	0.0101976	0.127719	0.111579	SNAP25/SYT1/GRIK5	3
OLFM3	AT8_up	GO:0034643	establishment of mitochondrion localization, microtubule-mediated	3/374	23/18866	0.0101976	0.127719	0.111579	MAP1B/NEFL/UCHL1	3
PRKAG1	AT8_up	GO:0047497	mitochondrion transport along microtubule	3/374	23/18866	0.0101976	0.127719	0.111579	MAP1B/NEFL/UCHL1	3
CD99L2	AT8_up	GO:0070584	mitochondrion morphogenesis	3/374	23/18866	0.0101976	0.127719	0.111579	IMMT/POLDIP2/PID1	3
NAXE	AT8_up	GO:2000810	regulation of bicellular tight junction assembly	3/374	23/18866	0.0101976	0.127719	0.111579	PRKACA/CLDN5/GJA1	3
HNRNPA0	AT8_up	GO:0046688	response to copper ion	4/374	43/18866	0.0102023	0.127719	0.111579	SNCA/MT1G/MT1M/BACE1	4
UCHL3	AT8_up	GO:0046942	carboxylic acid transport	14/374	350/18866	0.0104464	0.129867	0.113456	SNAP25/SYT1/PPFIA2/CCK/SLC25A11/SLC1A3/SLC2A1/APOE/SLC9A3R1/GJA1/SLC25A38/ACSL1/SFXN5/ABCD3	14
SEC14L2	AT8_up	GO:0031146	SCF-dependent proteasomal ubiquitin-dependent protein catabolic process	6/374	93/18866	0.0104794	0.129867	0.113456	PSMB7/PSMA1/FBXO2/PSMD8/PSMA6/FBXL15	6
CFAP298	AT8_up	GO:0045185	maintenance of protein location	6/374	93/18866	0.0104794	0.129867	0.113456	OS9/GRIK5/TMSB4X/GJA1/TMSB10/GPAA1	6
KCNIP2	AT8_up	GO:0016358	dendrite development	11/374	247/18866	0.0105814	0.130425	0.113943	MAP1B/SIPA1L1/PPFIA2/HPRT1/EPHA4/SRCIN1/APOE/DCC/LZTS3/DBNL/CRTC1	11
MLC1	AT8_up	GO:0051224	negative regulation of protein transport	8/374	151/18866	0.010595	0.130425	0.113943	OS9/VSNL1/SRCIN1/CABP1/UBAC2/APOE/HDAC9/PPP1R11	8
PGRMC2	AT8_up	GO:0071347	cellular response to interleukin-1	9/374	183/18866	0.0109652	0.133807	0.116898	MAPK3/PSMB7/PSMA1/TOLLIP/PSMD8/CHI3L1/PLCB1/PSMA6/MAP3K7	9
RAB27B	AT8_up	GO:1903169	regulation of calcium ion transmembrane transport	8/374	152/18866	0.010997	0.133807	0.116898	SNCA/CALM2/TSPAN13/PRKACA/SLC8A1/S100A1/YWHAE/SLC9A1	8
SNX1	AT8_up	GO:0006904	vesicle docking involved in exocytosis	4/374	44/18866	0.011051	0.133807	0.116898	SNAP25/RAB10/YKT6/RAB3C	4
IFIT2	AT8_up	GO:0048489	synaptic vesicle transport	4/374	44/18866	0.011051	0.133807	0.116898	AP3S1/SNAP91/CNIH2/TMEM230	4
BCKDHB	AT8_up	GO:1903539	protein localization to postsynaptic membrane	4/374	44/18866	0.011051	0.133807	0.116898	SNAP25/IQSEC2/CACNG8/PRKCZ	4
WDR77	AT8_up	GO:0015849	organic acid transport	14/374	353/18866	0.0111944	0.135101	0.118028	SNAP25/SYT1/PPFIA2/CCK/SLC25A11/SLC1A3/SLC2A1/APOE/SLC9A3R1/GJA1/SLC25A38/ACSL1/SFXN5/ABCD3	14
E4F1	AT8_up	GO:0090090	negative regulation of canonical Wnt signaling pathway	9/374	184/18866	0.0113347	0.136349	0.119118	PSMB7/PSMA1/CUL3/UBAC2/PSMD8/APOE/SLC9A3R1/PSMA6/SCYL2	9
SLC25A38	AT8_up	GO:0051222	positive regulation of protein transport	14/374	354/18866	0.0114528	0.13683	0.119539	YWHAZ/VSNL1/YWHAG/UBL5/NNAT/PRKACA/PRKCZ/GJA1/BAD/SH3GLB1/MICALL2/MIEF1/YWHAE/SAR1B	14
SCYL2	AT8_up	GO:0010881	regulation of cardiac muscle contraction by regulation of the release of sequestered calcium ion	3/374	24/18866	0.0114859	0.13683	0.119539	CALM2/PRKACA/SLC8A1	3
KCNH1	AT8_up	GO:0099500	vesicle fusion to plasma membrane	3/374	24/18866	0.0114859	0.13683	0.119539	SNAP25/SYT1/GRIK5	3
SH3GLB1	AT8_up	GO:0048814	regulation of dendrite morphogenesis	6/374	95/18866	0.0115647	0.137327	0.119973	SIPA1L1/PPFIA2/EPHA4/SRCIN1/LZTS3/DBNL	6
PEPD	AT8_up	GO:0001736	establishment of planar polarity	7/374	124/18866	0.0118525	0.139844	0.122172	ASTN2/PSMB7/PSMA1/AP2A1/PSMD8/DLG3/PSMA6	7
MICALL2	AT8_up	GO:0007164	establishment of tissue polarity	7/374	124/18866	0.0118525	0.139844	0.122172	ASTN2/PSMB7/PSMA1/AP2A1/PSMD8/DLG3/PSMA6	7
MCTP1	AT8_up	GO:0051204	protein insertion into mitochondrial membrane	4/374	45/18866	0.0119439	0.140028	0.122332	YWHAZ/YWHAG/BAD/YWHAE	4
TOR1AIP1	AT8_up	GO:0072583	clathrin-dependent endocytosis	4/374	45/18866	0.0119439	0.140028	0.122332	CLTB/SNAP91/AP2A1/SCYL2	4
UPK3BL1	AT8_up	GO:1901214	regulation of neuron death	13/374	321/18866	0.0121268	0.141384	0.123517	SNCA/NRBP2/SNCG/JUN/TRIM2/GRIK5/BACE1/APOE/DCC/BAD/NEFL/PARP2/RILPL1	13
ACO1	AT8_up	GO:0035249	synaptic transmission, glutamatergic	6/374	96/18866	0.0121361	0.141384	0.123517	SYT1/CACNG8/GRIK5/CNIH2/CLSTN3/GRIA2	6
INO80B	AT8_up	GO:1904950	negative regulation of establishment of protein localization	8/374	155/18866	0.0122705	0.14236	0.12437	OS9/VSNL1/SRCIN1/CABP1/UBAC2/APOE/HDAC9/PPP1R11	8
ACSL1	AT8_up	GO:0030178	negative regulation of Wnt signaling pathway	10/374	219/18866	0.012297	0.14236	0.12437	PSMB7/PSMA1/CUL3/UBAC2/PSMD8/APOE/SLC9A3R1/CXXC4/PSMA6/SCYL2	10
AL451165.2	AT8_up	GO:0030968	endoplasmic reticulum unfolded protein response	7/374	125/18866	0.0123489	0.142514	0.124505	COPS5/MYDGF/KLHDC3/RHBDD2/STUB1/ATP6V0D1/SELENOS	7
MIEF1	AT8_up	GO:0031668	cellular response to extracellular stimulus	11/374	253/18866	0.0124903	0.143354	0.125239	MAPK3/GDAP1/JUN/SESN3/ATP2B1/GSTP1/SLC2A1/CADPS2/PRKAG1/SH3GLB1/GAS2L1	11
DGLUCY	AT8_up	GO:0043409	negative regulation of MAPK cascade	9/374	187/18866	0.0124993	0.143354	0.125239	GSTP1/RPS6KA6/GPS1/APOE/SLC9A3R1/AIDA/UCHL1/PPP2R1A/ERRFI1	9
TOX4	AT8_up	GO:0008088	axo-dendritic transport	5/374	70/18866	0.0125996	0.144057	0.125852	AP3S1/CNIH2/NEFL/UCHL1/RAB27B	5
RGS10	AT8_up	GO:0031669	cellular response to nutrient levels	10/374	221/18866	0.0130386	0.148616	0.129835	MAPK3/GDAP1/JUN/SESN3/ATP2B1/SLC2A1/CADPS2/PRKAG1/SH3GLB1/GAS2L1	10
GPAA1	AT8_up	GO:0070371	ERK1 and ERK2 cascade	13/374	325/18866	0.0133259	0.151095	0.132001	MAPK3/YWHAZ/JUN/GSTP1/RPS6KA6/PRKCZ/APOE/ERBB4/CHI3L1/SLC9A3R1/NELFE/NECAB2/ERRFI1	13
SFXN5	AT8_up	GO:0050810	regulation of steroid biosynthetic process	6/374	98/18866	0.013338	0.151095	0.132001	SC5D/ATP1A1/MVK/APOE/LSS/SEC14L2	6
FRRS1L	AT8_up	GO:0099111	microtubule-based transport	9/374	190/18866	0.0137509	0.155296	0.135672	MAP1B/AP3S1/PRKCZ/CNIH2/SLC9A3R1/NEFL/UCHL1/RAB27B/IFT43	9
SZRD1	AT8_up	GO:0042551	neuron maturation	4/374	47/18866	0.0138653	0.155637	0.135969	SPTBN4/KCNIP2/ANKS1A/MTCH1	4
C7orf25	AT8_up	GO:0070849	response to epidermal growth factor	4/374	47/18866	0.0138653	0.155637	0.135969	MAPK3/GSTP1/ERBB4/ERRFI1	4
AP5S1	AT8_up	GO:0002474	antigen processing and presentation of peptide antigen via MHC class I	6/374	99/18866	0.013969	0.156326	0.136571	PSMB7/PSMA1/PSMD8/B2M/PSMA6/SAR1B	6
EIF2AK1	AT8_up	GO:0043624	cellular protein complex disassembly	10/374	224/18866	0.0142134	0.157053	0.137206	MAP1B/MICAL2/MRPS24/PDXP/STMN2/MRPL28/SPTBN4/MRPL37/MRPL57/MRPS34	10
RTN2	AT8_up	GO:0021952	central nervous system projection neuron axonogenesis	3/374	26/18866	0.0143316	0.157053	0.137206	EPHA4/SPTBN4/DCC	3
YWHAE	AT8_up	GO:0030810	positive regulation of nucleotide biosynthetic process	3/374	26/18866	0.0143316	0.157053	0.137206	TMSB4X/PID1/ANTKMT	3
KIAA2013	AT8_up	GO:0051654	establishment of mitochondrion localization	3/374	26/18866	0.0143316	0.157053	0.137206	MAP1B/NEFL/UCHL1	3
SLC9A1	AT8_up	GO:0060074	synapse maturation	3/374	26/18866	0.0143316	0.157053	0.137206	YWHAZ/NEUROD2/NEFL	3
PID1	AT8_up	GO:1900373	positive regulation of purine nucleotide biosynthetic process	3/374	26/18866	0.0143316	0.157053	0.137206	TMSB4X/PID1/ANTKMT	3
GNAI1	AT8_up	GO:1903649	regulation of cytoplasmic transport	3/374	26/18866	0.0143316	0.157053	0.137206	CHMP3/MAPK3/MSN	3
C3orf14	AT8_up	GO:0006413	translational initiation	9/374	192/18866	0.0146353	0.159602	0.139433	COPS5/EIF3G/RPL41/RPL30/RPL18A/RPL39/RPL12/RPS18/EIF2AK1	9
HDHD3	AT8_up	GO:0021537	telencephalon development	11/374	259/18866	0.0146507	0.159602	0.139433	HPRT1/UQCRQ/SLC8A1/NEUROD6/SLC2A1/ERBB4/BAD/NEFL/PLCB1/BBS2/YWHAE	11
SELENOS	AT8_up	GO:0034976	response to endoplasmic reticulum stress	12/374	294/18866	0.014754	0.160044	0.139819	COPS5/JUN/OS9/MYDGF/FBXO2/KLHDC3/RHBDD2/UBAC2/STUB1/ATP6V0D1/SELENOS/UBXN1	12
ATG2B	AT8_up	GO:0008089	anterograde axonal transport	4/374	48/18866	0.0148953	0.160044	0.139819	AP3S1/CNIH2/NEFL/RAB27B	4
OSGEP	AT8_up	GO:0031952	regulation of protein autophosphorylation	4/374	48/18866	0.0148953	0.160044	0.139819	CALM2/JUN/PPP2R5C/ERRFI1	4
NDUFB5	AT8_up	GO:0062237	protein localization to postsynapse	4/374	48/18866	0.0148953	0.160044	0.139819	SNAP25/IQSEC2/CACNG8/PRKCZ	4
HLA-DRA	AT8_up	GO:1903779	regulation of cardiac conduction	5/374	73/18866	0.014908	0.160044	0.139819	CALM2/ATP1A1/PRKACA/ATP2B1/SLC8A1	5
ITFG1	AT8_up	GO:0007611	learning or memory	11/374	260/18866	0.0150366	0.160957	0.140617	SNAP25/CCK/VDAC3/JUN/NEUROD2/PRKCZ/CLDN5/APOE/B2M/PLCB1/CRTC1	11
CYC1	AT8_up	GO:0010970	transport along microtubule	8/374	161/18866	0.0151377	0.161106	0.140747	MAP1B/AP3S1/PRKCZ/CNIH2/NEFL/UCHL1/RAB27B/IFT43	8
PPP1R11	AT8_up	GO:0034767	positive regulation of ion transmembrane transport	8/374	161/18866	0.0151377	0.161106	0.140747	SNCA/CALM2/TMSB4X/S100A1/SLC9A3R1/KCNIP2/SLC9A1/ANTKMT	8
SMDT1	AT8_up	GO:0019218	regulation of steroid metabolic process	7/374	131/18866	0.015647	0.161751	0.14131	SC5D/ATP1A1/STUB1/MVK/APOE/LSS/SEC14L2	7
MEG3	AT8_up	GO:0051881	regulation of mitochondrial membrane potential	5/374	74/18866	0.0157363	0.161751	0.14131	CCK/MTLN/BAD/PID1/PPP2R3C	5
ANTKMT	AT8_up	GO:2001259	positive regulation of cation channel activity	5/374	74/18866	0.0157363	0.161751	0.14131	CALM2/TMSB4X/S100A1/KCNIP2/ANTKMT	5
GJB6	AT8_up	GO:0006307	DNA dealkylation involved in DNA repair	2/374	10/18866	0.015876	0.161751	0.14131	FTO/MGMT	2
RBFOX1	AT8_up	GO:0015937	coenzyme A biosynthetic process	2/374	10/18866	0.015876	0.161751	0.14131	COASY/PANK3	2
TRIM27	AT8_up	GO:0031943	regulation of glucocorticoid metabolic process	2/374	10/18866	0.015876	0.161751	0.14131	ATP1A1/STUB1	2
POLR2E	AT8_up	GO:0034447	very-low-density lipoprotein particle clearance	2/374	10/18866	0.015876	0.161751	0.14131	APOE/LRPAP1	2
SNAPC2	AT8_up	GO:0042989	sequestering of actin monomers	2/374	10/18866	0.015876	0.161751	0.14131	TMSB4X/TMSB10	2
ANKS1A	AT8_up	GO:0051351	positive regulation of ligase activity	2/374	10/18866	0.015876	0.161751	0.14131	TMSB4X/ANTKMT	2
ZMYM3	AT8_up	GO:0070341	fat cell proliferation	2/374	10/18866	0.015876	0.161751	0.14131	FTO/PID1	2
YIPF2	AT8_up	GO:0070344	regulation of fat cell proliferation	2/374	10/18866	0.015876	0.161751	0.14131	FTO/PID1	2
ANKRD37	AT8_up	GO:0070862	negative regulation of protein exit from endoplasmic reticulum	2/374	10/18866	0.015876	0.161751	0.14131	OS9/UBAC2	2
KLHL9	AT8_up	GO:0002026	regulation of the force of heart contraction	3/374	27/18866	0.0158907	0.161751	0.14131	ATP1A1/SLC8A1/SLC9A1	3
SAR1B	AT8_up	GO:0007628	adult walking behavior	3/374	27/18866	0.0158907	0.161751	0.14131	EPHA4/SPTBN4/UCHL1	3
WRNIP1	AT8_up	GO:0032527	protein exit from endoplasmic reticulum	4/374	49/18866	0.0159723	0.161751	0.14131	OS9/UBAC2/SELENOS/SAR1B	4
DHX40	AT8_up	GO:0042149	cellular response to glucose starvation	4/374	49/18866	0.0159723	0.161751	0.14131	SESN3/SLC2A1/PRKAG1/SH3GLB1	4
TRIM33	AT8_up	GO:0090151	establishment of protein localization to mitochondrial membrane	4/374	49/18866	0.0159723	0.161751	0.14131	YWHAZ/YWHAG/BAD/YWHAE	4
PANK3	AT8_up	GO:0033108	mitochondrial respiratory chain complex assembly	6/374	102/18866	0.0159867	0.161751	0.14131	NDUFAF8/NDUFS8/NDUFA7/NDUFB4/SURF1/NDUFB5	6
UBXN1	AT8_up	GO:0009267	cellular response to starvation	8/374	163/18866	0.0161934	0.163122	0.142508	MAPK3/JUN/SESN3/SLC2A1/CADPS2/PRKAG1/SH3GLB1/GAS2L1	8
SMIM10L2A	AT8_up	GO:0006605	protein targeting	16/374	444/18866	0.0162136	0.163122	0.142508	GDAP1/YWHAZ/OS9/YWHAG/UBL5/PMM1/RPL41/RPL30/RPL18A/RPL39/RPL12/RPS18/SH3GLB1/MICALL2/MIEF1/YWHAE	16
TXNL4B	AT8_up	GO:1904951	positive regulation of establishment of protein localization	14/374	370/18866	0.0162547	0.163122	0.142508	YWHAZ/VSNL1/YWHAG/UBL5/NNAT/PRKACA/PRKCZ/GJA1/BAD/SH3GLB1/MICALL2/MIEF1/YWHAE/SAR1B	14
NRIP3	AT8_up	GO:0002479	antigen processing and presentation of exogenous peptide antigen via MHC class I, TAP-dependent	5/374	75/18866	0.0165947	0.165186	0.144312	PSMB7/PSMA1/PSMD8/B2M/PSMA6	5
MRPS34	AT8_up	GO:0008344	adult locomotory behavior	5/374	75/18866	0.0165947	0.165186	0.144312	SNCG/EPHA4/SPTBN4/UCHL1/ARCN1	5
FYTTD1	AT8_up	GO:0086001	cardiac muscle cell action potential	5/374	75/18866	0.0165947	0.165186	0.144312	ATP1A1/SLC8A1/GJA1/KCNIP2/YWHAE	5
LRIG1	AT8_up	GO:0002181	cytoplasmic translation	6/374	103/18866	0.0167018	0.165747	0.144801	EIF3G/RPL41/RPL30/RPL18A/RPL39/PKM	6
CRTC1	AT8_up	GO:0001764	neuron migration	8/374	164/18866	0.0167407	0.165747	0.144801	MAP1B/ASTN2/CCK/TUBB2A/ERBB4/DCC/NTNG2/YWHAE	8
ACYP1	AT8_up	GO:0021695	cerebellar cortex development	4/374	50/18866	0.017097	0.168822	0.147488	UQCRQ/NEUROD2/TRNP1/ARCN1	4
ANKRD54	AT8_up	GO:0032271	regulation of protein polymerization	10/374	231/18866	0.017261	0.169986	0.148505	SNCA/MAP1B/SLC39A12/STMN2/SPTBN4/TMSB4X/ARPC3/TMSB10/DBNL/TRIM27	10
DESI1	AT8_up	GO:0010923	negative regulation of phosphatase activity	6/374	104/18866	0.0174386	0.170924	0.149324	PPP1R26/DLG3/ARPP19/PPME1/PPP1R2/PPP1R11	6
RILPL1	AT8_up	GO:0032958	inositol phosphate biosynthetic process	3/374	28/18866	0.0175413	0.170924	0.149324	SNCA/ADCYAP1R1/PPIP5K1	3
MAP3K7	AT8_up	GO:0086013	membrane repolarization during cardiac muscle cell action potential	3/374	28/18866	0.0175413	0.170924	0.149324	ATP1A1/KCNIP2/YWHAE	3
IMPDH2	AT8_up	GO:0095500	acetylcholine receptor signaling pathway	3/374	28/18866	0.0175413	0.170924	0.149324	LY6H/PLCB1/RGS10	3
ABCD3	AT8_up	GO:0048193	Golgi vesicle transport	14/374	374/18866	0.0176668	0.171693	0.149996	NRBP2/CUL3/AP2A1/ERGIC3/TRAPPC6A/SPTBN4/CNIH2/RAB10/YKT6/BBS2/ARCN1/SNX1/SAR1B/COG1	14
ZC3H13	AT8_up	GO:0019882	antigen processing and presentation	10/374	232/18866	0.0177329	0.171884	0.150163	PSMB7/PSMA1/AP2A1/PSMD8/B2M/RAB10/PSMA6/RAB3C/HLA-DRA/SAR1B	10
ATRAID	AT8_up	GO:0035967	cellular response to topologically incorrect protein	8/374	166/18866	0.0178752	0.172809	0.150971	COPS5/CUL3/MYDGF/KLHDC3/RHBDD2/STUB1/ATP6V0D1/SELENOS	8
COG1	AT8_up	GO:0006614	SRP-dependent cotranslational protein targeting to membrane	6/374	105/18866	0.0181975	0.174344	0.152312	RPL41/RPL30/RPL18A/RPL39/RPL12/RPS18	6
COX7A2	AT8_up	GO:0048259	regulation of receptor-mediated endocytosis	6/374	105/18866	0.0181975	0.174344	0.152312	SNAP91/AP2A1/B2M/NECAB2/LRPAP1/SCYL2	6
ALG9	AT8_up	GO:0009743	response to carbohydrate	10/374	233/18866	0.0182143	0.174344	0.152312	MAP1B/VSNL1/PRKACA/GSTP1/SLC8A1/GRIK5/GJA1/BAD/SELENOS/GJB6	10
IFT43	AT8_up	GO:0031113	regulation of microtubule polymerization	4/374	51/18866	0.01827	0.174344	0.152312	SNCA/MAP1B/SLC39A12/STMN2	4
GUCY1A2	AT8_up	GO:1903573	negative regulation of response to endoplasmic reticulum stress	4/374	51/18866	0.01827	0.174344	0.152312	OS9/UBAC2/SELENOS/UBXN1	4
TMEM229B	AT8_up	GO:0010389	regulation of G2/M transition of mitotic cell cycle	9/374	200/18866	0.0185965	0.176924	0.154566	PSMB7/PSMA1/YWHAG/PRKACA/TUBB/PSMD8/PPP2R1A/PSMA6/YWHAE	9
FCGR2A	AT8_up	GO:0019233	sensory perception of pain	6/374	106/18866	0.0189786	0.176924	0.154566	MAPK3/CCK/BACE1/PHF24/UCHL1/SLC9A1	6
MSN	AT8_up	GO:0032414	positive regulation of ion transmembrane transporter activity	6/374	106/18866	0.0189786	0.176924	0.154566	CALM2/TMSB4X/S100A1/KCNIP2/SLC9A1/ANTKMT	6
NUDT9	AT8_up	GO:0006707	cholesterol catabolic process	2/374	11/18866	0.0191523	0.176924	0.154566	SNX17/APOE	2
CLK1	AT8_up	GO:0006857	oligopeptide transport	2/374	11/18866	0.0191523	0.176924	0.154566	SLC9A3R1/GJA1	2
MINDY3	AT8_up	GO:0010918	positive regulation of mitochondrial membrane potential	2/374	11/18866	0.0191523	0.176924	0.154566	MTLN/BAD	2
STIP1	AT8_up	GO:0016127	sterol catabolic process	2/374	11/18866	0.0191523	0.176924	0.154566	SNX17/APOE	2
HIVEP2	AT8_up	GO:0031630	regulation of synaptic vesicle fusion to presynaptic active zone membrane	2/374	11/18866	0.0191523	0.176924	0.154566	SYT1/GRIK5	2
TSC22D2	AT8_up	GO:0031915	positive regulation of synaptic plasticity	2/374	11/18866	0.0191523	0.176924	0.154566	MAP1B/NEUROD2	2
PPIP5K1	AT8_up	GO:0048102	autophagic cell death	2/374	11/18866	0.0191523	0.176924	0.154566	CDKN2D/SH3GLB1	2
MTCH1	AT8_up	GO:0007263	nitric oxide mediated signal transduction	3/374	29/18866	0.0192839	0.176924	0.154566	MT1M/APOE/GUCY1A2	3
RHOQ	AT8_up	GO:0030970	retrograde protein transport, ER to cytosol	3/374	29/18866	0.0192839	0.176924	0.154566	OS9/UBAC2/SELENOS	3
THAP3	AT8_up	GO:0070861	regulation of protein exit from endoplasmic reticulum	3/374	29/18866	0.0192839	0.176924	0.154566	OS9/UBAC2/SAR1B	3
PPP2R3C	AT8_up	GO:0090659	walking behavior	3/374	29/18866	0.0192839	0.176924	0.154566	EPHA4/SPTBN4/UCHL1	3
GAS2L1	AT8_up	GO:1903513	endoplasmic reticulum to cytosol transport	3/374	29/18866	0.0192839	0.176924	0.154566	OS9/UBAC2/SELENOS	3
RPF1	AT8_up	GO:0030433	ubiquitin-dependent ERAD pathway	5/374	78/18866	0.0193548	0.176924	0.154566	OS9/FBXO2/RHBDD2/STUB1/SELENOS	5
		GO:0042310	vasoconstriction	5/374	78/18866	0.0193548	0.176924	0.154566	DOCK5/ATP2B1/SLC8A1/GJA1/BBS2	5
		GO:0031103	axon regeneration	4/374	52/18866	0.0194918	0.177736	0.155276	MAP1B/JUN/EPHA4/NEFL	4
		GO:0098754	detoxification	7/374	138/18866	0.0202336	0.18362	0.160416	GSTP1/MT1G/MT1M/APOE/MGST1/MGST3/SELENOS	7
		GO:0046777	protein autophosphorylation	10/374	237/18866	0.0202365	0.18362	0.160416	CALM2/MAPK3/JUN/EPHA4/PRKACA/ERBB4/PPP2R5C/ERRFI1/EIF2AK1/CLK1	10
		GO:0032272	negative regulation of protein polymerization	5/374	79/18866	0.0203378	0.184087	0.160824	SNCA/STMN2/SPTBN4/TMSB4X/TMSB10	5
		GO:0099172	presynapse organization	4/374	53/18866	0.0207629	0.187475	0.163784	SNCA/PPFIA2/CLSTN3/NTNG2	4
		GO:0051302	regulation of cell division	8/374	171/18866	0.020951	0.188712	0.164865	CALM2/CUL3/PDXP/PRPF40A/RAB11FIP4/NAP1L2/SH3GLB1/KLHL9	8
		GO:1905144	response to acetylcholine	3/374	30/18866	0.0211187	0.1893	0.165378	LY6H/PLCB1/RGS10	3
		GO:1905145	cellular response to acetylcholine	3/374	30/18866	0.0211187	0.1893	0.165378	LY6H/PLCB1/RGS10	3
		GO:0042590	antigen processing and presentation of exogenous peptide antigen via MHC class I	5/374	80/18866	0.0213529	0.190236	0.166196	PSMB7/PSMA1/PSMD8/B2M/PSMA6	5
		GO:2000300	regulation of synaptic vesicle exocytosis	5/374	80/18866	0.0213529	0.190236	0.166196	SYT1/PPFIA2/GRIK5/BACE1/SYP	5
		GO:0010769	regulation of cell morphogenesis involved in differentiation	12/374	310/18866	0.0213778	0.190236	0.166196	MAP1B/SIPA1L1/SEMA6B/PPFIA2/EPHA4/DOCK5/SRCIN1/APOE/DCC/LZTS3/NEFL/DBNL	12
		GO:0006613	cotranslational protein targeting to membrane	6/374	109/18866	0.0214587	0.190497	0.166424	RPL41/RPL30/RPL18A/RPL39/RPL12/RPS18	6
		GO:0048284	organelle fusion	7/374	140/18866	0.0216998	0.192176	0.16789	SNCA/SNAP25/SYT1/CHMP3/GDAP1/GRIK5/PID1	7
		GO:0032886	regulation of microtubule-based process	10/374	240/18866	0.0218574	0.193109	0.168705	SNCA/MAP1B/CHMP3/SLC39A12/STMN2/CNIH2/BBS2/CFAP298/GNAI1/GAS2L1	10
		GO:0042594	response to starvation	9/374	206/18866	0.022041	0.193926	0.169419	MAPK3/JUN/SESN3/SLC2A1/CADPS2/PRKAG1/SH3GLB1/EIF2AK1/GAS2L1	9
		GO:0021543	pallium development	8/374	173/18866	0.0222805	0.193926	0.169419	UQCRQ/NEUROD6/SLC2A1/BAD/NEFL/PLCB1/BBS2/YWHAE	8
		GO:0050954	sensory perception of mechanical stimulus	8/374	173/18866	0.0222805	0.193926	0.169419	SLC1A3/SPTBN4/BACE1/SLC9A3R1/PHF24/CDKN2D/GJB6/LRIG1	8
		GO:1904659	glucose transmembrane transport	6/374	110/18866	0.0223318	0.193926	0.169419	SLC2A1/ARPP19/RTN2/PID1/SELENOS/RHOQ	6
		GO:0021766	hippocampus development	5/374	81/18866	0.0224004	0.193926	0.169419	UQCRQ/NEUROD6/NEFL/BBS2/YWHAE	5
		GO:0033238	regulation of cellular amine metabolic process	5/374	81/18866	0.0224004	0.193926	0.169419	PSMB7/PSMA1/HPRT1/PSMD8/PSMA6	5
		GO:0034284	response to monosaccharide	9/374	207/18866	0.0226567	0.193926	0.169419	VSNL1/PRKACA/GSTP1/SLC8A1/GRIK5/GJA1/BAD/SELENOS/GJB6	9
		GO:0010232	vascular transport	2/374	12/18866	0.0226851	0.193926	0.169419	APOE/GJA1	2
		GO:0031340	positive regulation of vesicle fusion	2/374	12/18866	0.0226851	0.193926	0.169419	SNCA/SYT1	2
		GO:0051340	regulation of ligase activity	2/374	12/18866	0.0226851	0.193926	0.169419	TMSB4X/ANTKMT	2
		GO:0071107	response to parathyroid hormone	2/374	12/18866	0.0226851	0.193926	0.169419	PRKACA/GJA1	2
		GO:0071257	cellular response to electrical stimulus	2/374	12/18866	0.0226851	0.193926	0.169419	NEUROD2/SLC9A1	2
		GO:0072584	caveolin-mediated endocytosis	2/374	12/18866	0.0226851	0.193926	0.169419	MAPK3/MLC1	2
		GO:1901660	calcium ion export	2/374	12/18866	0.0226851	0.193926	0.169419	ATP2B1/YWHAE	2
		GO:0031338	regulation of vesicle fusion	3/374	31/18866	0.0230459	0.195652	0.170927	SNCA/SYT1/GRIK5	3
		GO:0086011	membrane repolarization during action potential	3/374	31/18866	0.0230459	0.195652	0.170927	ATP1A1/KCNIP2/YWHAE	3
		GO:1904292	regulation of ERAD pathway	3/374	31/18866	0.0230459	0.195652	0.170927	OS9/UBAC2/UBXN1	3
		GO:0007006	mitochondrial membrane organization	7/374	142/18866	0.023238	0.196774	0.171908	YWHAZ/YWHAG/IMMT/TMEM14A/BAD/YWHAE/SLC9A1	7
		GO:0071456	cellular response to hypoxia	9/374	208/18866	0.0232846	0.196774	0.171908	PSMB7/PSMA1/SLC8A1/STUB1/PSMD8/FAM162A/BAD/PSMA6/SLC9A1	9
		GO:0032720	negative regulation of tumor necrosis factor production	4/374	55/18866	0.0234548	0.197527	0.172566	GSTP1/AKAP8/SELENOS/TRIM27	4
		GO:0021954	central nervous system neuron development	5/374	82/18866	0.0234807	0.197527	0.172566	HPRT1/EPHA4/UQCRQ/SPTBN4/DCC	5
		GO:0016197	endosomal transport	10/374	244/18866	0.0241629	0.202803	0.177175	CHMP3/SPAG9/SNX17/RAB11FIP4/RAB10/YKT6/SNX1/MICALL2/AP5S1/TRIM27	10
		GO:0048638	regulation of developmental growth	13/374	353/18866	0.0244466	0.20472	0.178849	MAP1B/SYT1/SEMA6B/FTO/SPTBN4/APOE/ERBB4/GJA1/DCC/PLCB1/PARP2/BBS2/DBNL	13
		GO:0055117	regulation of cardiac muscle contraction	5/374	83/18866	0.0245941	0.205489	0.179521	CALM2/ATP1A1/PRKACA/SLC8A1/SLC9A1	5
		GO:0050732	negative regulation of peptidyl-tyrosine phosphorylation	4/374	56/18866	0.0248764	0.20658	0.180474	SRCIN1/PRKCZ/PPP2R1A/ERRFI1	4
		GO:0002082	regulation of oxidative phosphorylation	3/374	32/18866	0.0250654	0.20658	0.180474	SNCA/ANTKMT/COX7A2	3
		GO:0002724	regulation of T cell cytokine production	3/374	32/18866	0.0250654	0.20658	0.180474	PRKCZ/B2M/MAP3K7	3
		GO:0010880	regulation of release of sequestered calcium ion into cytosol by sarcoplasmic reticulum	3/374	32/18866	0.0250654	0.20658	0.180474	CALM2/PRKACA/SLC8A1	3
		GO:1903955	positive regulation of protein targeting to mitochondrion	3/374	32/18866	0.0250654	0.20658	0.180474	UBL5/SH3GLB1/MICALL2	3
		GO:0002223	stimulatory C-type lectin receptor signaling pathway	6/374	113/18866	0.0250938	0.20658	0.180474	PSMB7/PSMA1/PRKACA/PSMD8/PSMA6/MAP3K7	6
		GO:0002478	antigen processing and presentation of exogenous peptide antigen	8/374	177/18866	0.0251162	0.20658	0.180474	PSMB7/PSMA1/AP2A1/PSMD8/B2M/PSMA6/HLA-DRA/SAR1B	8
		GO:0043393	regulation of protein binding	9/374	211/18866	0.025243	0.207161	0.180982	MAPK3/EPHA4/PRKACA/STUB1/CLDN5/APOE/B2M/LRPAP1/IFIT2	9
		GO:0060401	cytosolic calcium ion transport	8/374	178/18866	0.0258628	0.208215	0.181903	SNCA/CALM2/PRKACA/ATP2B1/SLC8A1/ADCYAP1R1/YWHAE/SMDT1	8
		GO:0008645	hexose transmembrane transport	6/374	114/18866	0.0260629	0.208215	0.181903	SLC2A1/ARPP19/RTN2/PID1/SELENOS/RHOQ	6
		GO:0032411	positive regulation of transporter activity	6/374	114/18866	0.0260629	0.208215	0.181903	CALM2/TMSB4X/S100A1/KCNIP2/SLC9A1/ANTKMT	6
		GO:0098693	regulation of synaptic vesicle cycle	6/374	114/18866	0.0260629	0.208215	0.181903	SNCA/SYT1/PPFIA2/GRIK5/BACE1/SYP	6
		GO:0097479	synaptic vesicle localization	4/374	57/18866	0.026349	0.208215	0.181903	AP3S1/SNAP91/CNIH2/TMEM230	4
		GO:1903556	negative regulation of tumor necrosis factor superfamily cytokine production	4/374	57/18866	0.026349	0.208215	0.181903	GSTP1/AKAP8/SELENOS/TRIM27	4
		GO:0002674	negative regulation of acute inflammatory response	2/374	13/18866	0.026463	0.208215	0.181903	GSTP1/SELENOS	2
		GO:0010642	negative regulation of platelet-derived growth factor receptor signaling pathway	2/374	13/18866	0.026463	0.208215	0.181903	SNCA/SLC9A3R1	2
		GO:0016264	gap junction assembly	2/374	13/18866	0.026463	0.208215	0.181903	GJA1/GJB6	2
		GO:0031115	negative regulation of microtubule polymerization	2/374	13/18866	0.026463	0.208215	0.181903	SNCA/STMN2	2
		GO:0031953	negative regulation of protein autophosphorylation	2/374	13/18866	0.026463	0.208215	0.181903	JUN/ERRFI1	2
		GO:0032096	negative regulation of response to food	2/374	13/18866	0.026463	0.208215	0.181903	CCK/BBS2	2
		GO:0032099	negative regulation of appetite	2/374	13/18866	0.026463	0.208215	0.181903	CCK/BBS2	2
		GO:0033127	regulation of histone phosphorylation	2/374	13/18866	0.026463	0.208215	0.181903	MAPK3/AKAP8	2
		GO:0045579	positive regulation of B cell differentiation	2/374	13/18866	0.026463	0.208215	0.181903	BAD/PPP2R3C	2
		GO:0051481	negative regulation of cytosolic calcium ion concentration	2/374	13/18866	0.026463	0.208215	0.181903	ATP2B1/SLC8A1	2
		GO:0070839	divalent metal ion export	2/374	13/18866	0.026463	0.208215	0.181903	ATP2B1/YWHAE	2
		GO:1900272	negative regulation of long-term synaptic potentiation	2/374	13/18866	0.026463	0.208215	0.181903	EPHA4/APOE	2
		GO:0034620	cellular response to unfolded protein	7/374	146/18866	0.0265369	0.208215	0.181903	COPS5/MYDGF/KLHDC3/RHBDD2/STUB1/ATP6V0D1/SELENOS	7
		GO:0048813	dendrite morphogenesis	7/374	146/18866	0.0265369	0.208215	0.181903	SIPA1L1/PPFIA2/HPRT1/EPHA4/SRCIN1/LZTS3/DBNL	7
		GO:0007254	JNK cascade	9/374	213/18866	0.0266119	0.208215	0.181903	COPS5/EPHA4/SPAG9/GSTP1/GPS1/AIDA/PLCB1/DBNL/MAP3K7	9
		GO:0016051	carbohydrate biosynthetic process	9/374	213/18866	0.0266119	0.208215	0.181903	SNCA/AP2A1/SLC25A11/PDXP/SLC2A1/ADCYAP1R1/NANS/ARPP19/SELENOS	9
		GO:0006970	response to osmotic stress	5/374	85/18866	0.0269214	0.209748	0.183242	SLC2A1/BAD/ERRFI1/MLC1/TSC22D2	5
		GO:0031110	regulation of microtubule polymerization or depolymerization	5/374	85/18866	0.0269214	0.209748	0.183242	SNCA/MAP1B/SLC39A12/STMN2/GAS2L1	5
		GO:0001975	response to amphetamine	3/374	33/18866	0.027177	0.21085	0.184205	HPRT1/HDAC9/RGS10	3
		GO:0010039	response to iron ion	3/374	33/18866	0.027177	0.21085	0.184205	SNCA/B2M/ACO1	3
		GO:1904064	positive regulation of cation transmembrane transport	7/374	147/18866	0.027409	0.212204	0.185388	SNCA/CALM2/TMSB4X/S100A1/KCNIP2/SLC9A1/ANTKMT	7
		GO:0042176	regulation of protein catabolic process	14/374	397/18866	0.02767	0.213777	0.186762	SNCA/OS9/EPHA4/PRKACA/UBAC2/STUB1/GFAP/APOE/GJA1/SNX1/UBXN1/DESI1/ATRAID/MSN	14
		GO:0009636	response to toxic substance	10/374	250/18866	0.0279427	0.214681	0.187552	MAP1B/MAPK3/GSTP1/MT1G/MT1M/APOE/MGST1/NEFL/MGST3/SELENOS	10
		GO:0002220	innate immune response activating cell surface receptor signaling pathway	6/374	116/18866	0.0280749	0.214681	0.187552	PSMB7/PSMA1/PRKACA/PSMD8/PSMA6/MAP3K7	6
		GO:0015749	monosaccharide transmembrane transport	6/374	116/18866	0.0280749	0.214681	0.187552	SLC2A1/ARPP19/RTN2/PID1/SELENOS/RHOQ	6
		GO:1903828	negative regulation of cellular protein localization	6/374	116/18866	0.0280749	0.214681	0.187552	ASTN2/OS9/CABP1/UBAC2/PID1/RHOQ	6
		GO:0006919	activation of cysteine-type endopeptidase activity involved in apoptotic process	5/374	86/18866	0.0281358	0.214681	0.187552	SNCA/CCK/FAM162A/BAD/MTCH1	5
		GO:0097756	negative regulation of blood vessel diameter	5/374	86/18866	0.0281358	0.214681	0.187552	DOCK5/ATP2B1/SLC8A1/GJA1/BBS2	5
		GO:0008361	regulation of cell size	8/374	181/18866	0.0281951	0.21469	0.187559	MAP1B/SEMA6B/APOE/SLC9A3R1/DCC/DBNL/RAP1GAP2/MSN	8
		GO:0002758	innate immune response-activating signal transduction	6/374	117/18866	0.0291183	0.221263	0.193302	PSMB7/PSMA1/PRKACA/PSMD8/PSMA6/MAP3K7	6
		GO:0000038	very long-chain fatty acid metabolic process	3/374	34/18866	0.0293807	0.221463	0.193476	ACSL6/ACSL1/ABCD3	3
		GO:0035633	maintenance of blood-brain barrier	3/374	34/18866	0.0293807	0.221463	0.193476	CLDN5/GJA1/GJB6	3
		GO:0048013	ephrin receptor signaling pathway	5/374	87/18866	0.0293844	0.221463	0.193476	SIPA1L1/EPHA4/AP2A1/ARPC3/ANKS1A	5
		GO:1903363	negative regulation of cellular protein catabolic process	5/374	87/18866	0.0293844	0.221463	0.193476	OS9/EPHA4/UBAC2/UBXN1/ATRAID	5
		GO:0031102	neuron projection regeneration	4/374	59/18866	0.029448	0.221471	0.193483	MAP1B/JUN/EPHA4/NEFL	4
		GO:1902749	regulation of cell cycle G2/M phase transition	9/374	217/18866	0.0295054	0.221471	0.193483	PSMB7/PSMA1/YWHAG/PRKACA/TUBB/PSMD8/PPP2R1A/PSMA6/YWHAE	9
		GO:0021987	cerebral cortex development	6/374	118/18866	0.0301868	0.222419	0.194312	SLC2A1/BAD/NEFL/PLCB1/BBS2/YWHAE	6
		GO:0034219	carbohydrate transmembrane transport	6/374	118/18866	0.0301868	0.222419	0.194312	SLC2A1/ARPP19/RTN2/PID1/SELENOS/RHOQ	6
		GO:0036294	cellular response to decreased oxygen levels	9/374	218/18866	0.0302619	0.222419	0.194312	PSMB7/PSMA1/SLC8A1/STUB1/PSMD8/FAM162A/BAD/PSMA6/SLC9A1	9
		GO:0019896	axonal transport of mitochondrion	2/374	14/18866	0.0304749	0.222419	0.194312	NEFL/UCHL1	2
		GO:0032802	low-density lipoprotein particle receptor catabolic process	2/374	14/18866	0.0304749	0.222419	0.194312	AP2A1/APOE	2
		GO:0036295	cellular response to increased oxygen levels	2/374	14/18866	0.0304749	0.222419	0.194312	ATP6V0D1/ATP6V1G1	2
		GO:0044154	histone H3-K14 acetylation	2/374	14/18866	0.0304749	0.222419	0.194312	NAP1L2/MEAF6	2
		GO:0046037	GMP metabolic process	2/374	14/18866	0.0304749	0.222419	0.194312	HPRT1/IMPDH2	2
		GO:0047484	regulation of response to osmotic stress	2/374	14/18866	0.0304749	0.222419	0.194312	BAD/MLC1	2
		GO:0050966	detection of mechanical stimulus involved in sensory perception of pain	2/374	14/18866	0.0304749	0.222419	0.194312	BACE1/PHF24	2
		GO:0060732	positive regulation of inositol phosphate biosynthetic process	2/374	14/18866	0.0304749	0.222419	0.194312	SNCA/ADCYAP1R1	2
		GO:0090128	regulation of synapse maturation	2/374	14/18866	0.0304749	0.222419	0.194312	YWHAZ/NEUROD2	2
		GO:1901070	guanosine-containing compound biosynthetic process	2/374	14/18866	0.0304749	0.222419	0.194312	HPRT1/IMPDH2	2
		GO:1904152	regulation of retrograde protein transport, ER to cytosol	2/374	14/18866	0.0304749	0.222419	0.194312	OS9/UBAC2	2
		GO:0002028	regulation of sodium ion transport	5/374	88/18866	0.0306675	0.222517	0.194397	ATP1A1/SLC8A1/SPTBN4/SLC9A3R1/SLC9A1	5
		GO:0070125	mitochondrial translational elongation	5/374	88/18866	0.0306675	0.222517	0.194397	MRPS24/MRPL28/MRPL37/MRPL57/MRPS34	5
		GO:0046328	regulation of JNK cascade	8/374	184/18866	0.0306691	0.222517	0.194397	COPS5/EPHA4/SPAG9/GSTP1/AIDA/PLCB1/DBNL/MAP3K7	8
		GO:0001836	release of cytochrome c from mitochondria	4/374	60/18866	0.0310751	0.224261	0.195922	CCK/JUN/FAM162A/BAD	4
		GO:0097755	positive regulation of blood vessel diameter	4/374	60/18866	0.0310751	0.224261	0.195922	DOCK5/APOE/GJA1/BBS2	4
		GO:0035567	non-canonical Wnt signaling pathway	7/374	151/18866	0.0310918	0.224261	0.195922	PSMB7/PSMA1/AP2A1/PSMD8/PLCB1/PSMA6/MAP3K7	7
		GO:0019884	antigen processing and presentation of exogenous antigen	8/374	185/18866	0.0315259	0.225828	0.19729	PSMB7/PSMA1/AP2A1/PSMD8/B2M/PSMA6/HLA-DRA/SAR1B	8
		GO:0007409	axonogenesis	16/374	482/18866	0.0316195	0.225828	0.19729	MAP1B/MAPK3/SIPA1L1/SEMA6B/CCK/EPHA4/NPTX1/SPTBN4/GPC1/APOE/DCC/RAB10/NEFL/UCHL1/DBNL/NTNG2	16
		GO:0014046	dopamine secretion	3/374	35/18866	0.0316759	0.225828	0.19729	SNCA/SYT1/SNCG	3
		GO:0014059	regulation of dopamine secretion	3/374	35/18866	0.0316759	0.225828	0.19729	SNCA/SYT1/SNCG	3
		GO:0032801	receptor catabolic process	3/374	35/18866	0.0316759	0.225828	0.19729	AP2A1/APOE/SH3GLB1	3
		GO:1905606	regulation of presynapse assembly	3/374	35/18866	0.0316759	0.225828	0.19729	SNCA/CLSTN3/NTNG2	3
		GO:0070126	mitochondrial translational termination	5/374	89/18866	0.0319853	0.227157	0.198451	MRPS24/MRPL28/MRPL37/MRPL57/MRPS34	5
		GO:1901019	regulation of calcium ion transmembrane transporter activity	5/374	89/18866	0.0319853	0.227157	0.198451	CALM2/PRKACA/S100A1/YWHAE/SLC9A1	5
		GO:0043488	regulation of mRNA stability	8/374	186/18866	0.0323989	0.229213	0.200247	PSMB7/YWHAZ/PSMA1/FTO/PSMD8/FASTKD1/PSMA6/HNRNPA0	8
		GO:0050770	regulation of axonogenesis	8/374	186/18866	0.0323989	0.229213	0.200247	MAP1B/SIPA1L1/SEMA6B/EPHA4/APOE/DCC/NEFL/DBNL	8
		GO:0032984	protein-containing complex disassembly	12/374	330/18866	0.0324857	0.229388	0.2004	MAP1B/CHMP3/MICAL2/MRPS24/PDXP/SMARCE1/STMN2/MRPL28/SPTBN4/MRPL37/MRPL57/MRPS34	12
		GO:0008154	actin polymerization or depolymerization	9/374	221/18866	0.0326124	0.229843	0.200798	MICAL2/PDXP/SPTBN4/TMSB4X/ARPC3/TMSB10/DBNL/MICALL2/TRIM27	9
		GO:0008203	cholesterol metabolic process	7/374	153/18866	0.033052	0.232497	0.203117	MSMO1/SC5D/SNX17/MVK/APOE/LSS/SEC14L2	7
		GO:0048639	positive regulation of developmental growth	8/374	187/18866	0.0332882	0.233168	0.203702	MAP1B/SYT1/SPTBN4/ERBB4/PLCB1/PARP2/BBS2/DBNL	8
		GO:1901617	organic hydroxy compound biosynthetic process	10/374	258/18866	0.0336138	0.233168	0.203702	SNCA/MSMO1/SC5D/PDXP/MVK/APOE/ADCYAP1R1/LSS/SEC14L2/PPIP5K1	10
		GO:0014808	release of sequestered calcium ion into cytosol by sarcoplasmic reticulum	3/374	36/18866	0.0340623	0.233168	0.203702	CALM2/PRKACA/SLC8A1	3
		GO:0021955	central nervous system neuron axonogenesis	3/374	36/18866	0.0340623	0.233168	0.203702	EPHA4/SPTBN4/DCC	3
		GO:0033280	response to vitamin D	3/374	36/18866	0.0340623	0.233168	0.203702	GDAP1/ATP2B1/CDKN2D	3
		GO:0099174	regulation of presynapse organization	3/374	36/18866	0.0340623	0.233168	0.203702	SNCA/CLSTN3/NTNG2	3
		GO:0010977	negative regulation of neuron projection development	7/374	154/18866	0.0340624	0.233168	0.203702	SEMA6B/EPHA4/STMN2/APOE/B2M/DCC/RAP1GAP2	7
		GO:0043312	neutrophil degranulation	16/374	487/18866	0.0342569	0.233168	0.203702	SNAP25/PSMB7/TOLLIP/GSTP1/TUBB/FTL/ATP6V0C/RNASET2/B2M/CHI3L1/MGST1/RAB10/DBNL/PKM/IMPDH2/FCGR2A	16
		GO:0010676	positive regulation of cellular carbohydrate metabolic process	4/374	62/18866	0.0344851	0.233168	0.203702	SNCA/ADCYAP1R1/BAD/ARPP19	4
		GO:0002091	negative regulation of receptor internalization	2/374	15/18866	0.0347103	0.233168	0.203702	NECAB2/LRPAP1	2
		GO:0010273	detoxification of copper ion	2/374	15/18866	0.0347103	0.233168	0.203702	MT1G/MT1M	2
		GO:0015936	coenzyme A metabolic process	2/374	15/18866	0.0347103	0.233168	0.203702	COASY/PANK3	2
		GO:0032105	negative regulation of response to extracellular stimulus	2/374	15/18866	0.0347103	0.233168	0.203702	CCK/BBS2	2
		GO:0032108	negative regulation of response to nutrient levels	2/374	15/18866	0.0347103	0.233168	0.203702	CCK/BBS2	2
		GO:0045198	establishment of epithelial cell apical/basal polarity	2/374	15/18866	0.0347103	0.233168	0.203702	SLC9A3R1/MSN	2
		GO:0048308	organelle inheritance	2/374	15/18866	0.0347103	0.233168	0.203702	MAPK3/YWHAZ	2
		GO:0048313	Golgi inheritance	2/374	15/18866	0.0347103	0.233168	0.203702	MAPK3/YWHAZ	2
		GO:0071474	cellular hyperosmotic response	2/374	15/18866	0.0347103	0.233168	0.203702	SLC2A1/ERRFI1	2
		GO:0099188	postsynaptic cytoskeleton organization	2/374	15/18866	0.0347103	0.233168	0.203702	NEFL/DBNL	2
		GO:1902187	negative regulation of viral release from host cell	2/374	15/18866	0.0347103	0.233168	0.203702	CHMP3/TRIM27	2
		GO:1990169	stress response to copper ion	2/374	15/18866	0.0347103	0.233168	0.203702	MT1G/MT1M	2
		GO:0051928	positive regulation of calcium ion transport	6/374	122/18866	0.0347167	0.233168	0.203702	SNCA/CALM2/ATP2B1/S100A1/ADCYAP1R1/SLC9A1	6
		GO:0033273	response to vitamin	5/374	91/18866	0.0347257	0.233168	0.203702	MAP1B/GDAP1/ATP2B1/GSTP1/CDKN2D	5
		GO:0045921	positive regulation of exocytosis	5/374	91/18866	0.0347257	0.233168	0.203702	SNCA/SYT1/VSNL1/CADPS2/RAB27B	5
		GO:0051899	membrane depolarization	5/374	91/18866	0.0347257	0.233168	0.203702	CCK/JUN/SLC8A1/PRKCZ/PPP2R3C	5
		GO:1903362	regulation of cellular protein catabolic process	10/374	260/18866	0.0351489	0.235581	0.205811	OS9/EPHA4/PRKACA/UBAC2/STUB1/APOE/UBXN1/DESI1/ATRAID/MSN	10
		GO:1902903	regulation of supramolecular fiber organization	13/374	373/18866	0.0358221	0.239657	0.209372	SNCA/MAP1B/SLC39A12/PDXP/STMN2/SPTBN4/TMSB4X/ARPC3/APOE/TMSB10/DBNL/SLC9A1/TRIM27	13
		GO:0002283	neutrophil activation involved in immune response	16/374	490/18866	0.0359146	0.239842	0.209533	SNAP25/PSMB7/TOLLIP/GSTP1/TUBB/FTL/ATP6V0C/RNASET2/B2M/CHI3L1/MGST1/RAB10/DBNL/PKM/IMPDH2/FCGR2A	16
		GO:1902904	negative regulation of supramolecular fiber organization	7/374	156/18866	0.0361442	0.240536	0.210139	SNCA/MAP1B/STMN2/SPTBN4/TMSB4X/APOE/TMSB10	7
		GO:1905897	regulation of response to endoplasmic reticulum stress	5/374	92/18866	0.0361488	0.240536	0.210139	COPS5/OS9/UBAC2/SELENOS/UBXN1	5
		GO:0006521	regulation of cellular amino acid metabolic process	4/374	63/18866	0.0362684	0.240898	0.210455	PSMB7/PSMA1/PSMD8/PSMA6	4
		GO:0006882	cellular zinc ion homeostasis	3/374	37/18866	0.0365392	0.241827	0.211267	SLC39A12/MT1G/MT1M	3
		GO:1903514	release of sequestered calcium ion into cytosol by endoplasmic reticulum	3/374	37/18866	0.0365392	0.241827	0.211267	CALM2/PRKACA/SLC8A1	3
		GO:0098739	import across plasma membrane	7/374	157/18866	0.037216	0.245865	0.214795	ATP1A1/SLC39A12/SLC8A1/SLC1A3/SLC2A1/SLC9A3R1/SLC9A1	7
		GO:0021953	central nervous system neuron differentiation	8/374	192/18866	0.0379845	0.250494	0.218839	HPRT1/EPHA4/LMO4/UQCRQ/SPTBN4/ERBB4/B2M/DCC	8
		GO:0046173	polyol biosynthetic process	4/374	64/18866	0.038104	0.250834	0.219136	SNCA/PDXP/ADCYAP1R1/PPIP5K1	4
		GO:1903578	regulation of ATP metabolic process	6/374	125/18866	0.0383872	0.252249	0.220373	SNCA/TMSB4X/PRKAG1/PID1/ANTKMT/COX7A2	6
		GO:1903523	negative regulation of blood circulation	3/374	38/18866	0.0391062	0.252819	0.22087	DOCK5/ATP1A1/SPTBN4	3
		GO:0010919	regulation of inositol phosphate biosynthetic process	2/374	16/18866	0.0391586	0.252819	0.22087	SNCA/ADCYAP1R1	2
		GO:0034380	high-density lipoprotein particle assembly	2/374	16/18866	0.0391586	0.252819	0.22087	PRKACA/APOE	2
		GO:0043508	negative regulation of JUN kinase activity	2/374	16/18866	0.0391586	0.252819	0.22087	GSTP1/AIDA	2
		GO:0045838	positive regulation of membrane potential	2/374	16/18866	0.0391586	0.252819	0.22087	MTLN/BAD	2
		GO:0046325	negative regulation of glucose import	2/374	16/18866	0.0391586	0.252819	0.22087	PID1/SELENOS	2
		GO:0050710	negative regulation of cytokine secretion	2/374	16/18866	0.0391586	0.252819	0.22087	HDAC9/PPP1R11	2
		GO:0051284	positive regulation of sequestering of calcium ion	2/374	16/18866	0.0391586	0.252819	0.22087	CALM2/MTLN	2
		GO:0055119	relaxation of cardiac muscle	2/374	16/18866	0.0391586	0.252819	0.22087	ATP1A1/SLC8A1	2
		GO:0099170	postsynaptic modulation of chemical synaptic transmission	2/374	16/18866	0.0391586	0.252819	0.22087	DCC/PLCB1	2
		GO:0048002	antigen processing and presentation of peptide antigen	8/374	194/18866	0.0399815	0.2573	0.224785	PSMB7/PSMA1/AP2A1/PSMD8/B2M/PSMA6/HLA-DRA/SAR1B	8
		GO:0046782	regulation of viral transcription	4/374	65/18866	0.0399919	0.2573	0.224785	JUN/NELFE/TRIM27/POLR2E	4
		GO:0045666	positive regulation of neuron differentiation	13/374	380/18866	0.0405786	0.259604	0.226798	MAP1B/SYT1/ENC1/EPHA4/AP2A1/SPAG9/STMN2/NEUROD2/NAP1L2/APOE/NEFL/DBNL/CRTC1	13
		GO:0006903	vesicle targeting	5/374	95/18866	0.0406312	0.259604	0.226798	CUL3/TRAPPC6A/CNIH2/YKT6/SAR1B	5
		GO:0050709	negative regulation of protein secretion	5/374	95/18866	0.0406312	0.259604	0.226798	VSNL1/SRCIN1/APOE/HDAC9/PPP1R11	5
		GO:0097711	ciliary basal body-plasma membrane docking	5/374	95/18866	0.0406312	0.259604	0.226798	YWHAG/PRKACA/TUBB/PPP2R1A/YWHAE	5
		GO:1905477	positive regulation of protein localization to membrane	6/374	127/18866	0.0409666	0.261093	0.228099	YWHAZ/YWHAG/BAD/NECAB2/MIEF1/YWHAE	6
		GO:0043487	regulation of RNA stability	8/374	195/18866	0.0410057	0.261093	0.228099	PSMB7/YWHAZ/PSMA1/FTO/PSMD8/FASTKD1/PSMA6/HNRNPA0	8
		GO:0006778	porphyrin-containing compound metabolic process	3/374	39/18866	0.0417623	0.263188	0.229929	BLVRB/SLC25A38/EIF2AK1	3
		GO:0031111	negative regulation of microtubule polymerization or depolymerization	3/374	39/18866	0.0417623	0.263188	0.229929	SNCA/MAP1B/STMN2	3
		GO:0045022	early endosome to late endosome transport	3/374	39/18866	0.0417623	0.263188	0.229929	CHMP3/MAPK3/MSN	3
		GO:0055069	zinc ion homeostasis	3/374	39/18866	0.0417623	0.263188	0.229929	SLC39A12/MT1G/MT1M	3
		GO:1901021	positive regulation of calcium ion transmembrane transporter activity	3/374	39/18866	0.0417623	0.263188	0.229929	CALM2/S100A1/SLC9A1	3
		GO:1901068	guanosine-containing compound metabolic process	3/374	39/18866	0.0417623	0.263188	0.229929	HPRT1/IMPDH2/RHOQ	3
		GO:0048207	vesicle targeting, rough ER to cis-Golgi	4/374	66/18866	0.0419323	0.263361	0.23008	CUL3/TRAPPC6A/CNIH2/SAR1B	4
		GO:0048208	COPII vesicle coating	4/374	66/18866	0.0419323	0.263361	0.23008	CUL3/TRAPPC6A/CNIH2/SAR1B	4
		GO:1902652	secondary alcohol metabolic process	7/374	162/18866	0.0428881	0.268906	0.234925	MSMO1/SC5D/SNX17/MVK/APOE/LSS/SEC14L2	7
		GO:0009749	response to glucose	8/374	197/18866	0.0431062	0.269014	0.235019	VSNL1/PRKACA/SLC8A1/GRIK5/GJA1/BAD/SELENOS/GJB6	8
		GO:1901216	positive regulation of neuron death	5/374	97/18866	0.0437984	0.269014	0.235019	SNCA/JUN/GRIK5/BACE1/BAD	5
		GO:1901655	cellular response to ketone	5/374	97/18866	0.0437984	0.269014	0.235019	ATP2B1/AKAP8/ERRFI1/GNAI1/MSN	5
		GO:0007250	activation of NF-kappaB-inducing kinase activity	2/374	17/18866	0.0438098	0.269014	0.235019	CHI3L1/MAP3K7	2
		GO:0044539	long-chain fatty acid import into cell	2/374	17/18866	0.0438098	0.269014	0.235019	SLC2A1/ACSL1	2
		GO:0061687	detoxification of inorganic compound	2/374	17/18866	0.0438098	0.269014	0.235019	MT1G/MT1M	2
		GO:0097501	stress response to metal ion	2/374	17/18866	0.0438098	0.269014	0.235019	MT1G/MT1M	2
		GO:0098962	regulation of postsynaptic neurotransmitter receptor activity	2/374	17/18866	0.0438098	0.269014	0.235019	NPTX1/CNIH2	2
		GO:0140354	lipid import into cell	2/374	17/18866	0.0438098	0.269014	0.235019	SLC2A1/ACSL1	2
		GO:0033866	nucleoside bisphosphate biosynthetic process	4/374	67/18866	0.0439251	0.269014	0.235019	ACSL6/COASY/ACSL1/PANK3	4
		GO:0034030	ribonucleoside bisphosphate biosynthetic process	4/374	67/18866	0.0439251	0.269014	0.235019	ACSL6/COASY/ACSL1/PANK3	4
		GO:0034033	purine nucleoside bisphosphate biosynthetic process	4/374	67/18866	0.0439251	0.269014	0.235019	ACSL6/COASY/ACSL1/PANK3	4
		GO:0036498	IRE1-mediated unfolded protein response	4/374	67/18866	0.0439251	0.269014	0.235019	COPS5/MYDGF/KLHDC3/ATP6V0D1	4
		GO:1903672	positive regulation of sprouting angiogenesis	4/374	67/18866	0.0439251	0.269014	0.235019	AKT3/S100A1/HDAC9/PKM	4
		GO:0007626	locomotory behavior	8/374	198/18866	0.0441827	0.270143	0.236005	SNAP25/SNCG/HPRT1/EPHA4/SPTBN4/APOE/UCHL1/ARCN1	8
		GO:0030501	positive regulation of bone mineralization	3/374	40/18866	0.0445068	0.271675	0.237344	ATP2B1/SLC8A1/ATRAID	3
		GO:0006942	regulation of striated muscle contraction	5/374	98/18866	0.0454361	0.27689	0.2419	CALM2/ATP1A1/PRKACA/SLC8A1/SLC9A1	5
		GO:0006816	calcium ion transport	14/374	426/18866	0.0455804	0.277312	0.242268	SNCA/CALM2/TSPAN13/PRKACA/ATP2B1/CACNG8/SLC8A1/S100A1/ADCYAP1R1/GJA1/YWHAE/SLC9A1/SMDT1/TRIM27	14
		GO:0016239	positive regulation of macroautophagy	4/374	68/18866	0.0459702	0.279224	0.243938	MAPK3/SESN3/SH3GLB1/MAP3K7	4
		GO:1901888	regulation of cell junction assembly	8/374	200/18866	0.0463884	0.281197	0.245662	SNCA/CLSTN2/PRKACA/CLSTN3/CLDN5/GJA1/NTNG2/SLC9A1	8
		GO:0010508	positive regulation of autophagy	6/374	131/18866	0.0464473	0.281197	0.245662	MAPK3/SESN3/BAD/SH3GLB1/TRIM27/MAP3K7	6
		GO:0043255	regulation of carbohydrate biosynthetic process	5/374	99/18866	0.0471099	0.284264	0.248342	SNCA/AP2A1/ADCYAP1R1/ARPP19/SELENOS	5
		GO:0032872	regulation of stress-activated MAPK cascade	9/374	237/18866	0.0472974	0.284264	0.248342	MAPK3/COPS5/EPHA4/SPAG9/GSTP1/AIDA/PLCB1/DBNL/MAP3K7	9
		GO:0050434	positive regulation of viral transcription	3/374	41/18866	0.0473389	0.284264	0.248342	JUN/NELFE/POLR2E	3
		GO:0072524	pyridine-containing compound metabolic process	3/374	41/18866	0.0473389	0.284264	0.248342	NMNAT2/PDXP/NAXE	3
		GO:0099622	cardiac muscle cell membrane repolarization	3/374	41/18866	0.0473389	0.284264	0.248342	ATP1A1/KCNIP2/YWHAE	3
		GO:0031099	regeneration	8/374	201/18866	0.0475178	0.284454	0.248507	MAP1B/JUN/EPHA4/GSTP1/ERBB4/RPL30/NEFL/PKM	8
		GO:0070588	calcium ion transmembrane transport	11/374	312/18866	0.0475245	0.284454	0.248507	SNCA/CALM2/TSPAN13/PRKACA/ATP2B1/CACNG8/SLC8A1/S100A1/YWHAE/SLC9A1/SMDT1	11
		GO:1903531	negative regulation of secretion by cell	7/374	166/18866	0.0478081	0.285688	0.249586	SNCA/VSNL1/SRCIN1/APOE/GJA1/HDAC9/PPP1R11	7
		GO:0021756	striatum development	2/374	18/18866	0.0486542	0.287552	0.251214	HPRT1/BBS2	2
		GO:0048268	clathrin coat assembly	2/374	18/18866	0.0486542	0.287552	0.251214	CLTB/SNAP91	2
		GO:0071786	endoplasmic reticulum tubular network organization	2/374	18/18866	0.0486542	0.287552	0.251214	REEP1/RAB10	2
		GO:1900221	regulation of amyloid-beta clearance	2/374	18/18866	0.0486542	0.287552	0.251214	APOE/LRPAP1	2
		GO:1990000	amyloid fibril formation	2/374	18/18866	0.0486542	0.287552	0.251214	APOE/B2M	2
		GO:2000369	regulation of clathrin-dependent endocytosis	2/374	18/18866	0.0486542	0.287552	0.251214	SNAP91/SCYL2	2
		GO:0009746	response to hexose	8/374	202/18866	0.048665	0.287552	0.251214	VSNL1/PRKACA/SLC8A1/GRIK5/GJA1/BAD/SELENOS/GJB6	8
		GO:0045807	positive regulation of endocytosis	5/374	100/18866	0.0488198	0.288006	0.251611	SNCA/AP2A1/APOE/B2M/SCYL2	5
		GO:0042177	negative regulation of protein catabolic process	6/374	133/18866	0.0493503	0.290518	0.253805	SNCA/OS9/EPHA4/UBAC2/UBXN1/ATRAID	6
		GO:0070838	divalent metal ion transport	15/374	471/18866	0.049403	0.290518	0.253805	SNCA/CALM2/TSPAN13/SLC39A12/PRKACA/ATP2B1/CACNG8/SLC8A1/S100A1/ADCYAP1R1/GJA1/YWHAE/SLC9A1/SMDT1/TRIM27	15

## Sheet: AT8_down_level 3
DEGs in this data sheet were identified by comparing genes in AT8 positive spots with genes in its level 3 spots, which are 245 µm away from AT8 positive spots. All the DEGs in this data sheet were significantly downregulated in AT8 positive spots than in level 3 spots. The pathway analysis was performed as previously described. Top pathways of interest with significance (adjust p value is less t…
		GO enrichment analysis									KEGG pathway analysis									Reactome analysis
Gene	sample	ID	Description	GeneRatio	BgRatio	pvalue	p.adjust	qvalue	geneID	Count	ID	Description	GeneRatio	BgRatio	pvalue	p.adjust	qvalue	geneID	Count	ID	Description	GeneRatio	BgRatio	pvalue	p.adjust	qvalue	geneID	Count
CDKAL1	AT8_down	GO:0006605	protein targeting	35/521	444/18866	2.84744e-08	0.000127721	0.00011219	RPSA/ZDHHC19/UBA52/NLGN1/GSTK1/PRNP/RPS27/NACAD/LAMP2/RPL35/RPL37/RHOU/HOMER3/TSPO/RPL17/PEX16/RPS29/RPS17/PEX6/SPCS3/EXOC4/RPL4/TOMM20/SREBF2/AKT2/CSNK2A2/TRAM1/PIK3R4/TRAK2/UBE2L3/RPS23/RPS27A/RPL15/RPL13A/RPL8	35	hsa03010	Ribosome	15/253	158/8111	0.000115981	0.0330547	0.0295447	RPSA/UBA52/RPS27/RPL35/RPL37/RPL17/RPS29/RPS17/RPS17/MRPL14/RPL4/RPS23/RPS27A/RPL15/RPL13A/RPL8	15	R-HSA-156902	Peptide chain elongation	15/331	89/10704	7.90939e-08	6.81901e-05	5.42753e-05	RPSA/UBA52/EEF1A1/RPS27/RPL35/RPL37/RPL17/RPS29/RPS17/RPL4/RPS23/RPS27A/RPL15/RPL13A/RPL8	15
ZKSCAN7	AT8_down	GO:0072599	establishment of protein localization to endoplasmic reticulum	17/521	124/18866	5.49811e-08	0.000127721	0.00011219	RPSA/UBA52/RPS27/RPL35/RPL37/RPL17/RPS29/RPS17/RAB3GAP2/SPCS3/RPL4/TRAM1/RPS23/RPS27A/RPL15/RPL13A/RPL8	17	hsa04921	Oxytocin signaling pathway	14/253	154/8111	0.000308002	0.0438903	0.0392297	CCND1/SRC/CACNA1C/CACNA1C/PPP1R12B/PPP1R12A/PPP3CA/PRKAB2/ACTG1/CAMK1/CAMK2A/CACNG8/RCAN1/ADCY1/ROCK2	14	R-HSA-156842	Eukaryotic Translation Elongation	15/331	93/10704	1.4473e-07	6.81901e-05	5.42753e-05	RPSA/UBA52/EEF1A1/RPS27/RPL35/RPL37/RPL17/RPS29/RPS17/RPL4/RPS23/RPS27A/RPL15/RPL13A/RPL8	15
ARL4C	AT8_down	GO:0006614	SRP-dependent cotranslational protein targeting to membrane	15/521	105/18866	1.92105e-07	0.000169442	0.000148838	RPSA/UBA52/RPS27/RPL35/RPL37/RPL17/RPS29/RPS17/RPL4/TRAM1/RPS23/RPS27A/RPL15/RPL13A/RPL8	15	hsa05171	Coronavirus disease - COVID-19	17/253	232/8111	0.000912007	0.0651989	0.0582756	RPSA/UBA52/MAPK14/DDX58/RPS27/RPL35/RPL37/RPL17/RPS29/RPS17/RPS17/RPL4/RELA/RPS23/RPS27A/RPL15/RPL13A/RPL8	17	R-HSA-975956	Nonsense Mediated Decay (NMD) independent of the Exon Junction Complex (EJC)	15/331	95/10704	1.93356e-07	6.81901e-05	5.42753e-05	RPSA/UBA52/NCBP1/RPS27/RPL35/RPL37/RPL17/RPS29/RPS17/RPL4/RPS23/RPS27A/RPL15/RPL13A/RPL8	15
TOR4A	AT8_down	GO:0000184	nuclear-transcribed mRNA catabolic process, nonsense-mediated decay	16/521	120/18866	2.00321e-07	0.000169442	0.000148838	RPSA/UBA52/NCBP1/RPS27/RPL35/RPL37/RPL17/RPS29/RPS17/RPL4/SMG9/RPS23/RPS27A/RPL15/RPL13A/RPL8	16	hsa04925	Aldosterone synthesis and secretion	10/253	98/8111	0.000915072	0.0651989	0.0582756	PRKCE/NR4A2/POMC/ATF4/CACNA1C/CACNA1C/CAMK1/CAMK2A/ATP2B1/ADCY1/ATP1A1	10	R-HSA-1799339	SRP-dependent cotranslational protein targeting to membrane	16/331	112/10704	3.13532e-07	6.85754e-05	5.4582e-05	RPSA/UBA52/RPS27/RPL35/RPL37/RPL17/RPS29/RPS17/SPCS3/RPL4/TRAM1/RPS23/RPS27A/RPL15/RPL13A/RPL8	16
CLMN	AT8_down	GO:0045047	protein targeting to ER	16/521	120/18866	2.00321e-07	0.000169442	0.000148838	RPSA/UBA52/RPS27/RPL35/RPL37/RPL17/RPS29/RPS17/SPCS3/RPL4/TRAM1/RPS23/RPS27A/RPL15/RPL13A/RPL8	16	hsa04211	Longevity regulating pathway	9/253	89/8111	0.0017469	0.0995734	0.089	KL/ATF4/PRKAB2/AKT2/IRS2/TSC1/RPS6KB1/RELA/ADCY1	9	R-HSA-9633012	Response of EIF2AK4 (GCN2) to amino acid deficiency	15/331	101/10704	4.40575e-07	6.85754e-05	5.4582e-05	RPSA/UBA52/RPS27/RPL35/RPL37/RPL17/RPS29/RPS17/ATF4/RPL4/RPS23/RPS27A/RPL15/RPL13A/RPL8	15
WASF3	AT8_down	GO:0070972	protein localization to endoplasmic reticulum	18/521	152/18866	2.18823e-07	0.000169442	0.000148838	RPSA/UBA52/RPS27/RPL35/RPL37/RPL17/RPS29/RPS17/RAB3GAP2/GBF1/SPCS3/RPL4/TRAM1/RPS23/RPS27A/RPL15/RPL13A/RPL8	18	hsa04022	cGMP-PKG signaling pathway	13/253	167/8111	0.00212007	0.100703	0.0900099	NPPC/PRKCE/GTF2I/ATF4/CACNA1C/CACNA1C/PPP1R12A/PPP3CA/AKT2/IRS2/ATP2B1/ADCY1/ATP1A1/ROCK2	13	R-HSA-927802	Nonsense-Mediated Decay (NMD)	16/331	115/10704	4.53713e-07	6.85754e-05	5.4582e-05	RPSA/UBA52/NCBP1/RPS27/RPL35/RPL37/RPL17/RPS29/RPS17/RPL4/SMG9/RPS23/RPS27A/RPL15/RPL13A/RPL8	16
CCND1	AT8_down	GO:0006613	cotranslational protein targeting to membrane	15/521	109/18866	3.16691e-07	0.000191442	0.000168163	RPSA/UBA52/RPS27/RPL35/RPL37/RPL17/RPS29/RPS17/RPL4/TRAM1/RPS23/RPS27A/RPL15/RPL13A/RPL8	15	hsa04213	Longevity regulating pathway - multiple species	7/253	62/8111	0.00300817	0.112798	0.100821	CRYAB/HDAC2/PRKAB2/AKT2/IRS2/RPS6KB1/ADCY1	7	R-HSA-975957	Nonsense Mediated Decay (NMD) enhanced by the Exon Junction Complex (EJC)	16/331	115/10704	4.53713e-07	6.85754e-05	5.4582e-05	RPSA/UBA52/NCBP1/RPS27/RPL35/RPL37/RPL17/RPS29/RPS17/RPL4/SMG9/RPS23/RPS27A/RPL15/RPL13A/RPL8	16
CST3	AT8_down	GO:0090150	establishment of protein localization to membrane	28/521	342/18866	3.29646e-07	0.000191442	0.000168163	RPSA/ZDHHC19/UBA52/OXA1L/PRNP/RPS27/NACAD/RPL35/RPL37/MAL/RPL17/PEX16/RPS29/RPS17/RAB3GAP2/BCS1L/BAG6/RAB26/EXOC4/RPL4/AKT2/TRAM1/CD24/RPS23/RPS27A/RPL15/RPL13A/RPL8	28	hsa04666	Fc gamma R-mediated phagocytosis	9/253	97/8111	0.00316627	0.112798	0.100821	WASF3/PRKCE/WASF2/BIN1/AKT2/GAB2/RPS6KB1/MARCKS/MARCKSL1	9	R-HSA-192823	Viral mRNA Translation	14/331	89/10704	5.20966e-07	6.88978e-05	5.48386e-05	RPSA/UBA52/RPS27/RPL35/RPL37/RPL17/RPS29/RPS17/RPL4/RPS23/RPS27A/RPL15/RPL13A/RPL8	14
PDCD6	AT8_down	GO:0006612	protein targeting to membrane	21/521	210/18866	3.95966e-07	0.000204406	0.000179551	RPSA/ZDHHC19/UBA52/PRNP/RPS27/NACAD/RPL35/RPL37/RPL17/PEX16/RPS29/RPS17/EXOC4/RPL4/AKT2/TRAM1/RPS23/RPS27A/RPL15/RPL13A/RPL8	21	hsa05131	Shigellosis	16/253	246/8111	0.00428547	0.124742	0.111496	SRC/UBA52/PRKCE/MAPK14/RIPK1/WASF2/SEPTIN7/AKT2/ACTG1/ARHGEF2/RPS6KB1/RELA/PIK3R4/PFN1/RPS27A/ROCK2	16	R-HSA-2408557	Selenocysteine synthesis	14/331	93/10704	9.05318e-07	9.57826e-05	7.62373e-05	RPSA/UBA52/RPS27/RPL35/RPL37/RPL17/RPS29/RPS17/RPL4/RPS23/RPS27A/RPL15/RPL13A/RPL8	14
CNPY3	AT8_down	GO:0007409	axonogenesis	34/521	482/18866	6.20033e-07	0.000288067	0.000253039	DLX5/BMP7/SRC/NDN/NR4A2/SEMA3E/FOXD1/VLDLR/C12orf57/SPP1/LRP1/CNP/HDAC6/SPG11/TBR1/KIF5B/LMTK2/TIAM2/APP/DPYSL2/STMN1/EPHB6/IRS2/GAB2/NPTX1/FN1/TRAK2/AFG3L2/STXBP1/ADCY1/S100B/TUBB2B/CNTN2/APOE	34	hsa04919	Thyroid hormone signaling pathway	10/253	121/8111	0.00442766	0.124742	0.111496	CCND1/PFKL/SRC/HDAC2/THRA/RCAN2/AKT2/ACTG1/RCAN1/ATP1A1	10	R-HSA-72764	Eukaryotic Translation Termination	14/331	93/10704	9.05318e-07	9.57826e-05	7.62373e-05	RPSA/UBA52/RPS27/RPL35/RPL37/RPL17/RPS29/RPS17/RPL4/RPS23/RPS27A/RPL15/RPL13A/RPL8	14
ZBTB14	AT8_down	GO:0042552	myelination	16/521	137/18866	1.24075e-06	0.000511193	0.000449033	WASF3/MBP/MAL/ID4/PLP1/NKX6-2/GALC/AKT2/TSC1/UGT8/MYRF/AFG3L2/S100B/QKI/CD9/CNTN2	16	hsa05205	Proteoglycans in cancer	14/253	205/8111	0.00481461	0.124742	0.111496	CCND1/SRC/DDX5/MAPK14/RDX/PPP1R12B/PPP1R12A/AKT2/ACTG1/CAMK2A/FN1/RPS6KB1/ERBB3/ROCK2	14	R-HSA-72689	Formation of a pool of free 40S subunits	14/331	101/10704	2.5042e-06	0.000240859	0.000191709	RPSA/UBA52/RPS27/RPL35/RPL37/RPL17/RPS29/RPS17/RPL4/RPS23/RPS27A/RPL15/RPL13A/RPL8	14
CACFD1	AT8_down	GO:0007272	ensheathment of neurons	16/521	139/18866	1.5076e-06	0.000511193	0.000449033	WASF3/MBP/MAL/ID4/PLP1/NKX6-2/GALC/AKT2/TSC1/UGT8/MYRF/AFG3L2/S100B/QKI/CD9/CNTN2	16	hsa04727	GABAergic synapse	8/253	89/8111	0.00641127	0.140815	0.125862	SRC/GAD1/SLC38A3/CACNA1C/CACNA1C/CACNA1B/TRAK2/ADCY1/GABRG1	8	R-HSA-9613829	Chaperone Mediated Autophagy	7/331	22/10704	2.89997e-06	0.00025568	0.000203506	UBA52/ARL13B/GFAP/EEF1A1/LAMP2/HDAC6/RPS27A	7
AC017050.1	AT8_down	GO:0008366	axon ensheathment	16/521	139/18866	1.5076e-06	0.000511193	0.000449033	WASF3/MBP/MAL/ID4/PLP1/NKX6-2/GALC/AKT2/TSC1/UGT8/MYRF/AFG3L2/S100B/QKI/CD9/CNTN2	16	hsa04931	Insulin resistance	9/253	108/8111	0.00644925	0.140815	0.125862	PRKCE/GFPT1/CPT1A/PPP1R3E/PRKAB2/AKT2/IRS2/RPS6KB1/RELA	9	R-HSA-168273	Influenza Viral RNA Transcription and Replication	16/331	135/10704	3.98791e-06	0.000324554	0.000258326	RPSA/POLR2F/UBA52/RPS27/RPL35/RPL37/RPL17/RPS29/RPS17/RPL4/IPO5/RPS23/RPS27A/RPL15/RPL13A/RPL8	16
PER3	AT8_down	GO:0042063	gliogenesis	25/521	307/18866	1.55468e-06	0.000511193	0.000449033	WASF3/CSPG5/SOX9/KLF15/NDN/HDAC2/TSPO/BIN1/ID4/LRP1/CNP/PLP1/CERS2/APP/NKX6-2/AKT2/RELA/MYRF/ERBB3/S100B/CD9/SUN2/GSTP1/CNTN2/S100A8	25	hsa05022	Pathways of neurodegeneration - multiple diseases	25/253	475/8111	0.00691722	0.140815	0.125862	UBA52/DNAH7/ATP5F1A/MAPK14/TUBA1B/PRNP/ATF4/NDUFA5/SPG11/KIF5B/CACNA1C/CACNA1C/APP/PPP3CA/PSMD8/CSNK2A2/CAMK2A/CACNA1B/RELA/PIK3R4/PSMD1/UBE2L3/PSMB2/RPS27A/TUBB2B/PDYN	25	R-HSA-9010553	Regulation of expression of SLITs and ROBOs	18/331	171/10704	5.52844e-06	0.000417792	0.000332537	RPSA/UBA52/NCBP1/RPS27/RPL35/RPL37/RPL17/RPS29/RPS17/RPL4/PSMD8/PSMD1/PSMB2/RPS23/RPS27A/RPL15/RPL13A/RPL8	18
SRRT	AT8_down	GO:0006413	translational initiation	19/521	192/18866	1.65218e-06	0.000511193	0.000449033	RPSA/UBA52/NCBP1/RPS27/RPL35/RPL37/RPL17/RPS29/RPS17/ABCE1/ATF4/DDX3X/RPL4/RPS6KB1/RPS23/RPS27A/RPL15/RPL13A/RPL8	19	hsa05010	Alzheimer disease	20/253	369/8111	0.0112036	0.212869	0.190265	ATP5F1A/TUBA1B/ATF4/LRP1/NDUFA5/KIF5B/CACNA1C/CACNA1C/APP/PPP3CA/AKT2/PSMD8/CSNK2A2/IRS2/RELA/PIK3R4/PSMD1/APH1B/PSMB2/TUBB2B/APOE	20	R-HSA-168255	Influenza Infection	17/331	156/10704	6.32424e-06	0.00044607	0.000355045	RPSA/POLR2F/UBA52/RPS27/RPL35/RPL37/RPL17/RPS29/RPS17/CANX/RPL4/IPO5/RPS23/RPS27A/RPL15/RPL13A/RPL8	17
KIZ	AT8_down	GO:0010001	glial cell differentiation	21/521	230/18866	1.76046e-06	0.000511193	0.000449033	WASF3/CSPG5/SOX9/KLF15/HDAC2/BIN1/ID4/LRP1/CNP/PLP1/APP/NKX6-2/AKT2/RELA/MYRF/ERBB3/S100B/CD9/GSTP1/CNTN2/S100A8	21	hsa05221	Acute myeloid leukemia	6/253	67/8111	0.0177031	0.250634	0.22402	CCND1/DUSP6/PIM2/AKT2/RPS6KB1/RELA	6	R-HSA-156827	L13a-mediated translational silencing of Ceruloplasmin expression	14/331	111/10704	7.76385e-06	0.000513385	0.000408624	RPSA/UBA52/RPS27/RPL35/RPL37/RPL17/RPS29/RPS17/RPL4/RPS23/RPS27A/RPL15/RPL13A/RPL8	14
KLHL35	AT8_down	GO:0150115	cell-substrate junction organization	13/521	102/18866	4.64532e-06	0.00126954	0.00111517	SRC/LRP1/TEK/ACTN2/MAPRE2/ACTG1/TSC1/FN1/PTPRK/FAM107A/ROCK2/GPM6B/MAP4K4	13	hsa04922	Glucagon signaling pathway	8/253	107/8111	0.0183823	0.250634	0.22402	PFKL/CPT1A/PGAM2/ATF4/PPP3CA/PRKAB2/AKT2/CAMK2A	8	R-HSA-72706	GTP hydrolysis and joining of the 60S ribosomal subunit	14/331	112/10704	8.62892e-06	0.000537024	0.000427439	RPSA/UBA52/RPS27/RPL35/RPL37/RPL17/RPS29/RPS17/RPL4/RPS23/RPS27A/RPL15/RPL13A/RPL8	14
GATD1	AT8_down	GO:0019080	viral gene expression	18/521	195/18866	8.23702e-06	0.00212607	0.00186754	RPSA/POLR2F/UBA52/RPS27/RPL35/RPL37/RPL17/RPS29/RPS17/RRP1B/SPCS3/RPL4/NUCKS1/RPS23/RPS27A/RPL15/RPL13A/RPL8	18	hsa04261	Adrenergic signaling in cardiomyocytes	10/253	150/8111	0.0187353	0.250634	0.22402	TNNT2/MAPK14/ATF4/CACNA1C/CACNA1C/AKT2/CAMK2A/CACNG8/ATP2B1/ADCY1/ATP1A1	10	R-HSA-1236394	Signaling by ERBB4	10/331	58/10704	9.72826e-06	0.000571805	0.000455123	SRC/UBA52/GFAP/STMN1/APH1B/ERBB3/S100B/RPS27A/APOE/ADAP1	10
RPSA	AT8_down	GO:0019083	viral transcription	17/521	178/18866	9.32286e-06	0.00227969	0.00200248	RPSA/POLR2F/UBA52/RPS27/RPL35/RPL37/RPL17/RPS29/RPS17/RRP1B/RPL4/NUCKS1/RPS23/RPS27A/RPL15/RPL13A/RPL8	17	hsa04137	Mitophagy - animal	6/253	68/8111	0.0189262	0.250634	0.22402	SRC/UBA52/ATF4/CSNK2A2/RELA/RPS27A	6	R-HSA-376176	Signaling by ROBO receptors	20/331	218/10704	1.35366e-05	0.000753775	0.00059996	RPSA/SRC/UBA52/NCBP1/RPS27/RPL35/RPL37/RPL17/RPS29/RPS17/RPL4/PSMD8/PSMD1/PSMB2/RPS23/PFN1/RPS27A/RPL15/RPL13A/RPL8	20
ZDHHC19	AT8_down	GO:0050804	modulation of chemical synaptic transmission	30/521	454/18866	1.03917e-05	0.00239896	0.00210725	CSPG5/SRC/NLGN1/PRKCE/F2R/PRNP/STX4/ATF4/DGKB/KIF5B/RAB26/APP/NAPB/MCTP1/SLC12A2/PPP3CA/CLSTN2/NPTXR/NPTX1/CAMK2A/CACNG8/CACNA1B/STXBP1/FAM107A/ADCY1/S100B/TUBB2B/NISCH/CNTN2/APOE	30	hsa05014	Amyotrophic lateral sclerosis	19/253	364/8111	0.0190431	0.250634	0.22402	DNAH7/ATP5F1A/NCBP1/MAPK14/TUBA1B/ATF4/NDUFA5/HDAC6/SPG11/KIF5B/PPP3CA/PSMD8/ACTG1/PIK3R4/PSMD1/PSMB2/PFN1/TUBB2B/HNRNPA3	19	R-HSA-2408522	Selenoamino acid metabolism	14/331	118/10704	1.58521e-05	0.000803706	0.000639702	RPSA/UBA52/RPS27/RPL35/RPL37/RPL17/RPS29/RPS17/RPL4/RPS23/RPS27A/RPL15/RPL13A/RPL8	14
AP000880.1	AT8_down	GO:0099177	regulation of trans-synaptic signaling	30/521	455/18866	1.08433e-05	0.00239896	0.00210725	CSPG5/SRC/NLGN1/PRKCE/F2R/PRNP/STX4/ATF4/DGKB/KIF5B/RAB26/APP/NAPB/MCTP1/SLC12A2/PPP3CA/CLSTN2/NPTXR/NPTX1/CAMK2A/CACNG8/CACNA1B/STXBP1/FAM107A/ADCY1/S100B/TUBB2B/NISCH/CNTN2/APOE	30	hsa04920	Adipocytokine signaling pathway	6/253	69/8111	0.0202059	0.250634	0.22402	POMC/CPT1A/PRKAB2/AKT2/IRS2/RELA	6	R-HSA-9612973	Autophagy	16/331	151/10704	1.69264e-05	0.000803706	0.000639702	SRC/UBA52/ARL13B/TUBA1B/GFAP/EEF1A1/LAMP2/HDAC6/MVB12A/TOMM20/PRKAB2/CSNK2A2/TSC1/PIK3R4/RPS27A/TUBB2B	16
SMARCC1	AT8_down	GO:0150116	regulation of cell-substrate junction organization	10/521	66/18866	1.24575e-05	0.00252711	0.00221982	SRC/LRP1/TEK/MAPRE2/ACTG1/TSC1/FAM107A/ROCK2/GPM6B/MAP4K4	10	hsa05031	Amphetamine addiction	6/253	69/8111	0.0202059	0.250634	0.22402	HDAC2/ATF4/CACNA1C/CACNA1C/PPP3CA/CAMK2A/PDYN	6	R-HSA-72613	Eukaryotic Translation Initiation	14/331	119/10704	1.74719e-05	0.000803706	0.000639702	RPSA/UBA52/RPS27/RPL35/RPL37/RPL17/RPS29/RPS17/RPL4/RPS23/RPS27A/RPL15/RPL13A/RPL8	14
TMEM150A	AT8_down	GO:0010952	positive regulation of peptidase activity	18/521	201/18866	1.25104e-05	0.00252711	0.00221982	PDCD6/PCOLCE2/SFRP2/MAPK14/RIPK1/CARD8/F2R/MBP/HMGB1/DDX3X/PRR7/ARL6IP5/APP/ASPH/FN1/AKIRIN2/ROCK2/S100A8	18	hsa05130	Pathogenic Escherichia coli infection	12/253	197/8111	0.0202321	0.250634	0.22402	WASF3/SRC/MAPK14/RIPK1/F2R/TUBA1B/WASF2/ACTG1/ARHGEF2/RELA/TUBB2B/ROCK2	12	R-HSA-72737	Cap-dependent Translation Initiation	14/331	119/10704	1.74719e-05	0.000803706	0.000639702	RPSA/UBA52/RPS27/RPL35/RPL37/RPL17/RPS29/RPS17/RPL4/RPS23/RPS27A/RPL15/RPL13A/RPL8	14
CDC42EP3	AT8_down	GO:0048041	focal adhesion assembly	11/521	83/18866	1.71715e-05	0.00332411	0.0029199	SRC/LRP1/TEK/ACTN2/ACTG1/TSC1/PTPRK/FAM107A/ROCK2/GPM6B/MAP4K4	11	hsa04010	MAPK signaling pathway	16/253	294/8111	0.0214002	0.250634	0.22402	IL1RAP/PGF/DUSP6/MAPK14/DUSP2/ATF4/TEK/CACNA1C/CACNA1C/PPP3CA/STMN1/AKT2/CACNG8/CACNA1B/RELA/ERBB3/MAP4K4	16	R-HSA-1251985	Nuclear signaling by ERBB4	7/331	32/10704	4.38383e-05	0.00193254	0.00153819	SRC/GFAP/STMN1/APH1B/S100B/APOE/ADAP1	7
C1orf162	AT8_down	GO:0007044	cell-substrate junction assembly	12/521	99/18866	1.80826e-05	0.00336047	0.00295184	SRC/LRP1/TEK/ACTN2/ACTG1/TSC1/FN1/PTPRK/FAM107A/ROCK2/GPM6B/MAP4K4	12	hsa04150	mTOR signaling pathway	10/253	155/8111	0.0229753	0.250634	0.22402	WDR59/FLCN/NPRL2/ATP6V1B2/AKT2/DEPDC5/TSC1/RPS6KB1/MAPKAP1/ATP6V1E1	10	R-HSA-9663891	Selective autophagy	10/331	81/10704	0.000186616	0.0078976	0.00628602	SRC/UBA52/ARL13B/TUBA1B/HDAC6/TOMM20/PRKAB2/CSNK2A2/RPS27A/TUBB2B	10
DLX5	AT8_down	GO:0000956	nuclear-transcribed mRNA catabolic process	18/521	210/18866	2.26696e-05	0.00391083	0.00343528	RPSA/UBA52/DDX5/NCBP1/PATL1/RPS27/RPL35/RPL37/RPL17/RPS29/RPS17/RPL4/SMG9/RPS23/RPS27A/RPL15/RPL13A/RPL8	18	hsa05020	Prion disease	15/253	273/8111	0.0236003	0.250634	0.22402	ATP5F1A/MAPK14/TUBA1B/PRNP/ATF4/NDUFA5/KIF5B/CACNA1C/CACNA1C/PPP3CA/PSMD8/CSNK2A2/CACNA1B/PSMD1/PSMB2/TUBB2B	15	R-HSA-9006925	Intracellular signaling by second messengers	22/331	306/10704	0.000206276	0.00839383	0.00668099	SRC/IL1RAP/UBA52/KL/PRKCE/TNKS2/HDAC2/PDE1C/PHC1/KDM1A/AKT2/PSMD8/CSNK2A2/IRS2/CAMK2A/MAPKAP1/PSMD1/PSMB2/ERBB3/ADCY1/RPS27A/ATN1	22
STK35	AT8_down	GO:0031667	response to nutrient levels	30/521	473/18866	2.27276e-05	0.00391083	0.00343528	CCND1/CST3/BMP7/SRC/DSC2/SFRP2/XPR1/POMC/SPP1/LAMP2/WDR59/TSPO/ATF4/SLC38A3/FLCN/SRSF2/ERCC1/NPRL2/SREBF2/DEPDC5/TSC1/FES/RPS6KB1/RELA/PIK3R4/ATP2B1/FAM107A/HMGCS1/GSTP1/APOE	30	hsa05132	Salmonella infection	14/253	249/8111	0.0237442	0.250634	0.22402	WASF3/MAPK14/HSP90B1/RIPK1/TUBA1B/KIF5B/EXOC4/AKT2/ACTG1/RELA/PFN1/AHNAK/TUBB2B/ROCK2	14	R-HSA-8878166	Transcriptional regulation by RUNX2	12/331	121/10704	0.00035695	0.0139872	0.011133	CCND1/DLX5/SRC/UBA52/SOX9/RBM14/HDAC6/AKT2/PSMD8/PSMD1/PSMB2/RPS27A	12
CSPG5	AT8_down	GO:0051017	actin filament bundle assembly	15/521	157/18866	3.08595e-05	0.00512047	0.00449783	SRC/HSP90B1/WASF2/RDX/ELN/SHROOM1/CORO1B/STMN1/ACTG1/TSC1/ARHGEF18/FAM107A/MARCKS/PFN1/ROCK2	15	hsa04371	Apelin signaling pathway	9/253	137/8111	0.0272623	0.273937	0.244849	CCND1/PRKCE/SPP1/TFAM/PRKAB2/AKT2/RPS6KB1/PIK3R4/ADCY1	9	R-HSA-445989	TAK1 activates NFkB by phosphorylation and activation of IKKs complex	6/331	33/10704	0.000456601	0.017253	0.0137324	UBA52/HMGB1/APP/RELA/S100B/RPS27A	6
SLC15A4	AT8_down	GO:0021782	glial cell development	13/521	122/18866	3.30391e-05	0.00529309	0.00464946	WASF3/CSPG5/ID4/LRP1/PLP1/APP/NKX6-2/AKT2/MYRF/CD9/GSTP1/CNTN2/S100A8	13	hsa05418	Fluid shear stress and atherosclerosis	9/253	139/8111	0.0295739	0.273937	0.244849	SRC/NPPC/MAPK14/HSP90B1/AKT2/ACTG1/ARHGEF2/RELA/GSTP1	9	R-HSA-1358803	Downregulation of ERBB2:ERBB3 signaling	4/331	13/10704	0.000514532	0.0187716	0.014941	UBA52/AKT2/ERBB3/RPS27A	4
BMP7	AT8_down	GO:0007265	Ras protein signal transduction	24/521	346/18866	3.67844e-05	0.00569668	0.00500398	CDC42EP3/CCDC125/MAPK14/GPR4/F2R/RHOU/WASF2/G3BP1/RDX/FLCN/GBF1/HACE1/HEG1/STMN1/MAPRE2/IRS2/ARHGEF2/ARHGEF18/MAPKAP1/PSD3/ROCK2/NISCH/MAP4K4/APOE	24	hsa04120	Ubiquitin mediated proteolysis	9/253	140/8111	0.0307797	0.273937	0.244849	UBA52/UBE3B/CDC16/UBE3C/UBE2E3/ANAPC10/UBE2L3/SMURF2/RPS27A	9	R-HSA-6791226	Major pathway of rRNA processing in the nucleolus and cytosol	15/331	184/10704	0.000582781	0.0205528	0.0163588	RPSA/UBA52/RCL1/RPS27/RPL35/RPL37/RPL17/RPS29/RPS17/RPL4/RPS23/RPS27A/RPL15/RPL13A/RPL8	15
NDUFV2-AS1	AT8_down	GO:0014003	oligodendrocyte development	8/521	47/18866	3.90523e-05	0.0058528	0.00514111	WASF3/ID4/PLP1/NKX6-2/MYRF/CD9/GSTP1/CNTN2	8	hsa04071	Sphingolipid signaling pathway	8/253	119/8111	0.0322728	0.273937	0.244849	PRKCE/MAPK14/CERS2/AKT2/GAB2/RELA/ROCK2/CERS6	8	R-HSA-72766	Translation	20/331	291/10704	0.000707724	0.0237413	0.0188966	RPSA/UBA52/OXA1L/EEF1A1/RPS27/RPL35/RPL37/RPL17/RPS29/RPS17/FARSB/MRPL14/SPCS3/RPL4/TRAM1/RPS23/RPS27A/RPL15/RPL13A/RPL8	20
PFKL	AT8_down	GO:0061572	actin filament bundle organization	15/521	161/18866	4.14179e-05	0.00601336	0.00528215	SRC/HSP90B1/WASF2/RDX/ELN/SHROOM1/CORO1B/STMN1/ACTG1/TSC1/ARHGEF18/FAM107A/MARCKS/PFN1/ROCK2	15	hsa01522	Endocrine resistance	7/253	98/8111	0.0330752	0.273937	0.244849	CCND1/SRC/MAPK14/AKT2/RPS6KB1/CARM1/ADCY1	7	R-HSA-933542	TRAF6 mediated NF-kB activation	5/331	24/10704	0.000718072	0.0237413	0.0188966	DDX58/HMGB1/APP/RELA/S100B	5
CCDC125	AT8_down	GO:0051893	regulation of focal adhesion assembly	9/521	63/18866	5.47654e-05	0.00748353	0.00657354	SRC/LRP1/TEK/ACTG1/TSC1/FAM107A/ROCK2/GPM6B/MAP4K4	9	hsa04750	Inflammatory mediator regulation of TRP channels	7/253	98/8111	0.0330752	0.273937	0.244849	SRC/IL1RAP/PRKCE/MAPK14/ASIC2/CAMK2A/ADCY1	7	R-HSA-8878159	Transcriptional regulation by RUNX3	10/331	96/10704	0.000744692	0.0238753	0.0190033	CCND1/SRC/UBA52/ZFHX3/SPP1/PSMD8/PSMD1/PSMB2/SMURF2/RPS27A	10
GLIPR2	AT8_down	GO:0090109	regulation of cell-substrate junction assembly	9/521	63/18866	5.47654e-05	0.00748353	0.00657354	SRC/LRP1/TEK/ACTG1/TSC1/FAM107A/ROCK2/GPM6B/MAP4K4	9	hsa04152	AMPK signaling pathway	8/253	120/8111	0.0336846	0.273937	0.244849	CCND1/PFKL/CPT1A/PRKAB2/AKT2/IRS2/TSC1/RPS6KB1	8	R-HSA-5663202	Diseases of signal transduction by growth factor receptors and second messengers	24/331	387/10704	0.000932145	0.02863	0.0227878	SRC/POLR2F/UBA52/KL/DUSP6/NCBP1/PORCN/TNKS2/HDAC2/HDAC6/AKT2/PSMD8/ACTG1/IRS2/GAB2/CAMK2A/FN1/MAPKAP1/PSMD1/APH1B/PSMB2/ERBB3/QKI/RPS27A	24
ACKR3	AT8_down	GO:0032970	regulation of actin filament-based process	26/521	405/18866	6.49874e-05	0.00862661	0.00757763	WASF3/CDC42EP3/FRMD6/PRKCE/DSC2/SEMA3E/WASF2/BIN1/LRP1/TEK/RDX/ACTN2/CACNA1C/ELN/CORO1B/STMN1/ABRACL/ACTG1/TSC1/FES/ARHGEF18/FAM107A/PFN1/ATP1A1/ROCK2/GPM6B	26	hsa04721	Synaptic vesicle cycle	6/253	78/8111	0.0344292	0.273937	0.244849	SLC1A1/ATP6V1B2/CLTB/CACNA1B/STXBP1/ATP6V1E1	6	R-HSA-8868773	rRNA processing in the nucleus and cytosol	15/331	194/10704	0.00100711	0.02863	0.0227878	RPSA/UBA52/RCL1/RPS27/RPL35/RPL37/RPL17/RPS29/RPS17/RPL4/RPS23/RPS27A/RPL15/RPL13A/RPL8	15
RNF19B	AT8_down	GO:0046578	regulation of Ras protein signal transduction	16/521	194/18866	0.000100992	0.0130336	0.0114487	CCDC125/GPR4/F2R/RDX/FLCN/GBF1/HEG1/STMN1/MAPRE2/IRS2/ARHGEF2/ARHGEF18/MAPKAP1/PSD3/MAP4K4/APOE	16	hsa05017	Spinocerebellar ataxia	9/253	143/8111	0.0346026	0.273937	0.244849	VLDLR/AKT2/PSMD8/KAT5/PIK3R4/PSMD1/AFG3L2/PSMB2/PDYN	9	R-HSA-69202	Cyclin E associated events during G1/S transition	9/331	83/10704	0.00101816	0.02863	0.0227878	CCND1/UBA52/CKS1B/RBL2/AKT2/PSMD8/PSMD1/PSMB2/RPS27A	9
SRC	AT8_down	GO:0045862	positive regulation of proteolysis	24/521	370/18866	0.000105151	0.0132036	0.0115981	PDCD6/RNF19B/SRC/PCOLCE2/SFRP2/MAPK14/RIPK1/CARD8/F2R/MBP/HDAC2/HMGB1/DDX3X/PRR7/BAG6/ARL6IP5/APP/ASPH/FN1/AKIRIN2/ROCK2/CNTN2/APOE/S100A8	24	hsa00920	Sulfur metabolism	2/253	10/8111	0.0369701	0.28477	0.254531	SQOR/ETHE1	2	R-HSA-1632852	Macroautophagy	12/331	136/10704	0.00102388	0.02863	0.0227878	SRC/UBA52/ARL13B/TUBA1B/HDAC6/TOMM20/PRKAB2/CSNK2A2/TSC1/PIK3R4/RPS27A/TUBB2B	12
CCNQ	AT8_down	GO:0048709	oligodendrocyte differentiation	11/521	103/18866	0.000129257	0.0158034	0.0138817	WASF3/SOX9/HDAC2/ID4/CNP/PLP1/NKX6-2/MYRF/CD9/GSTP1/CNTN2	11	hsa04530	Tight junction	10/253	169/8111	0.0384869	0.288652	0.258001	CCND1/SRC/PRKCE/TUBA1B/RDX/PRKAB2/ACTG1/ARHGEF2/ARHGEF18/ARHGEF18/ROCK2	10	R-HSA-168898	Toll-like Receptor Cascades	13/331	155/10704	0.0010283	0.02863	0.0227878	CNPY3/UBA52/DUSP6/MAPK14/HSP90B1/RIPK1/HMGB1/APP/RELA/PIK3R4/S100B/RPS27A/S100A8	13
P3H3	AT8_down	GO:0044070	regulation of anion transport	11/521	105/18866	0.00015367	0.0183064	0.0160804	ERFE/RIPK1/PRNP/ATF4/SLC38A3/ARL6IP5/SLC12A2/AKT2/IRS2/STXBP1/APOE	11	hsa04611	Platelet activation	8/253	124/8111	0.0397511	0.290488	0.259643	SRC/MAPK14/F2R/PPP1R12A/AKT2/ACTG1/ADCY1/ROCK2	8	R-HSA-69656	Cyclin A:Cdk2-associated events at S phase entry	9/331	85/10704	0.00120846	0.0327832	0.0260935	CCND1/UBA52/CKS1B/RBL2/AKT2/PSMD8/PSMD1/PSMB2/RPS27A	9
FAM104B	AT8_down	GO:0045665	negative regulation of neuron differentiation	17/521	225/18866	0.000180368	0.0209497	0.0184022	BMP7/SOX9/NLGN1/SEMA3E/SPP1/HDAC2/SPOCK1/ID4/LRP1/CERS2/APP/PPP3CA/TSC1/CARM1/TRAK2/CNTN2/APOE	17	hsa04024	cAMP signaling pathway	12/253	219/8111	0.0411588	0.293256	0.262117	SOX9/POMC/F2R/CACNA1C/CACNA1C/PPP1R12A/AKT2/CAMK2A/RELA/ATP2B1/ADCY1/ATP1A1/ROCK2	12	R-HSA-8948751	Regulation of PTEN stability and activity	8/331	69/10704	0.00124252	0.0328648	0.0261584	UBA52/TNKS2/AKT2/PSMD8/CSNK2A2/PSMD1/PSMB2/RPS27A	8
MAGI3	AT8_down	GO:0033173	calcineurin-NFAT signaling cascade	7/521	44/18866	0.000185841	0.021059	0.0184982	PRNP/HOMER3/CAMTA1/RCAN2/PPP3CA/RCAN1/ERBB3	7	hsa04623	Cytosolic DNA-sensing pathway	5/253	63/8111	0.0460788	0.320304	0.286292	POLR2F/RIPK1/DDX58/POLR3E/POLR3E/RELA	5	R-HSA-9020702	Interleukin-1 signaling	10/331	103/10704	0.00128774	0.0332073	0.026431	IL1RAP/UBA52/HMGB1/APP/PSMD8/RELA/PSMD1/PSMB2/S100B/RPS27A	10
TMBIM1	AT8_down	GO:0033273	response to vitamin	10/521	91/18866	0.00020508	0.0226857	0.0199272	CCND1/BMP7/SPP1/TSPO/SRSF2/FES/RELA/ATP2B1/HMGCS1/GSTP1	10	hsa05012	Parkinson disease	13/253	249/8111	0.0476611	0.323415	0.289072	UBA52/ATP5F1A/TUBA1B/ATF4/NDUFA5/KIF5B/PSMD8/CAMK2A/PSMD1/UBE2L3/PSMB2/RPS27A/TUBB2B	13	R-HSA-6807070	PTEN Regulation	12/331	140/10704	0.00131825	0.0332073	0.026431	UBA52/TNKS2/HDAC2/PHC1/KDM1A/AKT2/PSMD8/CSNK2A2/PSMD1/PSMB2/RPS27A/ATN1	12
TDRD3	AT8_down	GO:0050768	negative regulation of neurogenesis	20/521	295/18866	0.000218311	0.0235878	0.0207195	BMP7/SOX9/NLGN1/SEMA3E/SPP1/HDAC2/TSPO/SPOCK1/ID4/LRP1/CERS2/APP/PPP3CA/NKX6-2/TSC1/ARHGEF2/CARM1/TRAK2/CNTN2/APOE	20	hsa05163	Human cytomegalovirus infection	12/253	225/8111	0.0488345	0.32367	0.289301	CCND1/SRC/MAPK14/RIPK1/ATF4/PPP3CA/AKT2/TSC1/RPS6KB1/RELA/ADCY1/ROCK2	12	R-HSA-1257604	PIP3 activates AKT signaling	18/331	264/10704	0.00141574	0.0337991	0.0269021	SRC/IL1RAP/UBA52/KL/TNKS2/HDAC2/PHC1/KDM1A/AKT2/PSMD8/CSNK2A2/IRS2/MAPKAP1/PSMD1/PSMB2/ERBB3/RPS27A/ATN1	18
GMCL1	AT8_down	GO:0031668	cellular response to extracellular stimulus	18/521	253/18866	0.000248307	0.0261213	0.022945	DSC2/SFRP2/NR4A2/XPR1/LAMP2/WDR59/ATF4/SLC38A3/FLCN/NPRL2/SREBF2/DEPDC5/TSC1/FES/PIK3R4/ATP2B1/FAM107A/GSTP1	18										R-HSA-4641257	Degradation of AXIN	7/331	55/10704	0.00143758	0.0337991	0.0269021	UBA52/TNKS2/PSMD8/PSMD1/PSMB2/SMURF2/RPS27A	7
PPP4R4	AT8_down	GO:1902003	regulation of amyloid-beta formation	6/521	33/18866	0.000253004	0.0261213	0.022945	PRNP/BIN1/APP/RELA/ROCK2/APOE	6										R-HSA-8941858	Regulation of RUNX3 expression and activity	7/331	55/10704	0.00143758	0.0337991	0.0269021	SRC/UBA52/PSMD8/PSMD1/PSMB2/SMURF2/RPS27A	7
NPPC	AT8_down	GO:1902041	regulation of extrinsic apoptotic signaling pathway via death domain receptors	8/521	61/18866	0.000260811	0.0263419	0.0231387	TMBIM1/SFRP2/RIPK1/ITPRIP/MAL/STX4/DDX3X/ARHGEF2	8										R-HSA-69242	S Phase	13/331	162/10704	0.00154052	0.0354319	0.0282017	CCND1/UBA52/STAG1/CDC16/POLE4/CKS1B/ANAPC10/RBL2/AKT2/PSMD8/PSMD1/PSMB2/RPS27A	13
IL1RAP	AT8_down	GO:1902903	regulation of supramolecular fiber organization	23/521	373/18866	0.000302862	0.0293573	0.0257875	WASF3/CDC42EP3/AEBP1/PRKCE/CRYAB/WASF2/BIN1/HDAC6/RDX/ACTN2/ELN/APP/CORO1B/STMN1/ACTG1/TSC1/ARHGEF2/FES/ARHGEF18/CAMSAP2/PFN1/ROCK2/APOE	23										R-HSA-72312	rRNA processing	15/331	204/10704	0.0016677	0.037541	0.0298804	RPSA/UBA52/RCL1/RPS27/RPL35/RPL37/RPL17/RPS29/RPS17/RPL4/RPS23/RPS27A/RPL15/RPL13A/RPL8	15
POLR2F	AT8_down	GO:0001819	positive regulation of cytokine production	26/521	447/18866	0.000312312	0.0293573	0.0257875	SRC/IL1RAP/POLR2F/MNDA/IRF8/MAPK14/RIPK1/CARD8/F2R/DDX58/MBP/HDAC2/GPRC5B/ATF4/HMGB1/DDX3X/TNFRSF14/POLR3E/APP/HEG1/KPNA6/LSM14A/ARHGEF2/RELA/AKIRIN2/ROCK2	26										R-HSA-5205647	Mitophagy	5/331	29/10704	0.00176759	0.0389606	0.0310103	SRC/UBA52/TOMM20/CSNK2A2/RPS27A	5
TMEM52	AT8_down	GO:1901653	cellular response to peptide	24/521	398/18866	0.000312977	0.0293573	0.0257875	SMARCC1/SRC/KL/KLF15/ERFE/NR4A2/PRNP/LRP1/ACTN2/APP/ATP6V1B2/AKT2/IRS2/CAMK2A/TSC1/ARHGEF2/RPS6KB1/RELA/ATP2B1/NUCKS1/ADCY1/ATP6V1E1/ROCK2/GSTP1	24										R-HSA-9646399	Aggrephagy	6/331	43/10704	0.00193897	0.0414778	0.0330139	UBA52/ARL13B/TUBA1B/HDAC6/RPS27A/TUBB2B	6
FAM86B1	AT8_down	GO:0022604	regulation of cell morphogenesis	28/521	499/18866	0.00033287	0.0293573	0.0257875	WASF3/CDC42EP3/CSPG5/SRC/NLGN1/SEMA3E/SPP1/RHOU/LRP1/HECW2/TBR1/RDX/SEPTIN7/TIAM2/DPYSL2/RNF157/CORO1B/PPP3CA/FN1/FES/ARHGEF18/ERMN/TRAK2/S100B/TUBB2B/CNTN2/APOE/OBSL1	28										R-HSA-9607240	FLT3 Signaling	19/331	294/10704	0.0019602	0.0414778	0.0330139	SRC/UBA52/KL/DUSP6/DUSP2/TEK/ACTN2/AKT2/PSMD8/ACTG1/IRS2/GAB2/CAMK2A/FN1/PIK3R4/PSMD1/PSMB2/ERBB3/RPS27A	19
PGF	AT8_down	GO:0043254	regulation of protein-containing complex assembly	26/521	449/18866	0.000334397	0.0293573	0.0257875	WASF3/CDC42EP3/SRC/SLF1/PRKCE/GFAP/CRYAB/WASF2/BIN1/HMGB1/DDX3X/HDAC6/RDX/THRA/ELN/ERCC1/NAPB/CORO1B/STMN1/ARHGEF2/FES/CAMSAP2/STXBP1/PFN1/RPL13A/APOE	26										R-HSA-187577	SCF(Skp2)-mediated degradation of p27/p21	7/331	60/10704	0.00239877	0.0497627	0.0396082	CCND1/UBA52/CKS1B/PSMD8/PSMD1/PSMB2/RPS27A	7
E4F1	AT8_down	GO:1900272	negative regulation of long-term synaptic potentiation	4/521	13/18866	0.000337068	0.0293573	0.0257875	PRNP/APP/FAM107A/APOE	4										R-HSA-168164	Toll Like Receptor 3 (TLR3) Cascade	9/331	94/10704	0.00245058	0.0498598	0.0396854	UBA52/DUSP6/MAPK14/RIPK1/HMGB1/APP/RELA/S100B/RPS27A	9
AASDH	AT8_down	GO:0006402	mRNA catabolic process	23/521	376/18866	0.000339242	0.0293573	0.0257875	RPSA/UBA52/DDX5/NCBP1/PATL1/MAPK14/RPS27/RPL35/RPL37/RPL17/RPS29/RPS17/RPL4/PSMD8/SMG9/PSMD1/PSMB2/RPS23/RPS27A/RPL15/ROCK2/RPL13A/RPL8	23										R-HSA-168928	DDX58/IFIH1-mediated induction of interferon-alpha/beta	8/331	78/10704	0.00274156	0.0547278	0.0435601	UBA52/RIPK1/DDX58/HMGB1/APP/RELA/S100B/RPS27A	8
UBA52	AT8_down	GO:0022010	central nervous system myelination	5/521	23/18866	0.000351025	0.0293573	0.0257875	ID4/PLP1/NKX6-2/MYRF/CNTN2	5										R-HSA-168138	Toll Like Receptor 9 (TLR9) Cascade	9/331	96/10704	0.00283087	0.0552276	0.0439579	UBA52/DUSP6/MAPK14/HMGB1/APP/RELA/PIK3R4/S100B/RPS27A	9
MOB4	AT8_down	GO:0032291	axon ensheathment in central nervous system	5/521	23/18866	0.000351025	0.0293573	0.0257875	ID4/PLP1/NKX6-2/MYRF/CNTN2	5										R-HSA-71291	Metabolism of amino acids and derivatives	22/331	374/10704	0.00291324	0.0552276	0.0439579	RPSA/UBA52/TSTD1/RPS27/RPL35/RPL37/QDPR/RPL17/RPS29/RPS17/SQOR/BCAT2/ETHE1/RPL4/PSMD8/PSMD1/PSMB2/RPS23/RPS27A/RPL15/RPL13A/RPL8	22
SOX9	AT8_down	GO:0070884	regulation of calcineurin-NFAT signaling cascade	6/521	35/18866	0.000353855	0.0293573	0.0257875	PRNP/HOMER3/CAMTA1/RCAN2/RCAN1/ERBB3	6										R-HSA-193704	p75 NTR receptor-mediated signalling	9/331	97/10704	0.00303775	0.0552276	0.0439579	UBA52/HDAC2/TIAM2/ARHGEF40/ARHGEF2/ARHGEF18/RELA/APH1B/RPS27A	9
SLF1	AT8_down	GO:0097720	calcineurin-mediated signaling	7/521	49/18866	0.000369888	0.0301491	0.026483	PRNP/HOMER3/CAMTA1/RCAN2/PPP3CA/RCAN1/ERBB3	7										R-HSA-437239	Recycling pathway of L1	6/331	47/10704	0.0030798	0.0552276	0.0439579	SRC/TUBA1B/RDX/DPYSL2/ACTG1/TUBB2B	6
OSER1-DT	AT8_down	GO:0007626	locomotory behavior	15/521	198/18866	0.000413778	0.0326659	0.0286938	PRKCE/NR4A2/ZFHX3/GAD1/GAA/CNP/SPG11/APP/SEZ6/TSC1/CACNA1B/APH1B/NTAN1/CNTN2/APOE	15										R-HSA-69231	Cyclin D associated events in G1	6/331	47/10704	0.0030798	0.0552276	0.0439579	CCND1/SRC/UBA52/CKS1B/RBL2/RPS27A	6
DNAH7	AT8_down	GO:0106056	regulation of calcineurin-mediated signaling	6/521	36/18866	0.000414827	0.0326659	0.0286938	PRNP/HOMER3/CAMTA1/RCAN2/RCAN1/ERBB3	6										R-HSA-69236	G1 Phase	6/331	47/10704	0.0030798	0.0552276	0.0439579	CCND1/SRC/UBA52/CKS1B/RBL2/RPS27A	6
COL20A1	AT8_down	GO:0019216	regulation of lipid metabolic process	25/521	431/18866	0.000422019	0.0326783	0.0287047	SRC/SOX9/OPA3/ERFE/PRKCE/CPT1A/TM7SF2/TSPO/TEK/CTDNEP1/GPAM/TIAM2/THRA/SAMD8/RBL2/SREBF2/PRKAB2/AKT2/IRS2/CARM1/PIK3R4/HMGCS1/ATP1A1/ACADVL/APOE	25										R-HSA-438064	Post NMDA receptor activation events	8/331	80/10704	0.00321396	0.0566728	0.0451082	SRC/TUBA1B/ACTN2/PRKAB2/CAMK1/CAMK2A/ADCY1/TUBB2B	8
RBM14	AT8_down	GO:0050808	synapse organization	25/521	433/18866	0.00045173	0.0333985	0.0293373	WASF3/IL1RAP/DOCK10/NLGN1/MAPK14/SEMA3E/F2R/PRNP/WASF2/ASIC2/HDAC6/DGKB/APP/PDZRN3/SEZ6/CLSTN2/ACTG1/CAMK1/TSC1/LRFN1/AFG3L2/PFN1/CNTN2/APOE/OBSL1	25										R-HSA-174084	Autodegradation of Cdh1 by Cdh1:APC/C	7/331	64/10704	0.00347389	0.0585633	0.0466129	UBA52/CDC16/ANAPC10/PSMD8/PSMD1/PSMB2/RPS27A	7
MNDA	AT8_down	GO:1901888	regulation of cell junction assembly	15/521	200/18866	0.000460125	0.0333985	0.0293373	SRC/IL1RAP/NLGN1/ASIC2/LRP1/TEK/APP/CLSTN2/ACTG1/TSC1/LRFN1/FAM107A/ROCK2/GPM6B/MAP4K4	15										R-HSA-166166	MyD88-independent TLR4 cascade	9/331	99/10704	0.00348723	0.0585633	0.0466129	UBA52/DUSP6/MAPK14/RIPK1/HMGB1/APP/RELA/S100B/RPS27A	9
AC016747.1	AT8_down	GO:0038166	angiotensin-activated signaling pathway	4/521	14/18866	0.000461632	0.0333985	0.0293373	SRC/ACTN2/CAMK2A/ROCK2	4										R-HSA-937061	TRIF(TICAM1)-mediated TLR4 signaling	9/331	99/10704	0.00348723	0.0585633	0.0466129	UBA52/DUSP6/MAPK14/RIPK1/HMGB1/APP/RELA/S100B/RPS27A	9
AL022345.4	AT8_down	GO:0048708	astrocyte differentiation	9/521	83/18866	0.000467263	0.0333985	0.0293373	SOX9/BIN1/ID4/LRP1/PLP1/APP/S100B/CNTN2/S100A8	9										R-HSA-9615710	Late endosomal microautophagy	5/331	35/10704	0.00415332	0.0686596	0.054649	UBA52/ARL13B/HDAC6/MVB12A/RPS27A	5
CLEC4G	AT8_down	GO:0007015	actin filament organization	25/521	434/18866	0.000467263	0.0333985	0.0293373	WASF3/CDC42EP3/SRC/PRKCE/HSP90B1/TF/WASF2/BIN1/EMP2/RDX/ACTN2/ELN/SHROOM1/CORO1B/STMN1/ACTG1/TSC1/ARHGEF2/ARHGEF18/ERMN/FAM107A/MARCKS/PFN1/ROCK2/MARCKSL1	25										R-HSA-1227986	Signaling by ERBB2	6/331	50/10704	0.00421865	0.0686667	0.0546546	SRC/UBA52/PRKCE/AKT2/ERBB3/RPS27A	6
DOCK10	AT8_down	GO:0007266	Rho protein signal transduction	12/521	140/18866	0.000514335	0.0359599	0.0315872	CDC42EP3/CCDC125/GPR4/F2R/RHOU/FLCN/HEG1/STMN1/ARHGEF2/ARHGEF18/ROCK2/APOE	12										R-HSA-72695	Formation of the ternary complex, and subsequently, the 43S complex	6/331	51/10704	0.00465962	0.0706384	0.056224	RPSA/RPS27/RPS29/RPS17/RPS23/RPS27A	6
NLGN1	AT8_down	GO:0010950	positive regulation of endopeptidase activity	14/521	181/18866	0.000518578	0.0359599	0.0315872	PDCD6/SFRP2/RIPK1/CARD8/F2R/MBP/HMGB1/DDX3X/PRR7/ARL6IP5/ASPH/AKIRIN2/ROCK2/S100A8	14										R-HSA-168142	Toll Like Receptor 10 (TLR10) Cascade	8/331	85/10704	0.00467272	0.0706384	0.056224	UBA52/DUSP6/MAPK14/HMGB1/APP/RELA/S100B/RPS27A	8
UBE3B	AT8_down	GO:1904385	cellular response to angiotensin	5/521	25/18866	0.000529563	0.0360217	0.0316415	SRC/ACTN2/CAMK2A/RELA/ROCK2	5										R-HSA-168176	Toll Like Receptor 5 (TLR5) Cascade	8/331	85/10704	0.00467272	0.0706384	0.056224	UBA52/DUSP6/MAPK14/HMGB1/APP/RELA/S100B/RPS27A	8
IRF8	AT8_down	GO:0016358	dendrite development	17/521	247/18866	0.000534976	0.0360217	0.0316415	BMP7/DOCK10/NLGN1/VLDLR/HDAC2/HDAC6/HECW2/APP/PPP3CA/SEZ6/CAMK1/CAMK2A/CARM1/CAMSAP2/TRAK2/APOE/OBSL1	17										R-HSA-975871	MyD88 cascade initiated on plasma membrane	8/331	85/10704	0.00467272	0.0706384	0.056224	UBA52/DUSP6/MAPK14/HMGB1/APP/RELA/S100B/RPS27A	8
OPA3	AT8_down	GO:0006401	RNA catabolic process	24/521	415/18866	0.000570221	0.0376513	0.0330729	RPSA/UBA52/DDX5/NCBP1/PATL1/MAPK14/RPS27/RPL35/RPL37/RPL17/RPS29/RPS17/RPL4/TRIR/PSMD8/SMG9/PSMD1/PSMB2/RPS23/RPS27A/RPL15/ROCK2/RPL13A/RPL8	24										R-HSA-9609507	Protein localization	12/331	163/10704	0.00467362	0.0706384	0.056224	UBA52/ATP5F1A/GSTK1/GFER/PRNP/PEX16/PEX6/BCS1L/BAG6/APP/TOMM20/RPS27A	12
CDR2L	AT8_down	GO:0031333	negative regulation of protein-containing complex assembly	12/521	142/18866	0.000584394	0.0376513	0.0330729	SRC/CRYAB/HMGB1/DDX3X/HDAC6/RDX/THRA/STMN1/ARHGEF2/STXBP1/PFN1/RPL13A	12										R-HSA-174154	APC/C:Cdc20 mediated degradation of Securin	7/331	68/10704	0.00488195	0.0727479	0.057903	UBA52/CDC16/ANAPC10/PSMD8/PSMD1/PSMB2/RPS27A	7
FRMD6	AT8_down	GO:0051961	negative regulation of nervous system development	20/521	319/18866	0.000596972	0.0376513	0.0330729	BMP7/SOX9/NLGN1/SEMA3E/SPP1/HDAC2/TSPO/SPOCK1/ID4/LRP1/CERS2/APP/PPP3CA/NKX6-2/TSC1/ARHGEF2/CARM1/TRAK2/CNTN2/APOE	20										R-HSA-2173795	Downregulation of SMAD2/3:SMAD4 transcriptional activity	4/331	23/10704	0.00499201	0.0733548	0.058386	UBA52/TRIM33/SMURF2/RPS27A	4
H3F3B	AT8_down	GO:0010721	negative regulation of cell development	21/521	343/18866	0.000599369	0.0376513	0.0330729	BMP7/NPPC/SOX9/NLGN1/SEMA3E/SPP1/HDAC2/TSPO/SPOCK1/ID4/LRP1/CERS2/APP/PPP3CA/NKX6-2/TSC1/ARHGEF2/CARM1/TRAK2/CNTN2/APOE	21										R-HSA-75815	Ubiquitin-dependent degradation of Cyclin D	6/331	52/10704	0.00513361	0.0744022	0.0592197	CCND1/UBA52/PSMD8/PSMD1/PSMB2/RPS27A	6
KL	AT8_down	GO:0034109	homotypic cell-cell adhesion	9/521	86/18866	0.000607801	0.0376513	0.0330729	SH2B3/DSC2/PTPRU/RDX/ACTG1/FN1/STXBP1/CSRP1/CD9	9										R-HSA-174048	APC/C:Cdc20 mediated degradation of Cyclin B	4/331	24/10704	0.00584679	0.0829885	0.0660539	UBA52/CDC16/ANAPC10/RPS27A	4
POC1B	AT8_down	GO:0035023	regulation of Rho protein signal transduction	9/521	86/18866	0.000607801	0.0376513	0.0330729	CCDC125/GPR4/F2R/FLCN/HEG1/STMN1/ARHGEF2/ARHGEF18/APOE	9										R-HSA-9679506	SARS-CoV Infections	11/331	147/10704	0.00588293	0.0829885	0.0660539	UBA52/DDX5/RIPK1/HDAC2/KDM1A/CANX/PIK3R4/BRMS1/ATP1A1/RPS27A/ROCK2	11
BACH2	AT8_down	GO:0008286	insulin receptor signaling pathway	12/521	143/18866	0.000622324	0.0380436	0.0334176	SMARCC1/SRC/KL/ERFE/ATP6V1B2/AKT2/IRS2/TSC1/RPS6KB1/RELA/NUCKS1/ATP6V1E1	12										R-HSA-194138	Signaling by VEGF	9/331	108/10704	0.0061924	0.0862047	0.0686139	WASF3/SRC/PGF/MAPK14/WASF2/AKT2/ACTG1/MAPKAP1/ROCK2	9
AC233723.1	AT8_down	GO:0034205	amyloid-beta formation	6/521	39/18866	0.0006479	0.0390928	0.0343392	PRNP/BIN1/APP/RELA/ROCK2/APOE	6										R-HSA-453279	Mitotic G1 phase and G1/S transition	11/331	149/10704	0.00649953	0.0883677	0.0703355	CCND1/SRC/UBA52/POLE4/CKS1B/RBL2/AKT2/PSMD8/PSMD1/PSMB2/RPS27A	11
ATP5F1A	AT8_down	GO:0036293	response to decreased oxygen levels	22/521	371/18866	0.00068693	0.0400532	0.0351828	CST3/BMP7/SRC/NPPC/PGF/UBA52/PRKCE/NR4A2/HSP90B1/CRYAB/ATF4/TEK/MALAT1/PSMD8/TSC1/CD24/PSMD1/PSMB2/S100B/B3GAT1/RPS27A/ROCK2	22										R-HSA-209560	NF-kB is activated and signals survival	3/331	13/10704	0.00665398	0.0883677	0.0703355	UBA52/RELA/RPS27A	3
H3F3A	AT8_down	GO:0070482	response to oxygen levels	23/521	396/18866	0.000695572	0.0400532	0.0351828	CST3/BMP7/SRC/NPPC/PGF/UBA52/PRKCE/NR4A2/HSP90B1/CRYAB/HDAC2/ATF4/TEK/MALAT1/PSMD8/TSC1/CD24/PSMD1/PSMB2/S100B/B3GAT1/RPS27A/ROCK2	23										R-HSA-879415	Advanced glycosylation endproduct receptor signaling	3/331	13/10704	0.00665398	0.0883677	0.0703355	HMGB1/APP/S100B	3
DDX5	AT8_down	GO:0051056	regulation of small GTPase mediated signal transduction	20/521	323/18866	0.000697426	0.0400532	0.0351828	CCDC125/SRC/GPR4/F2R/RHOU/RDX/FLCN/TIAM2/GBF1/HEG1/RALBP1/STMN1/MAPRE2/IRS2/ARHGEF2/ARHGEF18/MAPKAP1/PSD3/MAP4K4/APOE	20										R-HSA-1445148	Translocation of SLC2A4 (GLUT4) to the plasma membrane	7/331	72/10704	0.00668187	0.0883677	0.0703355	TUBA1B/STX4/EXOC4/PRKAB2/AKT2/ACTG1/TUBB2B	7
KLF15	AT8_down	GO:0001952	regulation of cell-matrix adhesion	11/521	125/18866	0.000698302	0.0400532	0.0351828	SRC/SEMA3E/LRP1/TEK/EMP2/ACTG1/TSC1/FAM107A/ROCK2/GPM6B/MAP4K4	11										R-HSA-9639288	Amino acids regulate mTORC1	6/331	55/10704	0.00676773	0.0883982	0.0703598	WDR59/FLCN/NPRL2/ATP6V1B2/DEPDC5/ATP6V1E1	6
AEBP1	AT8_down	GO:1902991	regulation of amyloid precursor protein catabolic process	6/521	40/18866	0.000744685	0.0421928	0.0370622	PRNP/BIN1/APP/RELA/ROCK2/APOE	6										R-HSA-975138	TRAF6 mediated induction of NFkB and MAP kinases upon TLR7/8 or 9 activation	8/331	91/10704	0.00703994	0.0902819	0.0718591	UBA52/DUSP6/MAPK14/HMGB1/APP/RELA/S100B/RPS27A	8
ERICH1	AT8_down	GO:0071496	cellular response to external stimulus	20/521	326/18866	0.000782052	0.0437761	0.0384529	SOX9/DSC2/SFRP2/NR4A2/XPR1/LAMP2/WDR59/ATF4/SLC38A3/FLCN/NPRL2/SREBF2/DEPDC5/TSC1/FES/PIK3R4/ATP2B1/FAM107A/ATP1A1/GSTP1	20										R-HSA-174184	Cdc20:Phospho-APC/C mediated degradation of Cyclin A	7/331	73/10704	0.00720013	0.0902819	0.0718591	UBA52/CDC16/ANAPC10/PSMD8/PSMD1/PSMB2/RPS27A	7
GSTK1	AT8_down	GO:1902042	negative regulation of extrinsic apoptotic signaling pathway via death domain receptors	6/521	41/18866	0.00085227	0.0471386	0.0414067	TMBIM1/SFRP2/RIPK1/ITPRIP/DDX3X/ARHGEF2	6										R-HSA-69017	CDK-mediated phosphorylation and removal of Cdc6	7/331	73/10704	0.00720013	0.0902819	0.0718591	UBA52/CDC16/ANAPC10/PSMD8/PSMD1/PSMB2/RPS27A	7
BLOC1S5	AT8_down	GO:1990776	response to angiotensin	5/521	28/18866	0.000914983	0.0500119	0.0439305	SRC/ACTN2/CAMK2A/RELA/ROCK2	5										R-HSA-69206	G1/S Transition	10/331	131/10704	0.00738524	0.0902819	0.0718591	CCND1/UBA52/POLE4/CKS1B/RBL2/AKT2/PSMD8/PSMD1/PSMB2/RPS27A	10
DUSP6	AT8_down	GO:0048016	inositol phosphate-mediated signaling	7/521	57/18866	0.000941727	0.0507335	0.0445644	PRNP/HOMER3/CAMTA1/RCAN2/PPP3CA/RCAN1/ERBB3	7										R-HSA-194315	Signaling by Rho GTPases	24/331	455/10704	0.00749806	0.0902819	0.0718591	WASF3/SRC/CENPC/MAPK14/TUBA1B/RPS27/RHOU/WASF2/KDM4C/KIF5B/TIAM2/PPP1R12B/KDM1A/PPP1R12A/RALBP1/ACTG1/ARHGEF40/ARHGEF2/ARHGEF18/PIK3R4/PFN1/TUBB2B/ROCK2/S100A8	24
AC091729.3	AT8_down	GO:0090263	positive regulation of canonical Wnt signaling pathway	12/521	150/18866	0.000950024	0.0507335	0.0445644	DLX5/SRC/SFRP2/TNKS2/GPRC5B/CTDNEP1/DDX3X/PSMD8/PSMD1/GID8/PSMB2/SMURF2	12										R-HSA-4086400	PCP/CE pathway	8/331	92/10704	0.00750927	0.0902819	0.0718591	UBA52/CLTB/PSMD8/PSMD1/PSMB2/SMURF2/PFN1/RPS27A	8
ENKD1	AT8_down	GO:0050806	positive regulation of synaptic transmission	13/521	172/18866	0.00100555	0.0530883	0.0466329	NLGN1/PRKCE/PRNP/STX4/KIF5B/APP/CLSTN2/CACNG8/STXBP1/FAM107A/ADCY1/S100B/APOE	13										R-HSA-975155	MyD88 dependent cascade initiated on endosome	8/331	92/10704	0.00750927	0.0902819	0.0718591	UBA52/DUSP6/MAPK14/HMGB1/APP/RELA/S100B/RPS27A	8
ABHD1	AT8_down	GO:0010810	regulation of cell-substrate adhesion	15/521	217/18866	0.0010669	0.0556948	0.0489224	CSPG5/SRC/PRKCE/SEMA3E/SPOCK1/LRP1/TEK/EMP2/ACTG1/TSC1/FN1/FAM107A/ROCK2/GPM6B/MAP4K4	15										R-HSA-174178	APC/C:Cdh1 mediated degradation of Cdc20 and other APC/C:Cdh1 targeted proteins in late mitosis/early G1	7/331	74/10704	0.00774759	0.0910311	0.0724553	UBA52/CDC16/ANAPC10/PSMD8/PSMD1/PSMB2/RPS27A	7
ZNF564	AT8_down	GO:0032956	regulation of actin cytoskeleton organization	21/521	360/18866	0.00110816	0.0565769	0.0496972	WASF3/CDC42EP3/PRKCE/SEMA3E/WASF2/BIN1/LRP1/TEK/RDX/ACTN2/ELN/CORO1B/STMN1/ACTG1/TSC1/FES/ARHGEF18/FAM107A/PFN1/ROCK2/GPM6B	21										R-HSA-179419	APC:Cdc20 mediated degradation of cell cycle proteins prior to satisfation of the cell cycle checkpoint	7/331	74/10704	0.00774759	0.0910311	0.0724553	UBA52/CDC16/ANAPC10/PSMD8/PSMD1/PSMB2/RPS27A	7
SH2B3	AT8_down	GO:0062197	cellular response to chemical stress	21/521	360/18866	0.00110816	0.0565769	0.0496972	CST3/BMP7/SRC/NR4A2/RIPK1/ALDH3B1/STX4/HDAC2/TSPO/ATF4/DDX3X/HDAC6/SLC1A1/ARL6IP5/EFHD1/TSC1/ARHGEF2/RELA/MAPKAP1/PTPRK/GSTP1	21										R-HSA-179409	APC-Cdc20 mediated degradation of Nek2A	4/331	26/10704	0.00783695	0.0910311	0.0724553	UBA52/CDC16/ANAPC10/RPS27A	4
TSTD1	AT8_down	GO:0010977	negative regulation of neuron projection development	12/521	154/18866	0.00119449	0.0603218	0.0529867	NLGN1/SEMA3E/SPP1/HDAC2/SPOCK1/LRP1/CERS2/PPP3CA/TSC1/CARM1/TRAK2/APOE	12										R-HSA-168181	Toll Like Receptor 7/8 (TLR7/8) Cascade	8/331	93/10704	0.00800179	0.0910311	0.0724553	UBA52/DUSP6/MAPK14/HMGB1/APP/RELA/S100B/RPS27A	8
NPIPB2	AT8_down	GO:0010634	positive regulation of epithelial cell migration	13/521	176/18866	0.001241	0.0612069	0.0537642	PDCD6/GLIPR2/SRC/SOX9/ATP5F1A/PRKCE/TEK/HMGB1/HDAC6/MAPRE2/PFN1/ROCK2/MAP4K4	13										R-HSA-442755	Activation of NMDA receptors and postsynaptic events	8/331	93/10704	0.00800179	0.0910311	0.0724553	SRC/TUBA1B/ACTN2/PRKAB2/CAMK1/CAMK2A/ADCY1/TUBB2B	8
INO80D	AT8_down	GO:0060070	canonical Wnt signaling pathway	20/521	339/18866	0.00125898	0.0612069	0.0537642	DLX5/SRC/SOX9/PTPRU/SFRP2/NR4A2/MAPK14/PORCN/TNKS2/G3BP1/GPRC5B/CTDNEP1/AMER2/DDX3X/PSMD8/PSMD1/GID8/PSMB2/SMURF2/APOE	20										R-HSA-1614558	Degradation of cysteine and homocysteine	3/331	14/10704	0.00827701	0.0912196	0.0726054	TSTD1/SQOR/ETHE1	3
TNNT2	AT8_down	GO:0050773	regulation of dendrite development	12/521	155/18866	0.00126314	0.0612069	0.0537642	BMP7/NLGN1/VLDLR/HDAC2/HECW2/PPP3CA/SEZ6/CAMK1/CARM1/CAMSAP2/APOE/OBSL1	12										R-HSA-174490	Membrane binding and targetting of GAG proteins	3/331	14/10704	0.00827701	0.0912196	0.0726054	UBA52/MVB12A/RPS27A	3
GEN1	AT8_down	GO:0031669	cellular response to nutrient levels	15/521	221/18866	0.00128128	0.0612069	0.0537642	DSC2/XPR1/LAMP2/WDR59/ATF4/SLC38A3/FLCN/NPRL2/SREBF2/DEPDC5/TSC1/FES/PIK3R4/ATP2B1/FAM107A	15										R-HSA-174495	Synthesis And Processing Of GAG, GAGPOL Polyproteins	3/331	14/10704	0.00827701	0.0912196	0.0726054	UBA52/MVB12A/RPS27A	3
ERFE	AT8_down	GO:0052547	regulation of peptidase activity	25/521	466/18866	0.0012852	0.0612069	0.0537642	CST3/PDCD6/SRC/PCOLCE2/SFRP2/MAPK14/RIPK1/CARD8/F2R/PRNP/MBP/CRYAB/BIN1/SPOCK1/LRP1/HMGB1/DDX3X/PRR7/ARL6IP5/APP/ASPH/FN1/AKIRIN2/ROCK2/S100A8	25										R-HSA-76005	Response to elevated platelet cytosolic Ca2+	10/331	134/10704	0.00861302	0.0920007	0.0732271	TOR4A/TMX3/TF/LAMP2/STX4/ACTN2/APP/FN1/PFN1/CD9	10
LINC02018	AT8_down	GO:1990000	amyloid fibril formation	4/521	18/18866	0.00129264	0.0612069	0.0537642	RIPK1/CRYAB/APP/APOE	4										R-HSA-72649	Translation initiation complex formation	6/331	58/10704	0.00874943	0.0920007	0.0732271	RPSA/RPS27/RPS29/RPS17/RPS23/RPS27A	6
AL117336.2	AT8_down	GO:0000209	protein polyubiquitination	20/521	340/18866	0.00130424	0.0612069	0.0537642	RNF19B/UBA52/UBE3B/TNKS2/CDC16/UBE3C/DDX3X/HDAC6/HECW2/UBE2E3/HACE1/ANAPC10/TMEM129/PSMD8/ANKRD39/PSMD1/UBE2L3/PSMB2/SMURF2/RPS27A	20										R-HSA-72702	Ribosomal scanning and start codon recognition	6/331	58/10704	0.00874943	0.0920007	0.0732271	RPSA/RPS27/RPS29/RPS17/RPS23/RPS27A	6
RUNDC3A-AS1	AT8_down	GO:0010038	response to metal ion	21/521	366/18866	0.00136022	0.0631547	0.0554752	CCND1/PDCD6/NLGN1/TNNT2/ARL13B/PRNP/TF/CPNE2/QDPR/PGAM2/TSPO/ATF4/ERCC1/APP/SLC12A2/PPP3CA/KCNH1/CPOX/ADCY1/MT2A/S100A8	21										R-HSA-917937	Iron uptake and transport	6/331	58/10704	0.00874943	0.0920007	0.0732271	UBA52/TF/NEDD8/ATP6V1B2/RPS27A/ATP6V1E1	6
TRANK1	AT8_down	GO:0031032	actomyosin structure organization	14/521	200/18866	0.00137293	0.0631547	0.0554752	SRC/FRMD6/TNNT2/WASF2/ACTN2/ELN/STMN1/ACTG1/TSC1/ARHGEF18/PFN1/CSRP1/ROCK2/OBSL1	14										R-HSA-176409	APC/C:Cdc20 mediated degradation of mitotic proteins	7/331	76/10704	0.00893388	0.0920007	0.0732271	UBA52/CDC16/ANAPC10/PSMD8/PSMD1/PSMB2/RPS27A	7
PRKCE	AT8_down	GO:0002221	pattern recognition receptor signaling pathway	14/521	201/18866	0.00143941	0.0655637	0.0575913	CNPY3/UBA52/PRKCE/HSP90B1/RIPK1/DDX58/HMGB1/DDX3X/PJA2/LSM14A/RELA/PIK3R4/RPS27A/S100A8	14										R-HSA-204998	Cell death signalling via NRAGE, NRIF and NADE	7/331	76/10704	0.00893388	0.0920007	0.0732271	UBA52/TIAM2/ARHGEF40/ARHGEF2/ARHGEF18/APH1B/RPS27A	7
CENPC	AT8_down	GO:0060828	regulation of canonical Wnt signaling pathway	18/521	295/18866	0.00149318	0.0673527	0.0591627	DLX5/SRC/SOX9/PTPRU/SFRP2/MAPK14/TNKS2/G3BP1/GPRC5B/CTDNEP1/AMER2/DDX3X/PSMD8/PSMD1/GID8/PSMB2/SMURF2/APOE	18										R-HSA-166058	MyD88:MAL(TIRAP) cascade initiated on plasma membrane	8/331	95/10704	0.00905913	0.0920007	0.0732271	UBA52/DUSP6/MAPK14/HMGB1/APP/RELA/S100B/RPS27A	8
NCBP1	AT8_down	GO:0031647	regulation of protein stability	18/521	296/18866	0.00155031	0.0692571	0.0608355	PER3/SRC/PRNP/CRYAB/TF/LAMP2/PEX6/HDAC6/PIM2/BAG6/ISOC2/ASPH/TSC1/NAPG/CCT4/STXBP1/FAM107A/PFN1	18										R-HSA-168188	Toll Like Receptor TLR6:TLR2 Cascade	8/331	95/10704	0.00905913	0.0920007	0.0732271	UBA52/DUSP6/MAPK14/HMGB1/APP/RELA/S100B/RPS27A	8
TMX3	AT8_down	GO:0032011	ARF protein signal transduction	4/521	19/18866	0.0016019	0.0702117	0.061674	GBF1/MAPRE2/PSD3/MAP4K4	4										R-HSA-2426168	Activation of gene expression by SREBF (SREBP)	5/331	42/10704	0.0091305	0.0920007	0.0732271	TM7SF2/GPAM/SREBF2/CARM1/HMGCS1	5
LAMTOR5-AS1	AT8_down	GO:0032012	regulation of ARF protein signal transduction	4/521	19/18866	0.0016019	0.0702117	0.061674	GBF1/MAPRE2/PSD3/MAP4K4	4										R-HSA-72662	Activation of the mRNA upon binding of the cap-binding complex and eIFs, and subsequent binding to 43S	6/331	59/10704	0.00949367	0.0937957	0.0746558	RPSA/RPS27/RPS29/RPS17/RPS23/RPS27A	6
TMEM266	AT8_down	GO:0046320	regulation of fatty acid oxidation	5/521	32/18866	0.00171218	0.0736553	0.0646989	SOX9/CPT1A/AKT2/IRS2/ACADVL	5										R-HSA-176814	Activation of APC/C and APC/C:Cdc20 mediated degradation of mitotic proteins	7/331	77/10704	0.0095746	0.0937957	0.0746558	UBA52/CDC16/ANAPC10/PSMD8/PSMD1/PSMB2/RPS27A	7
BICDL2	AT8_down	GO:1903959	regulation of anion transmembrane transport	5/521	32/18866	0.00171218	0.0736553	0.0646989	RIPK1/PRNP/ARL6IP5/AKT2/IRS2	5										R-HSA-8852276	The role of GTSE1 in G2/M progression after G2 checkpoint	7/331	77/10704	0.0095746	0.0937957	0.0746558	UBA52/TUBA1B/PSMD8/PSMD1/PSMB2/RPS27A/TUBB2B	7
DSC2	AT8_down	GO:0042551	neuron maturation	6/521	47/18866	0.0017704	0.0754612	0.0662852	NR4A2/GLDN/APP/KDM1A/SRRM4/CNTN2	6										R-HSA-1433557	Signaling by SCF-KIT	5/331	43/10704	0.0100768	0.0978092	0.0778503	SRC/SH2B3/PTPRU/GAB2/FES	5
NIPSNAP3A	AT8_down	GO:0007160	cell-matrix adhesion	15/521	230/18866	0.00189867	0.0801929	0.0704416	SRC/SEMA3E/LRP1/TEK/EMP2/SNED1/ACTN2/ACTG1/TSC1/FN1/PTPRK/FAM107A/ROCK2/GPM6B/MAP4K4	15										R-HSA-74752	Signaling by Insulin receptor	7/331	78/10704	0.0102483	0.0980031	0.0780047	KL/ATP6V1B2/AKT2/IRS2/GAB2/PIK3R4/ATP6V1E1	7
DIP2A	AT8_down	GO:0009896	positive regulation of catabolic process	24/521	454/18866	0.00193535	0.0810056	0.0711554	RNF19B/SOX9/PRKCE/CPT1A/RAB3GAP2/LRP1/HMGB1/HDAC6/HECW2/PIM2/RDX/FLCN/BAG6/NPRL2/APP/HACE1/AKT2/IRS2/KAT5/TSC1/SMURF2/RHBDD3/ROCK2/APOE	24										R-HSA-5607761	Dectin-1 mediated noncanonical NF-kB signaling	6/331	60/10704	0.010282	0.0980031	0.0780047	UBA52/PSMD8/RELA/PSMD1/PSMB2/RPS27A	6
PCOLCE2	AT8_down	GO:0051932	synaptic transmission, GABAergic	6/521	48/18866	0.00197693	0.0820073	0.0720353	NLGN1/PRKCE/KIF5B/STXBP1/GABRG1/NISCH	6										R-HSA-168179	Toll Like Receptor TLR1:TLR2 Cascade	8/331	98/10704	0.0108362	0.101458	0.0807545	UBA52/DUSP6/MAPK14/HMGB1/APP/RELA/S100B/RPS27A	8
PTPRU	AT8_down	GO:0006979	response to oxidative stress	24/521	458/18866	0.00216975	0.0863195	0.0758232	CST3/BMP7/SRC/NR4A2/RIPK1/ALDH3B1/PRNP/CRYAB/STX4/HDAC2/ATF4/HDAC6/SLC1A1/ARL6IP5/ERCC1/APP/MCTP1/TSC1/RELA/MAPKAP1/PTPRK/TRA2B/GSTP1/APOE	24										R-HSA-181438	Toll Like Receptor 2 (TLR2) Cascade	8/331	98/10704	0.0108362	0.101458	0.0807545	UBA52/DUSP6/MAPK14/HMGB1/APP/RELA/S100B/RPS27A	8
AC079140.6	AT8_down	GO:0071375	cellular response to peptide hormone stimulus	19/521	330/18866	0.00217304	0.0863195	0.0758232	SMARCC1/SRC/KL/ERFE/NR4A2/ACTN2/ATP6V1B2/AKT2/IRS2/CAMK2A/TSC1/RPS6KB1/RELA/ATP2B1/NUCKS1/ADCY1/ATP6V1E1/ROCK2/GSTP1	19										R-HSA-109704	PI3K Cascade	5/331	44/10704	0.0110882	0.102757	0.0817883	KL/AKT2/IRS2/GAB2/PIK3R4	5
GSEC	AT8_down	GO:0032000	positive regulation of fatty acid beta-oxidation	3/521	10/18866	0.00217378	0.0863195	0.0758232	CPT1A/AKT2/IRS2	3										R-HSA-373760	L1CAM interactions	9/331	119/10704	0.0114191	0.102757	0.0817883	SRC/TUBA1B/RDX/DPYSL2/ACTG1/CSNK2A2/CD24/TUBB2B/CNTN2	9
GFER	AT8_down	GO:0045654	positive regulation of megakaryocyte differentiation	3/521	10/18866	0.00217378	0.0863195	0.0758232	ZNF16/MTURN/FAXDC2	3										R-HSA-4420097	VEGFA-VEGFR2 Pathway	8/331	99/10704	0.0114823	0.102757	0.0817883	WASF3/SRC/MAPK14/WASF2/AKT2/ACTG1/MAPKAP1/ROCK2	8
NDN	AT8_down	GO:0099612	protein localization to axon	3/521	10/18866	0.00217378	0.0863195	0.0758232	MAL/UGT8/CNTN2	3										R-HSA-446652	Interleukin-1 family signaling	10/331	140/10704	0.011533	0.102757	0.0817883	IL1RAP/UBA52/HMGB1/APP/PSMD8/RELA/PSMD1/PSMB2/S100B/RPS27A	10
SFRP2	AT8_down	GO:0031345	negative regulation of cell projection organization	13/521	188/18866	0.00223789	0.0875603	0.0769131	NLGN1/SEMA3E/PRNP/SPP1/HDAC2/SPOCK1/LRP1/CERS2/PPP3CA/TSC1/CARM1/TRAK2/APOE	13										R-HSA-8863795	Downregulation of ERBB2 signaling	4/331	29/10704	0.0115802	0.102757	0.0817883	UBA52/AKT2/ERBB3/RPS27A	4
ZSCAN12	AT8_down	GO:0034394	protein localization to cell surface	7/521	66/18866	0.00224272	0.0875603	0.0769131	PTPRU/STX4/EMP2/ACTN2/GBF1/PTPRK/GPM6B	7										R-HSA-73887	Death Receptor Signalling	10/331	141/10704	0.0120847	0.102757	0.0817883	UBA52/RIPK1/HDAC2/TIAM2/ARHGEF40/ARHGEF2/ARHGEF18/RELA/APH1B/RPS27A	10
RFPL2	AT8_down	GO:0034329	cell junction assembly	23/521	434/18866	0.00230852	0.089378	0.0785098	SRC/IL1RAP/NLGN1/ASIC2/LRP1/TEK/FLCN/ACTN2/APP/HEG1/CLSTN2/ACTG1/TSC1/UGT8/FN1/LRFN1/PTPRK/FAM107A/CD9/ROCK2/GPM6B/MAP4K4/OBSL1	23										R-HSA-1295596	Spry regulation of FGF signaling	3/331	16/10704	0.0121653	0.102757	0.0817883	SRC/UBA52/RPS27A	3
NR4A2	AT8_down	GO:0042987	amyloid precursor protein catabolic process	6/521	50/18866	0.00244405	0.0931499	0.081823	PRNP/BIN1/APP/RELA/ROCK2/APOE	6										R-HSA-175474	Assembly Of The HIV Virion	3/331	16/10704	0.0121653	0.102757	0.0817883	UBA52/MVB12A/RPS27A	3
PATL1	AT8_down	GO:0032890	regulation of organic acid transport	7/521	67/18866	0.00244604	0.0931499	0.081823	ERFE/SLC38A3/ARL6IP5/SLC12A2/AKT2/IRS2/STXBP1	7										R-HSA-193639	p75NTR signals via NF-kB	3/331	16/10704	0.0121653	0.102757	0.0817883	UBA52/RELA/RPS27A	3
MAPK14	AT8_down	GO:0001666	response to hypoxia	20/521	359/18866	0.00246822	0.0932306	0.0818938	CST3/BMP7/SRC/NPPC/PGF/UBA52/PRKCE/NR4A2/HSP90B1/CRYAB/TEK/MALAT1/PSMD8/CD24/PSMD1/PSMB2/S100B/B3GAT1/RPS27A/ROCK2	20										R-HSA-205043	NRIF signals cell death from the nucleus	3/331	16/10704	0.0121653	0.102757	0.0817883	UBA52/APH1B/RPS27A	3
SEMA3E	AT8_down	GO:0048167	regulation of synaptic plasticity	13/521	191/18866	0.00256997	0.0943929	0.0829148	NLGN1/PRNP/STX4/ATF4/APP/MCTP1/CAMK2A/STXBP1/FAM107A/ADCY1/S100B/CNTN2/APOE	13										R-HSA-2173791	TGF-beta receptor signaling in EMT (epithelial to mesenchymal transition)	3/331	16/10704	0.0121653	0.102757	0.0817883	UBA52/ARHGEF18/RPS27A	3
HSPA13	AT8_down	GO:0006006	glucose metabolic process	14/521	214/18866	0.00257786	0.0943929	0.0829148	PFKL/SRC/ERFE/MAPK14/POMC/CPT1A/PGAM2/GAA/ATF4/PPP1R3E/AKT2/IRS2/BRAT1/NISCH	14										R-HSA-3229121	Glycogen storage diseases	3/331	16/10704	0.0121653	0.102757	0.0817883	UBA52/GAA/RPS27A	3
TMEM50A	AT8_down	GO:0032228	regulation of synaptic transmission, GABAergic	5/521	35/18866	0.002579	0.0943929	0.0829148	NLGN1/PRKCE/KIF5B/STXBP1/NISCH	5										R-HSA-5683057	MAPK family signaling cascades	18/331	325/10704	0.0122376	0.102757	0.0817883	CDC42EP3/SRC/UBA52/KL/DUSP6/DUSP2/TEK/ACTN2/SEPTIN7/PSMD8/ACTG1/IRS2/CAMK2A/FN1/PSMD1/PSMB2/ERBB3/RPS27A	18
SPA17	AT8_down	GO:0006112	energy reserve metabolic process	8/521	86/18866	0.00258026	0.0943929	0.0829148	KL/GFPT1/POMC/GAA/PPP1R3E/STK40/AKT2/IRS2	8										R-HSA-176408	Regulation of APC/C activators between G1/S and early anaphase	7/331	81/10704	0.0124763	0.103937	0.0827273	UBA52/CDC16/ANAPC10/PSMD8/PSMD1/PSMB2/RPS27A	7
MANBA	AT8_down	GO:0030038	contractile actin filament bundle assembly	9/521	106/18866	0.00267553	0.0963607	0.0846434	SRC/WASF2/ELN/STMN1/ACTG1/TSC1/ARHGEF18/PFN1/ROCK2	9										R-HSA-5607764	CLEC7A (Dectin-1) signaling	8/331	101/10704	0.0128591	0.105344	0.0838477	SRC/UBA52/PPP3CA/PSMD8/RELA/PSMD1/PSMB2/RPS27A	8
PORCN	AT8_down	GO:0043149	stress fiber assembly	9/521	106/18866	0.00267553	0.0963607	0.0846434	SRC/WASF2/ELN/STMN1/ACTG1/TSC1/ARHGEF18/PFN1/ROCK2	9										R-HSA-1834949	Cytosolic sensors of pathogen-associated DNA	6/331	63/10704	0.0129246	0.105344	0.0838477	POLR2F/UBA52/RIPK1/POLR3E/RELA/RPS27A	6
HSP90B1	AT8_down	GO:0050435	amyloid-beta metabolic process	6/521	51/18866	0.00270654	0.0967276	0.0849657	PRNP/BIN1/APP/RELA/ROCK2/APOE	6										R-HSA-195258	RHO GTPase Effectors	18/331	327/10704	0.0129676	0.105344	0.0838477	WASF3/SRC/CENPC/MAPK14/TUBA1B/RPS27/WASF2/KDM4C/KIF5B/PPP1R12B/KDM1A/PPP1R12A/ACTG1/PIK3R4/PFN1/TUBB2B/ROCK2/S100A8	18
AL713852.1	AT8_down	GO:0060291	long-term synaptic potentiation	8/521	87/18866	0.00277455	0.0984011	0.0864357	NLGN1/PRNP/STX4/APP/FAM107A/ADCY1/S100B/APOE	8										R-HSA-8866652	Synthesis of active ubiquitin: roles of E1 and E2 enzymes	4/331	30/10704	0.0130436	0.105344	0.0838477	UBA52/UBE2E3/UBE2L3/RPS27A	4
ARL13B	AT8_down	GO:0035024	negative regulation of Rho protein signal transduction	4/521	22/18866	0.00283147	0.0996153	0.0875022	CCDC125/FLCN/HEG1/STMN1	4										R-HSA-5673001	RAF/MAP kinase cascade	16/331	280/10704	0.0134588	0.107874	0.0858615	SRC/UBA52/KL/DUSP6/DUSP2/TEK/ACTN2/PSMD8/ACTG1/IRS2/CAMK2A/FN1/PSMD1/PSMB2/ERBB3/RPS27A	16
PILRA	AT8_down	GO:2001237	negative regulation of extrinsic apoptotic signaling pathway	9/521	107/18866	0.00285166	0.0996153	0.0875022	SRC/TMBIM1/SFRP2/RIPK1/ITPRIP/DDX3X/ARHGEF2/RELA/GSTP1	9										R-HSA-4608870	Asymmetric localization of PCP proteins	6/331	64/10704	0.0139022	0.110591	0.0880236	UBA52/PSMD8/PSMD1/PSMB2/SMURF2/RPS27A	6
NR6A1	AT8_down	GO:0007584	response to nutrient	12/521	171/18866	0.00288569	0.100052	0.0878856	CCND1/BMP7/SFRP2/SPP1/TSPO/SRSF2/ERCC1/FES/RELA/ATP2B1/HMGCS1/GSTP1	12										R-HSA-1168372	Downstream signaling events of B Cell Receptor (BCR)	7/331	83/10704	0.0141432	0.111668	0.0888813	UBA52/PPP3CA/PSMD8/RELA/PSMD1/PSMB2/RPS27A	7
ADGRA1-AS1	AT8_down	GO:0033197	response to vitamin E	3/521	11/18866	0.00292798	0.100766	0.088513	CCND1/SRSF2/HMGCS1	3										R-HSA-182971	EGFR downregulation	4/331	31/10704	0.0146197	0.114575	0.0911952	UBA52/EPN1/PTPRK/RPS27A	4
RIPK1	AT8_down	GO:1990778	protein localization to cell periphery	19/521	340/18866	0.00302552	0.103357	0.0907891	TMEM150A/TMBIM1/PRKCE/ARL13B/PRNP/MAL/STX4/LRP1/EMP2/KIF1B/KIF5B/RAB40C/RDX/ACTN2/RAB26/AKT2/CACNG8/STXBP1/ROCK2	19										R-HSA-3858494	Beta-catenin independent WNT signaling	10/331	146/10704	0.0151474	0.117838	0.0937919	UBA52/PPP3CA/CLTB/PSMD8/CAMK2A/PSMD1/PSMB2/SMURF2/PFN1/RPS27A	10
SBNO2	AT8_down	GO:0036294	cellular response to decreased oxygen levels	14/521	218/18866	0.00304956	0.103418	0.0908426	BMP7/SRC/UBA52/PRKCE/ATF4/MALAT1/PSMD8/TSC1/PSMD1/PSMB2/S100B/B3GAT1/RPS27A/ROCK2	14										R-HSA-2467813	Separation of Sister Chromatids	12/331	191/10704	0.0155518	0.1201	0.0955928	UBA52/CENPC/STAG1/TUBA1B/RPS27/CDC16/ANAPC10/PSMD8/PSMD1/PSMB2/RPS27A/TUBB2B	12
XPR1	AT8_down	GO:0008625	extrinsic apoptotic signaling pathway via death domain receptors	8/521	89/18866	0.00319724	0.10764	0.0945514	TMBIM1/SFRP2/RIPK1/ITPRIP/MAL/STX4/DDX3X/ARHGEF2	8										R-HSA-112399	IRS-mediated signalling	5/331	48/10704	0.0158236	0.121314	0.0965588	KL/AKT2/IRS2/GAB2/PIK3R4	5
FAM106A	AT8_down	GO:0031346	positive regulation of cell projection organization	21/521	394/18866	0.00328451	0.107671	0.0945783	CDC42EP3/BMP7/SRC/NLGN1/VLDLR/WASF2/LRP1/MOB2/SEPTIN7/TIAM2/KDM1A/RNF157/CORO1B/CAMK1/FN1/FES/TOX/PFN1/TUBB2B/APOE/OBSL1	21										R-HSA-5684996	MAPK1/MAPK3 signaling	16/331	286/10704	0.016164	0.122393	0.0974173	SRC/UBA52/KL/DUSP6/DUSP2/TEK/ACTN2/PSMD8/ACTG1/IRS2/CAMK2A/FN1/PSMD1/PSMB2/ERBB3/RPS27A	16
GFPT1	AT8_down	GO:0048168	regulation of neuronal synaptic plasticity	6/521	53/18866	0.00329418	0.107671	0.0945783	APP/MCTP1/CAMK2A/S100B/CNTN2/APOE	6										R-HSA-2173789	TGF-beta receptor signaling activates SMADs	4/331	32/10704	0.0163113	0.122393	0.0974173	UBA52/NEDD8/SMURF2/RPS27A	4
SYNGR2	AT8_down	GO:0043434	response to peptide hormone	23/521	447/18866	0.00333055	0.107671	0.0945783	SMARCC1/BMP7/SRC/KL/KLF15/ERFE/NR4A2/QDPR/TEK/ACTN2/ATP6V1B2/AKT2/IRS2/CAMK2A/TSC1/RPS6KB1/RELA/ATP2B1/NUCKS1/ADCY1/ATP6V1E1/ROCK2/GSTP1	23										R-HSA-389958	Cooperation of Prefoldin and TriC/CCT in actin and tubulin folding	4/331	32/10704	0.0163113	0.122393	0.0974173	TUBA1B/PFDN6/CCT4/TUBB2B	4
HCFC1R1	AT8_down	GO:0007274	neuromuscular synaptic transmission	4/521	23/18866	0.00335367	0.107671	0.0945783	KIF1B/RIMBP2/STXBP1/DTNA	4										R-HSA-76002	Platelet activation, signaling and aggregation	15/331	263/10704	0.0166764	0.124251	0.0988962	TOR4A/SRC/PRKCE/TMX3/MAPK14/F2R/TF/LAMP2/STX4/DGKB/ACTN2/APP/FN1/PFN1/CD9	15
SLC9A8	AT8_down	GO:0034063	stress granule assembly	4/521	23/18866	0.00335367	0.107671	0.0945783	G3BP1/DDX3X/LSM14A/RPS23	4										R-HSA-1169091	Activation of NF-kappaB in B cells	6/331	67/10704	0.0171427	0.125419	0.0998263	UBA52/PSMD8/RELA/PSMD1/PSMB2/RPS27A	6
MLLT10	AT8_down	GO:1902001	fatty acid transmembrane transport	4/521	23/18866	0.00335367	0.107671	0.0945783	CPT1A/PRKAB2/AKT2/IRS2	4										R-HSA-5685942	HDR through Homologous Recombination (HRR)	6/331	67/10704	0.0171427	0.125419	0.0998263	UBA52/GEN1/POLE4/RAD17/KAT5/RPS27A	6
OXA1L	AT8_down	GO:0002224	toll-like receptor signaling pathway	11/521	152/18866	0.00336037	0.107671	0.0945783	CNPY3/UBA52/PRKCE/HSP90B1/RIPK1/HMGB1/DDX3X/PJA2/PIK3R4/RPS27A/S100A8	11										R-HSA-157858	Gap junction trafficking and regulation	5/331	49/10704	0.0171888	0.125419	0.0998263	SRC/TUBA1B/CLTB/ACTG1/TUBB2B	5
GPR4	AT8_down	GO:0043112	receptor metabolic process	13/521	198/18866	0.00350358	0.111491	0.0979337	ACKR3/VLDLR/HDAC2/LRP1/HDAC6/MVB12A/LMTK2/CACNG8/AHI1/PIK3R4/CD9/CNTN2/APOE	13										R-HSA-5654726	Negative regulation of FGFR1 signaling	4/331	33/10704	0.0181207	0.131313	0.104517	SRC/UBA52/KL/RPS27A	4
DUSP2	AT8_down	GO:0048545	response to steroid hormone	19/521	346/18866	0.00365973	0.115667	0.101602	CCND1/BMP7/SRC/DDX5/PTPRU/SPP1/TSPO/HDAC6/GPAM/CARM1/RELA/DDX17/UBE2L3/ATP2B1/FAM107A/LMO3/S100B/ATP1A1/GSTP1	19										R-HSA-114608	Platelet degranulation	9/331	129/10704	0.0185496	0.131403	0.104589	TOR4A/TMX3/TF/LAMP2/ACTN2/APP/FN1/PFN1/CD9	9
ZNF286A	AT8_down	GO:0010506	regulation of autophagy	19/521	347/18866	0.00377547	0.118456	0.104052	TMEM150A/GFAP/EEF1A1/TSPO/RAB3GAP2/HMGB1/HDAC6/PIM2/FLCN/NPRL2/EXOC4/SREBF2/ATP6V1B2/PRKAB2/DEPDC5/CSNK2A2/KAT5/TSC1/ATP6V1E1	19										R-HSA-166016	Toll Like Receptor 4 (TLR4) Cascade	9/331	129/10704	0.0185496	0.131403	0.104589	UBA52/DUSP6/MAPK14/RIPK1/HMGB1/APP/RELA/S100B/RPS27A	9
CARD8	AT8_down	GO:0031340	positive regulation of vesicle fusion	3/521	12/18866	0.00382446	0.118456	0.104052	KIF5B/DOC2B/AKT2	3										R-HSA-177929	Signaling by EGFR	5/331	50/10704	0.01863	0.131403	0.104589	SRC/UBA52/EPN1/PTPRK/RPS27A	5
POMC	AT8_down	GO:1905214	regulation of RNA binding	3/521	12/18866	0.00382446	0.118456	0.104052	NCBP1/CARM1/NUCKS1	3										R-HSA-211733	Regulation of activated PAK-2p34 by proteasome mediated degradation	5/331	50/10704	0.01863	0.131403	0.104589	UBA52/PSMD8/PSMD1/PSMB2/RPS27A	5
NCKAP5	AT8_down	GO:0008347	glial cell migration	6/521	55/18866	0.00397192	0.121405	0.106642	NDN/TSPO/LRP1/CERS2/CD9/SUN2	6										R-HSA-174143	APC/C-mediated degradation of cell cycle proteins	7/331	88/10704	0.0189971	0.13223	0.105247	UBA52/CDC16/ANAPC10/PSMD8/PSMD1/PSMB2/RPS27A	7
AC098487.1	AT8_down	GO:0060350	endochondral bone morphogenesis	6/521	55/18866	0.00397192	0.121405	0.106642	DLX5/NPPC/SOX9/TEK/CSGALNACT1/CARM1	6										R-HSA-453276	Regulation of mitotic cell cycle	7/331	88/10704	0.0189971	0.13223	0.105247	UBA52/CDC16/ANAPC10/PSMD8/PSMD1/PSMB2/RPS27A	7
TMEM171	AT8_down	GO:0030111	regulation of Wnt signaling pathway	20/521	375/18866	0.00403556	0.122544	0.107643	DLX5/SRC/SOX9/PTPRU/SFRP2/MAPK14/TNKS2/G3BP1/GPRC5B/LRP1/CTDNEP1/AMER2/DDX3X/APP/PSMD8/PSMD1/GID8/PSMB2/SMURF2/APOE	20										R-HSA-5687128	MAPK6/MAPK4 signaling	7/331	89/10704	0.0200922	0.13753	0.109465	CDC42EP3/UBA52/SEPTIN7/PSMD8/PSMD1/PSMB2/RPS27A	7
F2R	AT8_down	GO:0008360	regulation of cell shape	11/521	156/18866	0.00409489	0.122741	0.107816	WASF3/CDC42EP3/SEMA3E/RHOU/RDX/SEPTIN7/FN1/FES/ARHGEF18/ERMN/S100B	11										R-HSA-3928665	EPH-ephrin mediated repulsion of cells	5/331	51/10704	0.0201485	0.13753	0.109465	SRC/CLTB/EPHB6/ACTG1/APH1B	5
LINC02062	AT8_down	GO:1902904	negative regulation of supramolecular fiber organization	11/521	156/18866	0.00409489	0.122741	0.107816	CRYAB/WASF2/HDAC6/RDX/CORO1B/STMN1/ARHGEF2/ARHGEF18/CAMSAP2/PFN1/APOE	11										R-HSA-9678108	SARS-CoV-1 Infection	5/331	51/10704	0.0201485	0.13753	0.109465	UBA52/DDX5/CANX/PIK3R4/RPS27A	5
ZNF16	AT8_down	GO:0046326	positive regulation of glucose import	5/521	39/18866	0.00417922	0.124036	0.108953	KLF15/ERFE/MAPK14/AKT2/IRS2	5										R-HSA-180534	Vpu mediated degradation of CD4	5/331	52/10704	0.0217458	0.142901	0.113741	UBA52/PSMD8/PSMD1/PSMB2/RPS27A	5
ITPRIP	AT8_down	GO:0032869	cellular response to insulin stimulus	14/521	226/18866	0.00420569	0.124036	0.108953	SMARCC1/SRC/KL/ERFE/ATP6V1B2/AKT2/IRS2/TSC1/RPS6KB1/RELA/ATP2B1/NUCKS1/ATP6V1E1/GSTP1	14										R-HSA-2428928	IRS-related events triggered by IGF1R	5/331	52/10704	0.0217458	0.142901	0.113741	KL/AKT2/IRS2/GAB2/PIK3R4	5
ALDH3B1	AT8_down	GO:0070371	ERK1 and ERK2 cascade	18/521	325/18866	0.00421818	0.124036	0.108953	GLIPR2/ACKR3/SRC/SOX9/DUSP6/F2R/TF/MTURN/LRP1/TEK/HMGB1/FLCN/APP/FN1/LMO3/GSTP1/CAMK2N1/APOE	18										R-HSA-349425	Autodegradation of the E3 ubiquitin ligase COP1	5/331	52/10704	0.0217458	0.142901	0.113741	UBA52/PSMD8/PSMD1/PSMB2/RPS27A	5
SPRYD4	AT8_down	GO:0060349	bone morphogenesis	8/521	94/18866	0.00447357	0.129451	0.11371	DLX5/NPPC/SOX9/SFRP2/TEK/CSGALNACT1/CARM1/RAB23	8										R-HSA-69601	Ubiquitin Mediated Degradation of Phosphorylated Cdc25A	5/331	52/10704	0.0217458	0.142901	0.113741	UBA52/PSMD8/PSMD1/PSMB2/RPS27A	5
Z92544.2	AT8_down	GO:0050769	positive regulation of neurogenesis	24/521	485/18866	0.00447411	0.129451	0.11371	SRRT/BMP7/NLGN1/VLDLR/HDAC2/TSPO/BIN1/GPRC5B/LRP1/MOB2/KDM4C/TIAM2/KDM1A/RNF157/NKX6-2/CAMK1/FN1/ARHGEF2/FES/RELA/TOX/TUBB2B/APOE/OBSL1	24										R-HSA-69610	p53-Independent DNA Damage Response	5/331	52/10704	0.0217458	0.142901	0.113741	UBA52/PSMD8/PSMD1/PSMB2/RPS27A	5
STAG1	AT8_down	GO:0030168	platelet activation	11/521	158/18866	0.00450729	0.129451	0.11371	SRC/SH2B3/PRKCE/F2R/DGKB/ACTG1/FN1/STXBP1/CSRP1/CD9/APOE	11										R-HSA-69613	p53-Independent G1/S DNA damage checkpoint	5/331	52/10704	0.0217458	0.142901	0.113741	UBA52/PSMD8/PSMD1/PSMB2/RPS27A	5
CEP68	AT8_down	GO:0010447	response to acidic pH	4/521	25/18866	0.0045869	0.129451	0.11371	SRC/GPR4/ASIC2/SLC38A3	4										R-HSA-69052	Switching of origins to a post-replicative state	7/331	91/10704	0.0224133	0.144997	0.115409	UBA52/CDC16/ANAPC10/PSMD8/PSMD1/PSMB2/RPS27A	7
FOXD1	AT8_down	GO:0051261	protein depolymerization	9/521	115/18866	0.0046133	0.129451	0.11371	NCKAP5/NES/HDAC6/RDX/ACTN2/ASPH/STMN1/ARHGEF2/CAMSAP2	9										R-HSA-168927	TICAM1, RIP1-mediated IKK complex recruitment	3/331	20/10704	0.022613	0.144997	0.115409	UBA52/RIPK1/RPS27A	3
RCL1	AT8_down	GO:0008344	adult locomotory behavior	7/521	75/18866	0.00462526	0.129451	0.11371	NR4A2/CNP/APP/SEZ6/TSC1/NTAN1/CNTN2	7										R-HSA-5627117	RHO GTPases Activate ROCKs	3/331	20/10704	0.022613	0.144997	0.115409	PPP1R12B/PPP1R12A/ROCK2	3
PDAP1	AT8_down	GO:1900076	regulation of cellular response to insulin stimulus	7/521	75/18866	0.00462526	0.129451	0.11371	SRC/ERFE/TSC1/RPS6KB1/RELA/ATP2B1/NUCKS1	7										R-HSA-8876384	Listeria monocytogenes entry into host cells	3/331	20/10704	0.022613	0.144997	0.115409	SRC/UBA52/RPS27A	3
PIGA	AT8_down	GO:1901983	regulation of protein acetylation	7/521	75/18866	0.00462526	0.129451	0.11371	KLF15/EID1/HDAC2/DDX3X/FLCN/KAT5/CAMK1	7										R-HSA-169911	Regulation of Apoptosis	5/331	53/10704	0.0234233	0.148394	0.118113	UBA52/PSMD8/PSMD1/PSMB2/RPS27A	5
CTDSPL2	AT8_down	GO:0032230	positive regulation of synaptic transmission, GABAergic	3/521	13/18866	0.00487068	0.133632	0.117382	NLGN1/PRKCE/KIF5B	3										R-HSA-2428924	IGF1R signaling cascade	5/331	53/10704	0.0234233	0.148394	0.118113	KL/AKT2/IRS2/GAB2/PIK3R4	5
VLDLR	AT8_down	GO:0035641	locomotory exploration behavior	3/521	13/18866	0.00487068	0.133632	0.117382	PRKCE/GAD1/APOE	3										R-HSA-6804756	Regulation of TP53 Activity through Phosphorylation	7/331	92/10704	0.0236407	0.148774	0.118415	UBA52/MAPK14/RAD17/PRKAB2/CSNK2A2/KAT5/RPS27A	7
ZFHX3	AT8_down	GO:0051481	negative regulation of cytosolic calcium ion concentration	3/521	13/18866	0.00487068	0.133632	0.117382	GTF2I/LRP1/ATP2B1	3										R-HSA-5610787	Hedgehog 'off' state	8/331	113/10704	0.0237644	0.148774	0.118415	UBA52/TUBA1B/PSMD8/PSMD1/PSMB2/ADCY1/RPS27A/TUBB2B	8
EVI2A	AT8_down	GO:0071383	cellular response to steroid hormone stimulus	13/521	206/18866	0.00488967	0.133632	0.117382	BMP7/SRC/DDX5/HDAC6/GPAM/CARM1/DDX17/UBE2L3/ATP2B1/FAM107A/LMO3/ATP1A1/GSTP1	13										R-HSA-6804757	Regulation of TP53 Degradation	4/331	36/10704	0.0242759	0.150524	0.119808	UBA52/AKT2/MAPKAP1/RPS27A	4
DDX58	AT8_down	GO:0030177	positive regulation of Wnt signaling pathway	12/521	183/18866	0.00497852	0.135264	0.118816	DLX5/SRC/SFRP2/TNKS2/GPRC5B/CTDNEP1/DDX3X/PSMD8/PSMD1/GID8/PSMB2/SMURF2	12										R-HSA-170834	Signaling by TGF-beta Receptor Complex	6/331	73/10704	0.0251079	0.150524	0.119808	UBA52/NEDD8/TRIM33/ARHGEF18/SMURF2/RPS27A	6
TUBA1B	AT8_down	GO:0032535	regulation of cellular component size	20/521	383/18866	0.00508663	0.137398	0.120691	WASF3/CDC42EP3/PRKCE/SEMA3E/SPP1/WASF2/BIN1/LRP1/RDX/ACTN2/ELN/KDM1A/DPYSL2/SLC12A2/CORO1B/TSC1/FN1/PFN1/CNTN2/APOE	20										R-HSA-8939902	Regulation of RUNX2 expression and activity	6/331	73/10704	0.0251079	0.150524	0.119808	DLX5/UBA52/PSMD8/PSMD1/PSMB2/RPS27A	6
NES	AT8_down	GO:0031109	microtubule polymerization or depolymerization	9/521	117/18866	0.00516389	0.138173	0.121371	NCKAP5/CRYAB/HDAC6/STMN1/MAPRE2/ARHGEF2/FES/CAMSAP2/TUBGCP2	9										R-HSA-180585	Vif-mediated degradation of APOBEC3G	5/331	54/10704	0.0251822	0.150524	0.119808	UBA52/PSMD8/PSMD1/PSMB2/RPS27A	5
S100A11	AT8_down	GO:1903793	positive regulation of anion transport	6/521	58/18866	0.0051748	0.138173	0.121371	ERFE/ATF4/SLC38A3/SLC12A2/STXBP1/APOE	6										R-HSA-2404192	Signaling by Type 1 Insulin-like Growth Factor 1 Receptor (IGF1R)	5/331	54/10704	0.0251822	0.150524	0.119808	KL/AKT2/IRS2/GAB2/PIK3R4	5
MCEE	AT8_down	GO:1902905	positive regulation of supramolecular fiber organization	13/521	208/18866	0.00529726	0.140635	0.123534	WASF3/CDC42EP3/PRKCE/WASF2/BIN1/ACTN2/APP/CORO1B/TSC1/FES/PFN1/ROCK2/APOE	13										R-HSA-74751	Insulin receptor signalling cascade	5/331	54/10704	0.0251822	0.150524	0.119808	KL/AKT2/IRS2/GAB2/PIK3R4	5
TMEM121	AT8_down	GO:2001236	regulation of extrinsic apoptotic signaling pathway	11/521	162/18866	0.00543083	0.143362	0.125929	SRC/TMBIM1/SFRP2/RIPK1/ITPRIP/MAL/STX4/DDX3X/ARHGEF2/RELA/GSTP1	11										R-HSA-8854050	FBXL7 down-regulates AURKA during mitotic entry and in early mitosis	5/331	54/10704	0.0251822	0.150524	0.119808	UBA52/PSMD8/PSMD1/PSMB2/RPS27A	5
C12orf57	AT8_down	GO:0009267	cellular response to starvation	11/521	163/18866	0.00568355	0.148051	0.130048	DSC2/XPR1/LAMP2/WDR59/ATF4/SLC38A3/FLCN/NPRL2/SREBF2/DEPDC5/PIK3R4	11										R-HSA-9604323	Negative regulation of NOTCH4 signaling	5/331	54/10704	0.0251822	0.150524	0.119808	UBA52/PSMD8/PSMD1/PSMB2/RPS27A	5
FRMD4B	AT8_down	GO:0007411	axon guidance	16/521	284/18866	0.00576721	0.148051	0.130048	DLX5/BMP7/SRC/SEMA3E/FOXD1/VLDLR/LRP1/TBR1/KIF5B/APP/DPYSL2/EPHB6/IRS2/GAB2/TUBB2B/CNTN2	16										R-HSA-6806003	Regulation of TP53 Expression and Degradation	4/331	37/10704	0.0265756	0.157961	0.125727	UBA52/AKT2/MAPKAP1/RPS27A	4
PRNP	AT8_down	GO:0016236	macroautophagy	17/521	310/18866	0.00587801	0.148051	0.130048	SRC/LAMP2/RAB3GAP2/HDAC6/MVB12A/PIM2/NPRL2/EXOC4/TOMM20/ATP6V1B2/PRKAB2/AUP1/CSNK2A2/TSC1/PIK3R4/ATP6V1E1/RAB23	17										R-HSA-5633007	Regulation of TP53 Activity	10/331	160/10704	0.0267805	0.157961	0.125728	UBA52/MAPK14/HDAC2/RAD17/PRKAB2/AKT2/CSNK2A2/KAT5/MAPKAP1/RPS27A	10
TXNDC16	AT8_down	GO:0034599	cellular response to oxidative stress	17/521	310/18866	0.00587801	0.148051	0.130048	CST3/BMP7/SRC/NR4A2/RIPK1/ALDH3B1/STX4/HDAC2/ATF4/HDAC6/SLC1A1/ARL6IP5/TSC1/RELA/MAPKAP1/PTPRK/GSTP1	17										R-HSA-1655829	Regulation of cholesterol biosynthesis by SREBP (SREBF)	5/331	55/10704	0.0270236	0.157961	0.125728	TM7SF2/GPAM/SREBF2/CARM1/HMGCS1	5
DDX23	AT8_down	GO:0071453	cellular response to oxygen levels	14/521	235/18866	0.00590743	0.148051	0.130048	BMP7/SRC/UBA52/PRKCE/ATF4/MALAT1/PSMD8/TSC1/PSMD1/PSMB2/S100B/B3GAT1/RPS27A/ROCK2	14										R-HSA-174113	SCF-beta-TrCP mediated degradation of Emi1	5/331	55/10704	0.0270236	0.157961	0.125728	UBA52/PSMD8/PSMD1/PSMB2/RPS27A	5
CPT1A	AT8_down	GO:0097485	neuron projection guidance	16/521	285/18866	0.00595977	0.148051	0.130048	DLX5/BMP7/SRC/SEMA3E/FOXD1/VLDLR/LRP1/TBR1/KIF5B/APP/DPYSL2/EPHB6/IRS2/GAB2/TUBB2B/CNTN2	16										R-HSA-449147	Signaling by Interleukins	22/331	461/10704	0.0287679	0.161728	0.128726	CCND1/IL1RAP/UBA52/DUSP6/NDN/MAPK14/HSP90B1/POMC/RHOU/STX4/HMGB1/APP/CANX/PSMD8/IRS2/GAB2/FN1/RELA/PSMD1/PSMB2/S100B/RPS27A	22
MBP	AT8_down	GO:0006878	cellular copper ion homeostasis	3/521	14/18866	0.00607315	0.148051	0.130048	PRNP/APP/MT2A	3										R-HSA-195721	Signaling by WNT	17/331	332/10704	0.0288883	0.161728	0.128726	UBA52/SOX9/SFRP2/PORCN/TNKS2/PPP3CA/CLTB/AKT2/PSMD8/CSNK2A2/KAT5/CAMK2A/PSMD1/PSMB2/SMURF2/PFN1/RPS27A	17
GFAP	AT8_down	GO:0033169	histone H3-K9 demethylation	3/521	14/18866	0.00607315	0.148051	0.130048	KDM4C/KDM1A/KDM4B	3										R-HSA-168643	Nucleotide-binding domain, leucine rich repeat containing receptor (NLR) signaling pathways	5/331	56/10704	0.0289487	0.161728	0.128726	UBA52/MAPK14/APP/RELA/RPS27A	5
EEF1A1	AT8_down	GO:0046321	positive regulation of fatty acid oxidation	3/521	14/18866	0.00607315	0.148051	0.130048	CPT1A/AKT2/IRS2	3										R-HSA-450408	AUF1 (hnRNP D0) binds and destabilizes mRNA	5/331	56/10704	0.0289487	0.161728	0.128726	UBA52/PSMD8/PSMD1/PSMB2/RPS27A	5
RPS27	AT8_down	GO:0098814	spontaneous synaptic transmission	3/521	14/18866	0.00607315	0.148051	0.130048	APP/DOC2B/SLC12A2	3										R-HSA-5362768	Hh mutants that don't undergo autocatalytic processing are degraded by ERAD	5/331	56/10704	0.0289487	0.161728	0.128726	UBA52/PSMD8/PSMD1/PSMB2/RPS27A	5
CRYAB	AT8_down	GO:1902430	negative regulation of amyloid-beta formation	3/521	14/18866	0.00607315	0.148051	0.130048	PRNP/BIN1/APOE	3										R-HSA-5689896	Ovarian tumor domain proteases	4/331	38/10704	0.0290015	0.161728	0.128726	UBA52/RIPK1/DDX58/RPS27A	4
LINC00320	AT8_down	GO:0051588	regulation of neurotransmitter transport	9/521	120/18866	0.00608368	0.148051	0.130048	CSPG5/NLGN1/ARL6IP5/NAPB/MCTP1/CAMK2A/STXBP1/ADCY1/GPM6B	9										R-HSA-2979096	NOTCH2 Activation and Transmission of Signal to the Nucleus	3/331	22/10704	0.0291966	0.161728	0.128726	UBA52/APH1B/RPS27A	3
SPP1	AT8_down	GO:0048668	collateral sprouting	4/521	27/18866	0.00609313	0.148051	0.130048	SPP1/LRP1/HDAC6/APP	4										R-HSA-5205685	PINK1-PRKN Mediated Mitophagy	3/331	22/10704	0.0291966	0.161728	0.128726	UBA52/TOMM20/RPS27A	3
LINC00844	AT8_down	GO:0050996	positive regulation of lipid catabolic process	4/521	27/18866	0.00609313	0.148051	0.130048	PRKCE/CPT1A/AKT2/IRS2	4										R-HSA-9609523	Insertion of tail-anchored proteins into the endoplasmic reticulum membrane	3/331	22/10704	0.0291966	0.161728	0.128726	PRNP/BAG6/APP	3
REEP3	AT8_down	GO:0006949	syncytium formation	6/521	60/18866	0.00611253	0.148051	0.130048	MAPK14/SBNO2/ERCC1/CAMK1/KCNH1/CD9	6										R-HSA-9617324	Negative regulation of NMDA receptor-mediated neuronal transmission	3/331	22/10704	0.0291966	0.161728	0.128726	ACTN2/CAMK1/CAMK2A	3
TF	AT8_down	GO:0043407	negative regulation of MAP kinase activity	7/521	79/18866	0.00615021	0.148051	0.130048	BMP7/DUSP6/SH2B3/SFRP2/DUSP2/GSTP1/APOE	7										R-HSA-112316	Neuronal System	20/331	410/10704	0.0295761	0.162977	0.12972	SRC/IL1RAP/NLGN1/TUBA1B/HOMER3/GAD1/SLC1A1/ACTN2/ARL6IP5/PRKAB2/APBA3/CAMK1/CAMK2A/CACNG8/CACNA1B/LRFN1/KCNH1/STXBP1/ADCY1/TUBB2B	20
CPNE2	AT8_down	GO:0099601	regulation of neurotransmitter receptor activity	7/521	79/18866	0.00615021	0.148051	0.130048	SRC/NLGN1/ACTN2/APP/NPTXR/NPTX1/CACNG8	7										R-HSA-983168	Antigen processing: Ubiquitination & Proteasome degradation	16/331	309/10704	0.030579	0.16763	0.133424	RNF19B/UBA52/UBE3B/CDC16/UBE3C/HECW2/UBE2E3/HACE1/ANAPC10/PJA2/PSMD8/PSMD1/UBE2L3/PSMB2/SMURF2/RPS27A	16
MTURN	AT8_down	GO:1903829	positive regulation of cellular protein localization	18/521	338/18866	0.00628416	0.150496	0.132196	SRC/PRKCE/MAPK14/CTDSPL2/PRNP/RHOU/STX4/LRP1/KIF5B/RDX/SREBF2/AKT2/CSNK2A2/CAMK1/IPO5/UBE2L3/CCT4/ROCK2	18										R-HSA-4641258	Degradation of DVL	5/331	57/10704	0.0309584	0.167969	0.133693	UBA52/PSMD8/PSMD1/PSMB2/RPS27A	5
NACAD	AT8_down	GO:0001953	negative regulation of cell-matrix adhesion	5/521	43/18866	0.00638581	0.152146	0.133645	SRC/SEMA3E/LRP1/FAM107A/MAP4K4	5										R-HSA-69541	Stabilization of p53	5/331	57/10704	0.0309584	0.167969	0.133693	UBA52/PSMD8/PSMD1/PSMB2/RPS27A	5
CUEDC1	AT8_down	GO:0035967	cellular response to topologically incorrect protein	11/521	166/18866	0.00649766	0.154021	0.135292	CCND1/HSPA13/HSP90B1/GFPT1/ATF4/HDAC6/BAG6/CANX/AUP1/ACADVL/ZBTB17	11										R-HSA-8853884	Transcriptional Regulation by VENTX	4/331	39/10704	0.0315546	0.17033	0.135573	CCND1/CDC16/ANAPC10/RELA	4
LAMP2	AT8_down	GO:0051346	negative regulation of hydrolase activity	23/521	473/18866	0.0065339	0.154094	0.135356	CST3/SRC/PPP4R4/TNNT2/SFRP2/OXA1L/CARD8/PRNP/CRYAB/BIN1/ABCE1/SPOCK1/LRP1/RRP1B/DDX3X/RDX/LMTK2/APP/CAMK2A/TSC1/RIMBP2/IPO5/ROCK2	23										R-HSA-69239	Synthesis of DNA	8/331	120/10704	0.0325026	0.173122	0.137795	UBA52/CDC16/POLE4/ANAPC10/PSMD8/PSMD1/PSMB2/RPS27A	8
SOX2-OT	AT8_down	GO:2000171	negative regulation of dendrite development	4/521	28/18866	0.00695615	0.163224	0.143376	NLGN1/HDAC2/PPP3CA/CARM1	4										R-HSA-2644602	Signaling by NOTCH1 PEST Domain Mutants in Cancer	5/331	58/10704	0.0330536	0.173122	0.137795	UBA52/HDAC2/HDAC6/APH1B/RPS27A	5
SDR39U1	AT8_down	GO:0030522	intracellular receptor signaling pathway	15/521	265/18866	0.00707942	0.165281	0.145183	SRC/UBA52/DDX5/NR4A2/NR6A1/DDX58/HDAC6/GPAM/THRA/LSM14A/CARM1/RELA/DDX17/LMO3/RPS27A	15										R-HSA-2644603	Signaling by NOTCH1 in Cancer	5/331	58/10704	0.0330536	0.173122	0.137795	UBA52/HDAC2/HDAC6/APH1B/RPS27A	5
RPL35	AT8_down	GO:0070527	platelet aggregation	6/521	62/18866	0.0071682	0.166517	0.146269	SH2B3/ACTG1/FN1/STXBP1/CSRP1/CD9	6										R-HSA-2644606	Constitutive Signaling by NOTCH1 PEST Domain Mutants	5/331	58/10704	0.0330536	0.173122	0.137795	UBA52/HDAC2/HDAC6/APH1B/RPS27A	5
TNKS2	AT8_down	GO:0034111	negative regulation of homotypic cell-cell adhesion	3/521	15/18866	0.00743748	0.16916	0.148591	SH2B3/RDX/CD9	3										R-HSA-2894858	Signaling by NOTCH1 HD+PEST Domain Mutants in Cancer	5/331	58/10704	0.0330536	0.173122	0.137795	UBA52/HDAC2/HDAC6/APH1B/RPS27A	5
RPL37	AT8_down	GO:0070885	negative regulation of calcineurin-NFAT signaling cascade	3/521	15/18866	0.00743748	0.16916	0.148591	PRNP/HOMER3/RCAN1	3										R-HSA-2894862	Constitutive Signaling by NOTCH1 HD+PEST Domain Mutants	5/331	58/10704	0.0330536	0.173122	0.137795	UBA52/HDAC2/HDAC6/APH1B/RPS27A	5
RHOU	AT8_down	GO:0106057	negative regulation of calcineurin-mediated signaling	3/521	15/18866	0.00743748	0.16916	0.148591	PRNP/HOMER3/RCAN1	3										R-HSA-6811434	COPI-dependent Golgi-to-ER retrograde traffic	7/331	99/10704	0.033545	0.17483	0.139155	TUBA1B/KIF1B/KIF5B/GBF1/NAPB/NAPG/TUBB2B	7
WSCD1	AT8_down	GO:1903960	negative regulation of anion transmembrane transport	3/521	15/18866	0.00743748	0.16916	0.148591	ARL6IP5/AKT2/IRS2	3										R-HSA-6783310	Fanconi Anemia Pathway	4/331	40/10704	0.0342356	0.177555	0.141324	UBA52/ERCC1/FAN1/RPS27A	4
GLDN	AT8_down	GO:0042493	response to drug	20/521	397/18866	0.00746517	0.16916	0.148591	CCND1/CST3/SRC/NPPC/PGF/DUSP6/SFRP2/PRNP/CPT1A/QDPR/HDAC2/TSPO/GAD1/PPP1R12A/PPP3CA/RELA/HMGCS1/ADCY1/MT2A/ATP1A1	20										R-HSA-5387390	Hh mutants abrogate ligand secretion	5/331	59/10704	0.035235	0.18009	0.143341	UBA52/PSMD8/PSMD1/PSMB2/RPS27A	5
QDPR	AT8_down	GO:0031929	TOR signaling	9/521	124/18866	0.00750044	0.16916	0.148591	PDCD6/WDR59/TBCK/FLCN/NPRL2/DEPDC5/TSC1/RPS6KB1/MAPKAP1	9										R-HSA-5676590	NIK-->noncanonical NF-kB signaling	5/331	59/10704	0.035235	0.18009	0.143341	UBA52/PSMD8/PSMD1/PSMB2/RPS27A	5
MAL	AT8_down	GO:0007568	aging	17/521	319/18866	0.00773426	0.171443	0.150596	KL/MAPK14/PRNP/CRYAB/TSPO/LITAF/LRP1/CNP/ERCC1/APP/SLC12A2/CANX/PPP3CA/CARM1/RELA/ATP2B1/SMC5	17										R-HSA-68827	CDT1 association with the CDC6:ORC:origin complex	5/331	59/10704	0.035235	0.18009	0.143341	UBA52/PSMD8/PSMD1/PSMB2/RPS27A	5
EID1	AT8_down	GO:0010828	positive regulation of glucose transmembrane transport	5/521	45/18866	0.00774924	0.171443	0.150596	KLF15/ERFE/MAPK14/AKT2/IRS2	5										R-HSA-2151209	Activation of PPARGC1A (PGC-1alpha) by phosphorylation	2/331	10/10704	0.0364092	0.180358	0.143554	MAPK14/PRKAB2	2
WASF2	AT8_down	GO:0034105	positive regulation of tissue remodeling	5/521	45/18866	0.00774924	0.171443	0.150596	TMBIM1/SPP1/TF/PPP3CA/ROCK2	5										R-HSA-381183	ATF6 (ATF6-alpha) activates chaperone genes	2/331	10/10704	0.0364092	0.180358	0.143554	HSP90B1/ATF4	2
CDC16	AT8_down	GO:0034198	cellular response to amino acid starvation	5/521	45/18866	0.00774924	0.171443	0.150596	WDR59/ATF4/FLCN/NPRL2/DEPDC5	5										R-HSA-937042	IRAK2 mediated activation of TAK1 complex	2/331	10/10704	0.0364092	0.180358	0.143554	UBA52/RPS27A	2
GTF2I	AT8_down	GO:0070979	protein K11-linked ubiquitination	4/521	29/18866	0.00789621	0.173046	0.152004	CDC16/UBE2E3/ANAPC10/UBE2L3	4										R-HSA-210500	Glutamate Neurotransmitter Release Cycle	3/331	24/10704	0.0366817	0.180358	0.143554	SLC1A1/ARL6IP5/STXBP1	3
G3BP1	AT8_down	GO:0150117	positive regulation of cell-substrate junction organization	4/521	29/18866	0.00789621	0.173046	0.152004	TEK/MAPRE2/TSC1/MAP4K4	4										R-HSA-450302	activated TAK1 mediates p38 MAPK activation	3/331	24/10704	0.0366817	0.180358	0.143554	UBA52/MAPK14/RPS27A	3
HOMER3	AT8_down	GO:0031145	anaphase-promoting complex-dependent catabolic process	7/521	83/18866	0.00802188	0.174975	0.153698	UBA52/CDC16/ANAPC10/PSMD8/PSMD1/PSMB2/RPS27A	7										R-HSA-5668599	RHO GTPases Activate NADPH Oxidases	3/331	24/10704	0.0366817	0.180358	0.143554	MAPK14/PIK3R4/S100A8	3
SEC22C	AT8_down	GO:0031644	regulation of nervous system process	10/521	148/18866	0.00810665	0.175998	0.154597	WASF3/SRC/NLGN1/F2R/APP/NPTXR/NPTX1/MYRF/S100B/ROCK2	10										R-HSA-9620244	Long-term potentiation	3/331	24/10704	0.0366817	0.180358	0.143554	SRC/ACTN2/CAMK2A	3
PTMA	AT8_down	GO:0032231	regulation of actin filament bundle assembly	8/521	104/18866	0.00816391	0.176416	0.154964	WASF2/RDX/STMN1/ACTG1/TSC1/ARHGEF18/PFN1/ROCK2	8										R-HSA-165159	MTOR signalling	4/331	41/10704	0.0370452	0.180358	0.143554	PRKAB2/AKT2/TSC1/RPS6KB1	4
CAPS	AT8_down	GO:0007019	microtubule depolymerization	5/521	46/18866	0.00850151	0.182019	0.159885	NCKAP5/HDAC6/STMN1/ARHGEF2/CAMSAP2	5										R-HSA-5696400	Dual Incision in GG-NER	4/331	41/10704	0.0370452	0.180358	0.143554	UBA52/POLE4/ERCC1/RPS27A	4
NIF3L1	AT8_down	GO:0032007	negative regulation of TOR signaling	5/521	46/18866	0.00850151	0.182019	0.159885	PDCD6/FLCN/NPRL2/DEPDC5/TSC1	5										R-HSA-9609736	Assembly and cell surface presentation of NMDA receptors	4/331	41/10704	0.0370452	0.180358	0.143554	TUBA1B/ACTN2/CAMK2A/TUBB2B	4
STX4	AT8_down	GO:0006839	mitochondrial transport	15/521	271/18866	0.00861287	0.182813	0.160583	ATP5F1A/OXA1L/CPT1A/RHOU/TSPO/CNP/BCS1L/RTL10/TOMM20/SREBF2/PRKAB2/CSNK2A2/CAMK2A/AFG3L2/UBE2L3	15										R-HSA-5610780	Degradation of GLI1 by the proteasome	5/331	60/10704	0.0375035	0.180358	0.143554	UBA52/PSMD8/PSMD1/PSMB2/RPS27A	5
HDAC2	AT8_down	GO:0009615	response to virus	18/521	349/18866	0.00861731	0.182813	0.160583	SRC/MAPK14/XPR1/DDX58/G3BP1/ABCE1/RRP1B/DDX3X/GPAM/PIM2/POLR3E/GBF1/STMN1/AUP1/ELMOD2/LSM14A/RELA/DDX17	18										R-HSA-5610783	Degradation of GLI2 by the proteasome	5/331	60/10704	0.0375035	0.180358	0.143554	UBA52/PSMD8/PSMD1/PSMB2/RPS27A	5
C12orf29	AT8_down	GO:0006470	protein dephosphorylation	17/521	323/18866	0.00869812	0.183689	0.161352	PPP4R4/DUSP6/PTPRU/HSP90B1/DUSP2/CTDSPL2/CTDNEP1/PPP1R3E/CAMTA1/LMTK2/RCAN2/PPP1R12A/PPP3CA/TSC1/RCAN1/PTPRK/ROCK2	17										R-HSA-5610785	GLI3 is processed to GLI3R by the proteasome	5/331	60/10704	0.0375035	0.180358	0.143554	UBA52/PSMD8/PSMD1/PSMB2/RPS27A	5
BHLHE22	AT8_down	GO:0007034	vacuolar transport	10/521	150/18866	0.00887162	0.184814	0.162341	TMEM50A/LAMP2/VPS53/BIN1/LRP1/MVB12A/RNF157/CACNG8/PIK3R4/TRAK2	10										R-HSA-5689603	UCH proteinases	7/331	102/10704	0.0385264	0.184057	0.146498	UBA52/INO80D/NEDD8/PSMD8/PSMD1/PSMB2/RPS27A	7
GALNT8	AT8_down	GO:0045725	positive regulation of glycogen biosynthetic process	3/521	16/18866	0.00896845	0.184814	0.162341	PPP1R3E/AKT2/IRS2	3										R-HSA-983169	Class I MHC mediated antigen processing & presentation	18/331	370/10704	0.0386206	0.184057	0.146498	RNF19B/UBA52/UBE3B/CDC16/STX4/UBE3C/HECW2/UBE2E3/HACE1/ANAPC10/CANX/PJA2/PSMD8/PSMD1/UBE2L3/PSMB2/SMURF2/RPS27A	18
WDR59	AT8_down	GO:0061684	chaperone-mediated autophagy	3/521	16/18866	0.00896845	0.184814	0.162341	GFAP/EEF1A1/LAMP2	3										R-HSA-9679191	Potential therapeutics for SARS	6/331	81/10704	0.0391059	0.185534	0.147674	RIPK1/HDAC2/KDM1A/BRMS1/ATP1A1/ROCK2	6
PGAM2	AT8_down	GO:0032388	positive regulation of intracellular transport	13/521	222/18866	0.00896989	0.184814	0.162341	MAPK14/CTDSPL2/PRNP/RHOU/KIF5B/RDX/ACTN2/SREBF2/AKT2/CSNK2A2/CAMK1/IPO5/UBE2L3	13										R-HSA-5678895	Defective CFTR causes cystic fibrosis	5/331	61/10704	0.0398595	0.186786	0.148671	UBA52/PSMD8/PSMD1/PSMB2/RPS27A	5
C7orf26	AT8_down	GO:0090181	regulation of cholesterol metabolic process	6/521	65/18866	0.00899008	0.184814	0.162341	TM7SF2/GPAM/SREBF2/HMGCS1/ACADVL/APOE	6										R-HSA-3769402	Deactivation of the beta-catenin transactivating complex	4/331	42/10704	0.0399836	0.186786	0.148671	UBA52/SOX9/AKT2/RPS27A	4
TM7SF2	AT8_down	GO:0098586	cellular response to virus	6/521	65/18866	0.00899008	0.184814	0.162341	MAPK14/DDX58/RRP1B/DDX3X/GBF1/LSM14A	6										R-HSA-3928662	EPHB-mediated forward signaling	4/331	42/10704	0.0399836	0.186786	0.148671	SRC/EPHB6/ACTG1/ROCK2	4
ZNF512B	AT8_down	GO:0010469	regulation of signaling receptor activity	11/521	174/18866	0.0091193	0.186578	0.163891	SRC/NLGN1/HMGB1/ACTN2/APP/LY6H/NPTXR/NPTX1/TAFA1/CACNG8/LY6E	11										R-HSA-389960	Formation of tubulin folding intermediates by CCT/TriC	3/331	25/10704	0.0407573	0.186786	0.148671	TUBA1B/CCT4/TUBB2B	3
TSPO	AT8_down	GO:0014013	regulation of gliogenesis	9/521	128/18866	0.00915624	0.186578	0.163891	HDAC2/TSPO/BIN1/ID4/LRP1/CERS2/NKX6-2/RELA/CNTN2	9										R-HSA-5696397	Gap-filling DNA repair synthesis and ligation in GG-NER	3/331	25/10704	0.0407573	0.186786	0.148671	UBA52/POLE4/RPS27A	3
RPL17	AT8_down	GO:2001056	positive regulation of cysteine-type endopeptidase activity	10/521	151/18866	0.00927427	0.188158	0.165278	PDCD6/RIPK1/CARD8/F2R/HMGB1/DDX3X/PRR7/ARL6IP5/ASPH/S100A8	10										R-HSA-9013507	NOTCH3 Activation and Transmission of Signal to the Nucleus	3/331	25/10704	0.0407573	0.186786	0.148671	UBA52/APH1B/RPS27A	3
PEX16	AT8_down	GO:0007269	neurotransmitter secretion	11/521	175/18866	0.00949731	0.189463	0.166425	CSPG5/NLGN1/STX4/GAD1/DOC2B/NAPB/MCTP1/CAMK2A/CACNA1B/STXBP1/ADCY1	11										R-HSA-937041	IKK complex recruitment mediated by RIP1	3/331	25/10704	0.0407573	0.186786	0.148671	UBA52/RIPK1/RPS27A	3
SIL1	AT8_down	GO:0099643	signal release from synapse	11/521	175/18866	0.00949731	0.189463	0.166425	CSPG5/NLGN1/STX4/GAD1/DOC2B/NAPB/MCTP1/CAMK2A/CACNA1B/STXBP1/ADCY1	11										R-HSA-112315	Transmission across Chemical Synapses	14/331	270/10704	0.040972	0.186786	0.148671	SRC/TUBA1B/GAD1/SLC1A1/ACTN2/ARL6IP5/PRKAB2/CAMK1/CAMK2A/CACNG8/CACNA1B/STXBP1/ADCY1/TUBB2B	14
VPS53	AT8_down	GO:0052548	regulation of endopeptidase activity	21/521	434/18866	0.00959557	0.189463	0.166425	CST3/PDCD6/SRC/SFRP2/RIPK1/CARD8/F2R/PRNP/MBP/CRYAB/BIN1/SPOCK1/HMGB1/DDX3X/PRR7/ARL6IP5/APP/ASPH/AKIRIN2/ROCK2/S100A8	21										R-HSA-2871837	FCERI mediated NF-kB activation	6/331	82/10704	0.041144	0.186786	0.148671	UBA52/PSMD8/RELA/PSMD1/PSMB2/RPS27A	6
GAD1	AT8_down	GO:0002576	platelet degranulation	9/521	129/18866	0.00961031	0.189463	0.166425	TOR4A/TMX3/TF/LAMP2/ACTN2/APP/FN1/STXBP1/CD9	9										R-HSA-9013694	Signaling by NOTCH4	6/331	82/10704	0.041144	0.186786	0.148671	UBA52/PSMD8/PSMD1/APH1B/PSMB2/RPS27A	6
GTDC1	AT8_down	GO:0043624	cellular protein complex disassembly	13/521	224/18866	0.00962694	0.189463	0.166425	OXA1L/NCKAP5/NES/ABCE1/HDAC6/RDX/ACTN2/ASPH/NAPB/MRPL14/STMN1/ARHGEF2/CAMSAP2	13										R-HSA-5358351	Signaling by Hedgehog	9/331	149/10704	0.0416331	0.186786	0.148671	UBA52/TUBA1B/PSMD8/PSMD1/PSMB2/SMURF2/ADCY1/RPS27A/TUBB2B	9
MIR4458HG	AT8_down	GO:0007585	respiratory gaseous exchange by respiratory system	6/521	66/18866	0.00966482	0.189463	0.166425	NLGN1/NDN/NR4A2/GAA/ELN/STK40	6										R-HSA-1489509	DAG and IP3 signaling	4/331	43/10704	0.0430509	0.186786	0.148671	PRKCE/PDE1C/CAMK2A/ADCY1	4
TCAIM	AT8_down	GO:0032922	circadian regulation of gene expression	6/521	66/18866	0.00966482	0.189463	0.166425	PER3/GFPT1/ZFHX3/HDAC2/ATF4/ID4	6										R-HSA-1660661	Sphingolipid de novo biosynthesis	4/331	43/10704	0.0430509	0.186786	0.148671	ALDH3B1/CERS2/SAMD8/CERS6	4
UBE3C	AT8_down	GO:0046626	regulation of insulin receptor signaling pathway	6/521	66/18866	0.00966482	0.189463	0.166425	SRC/ERFE/TSC1/RPS6KB1/RELA/NUCKS1	6										R-HSA-5675221	Negative regulation of MAPK pathway	4/331	43/10704	0.0430509	0.186786	0.148671	UBA52/DUSP6/DUSP2/RPS27A	4
BIN1	AT8_down	GO:0009636	response to toxic substance	14/521	250/18866	0.00993271	0.191783	0.168463	CST3/BMP7/UBA52/GSTK1/MBP/ATF4/CNP/KDM1A/RALBP1/CPOX/MT2A/GSTP1/APOE/PRXL2B	14										R-HSA-9656223	Signaling by RAF1 mutants	4/331	43/10704	0.0430509	0.186786	0.148671	SRC/ACTG1/CAMK2A/FN1	4
ASIC2	AT8_down	GO:0031338	regulation of vesicle fusion	4/521	31/18866	0.0100179	0.191783	0.168463	KIF5B/DOC2B/AKT2/STXBP1	4										R-HSA-9018519	Estrogen-dependent gene expression	9/331	150/10704	0.0431424	0.186786	0.148671	CCND1/POLR2F/DDX5/STAG1/GPAM/KDM1A/KDM4B/KAT5/CARM1	9
RPS29	AT8_down	GO:0051497	negative regulation of stress fiber assembly	4/521	31/18866	0.0100179	0.191783	0.168463	WASF2/STMN1/ARHGEF18/PFN1	4										R-HSA-1236974	ER-Phagosome pathway	6/331	83/10704	0.0432479	0.186786	0.148671	UBA52/STX4/PSMD8/PSMD1/PSMB2/RPS27A	6
GAA	AT8_down	GO:0001678	cellular glucose homeostasis	10/521	153/18866	0.0101213	0.191783	0.168463	KLF15/PRKCE/STX4/LRP1/KIF5B/PPP3CA/IRS2/PIM3/NUCKS1/TRA2B	10										R-HSA-193692	Regulated proteolysis of p75NTR	2/331	11/10704	0.043607	0.186786	0.148671	RELA/APH1B	2
RPS17	AT8_down	GO:0030048	actin filament-based movement	10/521	153/18866	0.0101213	0.191783	0.168463	FRMD6/TNNT2/DSC2/WASF2/BIN1/EMP2/ACTN2/CACNA1C/ATP1A1/SUN2	10										R-HSA-196025	Formation of annular gap junctions	2/331	11/10704	0.043607	0.186786	0.148671	CLTB/ACTG1	2
LITAF	AT8_down	GO:0070169	positive regulation of biomineral tissue development	5/521	48/18866	0.0101547	0.191783	0.168463	BMP7/KL/ATF4/ATP2B1/GPM6B	5										R-HSA-77588	SLBP Dependent Processing of Replication-Dependent Histone Pre-mRNAs	2/331	11/10704	0.043607	0.186786	0.148671	NCBP1/SLBP	2
BAZ2B	AT8_down	GO:0110151	positive regulation of biomineralization	5/521	48/18866	0.0101547	0.191783	0.168463	BMP7/KL/ATF4/ATP2B1/GPM6B	5										R-HSA-8934903	Receptor Mediated Mitophagy	2/331	11/10704	0.043607	0.186786	0.148671	SRC/CSNK2A2	2
RAB3GAP2	AT8_down	GO:1900271	regulation of long-term synaptic potentiation	5/521	48/18866	0.0101547	0.191783	0.168463	PRNP/APP/FAM107A/ADCY1/APOE	5										R-HSA-9014325	TICAM1,TRAF6-dependent induction of TAK1 complex	2/331	11/10704	0.043607	0.186786	0.148671	UBA52/RPS27A	2
FAXDC2	AT8_down	GO:1990928	response to amino acid starvation	5/521	48/18866	0.0101547	0.191783	0.168463	WDR59/ATF4/FLCN/NPRL2/DEPDC5	5										R-HSA-9645460	Alpha-protein kinase 1 signaling pathway	2/331	11/10704	0.043607	0.186786	0.148671	UBA52/RPS27A	2
FAM92A	AT8_down	GO:0000380	alternative mRNA splicing, via spliceosome	7/521	87/18866	0.010283	0.193421	0.169901	DDX5/SRSF2/KDM1A/SRRM4/DDX17/QKI/TRA2B	7										R-HSA-9664873	Pexophagy	2/331	11/10704	0.043607	0.186786	0.148671	UBA52/RPS27A	2
ABCE1	AT8_down	GO:1903522	regulation of blood circulation	16/521	303/18866	0.01041	0.194404	0.170765	NPPC/TNNT2/DSC2/F2R/BIN1/ASIC2/GAA/SLC1A1/CACNA1C/THRA/ASPH/CACNG8/CACNA1B/TMEM38A/ATP2B1/ATP1A1	16										R-HSA-69306	DNA Replication	8/331	128/10704	0.0449135	0.190657	0.151752	UBA52/CDC16/POLE4/ANAPC10/PSMD8/PSMD1/PSMB2/RPS27A	8
RTCB	AT8_down	GO:0044539	long-chain fatty acid import into cell	3/521	17/18866	0.01067	0.194404	0.170765	AKT2/IRS2/RPS6KB1	3										R-HSA-2173788	Downregulation of TGF-beta receptor signaling	3/331	26/10704	0.0450512	0.190657	0.151752	UBA52/SMURF2/RPS27A	3
GPRC5B	AT8_down	GO:0055070	copper ion homeostasis	3/521	17/18866	0.01067	0.194404	0.170765	PRNP/APP/MT2A	3										R-HSA-901042	Calnexin/calreticulin cycle	3/331	26/10704	0.0450512	0.190657	0.151752	UBA52/CANX/RPS27A	3
PEX6	AT8_down	GO:0070875	positive regulation of glycogen metabolic process	3/521	17/18866	0.01067	0.194404	0.170765	PPP1R3E/AKT2/IRS2	3										R-HSA-6802957	Oncogenic MAPK signaling	6/331	84/10704	0.0454182	0.191444	0.152378	SRC/DUSP6/ACTG1/CAMK2A/FN1/QKI	6
SPOCK1	AT8_down	GO:0072673	lamellipodium morphogenesis	3/521	17/18866	0.01067	0.194404	0.170765	SRC/WASF2/CORO1B	3										R-HSA-2173793	Transcriptional activity of SMAD2/SMAD3:SMAD4 heterotrimer	4/331	44/10704	0.0462472	0.194165	0.154544	UBA52/TRIM33/SMURF2/RPS27A	4
FARSB	AT8_down	GO:0098962	regulation of postsynaptic neurotransmitter receptor activity	3/521	17/18866	0.01067	0.194404	0.170765	SRC/NPTXR/NPTX1	3										R-HSA-5632684	Hedgehog 'on' state	6/331	85/10704	0.0476553	0.198501	0.157995	UBA52/PSMD8/PSMD1/PSMB2/SMURF2/RPS27A	6
SPATA13	AT8_down	GO:0140354	lipid import into cell	3/521	17/18866	0.01067	0.194404	0.170765	AKT2/IRS2/RPS6KB1	3										R-HSA-69002	DNA Replication Pre-Initiation	6/331	85/10704	0.0476553	0.198501	0.157995	UBA52/POLE4/PSMD8/PSMD1/PSMB2/RPS27A	6
ATF4	AT8_down	GO:1902992	negative regulation of amyloid precursor protein catabolic process	3/521	17/18866	0.01067	0.194404	0.170765	PRNP/BIN1/APOE	3										R-HSA-76066	RNA Polymerase III Transcription Initiation From Type 2 Promoter	3/331	27/10704	0.0495601	0.204737	0.162958	POLR2F/POLR3E/BRF1	3
ID4	AT8_down	GO:0110053	regulation of actin filament organization	15/521	278/18866	0.0107234	0.194613	0.170949	WASF3/CDC42EP3/PRKCE/WASF2/BIN1/RDX/ACTN2/ELN/CORO1B/STMN1/ACTG1/TSC1/ARHGEF18/PFN1/ROCK2	15										R-HSA-109581	Apoptosis	10/331	178/10704	0.0496749	0.204737	0.162958	UBA52/RIPK1/CARD8/HMGB1/AKT2/PSMD8/PSMD1/PSMB2/SEPTIN4/RPS27A	10
LRP1	AT8_down	GO:0032755	positive regulation of interleukin-6 production	7/521	88/18866	0.0109142	0.196539	0.17264	F2R/DDX58/MBP/HMGB1/APP/ARHGEF2/AKIRIN2	7										R-HSA-8957275	Post-translational protein phosphorylation	7/331	108/10704	0.0498874	0.204737	0.162958	CST3/HSP90B1/SPP1/TF/APP/FN1/APOE	7
NDUFA5	AT8_down	GO:1901879	regulation of protein depolymerization	7/521	88/18866	0.0109142	0.196539	0.17264	NES/HDAC6/RDX/ACTN2/ASPH/ARHGEF2/CAMSAP2	7										R-HSA-6794362	Protein-protein interactions at synapses	6/331	86/10704	0.0499594	0.204737	0.162958	IL1RAP/NLGN1/HOMER3/APBA3/LRFN1/STXBP1	6
TEK	AT8_down	GO:0047496	vesicle transport along microtubule	5/521	49/18866	0.0110585	0.196731	0.172809	BLOC1S5/BICDL2/KIF1B/KIF5B/TRAK2	5
MOB2	AT8_down	GO:0010812	negative regulation of cell-substrate adhesion	6/521	68/18866	0.0111211	0.196731	0.172809	SRC/SEMA3E/SPOCK1/LRP1/FAM107A/MAP4K4	6
CNP	AT8_down	GO:0003016	respiratory system process	4/521	32/18866	0.0112045	0.196731	0.172809	NLGN1/NDN/GAA/STK40	4
EMP2	AT8_down	GO:0010165	response to X-ray	4/521	32/18866	0.0112045	0.196731	0.172809	CCND1/SFRP2/ERCC1/NUCKS1	4
HMGB1	AT8_down	GO:1901889	negative regulation of cell junction assembly	4/521	32/18866	0.0112045	0.196731	0.172809	SRC/LRP1/FAM107A/ROCK2	4
CTDNEP1	AT8_down	GO:1903955	positive regulation of protein targeting to mitochondrion	4/521	32/18866	0.0112045	0.196731	0.172809	RHOU/SREBF2/CSNK2A2/UBE2L3	4
AL627171.2	AT8_down	GO:0007041	lysosomal transport	8/521	110/18866	0.0112671	0.196731	0.172809	LAMP2/VPS53/BIN1/LRP1/MVB12A/RNF157/CACNG8/TRAK2	8
PDE1C	AT8_down	GO:0031589	cell-substrate adhesion	18/521	359/18866	0.0113003	0.196731	0.172809	CSPG5/SRC/PRKCE/SEMA3E/SPOCK1/LRP1/TEK/EMP2/SNED1/ACTN2/ACTG1/TSC1/FN1/PTPRK/FAM107A/ROCK2/GPM6B/MAP4K4	18
PUSL1	AT8_down	GO:0019318	hexose metabolic process	14/521	254/18866	0.0113059	0.196731	0.172809	PFKL/SRC/ERFE/MAPK14/POMC/CPT1A/PGAM2/GAA/ATF4/PPP1R3E/AKT2/IRS2/BRAT1/NISCH	14
RGS20	AT8_down	GO:0070372	regulation of ERK1 and ERK2 cascade	16/521	306/18866	0.0113574	0.19676	0.172835	GLIPR2/ACKR3/SRC/DUSP6/F2R/MTURN/LRP1/TEK/HMGB1/FLCN/APP/FN1/LMO3/GSTP1/CAMK2N1/APOE	16
SNHG10	AT8_down	GO:0060348	bone development	12/521	204/18866	0.0113961	0.19676	0.172835	DLX5/SRC/NPPC/SOX9/SH2B3/SFRP2/WASF2/TEK/CSGALNACT1/CARM1/RANBP3L/RAB23	12
AMER2	AT8_down	GO:0006836	neurotransmitter transport	13/521	229/18866	0.0114346	0.19676	0.172835	CSPG5/NLGN1/STX4/GAD1/ARL6IP5/DOC2B/NAPB/MCTP1/CAMK2A/CACNA1B/STXBP1/ADCY1/GPM6B	13
GFOD2	AT8_down	GO:0043484	regulation of RNA splicing	10/521	156/18866	0.0115008	0.197169	0.173193	DDX5/NCBP1/RRP1B/SRSF2/SRRM4/DDX17/C9orf78/QKI/AHNAK/TRA2B	10
RRP1B	AT8_down	GO:0072659	protein localization to plasma membrane	15/521	281/18866	0.0117439	0.200521	0.176138	TMEM150A/TMBIM1/PRKCE/PRNP/STX4/LRP1/EMP2/KIF5B/RAB40C/RDX/ACTN2/RAB26/AKT2/STXBP1/ROCK2	15
POLR1A	AT8_down	GO:0035966	response to topologically incorrect protein	12/521	205/18866	0.0118127	0.200521	0.176138	CCND1/HSPA13/HSP90B1/GFPT1/ATF4/HDAC6/BAG6/CANX/TMEM129/AUP1/ACADVL/ZBTB17	12
SPATA7	AT8_down	GO:0051495	positive regulation of cytoskeleton organization	13/521	230/18866	0.0118258	0.200521	0.176138	WASF3/CDC42EP3/PRKCE/NES/WASF2/BIN1/TEK/ACTN2/CORO1B/TSC1/FES/PFN1/ROCK2	13
AC012467.2	AT8_down	GO:0045540	regulation of cholesterol biosynthetic process	5/521	50/18866	0.0120157	0.201314	0.176834	TM7SF2/GPAM/SREBF2/HMGCS1/APOE	5
DDX3X	AT8_down	GO:0106118	regulation of sterol biosynthetic process	5/521	50/18866	0.0120157	0.201314	0.176834	TM7SF2/GPAM/SREBF2/HMGCS1/APOE	5
TBCK	AT8_down	GO:0050796	regulation of insulin secretion	11/521	181/18866	0.0120251	0.201314	0.176834	PFKL/PRKCE/CPT1A/STX4/LRP1/KIF5B/CACNA1C/DOC2B/PPP3CA/IRS2/PIM3	11
HDAC6	AT8_down	GO:0008016	regulation of heart contraction	14/521	256/18866	0.0120459	0.201314	0.176834	NPPC/TNNT2/DSC2/BIN1/GAA/SLC1A1/CACNA1C/THRA/ASPH/CACNG8/CACNA1B/TMEM38A/ATP2B1/ATP1A1	14
MVB12A	AT8_down	GO:0043280	positive regulation of cysteine-type endopeptidase activity involved in apoptotic process	9/521	134/18866	0.01214	0.20216	0.177577	PDCD6/RIPK1/CARD8/F2R/HMGB1/DDX3X/PRR7/ARL6IP5/S100A8	9
AC132938.1	AT8_down	GO:0032868	response to insulin	15/521	283/18866	0.0124654	0.205234	0.180278	SMARCC1/SRC/KL/KLF15/ERFE/ATP6V1B2/AKT2/IRS2/TSC1/RPS6KB1/RELA/ATP2B1/NUCKS1/ATP6V1E1/GSTP1	15
LANCL3	AT8_down	GO:0090316	positive regulation of intracellular protein transport	11/521	182/18866	0.012492	0.205234	0.180278	MAPK14/CTDSPL2/PRNP/RHOU/KIF5B/SREBF2/AKT2/CSNK2A2/CAMK1/IPO5/UBE2L3	11
SLC13A3	AT8_down	GO:0032780	negative regulation of ATPase activity	3/521	18/18866	0.0125455	0.205234	0.180278	TNNT2/OXA1L/TSC1	3
PPP1R3E	AT8_down	GO:0051895	negative regulation of focal adhesion assembly	3/521	18/18866	0.0125455	0.205234	0.180278	SRC/LRP1/FAM107A	3
HECW2	AT8_down	GO:0150118	negative regulation of cell-substrate junction organization	3/521	18/18866	0.0125455	0.205234	0.180278	SRC/LRP1/FAM107A	3
TNFRSF14	AT8_down	GO:0032368	regulation of lipid transport	9/521	135/18866	0.0127004	0.205297	0.180333	ERFE/POMC/SPP1/TSPO/LRP1/SREBF2/AKT2/IRS2/APOE	9
DGKB	AT8_down	GO:0010769	regulation of cell morphogenesis involved in differentiation	16/521	310/18866	0.0127249	0.205297	0.180333	CSPG5/NLGN1/SEMA3E/SPP1/LRP1/HECW2/TBR1/TIAM2/DPYSL2/PPP3CA/FN1/TRAK2/TUBB2B/CNTN2/APOE/OBSL1	16
THAP3	AT8_down	GO:0008088	axo-dendritic transport	6/521	70/18866	0.0127261	0.205297	0.180333	BLOC1S5/KIF1B/SPG11/KIF5B/APP/TRAK2	6
KIF1B	AT8_down	GO:0050795	regulation of behavior	6/521	70/18866	0.0127261	0.205297	0.180333	PER3/NLGN1/ZFHX3/HDAC2/AHI1/APOE	6
RFX5	AT8_down	GO:1903034	regulation of response to wounding	11/521	183/18866	0.0129725	0.205441	0.18046	SH2B3/PRKCE/F2R/SPP1/LRP1/CERS2/SLC12A2/ACTG1/ENPP4/CD9/APOE	11
SCAMP3	AT8_down	GO:0034103	regulation of tissue remodeling	7/521	91/18866	0.0129759	0.205441	0.18046	CST3/SRC/TMBIM1/SPP1/TF/PPP3CA/ROCK2	7
KDM4C	AT8_down	GO:0051492	regulation of stress fiber assembly	7/521	91/18866	0.0129759	0.205441	0.18046	WASF2/STMN1/ACTG1/TSC1/ARHGEF18/PFN1/ROCK2	7
GPRC5C	AT8_down	GO:0051092	positive regulation of NF-kappaB transcription factor activity	10/521	159/18866	0.013018	0.205441	0.18046	IL1RAP/UBA52/RIPK1/APP/CAMK2A/ARHGEF2/CARM1/RELA/RPS27A/S100A8	10
PLEKHA6	AT8_down	GO:0065002	intracellular protein transmembrane transport	5/521	51/18866	0.0130275	0.205441	0.18046	PEX16/PEX6/TOMM20/AKT2/TRAM1	5
GPAM	AT8_down	GO:0009743	response to carbohydrate	13/521	233/18866	0.0130618	0.205441	0.18046	CST3/PFKL/PRKCE/STX4/LRP1/GPAM/KIF5B/ERCC1/PPP3CA/IRS2/PIM3/TRA2B/GSTP1	13
PIM2	AT8_down	GO:2001234	negative regulation of apoptotic signaling pathway	13/521	233/18866	0.0130618	0.205441	0.18046	ACKR3/SRC/TMBIM1/SFRP2/NR4A2/RIPK1/ITPRIP/DDX3X/KDM1A/CSNK2A2/ARHGEF2/RELA/GSTP1	13
C12orf45	AT8_down	GO:0048024	regulation of mRNA splicing, via spliceosome	8/521	113/18866	0.0131102	0.205441	0.18046	DDX5/NCBP1/SRSF2/SRRM4/DDX17/C9orf78/QKI/TRA2B	8
MALAT1	AT8_down	GO:0071456	cellular response to hypoxia	12/521	208/18866	0.013133	0.205441	0.18046	BMP7/SRC/UBA52/PRKCE/MALAT1/PSMD8/PSMD1/PSMB2/S100B/B3GAT1/RPS27A/ROCK2	12
LRRC75A	AT8_down	GO:0042982	amyloid precursor protein metabolic process	6/521	71/18866	0.0135866	0.209449	0.18398	PRNP/BIN1/APP/RELA/ROCK2/APOE	6
SULT1C4	AT8_down	GO:0035303	regulation of dephosphorylation	12/521	209/18866	0.0135973	0.209449	0.18398	SRC/PPP4R4/HSP90B1/RRP1B/CAMTA1/LMTK2/RCAN2/PPP1R12A/TSC1/RIMBP2/RCAN1/ROCK2	12
FAM131C	AT8_down	GO:0051403	stress-activated MAPK cascade	15/521	286/18866	0.0136121	0.209449	0.18398	MAGI3/UBA52/SFRP2/MAPK14/RIPK1/CRYAB/TF/MTURN/HMGB1/ARL6IP5/APP/PJA2/RPS27A/GSTP1/MAP4K4	15
SNED1	AT8_down	GO:0002756	MyD88-independent toll-like receptor signaling pathway	4/521	34/18866	0.01384	0.209449	0.18398	UBA52/PRKCE/RIPK1/RPS27A	4
PHC1	AT8_down	GO:0002888	positive regulation of myeloid leukocyte mediated immunity	4/521	34/18866	0.01384	0.209449	0.18398	DDX58/STX4/GAB2/STXBP1	4
BCS1L	AT8_down	GO:0007616	long-term memory	4/521	34/18866	0.01384	0.209449	0.18398	PRNP/PJA2/ADCY1/APOE	4
SPG11	AT8_down	GO:0032232	negative regulation of actin filament bundle assembly	4/521	34/18866	0.01384	0.209449	0.18398	WASF2/STMN1/ARHGEF18/PFN1	4
TBR1	AT8_down	GO:0035633	maintenance of blood-brain barrier	4/521	34/18866	0.01384	0.209449	0.18398	MBP/SLC1A1/SLC12A2/ACTG1	4
KIF5B	AT8_down	GO:0046685	response to arsenic-containing substance	4/521	34/18866	0.01384	0.209449	0.18398	SRRT/ATF4/DDX3X/CPOX	4
SLC38A3	AT8_down	GO:0055094	response to lipoprotein particle	4/521	34/18866	0.01384	0.209449	0.18398	SREBF2/HMGCS1/CD9/APOE	4
POLE4	AT8_down	GO:0001505	regulation of neurotransmitter levels	13/521	235/18866	0.0139395	0.210269	0.1847	CSPG5/NLGN1/STX4/GAD1/ARL6IP5/DOC2B/NAPB/MCTP1/CAMK2A/CACNA1B/STXBP1/ADCY1/GPM6B	13
POLR3E	AT8_down	GO:0046580	negative regulation of Ras protein signal transduction	5/521	52/18866	0.0140954	0.211932	0.186162	CCDC125/FLCN/HEG1/STMN1/MAPKAP1	5
RAB40C	AT8_down	GO:0060560	developmental growth involved in morphogenesis	13/521	236/18866	0.0143949	0.215301	0.189121	SOX9/NDN/SFRP2/SEMA3E/SPP1/LRP1/HDAC6/SPG11/APP/DPYSL2/RNF157/FN1/APOE	13
LINC00507	AT8_down	GO:0050770	regulation of axonogenesis	11/521	186/18866	0.0144984	0.215301	0.189121	SEMA3E/SPP1/LRP1/TBR1/TIAM2/DPYSL2/FN1/TRAK2/TUBB2B/CNTN2/APOE	11
PRR7	AT8_down	GO:0003417	growth plate cartilage development	3/521	19/18866	0.0145975	0.215301	0.189121	NPPC/SOX9/CARM1	3
RDX	AT8_down	GO:0010544	negative regulation of platelet activation	3/521	19/18866	0.0145975	0.215301	0.189121	SH2B3/CD9/APOE	3
SLC1A1	AT8_down	GO:0031643	positive regulation of myelination	3/521	19/18866	0.0145975	0.215301	0.189121	WASF3/MYRF/S100B	3
PLP1	AT8_down	GO:0098911	regulation of ventricular cardiac muscle cell action potential	3/521	19/18866	0.0145975	0.215301	0.189121	DSC2/BIN1/CACNA1C	3
CAMTA1	AT8_down	GO:1904951	positive regulation of establishment of protein localization	18/521	370/18866	0.0149768	0.219974	0.193225	SRC/PRKCE/MAPK14/CTDSPL2/PRNP/RHOU/STX4/LRP1/KIF5B/DOC2B/SREBF2/AKT2/CSNK2A2/IRS2/CAMK1/IPO5/UBE2L3/CCT4	18
SMIM12	AT8_down	GO:0050821	protein stabilization	11/521	187/18866	0.015036	0.219974	0.193225	PER3/CRYAB/LAMP2/PEX6/PIM2/BAG6/TSC1/NAPG/CCT4/STXBP1/PFN1	11
FLCN	AT8_down	GO:0035304	regulation of protein dephosphorylation	9/521	139/18866	0.0151359	0.219974	0.193225	PPP4R4/HSP90B1/CAMTA1/LMTK2/RCAN2/PPP1R12A/TSC1/RCAN1/ROCK2	9
BAG6	AT8_down	GO:0032640	tumor necrosis factor production	8/521	116/18866	0.0151647	0.219974	0.193225	RIPK1/POMC/HDAC2/TSPO/HMGB1/APP/ARHGEF2/GSTP1	8
UBE2E3	AT8_down	GO:0010976	positive regulation of neuron projection development	15/521	290/18866	0.0152666	0.219974	0.193225	BMP7/NLGN1/VLDLR/LRP1/MOB2/TIAM2/KDM1A/RNF157/CAMK1/FN1/FES/TOX/TUBB2B/APOE/OBSL1	15
ACTN2	AT8_down	GO:0051494	negative regulation of cytoskeleton organization	10/521	163/18866	0.0152691	0.219974	0.193225	RBM14/WASF2/HDAC6/RDX/CORO1B/STMN1/ARHGEF2/ARHGEF18/CAMSAP2/PFN1	10
ARGLU1	AT8_down	GO:0032801	receptor catabolic process	4/521	35/18866	0.0152931	0.219974	0.193225	VLDLR/MVB12A/PIK3R4/APOE	4
LMTK2	AT8_down	GO:1901223	negative regulation of NIK/NF-kappaB signaling	4/521	35/18866	0.0152931	0.219974	0.193225	BMP7/LITAF/DDX3X/RELA	4
CERS2	AT8_down	GO:0005977	glycogen metabolic process	6/521	73/18866	0.0154278	0.221227	0.194326	POMC/GAA/PPP1R3E/STK40/AKT2/IRS2	6
EPN1	AT8_down	GO:0007254	JNK cascade	12/521	213/18866	0.0155807	0.222606	0.195538	MAGI3/UBA52/SFRP2/RIPK1/TF/MTURN/HMGB1/APP/PJA2/RPS27A/GSTP1/MAP4K4	12
CACNA1C	AT8_down	GO:0051090	regulation of DNA-binding transcription factor activity	21/521	455/18866	0.0156198	0.222606	0.195538	BMP7/IL1RAP/UBA52/MAPK14/RIPK1/CARD8/DDX58/PRNP/MTURN/HDAC2/APP/KDM1A/PPP3CA/CAMK2A/ARHGEF2/CARM1/RELA/BRMS1/ADCY1/RPS27A/S100A8	21
SEPTIN7	AT8_down	GO:2000116	regulation of cysteine-type endopeptidase activity	13/521	239/18866	0.0158299	0.224162	0.196904	PDCD6/SRC/SFRP2/RIPK1/CARD8/F2R/CRYAB/HMGB1/DDX3X/PRR7/ARL6IP5/ASPH/S100A8	13
SRSF2	AT8_down	GO:0043666	regulation of phosphoprotein phosphatase activity	8/521	117/18866	0.0158987	0.224162	0.196904	PPP4R4/HSP90B1/LMTK2/RCAN2/PPP1R12A/TSC1/RCAN1/ROCK2	8
SMIM14	AT8_down	GO:0062012	regulation of small molecule metabolic process	21/521	456/18866	0.0159678	0.224162	0.196904	SRC/SOX9/ERFE/PRKCE/POMC/CPT1A/TM7SF2/PPP1R3E/GPAM/FLCN/APP/SREBF2/PRKAB2/AKT2/PSMD8/IRS2/PSMD1/PSMB2/HMGCS1/ACADVL/APOE	21
TIAM2	AT8_down	GO:0045785	positive regulation of cell adhesion	20/521	428/18866	0.0159803	0.224162	0.196904	CSPG5/BMP7/SRC/PRKCE/PTPRU/SFRP2/ZFHX3/STX4/TEK/EMP2/HMGB1/TNFRSF14/GPAM/FLCN/PPP3CA/TSC1/FN1/RELA/CD24/MAP4K4	20
RAB26	AT8_down	GO:0070167	regulation of biomineral tissue development	7/521	95/18866	0.0161415	0.224162	0.196904	BMP7/SOX9/KL/ATF4/ATP2B1/ROCK2/GPM6B	7
THRA	AT8_down	GO:0110149	regulation of biomineralization	7/521	95/18866	0.0161415	0.224162	0.196904	BMP7/SOX9/KL/ATF4/ATP2B1/ROCK2/GPM6B	7
CLDND1	AT8_down	GO:0010565	regulation of cellular ketone metabolic process	11/521	189/18866	0.0161559	0.224162	0.196904	SOX9/ERFE/PRKCE/CPT1A/PRKAB2/AKT2/PSMD8/IRS2/PSMD1/PSMB2/ACADVL	11
ACAD11	AT8_down	GO:0032757	positive regulation of interleukin-8 production	5/521	54/18866	0.0164041	0.224162	0.196904	RIPK1/F2R/DDX58/HMGB1/RELA	5
ELN	AT8_down	GO:0006073	cellular glucan metabolic process	6/521	74/18866	0.0164103	0.224162	0.196904	POMC/GAA/PPP1R3E/STK40/AKT2/IRS2	6
SQOR	AT8_down	GO:0032024	positive regulation of insulin secretion	6/521	74/18866	0.0164103	0.224162	0.196904	PRKCE/STX4/LRP1/KIF5B/DOC2B/IRS2	6
SEL1L3	AT8_down	GO:0044042	glucan metabolic process	6/521	74/18866	0.0164103	0.224162	0.196904	POMC/GAA/PPP1R3E/STK40/AKT2/IRS2	6
CKS1B	AT8_down	GO:0043281	regulation of cysteine-type endopeptidase activity involved in apoptotic process	12/521	215/18866	0.016651	0.224162	0.196904	PDCD6/SRC/SFRP2/RIPK1/CARD8/F2R/CRYAB/HMGB1/DDX3X/PRR7/ARL6IP5/S100A8	12
MTCH2	AT8_down	GO:0010042	response to manganese ion	3/521	20/18866	0.0168278	0.224162	0.196904	TSPO/ATF4/APP	3
ZBTB33	AT8_down	GO:0031998	regulation of fatty acid beta-oxidation	3/521	20/18866	0.0168278	0.224162	0.196904	CPT1A/AKT2/IRS2	3
ARL6IP5	AT8_down	GO:0032495	response to muramyl dipeptide	3/521	20/18866	0.0168278	0.224162	0.196904	MAPK14/ARHGEF2/RELA	3
EFHD1	AT8_down	GO:0034315	regulation of Arp2/3 complex-mediated actin nucleation	3/521	20/18866	0.0168278	0.224162	0.196904	WASF3/WASF2/CORO1B	3
TMEM167B	AT8_down	GO:0097709	connective tissue replacement	3/521	20/18866	0.0168278	0.224162	0.196904	F2R/PPP3CA/ROCK2	3
PPP1R12B	AT8_down	GO:1902004	positive regulation of amyloid-beta formation	3/521	20/18866	0.0168278	0.224162	0.196904	APP/RELA/ROCK2	3
[truncated: 425 more rows]

## Sheet: AT8_Aβ_up_level 3
DEGs in this data sheet were identified by comparing genes in AT8/Aβ positive spots with genes in its level 3 spots, which are 245 µm away from AT8/Aβ positive spots. All the DEGs in this data sheet were significantly upregulated in AT8/Aβ positive spots than in level 3 spots. The pathway analysis was performed as previously described. Top pathways of interest with significance (adjust p value is…
[truncated: 419 more rows]

[truncated: 15 more sheets: AT8_Aβ_down_level 3, GFAP_AT8_Aβ_up_level 3, GFAP_AT8_Aβ_down_level 3, P2RY12_AT8_Aβ_up_level 3, P2RY12_AT8_Aβ_down_level 3, Aβ_up_level 2, Aβ_down_level 2, AT8_up_level 2, AT8_down_level 2, AT8_Aβ_up_level 2, AT8_Aβ_down_level 2, GFAP_AT8_Aβ_up_level 2, GFAP_AT8_Aβ_down_level 2, P2RY12_AT8_Aβ_up_level 2, P2RY12_AT8_Aβ_down_level 2]
