# Supplementary material for: Spatially resolved transcriptomics reveals gene signatures underlying the vulnerability of human middle temporal gyrus in Alzheimer's disease
Source: Research Square preprint supplement (doi:10.21203/rs.3.rs-855234/v1), 2021-09-10
Supplement: Supplementary file 10 [file cbcbdefcd55341c06a15f3f6.xlsx]

## Sheet: AD upregulated 2164 genes
AD upregulated DEGs were selected if the adjusted p-value was less than 0.05 and the absolute value of log-fold change was higher than 0.1. GeneRatio is in N/M format where M is the number of total genes in this list that match the GO term, while N represents the number of genes matches the genes in a certain pathway (or Count, in column P). Similarly, the numbers in BgRatio represent the total n…
							GO enrichment analysis									KEGG pathway analysis									Reactome analysis
Gene	p_val	avg_logFC	pct.1	pct.2	p_val_adj	p_val_adj_soft	ID	Description	GeneRatio	BgRatio	pvalue	p.adjust	qvalue	geneID	Count	ID	Description	GeneRatio	BgRatio	pvalue	p.adjust	qvalue	geneID	Count	ID	Description	GeneRatio	BgRatio	pvalue	p.adjust	qvalue	geneID	Count
MTRNR2L1	0	2.13845	0.794	0.515	0	0	GO:0000184	nuclear-transcribed mRNA catabolic process, nonsense-mediated decay	74/2012	120/18866	9.1208e-42	5.45059e-38	4.0458e-38	RPS2/RPS19/RPL13/RPSA/UBA52/RPL4/RPS28/RPS6/RPL13A/RPS18/RPL28/RPLP1/RPL39/RPL29/RPLP0/RPL37A/RPL7A/RPS17/RPL19/RPLP2/RPL17/RPS15/RPL31/RPS14/RPL24/RPL5/RPL11/RPL30/RPL15/RPL27A/RPL18/RPL23/RPS8/RPS23/RPL35/RPL32/RPS3/RPS9/RPS11/RPL18A/RPL27/RPL8/RPL34/RPL7/RPL10A/PPP2CA/RPS5/RPL6/RPS24/RPL22/RPL10/RPL36A/EIF4G1/RPL21/RPS3A/RPL9/RPL38/RPL3/RPL12/RPS16/PPP2R1A/CASC3/RPL37/RPS27A/PABPC1/RPL14/RPS12…	74	hsa03010	Ribosome	68/1041	158/8112	1.72016e-21	5.50453e-19	3.94732e-19	RPS2/RPS19/RPL13/RPSA/UBA52/RPL4/RPS28/RPS6/RPL13A/RPS18/RPS18/RPS18/RPS18/RPS18/RPS18/RPL28/RPLP1/RPL39/RPL29/RPLP0/RPL37A/RPL7A/RPL7A/FAU/RPS17/RPS17/RPL19/RPLP2/RPL17/RPS15/RPL31/RPS14/RPL24/RPL5/RPL11/RPL30/RPL15/RPL27A/RPL18/RPL23/RPS8/RPS23/RPL35/RPL32/RPS3/RPS9/RPS9/RPS9/RPS9/RPS9/RPS9/RPS9/RPS9/RPS9/RPS9/RPS11/RPL18A/RPL27/RPL8/RPL34/RPL7/RPL10A/RPS5/RPL6/RPS24/RPL22/RPL10/RPL36A/RPL21/RP…	68	R-HSA-156842	Eukaryotic Translation Elongation	70/1351	93/10704	4.94688e-44	6.71787e-41	4.30118e-41	RPS2/RPS19/RPL13/RPSA/UBA52/RPL4/RPS28/RPS6/RPL13A/RPS18/RPL28/RPLP1/RPL39/RPL29/EEF1A1/RPLP0/RPL37A/RPL7A/EEF1B2/RPS17/RPL19/RPLP2/RPL17/RPS15/RPL31/RPS14/RPL24/RPL5/RPL11/RPL30/RPL15/RPL27A/RPL18/RPL23/RPS8/RPS23/RPL35/RPL32/RPS3/RPS9/RPS11/RPL18A/RPL27/RPL8/RPL34/RPL7/EEF1A2/EEF1G/RPL10A/RPS5/RPL6/RPS24/EEF2/RPL22/RPL10/RPL36A/RPL21/RPS3A/RPL9/RPL38/RPL3/RPL12/RPS16/RPL37/RPS27A/RPL14/RPS12/RP…	70
SERPINA3	0	1.39676	0.666	0.47	0	0	GO:0006613	cotranslational protein targeting to membrane	70/2012	109/18866	2.72551e-41	8.14384e-38	6.0449e-38	RPS2/RPS19/RPL13/RPSA/UBA52/RPL4/RPS28/RPS6/RPL13A/RPS18/RPL28/RPLP1/RPL39/RPL29/RPLP0/RPL37A/RPL7A/RPS17/ARL6IP1/RPL19/RPLP2/RPL17/RPS15/RPL31/RPS14/RPL24/RPL5/RPL11/RPL30/RPL15/RPL27A/RPL18/RPL23/RPS8/RPS23/RPL35/RPL32/RPS3/RPS9/RPS11/RPL18A/RPL27/RPL8/RPL34/RPL7/RPL10A/RPS5/RPL6/RPS24/RPL22/RPL10/RPL36A/RPL21/RPS3A/RPL9/RPL38/RPL3/RPL12/RPS16/RPL37/RPS27A/SEC61A2/RPL14/RPS12/SSR3/RPL26/SRPRA/S…	70	hsa05171	Coronavirus disease - COVID-19	81/1041	232/8112	1.4937e-18	2.38992e-16	1.71382e-16	C1QB/C1QA/C3/C1QC/MAPK1/PRKCG/RPS2/RPS19/RPL13/RPSA/UBA52/RPL4/RPS28/RPS6/RPL13A/RPS18/RPS18/RPS18/RPS18/RPS18/RPS18/RPL28/RPLP1/RPL39/RPL29/RPLP0/RPL37A/RPL7A/RPL7A/FAU/RPS17/RPS17/RPL19/RPLP2/RPL17/RPS15/RPL31/RPS14/RPL24/RPL5/C1R/C1R/RPL11/RPL30/RPL15/RPL27A/RPL18/RPL23/RPS8/RPS23/RPL35/RPL32/RPS3/RPS9/RPS9/RPS9/RPS9/RPS9/RPS9/RPS9/RPS9/RPS9/RPS9/RPS11/RPL18A/RPL27/MAPK3/RPL8/RPL34/RPL7/RPL10A…	81	R-HSA-156902	Peptide chain elongation	66/1351	89/10704	7.28495e-41	4.94648e-38	3.16704e-38	RPS2/RPS19/RPL13/RPSA/UBA52/RPL4/RPS28/RPS6/RPL13A/RPS18/RPL28/RPLP1/RPL39/RPL29/EEF1A1/RPLP0/RPL37A/RPL7A/RPS17/RPL19/RPLP2/RPL17/RPS15/RPL31/RPS14/RPL24/RPL5/RPL11/RPL30/RPL15/RPL27A/RPL18/RPL23/RPS8/RPS23/RPL35/RPL32/RPS3/RPS9/RPS11/RPL18A/RPL27/RPL8/RPL34/RPL7/RPL10A/RPS5/RPL6/RPS24/EEF2/RPL22/RPL10/RPL36A/RPL21/RPS3A/RPL9/RPL38/RPL3/RPL12/RPS16/RPL37/RPS27A/RPL14/RPS12/RPL26/RPS20	66
CHI3L1	0	1.08584	0.694	0.283	0	0	GO:0006614	SRP-dependent cotranslational protein targeting to membrane	68/2012	105/18866	1.69152e-40	3.3695e-37	2.50107e-37	RPS2/RPS19/RPL13/RPSA/UBA52/RPL4/RPS28/RPS6/RPL13A/RPS18/RPL28/RPLP1/RPL39/RPL29/RPLP0/RPL37A/RPL7A/RPS17/RPL19/RPLP2/RPL17/RPS15/RPL31/RPS14/RPL24/RPL5/RPL11/RPL30/RPL15/RPL27A/RPL18/RPL23/RPS8/RPS23/RPL35/RPL32/RPS3/RPS9/RPS11/RPL18A/RPL27/RPL8/RPL34/RPL7/RPL10A/RPS5/RPL6/RPS24/RPL22/RPL10/RPL36A/RPL21/RPS3A/RPL9/RPL38/RPL3/RPL12/RPS16/RPL37/RPS27A/SEC61A2/RPL14/RPS12/SSR3/RPL26/SRPRA/RPS20/SRP…	68	hsa04144	Endocytosis	78/1041	252/8112	1.4827e-14	1.58154e-12	1.13413e-12	HSPA1A/HSPA1A/HSPA1A/HSPA1A/HSPA1A/SH3GL2/PSD3/DNAJC6/BIN1/ARF1/SNX3/AP2M1/HLA-B/HLA-B/HLA-B/HLA-B/HLA-B/HLA-B/DNM1/ARF3/HLA-A/HLA-A/HLA-A/HLA-A/HLA-A/HLA-A/HLA-A/HLA-A/ARPC5/AGAP1/CAPZB/RAB11FIP4/RAB7A/AGAP3/CLTC/AGAP2/HRAS/HRAS/SH3GL3/CLTA/HSPA8/KIF5C/KIF5C/GIT1/ARPC4/ARRB2/HSPA2/CDC42/AP2S1/PRKCZ/AP2B1/HSPA1B/HSPA1B/HSPA1B/HSPA1B/HSPA1B/RAB11FIP3/RAB11FIP3/ARPC3/CHMP1B/CHMP1A/SH3GLB2/CAPZA1/AC…	78	R-HSA-156827	L13a-mediated translational silencing of Ceruloplasmin expression	74/1351	111/10704	1.84274e-40	8.34147e-38	5.34072e-38	RPS2/RPS19/RPL13/RPSA/UBA52/RPL4/RPS28/RPS6/RPL13A/RPS18/RPL28/RPLP1/RPL39/RPL29/RPLP0/RPL37A/RPL7A/RPS17/EIF4A2/RPL19/RPLP2/RPL17/RPS15/RPL31/RPS14/RPL24/RPL5/RPL11/RPL30/RPL15/RPL27A/RPL18/RPL23/RPS8/RPS23/RPL35/RPL32/RPS3/RPS9/EIF4H/RPS11/RPL18A/RPL27/RPL8/RPL34/RPL7/RPL10A/RPS5/RPL6/RPS24/RPL22/RPL10/RPL36A/EIF4G1/RPL21/RPS3A/RPL9/RPL38/RPL3/RPL12/RPS16/RPL37/RPS27A/EIF3M/PABPC1/RPL14/EIF3B/R…	74
PLP1	0	1.05097	0.983	0.874	0	0	GO:0006605	protein targeting	149/2012	444/18866	1.51363e-39	1.97121e-36	1.46316e-36	HSP90AA1/YWHAZ/RPS2/RPS19/RPL13/RPSA/YWHAB/UBA52/YWHAG/RPL4/YWHAE/UBB/RPS28/PRNP/GDI1/RPS6/RPL13A/RPS18/RPL28/RPLP1/RPL39/RPL29/SREBF2/HPCA/HSPD1/YWHAQ/RPLP0/RPL37A/RPL7A/RPS17/ARL6IP1/LAMP2/ITGB2/RPL19/PAK1/RPLP2/RPL17/RPS15/RPL31/RPS14/HSPA5/SYNGR1/RPL24/RPL5/CACNG3/RPL11/RPL30/CLU/RPL15/RPL27A/RPL18/RPL23/RPS8/ERBIN/RPS23/RPL35/CDK5R1/RPL32/RPS3/HSPA4/RTP5/RAB7A/RPS9/RPS11/RPL18A/RPL27/RPL8/HR…	149	hsa05132	Salmonella infection	75/1041	249/8112	2.3579e-13	1.88632e-11	1.35269e-11	TUBA1A/HSP90AA1/HSP90B1/MAPK1/HSP90AB1/TUBA1B/TUBB4A/MAP2K1/TUBB/TUBB/TUBB/TUBB/TUBB/TUBB/TUBB/TUBB/TUBB2A/GAPDH/ACTB/S100A10/ARF1/DYNLL1/PAK1/DCTN1/ARPC5/PFN1/TUBB3/TXN/CYFIP2/RPS3/RAB7A/ARL8A/RAC1/MAPK3/HRAS/HRAS/DYNLL2/KLC1/KIF5C/KIF5C/SKP1/ARPC4/DYNC1LI2/VPS41/CDC42/DCTN5/PAK3/ARPC3/DYNC1H1/ACTR3B/CTNNB1/DYNLRB1/RAB5B/ARL8B/FLNA/ACTR3/ARPC1B/NCKAP1/JUN/TUBA4A/RHOG/DYNC1I1/M6PR/ACTR1A/BRK1/RHO…	75	R-HSA-1799339	SRP-dependent cotranslational protein targeting to membrane	74/1351	112/10704	4.78587e-40	1.29984e-37	8.32238e-38	RPS2/RPS19/RPL13/RPSA/UBA52/RPL4/RPS28/RPS6/RPL13A/RPS18/RPL28/RPLP1/RPL39/RPL29/RPLP0/RPL37A/RPL7A/RPS17/RPL19/RPLP2/RPL17/RPS15/RPL31/RPS14/RPL24/RPL5/RPL11/RPL30/RPL15/RPL27A/RPL18/RPL23/RPS8/RPS23/RPL35/RPL32/RPS3/RPS9/SEC11C/RPS11/RPL18A/RPL27/RPL8/RPL34/RPL7/RPL10A/RPS5/RPL6/RPS24/RPL22/RPL10/RPL36A/RPL21/RPS3A/RPL9/RPL38/RPL3/RPL12/RPS16/RPL37/RPN2/SPCS3/RPS27A/SEC61A2/RPL14/RPS12/SSR3/RPL…	74
MBP	0	0.90902	0.998	0.993	0	0	GO:0045047	protein targeting to ER	72/2012	120/18866	1.64927e-39	1.97121e-36	1.46316e-36	RPS2/RPS19/RPL13/RPSA/UBA52/RPL4/RPS28/RPS6/RPL13A/RPS18/RPL28/RPLP1/RPL39/RPL29/RPLP0/RPL37A/RPL7A/RPS17/RPL19/RPLP2/RPL17/RPS15/RPL31/RPS14/HSPA5/RPL24/RPL5/RPL11/RPL30/RPL15/RPL27A/RPL18/RPL23/RPS8/RPS23/RPL35/RPL32/RPS3/RPS9/RPS11/RPL18A/RPL27/RPL8/RPL34/RPL7/RPL10A/RPS5/RPL6/RPS24/RPL22/RPL10/RPL36A/RPL21/RPS3A/RPL9/RPL38/RPL3/RPL12/RPS16/RPL37/SPCS3/RPS27A/SEC61A2/GET1/RPL14/RPS12/SSR3/RPL2…	72	hsa04145	Phagosome	52/1041	152/8112	6.20903e-12	3.97378e-10	2.84962e-10	C3/TUBA1A/TUBA1B/CALR/TUBB4A/HLA-DRA/HLA-DRA/HLA-DRA/HLA-DRA/HLA-DRA/HLA-DRA/HLA-DRA/TUBB/TUBB/TUBB/TUBB/TUBB/TUBB/TUBB/TUBB/CANX/CANX/ATP6V0C/TUBB2A/ACTB/CORO1A/ATP6AP1/ATP6V1H/HLA-B/HLA-B/HLA-B/HLA-B/HLA-B/HLA-B/LAMP2/ITGB2/ATP6V1B2/HLA-A/HLA-A/HLA-A/HLA-A/HLA-A/HLA-A/HLA-A/HLA-A/C1R/C1R/TUBB3/ATP6V1G2/ATP6V1G2/ATP6V1G2/ATP6V1G2/ATP6V1G2/ATP6V1G2/ATP6V1G2/RAB7A/RAC1/CYBA/ATP6V1A/ATP6V0E2/ATP6V0…	52	R-HSA-72706	GTP hydrolysis and joining of the 60S ribosomal subunit	74/1351	112/10704	4.78587e-40	1.29984e-37	8.32238e-38	RPS2/RPS19/RPL13/RPSA/UBA52/RPL4/RPS28/RPS6/RPL13A/RPS18/RPL28/RPLP1/RPL39/RPL29/RPLP0/RPL37A/RPL7A/RPS17/EIF4A2/RPL19/RPLP2/RPL17/RPS15/RPL31/RPS14/RPL24/RPL5/RPL11/RPL30/RPL15/RPL27A/RPL18/RPL23/RPS8/RPS23/RPL35/RPL32/RPS3/RPS9/EIF4H/RPS11/RPL18A/RPL27/RPL8/RPL34/RPL7/RPL10A/EIF5/RPS5/RPL6/RPS24/RPL22/RPL10/RPL36A/EIF4G1/RPL21/RPS3A/RPL9/RPL38/RPL3/RPL12/RPS16/RPL37/RPS27A/EIF3M/RPL14/EIF3B/RPS…	74
CRYAB	0	0.872105	0.994	0.929	0	0	GO:0072599	establishment of protein localization to endoplasmic reticulum	73/2012	124/18866	3.04809e-39	3.0359e-36	2.25345e-36	RPS2/RPS19/RPL13/RPSA/UBA52/RPL4/RPS28/RPS6/RPL13A/RPS18/RPL28/RPLP1/RPL39/RPL29/RPLP0/RPL37A/RPL7A/RPS17/RPL19/RPLP2/RPL17/RPS15/RPL31/RPS14/HSPA5/RPL24/RPL5/RPL11/RPL30/RPL15/RPL27A/RPL18/RPL23/RPS8/RPS23/RPL35/RPL32/RPS3/RPS9/RPS11/RPL18A/RPL27/RPL8/RPL34/RPL7/RPL10A/RPS5/RPL6/RPS24/RPL22/RPL10/RPL36A/RPL21/RPS3A/RPL9/RPL38/RPL3/RPL12/RPS16/RPL37/SPCS3/RPS27A/SEC61A2/GET1/RPL14/RPS12/SSR3/RPL2…	73	hsa05100	Bacterial invasion of epithelial cells	31/1041	77/8112	1.30962e-09	6.98465e-08	5.00873e-08	SEPTIN3/ACTB/DNM1/ARPC5/SEPTIN8/RAC1/PTK2/CLTC/CLTA/ARPC4/BCAR1/BCAR1/CDC42/ARPC3/ACTR3B/CTNNB1/PIK3R2/ACTR3/ARPC1B/CRKL/HCLS1/RHOG/CLTB/SEPTIN9/SEPTIN9/RHOA/ELMO2/SEPTIN2/CRK/ACTR2/ELMO1/DNM2/ARPC1A	31	R-HSA-72613	Eukaryotic Translation Initiation	75/1351	119/10704	1.99895e-38	3.87797e-36	2.48291e-36	RPS2/RPS19/RPL13/RPSA/UBA52/RPL4/RPS28/RPS6/RPL13A/RPS18/RPL28/RPLP1/RPL39/RPL29/RPLP0/RPL37A/RPL7A/RPS17/EIF4A2/RPL19/RPLP2/RPL17/RPS15/RPL31/RPS14/RPL24/RPL5/RPL11/RPL30/RPL15/RPL27A/RPL18/RPL23/RPS8/RPS23/RPL35/RPL32/RPS3/RPS9/EIF4H/RPS11/RPL18A/RPL27/RPL8/RPL34/RPL7/RPL10A/EIF5/RPS5/RPL6/RPS24/RPL22/RPL10/RPL36A/EIF4G1/RPL21/RPS3A/RPL9/RPL38/RPL3/RPL12/RPS16/RPL37/RPS27A/EIF3M/PABPC1/RPL14/EI…	75
GFAP	0	0.781262	1	1	0	0	GO:0006612	protein targeting to membrane	96/2012	210/18866	1.33486e-38	1.13959e-35	8.45879e-36	RPS2/RPS19/RPL13/RPSA/UBA52/RPL4/RPS28/PRNP/GDI1/RPS6/RPL13A/RPS18/RPL28/RPLP1/RPL39/RPL29/HPCA/RPLP0/RPL37A/RPL7A/RPS17/ARL6IP1/ITGB2/RPL19/PAK1/RPLP2/RPL17/RPS15/RPL31/RPS14/HSPA5/RPL24/RPL5/RPL11/RPL30/RPL15/RPL27A/RPL18/RPL23/RPS8/RPS23/RPL35/CDK5R1/RPL32/RPS3/RTP5/RPS9/RPS11/RPL18A/RPL27/RPL8/HRAS/RPL34/RPL7/RPL10A/RPS5/RPL6/GOLGA7B/RPS24/RPL22/ZDHHC9/RPL10/ANK3/ZDHHC23/RPL36A/CHP1/RPL21/GOL…	96	hsa04141	Protein processing in endoplasmic reticulum	51/1041	171/8112	2.61058e-09	1.19341e-07	8.55798e-08	CRYAB/HSP90AA1/HSPA1A/HSPA1A/HSPA1A/HSPA1A/HSPA1A/HSP90B1/HSP90AB1/HSPH1/CALR/DNAJA1/DNAJB2/CANX/CANX/PDIA6/HSPA5/TUSC3/DNAJB1/ERP29/RAD23B/BCAP31/HSPA8/PDIA3/ATF4/SKP1/HSPA2/SEL1L/HSPA1B/HSPA1B/HSPA1B/HSPA1B/HSPA1B/HYOU1/HYOU1/HSPA4L/DNAJC5/PRKCSH/MAN1A1/RPN2/STT3B/SEC61A2/RBX1/PDIA4/DERL1/HSPBP1/PREB/SSR3/UBE4B/P4HB/RPN1/SSR1/GANAB/HERPUD1/SAR1B/SVIP/SSR4/RNF5/RNF5/RNF5/RNF5/RNF5/RNF5/RNF5/UBXN…	51	R-HSA-72737	Cap-dependent Translation Initiation	75/1351	119/10704	1.99895e-38	3.87797e-36	2.48291e-36	RPS2/RPS19/RPL13/RPSA/UBA52/RPL4/RPS28/RPS6/RPL13A/RPS18/RPL28/RPLP1/RPL39/RPL29/RPLP0/RPL37A/RPL7A/RPS17/EIF4A2/RPL19/RPLP2/RPL17/RPS15/RPL31/RPS14/RPL24/RPL5/RPL11/RPL30/RPL15/RPL27A/RPL18/RPL23/RPS8/RPS23/RPL35/RPL32/RPS3/RPS9/EIF4H/RPS11/RPL18A/RPL27/RPL8/RPL34/RPL7/RPL10A/EIF5/RPS5/RPL6/RPS24/RPL22/RPL10/RPL36A/EIF4G1/RPL21/RPS3A/RPL9/RPL38/RPL3/RPL12/RPS16/RPL37/RPS27A/EIF3M/PABPC1/RPL14/EI…	75
SPP1	0	0.729548	0.907	0.739	0	0	GO:0006413	translational initiation	90/2012	192/18866	2.44102e-37	1.82345e-34	1.35348e-34	HSPB1/RPS2/RPS19/RPL13/RPSA/UBA52/RPL4/RPS28/RPS6/RPL13A/RPS18/RPL28/RPLP1/RPL39/RPL29/RPLP0/RPL37A/RPL7A/EIF1/RPS17/EIF4A2/RPL19/UHMK1/RPLP2/RPL17/RPS15/RPL31/RPS14/RPL24/RPL5/RPL11/RPL30/RPL15/RPL27A/RPL18/EIF4G2/RPL23/RPS8/RPS23/RPL35/RPL32/RPS3/RPS9/EIF4H/RPS11/RPL18A/RPL27/RPL8/RPL34/RPL7/RPL10A/EIF5/ATF4/RPS5/RPL6/RPS24/RPL22/RPL10/RPL36A/EIF4G1/RPL21/RBM4/RPS3A/LARP1/RPL9/PPP1CA/RPL38/RPL3…	90	hsa04721	Synaptic vesicle cycle	30/1041	78/8112	8.69813e-09	3.47925e-07	2.49499e-07	SLC17A7/NSF/NSF/NSF/ATP6V0C/SYT1/STX1A/AP2M1/ATP6V1H/DNM1/ATP6V1B2/VAMP2/ATP6V1G2/ATP6V1G2/ATP6V1G2/ATP6V1G2/ATP6V1G2/ATP6V1G2/ATP6V1G2/STXBP1/ATP6V1A/CLTC/CLTA/ATP6V0E2/ATP6V0A1/ATP6V0B/ATP6V1C1/ATP6V1E1/ATP6V0D1/NAPA/ATP6V1F/AP2S1/AP2B1/CPLX3/ATP6V1D/CLTB/AP2A2/AP2A2/AP2A2/DNM2	30	R-HSA-192823	Viral mRNA Translation	64/1351	89/10704	2.75589e-38	4.67813e-36	2.99522e-36	RPS2/RPS19/RPL13/RPSA/UBA52/RPL4/RPS28/RPS6/RPL13A/RPS18/RPL28/RPLP1/RPL39/RPL29/RPLP0/RPL37A/RPL7A/RPS17/RPL19/RPLP2/RPL17/RPS15/RPL31/RPS14/RPL24/RPL5/RPL11/RPL30/RPL15/RPL27A/RPL18/RPL23/RPS8/RPS23/RPL35/RPL32/RPS3/RPS9/RPS11/RPL18A/RPL27/RPL8/RPL34/RPL7/RPL10A/RPS5/RPL6/RPS24/RPL22/RPL10/RPL36A/RPL21/RPS3A/RPL9/RPL38/RPL3/RPL12/RPS16/RPL37/RPS27A/RPL14/RPS12/RPL26/RPS20	64
C1QB	0	0.723122	0.853	0.611	0	0	GO:0070972	protein localization to endoplasmic reticulum	79/2012	152/18866	5.24362e-37	3.48177e-34	2.5844e-34	RPS2/RPS19/RPL13/RPSA/UBA52/RPL4/RTN4/RPS28/ANK2/RPS6/RPL13A/RPS18/RPL28/RPLP1/RPL39/RPL29/RPLP0/RPL37A/RPL7A/GJA1/RPS17/RPL19/RPLP2/RPL17/RPS15/RPL31/RPS14/HSPA5/RPL24/RPL5/RPL11/RPL30/RPL15/RPL27A/RPL18/RPL23/DDRGK1/RPS8/RPS23/RPL35/RPL32/RPS3/RPS9/RPS11/RPL18A/RPL27/RPL8/RPL34/RPL7/BCAP31/RPL10A/RPS5/RPL6/RPS24/RPL22/RPL10/RPL36A/VAPA/RPL21/RPS3A/RPL9/RPL38/RPL3/RPL12/RPS16/RPL37/SPCS3/RPS27A/…	79	hsa05131	Shigellosis	63/1041	246/8112	2.78859e-08	9.91499e-07	7.11009e-07	C3/MAPK1/SEPTIN3/UBA52/ACTB/UBB/ARF1/ARPC5/PFN1/SEPTIN8/CD44/RAC1/MAPK3/PTK2/CAPNS1/UBC/VDAC1/SKP1/PRKCD/ARPC4/BCAR1/BCAR1/HK1/CDC42/BTRC/ARPC3/ACTR3B/PPID/SEPTIN7/GABARAPL1/BNIP3/PIK3R2/GABARAP/SQSTM1/SQSTM1/ACTR3/ARPC1B/CRKL/UBE2N/HCLS1/JUN/PLCD3/RPS27A/SEPTIN9/SEPTIN9/RBX1/TLN2/ARHGEF2/RHOA/ELMO2/FNBP1/SEPTIN2/CRK/PRKCE/ACTR2/BCL2L1/MDM2/MAPK14/ELMO1/FBXW11/TLN1/MYL12B/MYL9/CYTH1/ARPC1A/UBE2D2	63	R-HSA-975956	Nonsense Mediated Decay (NMD) independent of the Exon Junction Complex (EJC)	66/1351	95/10704	6.22481e-38	9.39255e-36	6.01368e-36	RPS2/RPS19/RPL13/RPSA/UBA52/RPL4/RPS28/RPS6/RPL13A/RPS18/RPL28/RPLP1/RPL39/RPL29/RPLP0/RPL37A/RPL7A/RPS17/RPL19/RPLP2/RPL17/RPS15/RPL31/RPS14/RPL24/RPL5/RPL11/RPL30/RPL15/RPL27A/RPL18/RPL23/RPS8/RPS23/RPL35/RPL32/RPS3/RPS9/RPS11/RPL18A/RPL27/RPL8/RPL34/RPL7/RPL10A/RPS5/RPL6/RPS24/RPL22/RPL10/RPL36A/EIF4G1/RPL21/RPS3A/RPL9/RPL38/RPL3/RPL12/RPS16/RPL37/RPS27A/PABPC1/RPL14/RPS12/RPL26/RPS20	66
HSPB1	0	0.667363	0.952	0.931	0	0	GO:0090150	establishment of protein localization to membrane	123/2012	342/18866	3.64366e-36	2.17745e-33	1.61625e-33	HSP90AA1/YWHAZ/YWHAH/CALM3/RPS2/RPS19/RPL13/NSF/RPSA/YWHAB/UBA52/YWHAG/RPL4/YWHAE/RPS28/PRNP/GDI1/RPS6/RPL13A/RPS18/CLSTN1/RPL28/RPLP1/RPL39/RPL29/HPCA/YWHAQ/RPLP0/ATP1B1/RPL37A/RPL7A/SPTBN1/RPS17/ARL6IP1/ITGB2/RPL19/PAK1/RPLP2/RPL17/RPS15/RPL31/RPS14/HSPA5/RPL24/RPL5/RPL11/VAMP2/RPL30/RPL15/RPL27A/RPL18/RPL23/CD24/RACK1/RPS8/RPS23/RPL35/CDK5R1/RPL32/RPS3/HSPA4/RTP5/RPS9/RPS11/RPL18A/RPL27/RPL8/H…	123	hsa04720	Long-term potentiation	26/1041	67/8112	6.91534e-08	2.21291e-06	1.58689e-06	MAPK1/CALM3/CAMK2D/PRKCG/MAP2K1/CALM1/CALM2/GRIA1/PPP3CB/MAPK3/HRAS/HRAS/GRIN2B/ATF4/PRKACB/GRIA2/PPP1CA/PPP1CC/GNAQ/ADCY1/GRIN1/PPP1CB/GRM5/CAMK2B/RPS6KA2/PPP3R1/RAP1A	26	R-HSA-72689	Formation of a pool of free 40S subunits	68/1351	101/10704	1.11852e-37	1.51894e-35	9.7252e-36	RPS2/RPS19/RPL13/RPSA/UBA52/RPL4/RPS28/RPS6/RPL13A/RPS18/RPL28/RPLP1/RPL39/RPL29/RPLP0/RPL37A/RPL7A/RPS17/RPL19/RPLP2/RPL17/RPS15/RPL31/RPS14/RPL24/RPL5/RPL11/RPL30/RPL15/RPL27A/RPL18/RPL23/RPS8/RPS23/RPL35/RPL32/RPS3/RPS9/RPS11/RPL18A/RPL27/RPL8/RPL34/RPL7/RPL10A/RPS5/RPL6/RPS24/RPL22/RPL10/RPL36A/RPL21/RPS3A/RPL9/RPL38/RPL3/RPL12/RPS16/RPL37/RPS27A/EIF3M/RPL14/EIF3B/RPS12/RPL26/EIF3E/RPS20/EIF1…	68
TF	0	0.622794	0.62	0.276	0	0	GO:0006402	mRNA catabolic process	123/2012	376/18866	1.51337e-31	8.22174e-29	6.10273e-29	HSPB1/HSPA1A/YWHAZ/RPS2/RPS19/RPL13/RPSA/YWHAB/UBA52/RPL4/UBB/RPS28/RPS6/RPL13A/RPS18/RPL28/RPLP1/RPL39/RPL29/HNRNPC/RPLP0/RPL37A/RPL7A/XPO1/RPS17/RPL19/RPLP2/RPL17/RPS15/RPL31/RPS14/RPL24/RPL5/RPL11/RPL30/RPL15/RPL27A/RPL18/RPL23/RPS8/RPS23/RPL35/RPL32/RPS3/RPS9/RPS11/RPL18A/RPL27/YBX1/RPL8/RPL34/RPL7/UBC/HSPA8/RPL10A/PPP2CA/PRKCD/RPS5/RPL6/RPS24/FXR1/RPL22/RPL10/SET/RPL36A/DHX9/EIF4G1/RPL21/HSP…	123	hsa04728	Dopaminergic synapse	39/1041	132/8112	2.59629e-07	7.55284e-06	5.41618e-06	CALM3/CAMK2D/PRKCG/GNAO1/CALM1/CALM2/GRIA1/GNG2/MAOB/PPP3CB/PPP2CB/PPP2R2C/CALY/PPP2CA/KIF5C/KIF5C/GRIN2B/ATF4/ARRB2/GNG7/PRKACB/GNG3/KCNJ9/GNB1/GRIA2/GNAI1/PPP1CA/PPP1CC/PPP2R1A/GNAL/GNAQ/GRIA3/PPP1CB/ADCY5/CAMK2B/COMT/MAPK14/KIF5B/PPP2R5C/PPP2R2B	39	R-HSA-72764	Eukaryotic Translation Termination	65/1351	93/10704	1.25104e-37	1.54447e-35	9.8886e-36	RPS2/RPS19/RPL13/RPSA/UBA52/RPL4/RPS28/RPS6/RPL13A/RPS18/RPL28/RPLP1/RPL39/RPL29/RPLP0/RPL37A/RPL7A/RPS17/RPL19/RPLP2/RPL17/RPS15/RPL31/RPS14/RPL24/RPL5/RPL11/RPL30/RPL15/RPL27A/RPL18/RPL23/RPS8/RPS23/RPL35/RPL32/RPS3/RPS9/RPS11/RPL18A/RPL27/RPL8/RPL34/RPL7/RPL10A/RPS5/RPL6/RPS24/RPL22/RPL10/RPL36A/RPL21/RPS3A/RPL9/RPL38/RPL3/RPL12/RPS16/RPL37/TRMT112/RPS27A/RPL14/RPS12/RPL26/RPS20	65
C1QA	0	0.615249	0.703	0.316	0	0	GO:0006401	RNA catabolic process	127/2012	415/18866	2.28295e-29	1.13691e-26	8.43892e-27	HSPB1/HSPA1A/YWHAZ/RPS2/RPS19/RPL13/RPSA/YWHAB/UBA52/RPL4/UBB/RPS28/RPS6/RPL13A/RPS18/RPL28/RPLP1/RPL39/RPL29/HNRNPC/RPLP0/RPL37A/RPL7A/XPO1/RPS17/RPL19/RPLP2/RPL17/RPS15/RPL31/RPS14/RNASET2/RPL24/RPL5/RPL11/RPL30/RPL15/RPL27A/RPL18/RPL23/RPS8/RPS23/RPL35/RPL32/RPS3/RPS9/RPS11/RPL18A/RPL27/YBX1/RPL8/RPL34/RPL7/UBC/HSPA8/RPL10A/PPP2CA/PRKCD/RPS5/RPL6/RPS24/FXR1/RPL22/RPL10/SET/RPL36A/DHX9/EIF4G1/R…	127	hsa04142	Lysosome	38/1041	128/8112	3.22499e-07	8.59997e-06	6.16709e-06	CTSB/CTSB/CTSD/ATP6V0C/IDS/PSAP/ABCA2/ATP6AP1/CD63/ATP6V1H/LAMP2/LAPTM5/LIPA/CLTC/AP3S1/CLTA/ATP6V0A1/ATP6V0B/NPC2/ATP6V0D1/LAMP1/CD68/SORT1/CD164/CTSS/GBA/GBA/AP3B2/CTSA/AP3M2/PPT1/M6PR/LGMN/GNPTAB/CLTB/SMPD1/TPP1/ASAH1/AP1S1/GNPTG	38	R-HSA-376176	Signaling by ROBO receptors	103/1351	218/10704	7.71426e-37	8.72997e-35	5.58945e-35	RPS2/RPS19/RPL13/RPSA/UBA52/RPL4/UBB/RPS28/SLIT1/RPS6/RPL13A/RPS18/RPL28/RPLP1/RPL39/RPL29/RPLP0/RPL37A/RPL7A/RPS17/PPP3CB/RPL19/PAK1/RPLP2/RPL17/RPS15/RPL31/RPS14/RPL24/RPL5/RPL11/RPL30/PFN1/RPL15/RPL27A/RPL18/SLIT3/RPL23/CAP2/RPS8/RPS23/RPL35/RPL32/RPS3/RPS9/RPS11/RPL18A/RAC1/RPL27/RPL8/RPL34/RPL7/NELL2/UBC/RPL10A/RPS5/RPL6/EVL/PRKACB/RPS24/RPL22/RPL10/CLASP2/RPL36A/CDC42/PAK3/EIF4G1/RPL21/ELOB…	103
QDPR	0	0.611102	0.929	0.796	0	0	GO:0019083	viral transcription	76/2012	178/18866	2.21059e-28	9.55634e-26	7.09336e-26	RPS2/RPS19/RPL13/RPSA/UBA52/RPL4/RPS28/RPS6/RPL13A/RPS18/RPL28/RPLP1/RPL39/RPL29/RPLP0/RPL37A/RPL7A/RPS17/POLR2L/RPL19/RPLP2/RPL17/RPS15/RPL31/RPS14/RPL24/RPL5/RPL11/RPL30/RPL15/RPL27A/RPL18/RPL23/RPS8/RPS23/RPL35/RPL32/RPS3/RPS9/RPS11/RPL18A/RPL27/RPL8/RPL34/RPL7/RPL10A/RPS5/RPL6/RPS24/RPL22/RPL10/RPL36A/DHX9/IFITM3/RPL21/TRIM8/RPS3A/RPL9/RPL38/RPL3/POLR2F/RPL12/RPS16/RPL37/JUN/RPS27A/RPL14/NUCK…	76	hsa04666	Fc gamma R-mediated phagocytosis	31/1041	97/8112	6.69375e-07	1.64769e-05	1.18157e-05	MAPK1/PRKCG/MAP2K1/BIN1/CFL1/PAK1/MARCKSL1/ARPC5/MARCKS/RAC1/MAPK3/PRKCD/ARPC4/FCGR3A/CDC42/PLPP2/ARPC3/ACTR3B/PIK3R2/AMPH/PIP5K1C/ACTR3/ARPC1B/CRKL/CFL2/PLA2G4C/CRK/PRKCE/ACTR2/DNM2/ARPC1A	31	R-HSA-2408557	Selenocysteine synthesis	64/1351	93/10704	2.03831e-36	2.12925e-34	1.36327e-34	RPS2/RPS19/RPL13/RPSA/UBA52/RPL4/RPS28/RPS6/RPL13A/RPS18/RPL28/RPLP1/RPL39/RPL29/RPLP0/RPL37A/RPL7A/RPS17/RPL19/RPLP2/RPL17/RPS15/RPL31/RPS14/RPL24/RPL5/RPL11/RPL30/RPL15/RPL27A/RPL18/RPL23/RPS8/RPS23/RPL35/RPL32/RPS3/RPS9/RPS11/RPL18A/RPL27/RPL8/RPL34/RPL7/RPL10A/RPS5/RPL6/RPS24/RPL22/RPL10/RPL36A/RPL21/RPS3A/RPL9/RPL38/RPL3/RPL12/RPS16/RPL37/RPS27A/RPL14/RPS12/RPL26/RPS20	64
MOBP	0	0.59522	0.652	0.289	0	0	GO:0019080	viral gene expression	80/2012	195/18866	2.23877e-28	9.55634e-26	7.09336e-26	RPS2/RPS19/RPL13/RPSA/UBA52/RPL4/RPS28/RPS6/RPL13A/RPS18/RPL28/RPLP1/RPL39/RPL29/RPLP0/RPL37A/RPL7A/RPS17/POLR2L/RPL19/RPLP2/RPL17/RPS15/RPL31/RPS14/RPL24/RPL5/RPL11/RPL30/RPL15/RPL27A/RPL18/RPL23/RPS8/RPS23/RPL35/RPL32/RPS3/RPS9/RPS11/RPL18A/RPL27/RPL8/RPL34/RPL7/PCBP2/RPL10A/RPS5/RPL6/RPS24/RPL22/RPL10/RPL36A/DHX9/IFITM3/RPL21/TRIM8/RPS3A/RPL9/RPL38/RPL3/POLR2F/RPL12/RPS16/RPL37/SPCS3/JUN/RPS27…	80	hsa04961	Endocrine and other factor-regulated calcium reabsorption	21/1041	53/8112	8.40123e-07	1.86475e-05	1.33722e-05	ATP2B4/PRKCG/ATP1A3/SLC8A2/ATP1B1/AP2M1/ATP1B2/DNM1/ATP1A2/CLTC/CLTA/PRKACB/AP2S1/AP2B1/GNAQ/CALB1/CLTB/ATP2B3/ATP2B1/AP2A2/AP2A2/AP2A2/DNM2	21	R-HSA-927802	Nonsense-Mediated Decay (NMD)	71/1351	115/10704	1.44624e-35	1.30933e-33	8.38312e-34	RPS2/RPS19/RPL13/RPSA/UBA52/RPL4/RPS28/RPS6/RPL13A/RPS18/RPL28/RPLP1/RPL39/RPL29/RPLP0/RPL37A/RPL7A/RPS17/RPL19/RPLP2/RPL17/RPS15/RPL31/RPS14/RPL24/RPL5/RPL11/RPL30/RPL15/RPL27A/RPL18/RPL23/RPS8/RPS23/RPL35/RPL32/RPS3/RPS9/RPS11/RPL18A/RPL27/RPL8/RPL34/RPL7/RPL10A/PPP2CA/RPS5/RPL6/RPS24/RPL22/RPL10/RPL36A/EIF4G1/RPL21/RPS3A/RPL9/RPL38/RPL3/RPL12/RPS16/PPP2R1A/CASC3/RPL37/RPS27A/PABPC1/RPL14/RPS12…	71
C3	0	0.577818	0.747	0.322	0	0	GO:0050804	modulation of chemical synaptic transmission	132/2012	454/18866	4.66114e-28	1.857e-25	1.37839e-25	NPTXR/NPTX1/BAIAP3/SNCA/YWHAH/SYP/MAPK1/CNTN2/CLSTN2/CALM3/SNCG/PRKCG/APP/NAPB/APOE/YWHAG/SYT1/STX1A/PRNP/GRIA1/ARF1/SLC8A2/CLSTN1/SYN1/CNIH2/ATP2A2/CX3CL1/NSMF/PPP3CB/DNM1/ATP1A2/TYROBP/KCNMB4/NEUROD2/SYNGR1/CACNG3/SYNPO/VAMP2/MAPT/STXBP1/NPTN/NPTX2/DGKZ/RAB3B/RGS14/HRAS/ABR/PXK/NCS1/BACE1/PCDH17/SHISA9/PHF24/GRIN2B/ATF4/FAM107A/GIT1/NAPA/ARRB2/TNR/PTPRA/KAT2A/LRRTM1/CA2/BAIAP2/APBA1/PRKCZ/PTEN/…	132	hsa04810	Regulation of actin cytoskeleton	54/1041	218/8112	8.74101e-07	1.86475e-05	1.33722e-05	PIP4K2A/TMSB4X/MAPK1/MAP2K1/ACTB/CFL1/LPAR1/ITGB2/PAK1/ARPC5/PFN1/CYFIP2/PIP4K2B/PIP4K2B/RAC1/MAPK3/PTK2/HRAS/HRAS/FGF1/ITGB4/CHRM1/GIT1/ARPC4/BCAR1/BCAR1/BAIAP2/CDC42/PAK3/ARPC3/PPP1CA/ACTR3B/PPP1CC/PIK3R2/ABI2/PIP5K1C/ACTR3/ARPC1B/CRKL/NCKAP1/PPP1CB/CFL2/GNA12/RDX/BRK1/RHOA/FGFR2/ENAH/CRK/ITGB8/APC2/ARHGAP35/ACTR2/MYL12B/MYL9/ARPC1A/MYH9	54	R-HSA-975957	Nonsense Mediated Decay (NMD) enhanced by the Exon Junction Complex (EJC)	71/1351	115/10704	1.44624e-35	1.30933e-33	8.38312e-34	RPS2/RPS19/RPL13/RPSA/UBA52/RPL4/RPS28/RPS6/RPL13A/RPS18/RPL28/RPLP1/RPL39/RPL29/RPLP0/RPL37A/RPL7A/RPS17/RPL19/RPLP2/RPL17/RPS15/RPL31/RPS14/RPL24/RPL5/RPL11/RPL30/RPL15/RPL27A/RPL18/RPL23/RPS8/RPS23/RPL35/RPL32/RPS3/RPS9/RPS11/RPL18A/RPL27/RPL8/RPL34/RPL7/RPL10A/PPP2CA/RPS5/RPL6/RPS24/RPL22/RPL10/RPL36A/EIF4G1/RPL21/RPS3A/RPL9/RPL38/RPL3/RPL12/RPS16/PPP2R1A/CASC3/RPL37/RPS27A/PABPC1/RPL14/RPS12…	71
FTL	0	0.550856	1	1	0	0	GO:0099177	regulation of trans-synaptic signaling	132/2012	455/18866	5.90259e-28	2.20462e-25	1.63642e-25	NPTXR/NPTX1/BAIAP3/SNCA/YWHAH/SYP/MAPK1/CNTN2/CLSTN2/CALM3/SNCG/PRKCG/APP/NAPB/APOE/YWHAG/SYT1/STX1A/PRNP/GRIA1/ARF1/SLC8A2/CLSTN1/SYN1/CNIH2/ATP2A2/CX3CL1/NSMF/PPP3CB/DNM1/ATP1A2/TYROBP/KCNMB4/NEUROD2/SYNGR1/CACNG3/SYNPO/VAMP2/MAPT/STXBP1/NPTN/NPTX2/DGKZ/RAB3B/RGS14/HRAS/ABR/PXK/NCS1/BACE1/PCDH17/SHISA9/PHF24/GRIN2B/ATF4/FAM107A/GIT1/NAPA/ARRB2/TNR/PTPRA/KAT2A/LRRTM1/CA2/BAIAP2/APBA1/PRKCZ/PTEN/…	132	hsa05110	Vibrio cholerae infection	20/1041	50/8112	1.2828e-06	2.5656e-05	1.8398e-05	ATP6V0C/ACTB/ARF1/ATP6AP1/ATP6V1H/ATP6V1B2/ATP6V1G2/ATP6V1G2/ATP6V1G2/ATP6V1G2/ATP6V1G2/ATP6V1G2/ATP6V1G2/ATP6V1A/ATP6V0E2/ATP6V0A1/ATP6V0B/ATP6V1C1/ATP6V1E1/ATP6V0D1/PRKACB/ATP6V1F/ATP6V1D/SEC61A2/PDIA4/SLC12A2	20	R-HSA-168255	Influenza Infection	83/1351	156/10704	1.12186e-34	9.52177e-33	6.09642e-33	HSP90AA1/HSPA1A/CALR/RPS2/RPS19/RPL13/CANX/RPSA/UBA52/RPL4/RPS28/RPS6/RPL13A/RPS18/RPL28/RPLP1/RPL39/RPL29/RPLP0/RPL37A/RPL7A/XPO1/RPS17/POLR2L/RPL19/RPLP2/RPL17/RPS15/RPL31/RPS14/RPL24/RPL5/RPL11/RPL30/RPL15/RPL27A/RPL18/RPL23/RPS8/RPS23/RPL35/RPL32/RPS3/RPS9/RPS11/RPL18A/RPL27/CLTC/RPL8/RPL34/RPL7/CLTA/RPL10A/RPS5/RPL6/RPS24/RPL22/RPL10/RPL36A/RAN/RPL21/HSPA1B/RPS3A/RPL9/RPL38/RPL3/POLR2F/RPL12…	83
PEA15	0	0.54931	1	0.993	0	0	GO:0000956	nuclear-transcribed mRNA catabolic process	82/2012	210/18866	2.74888e-27	9.66312e-25	7.17262e-25	RPS2/RPS19/RPL13/RPSA/UBA52/RPL4/RPS28/RPS6/RPL13A/RPS18/RPL28/RPLP1/RPL39/RPL29/RPLP0/RPL37A/RPL7A/RPS17/RPL19/RPLP2/RPL17/RPS15/RPL31/RPS14/RPL24/RPL5/RPL11/RPL30/RPL15/RPL27A/RPL18/RPL23/RPS8/RPS23/RPL35/RPL32/RPS3/RPS9/RPS11/RPL18A/RPL27/RPL8/RPL34/RPL7/RPL10A/PPP2CA/RPS5/RPL6/RPS24/RPL22/RPL10/RPL36A/EIF4G1/RPL21/RPS3A/RPL9/RPL38/RPL3/RPL12/RPS16/PPP2R1A/DDX5/CASC3/RPL37/HBS1L/CNOT7/RPS27A/P…	82	hsa05031	Amphetamine addiction	24/1041	69/8112	2.26699e-06	4.26728e-05	3.06009e-05	CALM3/CAMK2D/PRKCG/CALM1/CALM2/STX1A/GRIA1/MAOB/PPP3CB/PDYN/GRIN2B/ATF4/PRKACB/GRIA2/PPP1CA/PPP1CC/GRIA3/GRIN1/JUN/PPP1CB/ADCY5/CAMK2B/PPP3R1/HDAC2	24	R-HSA-9633012	Response of EIF2AK4 (GCN2) to amino acid deficiency	65/1351	101/10704	3.02487e-34	2.41634e-32	1.54709e-32	RPS2/RPS19/RPL13/RPSA/UBA52/RPL4/RPS28/RPS6/RPL13A/RPS18/RPL28/RPLP1/RPL39/RPL29/RPLP0/RPL37A/RPL7A/RPS17/RPL19/RPLP2/RPL17/RPS15/RPL31/RPS14/RPL24/RPL5/RPL11/RPL30/RPL15/RPL27A/RPL18/RPL23/RPS8/RPS23/RPL35/RPL32/RPS3/RPS9/RPS11/RPL18A/RPL27/RPL8/RPL34/RPL7/RPL10A/ATF4/RPS5/RPL6/RPS24/RPL22/RPL10/RPL36A/RPL21/RPS3A/RPL9/RPL38/RPL3/RPL12/RPS16/RPL37/RPS27A/RPL14/RPS12/RPL26/RPS20	65
TUBA1A	0	0.542208	1	0.984	0	0	GO:0050808	synapse organization	125/2012	433/18866	2.65011e-26	8.79837e-24	6.53074e-24	C1QB/C1QA/C3/TUBA1A/C1QC/SNCA/YWHAZ/CNTN2/CLSTN2/SNCG/APP/TUBB/APOE/ACTB/GPM6A/SLIT1/CFL1/PRNP/ARF1/SLC8A2/CLSTN1/SYN1/CAMKV/CX3CL1/DCTN1/NEUROD2/SEMA4D/GAP43/SYNPO/NEFL/PFN1/KIF1A/MAPT/CTNND2/ADGRL3/CDK5R1/NRCAM/NFASC/NPTN/SRCIN1/DBNL/PAFAH1B1/PTK2/CAMK1/PCDH17/HSPA8/FARP1/OPA1/GRIN2B/TNR/SEMA4A/BSN/PLXNB1/TREM2/LRRTM1/NDRG1/BAIAP2/ANK3/SEMA3E/NRXN2/BCAN/ERC2/CDC42/CDH8/PAK3/EIF4G1/PTEN/PALM/NEC…	125	hsa05120	Epithelial cell signaling in Helicobacter pylori infection	24/1041	70/8112	3.0364e-06	5.39805e-05	3.87097e-05	ATP6V0C/ATP6AP1/ATP6V1H/PAK1/ATP6V1B2/PTPRZ1/ATP6V1G2/ATP6V1G2/ATP6V1G2/ATP6V1G2/ATP6V1G2/ATP6V1G2/ATP6V1G2/JAM3/RAC1/ATP6V1A/ATP6V0E2/ATP6V0A1/ATP6V0B/ATP6V1C1/ATP6V1E1/ATP6V0D1/GIT1/CDC42/ATP6V1F/ATP6V1D/JUN/MAPK14/ADAM10/MAP2K4	24	R-HSA-9010553	Regulation of expression of SLITs and ROBOs	85/1351	171/10704	1.34474e-32	1.01453e-30	6.49563e-31	RPS2/RPS19/RPL13/RPSA/UBA52/RPL4/UBB/RPS28/SLIT1/RPS6/RPL13A/RPS18/RPL28/RPLP1/RPL39/RPL29/RPLP0/RPL37A/RPL7A/RPS17/RPL19/RPLP2/RPL17/RPS15/RPL31/RPS14/RPL24/RPL5/RPL11/RPL30/RPL15/RPL27A/RPL18/RPL23/RPS8/RPS23/RPL35/RPL32/RPS3/RPS9/RPS11/RPL18A/RPL27/RPL8/RPL34/RPL7/UBC/RPL10A/RPS5/RPL6/RPS24/RPL22/RPL10/RPL36A/EIF4G1/RPL21/ELOB/RPS3A/RPL9/RPL38/RPL3/PSMB4/RPL12/RPS16/CASC3/RPL37/RPS27A/PABPC1/R…	85
SLC17A7	0	0.540002	1	0.986	0	0	GO:0022604	regulation of cell morphogenesis	134/2012	499/18866	8.12297e-25	2.47949e-22	1.84044e-22	SPP1/ERMN/YWHAH/THY1/CNTN2/CPNE6/CALR/MAP2K1/APOE/SYT1/DPYSL2/RTN4/CFL1/MAG/S100A10/ENPP2/LPAR1/GDI1/LINGO1/CORO1A/SHTN1/MAP2/SEMA3D/NSMF/ITGB2/PAK1/ARHGDIA/RTN4R/SEMA4D/NEFL/KIF1A/MAPT/CDK5R1/CAPZB/NRCAM/SRCIN1/CD44/RAC1/DBNL/PAFAH1B1/PTK2/CHN1/RUFY3/CSF1R/OPA1/RAB21/FMNL2/TNR/SEMA4F/SEMA4A/PLXNB1/CDC42SE2/PREX1/SYT17/BAIAP2/SEMA3E/CDC42/VEGFA/PAK3/PTEN/PALM/CFDP1/DOCK5/ZEB2/EFNB3/WDR1/RHOU/RASA…	134	hsa04530	Tight junction	43/1041	169/8112	5.46299e-06	9.20083e-05	6.59796e-05	TUBA1A/CLDN11/TUBA1B/ACTB/PPP2CB/MYL6/SYNPO/ARPC5/PPP2R2C/JAM3/HSPA4/RAC1/MPDZ/PPP2CA/ARPC4/PRKACB/CDC42/PRKCZ/ARPC3/DLG2/ACTR3B/DLG1/PPP2R1A/EPB41L4B/ACTR3/ARPC1B/RAB8B/HCLS1/JUN/TUBA4A/NEDD4L/ARHGEF2/RDX/RHOA/PRKAG2/PRKCE/ACTR2/MYL12B/MYL9/RAP1A/ARPC1A/PPP2R2B/MYH9	43	R-HSA-2408522	Selenoamino acid metabolism	66/1351	118/10704	1.6669e-29	1.1914e-27	7.62804e-28	RPS2/RPS19/RPL13/RPSA/UBA52/RPL4/RPS28/RPS6/RPL13A/RPS18/RPL28/RPLP1/RPL39/RPL29/RPLP0/RPL37A/RPL7A/RPS17/RPL19/RPLP2/RPL17/RPS15/RPL31/RPS14/RPL24/RPL5/RPL11/RPL30/RPL15/RPL27A/RPL18/RPL23/RPS8/RPS23/RPL35/RPL32/RPS3/RPS9/RPS11/RPL18A/RPL27/RPL8/RPL34/RPL7/RPL10A/RPS5/RPL6/RPS24/RPL22/RPL10/RPL36A/RPL21/RPS3A/RPL9/RPL38/RPL3/RPL12/RPS16/RPL37/RPS27A/RPL14/RPS12/RPL26/PAPSS1/AHCY/RPS20	66
SYN2	0	0.522539	0.992	0.917	0	0	GO:0007409	axonogenesis	131/2012	482/18866	8.29815e-25	2.47949e-22	1.84044e-22	SPP1/CNP/HSP90AA1/NPTX1/PLPPR4/THY1/MAPK1/CNTN2/HSP90AB1/NCAM1/STMN1/MAP2K1/APP/UCHL1/APOE/ACTB/DPYSL2/RTN4/SLIT1/MAG/GDI1/LINGO1/SHTN1/MAP2/SPTBN1/APBB1/SEMA3D/PPP3CB/PAK1/ARHGDIA/RTN4R/SEMA4D/COBL/GAP43/NEFL/SLIT3/TUBB3/MAPT/FEZ1/PTPRZ1/STXBP1/RAP1GAP/CDK5R1/NRCAM/NFASC/NPTN/RAC1/DBNL/PAFAH1B1/MAPK3/PTK2/BSG/CHN1/RUFY3/NUMBL/CSF1R/ATP8A2/KIF5C/SPTAN1/MATN2/RAB21/TNR/EVL/SEMA4F/DPYSL5/SEMA4A/PTP…	131	hsa04962	Vasopressin-regulated water reabsorption	17/1041	44/8112	1.39228e-05	0.000222765	0.000159746	NSF/NSF/NSF/DYNLL1/AQP4/ARHGDIA/DCTN1/VAMP2/ARHGDIG/DYNLL2/PRKACB/ARHGDIB/DYNC1LI2/DCTN5/DYNC1H1/RAB5B/STX4/DYNC1I1/RAB5A	17	R-HSA-168273	Influenza Viral RNA Transcription and Replication	71/1351	135/10704	2.20552e-29	1.49754e-27	9.58819e-28	HSP90AA1/RPS2/RPS19/RPL13/RPSA/UBA52/RPL4/RPS28/RPS6/RPL13A/RPS18/RPL28/RPLP1/RPL39/RPL29/RPLP0/RPL37A/RPL7A/RPS17/POLR2L/RPL19/RPLP2/RPL17/RPS15/RPL31/RPS14/RPL24/RPL5/RPL11/RPL30/RPL15/RPL27A/RPL18/RPL23/RPS8/RPS23/RPL35/RPL32/RPS3/RPS9/RPS11/RPL18A/RPL27/RPL8/RPL34/RPL7/RPL10A/RPS5/RPL6/RPS24/RPL22/RPL10/RPL36A/RPL21/RPS3A/RPL9/RPL38/RPL3/POLR2F/RPL12/RPS16/RPL37/RPS27A/RPL14/PARP1/RPS12/RPL26…	71
CD74	0	0.520926	0.937	0.784	0	0	GO:0099003	vesicle-mediated transport in synapse	78/2012	220/18866	6.93916e-23	1.93393e-20	1.43549e-20	SLC17A7/SYN2/SNCA/SYP/CALM3/SNCG/PRKCG/SH3GL2/DNAJC6/CANX/NAPB/SYT1/ACTB/STX1A/CLSTN1/SYN1/HPCA/ATP2A2/PPP3CB/DNM1/SNAP91/VAMP2/STXBP1/CDK5R1/RAB3B/NCS1/BACE1/CALY/PCDH17/SV2A/PACSIN1/RAB27B/GIT1/NAPA/SYT5/BSN/SYNJ2/SYT17/APBA1/ERC2/PICALM/PTEN/AP2B1/DTNBP1/NLGN2/CPLX3/DOC2A/CHRNB2/SYT4/CTNNB1/PRKAR1B/NLGN3/DNAJC5/AMPH/PIP5K1C/PREPL/BTBD9/STX4/SYNJ1/ADCY1/RAPGEF4/PSEN1/PCLO/DVL1/CADPS/KIAA1109/SY…	78	hsa05022	Pathways of neurodegeneration - multiple diseases	92/1041	475/8112	2.10948e-05	0.0003076	0.000220581	TUBA1A/SNCA/MAPK1/TUBA1B/CALM3/CAMK2D/PRKCG/TUBB4A/MAP2K1/APP/UCHL1/TUBB/TUBB/TUBB/TUBB/TUBB/TUBB/TUBB/TUBB/TUBB2A/UBA52/CALM1/UBB/SOD1/CALM2/STX1A/PRNP/GRIA1/NDUFS5/ATP2A2/PPP3CB/DCTN1/HSPA5/GPR37/NDUFA3/NDUFA3/NDUFA3/NDUFA3/NDUFA3/NDUFA3/NDUFA3/NDUFA3/NDUFA3/NDUFA3/NEFL/TUBB3/MAPT/MAPT/MAPT/CDK5R1/RAC1/PDYN/MAPK3/HRAS/HRAS/KLC1/CHRM1/UBC/VDAC1/KIF5C/KIF5C/GRIN2B/ATF4/DNAL4/UBA1/UQCR11/GRIA2/DCT…	92	R-HSA-72766	Translation	100/1351	291/10704	2.00953e-22	1.2995e-20	8.32017e-21	RPS2/RPS19/RPL13/RPSA/UBA52/RPL4/RPS28/RPS6/RPL13A/RPS18/RPL28/RPLP1/RPL39/RPL29/EEF1A1/RPLP0/RPL37A/RPL7A/EEF1B2/RPS17/EIF4A2/RPL19/RPLP2/RPL17/RPS15/RPL31/RPS14/RPL24/RPL5/RPL11/RPL30/RPL15/RPL27A/RPL18/RPL23/RPS8/RPS23/RPL35/RPL32/RPS3/RPS9/SEC11C/EIF4H/RPS11/RPL18A/RPL27/RPL8/RPL34/RPL7/EEF1A2/EEF1G/RPL10A/EIF5/RPS5/RPL6/RPS24/EEF2/RPL22/RPL10/RPL36A/EIF4G1/RPL21/RPS3A/RPL9/MRPL55/RPL38/RPL3/…	100
NUPR1	0	0.516566	0.709	0.423	0	0	GO:0010769	regulation of cell morphogenesis involved in differentiation	96/2012	310/18866	7.11955e-23	1.93393e-20	1.43549e-20	SPP1/YWHAH/THY1/CNTN2/CALR/MAP2K1/APOE/DPYSL2/RTN4/CFL1/MAG/S100A10/GDI1/LINGO1/SHTN1/MAP2/SEMA3D/NSMF/PAK1/ARHGDIA/RTN4R/SEMA4D/NEFL/KIF1A/MAPT/CDK5R1/NRCAM/SRCIN1/RAC1/DBNL/PAFAH1B1/PTK2/CHN1/RUFY3/OPA1/RAB21/TNR/SEMA4F/SEMA4A/PLXNB1/PREX1/BAIAP2/SEMA3E/CDC42/VEGFA/PAK3/PTEN/DOCK5/ZEB2/EFNB3/FEZF2/CHRNB2/DMTN/NLGN3/FLNA/SPART/ABI2/SEMA6B/PLXND1/CRKL/IFRD1/GRIN1/NEDD4L/PSEN1/METRN/PLXNC1/RHOA/CA…	96	hsa04261	Adrenergic signaling in cardiomyocytes	38/1041	150/8112	2.11475e-05	0.0003076	0.000220581	ATP2B4/MAPK1/CALM3/CAMK2D/CALM1/CALM2/ATP1A3/SLC8A2/ATP1B1/ATP2A2/ATP1B2/ATP1A2/PPP2CB/CACNG3/PPP2R2C/MAPK3/CACNA2D1/PPP2CA/ATF4/PRKACB/GNAI1/PPP1CA/TPM3/PPP1CC/PPP2R1A/CACNB1/GNAQ/ADCY1/PPP1CB/ADCY5/RAPGEF4/CAMK2B/ATP2B3/ATP2B1/MAPK14/TPM1/PPP2R5C/PPP2R2B	38	R-HSA-8868773	rRNA processing in the nucleus and cytosol	71/1351	194/10704	6.29041e-18	3.8829e-16	2.48607e-16	RPS2/RPS19/RPL13/RPSA/UBA52/RPL4/RPS28/RPS6/RPL13A/RPS18/RPL28/RPLP1/RPL39/RPL29/RPLP0/RPL37A/RPL7A/RPS17/RPL19/RPLP2/RPL17/RPS15/RPL31/RPS14/RPL24/RPL5/RPL11/RPL30/RPL15/RPL27A/RPL18/RPL23/RPS8/RPS23/RPL35/RPL32/RPS3/RPS9/RPS11/RPL18A/RPL27/RPL8/RPL34/RPL7/RPL10A/RPS5/RPL6/RPS24/RPL22/RPL10/RPL36A/RPL21/RPS3A/RPL9/RPL38/RPL3/NOP10/RPL12/RPS16/NCL/RPL37/TRMT112/RPS27A/RPL14/NOL9/NHP2/RPS12/RPL26/…	71
SOD2	0	0.513377	0.945	0.862	0	0	GO:0099504	synaptic vesicle cycle	72/2012	199/18866	8.11801e-22	2.10927e-19	1.56564e-19	SLC17A7/SYN2/SNCA/SYP/CALM3/SNCG/PRKCG/SH3GL2/DNAJC6/CANX/NAPB/SYT1/ACTB/STX1A/SYN1/ATP2A2/PPP3CB/DNM1/SNAP91/VAMP2/STXBP1/CDK5R1/RAB3B/NCS1/BACE1/PCDH17/SV2A/PACSIN1/RAB27B/GIT1/NAPA/SYT5/BSN/SYNJ2/SYT17/APBA1/ERC2/PICALM/PTEN/DTNBP1/NLGN2/CPLX3/DOC2A/CHRNB2/SYT4/CTNNB1/PRKAR1B/NLGN3/DNAJC5/AMPH/PIP5K1C/PREPL/BTBD9/STX4/SYNJ1/ADCY1/RAPGEF4/PSEN1/PCLO/DVL1/CADPS/KIAA1109/SYT7/CDK5/RAB5A/PPFIA2/RA…	72	hsa04612	Antigen processing and presentation	24/1041	78/8112	2.46786e-05	0.000343354	0.000246221	CD74/HSP90AA1/HSPA1A/HSPA1A/HSPA1A/HSPA1A/HSPA1A/HSP90AB1/CTSB/CTSB/CALR/HLA-DRA/HLA-DRA/HLA-DRA/HLA-DRA/HLA-DRA/HLA-DRA/HLA-DRA/CANX/CANX/B2M/B2M/HLA-B/HLA-B/HLA-B/HLA-B/HLA-B/HLA-B/HSPA5/HLA-A/HLA-A/HLA-A/HLA-A/HLA-A/HLA-A/HLA-A/HLA-A/HSPA4/HSPA8/PDIA3/HSPA2/HLA-DPB1/HLA-DPB1/HLA-DPB1/HLA-DPB1/HLA-DPB1/HLA-DPB1/HLA-DPB1/HLA-DPB1/HLA-DRB1/HLA-DRB1/HLA-DRB1/HLA-DRB1/HLA-DRB1/HLA-DRB1/HSPA1B/HSPA1…	24	R-HSA-6791226	Major pathway of rRNA processing in the nucleolus and cytosol	68/1351	184/10704	1.76647e-17	1.04299e-15	6.67784e-16	RPS2/RPS19/RPL13/RPSA/UBA52/RPL4/RPS28/RPS6/RPL13A/RPS18/RPL28/RPLP1/RPL39/RPL29/RPLP0/RPL37A/RPL7A/RPS17/RPL19/RPLP2/RPL17/RPS15/RPL31/RPS14/RPL24/RPL5/RPL11/RPL30/RPL15/RPL27A/RPL18/RPL23/RPS8/RPS23/RPL35/RPL32/RPS3/RPS9/RPS11/RPL18A/RPL27/RPL8/RPL34/RPL7/RPL10A/RPS5/RPL6/RPS24/RPL22/RPL10/RPL36A/RPL21/RPS3A/RPL9/RPL38/RPL3/RPL12/RPS16/NCL/RPL37/RPS27A/RPL14/NOL9/RPS12/RPL26/NOP56/RPS20/CSNK1E	68
CNP	0	0.508192	0.89	0.805	0	0	GO:0006457	protein folding	76/2012	230/18866	3.16975e-20	7.89268e-18	5.85848e-18	CRYAB/HSPB1/CD74/HSP90AA1/HSPA1A/HSP90B1/HSP90AB1/HSPH1/CALR/DNAJA1/DNAJB2/GNAO1/PTGES3/CANX/B2M/GNG2/HSPD1/PPIA/DNAJA4/PDIA6/FKBP1A/HSPE1/HSPA5/GNAZ/CLU/PPIB/DNAJB1/ERP29/RAD23B/HSPA8/PDIA3/BAG4/CHORDC1/GRN/HSPA2/GNB1/PDCD5/CCT5/VBP1/CRTAP/HSPA1B/GNAI1/HSPA9/HSPA4L/NUDC/PPID/PFDN6/ST13/TCP1/DNAJC5/FKBP4/PRKCSH/DNAJB4/PFDN5/MLEC/DNAJC7/SELENOF/CCT2/AHSA1/DNAJB6/PDIA4/DERL1/HSPBP1/QSOX1/P4HB/SACS/…	76	hsa04966	Collecting duct acid secretion	12/1041	27/8112	5.10321e-05	0.000680428	0.000487938	ATP6V0C/ATP6V1B2/ATP6V1G2/ATP6V1G2/ATP6V1G2/ATP6V1G2/ATP6V1G2/ATP6V1G2/ATP6V1G2/ATP6V1A/ATP6V0E2/ATP6V0A1/ATP6V1C1/ATP6V1E1/ATP6V0D1/CA2/ATP6V1F/ATP6V1D	12	R-HSA-72312	rRNA processing	71/1351	204/10704	1.43392e-16	8.1136e-15	5.19482e-15	RPS2/RPS19/RPL13/RPSA/UBA52/RPL4/RPS28/RPS6/RPL13A/RPS18/RPL28/RPLP1/RPL39/RPL29/RPLP0/RPL37A/RPL7A/RPS17/RPL19/RPLP2/RPL17/RPS15/RPL31/RPS14/RPL24/RPL5/RPL11/RPL30/RPL15/RPL27A/RPL18/RPL23/RPS8/RPS23/RPL35/RPL32/RPS3/RPS9/RPS11/RPL18A/RPL27/RPL8/RPL34/RPL7/RPL10A/RPS5/RPL6/RPS24/RPL22/RPL10/RPL36A/RPL21/RPS3A/RPL9/RPL38/RPL3/NOP10/RPL12/RPS16/NCL/RPL37/TRMT112/RPS27A/RPL14/NOL9/NHP2/RPS12/RPL26/…	71
HSP90AA1	0	0.495097	1	1	0	0	GO:0050770	regulation of axonogenesis	66/2012	186/18866	1.36876e-19	3.27189e-17	2.42862e-17	SPP1/THY1/CNTN2/MAP2K1/APOE/DPYSL2/RTN4/MAG/GDI1/LINGO1/SHTN1/MAP2/SEMA3D/PAK1/ARHGDIA/RTN4R/SEMA4D/NEFL/MAPT/CDK5R1/NRCAM/DBNL/PAFAH1B1/PTK2/CHN1/RUFY3/RAB21/TNR/SEMA4F/SEMA4A/PLXNB1/SEMA3E/VEGFA/PAK3/PTEN/ZEB2/EFNB3/FEZF2/SPART/SEMA6B/PLXND1/IFRD1/GRIN1/PSEN1/METRN/PLXNC1/RHOA/SYNGAP1/TRAK2/LRP1/CDKL5/POU3F2/ARHGAP35/CDK5/SLITRK1/ZSWIM8/BMPR2/PLXNA2/IST1/PLXNA1/MAP6/CDH2/L1CAM/OMG/DNM2/TUBB2B	66	hsa04114	Oocyte meiosis	33/1041	129/8112	5.90232e-05	0.000755497	0.000541771	YWHAZ/YWHAH/MAPK1/CALM3/CAMK2D/MAP2K1/YWHAB/YWHAG/CALM1/YWHAE/YWHAE/CALM2/YWHAQ/PPP3CB/PPP2CB/MAPK3/PPP2CA/SKP1/PRKACB/BTRC/CPEB2/PPP1CA/PPP1CC/PPP2R1A/ADCY1/PPP1CB/ADCY5/RBX1/CAMK2B/RPS6KA2/PPP3R1/MAPK14/FBXW11/PPP2R5C	33	R-HSA-373760	L1CAM interactions	49/1351	119/10704	4.18132e-15	2.27129e-13	1.45422e-13	TUBA1A/SCN3B/MAPK1/CNTN2/TUBA1B/NCAM1/TUBB4A/MAP2K1/SH3GL2/TUBB2A/ACTB/DPYSL2/ANK2/CNTN1/SHTN1/AP2M1/SPTBN1/PAK1/DNM1/GAP43/TUBB3/CD24/NRCAM/NFASC/RAC1/KCNQ2/MAPK3/CLTC/CLTA/HSPA8/SPTAN1/ANK3/AP2S1/AP2B1/NCAN/CHL1/SCN2B/DLG1/TUBA4A/ALCAM/RDX/RPS6KA2/CNTNAP1/RANBP9/AP2A2/CSNK2A1/L1CAM/DNM2/TUBB2B	49
NPTXR	0	0.489924	0.986	0.933	0	0	GO:0042063	gliogenesis	88/2012	307/18866	1.23036e-18	2.82793e-16	2.09908e-16	PLP1/C1QA/CNP/MAPK1/CNTN2/NKX6-2/MAP2K1/APP/TPPP/SOD1/RTN4/BIN1/MAG/ABCA2/LPAR1/MYRF/ID4/SUN2/ATP1B2/CX3CL1/CD9/MBOAT7/DAAM2/ADGRG1/BOK/SOX10/SIRT2/GAP43/OPALIN/CLU/MAPT/OLIG2/PTPRZ1/CDK5R1/PAFAH1B1/MAPK3/OLIG1/FA2H/CSF1R/CHRM1/ZNF488/ERBB3/SOX8/MATN2/TSPO/EEF2/IL34/GRN/TREM2/NDRG1/PTEN/IFNGR1/HDAC11/WDR1/S100A8/CDK5R2/ZMIZ1/BMERB1/CTNNB1/PPP1CC/NLGN3/BNIP3/NR1D1/CRKL/PSEN1/METRN/TENM4/NFIB/ETV5/…	88	hsa05130	Pathogenic Escherichia coli infection	44/1041	197/8112	0.000131243	0.0016153	0.00115834	TUBA1A/CLDN11/MAPK1/TUBA1B/TUBB4A/TUBB/TUBB/TUBB/TUBB/TUBB/TUBB/TUBB/TUBB/TUBB2A/GAPDH/ACTB/LPAR1/ARF1/PAK1/ARPC5/TUBB3/CYFIP2/RPS3/RAC1/MAPK3/ARPC4/BAIAP2/CDC42/PAK3/ARPC3/MYO5A/ACTR3B/NCL/ACTR3/ARPC1B/NCKAP1/HCLS1/JUN/TUBA4A/GNA12/TMBIM6/ARHGEF2/BRK1/RHOA/ACTR2/MAPK14/RAB1A/CYTH1/ARPC1A/MYH9/TUBB2B	44	R-HSA-112315	Transmission across Chemical Synapses	80/1351	270/10704	5.22355e-14	2.7283e-12	1.74682e-12	TUBA1A/SLC17A7/SYN2/GABRA5/MAPK1/TUBA1B/CALM3/CAMK2D/PRKCG/TUBB4A/NSF/TUBB2A/SYT1/CALM1/CALM2/STX1A/GRIA1/GNG2/CACNA1E/SYN1/AP2M1/GLS/CACNG3/VAMP2/NEFL/PRKAR1A/TUBB3/MAPT/STXBP1/NPTN/RAC1/MAPK3/CAMK1/CACNA2D1/HRAS/GABBR1/ARL6IP5/HSPA8/GRIN2B/GIT1/GNG7/PRKACB/GLRA2/GNG3/APBA1/KCNJ9/GNB1/GRIA2/AP2S1/AP2B1/GABRB3/GNAI1/DLG2/CHRNB2/DLG1/PRKAR1B/GNAL/CACNB1/DNAJC5/GABBR2/GRIA3/ADCY1/GRIN1/ARHGEF9/TUBA…	80
CLDND1	0	0.489034	0.808	0.619	0	0	GO:0043312	neutrophil degranulation	119/2012	487/18866	1.46722e-18	3.24746e-16	2.41048e-16	SERPINA3/CHI3L1/C3/FTL/HSP90AA1/HSPA1A/MAPK1/PGRMC1/HSP90AB1/TIMP2/CTSB/CTSD/TUBB/FTH1/ATP6V0C/MIF/PSAP/B2M/DYNLL1/PPIA/EEF1A1/FCER1G/MGST1/CD63/PKM/HLA-B/LAMP2/ITGB2/TYROBP/ATP8A1/TOLLIP/RNASET2/SYNGR1/S100A11/ARPC5/SIRPA/NFASC/RAB7A/ARL8A/CD44/RAC1/DBNL/CYBA/KCNAB2/ATP6AP2/TMEM63A/PADI2/ABR/TMEM30A/ATP6V0A1/RAP2B/NPC2/HSPA8/SPTAN1/PRKCD/BST2/EEF2/SERPINA1/GRN/LAMP1/GPI/VAPA/GOLGA7/NDUFC2/HSPA1B…	119	hsa04713	Circadian entrainment	26/1041	97/8112	0.000155204	0.00183945	0.00131908	MAPK1/CALM3/CAMK2D/PRKCG/GNAO1/CALM1/CALM2/GRIA1/GNG2/MAPK3/GRIN2B/GNG7/PRKACB/GNG3/KCNJ9/GNB1/GRIA2/GNAI1/GUCY1B1/CACNA1I/GNAQ/GRIA3/ADCY1/GRIN1/ADCY5/CAMK2B	26	R-HSA-72649	Translation initiation complex formation	31/1351	58/10704	8.44204e-14	4.09439e-12	2.62148e-12	RPS2/RPS19/RPSA/RPS28/RPS6/RPS18/RPS17/EIF4A2/RPS15/RPS14/RPS8/RPS23/RPS3/RPS9/EIF4H/RPS11/RPS5/RPS24/EIF4G1/RPS3A/RPS16/RPS27A/EIF3M/PABPC1/EIF3B/RPS12/EIF4B/EIF3E/RPS20/EIF4E/EIF1AX	31
C1QC	0	0.488846	0.655	0.305	0	0	GO:0002283	neutrophil activation involved in immune response	119/2012	490/18866	2.45544e-18	5.0599e-16	3.7558e-16	SERPINA3/CHI3L1/C3/FTL/HSP90AA1/HSPA1A/MAPK1/PGRMC1/HSP90AB1/TIMP2/CTSB/CTSD/TUBB/FTH1/ATP6V0C/MIF/PSAP/B2M/DYNLL1/PPIA/EEF1A1/FCER1G/MGST1/CD63/PKM/HLA-B/LAMP2/ITGB2/TYROBP/ATP8A1/TOLLIP/RNASET2/SYNGR1/S100A11/ARPC5/SIRPA/NFASC/RAB7A/ARL8A/CD44/RAC1/DBNL/CYBA/KCNAB2/ATP6AP2/TMEM63A/PADI2/ABR/TMEM30A/ATP6V0A1/RAP2B/NPC2/HSPA8/SPTAN1/PRKCD/BST2/EEF2/SERPINA1/GRN/LAMP1/GPI/VAPA/GOLGA7/NDUFC2/HSPA1B…	119	hsa04071	Sphingolipid signaling pathway	30/1041	119/8112	0.000167478	0.00191404	0.00137257	MAPK1/PRKCG/MAP2K1/CTSD/FCER1G/PPP2CB/PPP2R2C/RAC1/MAPK3/HRAS/HRAS/PPP2CA/PRKCZ/PTEN/PTEN/CERS6/GNAI1/PPP2R1A/PIK3R2/ADORA1/GNAQ/SPTLC2/SMPD1/GNA12/CERS4/CERS2/RHOA/ASAH1/PRKCE/MAPK14/PPP2R5C/PPP2R2B	30	R-HSA-72702	Ribosomal scanning and start codon recognition	31/1351	58/10704	8.44204e-14	4.09439e-12	2.62148e-12	RPS2/RPS19/RPSA/RPS28/RPS6/RPS18/RPS17/EIF4A2/RPS15/RPS14/RPS8/RPS23/RPS3/RPS9/EIF4H/RPS11/EIF5/RPS5/RPS24/EIF4G1/RPS3A/RPS16/RPS27A/EIF3M/EIF3B/RPS12/EIF4B/EIF3E/RPS20/EIF4E/EIF1AX	31
HPCAL4	0	0.474976	0.953	0.8	0	0	GO:0016049	cell growth	119/2012	490/18866	2.45544e-18	5.0599e-16	3.7558e-16	CRYAB/SPP1/HSP90AA1/HSPA1A/HSP90AB1/CPNE6/CAMK2D/APP/DNAJB2/SH3GL2/APOE/SYT1/DPYSL2/RTN4/SLIT1/MAG/GDI1/MEG3/CLSTN1/SHTN1/MAP2/SPOCK1/APBB1/GJA1/MTPN/SEMA3D/SGK1/PPP3CB/PAK1/RTN4R/SORBS2/SEMA4D/COBL/ENO1/SLIT3/MAPT/EIF4G2/RACK1/CDK5R1/CYFIP2/NRCAM/DBNL/PAFAH1B1/CYBA/CCDC85B/PHB/RUFY3/PRMT2/DACT3/IGFBP5/ADIPOR1/PPP2CA/FAM107A/RAB21/BST2/TNR/SEMA4F/SEMA4A/BCAR1/SYT17/SEMA3E/KRT17/CDC42/VEGFA/EIF4G1…	119	hsa04921	Oxytocin signaling pathway	36/1041	154/8112	0.000204653	0.00221718	0.00158995	MAPK1/CALM3/CAMK2D/PRKCG/MAP2K1/GNAO1/CALM1/ACTB/CALM2/PPP3CB/MYL6/CACNG3/ELK1/MAPK3/CAMK1/CACNA2D1/HRAS/HRAS/PRKACB/EEF2/KCNJ9/GNAI1/PPP1CA/GUCY1B1/PPP1CC/CACNB1/GNAQ/ADCY1/JUN/PPP1CB/ADCY5/PLA2G4C/RHOA/PRKAG2/CAMK2B/PPP3R1/MYL9	36	R-HSA-8856828	Clathrin-mediated endocytosis	53/1351	146/10704	1.5393e-13	7.08905e-12	4.53884e-12	TF/SH3GL2/DNAJC6/UBA52/SYT1/ACTB/UBB/BIN1/AP2M1/DNM1/SNAP91/VAMP2/ARPC5/CLTC/SH3GL3/CLTA/PACSIN1/UBC/HSPA8/ARPC4/ARRB2/SYNJ2/AP2S1/PICALM/AP2B1/GRB2/ARPC3/COPS7A/RAB5B/AMPH/TGOLN2/PIP5K1C/ACTR3/SYNJ1/HGS/RPS27A/M6PR/EPN2/CLTB/SGIP1/FNBP1/NECAP1/EPN1/RAB5A/EPS15/AP2A2/ACTR2/GRK3/SH3KBP1/AGFG1/COPS8/DNM2/ARPC1A	53
DBNDD2	0	0.473864	0.826	0.684	0	0	GO:0048167	regulation of synaptic plasticity	64/2012	191/18866	1.37103e-17	2.7311e-15	2.02721e-15	YWHAH/SYP/MAPK1/CNTN2/APP/APOE/YWHAG/PRNP/GRIA1/ARF1/SLC8A2/CX3CL1/NSMF/PPP3CB/TYROBP/NEUROD2/SYNGR1/SYNPO/VAMP2/MAPT/STXBP1/NPTN/RGS14/HRAS/SHISA9/GRIN2B/ATF4/FAM107A/TNR/KAT2A/LRRTM1/BAIAP2/PRKCZ/PTEN/ABHD6/PLK2/SYT4/NLGN3/SQSTM1/JPH4/ADORA1/NEURL1/STX4/ADCY1/GRIN1/CALB1/GRM5/PSEN1/LGMN/MPP2/NCSTN/SHISA7/STAU1/CAMK2B/NF1/AKAP5/SYNGAP1/LRRTM2/SYT7/CDK5/RAB5A/RAB3GAP1/PPFIA3/VGF	64	hsa05012	Parkinson disease	52/1041	249/8112	0.00020786	0.00221718	0.00158995	TUBA1A/SNCA/TUBA1B/CALM3/CAMK2D/TUBB4A/UCHL1/TUBB/TUBB/TUBB/TUBB/TUBB/TUBB/TUBB/TUBB/TUBB2A/UBA52/CALM1/UBB/CALM2/NDUFS5/MAOB/HSPA5/GPR37/NDUFA3/NDUFA3/NDUFA3/NDUFA3/NDUFA3/NDUFA3/NDUFA3/NDUFA3/NDUFA3/NDUFA3/TUBB3/MAPT/MAPT/MAPT/TXN/KLC1/UBC/VDAC1/KIF5C/KIF5C/ATF4/PRKACB/UBA1/UQCR11/NDUFC2/GNAI1/PSMB4/GNAL/NDUFA11/NDUFB8/TUBA4A/ADCY5/RPS27A/ATP5MC2/CAMK2B/PSMA4/TXN2/BCL2L1/COX7A2L/PSMD4/NDUFS7/KI…	52	R-HSA-72662	Activation of the mRNA upon binding of the cap-binding complex and eIFs, and subsequent binding to 43S	31/1351	59/10704	1.56607e-13	7.08905e-12	4.53884e-12	RPS2/RPS19/RPSA/RPS28/RPS6/RPS18/RPS17/EIF4A2/RPS15/RPS14/RPS8/RPS23/RPS3/RPS9/EIF4H/RPS11/RPS5/RPS24/EIF4G1/RPS3A/RPS16/RPS27A/EIF3M/PABPC1/EIF3B/RPS12/EIF4B/EIF3E/RPS20/EIF4E/EIF1AX	31
NPTX1	0	0.468055	0.989	0.911	0	0	GO:0031346	positive regulation of cell projection organization	101/2012	394/18866	1.91802e-17	3.69745e-15	2.7445e-15	CPNE6/ANLN/MAP2K1/APOE/SYT1/GPM6A/ENPP2/LPAR1/GDI1/ARF1/CNTN1/SNX3/SHTN1/STMN2/APBB1/ATP1B2/CX3CL1/ENC1/PAK1/ARHGDIA/DPYSL3/SEMA4D/HSPA5/COBL/FSCN1/NEFL/PFN1/MAPT/FEZ1/NDRG4/NPTN/RAC1/DBNL/PAFAH1B1/CAMK1/HRAS/RUFY3/TMEM30A/PACSIN1/ATP8A2/SERPINI1/OPA1/KCTD17/RAB21/PLXNB1/GRN/SYT17/KAT2A/BAIAP2/CDC42/RIPOR2/VEGFA/PAK3/PALM/TENM3/ZEB2/CCP110/RASAL1/SYT4/SEPTIN7/ACTR3/PLXND1/MIEN1/NEURL1/RAB8B/FAM98…	101	hsa04730	Long-term depression	18/1041	60/8112	0.00035551	0.00366978	0.00263162	MAPK1/PRKCG/MAP2K1/GNAO1/GRIA1/PPP2CB/GNAZ/MAPK3/HRAS/HRAS/PPP2CA/GRIA2/GNAI1/GUCY1B1/PPP2R1A/GNAQ/GRIA3/PLA2G4C/GNA12	18	R-HSA-112316	Neuronal System	105/1351	410/10704	2.44492e-13	1.07103e-11	6.85738e-12	TUBA1A/SLC17A7/SYN2/GABRA5/MAPK1/TUBA1B/CALM3/CAMK2D/PRKCG/TUBB4A/RTN3/NSF/TUBB2A/SYT1/CALM1/CALM2/STX1A/GRIA1/GNG2/CACNA1E/SYN1/AP2M1/KCNG1/KCNMB4/GLS/CACNG3/VAMP2/NEFL/PRKAR1A/TUBB3/MAPT/STXBP1/NPTN/RAC1/DBNL/KCNQ2/MAPK3/KCNAB2/CAMK1/CACNA2D1/HRAS/KCNK1/GABBR1/ARL6IP5/HSPA8/GRIN2B/GIT1/GNG7/PRKACB/GLRA2/GNG3/LRRTM1/NRXN2/APBA1/KCNJ9/GNB1/GRIA2/AP2S1/AP2B1/NLGN2/GABRB3/GNAI1/DLG2/CHRNB2/DLGAP4/D…	105
HSPA1A	0	0.468049	0.786	0.696	0	0	GO:0032535	regulation of cellular component size	99/2012	383/18866	2.1905e-17	4.09076e-15	3.03644e-15	SPP1/TMSB4X/CNTN2/HSP90AB1/APOE/TMSB10/DPYSL2/RTN4/BIN1/CFL1/MAG/GDI1/ARF1/CORO1A/SHTN1/AP2M1/MAP2/AQP4/SPTBN1/AQP1/MTPN/SEMA3D/PAK1/RTN4R/SEMA4D/ARPC5/NEFL/PFN1/MAPT/CDK5R1/CYFIP2/CAPZB/NRCAM/RAC1/RAB3B/DBNL/PAFAH1B1/CLCN3/RUFY3/SPTAN1/RAB21/PRKCD/BAG4/ARPC4/TNR/EVL/SEMA4F/SEMA4A/PREX1/BAIAP2/SEMA3E/VEGFA/PICALM/PAK3/PTEN/GRB2/RAP1GAP2/ARPC3/WDR1/GMFB/PPP1CA/DMTN/CAPZA1/DSTN/ACTR3B/DLG1/SPART/AB…	99	hsa04360	Axon guidance	40/1041	182/8112	0.000372178	0.00372178	0.0026689	MAPK1/CAMK2D/DPYSL2/SLIT1/CFL1/SEMA3D/PPP3CB/PAK1/SEMA4D/SLIT3/RAC1/MAPK3/PTK2/HRAS/HRAS/SEMA4F/DPYSL5/SEMA4A/PLXNB1/SEMA3E/CDC42/PAK3/PRKCZ/EFNB3/GNAI1/PIK3R2/SEMA6B/CFL2/PLXNC1/RHOA/CAMK2B/SRGAP2/PPP3R1/ENAH/CDK5/BMPR2/PLXNA2/PLXNA1/MYL12B/MYL9/L1CAM	40	R-HSA-71291	Metabolism of amino acids and derivatives	98/1351	374/10704	3.60251e-13	1.52881e-11	9.7884e-12	QDPR/SLC44A1/RPS2/RPS19/RPL13/RPSA/OAZ1/UBA52/RPL4/RPS28/SERINC1/RPS6/RPL13A/RPS18/RPL28/RPLP1/RPL39/RPL29/RPLP0/RPL37A/RPL7A/RPS17/RPL19/RPLP2/SLC6A8/RPL17/GLS/RPS15/CARNS1/RPL31/RPS14/RPL24/RPL5/RPL11/RPL30/RPL15/RPL27A/RPL18/RPL23/RPS8/RPS23/RPL35/RPL32/RPS3/RPS9/RPS11/RPL18A/RPL27/RPL8/RPL34/SERINC3/RPL7/RPL10A/CRYM/RPS5/RPL6/RPS24/NQO1/RPL22/RPL10/RPL36A/RPL21/AZIN1/RPS3A/PCBD1/RPL9/GAMT/RPL…	98
CLDN11	0	0.464217	0.501	0.183	0	0	GO:0008088	axo-dendritic transport	35/2012	70/18866	1.89405e-16	3.42995e-14	2.54594e-14	HSPB1/APP/UCHL1/SOD1/MAP2/CNIH2/NEFL/KIF1A/MAPT/KIF1B/FEZ1/ARL8A/PAFAH1B1/AP3S1/KIF1C/RAB27B/MAPK8IP3/HSPA8/KIF5C/OPA1/RAB21/APBA1/DTNBP1/DLG2/DYNC1H1/DST/ARL8B/SFPQ/AP3B2/AP3M2/TRAK2/HNRNPU/FBXW11/KIF5B/FLOT2	35	hsa04722	Neurotrophin signaling pathway	29/1041	119/8112	0.000396889	0.00384862	0.00275987	MAPK1/CALM3/CAMK2D/MAP2K1/CALM1/YWHAE/YWHAE/CALM2/ARHGDIA/ARHGDIG/RAC1/MAPK3/HRAS/HRAS/ATF4/PRKCD/ARHGDIB/CDC42/GRB2/SORT1/PIK3R2/CRKL/JUN/PSEN1/SH2B1/RHOA/CAMK2B/RPS6KA2/CRK/MAPK14/RAP1A	29	R-HSA-6798695	Neutrophil degranulation	117/1351	480/10704	3.9075e-13	1.608e-11	1.02954e-11	SERPINA3/CHI3L1/C3/FTL/HSP90AA1/HSPA1A/MAPK1/PGRMC1/HSP90AB1/TIMP2/CTSB/CTSD/TUBB/FTH1/ATP6V0C/MIF/PSAP/B2M/DYNLL1/PPIA/EEF1A1/FCER1G/MGST1/CD63/PKM/HLA-B/LAMP2/ITGB2/TYROBP/ATP8A1/TOLLIP/HLA-A/RNASET2/SYNGR1/S100A11/ARPC5/SIRPA/NFASC/RAB7A/ARL8A/CD44/RAC1/DBNL/CYBA/KCNAB2/ATP6AP2/TMEM63A/PADI2/TMEM30A/ATP6V0A1/RAP2B/NPC2/HSPA8/SPTAN1/PRKCD/BST2/EEF2/SERPINA1/GRN/LAMP1/GPI/VAPA/GOLGA7/NDUFC2/HSPA…	117
APOC1	0	0.462598	0.694	0.309	0	0	GO:0002181	cytoplasmic translation	43/2012	103/18866	3.24963e-16	5.7117e-14	4.23961e-14	RPSA/RPS28/RPL13A/RPLP1/RPL39/RPL29/RPLP0/EIF4A2/PKM/RPL19/RPL17/RPL31/RPL24/RPL11/RPL30/RPL15/RPL18/RPS23/RPL32/EIF4H/RPL18A/RPL8/RPL10A/EIF5/RPL6/EEF2/RPL22/RPL36A/DHX9/EIF4G1/RBM4/RPL9/CPEB2/RPL38/TMA7/EIF3M/ZC3H15/EIF3B/RPL26/EIF4B/DENR/EIF3E/YTHDF2	43	hsa04514	Cell adhesion molecules	34/1041	149/8112	0.000489269	0.00460489	0.00330219	CLDN11/CNTN2/NCAM1/HLA-DRA/HLA-DRA/HLA-DRA/HLA-DRA/HLA-DRA/HLA-DRA/HLA-DRA/MAG/CNTN1/HLA-B/HLA-B/HLA-B/HLA-B/HLA-B/HLA-B/ITGB2/NCAM2/HLA-A/HLA-A/HLA-A/HLA-A/HLA-A/HLA-A/HLA-A/HLA-A/JAM3/NRCAM/NFASC/CD22/NRXN2/HLA-DPB1/HLA-DPB1/HLA-DPB1/HLA-DPB1/HLA-DPB1/HLA-DPB1/HLA-DPB1/HLA-DPB1/HLA-DRB1/HLA-DRB1/HLA-DRB1/HLA-DRB1/HLA-DRB1/HLA-DRB1/NECTIN1/HLA-DPA1/HLA-DPA1/HLA-DPA1/HLA-DPA1/HLA-DPA1/HLA-DPA1/HL…	34	R-HSA-3371497	HSP90 chaperone cycle for steroid hormone receptors (SHR)	29/1351	55/10704	8.51842e-13	3.40236e-11	2.17839e-11	TUBA1A/HSP90AA1/HSPA1A/HSP90AB1/TUBA1B/TUBB4A/DNAJA1/PTGES3/TUBB2A/DYNLL1/DNAJA4/DCTN1/STIP1/TUBB3/CAPZB/DNAJB1/DYNLL2/HSPA8/HSPA2/DYNC1LI2/DCTN5/HSPA1B/DYNC1H1/CAPZA1/FKBP4/TUBA4A/DYNC1I1/ACTR1A/TUBB2B	29
APLP1	0	0.460877	0.996	0.964	0	0	GO:0031345	negative regulation of cell projection organization	61/2012	188/18866	4.45481e-16	7.60627e-14	5.64589e-14	SPP1/YWHAH/THY1/APOE/RTN4/MAG/B2M/PRNP/LPAR1/GDI1/LINGO1/MAP2/STMN2/SPOCK1/SEMA3D/ARHGDIA/RTN4R/DPYSL3/SEMA4D/MAP4/RAP1GAP/CDK5R1/CAPZB/ITM2C/PAFAH1B1/PTK2/RUFY3/GRIN2B/PRKCD/TNR/EVL/SEMA4F/SEMA4A/SEMA3E/DENND5A/RTN4RL2/PTEN/RAP1GAP2/EFNB3/CCP110/PLK2/NLGN3/SPART/BCL11A/FKBP4/SEMA6B/IFRD1/PSEN1/CERS2/RHOA/SYNGAP1/EVI5L/TRAK2/LRP1/CDK5/MDM2/HDAC2/NR2F1/OMG/DNM2/VIM	61	hsa04022	cGMP-PKG signaling pathway	37/1041	167/8112	0.00051735	0.00473006	0.00339195	ATP2B4/MAPK1/CALM3/MAP2K1/CALM1/CALM2/ATP1A3/SLC8A2/ATP1B1/ATP2A2/ATP1B2/PPP3CB/ATP1A2/KCNMB4/PDE2A/EDNRB/MAPK3/VDAC1/ATF4/GNAI1/PPP1CA/GUCY1B1/PPP1CC/ADORA1/GNAQ/ADCY1/PPP1CB/ADCY5/GNA12/GTF2I/RHOA/ATP2B3/PPP3R1/ATP2B1/MEF2D/PRKCE/MYL9	37	R-HSA-2132295	MHC class II antigen presentation	45/1351	123/10704	7.81843e-12	3.03355e-10	1.94226e-10	TUBA1A/CD74/TUBA1B/CTSB/TUBB4A/HLA-DRA/SH3GL2/CTSD/CANX/TUBB2A/ARF1/DYNLL1/AP2M1/DNM1/DCTN1/KIF3C/TUBB3/CAPZB/RAB7A/CLTC/CLTA/DYNLL2/KLC1/DYNC1LI2/HLA-DPB1/DCTN5/HLA-DRB1/AP2S1/AP2B1/HLA-DPA1/DYNC1H1/CAPZA1/CTSS/CTSA/KIFAP3/TUBA4A/DYNC1I1/LGMN/ACTR1A/AP2A2/KIF5B/SAR1B/AP1S1/DNM2/TUBB2B	45
GABRA5	0	0.456983	0.653	0.262	0	0	GO:0048588	developmental cell growth	70/2012	237/18866	7.83963e-16	1.30138e-13	9.65971e-14	SPP1/HSP90AA1/HSP90AB1/CPNE6/APP/SH3GL2/APOE/SYT1/DPYSL2/RTN4/SLIT1/MAG/GDI1/SHTN1/MAP2/SEMA3D/PPP3CB/PAK1/RTN4R/SORBS2/SEMA4D/COBL/SLIT3/MAPT/CDK5R1/CYFIP2/NRCAM/DBNL/PAFAH1B1/RUFY3/PRMT2/RAB21/TNR/SEMA4F/SEMA4A/SYT17/SEMA3E/VEGFA/PRKCZ/ZEB2/SLC9A6/RASAL1/RGS4/SYT4/CTNNB1/NLGN3/SPART/BCL11A/SEMA6B/PIN1/USP9X/DCLK1/IFRD1/YY1/ALCAM/NEDD4L/DVL1/CPNE5/LRP1/CDKL5/CDK5/BMPR2/NDN/IST1/AKAP6/MAP2K4/PLXN…	70	hsa04540	Gap junction	23/1041	88/8112	0.000541274	0.00480047	0.00344244	TUBA1A/MAPK1/TUBA1B/PRKCG/TUBB4A/MAP2K1/TUBB/TUBB/TUBB/TUBB/TUBB/TUBB/TUBB/TUBB/TUBB2A/LPAR1/GJA1/TUBB3/MAPK3/HRAS/HRAS/PRKACB/GRB2/GNAI1/GUCY1B1/GNAQ/ADCY1/TUBA4A/ADCY5/GRM5/TUBB2B	23	R-HSA-112314	Neurotransmitter receptors and postsynaptic signal transmission	62/1351	205/10704	1.46784e-11	5.53704e-10	3.54515e-10	TUBA1A/GABRA5/MAPK1/TUBA1B/CALM3/CAMK2D/PRKCG/TUBB4A/NSF/TUBB2A/CALM1/CALM2/GRIA1/GNG2/AP2M1/CACNG3/NEFL/PRKAR1A/TUBB3/MAPT/NPTN/RAC1/MAPK3/CAMK1/HRAS/GABBR1/GRIN2B/GIT1/GNG7/PRKACB/GLRA2/GNG3/APBA1/KCNJ9/GNB1/GRIA2/AP2S1/AP2B1/GABRB3/GNAI1/DLG2/CHRNB2/DLG1/PRKAR1B/GNAL/GABBR2/GRIA3/ADCY1/GRIN1/ARHGEF9/TUBA4A/ADCY5/GLRB/TSPAN7/PRKAG2/CAMK2B/AKAP5/RPS6KA2/AP2A2/MDM2/GABRA2/TUBB2B	62
MMD	0	0.455654	0.659	0.273	0	0	GO:1902903	regulation of supramolecular fiber organization	94/2012	373/18866	8.1747e-16	1.32033e-13	9.80034e-14	CRYAB/HSPA1A/SNCA/TMSB4X/STMN1/TUBB4A/APP/APOE/TMSB10/BIN1/CFL1/S100A10/LPAR1/ARF1/CORO1A/MAP2/STMN2/SPTBN1/MTPN/CX3CL1/PAK1/TMEFF2/DCTN1/MAPRE3/SYNPO/ARPC5/PFN1/CLU/MAPT/CDK5R1/CYFIP2/CAPZB/RPS3/AEBP1/RAC1/DBNL/ARL2/HSPA8/CLIP3/SPTAN1/PRKCD/BAG4/ARPC4/EVL/PREX1/BAIAP2/CLASP2/CDC42/TAOK1/PAK3/HSPA1B/MID1IP1/GRB2/ARPC3/WDR1/GMFB/MAP6D1/RGS4/DMTN/LIMCH1/CAPZA1/DSTN/ACTR3B/DLG1/BMERB1/FLNA/ABI2/FKBP…	94	hsa05134	Legionellosis	17/1041	57/8112	0.000555054	0.00480047	0.00344244	C3/HSPA1A/HSPA1A/HSPA1A/HSPA1A/HSPA1A/ARF1/HSPD1/EEF1A1/ITGB2/EEF1A2/EEF1G/HSPA8/HSPA2/HSPA1B/HSPA1B/HSPA1B/HSPA1B/HSPA1B/BNIP3/HBS1L/HSF1/HSF1/CLK1/SAR1B/RAB1A	17	R-HSA-2029482	Regulation of actin dynamics for phagocytic cup formation	29/1351	61/10704	2.4333e-11	8.93088e-10	5.71809e-10	HSP90AA1/MAPK1/HSP90AB1/ACTB/CFL1/PAK1/ARPC5/CYFIP2/RAC1/MAPK3/PTK2/ARPC4/FCGR3A/BAIAP2/CDC42/GRB2/ARPC3/MYO5A/ABI2/ACTR3/ARPC1B/NCKAP1/BRK1/ELMO2/CRK/ACTR2/ELMO1/ARPC1A/MYH9	29
CTXN1	0	0.455494	0.98	0.878	0	0	GO:1990138	neuron projection extension	57/2012	172/18866	1.41913e-15	2.23176e-13	1.65657e-13	HSP90AA1/HSP90AB1/CPNE6/SH3GL2/APOE/SYT1/DPYSL2/RTN4/SLIT1/MAG/GDI1/SHTN1/MAP2/SEMA3D/PPP3CB/PAK1/RTN4R/SEMA4D/SLIT3/MAPT/CDK5R1/CYFIP2/NRCAM/DBNL/PAFAH1B1/RUFY3/RAB21/TNR/SEMA4F/SEMA4A/SYT17/SEMA3E/VEGFA/PRKCZ/SLC9A6/RASAL1/SYT4/CTNNB1/NLGN3/BCL11A/SEMA6B/USP9X/DCLK1/IFRD1/ALCAM/NEDD4L/DVL1/CPNE5/LRP1/CDKL5/CDK5/BMPR2/NDN/PLXNA1/L1CAM/DNM2/DDR1	57	hsa04024	cAMP signaling pathway	45/1041	216/8112	0.000574863	0.00484095	0.00347147	ATP2B4/NPY/MAPK1/CALM3/CAMK2D/MAP2K1/CALM1/CALM2/ATP1A3/GRIA1/ATP1B1/ATP2A2/ATP1B2/PAK1/ATP1A2/PTGER3/RAC1/MAPK3/GABBR1/GABBR1/GABBR1/GABBR1/GABBR1/GABBR1/GABBR1/HHIP/CHRM1/SSTR1/GRIN2B/PRKACB/SSTR2/GRIA2/GNAI1/PPP1CA/PPP1CC/PIK3R2/ADORA1/GABBR2/GRIA3/ADCY1/GRIN1/JUN/PPP1CB/ADCY5/RAPGEF4/RHOA/CAMK2B/ATP2B3/ATP2B1/MYL9/RAP1A	45	R-HSA-373755	Semaphorin interactions	30/1351	65/10704	2.8298e-11	1.01128e-09	6.47483e-10	HSP90AA1/HSP90AB1/DPYSL2/CFL1/PAK1/TYROBP/MYL6/DPYSL3/SEMA4D/CDK5R1/RAC1/DPYSL5/SEMA4A/PLXNB1/TREM2/SEMA3E/PAK3/PIP5K1C/PLXND1/PLXNC1/RHOA/ARHGAP35/CDK5/PLXNA2/PLXNA1/TLN1/MYL12B/MYL9/RHOC/MYH9	30
PPP1R14A	0	0.452164	0.525	0.222	0	0	GO:0070997	neuron death	91/2012	360/18866	1.94644e-15	2.98254e-13	2.21384e-13	C1QA/NUPR1/SOD2/GABRA5/SNCA/HIPK2/HSP90AB1/SNCG/PRKCG/APP/FAIM2/GAPDH/APOE/UBB/SOD1/MAG/PRNP/DDIT4/HSPD1/CORO1A/CX3CL1/NSMF/ITGB2/TRIM2/TYROBP/BOK/HSPA5/NEFL/CLU/MAPT/RACK1/PTPRZ1/STXBP1/CDK5R1/ELK1/AGAP2/HRAS/BACE1/DHCR24/ERBB3/GRIN2B/ATF4/NENF/ARRB2/THRB/NQO1/CDC34/GRN/SET/CDC42/PICALM/CHP1/PAK3/EIF4G1/AP2B1/HYOU1/GABRB3/CHL1/TYRO3/CTNNB1/BNIP3/DNAJC5/GBA/FBXW7/ADORA1/PIN1/PPT1/GRIN1/JUN/PSEN1/…	91	hsa05020	Prion disease	54/1041	273/8112	0.000646286	0.00530286	0.00380271	C1QB/C1QA/TUBA1A/C1QC/HSPA1A/HSPA1A/HSPA1A/HSPA1A/HSPA1A/MAPK1/TUBA1B/NCAM1/TUBB4A/TUBB/TUBB/TUBB/TUBB/TUBB/TUBB/TUBB/TUBB/TUBB2A/SOD1/PRNP/NDUFS5/PPP3CB/NCAM2/STIP1/HSPA5/NDUFA3/NDUFA3/NDUFA3/NDUFA3/NDUFA3/NDUFA3/NDUFA3/NDUFA3/NDUFA3/NDUFA3/TUBB3/RAC1/CYBA/MAPK3/KLC1/VDAC1/HSPA8/KIF5C/KIF5C/GRIN2B/ATF4/PRKCD/PRKACB/HSPA2/UQCR11/NDUFC2/HSPA1B/HSPA1B/HSPA1B/HSPA1B/HSPA1B/PSMB4/PIK3R2/NDUFA11/NDUFB…	54	R-HSA-195258	RHO GTPase Effectors	83/1351	327/10704	1.41574e-10	4.92968e-09	3.15628e-09	TUBA1A/PPP1R14A/YWHAZ/YWHAH/MAPK1/TUBA1B/CALM3/TUBB4A/YWHAB/TUBB2A/YWHAG/CALM1/ACTB/YWHAE/CALM2/CFL1/DYNLL1/YWHAQ/XPO1/PAK1/PPP2CB/MYL6/ARPC5/PFN1/TUBB3/CYFIP2/RAC1/PAFAH1B1/CYBA/MAPK3/PTK2/DYNLL2/KLC1/PPP2CA/PRKCD/FMNL2/ARPC4/EVL/RTKN/RANGAP1/BAIAP2/DYNC1LI2/CLASP2/CDC42/TAOK1/PAK3/PRKCZ/GRB2/ARPC3/S100A8/DYNC1H1/NUDC/CTNNB1/PPP1CC/PPP2R1A/FLNA/ABI2/ACTR3/PIN1/ARPC1B/NCKAP1/PPP1CB/TUBA4A/RHOG/DY…	83
APOD	0	0.448791	0.964	0.895	0	0	GO:1901214	regulation of neuron death	84/2012	321/18866	2.80353e-15	4.18847e-13	3.10897e-13	C1QA/NUPR1/SOD2/GABRA5/SNCA/HIPK2/HSP90AB1/SNCG/PRKCG/FAIM2/APOE/UBB/SOD1/MAG/PRNP/DDIT4/HSPD1/CORO1A/CX3CL1/NSMF/ITGB2/TRIM2/TYROBP/BOK/NEFL/CLU/MAPT/RACK1/PTPRZ1/STXBP1/CDK5R1/ELK1/AGAP2/HRAS/BACE1/DHCR24/ERBB3/GRIN2B/ATF4/NENF/ARRB2/NQO1/CDC34/GRN/SET/CDC42/PICALM/CHP1/PAK3/EIF4G1/AP2B1/HYOU1/GABRB3/CHL1/TYRO3/CTNNB1/DNAJC5/GBA/FBXW7/ADORA1/PIN1/PPT1/GRIN1/JUN/PSEN1/LGMN/HSF1/CD200/NCOA7/RHOA/…	84	hsa04120	Ubiquitin mediated proteolysis	32/1041	140/8112	0.00068675	0.005494	0.00393978	UBA52/UBB/UBC/SKP1/CDC34/UBA1/BTRC/UBE2E2/ELOB/FANCL/FBXW7/UBE2R2/UBE2N/NEDD4L/RPS27A/UBE2Z/UBE2Q1/UBE2K/RBX1/TRIP12/UBE2W/UBE2B/UBE4B/UBE4A/UBA2/MDM2/FBXW11/KEAP1/UBE2I/CUL3/UBE2L6/UBE2D2	32	R-HSA-76002	Platelet activation, signaling and aggregation	71/1351	263/10704	1.68008e-10	5.70387e-09	3.65196e-09	SERPINA3/TF/YWHAZ/TMSB4X/MAPK1/CALM3/PRKCG/APP/CALM1/SOD1/CALM2/PSAP/CFL1/GNG2/PPIA/FCER1G/CD63/CD9/LAMP2/HSPA5/PFN1/CLU/DGKZ/RAC1/ANXA5/MAPK3/PTK2/RAB27B/SELENOP/PRKCD/ARRB2/GNG7/TIMP1/BCAR1/SERPINA1/APLP2/GNG3/RASGRP1/CDC42/GNB1/VEGFA/PRKCZ/ABHD6/GRB2/CHID1/WDR1/LGALS3BP/GNAI1/FLNA/PIK3R2/GNAQ/STX4/TUBA4A/GP1BB/RHOG/RAPGEF4/MANF/DGKG/GNA12/CAP1/RHOA/QSOX1/STXBP3/CRK/PRKCE/PCDH7/MAPK14/TLN1/ENDO…	71
ERMN	0	0.438929	0.436	0.142	0	0	GO:0030705	cytoskeleton-dependent intracellular transport	62/2012	200/18866	2.90445e-15	4.23342e-13	3.14233e-13	HSPB1/TUBA1A/TUBA1B/APP/UCHL1/TUBB/UBB/SOD1/DYNLL1/MAP2/SUN2/CNIH2/NEFL/KIF3C/KIF1A/MAPT/KIF1B/FEZ1/ARL8A/PAFAH1B1/AP3S1/DYNLL2/KIF1C/RAB27B/MAPK8IP3/HSPA8/KIF5C/OPA1/RAB21/LAMP1/RASGRP1/APBA1/CDC42/PRKCZ/DTNBP1/MYO5A/SSNA1/DLG2/DYNC1H1/ARHGAP21/MAP6D1/SYT4/DST/DYNLRB1/ARL8B/RAB6A/SFPQ/AP3B2/AP3M2/KIFAP3/DYNC1I1/TUB/TRAK2/HNRNPU/TANC2/PPFIA2/FBXW11/RHOT1/KIF5B/RAB1A/MAP6/FLOT2	62	hsa05211	Renal cell carcinoma	19/1041	69/8112	0.000808832	0.00631283	0.00452697	MAPK1/MAP2K1/PAK1/RAC1/MAPK3/HRAS/HRAS/CDC42/VEGFA/PAK3/ELOB/GRB2/PIK3R2/CRKL/JUN/RBX1/EGLN2/CRK/ARNT2/RAP1A	19	R-HSA-72695	Formation of the ternary complex, and subsequently, the 43S complex	25/1351	51/10704	2.53542e-10	8.3978e-09	5.37678e-09	RPS2/RPS19/RPSA/RPS28/RPS6/RPS18/RPS17/RPS15/RPS14/RPS8/RPS23/RPS3/RPS9/RPS11/RPS5/RPS24/RPS3A/RPS16/RPS27A/EIF3M/EIF3B/RPS12/EIF3E/RPS20/EIF1AX	25
MT-ND3	0	0.435114	1	1	0	0	GO:0050769	positive regulation of neurogenesis	111/2012	485/18866	3.16474e-15	4.50297e-13	3.34241e-13	MMD/CPNE6/TIMP2/NKX6-2/MAP2K1/APOE/SYT1/BIN1/MAG/LPAR1/GDI1/ARF1/CNTN1/SNX3/SHTN1/STMN2/APBB1/ATP1B2/CX3CL1/NSMF/ENC1/PAK1/ARHGDIA/NEUROD2/DPYSL3/SEMA4D/HSPA5/SOX10/COBL/NEFL/MAPT/FEZ1/OLIG2/NDRG4/PTPRZ1/NRCAM/NPTN/DBNL/PAFAH1B1/CAMK1/RGS14/SH3GL3/RUFY3/TMEM30A/NUMBL/PACSIN1/ATP8A2/ZNF488/SOX8/SERPINI1/OPA1/RAB21/TSPO/PLXNB1/IL34/GRN/SMARCD3/SYT17/TREM2/BAIAP2/VEGFA/PAK3/EIF4G1/PTEN/TENM3/ZEB2/NA…	111	hsa04015	Rap1 signaling pathway	43/1041	210/8112	0.00109146	0.00831585	0.00596334	MAPK1/CALM3/PRKCG/MAP2K1/GNAO1/CALM1/ACTB/CALM2/LPAR1/ITGB2/PFN1/RAP1GAP/RAC1/MAPK3/RGS14/HRAS/HRAS/FGF1/CSF1R/GRIN2B/EVL/BCAR1/BCAR1/CDC42/VEGFA/PRKCZ/GNAI1/CTNNB1/RAPGEF5/PIK3R2/GNAQ/CRKL/ADCY1/GRIN1/ADCY5/RAPGEF4/DOCK4/TLN2/RHOA/FGFR2/ENAH/CRK/MAPK14/TLN1/RAP1A	43	R-HSA-2682334	EPH-Ephrin signaling	35/1351	92/10704	4.82492e-10	1.56006e-08	9.98843e-09	ACTB/CFL1/AP2M1/PAK1/DNM1/MYL6/ARPC5/RAC1/PTK2/CLTC/HRAS/CLTA/GRIN2B/GIT1/ARPC4/CDC42/AP2S1/PAK3/AP2B1/ARPC3/EFNB3/ACTR3/ARPC1B/GRIN1/PSEN1/CLTB/NCSTN/RHOA/AP2A2/ACTR2/ADAM10/MYL12B/MYL9/ARPC1A/MYH9	35
HSP90B1	0	0.434763	0.905	0.827	0	0	GO:0032386	regulation of intracellular transport	90/2012	358/18866	3.97649e-15	5.5264e-13	4.10207e-13	CRYAB/APOD/YWHAZ/YWHAH/MAPK1/HSP90AB1/MAP2K1/YWHAB/OAZ1/YWHAG/YWHAE/ABCA2/PRNP/GDI1/ARF1/SNX3/SREBF2/HPCA/YWHAQ/MAP2/CNIH2/XPO1/ITGB2/UHMK1/PAK1/CD81/VAMP2/FEZ1/TXN/NDRG4/CDK5R1/MAPK3/CAMK1/HRAS/RUFY3/TMEM30A/CHRM1/ATP5IF1/BCAP31/RAB21/PRKCD/BAG4/NUCB1/PKIA/RANGAP1/LAMP1/ANK3/CDC42/PDCD5/DHX9/CHP1/RAN/RBM4/RHOU/DYNC1H1/DMTN/ANP32B/PPP1CC/FLNA/PIK3R2/UBL5/FBXW7/BAP1/HCLS1/PSEN1/NUTF2/UFM1/ARHGAP1/…	90	hsa04915	Estrogen signaling pathway	31/1041	138/8112	0.00112217	0.00835105	0.00598858	HSP90AA1/HSPA1A/HSPA1A/HSPA1A/HSPA1A/HSPA1A/HSP90B1/MAPK1/HSP90AB1/CALM3/MAP2K1/GNAO1/CTSD/CALM1/CALM2/MAPK3/HRAS/HRAS/GABBR1/GABBR1/GABBR1/GABBR1/GABBR1/GABBR1/GABBR1/HSPA8/ATF4/PRKCD/PRKACB/HSPA2/KRT17/KCNJ9/HSPA1B/HSPA1B/HSPA1B/HSPA1B/HSPA1B/GRB2/GNAI1/PIK3R2/FKBP4/GNAQ/GABBR2/ADCY1/JUN/ADCY5	31	R-HSA-438064	Post NMDA receptor activation events	32/1351	80/10704	5.99511e-10	1.89334e-08	1.21223e-08	TUBA1A/MAPK1/TUBA1B/CALM3/CAMK2D/TUBB4A/TUBB2A/CALM1/CALM2/GRIA1/NEFL/PRKAR1A/TUBB3/MAPT/RAC1/MAPK3/CAMK1/HRAS/GRIN2B/GIT1/PRKACB/GRIA2/DLG2/DLG1/PRKAR1B/ADCY1/GRIN1/TUBA4A/PRKAG2/CAMK2B/RPS6KA2/TUBB2B	32
MAP4K4	0	0.434715	0.652	0.363	0	0	GO:0098693	regulation of synaptic vesicle cycle	44/2012	114/18866	4.68854e-15	6.36789e-13	4.72667e-13	SLC17A7/SNCA/SYP/CALM3/PRKCG/NAPB/SYT1/STX1A/SYN1/ATP2A2/PPP3CB/DNM1/STXBP1/CDK5R1/RAB3B/NCS1/BACE1/PCDH17/GIT1/NAPA/BSN/APBA1/PTEN/DTNBP1/NLGN2/CPLX3/CHRNB2/SYT4/PRKAR1B/NLGN3/DNAJC5/PREPL/BTBD9/ADCY1/RAPGEF4/DVL1/SYT7/CDK5/RAB5A/PPFIA2/RAB3GAP1/APBA2/CDH2/RAP1A	44	hsa05152	Tuberculosis	38/1041	180/8112	0.00115758	0.00841879	0.00603716	C3/CD74/MAPK1/CALM3/CAMK2D/HLA-DRA/HLA-DRA/HLA-DRA/HLA-DRA/HLA-DRA/HLA-DRA/HLA-DRA/CTSD/ATP6V0C/CALM1/CALM2/HSPD1/CORO1A/FCER1G/ATP6AP1/ATP6V1H/PPP3CB/LAMP2/ITGB2/RAB7A/MAPK3/ATP6V0A1/ATP6V0B/ATP6V0D1/FCGR3A/LAMP1/HLA-DPB1/HLA-DPB1/HLA-DPB1/HLA-DPB1/HLA-DPB1/HLA-DPB1/HLA-DPB1/HLA-DPB1/HLA-DRB1/HLA-DRB1/HLA-DRB1/HLA-DRB1/HLA-DRB1/HLA-DRB1/HLA-DPA1/HLA-DPA1/HLA-DPA1/HLA-DPA1/HLA-DPA1/HLA-DPA1/HLA-D…	38	R-HSA-2029480	Fcgamma receptor (FCGR) dependent phagocytosis	33/1351	86/10704	1.16425e-09	3.59329e-08	2.30064e-08	HSP90AA1/MAPK1/HSP90AB1/PLD3/ACTB/CFL1/PAK1/ARPC5/CYFIP2/RAC1/MAPK3/PTK2/PRKCD/ARPC4/FCGR3A/BAIAP2/CDC42/GRB2/ARPC3/MYO5A/PIK3R2/ABI2/ACTR3/ARPC1B/NCKAP1/BRK1/ELMO2/CRK/PRKCE/ACTR2/ELMO1/ARPC1A/MYH9	33
BAIAP3	0	0.434167	0.908	0.689	0	0	GO:0050768	negative regulation of neurogenesis	79/2012	295/18866	4.80611e-15	6.38251e-13	4.73753e-13	SPP1/YWHAH/THY1/CNTN2/NKX6-2/CALR/APP/APOE/RTN4/MAG/B2M/LPAR1/GDI1/ID4/LINGO1/MAP2/STMN2/SPOCK1/ATP1B2/CX3CL1/SEMA3D/ARHGDIA/DAAM2/RTN4R/ADGRG1/DPYSL3/SEMA4D/EDNRB/SOX10/SIRT2/OLIG2/CDK5R1/ITM2C/PAFAH1B1/PTK2/RUFY3/SOX8/TNR/TSPO/SEMA4F/SEMA4A/THRB/SEMA3E/DENND5A/RTN4RL2/PTEN/RAP1GAP2/EFNB3/FEZF2/DIXDC1/BRINP1/PLK2/SYT4/BMERB1/CTNNB1/NLGN3/SPART/BCL11A/FKBP4/NR1D1/SEMA6B/IFRD1/PSEN1/CERS2/ARHGEF2/…	79	hsa05170	Human immunodeficiency virus 1 infection	43/1041	212/8112	0.00133025	0.00945956	0.0067835	MAPK1/CALR/CALM3/PRKCG/MAP2K1/GNAO1/CALM1/CALM2/CFL1/B2M/B2M/GNG2/PPP3CB/HLA-B/HLA-B/HLA-B/HLA-B/HLA-B/HLA-B/PAK1/HLA-A/HLA-A/HLA-A/HLA-A/HLA-A/HLA-A/HLA-A/HLA-A/RAC1/MAPK3/PTK2/HRAS/HRAS/PDIA3/SKP1/BST2/GNG7/GNG3/GNB1/BTRC/PAK3/ELOB/GNAI1/PIK3R2/GNAQ/CRKL/JUN/CFL2/SAMHD1/RBX1/PPP3R1/CRK/BCL2L1/MAPK14/FBXW11/AP1S1/TAPBP/TAPBP/TAPBP/TAPBP/TAPBP	43	R-HSA-437239	Recycling pathway of L1	23/1351	47/10704	1.386e-09	4.18265e-08	2.67799e-08	TUBA1A/MAPK1/TUBA1B/TUBB4A/SH3GL2/TUBB2A/ACTB/DPYSL2/SHTN1/AP2M1/DNM1/TUBB3/CLTC/CLTA/AP2S1/AP2B1/TUBA4A/RDX/RPS6KA2/AP2A2/L1CAM/DNM2/TUBB2B	23
LY6H	0	0.432878	0.994	0.939	0	0	GO:0006836	neurotransmitter transport	67/2012	229/18866	5.47232e-15	7.10926e-13	5.27697e-13	SLC17A7/SYN2/BAIAP3/SNCA/SYP/CALM3/SNCG/PRKCG/NAPB/SYT1/STX1A/SYN1/GPM6B/ATP2A2/SLC6A8/ATP1A2/KCNMB4/VAMP2/STXBP1/RAB3B/SV2B/NCS1/BACE1/SV2A/ARL6IP5/HSPA8/GIT1/NAPA/SYT5/SYT17/NRXN2/APBA1/ERC2/DTNBP1/CPLX3/SYNGR3/DOC2A/CHRNB2/SYT4/DNAJC5/PIP5K1C/SLC6A15/PREPL/STX4/SYNJ1/PPT1/ADCY1/PSEN1/PTPRN2/PCLO/DVL1/TSPOAP1/NF1/HRH3/CADPS/STXBP3/SYT7/CDK5/RAB5A/PPFIA2/RAB3GAP1/PPFIA3/FLOT1/RHOT1/APBA2/GABRA2/…	67	hsa04910	Insulin signaling pathway	30/1041	137/8112	0.00204392	0.0139161	0.00997929	MAPK1/CALM3/MAP2K1/CALM1/CALM2/RPS6/PRKAR1A/ELK1/MAPK3/HRAS/HRAS/PRKACB/HK1/PRKCZ/GRB2/PPP1CA/PPP1CC/PRKAR1B/PIK3R2/CRKL/FASN/PPP1CB/PRKAG2/EXOC7/SREBF1/CRK/MKNK2/FLOT1/FLOT1/FLOT1/FLOT1/FLOT1/FLOT1/FLOT1/FLOT1/PTPRF/EIF4E/FLOT2	30	R-HSA-442755	Activation of NMDA receptors and postsynaptic events	34/1351	93/10704	2.89047e-09	8.53316e-08	5.46345e-08	TUBA1A/MAPK1/TUBA1B/CALM3/CAMK2D/TUBB4A/TUBB2A/CALM1/CALM2/GRIA1/NEFL/PRKAR1A/TUBB3/MAPT/RAC1/MAPK3/CAMK1/HRAS/GRIN2B/GIT1/PRKACB/APBA1/GRIA2/DLG2/DLG1/PRKAR1B/GRIA3/ADCY1/GRIN1/TUBA4A/PRKAG2/CAMK2B/RPS6KA2/TUBB2B	34
SCN3B	0	0.432334	0.952	0.796	0	0	GO:0050803	regulation of synapse structure or activity	69/2012	240/18866	5.6843e-15	7.22753e-13	5.36476e-13	TUBA1A/SLC17A7/SNCA/YWHAZ/CLSTN2/APP/TUBB/APOE/GPM6A/SLIT1/CFL1/PRNP/CLSTN1/CAMKV/DNM1/DCTN1/NEUROD2/SEMA4D/GAP43/KIF1A/ADGRL3/CDK5R1/NRCAM/SRCIN1/DBNL/PAFAH1B1/PTK2/CAMK1/HSPA8/OPA1/GRIN2B/SEMA4A/LRRTM1/BAIAP2/CDC42/CDH8/PAK3/EIF4G1/PTEN/NECTIN1/NLGN2/CHRNB2/NLGN3/ABI2/ADGRB2/NEURL1/CRKL/CLSTN3/PPT1/GRIN1/ETV5/SHISA7/RHOA/CAMK2B/SYNGAP1/CDKL5/ADGRB3/LRRTM2/PTPRD/CDK5/TANC2/SLITRK1/ACTR2/PPFIA2/M…	69	hsa05135	Yersinia infection	30/1041	137/8112	0.00204392	0.0139161	0.00997929	MAPK1/MAP2K1/ACTB/ARPC5/RAC1/MAPK3/PTK2/ARPC4/BCAR1/BCAR1/BAIAP2/CDC42/ARPC3/ACTR3B/PIK3R2/PIP5K1C/ACTR3/ARPC1B/GNAQ/CRKL/JUN/RHOG/RHOA/ELMO2/RPS6KA2/CRK/ACTR2/MAPK14/MAP2K4/ELMO1/ARPC1A	30	R-HSA-1445148	Translocation of SLC2A4 (GLUT4) to the plasma membrane	29/1351	72/10704	3.16015e-09	9.13082e-08	5.8461e-08	TUBA1A/YWHAZ/YWHAH/TUBA1B/CALM3/TUBB4A/YWHAB/TUBB2A/YWHAG/CALM1/ACTB/YWHAE/CALM2/YWHAQ/VAMP2/TUBB3/RAC1/MYO5A/LNPEP/STX4/KIFAP3/TUBA4A/PRKAG2/STXBP3/EXOC7/EXOC5/RAB4A/MYH9/TUBB2B	29
PLPPR4	0	0.429613	0.627	0.269	0	0	GO:1990778	protein localization to cell periphery	86/2012	340/18866	1.11738e-14	1.39114e-12	1.03259e-12	SCN3B/ATP2B4/NSF/ACTB/ANK2/ABCA2/PRNP/S100A10/CLSTN1/ATP1B1/AP2M1/FCER1G/SPTBN1/CACNG3/CD81/VAMP2/KIF1B/RACK1/STXBP1/NFASC/RAB3B/BSG/CLTC/HRAS/PACSIN1/CLIP3/BAG4/TTC7B/RAB3C/MAL/TREM2/ANK3/RAB40B/CLASP2/ZDHHC23/PICALM/GOLGA7/PRKCZ/STX7/PALM/TMEM59/TMBIM1/MAP7/MYO5A/GNAI1/DLG2/DLG1/SYTL2/FLNA/TMED2/IQSEC2/SQSTM1/PREPL/EFR3A/RAB8B/KCNIP3/STX4/GRIN1/EFR3B/RHOG/RABEP1/C16orf70/PID1/TUB/RDX/AKAP5/EHD3…	86	hsa05032	Morphine addiction	22/1041	91/8112	0.00213631	0.0142053	0.0101867	GABRA5/PRKCG/GNAO1/GNG2/PDE2A/PDE1A/GABBR1/GABBR1/GABBR1/GABBR1/GABBR1/GABBR1/GABBR1/ARRB2/GNG7/PRKACB/GNG3/KCNJ9/GNB1/PDE1C/GABRB3/GNAI1/ADORA1/GABBR2/ADCY1/ADCY5/GRK3/GABRA2	22	R-HSA-194315	Signaling by Rho GTPases	101/1351	455/10704	4.59488e-09	1.29997e-07	8.32319e-08	TUBA1A/PPP1R14A/YWHAZ/YWHAH/MAPK1/TUBA1B/CALM3/TUBB4A/YWHAB/TUBB2A/YWHAG/CALM1/ACTB/YWHAE/CALM2/CFL1/GDI1/DYNLL1/YWHAQ/XPO1/PAK1/ARHGDIA/PPP2CB/MYL6/ARPC5/PFN1/TUBB3/ARHGDIG/CYFIP2/RAC1/PAFAH1B1/CYBA/MAPK3/PTK2/CHN1/ABR/DYNLL2/KLC1/PPP2CA/PRKCD/FMNL2/ARPC4/EVL/ARHGDIB/RTKN/PREX1/RANGAP1/BAIAP2/DYNC1LI2/CLASP2/CDC42/TAOK1/PAK3/PRKCZ/GRB2/ARHGAP23/ARPC3/S100A8/RHOU/DYNC1H1/ARHGAP21/NUDC/CTNNB1/PPP1…	101
SNCA	0	0.429237	0.967	0.863	0	0	GO:0007269	neurotransmitter secretion	56/2012	175/18866	1.39559e-14	1.66801e-12	1.23811e-12	SYN2/BAIAP3/SNCA/SYP/CALM3/SNCG/PRKCG/NAPB/SYT1/STX1A/SYN1/ATP2A2/KCNMB4/VAMP2/STXBP1/NCS1/BACE1/SV2A/HSPA8/GIT1/NAPA/SYT5/SYT17/NRXN2/APBA1/ERC2/DTNBP1/CPLX3/DOC2A/CHRNB2/SYT4/DNAJC5/PIP5K1C/PREPL/STX4/SYNJ1/PPT1/ADCY1/PSEN1/PTPRN2/PCLO/DVL1/TSPOAP1/NF1/HRH3/CADPS/STXBP3/SYT7/CDK5/RAB5A/PPFIA2/RAB3GAP1/PPFIA3/RHOT1/APBA2/RAP1A	56	hsa04724	Glutamatergic synapse	26/1041	114/8112	0.00217518	0.0142053	0.0101867	SLC17A7/MAPK1/PRKCG/GNAO1/GRIA1/GNG2/PPP3CB/GLS/MAPK3/GRIN2B/GNG7/PRKACB/GNG3/GNB1/GRIA2/GNAI1/GRM3/GNAQ/GRIA3/ADCY1/GRIN1/ADCY5/GRM5/PLA2G4C/PPP3R1/GRK3	26	R-HSA-8856688	Golgi-to-ER retrograde transport	42/1351	133/10704	7.03293e-09	1.94913e-07	1.24795e-07	TUBA1A/TUBA1B/TUBB4A/NSF/NAPB/TUBB2A/ARF1/DYNLL1/RAB6B/DCTN1/ARF3/KIF3C/TUBB3/KIF1A/KIF1B/CAPZB/TMED9/PAFAH1B1/DYNLL2/KLC1/KIF1C/NAPA/KIF21B/DYNC1LI2/DCTN5/DYNC1H1/SURF4/CAPZA1/TMED2/RAB6A/KIFAP3/TUBA4A/DYNC1I1/ACTR1A/NBAS/RAB3GAP1/TMED7/KIF5B/RAB1A/NAPG/COPA/TUBB2B	42
HIPK2	0	0.424305	0.77	0.58	0	0	GO:0099643	signal release from synapse	56/2012	175/18866	1.39559e-14	1.66801e-12	1.23811e-12	SYN2/BAIAP3/SNCA/SYP/CALM3/SNCG/PRKCG/NAPB/SYT1/STX1A/SYN1/ATP2A2/KCNMB4/VAMP2/STXBP1/NCS1/BACE1/SV2A/HSPA8/GIT1/NAPA/SYT5/SYT17/NRXN2/APBA1/ERC2/DTNBP1/CPLX3/DOC2A/CHRNB2/SYT4/DNAJC5/PIP5K1C/PREPL/STX4/SYNJ1/PPT1/ADCY1/PSEN1/PTPRN2/PCLO/DVL1/TSPOAP1/NF1/HRH3/CADPS/STXBP3/SYT7/CDK5/RAB5A/PPFIA2/RAB3GAP1/PPFIA3/RHOT1/APBA2/RAP1A	56	hsa04070	Phosphatidylinositol signaling system	23/1041	97/8112	0.00224762	0.0143848	0.0103154	PIP4K2A/CALM3/PRKCG/CALM1/CALM2/PIP4K2B/PIP4K2B/DGKZ/PI4KA/SYNJ2/PTEN/PTEN/PIK3R2/PIP5K1C/ITPKB/SYNJ1/CDS2/IP6K2/PLCD3/DGKG/ITPK1/ITPK1/INPP4A/MTMR6/SACM1L/CDIPT	23	R-HSA-917937	Iron uptake and transport	25/1351	58/10704	7.35672e-09	1.99808e-07	1.27929e-07	TF/FTL/FTH1/ATP6V0C/UBA52/UBB/ATP6AP1/ATP6V1H/ATP6V1B2/ATP6V1G2/ATP6V1A/ATP6V0E2/ATP6V0A1/ATP6V0B/ATP6V1C1/UBC/ATP6V1E1/ATP6V0D1/SKP1/ATP6V1F/SLC22A17/HMOX2/ATP6V1D/RPS27A/FBXL5	25
ATP2B4	0	0.417218	0.919	0.752	0	0	GO:0051961	negative regulation of nervous system development	82/2012	319/18866	1.77891e-14	2.08446e-12	1.54723e-12	SPP1/YWHAH/THY1/CNTN2/NKX6-2/CALR/APP/APOE/RTN4/SLIT1/MAG/B2M/LPAR1/GDI1/ID4/LINGO1/MAP2/STMN2/SPOCK1/ATP1B2/CX3CL1/SEMA3D/ARHGDIA/DAAM2/RTN4R/NEUROD2/ADGRG1/DPYSL3/SEMA4D/EDNRB/SOX10/SIRT2/OLIG2/CDK5R1/ITM2C/PAFAH1B1/PTK2/RUFY3/SOX8/TNR/TSPO/SEMA4F/PRKACB/SEMA4A/THRB/SEMA3E/DENND5A/RTN4RL2/PTEN/RAP1GAP2/EFNB3/FEZF2/DIXDC1/BRINP1/PLK2/SYT4/BMERB1/CTNNB1/NLGN3/SPART/BCL11A/FKBP4/NR1D1/SEMA6B/IFRD1…	82	hsa04066	HIF-1 signaling pathway	25/1041	109/8112	0.00241665	0.0151633	0.0108737	TF/MAPK1/CAMK2D/PRKCG/LDHA/LDHA/MAP2K1/GAPDH/RPS6/ENO1/MAPK3/PFKP/TIMP1/HK1/VEGFA/ELOB/ENO2/IFNGR1/PIK3R2/PDHA1/RBX1/CAMK2B/EGLN2/PDHB/MKNK2/EIF4E	25	R-HSA-5663213	RHO GTPases Activate WASPs and WAVEs	19/1351	36/10704	7.56293e-09	2.01382e-07	1.28937e-07	MAPK1/ACTB/ARPC5/CYFIP2/RAC1/MAPK3/PTK2/ARPC4/BAIAP2/CDC42/GRB2/ARPC3/ABI2/ACTR3/ARPC1B/NCKAP1/BRK1/ACTR2/ARPC1A	19
MT-ND4	0	0.412327	1	1	0	0	GO:0042176	regulation of protein catabolic process	95/2012	397/18866	1.85678e-14	2.13387e-12	1.5839e-12	GFAP/NUPR1/HSP90AA1/HSPA1A/SNCA/HIPK2/HSP90AB1/TIMP2/PRKCG/DNAJB2/NSF/APOE/OAZ1/UBB/ABCA2/NDFIP1/SNX3/EEF1A1/GJA1/XPO1/RPL5/SIRT2/RPL11/CD81/CLU/RPL23/RACK1/DDRGK1/RAB7A/UQCC2/PTK2/MGAT3/PHB/AGAP2/EEF1A2/RAD23B/ATP5IF1/BCAP31/HMGCR/TIMP1/NRDC/TREM2/BTRC/AZIN1/PTEN/HSPA1B/USP14/PLK2/ZER1/FLNA/GBA/USP5/FBXW7/CTSA/PIN1/HGS/NEDD4L/PSEN1/CEBPA/DYSF/UBE2K/RBX1/GNA12/RDX/DVL1/DESI1/HSPBP1/EGLN2/DDA1/RYB…	95	hsa04971	Gastric acid secretion	19/1041	76/8112	0.00278593	0.0171442	0.0122942	CALM3/CAMK2D/PRKCG/CALM1/ACTB/CALM2/ATP1A3/ATP1B1/ATP1B2/ATP1A2/PRKACB/CA2/SSTR2/GNAI1/GNAQ/ADCY1/ADCY5/CCKBR/CAMK2B	19	R-HSA-187037	Signaling by NTRK1 (TRKA)	38/1351	115/10704	9.08966e-09	2.3738e-07	1.51985e-07	MAPK1/MAP2K1/SH3GL2/YWHAB/ID4/AP2M1/SGK1/DNM1/PPP2CB/CDK5R1/ELK1/MAPK3/CLTC/HRAS/SH3GL3/CLTA/PPP2CA/DNAL4/AP2S1/JUND/AP2B1/GRB2/CDK5R2/PPP2R1A/PIK3R2/CRKL/RHOA/RPS6KA2/DUSP7/CRK/MEF2D/CDK5/AP2A2/MAPK14/VGF/CHD4/DNM2/RAP1A	38
YWHAZ	0	0.408708	0.999	0.99	0	0	GO:0010970	transport along microtubule	53/2012	161/18866	1.91309e-14	2.1571e-12	1.60115e-12	HSPB1/APP/UCHL1/UBB/SOD1/DYNLL1/MAP2/SUN2/CNIH2/NEFL/KIF3C/KIF1A/MAPT/KIF1B/FEZ1/ARL8A/PAFAH1B1/AP3S1/DYNLL2/KIF1C/RAB27B/MAPK8IP3/HSPA8/KIF5C/OPA1/RAB21/LAMP1/RASGRP1/APBA1/CDC42/PRKCZ/DTNBP1/SSNA1/DLG2/DYNC1H1/ARHGAP21/DST/DYNLRB1/ARL8B/RAB6A/SFPQ/AP3B2/AP3M2/KIFAP3/DYNC1I1/TUB/TRAK2/HNRNPU/FBXW11/RHOT1/KIF5B/RAB1A/FLOT2	53	hsa04912	GnRH signaling pathway	22/1041	93/8112	0.00286032	0.0172698	0.0123843	MAPK1/CALM3/CAMK2D/MAP2K1/CALM1/CALM2/ELK1/MAPK3/HRAS/HRAS/ATF4/PRKCD/PRKACB/CDC42/GRB2/GNAQ/ADCY1/JUN/ADCY5/PLA2G4C/CAMK2B/MAPK14/MAP2K4	22	R-HSA-9664407	Parasite infection	25/1351	59/10704	1.12493e-08	2.77755e-07	1.77836e-07	MAPK1/ACTB/ARPC5/CYFIP2/RAC1/MAPK3/PTK2/ARPC4/FCGR3A/BAIAP2/CDC42/GRB2/ARPC3/MYO5A/ABI2/ACTR3/ARPC1B/NCKAP1/BRK1/ELMO2/CRK/ACTR2/ELMO1/ARPC1A/MYH9	25
PEG10	0	0.40677	0.791	0.527	0	0	GO:0050806	positive regulation of synaptic transmission	55/2012	172/18866	2.48311e-14	2.74798e-12	2.03974e-12	BAIAP3/MAPK1/CLSTN2/APP/APOE/SYT1/STX1A/PRNP/SLC8A2/CLSTN1/TYROBP/CACNG3/VAMP2/STXBP1/NPTN/RAB3B/RGS14/GRIN2B/FAM107A/ARRB2/TNR/LRRTM1/CA2/BAIAP2/PRKCZ/PTEN/DTNBP1/NLGN2/CHRNB2/PLK2/RGS4/NLGN3/SQSTM1/ADORA1/CLSTN3/STX4/ADCY1/GRIN1/CALB1/LGMN/MPP2/NCSTN/SHISA7/STAU1/DVL1/NF1/AKAP5/KCTD13/LRRTM2/SYT7/CDK5/PRKCE/RAB3GAP1/FLOT1/KIF5B	55	hsa04979	Cholesterol metabolism	14/1041	50/8112	0.0032211	0.019088	0.0136881	APOC1/APOE/LRPAP1/APOC2/LIPA/NPC2/VDAC1/TSPO/PLTP/VAPA/SORT1/NCEH1/LRP1/VAPB	14	R-HSA-9664417	Leishmania phagocytosis	25/1351	59/10704	1.12493e-08	2.77755e-07	1.77836e-07	MAPK1/ACTB/ARPC5/CYFIP2/RAC1/MAPK3/PTK2/ARPC4/FCGR3A/BAIAP2/CDC42/GRB2/ARPC3/MYO5A/ABI2/ACTR3/ARPC1B/NCKAP1/BRK1/ELMO2/CRK/ACTR2/ELMO1/ARPC1A/MYH9	25
YWHAH	0	0.403778	1	0.997	0	0	GO:0061077	chaperone-mediated protein folding	30/2012	60/18866	2.68736e-14	2.91994e-12	2.16738e-12	HSPB1/CD74/HSPA1A/HSPH1/DNAJB2/PTGES3/FKBP1A/HSPE1/HSPA5/CLU/PPIB/DNAJB1/HSPA8/CHORDC1/HSPA2/PDCD5/CRTAP/HSPA1B/HSPA9/PPID/ST13/DNAJC5/FKBP4/DNAJB4/DNAJC7/CCT2/PDIA4/SGTA/CSNK2A1/FKBP1B	30	hsa04723	Retrograde endocannabinoid signaling	31/1041	148/8112	0.00358935	0.0208113	0.0149239	SLC17A7/GABRA5/MAPK1/PRKCG/GNAO1/GRIA1/GNG2/NDUFS5/NDUFA3/NDUFA3/NDUFA3/NDUFA3/NDUFA3/NDUFA3/NDUFA3/NDUFA3/NDUFA3/NDUFA3/MAPK3/GNG7/PRKACB/GNG3/KCNJ9/GNB1/GRIA2/ABHD6/NDUFC2/GABRB3/GNAI1/FAAH/NDUFA11/GNAQ/NDUFB8/GRIA3/ADCY1/ADCY5/GRM5/MAPK14/NDUFS7/GABRA2	31	R-HSA-9664422	FCGR3A-mediated phagocytosis	25/1351	59/10704	1.12493e-08	2.77755e-07	1.77836e-07	MAPK1/ACTB/ARPC5/CYFIP2/RAC1/MAPK3/PTK2/ARPC4/FCGR3A/BAIAP2/CDC42/GRB2/ARPC3/MYO5A/ABI2/ACTR3/ARPC1B/NCKAP1/BRK1/ELMO2/CRK/ACTR2/ELMO1/ARPC1A/MYH9	25
SYP	0	0.403098	0.999	0.975	0	0	GO:0060560	developmental growth involved in morphogenesis	67/2012	236/18866	2.76112e-14	2.94651e-12	2.1871e-12	SPP1/HSP90AA1/HSP90AB1/CPNE6/APP/SH3GL2/APOE/SYT1/DPYSL2/RTN4/SLIT1/MAG/GDI1/SHTN1/MAP2/SEMA3D/PPP3CB/PAK1/RTN4R/SEMA4D/COBL/SLIT3/MAPT/CDK5R1/CYFIP2/NRCAM/DBNL/PAFAH1B1/RUFY3/FGF1/RAB21/TNR/SEMA4F/SEMA4A/SYT17/SEMA3E/VEGFA/PRKCZ/ZEB2/SLC9A6/RASAL1/SYT4/CTNNB1/NLGN3/SPART/BCL11A/SEMA6B/USP9X/DCLK1/IFRD1/ALCAM/NEDD4L/DVL1/CPNE5/MESP1/FGFR2/LZTS2/LRP1/CDKL5/CDK5/BMPR2/NDN/IST1/PLXNA1/L1CAM/DNM2/DDR1	67	hsa04727	GABAergic synapse	21/1041	89/8112	0.00364197	0.0208113	0.0149239	GABRA5/PRKCG/GNAO1/NSF/NSF/NSF/GNG2/GLS/GABBR1/GABBR1/GABBR1/GABBR1/GABBR1/GABBR1/GABBR1/GNG7/PRKACB/GNG3/GNB1/GABRB3/GNAI1/GABARAPL1/GABARAP/SLC12A5/GABBR2/ADCY1/ADCY5/TRAK2/GABRA2	21	R-HSA-3371571	HSF1-dependent transactivation	15/1351	24/10704	1.30999e-08	3.17674e-07	2.03394e-07	CRYAB/HSP90AA1/HSPA1A/HSP90AB1/CAMK2D/PTGES3/DNAJB1/HSPA8/HSPA2/HSBP1/HSPA1B/FKBP4/HSF1/CAMK2B/HSPB8	15
THY1	0	0.401409	1	0.991	0	0	GO:0010977	negative regulation of neuron projection development	51/2012	154/18866	4.53394e-14	4.75348e-12	3.52835e-12	SPP1/YWHAH/THY1/APOE/RTN4/MAG/B2M/LPAR1/GDI1/LINGO1/MAP2/STMN2/SPOCK1/SEMA3D/ARHGDIA/RTN4R/DPYSL3/SEMA4D/CDK5R1/ITM2C/PAFAH1B1/PTK2/RUFY3/TNR/SEMA4F/SEMA4A/SEMA3E/DENND5A/RTN4RL2/PTEN/RAP1GAP2/EFNB3/PLK2/NLGN3/SPART/BCL11A/FKBP4/SEMA6B/IFRD1/PSEN1/CERS2/RHOA/SYNGAP1/TRAK2/LRP1/CDK5/MDM2/HDAC2/NR2F1/OMG/VIM	51	hsa05010	Alzheimer disease	65/1041	369/8112	0.00423721	0.0237878	0.0170584	TUBA1A/SNCA/MAPK1/TUBA1B/CALM3/TUBB4A/MAP2K1/APP/RTN3/TUBB/TUBB/TUBB/TUBB/TUBB/TUBB/TUBB/TUBB/TUBB2A/GAPDH/APOE/CALM1/RTN4/CALM2/APBB1/NDUFS5/ATP2A2/PPP3CB/NDUFA3/NDUFA3/NDUFA3/NDUFA3/NDUFA3/NDUFA3/NDUFA3/NDUFA3/NDUFA3/NDUFA3/TUBB3/MAPT/MAPT/MAPT/CDK5R1/MAPK3/HRAS/HRAS/BACE1/KLC1/CHRM1/VDAC1/KIF5C/KIF5C/GRIN2B/ATF4/UQCR11/NDUFC2/PSMB4/PPID/CTNNB1/PIK3R2/NDUFA11/GNAQ/NDUFB8/GRIN1/TUBA4A/GRM5/PSEN1…	65	R-HSA-5683057	MAPK family signaling cascades	77/1351	325/10704	1.83373e-08	4.36879e-07	2.79716e-07	HSPB1/PEA15/MAPK1/CALM3/CAMK2D/NCAM1/MAP2K1/YWHAB/UBA52/CALM1/ACTB/UBB/CALM2/SPTBN1/XPO1/PAK1/PPP2CB/SPRED1/NEFL/RAC1/MAPK3/ARL2/PTK2/PHB/HRAS/DNAJB1/FGF1/UBC/ERBB3/PPP2CA/GRIN2B/SPTAN1/ARRB2/PRKACB/PTPRA/ZDHHC9/RASGRP1/CDC42/PAK3/GOLGA7/GRB2/DLG2/RASAL1/PEBP1/PSMB4/DLG1/SEPTIN7/PPP1CC/PPP2R1A/PIK3R2/GRIN1/JUN/PPP1CB/RPS27A/RBX1/CAMK2B/NF1/CNKSR2/SYNGAP1/FGFR2/PSMA4/PSME1/DUSP7/RANBP9/LAMTOR2/PSM…	77
PIP4K2A	0	0.401087	0.648	0.396	0	0	GO:0010721	negative regulation of cell development	85/2012	343/18866	5.5815e-14	5.75087e-12	4.26869e-12	SPP1/YWHAH/THY1/CNTN2/NKX6-2/CALR/APP/APOE/RTN4/MAG/B2M/LPAR1/GDI1/ID4/LINGO1/MAP2/STMN2/SPOCK1/ATP1B2/CX3CL1/SEMA3D/PAK1/ARHGDIA/DAAM2/RTN4R/ADGRG1/DPYSL3/SEMA4D/EDNRB/SOX10/SIRT2/OLIG2/CDK5R1/ITM2C/PAFAH1B1/PTK2/RUFY3/SOX8/TNR/TSPO/SEMA4F/SEMA4A/THRB/SEMA3E/DENND5A/RTN4RL2/VEGFA/PTEN/RAP1GAP2/EFNB3/FEZF2/DIXDC1/BRINP1/PLK2/RGS4/DMTN/SYT4/BMERB1/CTNNB1/NLGN3/SPART/BCL11A/FKBP4/FBXW7/NR1D1/SEMA6B…	85	hsa05163	Human cytomegalovirus infection	43/1041	225/8112	0.00431234	0.0237922	0.0170615	MAPK1/CALR/CALM3/PRKCG/MAP2K1/GNAO1/CALM1/CALM2/B2M/B2M/GNG2/CX3CL1/PPP3CB/HLA-B/HLA-B/HLA-B/HLA-B/HLA-B/HLA-B/HLA-A/HLA-A/HLA-A/HLA-A/HLA-A/HLA-A/HLA-A/HLA-A/PTGER3/RAC1/ELK1/MAPK3/PTK2/HRAS/HRAS/PDIA3/ATF4/GNG7/PRKACB/BCAR1/BCAR1/GNG3/GNB1/VEGFA/GRB2/GNAI1/CTNNB1/PIK3R2/GNAQ/CRKL/ADCY1/ADCY5/GNA12/RHOA/PPP3R1/CRK/MDM2/MAPK14/TAPBP/TAPBP/TAPBP/TAPBP/TAPBP	43	R-HSA-389957	Prefoldin mediated transfer of substrate to CCT/TriC	16/1351	28/10704	2.61109e-08	6.11355e-07	3.91427e-07	TUBA1A/TUBB4A/TUBB2A/ACTB/TUBB3/CCT5/VBP1/PFDN6/TCP1/PFDN5/TUBA4A/CCT2/PFDN2/CCT7/CCT3/TUBB2B	16
TMSB4X	0	0.399111	1	1	0	0	GO:0031647	regulation of protein stability	77/2012	296/18866	5.71127e-14	5.78483e-12	4.29389e-12	CRYAB/TF/HSP90AA1/HSPA1A/SNCA/MAPK1/HSP90AB1/CALR/PTGES3/SERF2/GAPDH/RTN4/ANK2/PRNP/HSPD1/ATP1B1/ATP1B2/LAMP2/TYROBP/RPL5/RPL11/CD81/PFN1/CLU/RPL23/PPIB/DDRGK1/STXBP1/PHB/CAPN3/RASSF2/HSPA8/SUGT1/FAM107A/PRKCD/BAG4/GRN/LAMP1/KAT2A/SEL1L/BTRC/CCT5/CHP1/GOLGA7/PTEN/CRTAP/HSPA1B/TCP1/FLNA/FBXW7/NR1D1/CTSA/PIN1/USP9X/GNAQ/NEDD4L/CCT2/DVL1/DERL1/UBE2B/SREBF1/TMEM25/TARDBP/USP7/FBXL3/FLOT1/MDM2/FBXW11/…	77	hsa04137	Mitophagy - animal	17/1041	68/8112	0.00454776	0.0246658	0.017688	UBA52/UBB/RAB7A/HRAS/HRAS/UBC/ATF4/GABARAPL1/BNIP3/GABARAP/ATG9A/SQSTM1/SQSTM1/JUN/RPS27A/BCL2L1/CSNK2A1/RHOT1/BNIP3L	17	R-HSA-166520	Signaling by NTRKs	41/1351	134/10704	2.92201e-08	6.72558e-07	4.30612e-07	MAPK1/MAP2K1/SH3GL2/YWHAB/ID4/AP2M1/SGK1/DNM1/PPP2CB/CDK5R1/RAC1/ELK1/MAPK3/CLTC/HRAS/SH3GL3/CLTA/PPP2CA/GRIN2B/DNAL4/AP2S1/JUND/AP2B1/PCSK6/GRB2/CDK5R2/PPP2R1A/PIK3R2/CRKL/RHOA/RPS6KA2/DUSP7/CRK/MEF2D/CDK5/AP2A2/MAPK14/VGF/CHD4/DNM2/RAP1A	41
NPY	0	0.397652	0.372	0.119	0	0	GO:0001505	regulation of neurotransmitter levels	66/2012	235/18866	7.55106e-14	7.52086e-12	5.58249e-12	SLC17A7/SYN2/BAIAP3/SNCA/SYP/CALM3/SNCG/PRKCG/NAPB/SYT1/STX1A/SYN1/GPM6B/MAOB/ATP2A2/ATP1A2/KCNMB4/VAMP2/STXBP1/RAB3B/NCS1/BACE1/SV2A/ARL6IP5/HSPA8/GIT1/NAPA/SYT5/SYT17/NRXN2/APBA1/ERC2/DTNBP1/CPLX3/SYNGR3/DOC2A/CHRNB2/SYT4/DNAJC5/PIP5K1C/PREPL/STX4/SYNJ1/PPT1/ADCY1/PSEN1/PTPRN2/PCLO/DVL1/TSPOAP1/NF1/HRH3/CADPS/STXBP3/SYT7/CDK5/COMT/RAB5A/PPFIA2/RAB3GAP1/PPFIA3/FLOT1/RHOT1/APBA2/GABRA2/RAP1A	66	hsa04510	Focal adhesion	39/1041	201/8112	0.00489575	0.0261107	0.0187241	SPP1/MAPK1/PRKCG/MAP2K1/ACTB/PAK1/RAC1/ELK1/MAPK3/PTK2/HRAS/HRAS/ITGB4/TNR/BCAR1/BCAR1/CDC42/VEGFA/PAK3/PTEN/PTEN/GRB2/PPP1CA/CTNNB1/PPP1CC/FLNA/PIK3R2/PIP5K1C/CRKL/JUN/PPP1CB/PARVB/TLN2/RHOA/CRK/ITGB8/ARHGAP35/CCND2/TLN1/MYL12B/MYL9/RAP1A	39	R-HSA-3371568	Attenuation phase	11/1351	14/10704	3.15476e-08	7.0867e-07	4.53733e-07	HSP90AA1/HSPA1A/HSP90AB1/PTGES3/DNAJB1/HSPA8/HSPA2/HSBP1/HSPA1B/FKBP4/HSF1	11
MAPK1	0	0.394695	0.968	0.88	0	0	GO:0048488	synaptic vesicle endocytosis	30/2012	62/18866	8.26978e-14	7.971e-12	5.91661e-12	SLC17A7/SNCA/SYP/CALM3/SNCG/SH3GL2/DNAJC6/CANX/SYT1/ACTB/STX1A/PPP3CB/DNM1/SNAP91/VAMP2/PACSIN1/RAB27B/SYT5/SYNJ2/PICALM/NLGN2/NLGN3/AMPH/PIP5K1C/BTBD9/SYNJ1/KIAA1109/SYT7/CDK5/DNM2	30	hsa05418	Fluid shear stress and atherosclerosis	29/1041	139/8112	0.00504373	0.0264589	0.0189738	HSP90AA1/HSP90B1/HSP90AB1/CALM3/CALM1/ACTB/CALM2/MGST1/TXN/RAC1/CYBA/PTK2/NQO1/VEGFA/PRKCZ/CTNNB1/PIK3R2/SQSTM1/SQSTM1/JUN/ARHGEF2/MGST3/RHOA/GSTP1/TXN2/SUMO3/BMPR2/MAPK14/MAP2K4/KEAP1	29	R-HSA-391251	Protein folding	34/1351	101/10704	3.23546e-08	7.0867e-07	4.53733e-07	TUBA1A/TUBA1B/TUBB4A/GNAO1/TUBB2A/ACTB/GNG2/GNAZ/TUBB3/TBCB/ARL2/GNG7/GNG3/GNB1/CCT5/VBP1/GNAI1/PFDN6/TCP1/GBA/FBXW7/PFDN5/TUBA4A/CCT2/FBXL5/DCAF7/NOP56/FBXW4/FBXL3/CSNK2A1/PFDN2/CCT7/CCT3/TUBB2B	34
PGRMC1	0	0.394657	0.937	0.808	0	0	GO:0140238	presynaptic endocytosis	30/2012	62/18866	8.26978e-14	7.971e-12	5.91661e-12	SLC17A7/SNCA/SYP/CALM3/SNCG/SH3GL2/DNAJC6/CANX/SYT1/ACTB/STX1A/PPP3CB/DNM1/SNAP91/VAMP2/PACSIN1/RAB27B/SYT5/SYNJ2/PICALM/NLGN2/NLGN3/AMPH/PIP5K1C/BTBD9/SYNJ1/KIAA1109/SYT7/CDK5/DNM2	30	hsa04925	Aldosterone synthesis and secretion	22/1041	98/8112	0.00561547	0.0289831	0.0207839	ATP2B4/CALM3/CAMK2D/PRKCG/CALM1/CALM2/ATP1A3/ATP1B1/ATP1B2/ATP1A2/PDE2A/CAMK1/ATF4/PRKACB/CACNA1I/GNAQ/ADCY1/ADCY5/CAMK2B/ATP2B3/ATP2B1/PRKCE	22	R-HSA-6807878	COPI-mediated anterograde transport	34/1351	101/10704	3.23546e-08	7.0867e-07	4.53733e-07	TUBA1A/TUBA1B/TUBB4A/NSF/NAPB/TUBB2A/ANK2/ARF1/DYNLL1/SPTBN1/DCTN1/ARF3/TUBB3/CAPZB/TMED9/DYNLL2/SPTAN1/NAPA/ANK3/DYNC1LI2/DCTN5/DYNC1H1/CAPZA1/TMED2/COG1/TUBA4A/DYNC1I1/ACTR1A/YKT6/TMED7/RAB1A/NAPG/COPA/TUBB2B	34
CNTN2	0	0.393762	0.558	0.286	0	0	GO:0010001	glial cell differentiation	65/2012	230/18866	8.47011e-14	8.03451e-12	5.96375e-12	PLP1/C1QA/CNP/MAPK1/CNTN2/NKX6-2/MAP2K1/APP/TPPP/SOD1/BIN1/MAG/ABCA2/LPAR1/MYRF/ID4/CD9/DAAM2/BOK/SOX10/SIRT2/GAP43/OPALIN/CLU/MAPT/OLIG2/PTPRZ1/MAPK3/OLIG1/FA2H/ZNF488/ERBB3/SOX8/IL34/GRN/TREM2/NDRG1/PTEN/IFNGR1/HDAC11/WDR1/S100A8/CTNNB1/NLGN3/BNIP3/NR1D1/PSEN1/METRN/TENM4/NFIB/NCSTN/S100A9/RHOA/NF1/NFE2L1/GSTP1/CNTNAP1/LRP1/DNER/POU3F2/CDK5/SLC25A46/HDAC2/CDH2/VIM	65	hsa04010	MAPK signaling pathway	53/1041	294/8112	0.00582967	0.029611	0.0212342	HSPB1/HSPA1A/HSPA1A/HSPA1A/HSPA1A/HSPA1A/MAP4K4/MAPK1/PRKCG/STMN1/MAP2K1/CACNA1E/PPP3CB/PAK1/CACNG3/MAPK8IP1/MAPT/MAPT/MAPT/RAC1/PTPRR/ELK1/MAPK3/CACNA2D1/HRAS/HRAS/FGF1/CSF1R/ERBB3/MAPK8IP3/HSPA8/ATF4/ARRB2/PRKACB/HSPA2/RASGRP1/CDC42/VEGFA/TAOK1/JUND/HSPA1B/HSPA1B/HSPA1B/HSPA1B/HSPA1B/GRB2/CACNB1/FLNA/CACNA1I/CRKL/JUN/PLA2G4C/GNA12/NF1/FGFR2/RPS6KA2/DUSP7/PPP3R1/CRK/MKNK2/MAPK14/MAP2K4/PPM1B/RAP…	53	R-HSA-389958	Cooperation of Prefoldin and TriC/CCT in actin and tubulin folding	17/1351	32/10704	4.15012e-08	8.94581e-07	5.72765e-07	TUBA1A/TUBA1B/TUBB4A/TUBB2A/ACTB/TUBB3/CCT5/VBP1/PFDN6/TCP1/PFDN5/TUBA4A/CCT2/PFDN2/CCT7/CCT3/TUBB2B	17
HSP90AB1	0	0.393678	1	1	0	0	GO:0016358	dendrite development	68/2012	247/18866	9.12907e-14	8.52426e-12	6.32728e-12	YWHAH/APP/APOE/CFL1/LPAR1/ARF1/MAP2/NSMF/SEMA4D/COBL/KIF1A/CTNND2/CDK5R1/SRCIN1/DBNL/PAFAH1B1/CAMK1/PACSIN1/FARP1/OPA1/MATN2/RAB21/PREX1/BAIAP2/ACSL4/CDC42/PICALM/PAK3/PTEN/DTNBP1/SLC9A6/FEZF2/CHRNB2/PLK2/IQSEC1/NLGN3/BCL11A/ABI2/SLC12A5/NEURL1/CRKL/DCLK1/TMEFF1/GRIN1/NEDD4L/PSEN1/DVL1/RHOA/CAMK2B/CELSR2/SYNGAP1/SRGAP2/TRAK2/CDKL5/ADGRB3/PTPRD/CRK/CDK5/SLC25A46/TANC2/ACTR2/PPFIA2/RAP2A/ADAM10/HDA…	68	hsa04964	Proximal tubule bicarbonate reclamation	8/1041	23/8112	0.00592936	0.0296468	0.0212599	ATP1A3/ATP1B1/AQP1/ATP1B2/ATP1A2/GLS/CA2/GLUD1	8	R-HSA-9646399	Aggrephagy	20/1351	43/10704	4.93302e-08	1.04673e-06	6.70177e-07	TUBA1A/HSP90AA1/TUBA1B/TUBB4A/TUBB2A/UBA52/UBB/DYNLL1/TUBB3/DYNLL2/UBC/DYNC1LI2/DYNC1H1/UBE2N/TUBA4A/RPS27A/DYNC1I1/HSF1/VIM/TUBB2B	20
CLSTN2	0	0.390163	0.622	0.3	0	0	GO:0001558	regulation of cell growth	97/2012	420/18866	1.01928e-13	9.37113e-12	6.95588e-12	CRYAB/SPP1/HSPA1A/CPNE6/CAMK2D/DNAJB2/APOE/SYT1/DPYSL2/RTN4/MAG/GDI1/MEG3/CLSTN1/SHTN1/MAP2/SPOCK1/APBB1/GJA1/MTPN/SEMA3D/SGK1/PAK1/RTN4R/SEMA4D/ENO1/SLIT3/MAPT/EIF4G2/RACK1/CDK5R1/NRCAM/DBNL/PAFAH1B1/CYBA/CCDC85B/PHB/RUFY3/DACT3/IGFBP5/ADIPOR1/PPP2CA/FAM107A/RAB21/BST2/TNR/SEMA4F/SEMA4A/BCAR1/SYT17/SEMA3E/KRT17/CDC42/VEGFA/EIF4G1/HSPA1B/S100A8/RASAL1/RGS4/SYT4/PPP2R1A/SPART/BCL11A/ADIPOR2/SEMA6B…	97	hsa05230	Central carbon metabolism in cancer	17/1041	70/8112	0.00622244	0.0301987	0.0216556	MAPK1/LDHA/LDHA/MAP2K1/PKM/GLS/MAPK3/HRAS/HRAS/PGAM2/PFKP/HK1/PTEN/PTEN/PIK3R2/SLC7A5/PDHA1/PGAM1/FGFR2/PDHB	17	R-HSA-9637690	Response of Mtb to phagocytosis	14/1351	23/10704	6.57824e-08	1.37435e-06	8.7994e-07	MAPK1/UBA52/UBB/CORO1A/ATP6V1H/ENO1/RAB7A/MAPK3/UBC/SFPQ/HGS/RPS27A/RAB5A/KPNB1	14
HSPH1	0	0.388685	0.887	0.772	0	0	GO:0098930	axonal transport	29/2012	59/18866	1.27982e-13	1.15881e-11	8.6015e-12	HSPB1/UCHL1/SOD1/MAP2/CNIH2/NEFL/KIF1A/MAPT/KIF1B/FEZ1/ARL8A/PAFAH1B1/AP3S1/KIF1C/RAB27B/MAPK8IP3/KIF5C/OPA1/RAB21/DTNBP1/DLG2/DYNC1H1/DST/ARL8B/AP3B2/AP3M2/TRAK2/FBXW11/KIF5B	29	hsa05323	Rheumatoid arthritis	21/1041	93/8112	0.0062667	0.0301987	0.0216556	HLA-DRA/HLA-DRA/HLA-DRA/HLA-DRA/HLA-DRA/HLA-DRA/HLA-DRA/ATP6V0C/ATP6AP1/ATP6V1H/ITGB2/ATP6V1B2/ATP6V1G2/ATP6V1G2/ATP6V1G2/ATP6V1G2/ATP6V1G2/ATP6V1G2/ATP6V1G2/ATP6V1A/ATP6V0E2/ATP6V0A1/ATP6V0B/ATP6V1C1/ATP6V1E1/ATP6V0D1/ATP6V1F/HLA-DPB1/HLA-DPB1/HLA-DPB1/HLA-DPB1/HLA-DPB1/HLA-DPB1/HLA-DPB1/HLA-DPB1/VEGFA/HLA-DRB1/HLA-DRB1/HLA-DRB1/HLA-DRB1/HLA-DRB1/HLA-DRB1/HLA-DPA1/HLA-DPA1/HLA-DPA1/HLA-DPA1/HLA-…	21	R-HSA-9663891	Selective autophagy	29/1351	81/10704	7.15284e-08	1.47175e-06	9.42304e-07	TUBA1A/HSP90AA1/TUBA1B/TUBB4A/TUBB2A/UBA52/UBB/DYNLL1/MAP1LC3A/TUBB3/DYNLL2/UBC/VDAC1/HSPA8/DYNC1LI2/DYNC1H1/SQSTM1/TOMM70/UBE2N/TUBA4A/RPS27A/DYNC1I1/HSF1/PRKAG2/TOMM22/TOMM20/CSNK2A1/VIM/TUBB2B	29
FXYD6	0	0.384403	0.994	0.955	0	0	GO:0010976	positive regulation of neuron projection development	75/2012	290/18866	1.67844e-13	1.49707e-11	1.11122e-11	CPNE6/MAP2K1/APOE/SYT1/LPAR1/GDI1/ARF1/CNTN1/SNX3/SHTN1/STMN2/APBB1/ATP1B2/CX3CL1/ENC1/PAK1/ARHGDIA/DPYSL3/SEMA4D/HSPA5/COBL/NEFL/MAPT/FEZ1/NDRG4/NPTN/DBNL/PAFAH1B1/CAMK1/RUFY3/TMEM30A/PACSIN1/ATP8A2/SERPINI1/OPA1/RAB21/PLXNB1/GRN/SYT17/BAIAP2/VEGFA/PAK3/TENM3/ZEB2/RASAL1/SYT4/PLXND1/NEURL1/NEDD4L/LRRC7/PSEN1/METRN/PLXNC1/S100A9/DVL1/RHOA/CPNE5/CAMK2B/LRP1/NEGR1/CDKL5/PTPRD/ARHGAP35/SLITRK1/BMPR2…	75	hsa04370	VEGF signaling pathway	15/1041	59/8112	0.00632284	0.0301987	0.0216556	HSPB1/MAPK1/PRKCG/MAP2K1/PPP3CB/RAC1/MAPK3/PTK2/HRAS/HRAS/CDC42/VEGFA/PIK3R2/PLA2G4C/PPP3R1/MAPK14	15	R-HSA-390466	Chaperonin-mediated protein folding	32/1351	95/10704	8.04485e-08	1.63058e-06	1.044e-06	TUBA1A/TUBA1B/TUBB4A/GNAO1/TUBB2A/ACTB/GNG2/GNAZ/TUBB3/GNG7/GNG3/GNB1/CCT5/VBP1/GNAI1/PFDN6/TCP1/GBA/FBXW7/PFDN5/TUBA4A/CCT2/FBXL5/DCAF7/NOP56/FBXW4/FBXL3/CSNK2A1/PFDN2/CCT7/CCT3/TUBB2B	32
CPNE6	0	0.382807	0.74	0.412	0	0	GO:0051402	neuron apoptotic process	67/2012	245/18866	1.96272e-13	1.72488e-11	1.28032e-11	NUPR1/SOD2/GABRA5/HIPK2/HSP90AB1/PRKCG/APP/FAIM2/GAPDH/APOE/SOD1/MAG/PRNP/HSPD1/CORO1A/CX3CL1/NSMF/TRIM2/TYROBP/BOK/HSPA5/NEFL/PTPRZ1/STXBP1/CDK5R1/AGAP2/HRAS/BACE1/ERBB3/ATF4/ARRB2/THRB/NQO1/CDC34/GRN/SET/CDC42/PAK3/HYOU1/GABRB3/CHL1/TYRO3/CTNNB1/BNIP3/DNAJC5/FBXW7/PIN1/PPT1/GRIN1/JUN/PSEN1/LGMN/NCSTN/RHOA/PARP1/NF1/EGLN2/SYNGAP1/PIGT/LRP1/RETREG1/CDK5/NRBP2/HDAC4/BCL2L1/SNX6/MAP2K4	67	hsa05133	Pertussis	18/1041	76/8112	0.00654651	0.0308071	0.0220919	C1QB/C1QA/C3/C1QC/MAPK1/CALM3/CALM1/CALM2/CFL1/ITGB2/C1R/C1R/MAPK3/C1S/GNAI1/JUN/CFL2/RHOA/MAPK14	18	R-HSA-5673001	RAF/MAP kinase cascade	67/1351	280/10704	1.04494e-07	2.08682e-06	1.33611e-06	PEA15/MAPK1/CALM3/CAMK2D/NCAM1/MAP2K1/YWHAB/UBA52/CALM1/ACTB/UBB/CALM2/SPTBN1/PPP2CB/SPRED1/NEFL/MAPK3/ARL2/PTK2/PHB/HRAS/FGF1/UBC/ERBB3/PPP2CA/GRIN2B/SPTAN1/ARRB2/PTPRA/ZDHHC9/RASGRP1/GOLGA7/GRB2/DLG2/RASAL1/PEBP1/PSMB4/DLG1/PPP1CC/PPP2R1A/PIK3R2/GRIN1/PPP1CB/RPS27A/RBX1/CAMK2B/NF1/CNKSR2/SYNGAP1/FGFR2/PSMA4/PSME1/DUSP7/RANBP9/LAMTOR2/PSMD10/BCL2L1/PSMD4/TLN1/CUL3/PSMD3/PSMB7/PPP2R5C/PSMB10/PSMF…	67
TIMP2	0	0.381221	0.931	0.798	0	0	GO:0050807	regulation of synapse organization	64/2012	229/18866	2.30479e-13	1.99615e-11	1.48168e-11	TUBA1A/SNCA/YWHAZ/CLSTN2/APP/TUBB/APOE/GPM6A/SLIT1/CFL1/PRNP/CLSTN1/CAMKV/DCTN1/NEUROD2/SEMA4D/GAP43/KIF1A/ADGRL3/CDK5R1/NRCAM/SRCIN1/DBNL/PAFAH1B1/PTK2/CAMK1/HSPA8/OPA1/GRIN2B/SEMA4A/LRRTM1/BAIAP2/CDC42/CDH8/PAK3/EIF4G1/PTEN/NECTIN1/NLGN2/CHRNB2/NLGN3/ABI2/ADGRB2/NEURL1/CRKL/CLSTN3/GRIN1/ETV5/SHISA7/RHOA/CAMK2B/CDKL5/ADGRB3/LRRTM2/PTPRD/CDK5/TANC2/SLITRK1/ACTR2/PPFIA2/MAPK14/ADAM10/CDH2/LRRC4B	64	hsa04611	Platelet activation	26/1041	124/8112	0.00717097	0.0332567	0.0238485	MAPK1/ACTB/FCER1G/MAPK3/PRKACB/STIM1/RASGRP1/PRKCZ/GNAI1/PPP1CA/GUCY1B1/PPP1CC/PIK3R2/GNAQ/ADCY1/PPP1CB/GP1BB/ADCY5/PLA2G4C/TLN2/RHOA/ARHGAP35/MAPK14/TLN1/MYL12B/RAP1A	26	R-HSA-9635486	Infection with Mycobacterium tuberculosis	15/1351	27/10704	1.20061e-07	2.35654e-06	1.5088e-06	MAPK1/UBA52/UBB/B2M/CORO1A/ATP6V1H/ENO1/RAB7A/MAPK3/UBC/SFPQ/HGS/RPS27A/RAB5A/KPNB1	15
PMP2	0	0.378872	0.848	0.642	0	0	GO:0072659	protein localization to plasma membrane	73/2012	281/18866	2.77393e-13	2.36435e-11	1.75498e-11	SCN3B/ATP2B4/NSF/ACTB/ANK2/PRNP/S100A10/ATP1B1/AP2M1/FCER1G/SPTBN1/CD81/VAMP2/RACK1/STXBP1/NFASC/RAB3B/BSG/CLTC/PACSIN1/CLIP3/BAG4/TTC7B/RAB3C/TREM2/ANK3/RAB40B/CLASP2/ZDHHC23/PICALM/GOLGA7/PRKCZ/STX7/PALM/TMEM59/TMBIM1/MAP7/MYO5A/DLG1/SYTL2/FLNA/TMED2/SQSTM1/PREPL/EFR3A/RAB8B/KCNIP3/STX4/EFR3B/RHOG/C16orf70/PID1/RDX/AKAP5/EHD3/LRP1/DPP6/RILPL1/RAB15/EXOC5/PACS2/CDK5/ZDHHC22/PRKCE/RAB26/TSPAN14/F…	73	hsa05030	Cocaine addiction	13/1041	49/8112	0.00731948	0.0334605	0.0239947	MAOB/CDK5R1/PDYN/GRIN2B/ATF4/PRKACB/GRIA2/GNAI1/GRM3/GRIN1/JUN/ADCY5/CDK5	13	R-HSA-446203	Asparagine N-linked glycosylation	71/1351	304/10704	1.21471e-07	2.35654e-06	1.5088e-06	TUBA1A/TUBA1B/CALR/TUBB4A/CANX/NSF/NAPB/TUBB2A/UBA52/UBB/ANK2/GRIA1/ARF1/DYNLL1/SPTBN1/CNIH2/DCTN1/ARF3/TUBB3/CAPZB/TUSC3/TMED9/MGAT3/CMAS/DYNLL2/RAD23B/UBC/PDIA3/SPTAN1/NAPA/SERPINA1/SEL1L/ANK3/DYNC1LI2/PPP6R1/DCTN5/MAN2A1/DYNC1H1/CAPZA1/TMED2/PRKCSH/NAGK/COG1/MAN1A1/CTSA/RPN2/MLEC/TUBA4A/RPS27A/DYNC1I1/TRAPPC1/ACTR1A/TRAPPC2L/CNIH1/DERL1/MPI/ST6GAL1/PREB/YKT6/ST3GAL5/RPN1/NUS1/TMED7/GANAB/SAR1B…	71
NKX6-2	0	0.373391	0.364	0.12	0	0	GO:0016079	synaptic vesicle exocytosis	43/2012	121/18866	2.80905e-13	2.36435e-11	1.75498e-11	SNCA/SYP/CALM3/PRKCG/NAPB/SYT1/STX1A/SYN1/ATP2A2/VAMP2/STXBP1/NCS1/BACE1/SV2A/GIT1/NAPA/SYT5/SYT17/APBA1/ERC2/DTNBP1/CPLX3/DOC2A/CHRNB2/SYT4/DNAJC5/PIP5K1C/PREPL/STX4/SYNJ1/ADCY1/PSEN1/PCLO/DVL1/CADPS/SYT7/CDK5/RAB5A/PPFIA2/RAB3GAP1/PPFIA3/APBA2/RAP1A	43	hsa05140	Leishmaniasis	18/1041	77/8112	0.00754775	0.034018	0.0243945	C3/MAPK1/HLA-DRA/HLA-DRA/HLA-DRA/HLA-DRA/HLA-DRA/HLA-DRA/HLA-DRA/EEF1A1/ITGB2/MARCKSL1/ELK1/CYBA/MAPK3/EEF1A2/FCGR3A/HLA-DPB1/HLA-DPB1/HLA-DPB1/HLA-DPB1/HLA-DPB1/HLA-DPB1/HLA-DPB1/HLA-DPB1/HLA-DRB1/HLA-DRB1/HLA-DRB1/HLA-DRB1/HLA-DRB1/HLA-DRB1/HLA-DPA1/HLA-DPA1/HLA-DPA1/HLA-DPA1/HLA-DPA1/HLA-DPA1/HLA-DPA1/HLA-DPA1/IFNGR1/JUN/STAT1/MAPK14	18	R-HSA-111885	Opioid Signalling	31/1351	92/10704	1.26873e-07	2.42667e-06	1.5537e-06	MAPK1/CALM3/CAMK2D/PRKCG/GNAO1/CALM1/CALM2/GNG2/PPP3CB/PPP2CB/GNAZ/PRKAR1A/PDE1A/PDYN/PPP2CA/PRKCD/GNG7/PRKACB/GNG3/GNB1/PDE1C/GNAI1/PPP1CA/PRKAR1B/PPP2R1A/GNAL/ADCY1/ADCY5/CAMK2B/PPP3R1/CDK5	31
QKI	0	0.371908	0.93	0.855	0	0	GO:0032271	regulation of protein polymerization	64/2012	231/18866	3.55997e-13	2.95478e-11	2.19324e-11	HSP90AA1/HSPA1A/SNCA/TMSB4X/STMN1/TUBB4A/TPPP/TMSB10/BIN1/ARF1/CORO1A/MAP2/STMN2/SPTBN1/MTPN/PAK1/DCTN1/MAPRE3/ARPC5/PFN1/MAPT/CDK5R1/CYFIP2/CAPZB/RPS3/RAC1/DBNL/ARL2/CLIP3/SPTAN1/PRKCD/BAG4/ARPC4/EVL/PREX1/BAIAP2/PAK3/HSPA1B/GRB2/ARPC3/GMFB/DMTN/CAPZA1/ACTR3B/DLG1/ABI2/FKBP4/ACTR3/PSRC1/DYRK1A/ARPC1B/NCKAP1/HCLS1/CDC42EP1/RDX/BRK1/RHOA/CLASP1/CAPG/PRKCE/HAX1/ACTR2/ARPC1A/TPPP3	64	hsa04371	Apelin signaling pathway	28/1041	137/8112	0.00775158	0.0344515	0.0247053	SPP1/MAPK1/CALM3/MAP2K1/CALM1/CALM2/APLNR/GNG2/RPS6/SLC8A2/MAPK3/HRAS/HRAS/GNG7/PRKACB/GNG3/GNB1/APLN/GNAI1/GABARAPL1/GABARAP/GNAQ/ADCY1/ADCY5/HDAC5/PRKAG2/MEF2D/PRKCE/HDAC4	28	R-HSA-399719	Trafficking of AMPA receptors	16/1351	31/10704	1.77637e-07	3.30454e-06	2.11577e-06	CAMK2D/PRKCG/NSF/GRIA1/AP2M1/CACNG3/GRIA2/AP2S1/AP2B1/DLG1/GRIA3/TSPAN7/CAMK2B/AKAP5/AP2A2/MDM2	16
FABP3	0	0.365176	0.589	0.284	0	0	GO:0051258	protein polymerization	76/2012	300/18866	3.64553e-13	2.975e-11	2.20825e-11	HSP90AA1/HSPA1A/SNCA/TMSB4X/STMN1/TUBB4A/TPPP/TMSB10/BIN1/AIF1/ARF1/CORO1A/MAP2/STMN2/SPTBN1/MTPN/PAK1/DNM1/DCTN1/MAPRE3/COBL/ARPC5/NEFL/PFN1/MAPT/CDK5R1/CYFIP2/CAPZB/RPS3/RAC1/DBNL/ARL2/GAS7/CLIP3/OPA1/SPTAN1/FAM107A/PRKCD/BAG4/ARPC4/EVL/PREX1/BAIAP2/CLASP2/PAK3/HSPA1B/MID1IP1/GRB2/ARPC3/GMFB/DMTN/CAPZA1/ACTR3B/DLG1/ABI2/FKBP4/ACTR3/PSRC1/DYRK1A/ARPC1B/NCKAP1/HCLS1/CDC42EP1/UBE2K/RDX/BRK1/RHOA/C…	76	hsa05142	Chagas disease	22/1041	102/8112	0.00914758	0.040099	0.0287552	C1QB/C1QA/C3/C1QC/MAPK1/CALR/GNAO1/PPP2CB/PPP2R2C/MAPK3/PPP2CA/IFNGR1/GNAI1/PPP2R1A/GNAL/PIK3R2/GNAQ/ADCY1/JUN/MAPK14/MAP2K4/PPP2R2B	22	R-HSA-399721	Glutamate binding, activation of AMPA receptors and synaptic plasticity	16/1351	31/10704	1.77637e-07	3.30454e-06	2.11577e-06	CAMK2D/PRKCG/NSF/GRIA1/AP2M1/CACNG3/GRIA2/AP2S1/AP2B1/DLG1/GRIA3/TSPAN7/CAMK2B/AKAP5/AP2A2/MDM2	16
STMN4	0	0.363662	0.9	0.743	0	0	GO:0002478	antigen processing and presentation of exogenous peptide antigen	54/2012	177/18866	3.6839e-13	2.975e-11	2.20825e-11	CD74/CALR/HLA-DRA/SH3GL2/CTSD/CANX/B2M/ARF1/DYNLL1/AP2M1/FCER1G/HLA-B/DCTN1/HLA-A/KIF3C/CAPZB/MFSD6/RAB7A/CYBA/CLTC/CLTA/DYNLL2/KLC1/PDIA3/DYNC1LI2/HLA-DPB1/DCTN5/HLA-DRB1/AP2S1/AP2B1/HLA-DPA1/DYNC1H1/PSMB4/CAPZA1/CTSS/LNPEP/KIFAP3/DYNC1I1/LGMN/ACTR1A/PSMA4/PSME1/AP2A2/PSMD10/PSMD4/SAR1B/PSMD3/PSMB7/AP1S1/PSMB10/PSMF1/PSMD13/DNM2/TAPBP	54	hsa00190	Oxidative phosphorylation	27/1041	133/8112	0.00965663	0.0417584	0.0299452	ATP6V0C/NDUFS5/ATP6AP1/ATP6V1H/LHPP/ATP6V1B2/ATP5ME/NDUFA3/NDUFA3/NDUFA3/NDUFA3/NDUFA3/NDUFA3/NDUFA3/NDUFA3/NDUFA3/NDUFA3/ATP6V1G2/ATP6V1G2/ATP6V1G2/ATP6V1G2/ATP6V1G2/ATP6V1G2/ATP6V1G2/ATP6V1A/ATP6V0E2/ATP6V0A1/ATP6V0B/ATP6V1C1/ATP6V1E1/ATP6V0D1/UQCR11/ATP6V1F/NDUFC2/NDUFA11/NDUFB8/ATP6V1D/ATP5MC2/ATP5MF/PPA1/COX7A2L/NDUFS7	27	R-HSA-9637687	Suppression of phagosomal maturation	10/1351	13/10704	1.9827e-07	3.62341e-06	2.31992e-06	UBA52/UBB/CORO1A/ATP6V1H/RAB7A/UBC/HGS/RPS27A/RAB5A/KPNB1	10
TUBA1B	0	0.361638	1	1	0	0	GO:0019882	antigen processing and presentation	64/2012	232/18866	4.41342e-13	3.51662e-11	2.61027e-11	CD74/CALR/HLA-DRA/SH3GL2/CTSD/CANX/PSAP/B2M/ARF1/DYNLL1/AP2M1/FCER1G/HLA-B/DCTN1/HLA-A/KIF3C/CAPZB/MFSD6/RAB7A/RAB3B/CYBA/CLTC/CLTA/DYNLL2/KLC1/BCAP31/PDIA3/RAB3C/TREM2/DYNC1LI2/HLA-DPB1/DCTN5/HLA-DRB1/AP2S1/AP2B1/HLA-DPA1/CD68/DYNC1H1/PSMB4/CAPZA1/CTSS/RAB5B/RAB6A/LNPEP/RAB8B/KIFAP3/DYNC1I1/LGMN/ACTR1A/PSMA4/PSME1/AP2A2/PSMD10/RAB4A/PSMD4/SAR1B/PSMD3/PSMB7/AP1S1/PSMB10/PSMF1/PSMD13/DNM2/TAPBP	64	hsa05014	Amyotrophic lateral sclerosis	62/1041	364/8112	0.0107568	0.0458955	0.0329119	TUBA1A/TUBA1B/TUBB4A/TUBB/TUBB/TUBB/TUBB/TUBB/TUBB/TUBB/TUBB/TUBB2A/ACTB/SOD1/GRIA1/NDUFS5/PPP3CB/HNRNPA2B1/DCTN1/HSPA5/NDUFA3/NDUFA3/NDUFA3/NDUFA3/NDUFA3/NDUFA3/NDUFA3/NDUFA3/NDUFA3/NDUFA3/HNRNPA1/NEFL/PFN1/TUBB3/RAC1/KLC1/VDAC1/KIF5C/KIF5C/GRIN2B/ATF4/HNRNPA3/DNAL4/UQCR11/GRIA2/DCTN5/NDUFC2/ANXA11/PSMB4/GABARAPL1/GABARAP/SQSTM1/SQSTM1/NDUFA11/NDUFB8/NXF1/GRIN1/TUBA4A/ATP5MC2/ACTR1A/DERL1/NEFM/P…	62	R-HSA-3371556	Cellular response to heat stress	30/1351	89/10704	2.00114e-07	3.62341e-06	2.31992e-06	CRYAB/HSP90AA1/HSPA1A/MAPK1/HSP90AB1/HSPH1/CAMK2D/PTGES3/YWHAE/EEF1A1/HSPA5/HSPA4/MAPK3/DNAJB1/HSPA8/BAG4/HSPA2/HSBP1/HSPA1B/HSPA9/HSPA4L/ST13/FKBP4/HSPA12A/DNAJC7/HSF1/DNAJB6/CAMK2B/HSPB8/SEH1L	30
CTSB	0	0.360801	0.979	0.936	0	0	GO:0048675	axon extension	43/2012	123/18866	5.37778e-13	4.22863e-11	3.13878e-11	HSP90AA1/HSP90AB1/APOE/DPYSL2/RTN4/SLIT1/MAG/GDI1/SHTN1/MAP2/SEMA3D/PPP3CB/PAK1/RTN4R/SEMA4D/SLIT3/MAPT/CDK5R1/NRCAM/DBNL/PAFAH1B1/RUFY3/RAB21/TNR/SEMA4F/SEMA4A/SEMA3E/VEGFA/SLC9A6/NLGN3/SEMA6B/USP9X/DCLK1/IFRD1/ALCAM/DVL1/LRP1/CDKL5/CDK5/BMPR2/NDN/L1CAM/DNM2	43	hsa03015	mRNA surveillance pathway	21/1041	98/8112	0.0115446	0.048609	0.0348578	PPP2CB/PPP2R2C/PAPOLA/PPP2CA/PPP1CA/PPP1CC/PPP2R1A/CASC3/HBS1L/NXF1/PPP1CB/PABPC1/PABPC4/TARDBP/RNPS1/NUDT21/SMG1/WDR82/PPP2R5C/PABPN1/PPP2R2B	21	R-HSA-5684996	MAPK1/MAPK3 signaling	67/1351	286/10704	2.44658e-07	4.37166e-06	2.799e-06	PEA15/MAPK1/CALM3/CAMK2D/NCAM1/MAP2K1/YWHAB/UBA52/CALM1/ACTB/UBB/CALM2/SPTBN1/PPP2CB/SPRED1/NEFL/MAPK3/ARL2/PTK2/PHB/HRAS/FGF1/UBC/ERBB3/PPP2CA/GRIN2B/SPTAN1/ARRB2/PTPRA/ZDHHC9/RASGRP1/GOLGA7/GRB2/DLG2/RASAL1/PEBP1/PSMB4/DLG1/PPP1CC/PPP2R1A/PIK3R2/GRIN1/PPP1CB/RPS27A/RBX1/CAMK2B/NF1/CNKSR2/SYNGAP1/FGFR2/PSMA4/PSME1/DUSP7/RANBP9/LAMTOR2/PSMD10/BCL2L1/PSMD4/TLN1/CUL3/PSMD3/PSMB7/PPP2R5C/PSMB10/PSMF…	67
SCD5	0	0.358709	0.972	0.904	0	0	GO:0017157	regulation of exocytosis	62/2012	222/18866	5.642e-13	4.37878e-11	3.25022e-11	BAIAP3/SNCA/SYP/CALM3/PRKCG/NSF/NAPB/SYT1/STX1A/SEPTIN4/ARF1/SYN1/FCER1G/ATP2A2/ATP6AP1/ITGB2/VAMP2/STXBP1/RAB7A/RAB3B/ABR/NCS1/BACE1/RAB27B/GIT1/NAPA/RAB21/SYT5/RAB3C/LAMP1/SYT17/APBA1/CLASP2/DTNBP1/CPLX3/DOC2A/CDK5R2/CHRNB2/SYT4/CACNA1I/PREPL/RAB8B/STX4/HGS/ADCY1/RAPGEF4/PCLO/DVL1/CLASP1/CADPS/STXBP3/SEPTIN2/SCAMP5/SYT7/RAB15/CDK5/RAB5A/RAB26/PPFIA2/RAB3GAP1/APBA2/RAP1A	62	hsa05016	Huntington disease	53/1041	306/8112	0.0128261	0.0533034	0.0382241	TUBA1A/SOD2/TUBA1B/TUBB4A/TUBB/TUBB/TUBB/TUBB/TUBB/TUBB/TUBB/TUBB/TUBB2A/SOD1/STX1A/GRIA1/AP2M1/NDUFS5/POLR2L/DCTN1/NDUFA3/NDUFA3/NDUFA3/NDUFA3/NDUFA3/NDUFA3/NDUFA3/NDUFA3/NDUFA3/NDUFA3/TUBB3/CLTC/CLTA/KLC1/VDAC1/KIF5C/KIF5C/GRIN2B/DNAL4/UQCR11/GRIA2/DCTN5/AP2S1/AP2B1/NDUFC2/POLR2F/PSMB4/NDUFA11/GNAQ/NDUFB8/GRIA3/GRIN1/TUBA4A/GRM5/ATP5MC2/TBPL1/CLTB/ACTR1A/PSMA4/AP2A2/AP2A2/AP2A2/POLR2J/COX7A2L/H…	53	R-HSA-199977	ER to Golgi Anterograde Transport	43/1351	154/10704	2.49072e-07	4.39272e-06	2.81248e-06	TUBA1A/TUBA1B/TUBB4A/NSF/NAPB/TUBB2A/ANK2/GRIA1/ARF1/DYNLL1/SPTBN1/CNIH2/DCTN1/ARF3/TUBB3/CAPZB/TMED9/DYNLL2/SPTAN1/NAPA/SERPINA1/ANK3/DYNC1LI2/PPP6R1/DCTN5/DYNC1H1/CAPZA1/TMED2/COG1/TUBA4A/DYNC1I1/TRAPPC1/ACTR1A/TRAPPC2L/CNIH1/PREB/YKT6/TMED7/SAR1B/RAB1A/NAPG/COPA/TUBB2B	43
CALR	0	0.358693	0.85	0.75	0	0	GO:0045665	negative regulation of neuron differentiation	62/2012	225/18866	1.07919e-12	8.26824e-11	6.13724e-11	SPP1/YWHAH/THY1/CNTN2/CALR/APP/APOE/RTN4/MAG/B2M/LPAR1/GDI1/ID4/LINGO1/MAP2/STMN2/SPOCK1/SEMA3D/ARHGDIA/RTN4R/DPYSL3/SEMA4D/EDNRB/OLIG2/CDK5R1/ITM2C/PAFAH1B1/PTK2/RUFY3/SOX8/TNR/SEMA4F/SEMA4A/THRB/SEMA3E/DENND5A/RTN4RL2/PTEN/RAP1GAP2/EFNB3/FEZF2/DIXDC1/PLK2/NLGN3/SPART/BCL11A/FKBP4/SEMA6B/IFRD1/PSEN1/CERS2/RHOA/SYNGAP1/TRAK2/LRP1/CDK5/MDM2/HDAC2/NR2F1/EIF4E/OMG/VIM	62	hsa04710	Circadian rhythm	9/1041	31/8112	0.0132144	0.0542128	0.0388763	SKP1/BTRC/BHLHE41/NR1D1/RBX1/PRKAG2/FBXL3/FBXW11/CSNK1E	9	R-HSA-76005	Response to elevated platelet cytosolic Ca2+	39/1351	134/10704	2.76418e-07	4.8125e-06	3.08125e-06	SERPINA3/TF/TMSB4X/CALM3/PRKCG/APP/CALM1/SOD1/CALM2/PSAP/CFL1/PPIA/CD63/CD9/LAMP2/HSPA5/PFN1/CLU/ANXA5/RAB27B/SELENOP/TIMP1/SERPINA1/APLP2/VEGFA/CHID1/WDR1/LGALS3BP/FLNA/STX4/TUBA4A/MANF/CAP1/QSOX1/STXBP3/PCDH7/TLN1/ENDOD1/A2M	39
CALM3	0	0.35764	1	1	0	0	GO:0043523	regulation of neuron apoptotic process	60/2012	214/18866	1.1086e-12	8.38608e-11	6.22471e-11	NUPR1/SOD2/GABRA5/HIPK2/HSP90AB1/PRKCG/FAIM2/APOE/SOD1/MAG/PRNP/HSPD1/CORO1A/CX3CL1/NSMF/TRIM2/TYROBP/BOK/NEFL/PTPRZ1/STXBP1/CDK5R1/AGAP2/HRAS/BACE1/ERBB3/ATF4/ARRB2/NQO1/CDC34/GRN/SET/CDC42/PAK3/HYOU1/GABRB3/CHL1/TYRO3/CTNNB1/DNAJC5/FBXW7/PIN1/PPT1/GRIN1/JUN/PSEN1/LGMN/RHOA/PARP1/NF1/EGLN2/SYNGAP1/LRP1/RETREG1/CDK5/NRBP2/HDAC4/BCL2L1/SNX6/MAP2K4	60	hsa04390	Hippo signaling pathway	30/1041	157/8112	0.0154617	0.0620229	0.044477	YWHAZ/YWHAH/YWHAB/YWHAG/ACTB/YWHAE/YWHAE/YWHAQ/ITGB2/PPP2CB/PPP2R2C/FGF1/MOB1B/PPP2CA/BTRC/PRKCZ/CRB2/DLG2/PPP1CA/DLG1/CTNNB1/PPP1CC/PPP2R1A/PPP1CB/DVL1/APC2/BMPR2/CCND2/FBXW11/CSNK1E/PPP2R2B	30	R-HSA-6811436	COPI-independent Golgi-to-ER retrograde traffic	21/1351	51/10704	3.0196e-07	5.19066e-06	3.32337e-06	TUBA1A/TUBA1B/TUBB4A/TUBB2A/DYNLL1/RAB6B/DCTN1/TUBB3/CAPZB/PAFAH1B1/DYNLL2/DYNC1LI2/DCTN5/DYNC1H1/CAPZA1/RAB6A/TUBA4A/DYNC1I1/ACTR1A/RAB3GAP1/TUBB2B	21
SLC44A1	0	0.354423	0.559	0.289	0	0	GO:0045666	positive regulation of neuron differentiation	88/2012	380/18866	1.2313e-12	9.19781e-11	6.82723e-11	MMD/CPNE6/TIMP2/MAP2K1/APOE/SYT1/LPAR1/GDI1/ARF1/CNTN1/SNX3/SHTN1/STMN2/APBB1/ATP1B2/CX3CL1/ENC1/PAK1/ARHGDIA/NEUROD2/DPYSL3/SEMA4D/HSPA5/COBL/NEFL/MAPT/FEZ1/NDRG4/NRCAM/NPTN/DBNL/PAFAH1B1/CAMK1/SH3GL3/RUFY3/TMEM30A/PACSIN1/ATP8A2/SERPINI1/OPA1/RAB21/PLXNB1/GRN/SYT17/BAIAP2/VEGFA/PAK3/EIF4G1/PTEN/TENM3/ZEB2/RASAL1/FEZF2/BRINP1/SYT4/GPRC5B/PLXND1/NEURL1/NEDD4L/LRRC7/PSEN1/METRN/ETV5/PLXNC1/ARHGEF2…	88	hsa04960	Aldosterone-regulated sodium reabsorption	10/1041	37/8112	0.0155057	0.0620229	0.044477	MAPK1/PRKCG/ATP1A3/ATP1B1/ATP1B2/SGK1/ATP1A2/MAPK3/PIK3R2/NEDD4L	10	R-HSA-6794362	Protein-protein interactions at synapses	29/1351	86/10704	3.15687e-07	5.35879e-06	3.43102e-06	RTN3/SYT1/STX1A/GRIA1/STXBP1/DBNL/GRIN2B/LRRTM1/NRXN2/APBA1/NLGN2/DLG2/DLGAP4/DLG1/NLGN3/GRIA3/GRIN1/GRM5/LRRTM2/PTPRD/SYT7/SLITRK1/PPFIA2/PPFIA3/FLOT1/PTPRF/APBA2/FLOT2/LRRC4B	29
SNCG	0	0.35373	0.94	0.83	0	0	GO:1903829	positive regulation of cellular protein localization	81/2012	338/18866	1.47556e-12	1.08864e-10	8.0806e-11	ATP2B4/YWHAZ/YWHAH/MAPK1/HSP90AB1/YWHAB/OAZ1/YWHAG/YWHAE/RTN4/PRNP/SREBF2/HPCA/YWHAQ/FCER1G/NECAB2/SPTBN1/ITGB2/PAK1/TYROBP/CD81/VAMP2/MAPT/RACK1/DDRGK1/CDK5R1/NPTN/CAMK1/MGAT3/HRAS/RUFY3/TMEM30A/CHRM1/BCAP31/CLIP3/PRKCD/TREM2/ANK3/CDC42/PDCD5/CCT5/CHP1/RAN/AP2B1/TRIM8/RHOU/GNAI1/ANP32B/DLG1/TCP1/FLNA/PIK3R2/UBL5/SQSTM1/FBXW7/BAP1/STX4/HCLS1/RHOG/PSEN1/NUTF2/CCT2/RDX/B3GAT3/PARP1/AKAP5/LRP1/PPP3R…	81	hsa01200	Carbon metabolism	23/1041	115/8112	0.0190461	0.0752437	0.0539576	TPI1/GAPDH/PKM/ENO1/PRPS1/PGAM2/ACO2/PFKP/TKT/TKFC/HK1/GPI/GPI/ENO2/GLUD1/PDHA1/ME2/PGAM1/ESD/IDH3A/ADH5/PDHB/SUCLG1/MDH2	23	R-HSA-438066	Unblocking of NMDA receptors, glutamate binding and activation	13/1351	22/10704	3.21772e-07	5.39464e-06	3.45398e-06	CALM3/CAMK2D/CALM1/CALM2/GRIA1/NEFL/GRIN2B/GRIA2/DLG2/DLG1/GRIA3/GRIN1/CAMK2B	13
GDA	0	0.353345	0.806	0.568	0	0	GO:0048002	antigen processing and presentation of peptide antigen	56/2012	194/18866	1.71294e-12	1.24836e-10	9.26614e-11	CD74/CALR/HLA-DRA/SH3GL2/CTSD/CANX/B2M/ARF1/DYNLL1/AP2M1/FCER1G/HLA-B/DCTN1/HLA-A/KIF3C/CAPZB/MFSD6/RAB7A/CYBA/CLTC/CLTA/DYNLL2/KLC1/BCAP31/PDIA3/TREM2/DYNC1LI2/HLA-DPB1/DCTN5/HLA-DRB1/AP2S1/AP2B1/HLA-DPA1/DYNC1H1/PSMB4/CAPZA1/CTSS/LNPEP/KIFAP3/DYNC1I1/LGMN/ACTR1A/PSMA4/PSME1/AP2A2/PSMD10/PSMD4/SAR1B/PSMD3/PSMB7/AP1S1/PSMB10/PSMF1/PSMD13/DNM2/TAPBP	56	hsa04012	ErbB signaling pathway	18/1041	85/8112	0.0207373	0.0809261	0.0580325	MAPK1/CAMK2D/PRKCG/MAP2K1/PAK1/ELK1/MAPK3/PTK2/HRAS/HRAS/ERBB3/PAK3/GRB2/PIK3R2/CRKL/JUN/CAMK2B/CRK/MAP2K4	18	R-HSA-8856825	Cargo recognition for clathrin-mediated endocytosis	33/1351	106/10704	4.1416e-07	6.85889e-06	4.39147e-06	TF/SH3GL2/UBA52/SYT1/UBB/AP2M1/SNAP91/VAMP2/CLTC/SH3GL3/CLTA/UBC/ARRB2/AP2S1/PICALM/AP2B1/GRB2/COPS7A/TGOLN2/HGS/RPS27A/M6PR/EPN2/CLTB/SGIP1/NECAP1/EPN1/EPS15/AP2A2/GRK3/SH3KBP1/AGFG1/COPS8	33
CAMK2D	0	0.350788	0.801	0.584	0	0	GO:0007015	actin filament organization	96/2012	434/18866	2.06774e-12	1.48877e-10	1.10507e-10	TF/ERMN/HSP90B1/TMSB4X/STMN1/TMSB10/BIN1/CFL1/AIF1/S100A10/LPAR1/ARF1/CORO1A/SHTN1/SPTBN1/MTPN/CX3CL1/PAK1/TMEFF2/MARCKSL1/SORBS2/DPYSL3/COBL/FSCN1/SYNPO/ARPC5/PFN1/CAP2/CYFIP2/CAPZB/MARCKS/RAC1/DBNL/RUFY3/GAS7/PACSIN1/SPTAN1/FAM107A/PRKCD/BAG4/ARPC4/EVL/BCAR1/PREX1/BAIAP2/CLASP2/CDC42/AIF1L/PAK3/GRB2/ARPC3/WDR1/GMFB/MYO5A/TPM3/RGS4/DMTN/LIMCH1/CAPZA1/DSTN/ACTR3B/FAM171A1/DLG1/FLNA/ABI2/CD47/ACTR…	96	hsa04213	Longevity regulating pathway - multiple species	14/1041	62/8112	0.02312	0.0883485	0.0633552	CRYAB/SOD2/HSPA1A/HSPA1A/HSPA1A/HSPA1A/HSPA1A/SOD1/HRAS/HRAS/HSPA8/PRKACB/HSPA2/HSPA1B/HSPA1B/HSPA1B/HSPA1B/HSPA1B/PIK3R2/ADCY1/ADCY5/PRKAG2/HDAC2	14	R-HSA-77387	Insulin receptor recycling	14/1351	26/10704	5.36878e-07	8.78409e-06	5.62411e-06	ATP6V0C/ATP6AP1/ATP6V1H/ATP6V1B2/ATP6V1G2/ATP6V1A/ATP6V0E2/ATP6V0A1/ATP6V0B/ATP6V1C1/ATP6V1E1/ATP6V0D1/ATP6V1F/ATP6V1D	14
PRKCG	0	0.348614	0.77	0.546	0	0	GO:0051648	vesicle localization	62/2012	229/18866	2.503e-12	1.78071e-10	1.32176e-10	SYN2/NSF/GRIA1/ARF1/SYN1/MAP2/CNIH2/DNM1/SNAP91/KIF1A/KIF1B/RAB7A/TMED9/PAFAH1B1/AP3S1/PCDH17/KIF1C/RAB27B/KIF5C/NAPA/SERPINA1/RASGRP1/CLASP2/PPP6R1/PICALM/PRKCZ/PTEN/DTNBP1/NLGN2/MYO5A/DYNC1H1/SYT4/CTNNB1/NLGN3/TMED2/TMEM230/AP3B2/PEF1/AP3M2/SYNJ1/KIFAP3/DYNC1I1/PSEN1/TRAPPC1/PCLO/TRAPPC2L/CNIH1/CLASP1/PREB/YKT6/TRAK2/CDK5/TANC2/PPFIA2/KLHL12/FBXW11/KIF5B/CUL3/SAR1B/RAB1A/CDH2/DNM2	62	hsa04911	Insulin secretion	18/1041	86/8112	0.0231915	0.0883485	0.0633552	CAMK2D/PRKCG/ATP1A3/STX1A/ATP1B1/ATP1B2/ATP1A2/KCNMB4/VAMP2/ATF4/PRKACB/GNAQ/ADCY1/ADCY5/RAPGEF4/PCLO/CAMK2B/KCNN3	18	R-HSA-177504	Retrograde neurotrophin signalling	10/1351	14/10704	6.15075e-07	9.94371e-06	6.36656e-06	SH3GL2/AP2M1/DNM1/CLTC/CLTA/DNAL4/AP2S1/AP2B1/AP2A2/DNM2	10
NSG2	0	0.348069	0.921	0.797	0	0	GO:0019884	antigen processing and presentation of exogenous antigen	54/2012	185/18866	2.62372e-12	1.84463e-10	1.36921e-10	CD74/CALR/HLA-DRA/SH3GL2/CTSD/CANX/B2M/ARF1/DYNLL1/AP2M1/FCER1G/HLA-B/DCTN1/HLA-A/KIF3C/CAPZB/MFSD6/RAB7A/CYBA/CLTC/CLTA/DYNLL2/KLC1/PDIA3/DYNC1LI2/HLA-DPB1/DCTN5/HLA-DRB1/AP2S1/AP2B1/HLA-DPA1/DYNC1H1/PSMB4/CAPZA1/CTSS/LNPEP/KIFAP3/DYNC1I1/LGMN/ACTR1A/PSMA4/PSME1/AP2A2/PSMD10/PSMD4/SAR1B/PSMD3/PSMB7/AP1S1/PSMB10/PSMF1/PSMD13/DNM2/TAPBP	54	hsa05165	Human papillomavirus infection	55/1041	331/8112	0.0246338	0.092739	0.0665036	SPP1/MAPK1/MAP2K1/ATP6V0C/ATP6AP1/ATP6V1H/PKM/HLA-B/HLA-B/HLA-B/HLA-B/HLA-B/HLA-B/ATP6V1B2/PPP2CB/HLA-A/HLA-A/HLA-A/HLA-A/HLA-A/HLA-A/HLA-A/HLA-A/ATP6V1G2/ATP6V1G2/ATP6V1G2/ATP6V1G2/ATP6V1G2/ATP6V1G2/ATP6V1G2/PPP2R2C/MAPK3/PTK2/ATP6V1A/HRAS/HRAS/ATP6V0E2/ATP6V0A1/ATP6V0B/ATP6V1C1/ITGB4/ATP6V1E1/BCAP31/PPP2CA/ATP6V0D1/TNR/PRKACB/CDC42/ATP6V1F/VEGFA/PRKCZ/PTEN/PTEN/GRB2/DLG2/DLG1/CTNNB1/PPP2R1A/PIK…	55	R-HSA-6811442	Intra-Golgi and retrograde Golgi-to-ER traffic	51/1351	202/10704	6.26566e-07	1.00103e-05	6.4092e-06	TUBA1A/TUBA1B/TUBB4A/NSF/NAPB/TUBB2A/ARF1/DYNLL1/SCOC/RAB6B/DCTN1/ARF3/KIF3C/TUBB3/KIF1A/KIF1B/CAPZB/TMED9/PAFAH1B1/DYNLL2/KLC1/KIF1C/NAPA/KIF21B/DYNC1LI2/DCTN5/MAN2A1/DYNC1H1/SURF4/CAPZA1/TMED2/RAB6A/TGOLN2/COG1/MAN1A1/KIFAP3/TUBA4A/DYNC1I1/M6PR/ACTR1A/YKT6/NBAS/RAB3GAP1/TMED7/KIF5B/RAB1A/STX16/NAPG/CYTH1/COPA/TUBB2B	51
EDIL3	0	0.345588	0.805	0.632	0	0	GO:0033157	regulation of intracellular protein transport	68/2012	264/18866	2.78302e-12	1.93388e-10	1.43545e-10	APOD/YWHAZ/YWHAH/MAPK1/HSP90AB1/YWHAB/OAZ1/YWHAG/YWHAE/PRNP/GDI1/SNX3/SREBF2/HPCA/YWHAQ/XPO1/ITGB2/UHMK1/PAK1/CD81/VAMP2/TXN/CDK5R1/CAMK1/HRAS/RUFY3/TMEM30A/CHRM1/ATP5IF1/BCAP31/PRKCD/BAG4/NUCB1/PKIA/RANGAP1/ANK3/CDC42/PDCD5/CHP1/RAN/RHOU/DMTN/ANP32B/FLNA/PIK3R2/UBL5/FBXW7/BAP1/HCLS1/PSEN1/NUTF2/UFM1/B3GAT3/NF1/AKAP5/PPP3R1/SREBF1/TARDBP/CDK5/HAX1/NMT1/MDM2/MAPK14/KIF5B/SAR1B/SVIP/BNIP3L/IPO5	68	hsa05033	Nicotine addiction	10/1041	40/8112	0.0264709	0.0974196	0.0698601	SLC17A7/GABRA5/GRIA1/GRIN2B/GRIA2/GABRB3/CHRNB2/GRIA3/GRIN1/GABRA2	10	R-HSA-9607240	FLT3 Signaling	67/1351	294/10704	7.16785e-07	1.13185e-05	7.24681e-06	PEA15/MAPK1/CALM3/CAMK2D/NCAM1/MAP2K1/YWHAB/UBA52/CALM1/ACTB/UBB/CALM2/SPTBN1/PPP2CB/SPRED1/NEFL/MAPK3/ARL2/PTK2/PHB/HRAS/FGF1/UBC/ERBB3/PPP2CA/GRIN2B/SPTAN1/ARRB2/PTPRA/ZDHHC9/RASGRP1/GOLGA7/GRB2/DLG2/RASAL1/PEBP1/PSMB4/DLG1/PPP1CC/PPP2R1A/PIK3R2/GRIN1/PPP1CB/RPS27A/RBX1/CAMK2B/NF1/CNKSR2/SYNGAP1/FGFR2/PSMA4/PSME1/DUSP7/RANBP9/LAMTOR2/PSMD10/BCL2L1/PSMD4/TLN1/CUL3/PSMD3/PSMB7/PPP2R5C/PSMB10/PSMF…	67
LDHA	0	0.343764	0.926	0.825	0	0	GO:0007272	ensheathment of neurons	45/2012	139/18866	3.41647e-12	2.32009e-10	1.72213e-10	PLP1/MBP/CLDN11/CNTN2/NKX6-2/QKI/TPPP/SOD1/PSAP/ANK2/MAG/ABCA2/LPAR1/MYRF/ID4/BCAS1/CD9/UGT8/SOX10/SIRT2/CLU/OLIG2/PTPRZ1/PLLP/KLK6/JAM3/NFASC/MAL2/FA2H/ZNF488/MAL/NDRG1/PTEN/MYO5A/DLG1/CTNNB1/GNPAT/TENM4/NCSTN/NF1/RNF10/CNTNAP1/POU3F2/SLC25A46/ATRN	45	hsa04924	Renin secretion	15/1041	69/8112	0.026486	0.0974196	0.0698601	CTSB/CTSB/CALM3/CALM1/CALM2/AQP1/PPP3CB/PDE1A/PRKACB/PDE1C/GNAI1/GUCY1B1/ADORA1/GNAQ/ADCY5/PPP3R1	15	R-HSA-8866652	Synthesis of active ubiquitin: roles of E1 and E2 enzymes	15/1351	30/10704	7.38958e-07	1.15345e-05	7.38511e-06	UBA52/UBB/UBC/CDC34/UBA1/USP5/USP9X/UBE2R2/RPS27A/UBE2Z/UBE2K/UBE2W/UBE2B/USP7/UBE2D2	15
PPDPF	0	0.343536	0.914	0.849	0	0	GO:0008366	axon ensheathment	45/2012	139/18866	3.41647e-12	2.32009e-10	1.72213e-10	PLP1/MBP/CLDN11/CNTN2/NKX6-2/QKI/TPPP/SOD1/PSAP/ANK2/MAG/ABCA2/LPAR1/MYRF/ID4/BCAS1/CD9/UGT8/SOX10/SIRT2/CLU/OLIG2/PTPRZ1/PLLP/KLK6/JAM3/NFASC/MAL2/FA2H/ZNF488/MAL/NDRG1/PTEN/MYO5A/DLG1/CTNNB1/GNPAT/TENM4/NCSTN/NF1/RNF10/CNTNAP1/POU3F2/SLC25A46/ATRN	45	hsa05203	Viral carcinogenesis	36/1041	204/8112	0.0277513	0.100914	0.0723657	C3/YWHAZ/YWHAH/MAPK1/YWHAB/YWHAG/YWHAE/YWHAE/YWHAQ/HNRNPK/PKM/HLA-B/HLA-B/HLA-B/HLA-B/HLA-B/HLA-B/HLA-A/HLA-A/HLA-A/HLA-A/HLA-A/HLA-A/HLA-A/HLA-A/RAC1/MAPK3/HRAS/HRAS/ATP6V0D1/ATF4/PRKACB/KAT2A/CDC42/GRB2/HDAC11/DLG1/PIK3R2/RBPJ/JUN/TBPL1/HDAC5/RHOA/VAC14/CCND2/USP7/HDAC4/MDM2/HDAC2/CHD4	36	R-HSA-3928662	EPHB-mediated forward signaling	18/1351	42/10704	1.04645e-06	1.61005e-05	1.03085e-05	ACTB/CFL1/PAK1/ARPC5/RAC1/PTK2/HRAS/GRIN2B/ARPC4/CDC42/ARPC3/EFNB3/ACTR3/ARPC1B/GRIN1/RHOA/ACTR2/ARPC1A	18
PTMA	0	0.340543	0.995	0.978	0	0	GO:0036465	synaptic vesicle recycling	31/2012	74/18866	3.94391e-12	2.64818e-10	1.96566e-10	SLC17A7/SNCA/SYP/CALM3/SNCG/SH3GL2/DNAJC6/CANX/SYT1/ACTB/STX1A/PPP3CB/DNM1/SNAP91/VAMP2/PACSIN1/RAB27B/SYT5/SYNJ2/PICALM/NLGN2/NLGN3/AMPH/PIP5K1C/BTBD9/SYNJ1/KIAA1109/SYT7/CDK5/RAB5A/DNM2	31	hsa04725	Cholinergic synapse	22/1041	113/8112	0.0285726	0.102733	0.0736702	MAPK1/CAMK2D/PRKCG/MAP2K1/GNAO1/GNG2/KCNQ2/KCNQ2/MAPK3/HRAS/HRAS/CHRM1/ATF4/GNG7/PRKACB/GNG3/GNB1/GNAI1/CHRNB2/PIK3R2/GNAQ/ADCY1/ADCY5/CAMK2B	22	R-HSA-9612973	Autophagy	41/1351	151/10704	1.05518e-06	1.61005e-05	1.03085e-05	GFAP/TUBA1A/HSP90AA1/HSP90AB1/TUBA1B/TUBB4A/TUBB2A/UBA52/UBB/DYNLL1/EEF1A1/RNASE1/LAMP2/MAP1LC3A/TUBB3/DYNLL2/UBC/VDAC1/HSPA8/DYNC1LI2/DYNC1H1/GABARAPL1/GABARAP/ATG9A/SQSTM1/TOMM70/UBE2N/TUBA4A/RPS27A/DYNC1I1/HSF1/PRKAG2/TOMM22/MVB12B/TOMM20/ATG4B/LAMTOR2/LAMTOR4/CSNK2A1/VIM/TUBB2B	41
MAST3	0	0.337054	0.974	0.905	0	0	GO:0042552	myelination	44/2012	137/18866	8.04007e-12	5.33861e-10	3.96267e-10	PLP1/MBP/CNTN2/NKX6-2/QKI/TPPP/SOD1/PSAP/ANK2/MAG/ABCA2/LPAR1/MYRF/ID4/BCAS1/CD9/UGT8/SOX10/SIRT2/CLU/OLIG2/PTPRZ1/PLLP/KLK6/JAM3/NFASC/MAL2/FA2H/ZNF488/MAL/NDRG1/PTEN/MYO5A/DLG1/CTNNB1/GNPAT/TENM4/NCSTN/NF1/RNF10/CNTNAP1/POU3F2/SLC25A46/ATRN	44	hsa04929	GnRH secretion	14/1041	64/8112	0.029876	0.106226	0.076175	SPP1/MAPK1/PRKCG/MAP2K1/MAPK3/HRAS/HRAS/GABBR1/GABBR1/GABBR1/GABBR1/GABBR1/GABBR1/GABBR1/ARRB2/KCNJ9/PIK3R2/CACNA1I/GNAQ/GABBR2/KCNN3	14	R-HSA-199992	trans-Golgi Network Vesicle Budding	25/1351	72/10704	1.09793e-06	1.65665e-05	1.06069e-05	FTL/APP/SH3GL2/DNAJC6/FTH1/ARF1/VAMP2/CLTC/AP3S1/CLTA/HSPA8/NAPA/PICALM/DTNBP1/SORT1/TGOLN2/STX4/HGS/M6PR/CLTB/NECAP1/CPD/PUM1/AP1S1/DNM2	25
MTURN	0	0.336069	0.986	0.96	0	0	GO:0070507	regulation of microtubule cytoskeleton organization	54/2012	190/18866	8.3203e-12	5.40458e-10	4.01164e-10	HSPA1A/SNCA/STMN4/STMN1/TUBB4A/TPPP/STMN3/MAPRE2/MAP2/STMN2/XPO1/PAK1/DCTN1/MAPRE3/MAPT/CDK5R1/RPS3/RAC1/PAFAH1B1/ARL2/CLTC/CLIP3/FAM107A/CHORDC1/KAT2A/CLASP2/PHLDB1/TAOK1/HSPA1B/MID1IP1/CHMP1B/CCP110/GNAI1/DYNC1H1/DIXDC1/MAP6D1/CHMP1A/PLK2/BMERB1/CTNNB1/FKBP4/PSRC1/DYRK1A/TRIM36/ARHGEF2/RHOA/CLASP1/HNRNPU/APC2/RBM14/CDK2AP2/CYLD/MAP6/NSFL1C	54	hsa04270	Vascular smooth muscle contraction	25/1041	133/8112	0.0306106	0.107642	0.0771904	PPP1R14A/MAPK1/CALM3/PRKCG/MAP2K1/CALM1/CALM2/KCNMB4/MYL6/MAPK3/PRKCD/PRKACB/PPP1CA/GUCY1B1/PPP1CC/GNAQ/ADCY1/PPP1CB/ADCY5/PLA2G4C/GNA12/RHOA/PRKCE/MYL9/MYH9	25	R-HSA-5627123	RHO GTPases activate PAKs	13/1351	24/10704	1.26322e-06	1.86754e-05	1.19571e-05	CALM3/CALM1/CALM2/PAK1/MYL6/RAC1/CDC42/PAK3/FLNA/PPP1CB/MYL12B/MYL9/MYH9	13
ANLN	0	0.332512	0.322	0.089	0	0	GO:0099111	microtubule-based transport	54/2012	190/18866	8.3203e-12	5.40458e-10	4.01164e-10	HSPB1/APP/UCHL1/UBB/SOD1/DYNLL1/MAP2/AQP4/SUN2/CNIH2/NEFL/KIF3C/KIF1A/MAPT/KIF1B/FEZ1/ARL8A/PAFAH1B1/AP3S1/DYNLL2/KIF1C/RAB27B/MAPK8IP3/HSPA8/KIF5C/OPA1/RAB21/LAMP1/RASGRP1/APBA1/CDC42/PRKCZ/DTNBP1/SSNA1/DLG2/DYNC1H1/ARHGAP21/DST/DYNLRB1/ARL8B/RAB6A/SFPQ/AP3B2/AP3M2/KIFAP3/DYNC1I1/TUB/TRAK2/HNRNPU/FBXW11/RHOT1/KIF5B/RAB1A/FLOT2	54	hsa04670	Leukocyte transendothelial migration	22/1041	114/8112	0.0312777	0.108792	0.0780153	CLDN11/THY1/PRKCG/ACTB/ITGB2/JAM3/RAC1/CYBA/PTK2/BCAR1/BCAR1/CDC42/GNAI1/CTNNB1/PIK3R2/RAPGEF4/CD99/RHOA/ARHGAP35/MAPK14/MYL12B/MYL9/RAP1A	22	R-HSA-917977	Transferrin endocytosis and recycling	15/1351	31/10704	1.2652e-06	1.86754e-05	1.19571e-05	TF/ATP6V0C/ATP6AP1/ATP6V1H/ATP6V1B2/ATP6V1G2/ATP6V1A/ATP6V0E2/ATP6V0A1/ATP6V0B/ATP6V1C1/ATP6V1E1/ATP6V0D1/ATP6V1F/ATP6V1D	15
MT-ND4L	0	0.332223	1	0.99	0	0	GO:0034329	cell junction assembly	94/2012	434/18866	1.23666e-11	7.94656e-10	5.89847e-10	CLDN11/APOD/MAP4K4/SNCA/THY1/CLSTN2/APP/ACTB/GPM6A/ANK2/SLIT1/S100A10/PKP4/CLSTN1/GPM6B/GJA1/CD9/UGT8/SEMA4D/FSCN1/GAP43/CTNND2/ADGRL3/JAM3/NRCAM/NFASC/NPTN/RAC1/DBNL/ARL2/PTK2/PCDH17/ITGB4/FARP1/FAM107A/SEMA4A/BSN/PLXNB1/LRRTM1/NRXN2/CLASP2/CDC42/CDH8/VEGFA/EIF4G1/PTEN/NECTIN1/NLGN2/SPOCK2/WDR1/GABRB3/CHRNB2/DMTN/LIMCH1/CAPZA1/DLG1/CTNNB1/DST/NLGN3/FLNA/PIP5K1C/ADGRB2/GNPAT/PLXND1/CRKL/CLSTN3/GR…	94	hsa04150	mTOR signaling pathway	28/1041	155/8112	0.0369425	0.127114	0.091154	MAPK1/PRKCG/MAP2K1/RPS6/DDIT4/ATP6V1H/SGK1/ATP6V1B2/ATP6V1G2/ATP6V1G2/ATP6V1G2/ATP6V1G2/ATP6V1G2/ATP6V1G2/ATP6V1G2/MAPK3/ATP6V1A/HRAS/HRAS/ATP6V1C1/ATP6V1E1/ATP6V1F/PTEN/PTEN/GRB2/PIK3R2/ATP6V1D/SLC7A5/DVL1/RHOA/RPS6KA2/LAMTOR2/EIF4B/SEH1L/LAMTOR4/EIF4E	28	R-HSA-948021	Transport to the Golgi and subsequent modification	47/1351	185/10704	1.41878e-06	2.07173e-05	1.32645e-05	TUBA1A/TUBA1B/TUBB4A/NSF/NAPB/TUBB2A/ANK2/GRIA1/ARF1/DYNLL1/SPTBN1/CNIH2/DCTN1/ARF3/TUBB3/CAPZB/TMED9/MGAT3/DYNLL2/SPTAN1/NAPA/SERPINA1/ANK3/DYNC1LI2/PPP6R1/DCTN5/MAN2A1/DYNC1H1/CAPZA1/TMED2/COG1/MAN1A1/TUBA4A/DYNC1I1/TRAPPC1/ACTR1A/TRAPPC2L/CNIH1/ST6GAL1/PREB/YKT6/TMED7/SAR1B/RAB1A/NAPG/COPA/TUBB2B	47
MTCH1	0	0.330967	0.995	0.979	0	0	GO:0043254	regulation of protein-containing complex assembly	96/2012	449/18866	1.6172e-11	1.02812e-09	7.63142e-10	CRYAB/GFAP/HSP90AA1/HSPA1A/SNCA/TMSB4X/STMN1/TUBB4A/TPPP/NAPB/APOE/TMSB10/BIN1/STX1A/ARF1/RPL13A/THRA/CORO1A/MAP2/STMN2/SPTBN1/MTPN/PAK1/DCTN1/HSPA5/MAPRE3/SIRT2/FSCN1/ARPC5/PFN1/CLU/MAPT/RACK1/STXBP1/CDK5R1/CYFIP2/CAPZB/JAM3/RPS3/SEPTIN8/RAC1/DBNL/ARL2/HSPA8/CLIP3/SPTAN1/NAPA/PRKCD/BAG4/ARPC4/EVL/PREX1/BAIAP2/CDC42/VEGFA/PAK3/EIF4G1/PRKCZ/HSPA1B/GRB2/ARPC3/GMFB/DMTN/CAPZA1/ACTR3B/DLG1/GBA/ABI2/F…	96	hsa00562	Inositol phosphate metabolism	15/1041	73/8112	0.0418514	0.141697	0.101612	PIP4K2A/TPI1/PIP4K2B/PIP4K2B/PI4KA/SYNJ2/PTEN/PTEN/PIP5K1C/ITPKB/SYNJ1/PLCD3/ITPK1/ITPK1/INPP4A/MTMR6/SACM1L/CDIPT	15	R-HSA-8875360	InlB-mediated entry of Listeria monocytogenes into host cell	10/1351	15/10704	1.63573e-06	2.36311e-05	1.513e-05	SH3GL2/UBA52/UBB/SH3GL3/UBC/GRB2/HGS/RPS27A/EPS15/SH3KBP1	10
STUM	0	0.329822	0.43	0.138	0	0	GO:0030100	regulation of endocytosis	57/2012	210/18866	1.7028e-11	1.07115e-09	7.9508e-10	TF/C3/SLC17A7/APOC1/SNCA/CALM3/SH3GL2/DNAJC6/APOE/BIN1/ABCA2/B2M/ARF1/HPCA/NECAB2/HNRNPK/CD63/PPP3CB/DNM1/SNAP91/CLU/LRPAP1/APOC2/RAC1/CD22/SH3GL3/CALY/PACSIN1/CDH13/CLIP3/RAB21/ARRB2/TREM2/LRRTM1/CDC42/VEGFA/AP2S1/PICALM/AP2B1/APLN/SYT4/RAB5B/BTBD9/PPT1/NEDD4L/CD151/SGIP1/LRP1/LRRTM2/SCAMP5/SYT7/RAB5A/FLOT1/USP46/RAB4B/RAB4A/DNM2	57	hsa04140	Autophagy - animal	25/1041	137/8112	0.0420663	0.141697	0.101612	MAPK1/CTSB/CTSB/MAP2K1/CTSD/DDIT4/LAMP2/PPP2CB/TP53INP2/RAB7A/MAPK3/HRAS/HRAS/PPP2CA/PRKCD/PRKACB/LAMP1/PTEN/PTEN/GABARAPL1/BNIP3/PIK3R2/GABARAP/ATG9A/SQSTM1/SQSTM1/ATG4B/BCL2L1/RAB1A	25	R-HSA-983712	Ion channel transport	47/1351	186/10704	1.67115e-06	2.38886e-05	1.52949e-05	ATP2B4/FXYD6/CALM3/CAMK2D/ATP6V0C/UBA52/CALM1/UBB/CALM2/ATP1A3/ATP1B1/TTYH2/ATP2A2/ATP1B2/ATP6AP1/ATP6V1H/SGK1/ATP1A2/ATP6V1B2/ATP8A1/ATP9A/ATP2C1/ATP6V1G2/ATP6V1A/CLCN3/ATP6V0E2/ATP6V0A1/WNK1/ATP6V0B/ATP6V1C1/UBC/ATP8A2/ATP6V1E1/ATP6V0D1/TTYH3/CLCN4/ATP6V1F/ANO3/ATP6V1D/CLCN6/NEDD4L/RPS27A/CAMK2B/ATP2B3/ATP2B1/CLCN7/FKBP1B	47
TMEM130	0	0.326579	0.97	0.885	0	0	GO:0032956	regulation of actin cytoskeleton organization	82/2012	360/18866	1.78738e-11	1.11264e-09	8.25879e-10	TMSB4X/STMN1/TMSB10/BIN1/CFL1/S100A10/LPAR1/ARF1/GPM6B/CORO1A/SPTBN1/MTPN/CX3CL1/PAK1/TMEFF2/ARHGDIA/FSCN1/SYNPO/ARPC5/PFN1/CDK5R1/CYFIP2/CAPZB/JAM3/RAC1/DBNL/HRAS/CSF1R/SPTAN1/FAM107A/PRKCD/BST2/BAG4/ARPC4/EVL/ARHGDIB/PREX1/BAIAP2/SEMA3E/CLASP2/CDC42/TAOK1/PAK3/GRB2/ARPC3/WDR1/GMFB/DIXDC1/RGS4/DMTN/LIMCH1/CAPZA1/DSTN/ACTR3B/DLG1/FLNA/ABI2/CD47/ACTR3/ARPC1B/NCKAP1/HCLS1/CFL2/RHOG/CDC42EP1/ARAP1/P…	82	hsa00010	Glycolysis / Gluconeogenesis	14/1041	67/8112	0.04256	0.141867	0.101733	LDHA/LDHA/TPI1/GAPDH/PKM/ENO1/PGAM2/PFKP/HK1/GPI/GPI/ENO2/PDHA1/PGAM1/ADH5/PDHB	14	R-HSA-114608	Platelet degranulation	36/1351	129/10704	2.36246e-06	3.34189e-05	2.13968e-05	SERPINA3/TF/TMSB4X/CALM3/APP/CALM1/SOD1/CALM2/PSAP/CFL1/PPIA/CD63/CD9/LAMP2/HSPA5/PFN1/CLU/ANXA5/RAB27B/SELENOP/TIMP1/SERPINA1/APLP2/VEGFA/CHID1/WDR1/LGALS3BP/FLNA/TUBA4A/MANF/CAP1/QSOX1/PCDH7/TLN1/ENDOD1/A2M	36
NCAM1	0	0.32533	0.965	0.899	0	0	GO:0010498	proteasomal protein catabolic process	101/2012	483/18866	1.87805e-11	1.15703e-09	8.58829e-10	NUPR1/HSPA1A/HSP90B1/HSP90AB1/PRKCG/DNAJB2/UCHL1/RHBDD2/APOE/UBA52/UBB/XPO1/ENC1/FBXL16/TRIM2/PPP2CB/HSPA5/SIRT2/RPL11/CLU/RACK1/DDRGK1/AGAP3/RAD23B/UBC/PCBP2/BCAP31/SKP1/KCTD17/ARRB2/CDC34/TREM2/SEL1L/BTRC/AUP1/HSPA1B/RMND5A/USP14/PLK2/PSMB4/CTNNB1/ZER1/TBL1XR1/GBA/USP5/FBXW7/NR1D1/ECPAS/SDF2L1/NEDD4L/RPS27A/STT3B/PSEN1/CEBPA/UBE2K/RBX1/GNA12/DVL1/DESI1/UBE2W/DERL1/HSPBP1/UBE2B/DDA1/RYBP/ZNRF1/N…	101	hsa05205	Proteoglycans in cancer	35/1041	205/8112	0.045481	0.15004	0.107595	MAPK1/CAMK2D/PRKCG/MAP2K1/ACTB/ANK2/RPS6/CD63/PAK1/CD44/RAC1/ELK1/MAPK3/PTK2/HRAS/HRAS/ERBB3/PRKACB/ANK3/CDC42/VEGFA/GRB2/PPP1CA/CTNNB1/PPP1CC/DDX5/FLNA/PIK3R2/HCLS1/PPP1CB/RDX/RHOA/CAMK2B/EIF4B/MDM2/MAPK14	35	R-HSA-4420097	VEGFA-VEGFR2 Pathway	30/1351	99/10704	2.58243e-06	3.6154e-05	2.3148e-05	HSPB1/HSP90AA1/CALM3/CALM1/ACTB/CALM2/PAK1/CYFIP2/RAC1/CYBA/PTK2/HRAS/PRKCD/PRKACB/BCAR1/BAIAP2/CDC42/VEGFA/PAK3/PRKCZ/CTNNB1/PIK3R2/ABI2/NCKAP1/BRK1/RHOA/ELMO2/CRK/MAPK14/ELMO1	30
STMN1	0	0.324691	1	0.996	0	0	GO:0051656	establishment of organelle localization	93/2012	432/18866	2.26755e-11	1.38275e-09	1.02637e-09	YWHAZ/UCHL1/NSF/UBB/SLIT1/GRIA1/ARF1/MAP2/FCER1G/SUN2/GJA1/CNIH2/XPO1/ATP6AP1/DNM1/DCTN1/SNAP91/RPS15/MAP4/NEFL/KIF3C/KIF1A/MAPT/KIF1B/FEZ1/STXBP1/RAB7A/TMED9/PAFAH1B1/PTK2/AP3S1/KIF1C/RAB27B/KIF5C/OPA1/NAPA/SERPINA1/LAMP1/RASGRP1/CLASP2/CDC42/PPP6R1/PICALM/RAN/PRKCZ/DTNBP1/CLMN/CHMP1B/MYO5A/DYNC1H1/ARHGAP21/CHMP1A/SYT4/DLG1/CTNNB1/TMED2/RAB6A/TMEM230/AP3B2/ACTR3/PSRC1/PEF1/AP3M2/SYNJ1/KIFAP3/DYN…	93	hsa05166	Human T-cell leukemia virus 1 infection	37/1041	219/8112	0.0465366	0.150598	0.107995	MAPK1/CALR/HLA-DRA/HLA-DRA/HLA-DRA/HLA-DRA/HLA-DRA/HLA-DRA/HLA-DRA/MAP2K1/CANX/CANX/B2M/B2M/XPO1/PPP3CB/HLA-B/HLA-B/HLA-B/HLA-B/HLA-B/HLA-B/ITGB2/HLA-A/HLA-A/HLA-A/HLA-A/HLA-A/HLA-A/HLA-A/HLA-A/ELK1/MAPK3/HRAS/HRAS/VDAC1/ATF4/TSPO/PRKACB/KAT2A/HLA-DPB1/HLA-DPB1/HLA-DPB1/HLA-DPB1/HLA-DPB1/HLA-DPB1/HLA-DPB1/HLA-DPB1/HLA-DRB1/HLA-DRB1/HLA-DRB1/HLA-DRB1/HLA-DRB1/HLA-DRB1/RAN/PTEN/PTEN/HLA-DPA1/HLA-DP…	37	R-HSA-162909	Host Interactions of HIV factors	36/1351	130/10704	2.87739e-06	3.98724e-05	2.55287e-05	UBA52/UBB/B2M/ARF1/PPIA/AP2M1/XPO1/ATP6V1H/HLA-A/RAC1/UBC/SKP1/RANGAP1/BTRC/AP2S1/RAN/ELOB/AP2B1/PSMB4/RPS27A/RBX1/PSMA4/PSME1/BANF1/AP2A2/PSMD10/SEH1L/ELMO1/PSMD4/PSMD3/PSMB7/AP1S1/PSMB10/PSMF1/PSMD13/KPNB1	36
LINC02607	0	0.32324	0.482	0.206	0	0	GO:0010770	positive regulation of cell morphogenesis involved in differentiation	47/2012	157/18866	2.56378e-11	1.54759e-09	1.14872e-09	CALR/MAP2K1/S100A10/GDI1/SHTN1/PAK1/ARHGDIA/SEMA4D/NEFL/MAPT/RAC1/DBNL/PAFAH1B1/RUFY3/OPA1/RAB21/PLXNB1/PREX1/BAIAP2/CDC42/VEGFA/PAK3/DOCK5/ZEB2/DMTN/FLNA/PLXND1/CRKL/METRN/PLXNC1/RHOA/CAMK2B/LRP1/CDKL5/P4HB/PTPRD/CRK/SLITRK1/BMPR2/ACTR2/PLXNA2/IST1/PLXNA1/MAP6/L1CAM/DNM2/TUBB2B	47	hsa04970	Salivary secretion	18/1041	93/8112	0.0469557	0.150598	0.107995	ATP2B4/CALM3/PRKCG/CALM1/CALM2/ATP1A3/ATP1B1/ATP1B2/ATP1A2/VAMP2/PRKACB/GUCY1B1/GNAQ/ADCY1/ADCY5/ATP2B3/ATP2B1/SLC12A2	18	R-HSA-9613829	Chaperone Mediated Autophagy	12/1351	22/10704	2.97661e-06	4.00627e-05	2.56505e-05	GFAP/HSP90AA1/HSP90AB1/UBA52/UBB/EEF1A1/RNASE1/LAMP2/UBC/HSPA8/RPS27A/VIM	12
TUBB4A	0	0.321449	0.99	0.961	0	0	GO:0050771	negative regulation of axonogenesis	29/2012	70/18866	2.70275e-11	1.61516e-09	1.19888e-09	SPP1/THY1/RTN4/MAG/GDI1/LINGO1/MAP2/SEMA3D/ARHGDIA/RTN4R/SEMA4D/CDK5R1/PTK2/RUFY3/TNR/SEMA4F/SEMA4A/SEMA3E/PTEN/EFNB3/SPART/SEMA6B/IFRD1/PSEN1/RHOA/SYNGAP1/TRAK2/CDK5/OMG	29	hsa04062	Chemokine signaling pathway	33/1041	192/8112	0.0470618	0.150598	0.107995	MAPK1/MAP2K1/GNG2/CX3CL1/PAK1/RAC1/MAPK3/PTK2/HRAS/HRAS/PRKCD/ARRB2/GNG7/PRKACB/BCAR1/BCAR1/PREX1/GNG3/CDC42/GNB1/PRKCZ/GRB2/GNAI1/PIK3R2/GNAQ/CRKL/ADCY1/ADCY5/RHOA/CRK/STAT1/GRK3/ELMO1/STAT2/RAP1A	33	R-HSA-3858494	Beta-catenin independent WNT signaling	39/1351	146/10704	2.97949e-06	4.00627e-05	2.56505e-05	CALM3/PRKCG/GNAO1/UBA52/CALM1/UBB/CALM2/GNG2/AP2M1/PPP3CB/PFN1/RAC1/CLTC/CLTA/UBC/ARRB2/GNG7/GNG3/GNB1/AP2S1/AP2B1/PSMB4/CTNNB1/RPS27A/CLTB/DVL1/RHOA/PSMA4/PSME1/PPP3R1/AP2A2/PSMD10/DAAM1/PSMD4/PSMD3/PSMB7/PSMB10/PSMF1/PSMD13	39
HLA-DRA	0	0.318519	0.638	0.353	0	0	GO:1903362	regulation of cellular protein catabolic process	65/2012	260/18866	3.43975e-11	2.02106e-09	1.50017e-09	NUPR1/HSP90AA1/HSPA1A/HIPK2/HSP90AB1/PRKCG/DNAJB2/APOE/UBB/ABCA2/XPO1/RPL5/SIRT2/RPL11/CD81/CLU/RPL23/RACK1/DDRGK1/UQCC2/PTK2/MGAT3/RAD23B/ATP5IF1/BCAP31/TREM2/BTRC/PTEN/HSPA1B/USP14/PLK2/ZER1/GBA/USP5/FBXW7/PSEN1/CEBPA/UBE2K/RBX1/GNA12/RDX/DVL1/DESI1/HSPBP1/DDA1/RYBP/NFE2L1/PSME1/LRP1/FBXL5/USP7/PSMD10/SGTA/MDM2/CDK5RAP3/CSNK2A1/KEAP1/ALAD/HERPUD1/SVIP/CSNK1E/PSMF1/UBXN1/WAC/TMEM259	65	hsa04935	Growth hormone synthesis, secretion and action	22/1041	119/8112	0.0477655	0.151336	0.108524	MAPK1/PRKCG/MAP2K1/MAPK3/PTK2/HRAS/HRAS/SSTR1/ATF4/PRKACB/BCAR1/BCAR1/SSTR2/GRB2/GNAI1/PIK3R2/GNAQ/CRKL/ADCY1/ADCY5/CRK/STAT1/MAPK14/MAP2K4	22	R-HSA-442742	CREB1 phosphorylation through NMDA receptor-mediated activation of RAS signaling	14/1351	29/10704	2.97962e-06	4.00627e-05	2.56505e-05	MAPK1/CALM3/CAMK2D/CALM1/CALM2/NEFL/MAPK3/HRAS/GRIN2B/DLG2/DLG1/GRIN1/CAMK2B/RPS6KA2	14
MAP2K1	0	0.316614	0.902	0.768	0	0	GO:0021782	glial cell development	40/2012	122/18866	3.4496e-11	2.02106e-09	1.50017e-09	PLP1/C1QA/CNTN2/NKX6-2/APP/TPPP/SOD1/MAG/ABCA2/LPAR1/MYRF/ID4/CD9/SOX10/SIRT2/CLU/MAPT/OLIG1/FA2H/ZNF488/GRN/TREM2/NDRG1/PTEN/IFNGR1/HDAC11/S100A8/NR1D1/PSEN1/TENM4/NCSTN/S100A9/NF1/GSTP1/CNTNAP1/LRP1/POU3F2/CDK5/SLC25A46/VIM	40	hsa01040	Biosynthesis of unsaturated fatty acids	7/1041	27/8112	0.0493613	0.154859	0.11105	SCD5/SCD/FADS2/ELOVL1/ACOT7/ELOVL5/TECR	7	R-HSA-1295596	Spry regulation of FGF signaling	10/1351	16/10704	3.86725e-06	5.14875e-05	3.29654e-05	MAPK1/UBA52/UBB/PPP2CB/MAPK3/UBC/PPP2CA/GRB2/PPP2R1A/RPS27A	10
DNAJA1	0	0.316249	0.902	0.799	0	0	GO:0002495	antigen processing and presentation of peptide antigen via MHC class II	36/2012	103/18866	4.1505e-11	2.38494e-09	1.77026e-09	CD74/HLA-DRA/SH3GL2/CTSD/CANX/ARF1/DYNLL1/AP2M1/FCER1G/DCTN1/KIF3C/CAPZB/RAB7A/CLTC/CLTA/DYNLL2/KLC1/TREM2/DYNC1LI2/HLA-DPB1/DCTN5/HLA-DRB1/AP2S1/AP2B1/HLA-DPA1/DYNC1H1/CAPZA1/CTSS/KIFAP3/DYNC1I1/LGMN/ACTR1A/AP2A2/SAR1B/AP1S1/DNM2	36										R-HSA-180024	DARPP-32 events	13/1351	26/10704	4.11919e-06	5.43093e-05	3.47721e-05	CALM3/CALM1/CALM2/PPP3CB/PPP2CB/PRKAR1A/PPP2CA/PRKACB/PPP1CA/PRKAR1B/PPP2R1A/PPP3R1/CDK5	13
APP	0	0.315944	0.999	0.989	0	0	GO:0048709	oligodendrocyte differentiation	36/2012	103/18866	4.1505e-11	2.38494e-09	1.77026e-09	PLP1/CNP/CNTN2/NKX6-2/TPPP/MAG/ABCA2/LPAR1/MYRF/ID4/CD9/DAAM2/BOK/SOX10/OPALIN/CLU/OLIG2/PTPRZ1/OLIG1/FA2H/ZNF488/SOX8/IL34/PTEN/HDAC11/WDR1/CTNNB1/NLGN3/BNIP3/TENM4/NCSTN/NF1/GSTP1/CNTNAP1/CDK5/HDAC2	36										R-HSA-4086400	PCP/CE pathway	28/1351	92/10704	5.0359e-06	6.57573e-05	4.21018e-05	PRKCG/UBA52/UBB/AP2M1/PFN1/RAC1/CLTC/CLTA/UBC/ARRB2/AP2S1/AP2B1/PSMB4/RPS27A/CLTB/DVL1/RHOA/PSMA4/PSME1/AP2A2/PSMD10/DAAM1/PSMD4/PSMD3/PSMB7/PSMB10/PSMF1/PSMD13	28
DNAJB2	0	0.313351	0.906	0.781	0	0	GO:0043161	proteasome-mediated ubiquitin-dependent protein catabolic process	91/2012	424/18866	4.43159e-11	2.52221e-09	1.87215e-09	HSPA1A/HSP90B1/HSP90AB1/DNAJB2/UCHL1/RHBDD2/UBA52/UBB/XPO1/FBXL16/TRIM2/PPP2CB/HSPA5/SIRT2/RPL11/CLU/RACK1/DDRGK1/AGAP3/RAD23B/UBC/PCBP2/BCAP31/SKP1/KCTD17/ARRB2/CDC34/SEL1L/BTRC/AUP1/HSPA1B/RMND5A/USP14/PLK2/PSMB4/CTNNB1/ZER1/TBL1XR1/GBA/USP5/FBXW7/ECPAS/NEDD4L/RPS27A/STT3B/PSEN1/CEBPA/UBE2K/RBX1/GNA12/DVL1/DESI1/UBE2W/DERL1/HSPBP1/UBE2B/DDA1/RYBP/ZNRF1/PSMA4/KCTD13/PSME1/UBE4B/UBE4A/UBR3/FBXL5/…	91										R-HSA-1168372	Downstream signaling events of B Cell Receptor (BCR)	26/1351	83/10704	6.05616e-06	7.83264e-05	5.01493e-05	CALM3/UBA52/CALM1/UBB/CALM2/PPIA/PPP3CB/FKBP1A/HRAS/UBC/SKP1/RASGRP1/BTRC/PSMB4/RPS27A/PSMA4/PSME1/PPP3R1/PSMD10/FBXW11/PSMD4/PSMD3/PSMB7/PSMB10/PSMF1/PSMD13	26
RPS2	0	0.312695	0.985	0.96	0	0	GO:0032970	regulation of actin filament-based process	88/2012	405/18866	4.71109e-11	2.65599e-09	1.97145e-09	TMSB4X/CAMK2D/STMN1/TMSB10/ANK2/BIN1/CFL1/S100A10/LPAR1/ARF1/GPM6B/CORO1A/SPTBN1/ATP2A2/MTPN/CX3CL1/PAK1/ATP1A2/TMEFF2/ARHGDIA/FSCN1/SYNPO/ARPC5/PFN1/CDK5R1/CYFIP2/CAPZB/JAM3/RAC1/DBNL/HRAS/CSF1R/SPTAN1/FAM107A/PRKCD/BST2/BAG4/ARPC4/EVL/ARHGDIB/PREX1/BAIAP2/SEMA3E/CLASP2/CDC42/TAOK1/PAK3/GRB2/ARPC3/WDR1/GMFB/DIXDC1/RGS4/DMTN/LIMCH1/CAPZA1/DSTN/ACTR3B/DLG1/FLNA/ABI2/CD47/ACTR3/ADORA1/ARPC1B/NCKAP1…	88										R-HSA-2454202	Fc epsilon receptor (FCERI) signaling	36/1351	134/10704	6.15407e-06	7.85638e-05	5.03013e-05	MAPK1/CALM3/UBA52/CALM1/UBB/CALM2/FCER1G/PPP3CB/PAK1/RAC1/MAPK3/HRAS/UBC/SKP1/CDC34/RASGRP1/BTRC/GRB2/PSMB4/PIK3R2/UBE2N/JUN/RPS27A/PSMA4/PSME1/PPP3R1/PSMD10/MAP2K4/FBXW11/PSMD4/PSMD3/PSMB7/PSMB10/PSMF1/PSMD13/UBE2D2	36
SH3GL2	0	0.312398	0.936	0.813	0	0	GO:0050821	protein stabilization	52/2012	187/18866	4.92944e-11	2.75312e-09	2.04355e-09	CRYAB/HSP90AA1/HSPA1A/HSP90AB1/CALR/PTGES3/GAPDH/RTN4/ANK2/HSPD1/ATP1B1/ATP1B2/LAMP2/TYROBP/RPL5/RPL11/PFN1/CLU/RPL23/PPIB/STXBP1/PHB/RASSF2/SUGT1/PRKCD/BAG4/GRN/LAMP1/SEL1L/CCT5/CHP1/GOLGA7/PTEN/CRTAP/HSPA1B/TCP1/FLNA/FBXW7/PIN1/USP9X/GNAQ/CCT2/DVL1/UBE2B/USP7/FLOT1/USP33/STX12/NAPG/CCT7/CCT3/FLOT2	52										R-HSA-163685	Integration of energy metabolism	31/1351	108/10704	6.21469e-06	7.85638e-05	5.03013e-05	STX1A/GNG2/CACNA1E/PPP2CB/VAMP2/PRKAR1A/STXBP1/MARCKS/AGPAT1/ADIPOR1/PPP2CA/TKT/SYT5/GNG7/PRKACB/GNG3/ACSL4/GNB1/GNAI1/PRKAR1B/PPP2R1A/ADIPOR2/GNAQ/FASN/ADCY1/ADCY5/RAPGEF4/PRKAG2/AKAP5/ACLY/RAP1A	31
PSD3	0	0.311845	0.942	0.852	0	0	GO:0072384	organelle transport along microtubule	32/2012	85/18866	5.32636e-11	2.92707e-09	2.17267e-09	UCHL1/UBB/MAP2/SUN2/CNIH2/NEFL/KIF3C/KIF1A/MAPT/KIF1B/FEZ1/PAFAH1B1/AP3S1/KIF1C/OPA1/LAMP1/RASGRP1/CDC42/PRKCZ/DTNBP1/DYNC1H1/ARHGAP21/RAB6A/AP3B2/AP3M2/KIFAP3/DYNC1I1/TRAK2/FBXW11/RHOT1/KIF5B/RAB1A	32										R-HSA-450531	Regulation of mRNA stability by proteins that bind AU-rich elements	27/1351	88/10704	6.24807e-06	7.85638e-05	5.03013e-05	HSPB1/HSPA1A/YWHAZ/YWHAB/UBA52/UBB/XPO1/UBC/HSPA8/PRKCD/SET/EIF4G1/HSPA1B/PSMB4/ANP32A/RPS27A/PABPC1/PSMA4/PSME1/PSMD10/MAPK14/PSMD4/PSMD3/PSMB7/PSMB10/PSMF1/PSMD13	27
RPS19	0	0.311371	0.997	0.988	0	0	GO:0019886	antigen processing and presentation of exogenous peptide antigen via MHC class II	35/2012	99/18866	5.33887e-11	2.92707e-09	2.17267e-09	CD74/HLA-DRA/SH3GL2/CTSD/CANX/ARF1/DYNLL1/AP2M1/FCER1G/DCTN1/KIF3C/CAPZB/RAB7A/CLTC/CLTA/DYNLL2/KLC1/DYNC1LI2/HLA-DPB1/DCTN5/HLA-DRB1/AP2S1/AP2B1/HLA-DPA1/DYNC1H1/CAPZA1/CTSS/KIFAP3/DYNC1I1/LGMN/ACTR1A/AP2A2/SAR1B/AP1S1/DNM2	35										R-HSA-8876384	Listeria monocytogenes entry into host cells	11/1351	20/10704	7.02601e-06	8.75351e-05	5.60453e-05	SH3GL2/UBA52/UBB/SH3GL3/UBC/GRB2/CTNNB1/HGS/RPS27A/EPS15/SH3KBP1	11
RTN3	0	0.311303	1	0.996	0	0	GO:0002504	antigen processing and presentation of peptide or polysaccharide antigen via MHC class II	36/2012	104/18866	5.70192e-11	3.0977e-09	2.29932e-09	CD74/HLA-DRA/SH3GL2/CTSD/CANX/ARF1/DYNLL1/AP2M1/FCER1G/DCTN1/KIF3C/CAPZB/RAB7A/CLTC/CLTA/DYNLL2/KLC1/TREM2/DYNC1LI2/HLA-DPB1/DCTN5/HLA-DRB1/AP2S1/AP2B1/HLA-DPA1/DYNC1H1/CAPZA1/CTSS/KIFAP3/DYNC1I1/LGMN/ACTR1A/AP2A2/SAR1B/AP1S1/DNM2	36										R-HSA-196025	Formation of annular gap junctions	8/1351	11/10704	7.32037e-06	9.00202e-05	5.76364e-05	ACTB/AP2M1/GJA1/DNM1/CLTC/CLTA/CLTB/DNM2	8
GNAO1	0	0.311173	0.958	0.879	0	0	GO:0032388	positive regulation of intracellular transport	58/2012	222/18866	6.02656e-11	3.24457e-09	2.40834e-09	YWHAZ/YWHAH/MAPK1/HSP90AB1/YWHAB/OAZ1/YWHAG/YWHAE/PRNP/ARF1/SREBF2/HPCA/YWHAQ/MAP2/ITGB2/PAK1/CD81/VAMP2/FEZ1/CDK5R1/CAMK1/HRAS/RUFY3/TMEM30A/CHRM1/BCAP31/RAB21/PRKCD/ANK3/CDC42/PDCD5/DHX9/CHP1/RAN/RHOU/DYNC1H1/ANP32B/FLNA/PIK3R2/UBL5/FBXW7/BAP1/HCLS1/PSEN1/NUTF2/RDX/B3GAT3/AKAP5/PPP3R1/TARDBP/CDK5/NMT1/RBM26/MDM2/MAPK14/KIF5B/SAR1B/IPO5	58										R-HSA-5663202	Diseases of signal transduction by growth factor receptors and second messengers	79/1351	387/10704	7.35806e-06	9.00202e-05	5.76364e-05	HSP90AA1/MAPK1/QKI/CALM3/CAMK2D/MAP2K1/YWHAB/UBA52/CALM1/ACTB/UBB/CALM2/POLR2L/FKBP1A/PPP2CB/SPRED1/ERBIN/RAC1/MAPK3/PHB/HRAS/FGF1/UBC/ERBB3/PPP2CA/SKP1/BAG4/ARRB2/FXR1/KAT2A/SEL1L/PTEN/GRB2/HDAC11/PEBP1/POLR2F/PSMB4/CTNNB1/PPP1CC/PPP2R1A/TBL1XR1/PIK3R2/FBXW7/NEURL1/RBPJ/PPP1CB/CLCN6/RPS27A/RHOG/PSEN1/HDAC5/NCOR2/RBX1/NCSTN/CAMK2B/NF1/CNKSR2/FGFR2/PSMA4/PSME1/DUSP7/PAPSS1/STAT1/POLR2J/TNKS2/PSMD1…	79
DDN	0	0.3079	0.886	0.772	0	0	GO:0035966	response to topologically incorrect protein	55/2012	205/18866	6.26016e-11	3.34024e-09	2.47935e-09	HSPB1/HSP90AA1/HSPA1A/HSP90B1/HSP90AB1/HSPH1/CALR/DNAJA1/DNAJB2/RHBDD2/CANX/HSPD1/PDIA6/HSPE1/DCTN1/BOK/HSPA5/CLU/RACK1/DDRGK1/HSPA4/DNAJB1/HSPA8/ATP6V0D1/ATF4/HSPA2/AUP1/HSPA1B/HYOU1/HSPA9/HSPA4L/DNAJB4/MYDGF/SDF2L1/STT3B/MANF/HSF1/TMBIM6/TPP1/TMEM33/UBE2W/DERL1/HSPB8/PREB/EXTL3/SRPRA/SSR1/CDK5RAP3/VAPB/TLN1/HERPUD1/CUL3/HDGF/CTDSP2/RNF5	55										R-HSA-6802957	Oncogenic MAPK signaling	26/1351	84/10704	7.73251e-06	9.37567e-05	6.00287e-05	MAPK1/QKI/CALM3/CAMK2D/MAP2K1/YWHAB/CALM1/ACTB/CALM2/SPRED1/MAPK3/PHB/HRAS/ARRB2/FXR1/PEBP1/PPP1CC/PPP1CB/CLCN6/CAMK2B/NF1/CNKSR2/DUSP7/PAPSS1/TLN1/RAP1A	26
TPPP	0	0.307821	0.949	0.871	0	0	GO:1904951	positive regulation of establishment of protein localization	82/2012	370/18866	7.71203e-11	4.0785e-09	3.02734e-09	BAIAP3/YWHAZ/YWHAH/MAPK1/HSP90AB1/YWHAB/GAPDH/OAZ1/YWHAG/MIF/YWHAE/PRNP/ARF1/SREBF2/HPCA/YWHAQ/PPIA/APBB1/GJA1/PPP3CB/ITGB2/PAK1/NNAT/CD81/VAMP2/RACK1/CDK5R1/RAC1/CAMK1/HRAS/RUFY3/TMEM30A/CHRM1/BCAP31/PRKCD/TREM2/ANK3/GPI/ACSL4/CDC42/PDCD5/CCT5/HLA-DRB1/CHP1/RAN/PRKCZ/RBP4/NLGN2/RHOU/PPID/ANP32B/TCP1/CADM1/FLNA/PIK3R2/UBL5/FBXW7/BAP1/STX4/GLUD1/HCLS1/PSEN1/NUTF2/CCT2/C2CD2L/B3GAT3/AKAP5/LRP1/PPP3…	82										R-HSA-432722	Golgi Associated Vesicle Biogenesis	20/1351	56/10704	7.92167e-06	9.40762e-05	6.02333e-05	FTL/SH3GL2/DNAJC6/FTH1/ARF1/VAMP2/CLTC/AP3S1/CLTA/HSPA8/NAPA/PICALM/DTNBP1/SORT1/TGOLN2/NECAP1/CPD/PUM1/AP1S1/DNM2	20
STMN3	0	0.303597	0.986	0.949	0	0	GO:1902414	protein localization to cell junction	36/2012	105/18866	7.79401e-11	4.0857e-09	3.03268e-09	HSPB1/ACTB/CLSTN1/CNIH2/TYROBP/CACNG3/MAPT/JAM3/NPTN/HRAS/RAB27B/MAPK8IP3/KIF5C/BSN/LRRTM1/BAIAP2/NRXN2/PRKCZ/STX7/NECTIN1/NLGN2/DLG2/DLG1/FLNA/IQSEC2/CLSTN3/GRIN1/LRRC7/PCLO/DVL1/LAMTOR2/CDK5/ANKS1B/ADAM10/KIF5B/RAP1A	36										R-HSA-450408	AUF1 (hnRNP D0) binds and destabilizes mRNA	20/1351	56/10704	7.92167e-06	9.40762e-05	6.02333e-05	HSPB1/HSPA1A/UBA52/UBB/UBC/HSPA8/EIF4G1/HSPA1B/PSMB4/RPS27A/PABPC1/PSMA4/PSME1/PSMD10/PSMD4/PSMD3/PSMB7/PSMB10/PSMF1/PSMD13	20
UCHL1	0	0.302852	1	1	0	0	GO:0051588	regulation of neurotransmitter transport	39/2012	120/18866	8.16978e-11	4.24545e-09	3.15126e-09	BAIAP3/SNCA/SYP/CALM3/SNCG/PRKCG/NAPB/SYT1/STX1A/SYN1/GPM6B/ATP2A2/ATP1A2/KCNMB4/STXBP1/RAB3B/NCS1/BACE1/ARL6IP5/GIT1/NAPA/APBA1/DTNBP1/CPLX3/CHRNB2/SYT4/PREPL/ADCY1/DVL1/NF1/SYT7/CDK5/RAB5A/PPFIA2/RAB3GAP1/FLOT1/RHOT1/APBA2/RAP1A	39										R-HSA-5339562	Uptake and actions of bacterial toxins	14/1351	31/10704	7.96669e-06	9.40762e-05	6.02333e-05	HSP90AA1/HSP90AB1/CALM3/MAP2K1/SYT1/CALM1/CALM2/STX1A/CD9/VAMP2/SV2B/SV2A/EEF2/MAP2K4	14
CTSD	0	0.302415	0.981	0.939	0	0	GO:0050890	cognition	71/2012	302/18866	9.00628e-11	4.63979e-09	3.44396e-09	SLC17A7/GABRA5/MAPK1/CNTN2/PRKCG/HLA-DRA/APP/APOE/B2M/PRNP/GRIA1/SLC8A2/THRA/SGK1/PPP3CB/ATP1A2/ATP8A1/NEUROD2/SYNPO/MAPT/NDRG4/PTPRZ1/TUSC3/NPTN/NPTX2/PAFAH1B1/MGAT3/RGS14/CHRM1/VDAC1/PJA2/GRIN2B/HMGCR/FAM107A/TNR/KAT2A/NRXN2/PICALM/PRKCZ/PTEN/GMFB/CHL1/BRINP1/CHRNB2/PLK2/SYT4/PRKAR1B/NLGN3/SLC12A5/JPH4/ADORA1/BTBD9/SYNJ1/PPT1/ADCY1/GRIN1/CALB1/JUN/GRM5/PSEN1/LGMN/NCSTN/SHISA7/NF1/HRH3/SYNGAP1/A…	71										R-HSA-416993	Trafficking of GluR2-containing AMPA receptors	10/1351	17/10704	8.32789e-06	9.68481e-05	6.2008e-05	PRKCG/NSF/GRIA1/AP2M1/GRIA2/AP2S1/AP2B1/GRIA3/TSPAN7/AP2A2	10
PTGES3	0	0.300789	0.931	0.864	0	0	GO:0010038	response to metal ion	81/2012	366/18866	1.08235e-10	5.52833e-09	4.1035e-09	TF/C1QA/QDPR/SNCA/MAPK1/CPNE6/CALR/CALM3/CAMK2D/APP/SYT1/CALM1/SOD1/CALM2/B2M/PRNP/GDI1/SLC30A3/HPCA/CACYBP/APBB1/MAOB/AQP1/KCNMB4/NEUROD2/PPP2CB/HSPA5/MAP1LC3A/MAPT/CLIC4/MAPK3/BSG/BACE1/CAPN3/PGAM2/PPP2CA/ATF4/CPNE7/SYT5/TSPO/GLRA2/NQO1/STIM1/SYT17/NDRG1/CA2/ANK3/JUND/PTEN/S100A8/ANXA11/DLG2/PPP1CA/RASAL1/DMTN/SYT4/BNIP3/CPOX/ITPKB/PEF1/ADCY1/JUN/NEDD4L/SLC25A23/LGMN/CEBPA/HSF1/LONP1/ALOX5AP/NC…	81										R-HSA-532668	N-glycan trimming in the ER and Calnexin/Calreticulin cycle	15/1351	35/10704	8.34405e-06	9.68481e-05	6.2008e-05	CALR/CANX/UBA52/UBB/RAD23B/UBC/PDIA3/SEL1L/PRKCSH/MLEC/RPS27A/DERL1/GANAB/RNF5/UBXN1	15
TMEM59L	0	0.299826	0.995	0.977	0	0	GO:0032409	regulation of transporter activity	69/2012	291/18866	1.10825e-10	5.61265e-09	4.16609e-09	SCN3B/SNCA/YWHAH/TMSB4X/FXYD6/CALM3/CAMK2D/APP/CALM1/ACTB/YWHAE/CALM2/ANK2/PRNP/GRIA1/NDFIP1/HPCA/ATP1B1/GJA1/CNIH2/ATP1B2/KCNG1/SGK1/FKBP1A/ATP1A2/CACNG3/VAMP2/NEFL/CACNA2D1/WNK1/SHISA9/GRIN2B/PRKCD/STIM1/HSPA2/TREM2/ANK3/GRIA2/CHP1/PTEN/NLGN2/SYNGR3/MYO5A/DLG2/SCN2B/DLG1/CTSS/NLGN3/CACNB1/JPH4/GRIA3/GRIN1/STK39/NEDD4L/LRRC7/GRM5/DYSF/SHISA7/EHD3/CDK5/PRKCE/KCNIP2/ANTKMT/AKAP6/KIF5B/FKBP1B/DNM2/…	69										R-HSA-9620244	Long-term potentiation	12/1351	24/10704	9.75628e-06	0.00011228	7.18884e-05	CALM3/CAMK2D/CALM1/CALM2/GRIA1/NEFL/GRIN2B/GRIA2/DLG2/DLG1/GRIN1/CAMK2B	12
FAIM2	0	0.298036	0.998	0.982	0	0	GO:1902905	positive regulation of supramolecular fiber organization	55/2012	208/18866	1.14429e-10	5.74645e-09	4.2654e-09	HSPA1A/APP/APOE/BIN1/CFL1/S100A10/LPAR1/ARF1/CORO1A/STMN2/CX3CL1/PAK1/DCTN1/SYNPO/ARPC5/PFN1/CLU/MAPT/CDK5R1/RPS3/RAC1/ARL2/BAG4/ARPC4/EVL/BAIAP2/CDC42/HSPA1B/GRB2/ARPC3/WDR1/GMFB/LIMCH1/DSTN/ACTR3B/DLG1/FLNA/ABI2/CD47/ACTR3/PSRC1/ARPC1B/NCKAP1/CFL2/PSEN1/CDC42EP1/PDXP/BRK1/RHOA/CLASP1/PRKCE/ACTR2/TPM1/RHOC/ARPC1A	55										R-HSA-5626467	RHO GTPases activate IQGAPs	14/1351	32/10704	1.2526e-05	0.000142944	9.15214e-05	TUBA1A/TUBA1B/CALM3/TUBB4A/TUBB2A/CALM1/ACTB/CALM2/TUBB3/RAC1/CDC42/CTNNB1/TUBA4A/TUBB2B	14
DNAJC6	0	0.297232	0.924	0.799	0	0	GO:0016236	macroautophagy	72/2012	310/18866	1.19959e-10	5.97396e-09	4.43428e-09	NUPR1/PIP4K2A/UCHL1/ATP6V0C/GAPDH/DYNLL1/SCOC/ATP6V1H/LAMP2/ATP6V1B2/MAP1LC3A/FEZ1/DDRGK1/ATP6V1G2/CDK5R1/TP53INP2/RAB7A/PIP4K2B/MAPK3/ATP6V1A/ATP6V0E2/CAPNS1/ATP6V0A1/ATP6V0B/DYNLL2/ATP6V1C1/ATP6V1E1/VDAC1/ATP6V0D1/VPS41/AUP1/LARP1/GABARAPL1/BNIP3/GBA/GABARAP/ATG9A/SQSTM1/TOMM70/ATP6V1D/HGS/PSEN1/UFM1/SPTLC2/TBC1D14/PRKAG2/EI24/HSPB8/TOMM22/QSOX1/TOMM20/ATG4B/EXOC7/LAMTOR2/RETREG1/PACS2/CDK5/NRB…	72										R-HSA-5673000	RAF activation	15/1351	36/10704	1.26451e-05	0.000143101	9.16217e-05	CALM3/CAMK2D/MAP2K1/YWHAB/CALM1/CALM2/PPP2CB/PHB/HRAS/PPP2CA/PPP1CC/PPP2R1A/PPP1CB/CAMK2B/PPP2R5C	15
SH3BGRL3	0	0.296431	0.896	0.771	0	0	GO:0060996	dendritic spine development	35/2012	102/18866	1.38712e-10	6.85076e-09	5.08509e-09	APOE/CFL1/LPAR1/ARF1/KIF1A/CTNND2/CDK5R1/SRCIN1/DBNL/PAFAH1B1/CAMK1/OPA1/BAIAP2/ACSL4/CDC42/PAK3/PTEN/SLC9A6/PLK2/IQSEC1/NLGN3/ABI2/SLC12A5/NEURL1/PSEN1/DVL1/CAMK2B/SRGAP2/CDKL5/CDK5/TANC2/ACTR2/PPFIA2/ADAM10/HDAC2	35										R-HSA-442982	Ras activation upon Ca2+ influx through NMDA receptor	11/1351	21/10704	1.30733e-05	0.00014552	9.3171e-05	CALM3/CAMK2D/CALM1/CALM2/NEFL/HRAS/GRIN2B/DLG2/DLG1/GRIN1/CAMK2B	11
TUBB	0	0.295529	0.973	0.924	0	0	GO:0097479	synaptic vesicle localization	25/2012	57/18866	1.42804e-10	6.99506e-09	5.19221e-09	SYN2/ARF1/SYN1/MAP2/CNIH2/DNM1/SNAP91/AP3S1/PCDH17/KIF5C/PICALM/PTEN/DTNBP1/NLGN2/CTNNB1/NLGN3/TMEM230/AP3B2/AP3M2/SYNJ1/PCLO/CDK5/KIF5B/CDH2/DNM2	25										R-HSA-6807004	Negative regulation of MET activity	11/1351	21/10704	1.30733e-05	0.00014552	9.3171e-05	SH3GL2/UBA52/UBB/SH3GL3/UBC/GRB2/HGS/RPS27A/PTPRJ/EPS15/SH3KBP1	11
FCGBP	0	0.295383	0.286	0.055	0	0	GO:0090316	positive regulation of intracellular protein transport	50/2012	182/18866	1.84931e-10	8.98494e-09	6.66922e-09	YWHAZ/YWHAH/MAPK1/HSP90AB1/YWHAB/OAZ1/YWHAG/YWHAE/PRNP/SREBF2/HPCA/YWHAQ/ITGB2/PAK1/CD81/VAMP2/CDK5R1/CAMK1/HRAS/RUFY3/TMEM30A/CHRM1/BCAP31/PRKCD/ANK3/CDC42/PDCD5/CHP1/RAN/RHOU/ANP32B/FLNA/PIK3R2/UBL5/FBXW7/BAP1/HCLS1/PSEN1/NUTF2/B3GAT3/AKAP5/PPP3R1/TARDBP/CDK5/NMT1/MDM2/MAPK14/KIF5B/SAR1B/IPO5	50										R-HSA-389960	Formation of tubulin folding intermediates by CCT/TriC	12/1351	25/10704	1.66131e-05	0.00018342	0.000117436	TUBA1A/TUBA1B/TUBB4A/TUBB2A/TUBB3/CCT5/TCP1/TUBA4A/CCT2/CCT7/CCT3/TUBB2B	12
MAPRE2	0	0.295018	0.891	0.765	0	0	GO:1905475	regulation of protein localization to membrane	52/2012	195/18866	2.62681e-10	1.26595e-08	9.39676e-09	ATP2B4/YWHAZ/YWHAH/YWHAB/YWHAG/ACTB/YWHAE/PRNP/GDI1/HPCA/YWHAQ/AP2M1/NECAB2/SPTBN1/ITGB2/PAK1/CD81/RACK1/CDK5R1/CLTC/HRAS/CLIP3/TREM2/ANK3/PDCD5/PICALM/CHP1/PRKCZ/STX7/AP2B1/TMEM59/TMBIM1/DMTN/DLG1/IQSEC2/SQSTM1/CRKL/STX4/RHOG/PID1/SHISA7/AKAP5/LRP1/PPP3R1/CDK5/PRKCE/NMT1/BCL2L1/ADAM10/KIF5B/CDH2/RAP1A	52										R-HSA-69275	G2/M Transition	46/1351	196/10704	1.76285e-05	0.00019149	0.000122603	TUBA1A/HSP90AA1/HSP90AB1/TUBA1B/TUBB4A/TUBB/TUBB2A/UBA52/YWHAG/YWHAE/UBB/DYNLL1/XPO1/DCTN1/PPP2CB/TUBB3/PAFAH1B1/UBC/PPP2CA/SKP1/MZT2A/BTRC/CCP110/SSNA1/DYNC1H1/PSMB4/PPP2R1A/PPP1CB/TUBA4A/RPS27A/ACTR1A/RBX1/MZT2B/CLASP1/PSMA4/PSME1/PSMD10/FBXW11/PSMD4/PSMD3/PSMB7/CSNK1E/PSMB10/PSMF1/PSMD13/TUBB2B	46
ARPP19	0	0.293911	0.996	0.989	0	0	GO:0035418	protein localization to synapse	31/2012	85/18866	2.70842e-10	1.28648e-08	9.54916e-09	HSPB1/CLSTN1/CNIH2/TYROBP/CACNG3/MAPT/NPTN/HRAS/RAB27B/MAPK8IP3/KIF5C/BSN/LRRTM1/BAIAP2/NRXN2/PRKCZ/STX7/NLGN2/DLG2/DLG1/IQSEC2/CLSTN3/GRIN1/LRRC7/PCLO/DVL1/CDK5/ANKS1B/ADAM10/KIF5B/RAP1A	31										R-HSA-194138	Signaling by VEGF	30/1351	108/10704	1.77442e-05	0.00019149	0.000122603	HSPB1/HSP90AA1/CALM3/CALM1/ACTB/CALM2/PAK1/CYFIP2/RAC1/CYBA/PTK2/HRAS/PRKCD/PRKACB/BCAR1/BAIAP2/CDC42/VEGFA/PAK3/PRKCZ/CTNNB1/PIK3R2/ABI2/NCKAP1/BRK1/RHOA/ELMO2/CRK/MAPK14/ELMO1	30
SEPTIN3	0	0.289108	0.979	0.929	0	0	GO:0051495	positive regulation of cytoskeleton organization	58/2012	230/18866	2.71247e-10	1.28648e-08	9.54916e-09	HSPA1A/BIN1/CFL1/S100A10/LPAR1/ARF1/CORO1A/STMN2/CX3CL1/PAK1/DCTN1/SYNPO/ARPC5/PFN1/MAPT/CDK5R1/RPS3/RAC1/ARL2/HRAS/BAG4/ARPC4/EVL/BAIAP2/CDC42/HSPA1B/GRB2/ARPC3/WDR1/GMFB/DYNC1H1/LIMCH1/DSTN/ACTR3B/DLG1/FLNA/ABI2/CD47/ACTR3/PSRC1/ARPC1B/NCKAP1/HCLS1/CFL2/CDC42EP1/PDXP/BRK1/RHOA/CLASP1/CDK5/PRKCE/HAX1/ACTR2/PFDN2/TPM1/RHOC/NSFL1C/ARPC1A	58										R-HSA-5663220	RHO GTPases Activate Formins	36/1351	140/10704	1.77671e-05	0.00019149	0.000122603	TUBA1A/TUBA1B/TUBB4A/TUBB2A/ACTB/DYNLL1/XPO1/PPP2CB/PFN1/TUBB3/RAC1/PAFAH1B1/DYNLL2/PPP2CA/FMNL2/EVL/RANGAP1/DYNC1LI2/CLASP2/CDC42/TAOK1/DYNC1H1/NUDC/PPP1CC/PPP2R1A/TUBA4A/DYNC1I1/DVL1/RHOA/CLASP1/SRGAP2/SEH1L/DAAM1/PPP2R5C/RHOC/TUBB2B	36
RPL13	0	0.289098	1	0.999	0	0	GO:0007611	learning or memory	63/2012	260/18866	2.76929e-10	1.30309e-08	9.67244e-09	SLC17A7/GABRA5/MAPK1/CNTN2/PRKCG/APP/APOE/B2M/PRNP/GRIA1/SLC8A2/THRA/SGK1/PPP3CB/ATP1A2/ATP8A1/NEUROD2/SYNPO/MAPT/NDRG4/PTPRZ1/NPTN/NPTX2/PAFAH1B1/RGS14/VDAC1/PJA2/GRIN2B/HMGCR/TNR/KAT2A/NRXN2/PICALM/PRKCZ/PTEN/GMFB/BRINP1/CHRNB2/PLK2/SYT4/PRKAR1B/NLGN3/SLC12A5/JPH4/BTBD9/SYNJ1/PPT1/ADCY1/GRIN1/CALB1/JUN/GRM5/PSEN1/LGMN/NCSTN/SHISA7/NF1/SYNGAP1/ADGRB3/CDK5/COMT/ACTR2/RIC8A	63										R-HSA-5099900	WNT5A-dependent internalization of FZD4	9/1351	15/10704	1.94097e-05	0.000207108	0.000132603	PRKCG/AP2M1/CLTC/CLTA/ARRB2/AP2S1/AP2B1/CLTB/AP2A2	9
PLD3	0	0.288686	0.992	0.964	0	0	GO:0099173	postsynapse organization	48/2012	173/18866	2.94056e-10	1.37287e-08	1.01904e-08	APOE/ACTB/CFL1/PRNP/ARF1/GAP43/NEFL/KIF1A/CTNND2/CDK5R1/NRCAM/SRCIN1/DBNL/PAFAH1B1/HSPA8/OPA1/GRIN2B/LRRTM1/NDRG1/BAIAP2/NRXN2/CDC42/PAK3/PTEN/NLGN2/DLG2/DLG1/NLGN3/ABI2/CRKL/GLRB/LGMN/ETV5/SHISA7/DVL1/CAMK2B/CNKSR2/SYNGAP1/CDKL5/LRRTM2/PTPRD/CDK5/TANC2/ACTR2/PPFIA2/ADAM10/CDH2/LRRC4B	48										R-HSA-190873	Gap junction degradation	8/1351	12/10704	1.95212e-05	0.000207108	0.000132603	ACTB/AP2M1/GJA1/DNM1/CLTC/CLTA/CLTB/DNM2	8
SUB1	0	0.287196	0.942	0.847	0	0	GO:0006470	protein dephosphorylation	73/2012	323/18866	3.33998e-10	1.54726e-08	1.14848e-08	PPP1R14A/HSP90B1/HSP90AB1/CALM3/DNAJC6/ARPP19/YWHAB/CALM1/YWHAE/CALM2/NSMF/PTP4A2/PPP3CB/LHPP/FKBP1A/PPP2CB/PTPRZ1/PPP2R2C/PHACTR3/PTPRR/ENSA/PTPA/PPP2CA/PTPRN/PRKCD/ACP1/PTPRA/ELFN2/SET/SLC39A10/BTRC/PPP6R1/PTEN/CTDNEP1/PPP1CA/DLG1/PPP1CC/PPP2R1A/SPPL3/GBA/ADORA1/PIN1/PPP1CB/SMPD1/PTPRN2/PDXP/PPP1R16B/PPP4R4/B3GAT3/DUSP22/DUSP7/PPP3R1/PTPRD/PTPRJ/PPP1R10/CABIN1/PPP1R11/DUSP26/PPM1L/PTPRF/FBXW11/…	73										R-HSA-1632852	Macroautophagy	35/1351	136/10704	2.26992e-05	0.000238958	0.000152995	TUBA1A/HSP90AA1/TUBA1B/TUBB4A/TUBB2A/UBA52/UBB/DYNLL1/MAP1LC3A/TUBB3/DYNLL2/UBC/VDAC1/HSPA8/DYNC1LI2/DYNC1H1/GABARAPL1/GABARAP/ATG9A/SQSTM1/TOMM70/UBE2N/TUBA4A/RPS27A/DYNC1I1/HSF1/PRKAG2/TOMM22/TOMM20/ATG4B/LAMTOR2/LAMTOR4/CSNK2A1/VIM/TUBB2B	35
RHBDD2	0	0.284831	0.983	0.939	0	0	GO:0008154	actin polymerization or depolymerization	56/2012	221/18866	4.51542e-10	2.07571e-08	1.54073e-08	TMSB4X/TMSB10/BIN1/CFL1/AIF1/ARF1/CORO1A/SPTBN1/MTPN/COBL/ARPC5/PFN1/CAP2/CYFIP2/CAPZB/RAC1/DBNL/GAS7/SPTAN1/FAM107A/PRKCD/BAG4/ARPC4/EVL/PREX1/BAIAP2/PAK3/GRB2/ARPC3/WDR1/GMFB/DMTN/CAPZA1/DSTN/ACTR3B/DLG1/ABI2/ACTR3/ARPC1B/NCKAP1/HCLS1/CFL2/CDC42EP1/PDXP/CAP1/RDX/BRK1/RHOA/CAPG/ENAH/ARHGAP35/PRKCE/HAX1/ACTR2/MICAL3/ARPC1A	56										R-HSA-9617324	Negative regulation of NMDA receptor-mediated neuronal transmission	11/1351	22/10704	2.31699e-05	0.000239734	0.000153492	CALM3/CAMK2D/CALM1/CALM2/NEFL/CAMK1/GRIN2B/DLG2/DLG1/GRIN1/CAMK2B	11
TPT1	0	0.282989	0.999	0.999	0	0	GO:0048013	ephrin receptor signaling pathway	31/2012	87/18866	5.31238e-10	2.42342e-08	1.79882e-08	ACTB/AP2M1/PAK1/DNM1/ARPC5/CDK5R1/RAC1/PTK2/CHN1/HRAS/GRIN2B/GIT1/ARPC4/CDC42/AP2S1/PAK3/AP2B1/ARPC3/EFNB3/ACTR3/ARPC1B/RBPJ/GRIN1/PSEN1/NCSTN/RHOA/CRK/ANKS1B/AP2A2/ACTR2/ARPC1A	31										R-HSA-453274	Mitotic G2-G2/M phases	46/1351	198/10704	2.3222e-05	0.000239734	0.000153492	TUBA1A/HSP90AA1/HSP90AB1/TUBA1B/TUBB4A/TUBB/TUBB2A/UBA52/YWHAG/YWHAE/UBB/DYNLL1/XPO1/DCTN1/PPP2CB/TUBB3/PAFAH1B1/UBC/PPP2CA/SKP1/MZT2A/BTRC/CCP110/SSNA1/DYNC1H1/PSMB4/PPP2R1A/PPP1CB/TUBA4A/RPS27A/ACTR1A/RBX1/MZT2B/CLASP1/PSMA4/PSME1/PSMD10/FBXW11/PSMD4/PSMD3/PSMB7/CSNK1E/PSMB10/PSMF1/PSMD13/TUBB2B	46
CANX	0	0.281334	0.961	0.906	0	0	GO:0071248	cellular response to metal ion	51/2012	193/18866	5.5239e-10	2.50082e-08	1.85628e-08	TF/SNCA/MAPK1/CPNE6/CALR/CAMK2D/APP/SYT1/SOD1/B2M/PRNP/HPCA/CACYBP/AQP1/NEUROD2/HSPA5/MAP1LC3A/CLIC4/MAPK3/BACE1/CAPN3/ATF4/CPNE7/SYT5/TSPO/GLRA2/NQO1/SYT17/ANK3/JUND/DLG2/RASAL1/DMTN/SYT4/BNIP3/ITPKB/ADCY1/JUN/SLC25A23/LGMN/CEBPA/HSF1/ALOX5AP/NCSTN/PARP1/CPNE5/NFE2L1/CPNE3/SYT7/ALAD/SLC12A2	51										R-HSA-6811434	COPI-dependent Golgi-to-ER retrograde traffic	28/1351	99/10704	2.33025e-05	0.000239734	0.000153492	TUBA1A/TUBA1B/TUBB4A/NSF/NAPB/TUBB2A/ARF1/ARF3/KIF3C/TUBB3/KIF1A/KIF1B/TMED9/KLC1/KIF1C/NAPA/KIF21B/SURF4/TMED2/KIFAP3/TUBA4A/NBAS/TMED7/KIF5B/RAB1A/NAPG/COPA/TUBB2B	28
SERF2	0	0.278664	0.989	0.97	0	0	GO:0016311	dephosphorylation	98/2012	492/18866	6.21621e-10	2.79309e-08	2.07322e-08	PPP1R14A/HSP90B1/PLPPR4/HSP90AB1/CALM3/DNAJC6/ARPP19/YWHAB/CALM1/YWHAE/CALM2/NSMF/PTP4A2/PPP3CB/LHPP/FKBP1A/ATP1A2/PPP2CB/SEMA4D/SPRED1/PTPRZ1/PPP2R2C/PHACTR3/ARFGEF3/PLPPR2/PTPRR/ENSA/PTPA/WNK1/PPP2CA/FARP1/PTPRN/PRKCD/BAG4/ACP1/PTPRA/SYNJ2/ELFN2/SET/SLC39A10/PLPP2/BTRC/PPP6R1/CHP1/PTEN/CTDNEP1/DLG2/PPP1CA/PLPPR3/DLG1/PPP1CC/PPP2R1A/SYTL2/SPPL3/GBA/ADORA1/PIN1/SYNJ1/SLC7A14/ENOPH1/PPP1CB/SMPD1/P…	98										R-HSA-112040	G-protein mediated events	19/1351	56/10704	3.06986e-05	0.000308978	0.000197826	MAPK1/CALM3/CAMK2D/PRKCG/GNAO1/CALM1/CALM2/GNAZ/PRKAR1A/PDE1A/PRKCD/PRKACB/PDE1C/GNAI1/PRKAR1B/GNAL/ADCY1/ADCY5/CAMK2B	19
NSF	0	0.276937	0.981	0.932	0	0	GO:0008089	anterograde axonal transport	22/2012	48/18866	6.42813e-10	2.86676e-08	2.1279e-08	HSPB1/SOD1/MAP2/CNIH2/NEFL/KIF1A/KIF1B/FEZ1/ARL8A/AP3S1/KIF1C/RAB27B/MAPK8IP3/KIF5C/RAB21/DTNBP1/DLG2/ARL8B/AP3B2/AP3M2/TRAK2/KIF5B	22										R-HSA-6802946	Signaling by moderate kinase activity BRAF mutants	17/1351	47/10704	3.11708e-05	0.000308978	0.000197826	MAPK1/CALM3/CAMK2D/MAP2K1/YWHAB/CALM1/ACTB/CALM2/MAPK3/PHB/HRAS/ARRB2/PEBP1/CAMK2B/CNKSR2/TLN1/RAP1A	17
TSPAN3	0	0.273754	0.979	0.944	0	0	GO:0110053	regulation of actin filament organization	65/2012	278/18866	7.1116e-10	3.14807e-08	2.33671e-08	TMSB4X/STMN1/TMSB10/BIN1/CFL1/S100A10/LPAR1/ARF1/CORO1A/SPTBN1/MTPN/CX3CL1/PAK1/TMEFF2/SYNPO/ARPC5/PFN1/CYFIP2/CAPZB/RAC1/DBNL/SPTAN1/PRKCD/BAG4/ARPC4/EVL/PREX1/BAIAP2/CLASP2/CDC42/PAK3/GRB2/ARPC3/WDR1/GMFB/RGS4/DMTN/LIMCH1/CAPZA1/DSTN/ACTR3B/DLG1/FLNA/ABI2/CD47/ACTR3/ARPC1B/NCKAP1/HCLS1/CFL2/CDC42EP1/ARAP1/PDXP/RDX/BRK1/RHOA/CLASP1/CAPG/ARHGAP35/PRKCE/HAX1/ACTR2/TPM1/RHOC/ARPC1A	65										R-HSA-6802949	Signaling by RAS mutants	17/1351	47/10704	3.11708e-05	0.000308978	0.000197826	MAPK1/CALM3/CAMK2D/MAP2K1/YWHAB/CALM1/ACTB/CALM2/MAPK3/PHB/HRAS/ARRB2/PEBP1/CAMK2B/CNKSR2/TLN1/RAP1A	17
TPI1	0	0.271979	0.998	0.994	0	0	GO:0050773	regulation of dendrite development	44/2012	155/18866	7.26799e-10	3.17862e-08	2.35938e-08	YWHAH/APOE/CFL1/LPAR1/ARF1/NSMF/SEMA4D/COBL/KIF1A/CDK5R1/SRCIN1/DBNL/PAFAH1B1/CAMK1/PACSIN1/OPA1/RAB21/PREX1/BAIAP2/PAK3/PTEN/CHRNB2/PLK2/NLGN3/BCL11A/ABI2/NEURL1/CRKL/GRIN1/NEDD4L/PSEN1/RHOA/CAMK2B/CDKL5/ADGRB3/PTPRD/CRK/CDK5/TANC2/ACTR2/PPFIA2/RAP2A/ADAM10/HDAC2	44										R-HSA-6802955	Paradoxical activation of RAF signaling by kinase inactive BRAF	17/1351	47/10704	3.11708e-05	0.000308978	0.000197826	MAPK1/CALM3/CAMK2D/MAP2K1/YWHAB/CALM1/ACTB/CALM2/MAPK3/PHB/HRAS/ARRB2/PEBP1/CAMK2B/CNKSR2/TLN1/RAP1A	17
FTH1	0	0.271096	1	1	0	0	GO:0051222	positive regulation of protein transport	77/2012	354/18866	7.28699e-10	3.17862e-08	2.35938e-08	BAIAP3/YWHAZ/YWHAH/MAPK1/HSP90AB1/YWHAB/GAPDH/OAZ1/YWHAG/MIF/YWHAE/PRNP/ARF1/SREBF2/HPCA/YWHAQ/PPIA/APBB1/GJA1/PPP3CB/ITGB2/PAK1/NNAT/CD81/VAMP2/RACK1/CDK5R1/RAC1/CAMK1/HRAS/RUFY3/TMEM30A/CHRM1/BCAP31/PRKCD/TREM2/ANK3/GPI/ACSL4/CDC42/PDCD5/HLA-DRB1/CHP1/RAN/PRKCZ/RBP4/NLGN2/RHOU/PPID/ANP32B/CADM1/FLNA/PIK3R2/UBL5/FBXW7/BAP1/STX4/GLUD1/HCLS1/PSEN1/NUTF2/C2CD2L/B3GAT3/AKAP5/LRP1/PPP3R1/SCAMP5/TARDB…	77										R-HSA-9649948	Signaling downstream of RAS mutants	17/1351	47/10704	3.11708e-05	0.000308978	0.000197826	MAPK1/CALM3/CAMK2D/MAP2K1/YWHAB/CALM1/ACTB/CALM2/MAPK3/PHB/HRAS/ARRB2/PEBP1/CAMK2B/CNKSR2/TLN1/RAP1A	17
ATP6V0C	0	0.270028	1	0.997	0	0	GO:0006986	response to unfolded protein	49/2012	183/18866	7.3499e-10	3.18283e-08	2.36251e-08	HSPB1/HSP90AA1/HSPA1A/HSP90B1/HSP90AB1/HSPH1/CALR/DNAJA1/DNAJB2/RHBDD2/CANX/HSPD1/PDIA6/HSPE1/DCTN1/BOK/HSPA5/RACK1/DDRGK1/HSPA4/DNAJB1/HSPA8/ATP6V0D1/ATF4/HSPA2/HSPA1B/HYOU1/HSPA9/HSPA4L/DNAJB4/MYDGF/STT3B/MANF/HSF1/TMBIM6/TPP1/TMEM33/DERL1/HSPB8/PREB/EXTL3/SRPRA/SSR1/CDK5RAP3/VAPB/TLN1/HERPUD1/HDGF/CTDSP2	49										R-HSA-198725	Nuclear Events (kinase and transcription factor activation)	20/1351	61/10704	3.36979e-05	0.000331607	0.000212315	MAPK1/ID4/SGK1/PPP2CB/CDK5R1/ELK1/MAPK3/SH3GL3/PPP2CA/JUND/CDK5R2/PPP2R1A/RPS6KA2/DUSP7/MEF2D/CDK5/MAPK14/VGF/CHD4/DNM2	20
RPSA	0	0.269873	0.985	0.967	0	0	GO:0051650	establishment of vesicle localization	54/2012	212/18866	7.50122e-10	3.20195e-08	2.3767e-08	NSF/GRIA1/ARF1/MAP2/CNIH2/DNM1/SNAP91/KIF1A/KIF1B/RAB7A/TMED9/PAFAH1B1/AP3S1/KIF1C/RAB27B/KIF5C/NAPA/SERPINA1/RASGRP1/CLASP2/PPP6R1/PICALM/PRKCZ/DTNBP1/MYO5A/DYNC1H1/SYT4/CTNNB1/TMED2/TMEM230/AP3B2/PEF1/AP3M2/SYNJ1/KIFAP3/DYNC1I1/PSEN1/TRAPPC1/TRAPPC2L/CNIH1/CLASP1/PREB/YKT6/TRAK2/CDK5/TANC2/PPFIA2/KLHL12/FBXW11/KIF5B/CUL3/SAR1B/RAB1A/DNM2	54										R-HSA-983705	Signaling by the B Cell Receptor (BCR)	30/1351	112/10704	3.80178e-05	0.000371426	0.000237809	CALM3/UBA52/CALM1/UBB/CALM2/PPIA/PPP3CB/FKBP1A/CD22/HRAS/UBC/SKP1/STIM1/RASGRP1/BTRC/GRB2/PSMB4/RPS27A/PSMA4/PSME1/PPP3R1/PSMD10/SH3KBP1/FBXW11/PSMD4/PSMD3/PSMB7/PSMB10/PSMF1/PSMD13	30
NAPB	0	0.269398	0.989	0.958	0	0	GO:1901215	negative regulation of neuron death	54/2012	212/18866	7.50122e-10	3.20195e-08	2.3767e-08	SOD2/GABRA5/SNCA/HIPK2/HSP90AB1/PRKCG/FAIM2/APOE/SOD1/MAG/HSPD1/CORO1A/CX3CL1/BOK/NEFL/RACK1/PTPRZ1/STXBP1/AGAP2/HRAS/ERBB3/ATF4/NENF/ARRB2/GRN/SET/EIF4G1/AP2B1/HYOU1/GABRB3/CHL1/TYRO3/CTNNB1/DNAJC5/GBA/PIN1/PPT1/GRIN1/JUN/PSEN1/LGMN/HSF1/CD200/NCOA7/RHOA/SYNGAP1/LRP1/RETREG1/CDK5/NRBP2/BCL2L1/SNX6/MAP2K4/TMEM259	54										R-HSA-5684264	MAP3K8 (TPL2)-dependent MAPK1/3 activation	9/1351	16/10704	3.93929e-05	0.000380096	0.000243361	MAP2K1/UBA52/UBB/UBC/SKP1/BTRC/RPS27A/MAP2K4/FBXW11	9
YWHAB	0	0.26658	0.991	0.967	0	0	GO:0048193	Golgi vesicle transport	80/2012	374/18866	7.84901e-10	3.32665e-08	2.46926e-08	NSF/ANK2/GRIA1/ARF1/SNX3/DYNLL1/SPTBN1/CNIH2/RAB6B/DCTN1/ARF3/ATP9A/VAMP2/KIF3C/RACK1/CAPZB/TMED9/PGAP1/DYNLL2/KLC1/KIF1C/BCAP31/SPTAN1/NAPA/SERPINA1/LAMP1/ANK3/DYNC1LI2/PPP6R1/DCTN5/VAPA/GOLGA7/HYOU1/MYO5A/DYNC1H1/SURF4/SORT1/CAPZA1/PITPNB/TMED2/RAB6A/COG1/SCYL1/PREPL/PEF1/RAB8B/STX4/KIFAP3/RABEP1/DYNC1I1/TRAPPC1/ACTR1A/C16orf70/TBC1D14/TRAPPC2L/CNIH1/PREB/TMED5/YKT6/GOLGA3/EHD3/SNX1/EXOC5/NBAS/…	80										R-HSA-111996	Ca-dependent events	15/1351	39/10704	3.94651e-05	0.000380096	0.000243361	MAPK1/CALM3/CAMK2D/PRKCG/CALM1/CALM2/PRKAR1A/PDE1A/PRKCD/PRKACB/PDE1C/PRKAR1B/ADCY1/ADCY5/CAMK2B	15
RTL8C	0	0.265808	0.977	0.928	0	0	GO:1904062	regulation of cation transmembrane transport	76/2012	349/18866	8.88786e-10	3.74041e-08	2.77639e-08	SCN3B/SNCA/ATP2B4/YWHAH/THY1/TMSB4X/FXYD6/CALM3/CAMK2D/APP/CALM1/YWHAE/CALM2/ANK2/BIN1/PRNP/GRIA1/APLNR/ARF1/HPCA/CORO1A/ATP1B1/CNIH2/ATP1B2/CX3CL1/CD63/KCNG1/FKBP1A/ATP1A2/CACNG3/VAMP2/NEFL/CYBA/KCNAB2/CACNA2D1/CAPN3/WNK1/SHISA9/GRIN2B/STIM1/HSPA2/TREM2/ANK3/GRIA2/CHP1/PTEN/NLGN2/MYO5A/DLG2/RGS4/SCN2B/DLG1/CTSS/NLGN3/CACNB1/FLNA/JPH4/KCNIP3/GRIA3/GRIN1/STK39/NEDD4L/LRRC7/DYSF/SHISA7/EHD3/DPP6/CD…	76										R-HSA-193697	p75NTR regulates axonogenesis	7/1351	10/10704	4.2619e-05	0.000407581	0.000260958	RTN4/MAG/LINGO1/ARHGDIA/RTN4R/RHOA/OMG	7
TUBB2A	0	0.265051	0.997	0.992	0	0	GO:1903050	regulation of proteolysis involved in cellular protein catabolic process	56/2012	225/18866	9.30126e-10	3.88702e-08	2.88521e-08	NUPR1/HSPA1A/HIPK2/HSP90AB1/PRKCG/DNAJB2/APOE/UBB/XPO1/RPL5/SIRT2/RPL11/CLU/RPL23/RACK1/DDRGK1/PTK2/RAD23B/ATP5IF1/BCAP31/TREM2/BTRC/PTEN/HSPA1B/USP14/PLK2/ZER1/GBA/USP5/FBXW7/PSEN1/CEBPA/UBE2K/RBX1/GNA12/DVL1/DESI1/HSPBP1/DDA1/RYBP/NFE2L1/PSME1/USP7/PSMD10/SGTA/MDM2/CSNK2A1/KEAP1/ALAD/HERPUD1/SVIP/CSNK1E/PSMF1/UBXN1/WAC/TMEM259	56										R-HSA-9648002	RAS processing	12/1351	27/10704	4.35569e-05	0.000413639	0.000264837	CALM3/UBA52/CALM1/UBB/CALM2/ARL2/HRAS/UBC/ZDHHC9/GOLGA7/RPS27A/BCL2L1	12
GAPDH	0	0.263376	1	1	0	0	GO:0030004	cellular monovalent inorganic cation homeostasis	36/2012	114/18866	1.05509e-09	4.37863e-08	3.25011e-08	MAPK1/ATP6V0C/ATP1A3/ATP1B1/ATP1B2/ATP6AP1/ATP6V1H/ATP1A2/ATP6V1B2/ATP6V1G2/CLIC4/RAB7A/MAPK3/ATP6AP2/ATP6V1A/CLCN3/ATP6V0E2/ATP6V0A1/ATP6V0B/ATP6V1C1/ATP6V1E1/SLC4A3/ATP6V0D1/TMEM165/GRN/CA2/ATP6V1F/CHP1/SLC9A6/ROGDI/ATP6V1D/PPT1/NEDD4L/DMXL2/MAFG/SLC12A2	36										R-HSA-182971	EGFR downregulation	13/1351	31/10704	4.43357e-05	0.00041811	0.0002677	SH3GL2/UBA52/UBB/SH3GL3/UBC/CDC42/GRB2/HGS/RPS27A/EPN1/EPS15/SH3KBP1/PTPRK	13
APOE	0	0.262338	1	0.996	0	0	GO:0048813	dendrite morphogenesis	42/2012	146/18866	1.12688e-09	4.6443e-08	3.44731e-08	YWHAH/CFL1/MAP2/NSMF/SEMA4D/KIF1A/CTNND2/CDK5R1/SRCIN1/DBNL/PAFAH1B1/FARP1/OPA1/RAB21/BAIAP2/CDC42/PICALM/PAK3/PTEN/DTNBP1/CHRNB2/NLGN3/ABI2/DCLK1/GRIN1/NEDD4L/DVL1/CAMK2B/CELSR2/TRAK2/CDKL5/ADGRB3/PTPRD/CDK5/TANC2/ACTR2/PPFIA2/RAP2A/ADAM10/MAP6/MINK1/HPRT1	42										R-HSA-8852276	The role of GTSE1 in G2/M progression after G2 checkpoint	23/1351	77/10704	4.8008e-05	0.00044962	0.000287874	TUBA1A/HSP90AA1/HSP90AB1/TUBA1B/TUBB4A/TUBB2A/UBA52/UBB/TUBB3/UBC/PSMB4/TUBA4A/RPS27A/PSMA4/PSME1/PSMD10/PSMD4/PSMD3/PSMB7/PSMB10/PSMF1/PSMD13/TUBB2B	23
TMSB10	0	0.259531	1	1	0	0	GO:0034976	response to endoplasmic reticulum stress	67/2012	294/18866	1.22841e-09	5.02808e-08	3.73218e-08	NUPR1/HSPA1A/HSP90B1/CALR/DNAJB2/RHBDD2/CANX/ATP2A2/PDIA6/DCTN1/PPP2CB/BOK/HSPA5/CLU/RACK1/DDRGK1/SERINC3/ERP29/BCAP31/PDIA3/OPA1/ATP6V0D1/ATF4/EEF2/SEL1L/AUP1/EIF4G1/HYOU1/USP14/PIK3R2/ECPAS/MYDGF/SDF2L1/JUN/STT3B/MANF/UFM1/UBE2K/TMBIM6/TPP1/TMEM33/PDIA4/DERL1/PREB/NFE2L1/EXTL3/UBE4B/UBE4A/P4HB/SCAMP5/SRPRA/TARDBP/SSR1/FBXO44/SGTA/FLOT1/BCL2L1/CDK5RAP3/VAPB/TLN1/HERPUD1/SVIP/HDGF/CTDSP2/RNF5/UBX…	67										R-HSA-2644602	Signaling by NOTCH1 PEST Domain Mutants in Cancer	19/1351	58/10704	5.34031e-05	0.000483476	0.000309551	UBA52/UBB/UBC/SKP1/KAT2A/HDAC11/TBL1XR1/FBXW7/NEURL1/RBPJ/RPS27A/PSEN1/HDAC5/NCOR2/RBX1/NCSTN/HDAC4/ADAM10/HDAC2	19
OAZ1	0	0.256938	0.998	0.992	0	0	GO:0031110	regulation of microtubule polymerization or depolymerization	30/2012	85/18866	1.31033e-09	5.32689e-08	3.95398e-08	HSPA1A/SNCA/STMN4/STMN1/TUBB4A/STMN3/MAPRE2/MAP2/STMN2/PAK1/DCTN1/MAPRE3/MAPT/CDK5R1/RPS3/RAC1/ARL2/CLIP3/CLASP2/TAOK1/HSPA1B/MID1IP1/MAP6D1/BMERB1/FKBP4/PSRC1/DYRK1A/ARHGEF2/CLASP1/APC2	30										R-HSA-2644603	Signaling by NOTCH1 in Cancer	19/1351	58/10704	5.34031e-05	0.000483476	0.000309551	UBA52/UBB/UBC/SKP1/KAT2A/HDAC11/TBL1XR1/FBXW7/NEURL1/RBPJ/RPS27A/PSEN1/HDAC5/NCOR2/RBX1/NCSTN/HDAC4/ADAM10/HDAC2	19
UBA52	0	0.255811	0.992	0.978	0	0	GO:0022898	regulation of transmembrane transporter activity	64/2012	276/18866	1.37171e-09	5.53874e-08	4.11123e-08	SCN3B/SNCA/YWHAH/TMSB4X/FXYD6/CALM3/CAMK2D/APP/CALM1/ACTB/YWHAE/CALM2/ANK2/PRNP/GRIA1/HPCA/ATP1B1/GJA1/CNIH2/ATP1B2/KCNG1/FKBP1A/ATP1A2/CACNG3/VAMP2/NEFL/CACNA2D1/WNK1/SHISA9/GRIN2B/STIM1/HSPA2/TREM2/ANK3/GRIA2/CHP1/PTEN/NLGN2/MYO5A/DLG2/SCN2B/DLG1/CTSS/NLGN3/CACNB1/JPH4/GRIA3/GRIN1/STK39/NEDD4L/LRRC7/GRM5/DYSF/SHISA7/EHD3/CDK5/PRKCE/KCNIP2/ANTKMT/AKAP6/KIF5B/FKBP1B/DNM2/MINK1	64										R-HSA-2644606	Constitutive Signaling by NOTCH1 PEST Domain Mutants	19/1351	58/10704	5.34031e-05	0.000483476	0.000309551	UBA52/UBB/UBC/SKP1/KAT2A/HDAC11/TBL1XR1/FBXW7/NEURL1/RBPJ/RPS27A/PSEN1/HDAC5/NCOR2/RBX1/NCSTN/HDAC4/ADAM10/HDAC2	19
YWHAG	0	0.255752	0.999	0.996	0	0	GO:0045851	pH reduction	24/2012	58/18866	1.42146e-09	5.67711e-08	4.21394e-08	ATP6V0C/ATP6AP1/ATP6V1H/ATP6V1B2/ATP6V1G2/CLIC4/RAB7A/ATP6AP2/ATP6V1A/CLCN3/ATP6V0E2/ATP6V0A1/ATP6V0B/ATP6V1C1/ATP6V1E1/ATP6V0D1/GRN/CA2/ATP6V1F/ROGDI/ATP6V1D/PPT1/DMXL2/CCKBR	24										R-HSA-2894858	Signaling by NOTCH1 HD+PEST Domain Mutants in Cancer	19/1351	58/10704	5.34031e-05	0.000483476	0.000309551	UBA52/UBB/UBC/SKP1/KAT2A/HDAC11/TBL1XR1/FBXW7/NEURL1/RBPJ/RPS27A/PSEN1/HDAC5/NCOR2/RBX1/NCSTN/HDAC4/ADAM10/HDAC2	19
SYT1	0	0.254482	1	0.997	0	0	GO:0007265	Ras protein signal transduction	75/2012	346/18866	1.42498e-09	5.67711e-08	4.21394e-08	MAP4K4/TIMP2/STMN1/PSD3/STMN3/MAPRE2/APOE/CFL1/AIF1/LPAR1/GDI1/SHTN1/ARHGDIA/RTN4R/PPP2CB/ADGRG1/ERBIN/ARHGDIG/ARFGEF3/G3BP2/RAC1/DBNL/HRAS/DHCR24/RAP2B/CDH13/RAB21/ARHGDIB/RTKN/CDC42SE2/RASGRP1/CDC42/RIPOR2/GNB1/GRB2/RHOU/RASAL1/PLK2/IQSEC1/ABI2/IQSEC2/SQSTM1/ITPKB/CRKL/NCKAP1/PSD2/JUN/RHOG/CDC42EP1/CADM4/ARHGAP1/NISCH/LZTR1/GNA12/ARHGEF2/RDX/BRK1/RHOA/NF1/SYNGAP1/KCTD13/RAB15/CRK/ARHGAP35/FLOT1…	75										R-HSA-2894862	Constitutive Signaling by NOTCH1 HD+PEST Domain Mutants	19/1351	58/10704	5.34031e-05	0.000483476	0.000309551	UBA52/UBB/UBC/SKP1/KAT2A/HDAC11/TBL1XR1/FBXW7/NEURL1/RBPJ/RPS27A/PSEN1/HDAC5/NCOR2/RBX1/NCSTN/HDAC4/ADAM10/HDAC2	19
IDS	0	0.252879	1	1	0	0	GO:0008361	regulation of cell size	48/2012	181/18866	1.54932e-09	6.1316e-08	4.55129e-08	SPP1/HSP90AB1/APOE/DPYSL2/RTN4/MAG/GDI1/SHTN1/MAP2/AQP4/AQP1/MTPN/SEMA3D/PAK1/RTN4R/SEMA4D/MAPT/CDK5R1/NRCAM/RAC1/DBNL/PAFAH1B1/CLCN3/RUFY3/RAB21/TNR/SEMA4F/SEMA4A/SEMA3E/VEGFA/PTEN/RAP1GAP2/SPART/SLC12A5/SEMA6B/IFRD1/CLCN6/RDX/RHOA/LRP1/CDKL5/CDK5/BMPR2/IST1/LAMTOR4/SLC12A2/L1CAM/DNM2	48										R-HSA-9679506	SARS-CoV Infections	36/1351	147/10704	5.48215e-05	0.000493031	0.000315668	HSP90AA1/HSP90AB1/FXYD6/PTGES3/TUBB/CANX/UBA52/UBB/ATP1A3/ATP1B1/AP2M1/ATP1B2/FKBP1A/ATP1A2/TUSC3/UBC/CHD3/VEGFA/AP2S1/AP2B1/IFNGR1/MAN2A1/DDX5/FKBP4/PRKCSH/RPN2/RPS27A/ST6GAL1/RPN1/COMT/AP2A2/HDAC2/GANAB/UBE2I/STAT2/CHD4	36
RPL4	0	0.25263	0.999	0.997	0	0	GO:0032886	regulation of microtubule-based process	58/2012	240/18866	1.5609e-09	6.1368e-08	4.55515e-08	HSPA1A/SNCA/STMN4/STMN1/TUBB4A/TPPP/STMN3/MAPRE2/MAP2/STMN2/CNIH2/XPO1/PAK1/DCTN1/MAPRE3/MAPT/FEZ1/CDK5R1/RPS3/RAC1/PAFAH1B1/ARL2/CLTC/CLIP3/FAM107A/CHORDC1/LAMP1/KAT2A/CLASP2/PHLDB1/TAOK1/HSPA1B/MID1IP1/CHMP1B/CCP110/GNAI1/DYNC1H1/DIXDC1/MAP6D1/CHMP1A/PLK2/BMERB1/CTNNB1/FKBP4/PSRC1/DYRK1A/TRIM36/ARHGEF2/RHOA/CLASP1/HNRNPU/APC2/RBM14/CDK2AP2/RHOT1/CYLD/MAP6/NSFL1C	58										R-HSA-2565942	Regulation of PLK1 Activity at G2/M Transition	25/1351	88/10704	5.79453e-05	0.000517696	0.00033146	TUBA1A/HSP90AA1/TUBB4A/TUBB/UBA52/YWHAG/YWHAE/UBB/DYNLL1/DCTN1/PAFAH1B1/UBC/SKP1/BTRC/CCP110/SSNA1/DYNC1H1/PPP2R1A/PPP1CB/TUBA4A/RPS27A/ACTR1A/CLASP1/FBXW11/CSNK1E	25
MT-ND2	0	0.251071	1	1	0	0	GO:2000058	regulation of ubiquitin-dependent protein catabolic process	44/2012	159/18866	1.7531e-09	6.8474e-08	5.0826e-08	HSPA1A/HIPK2/HSP90AB1/DNAJB2/XPO1/RPL5/SIRT2/RPL11/CLU/RPL23/RACK1/DDRGK1/PTK2/RAD23B/BCAP31/PTEN/HSPA1B/USP14/PLK2/ZER1/GBA/USP5/FBXW7/PSEN1/CEBPA/UBE2K/RBX1/GNA12/DVL1/DESI1/HSPBP1/DDA1/RYBP/USP7/PSMD10/SGTA/MDM2/CSNK2A1/KEAP1/HERPUD1/SVIP/CSNK1E/UBXN1/WAC	44										R-HSA-5658442	Regulation of RAS by GAPs	21/1351	68/10704	5.8964e-05	0.000523354	0.000335083	UBA52/UBB/SPRED1/HRAS/UBC/RASAL1/PSMB4/RPS27A/RBX1/NF1/SYNGAP1/PSMA4/PSME1/PSMD10/PSMD4/CUL3/PSMD3/PSMB7/PSMB10/PSMF1/PSMD13	21
MT-ND1	0	0.251015	1	1	0	0	GO:0042391	regulation of membrane potential	89/2012	443/18866	2.46823e-09	9.56406e-08	7.09909e-08	SLC17A7/GABRA5/SCN3B/YWHAH/CAMK2D/APP/YWHAE/UBB/SOD1/ANK2/BIN1/ATP1A3/STX1A/GRIA1/CACNA1E/SLC8A2/ATP1B1/GJA1/CNIH2/ATP2A2/ATP1B2/ATP1A2/KCNMB4/BOK/MAPT/RACK1/NRCAM/KCNAB2/CACNA2D1/KCNK1/GABBR1/PXK/CHRM1/ARL6IP5/ATP5IF1/SLC4A3/GRIN2B/ARRB2/TSPO/NTSR2/GLRA2/TREM2/BAIAP2/ANK3/PRKCZ/PTEN/NLGN2/WDR1/GABRB3/CHRNB2/RGS4/SCN2B/DLG1/NLGN3/BNIP3/FLNA/SPART/IFI6/GBA/CACNA1I/ADORA1/KCNH3/GNAQ/MLLT11/GRIA3/GR…	89										R-HSA-202403	TCR signaling	31/1351	120/10704	6.05345e-05	0.000533804	0.000341773	HLA-DRA/UBA52/UBB/PAK1/UBC/SKP1/EVL/CDC34/HLA-DPB1/BTRC/HLA-DRB1/PAK3/PTEN/HLA-DPA1/PSMB4/PIK3R2/UBE2N/RPS27A/PSMA4/PSME1/PTPRJ/ENAH/PSMD10/FBXW11/PSMD4/PSMD3/PSMB7/PSMB10/PSMF1/PSMD13/UBE2D2	31
CALM1	0	0.250314	1	1	0	0	GO:0060291	long-term synaptic potentiation	30/2012	87/18866	2.48064e-09	9.56406e-08	7.09909e-08	MAPK1/APP/APOE/PRNP/SLC8A2/TYROBP/VAMP2/NPTN/RGS14/GRIN2B/FAM107A/TNR/LRRTM1/PRKCZ/PTEN/PLK2/NLGN3/SQSTM1/ADORA1/STX4/ADCY1/CALB1/LGMN/MPP2/NCSTN/SHISA7/STAU1/NF1/AKAP5/LRRTM2	30										R-HSA-1222556	ROS and RNS production in phagocytes	14/1351	36/10704	6.17698e-05	0.000541184	0.000346498	ATP6V0C/ATP6V1H/ATP6V1B2/ATP6V1G2/CYBA/ATP6V1A/ATP6V0E2/ATP6V0A1/ATP6V0B/ATP6V1C1/ATP6V1E1/ATP6V0D1/ATP6V1F/ATP6V1D	14
MT-ATP6	0	0.249215	1	1	0	0	GO:1903311	regulation of mRNA metabolic process	74/2012	344/18866	2.60749e-09	9.9887e-08	7.41428e-08	HSPB1/HSPA1A/YWHAZ/QKI/YWHAB/UBA52/UBB/HNRNPC/HNRNPK/XPO1/HNRNPA2B1/HNRNPA1/CELF5/MBNL2/YBX1/PAPOLA/UBC/HSPA8/PRKCD/FXR1/SET/DHX9/EIF4G1/RBM4/NOVA2/LARP1/SAFB/PSMB4/RBM10/DDX5/NCL/SRSF6/CELF3/TRA2A/DYRK1A/CNOT7/ANP32A/RPS27A/RBM23/MBNL1/PABPC1/HSF1/PCBP4/CELF2/CELF4/SRSF1/PABPC4/PSMA4/PSME1/HNRNPU/SAFB2/NBAS/TARDBP/SAMD4B/PSMD10/MAPK14/RNPS1/PSMD4/YTHDF3/YTHDF2/NUDT21/SUPT5H/NELFE/PUM1/PSMD3/PSMB…	74										R-HSA-9604323	Negative regulation of NOTCH4 signaling	18/1351	54/10704	6.45023e-05	0.000561501	0.000359507	YWHAZ/UBA52/UBB/UBC/SKP1/PSMB4/FBXW7/RPS27A/RBX1/PSMA4/PSME1/PSMD10/PSMD4/PSMD3/PSMB7/PSMB10/PSMF1/PSMD13	18
ACTB	0	0.248223	1	1	0	0	GO:0021762	substantia nigra development	20/2012	43/18866	2.8031e-09	1.06056e-07	7.87218e-08	PLP1/MBP/CNP/YWHAH/CALM3/CALM1/ACTB/YWHAE/CALM2/DYNLL1/YWHAQ/MAOB/HSPA5/SIRT2/BASP1/PADI2/CDC42/SYNGR3/GLUD1/RHOA	20										R-HSA-450294	MAP kinase activation	20/1351	64/10704	7.29553e-05	0.00063104	0.00040403	MAPK1/MAP2K1/UBA52/UBB/PPP2CB/ELK1/MAPK3/UBC/PPP2CA/SKP1/BTRC/PPP2R1A/UBE2N/JUN/RPS27A/RPS6KA2/DUSP7/MAPK14/MAP2K4/FBXW11	20
GPM6A	0	0.246065	1	1	0	0	GO:0014003	oligodendrocyte development	21/2012	47/18866	2.80402e-09	1.06056e-07	7.87218e-08	PLP1/CNTN2/NKX6-2/TPPP/MAG/ABCA2/LPAR1/MYRF/ID4/CD9/SOX10/CLU/OLIG1/FA2H/ZNF488/PTEN/HDAC11/TENM4/NCSTN/GSTP1/CNTNAP1	21										R-HSA-1980143	Signaling by NOTCH1	22/1351	74/10704	7.53579e-05	0.000647696	0.000414694	UBA52/UBB/CNTN1/UBC/SKP1/ARRB2/KAT2A/HDAC11/TBL1XR1/FBXW7/NEURL1/RBPJ/RPS27A/PSEN1/HDAC5/NCOR2/RBX1/NCSTN/DNER/HDAC4/ADAM10/HDAC2	22
MIF	0	0.245691	0.999	0.994	0	0	GO:0007163	establishment or maintenance of cell polarity	54/2012	220/18866	3.14643e-09	1.18258e-07	8.77793e-08	HSP90AA1/HSP90AB1/ACTB/CFL1/SHTN1/MAP2/GJA1/AQP1/PAK1/DCTN1/MAP4/FSCN1/ARPC5/RACK1/FEZ1/CAP2/ERBIN/JAM3/CLIC4/RAC1/PAFAH1B1/PTK2/RUFY3/CLASP2/CDC42/RIPOR2/PRKCZ/CRB2/MAP7/WDR1/SPINT2/DLG2/DLG1/DST/ACTR3/CRKL/LRRC7/RHOG/PARVB/SNX27/ARHGEF2/CAP1/RHOA/CLASP1/CRK/ARHGAP35/ACTR2/FBXW11/FAM89B/RHOC/CYTH1/FLOT2/NSFL1C/MYH9	54										R-HSA-9609736	Assembly and cell surface presentation of NMDA receptors	15/1351	41/10704	7.78743e-05	0.000665115	0.000425847	TUBA1A/TUBA1B/CAMK2D/TUBB4A/TUBB2A/NEFL/TUBB3/GRIN2B/APBA1/DLG2/DLG1/GRIN1/TUBA4A/CAMK2B/TUBB2B	15
YWHAE	0	0.244653	0.999	0.992	0	0	GO:0010771	negative regulation of cell morphogenesis involved in differentiation	32/2012	98/18866	3.48258e-09	1.30075e-07	9.65501e-08	SPP1/YWHAH/THY1/RTN4/MAG/GDI1/LINGO1/MAP2/SEMA3D/ARHGDIA/RTN4R/SEMA4D/CDK5R1/PTK2/RUFY3/TNR/SEMA4F/SEMA4A/SEMA3E/PTEN/EFNB3/DMTN/NLGN3/SPART/SEMA6B/IFRD1/PSEN1/RHOA/SYNGAP1/TRAK2/CDK5/OMG	32										R-HSA-112043	PLC beta mediated events	18/1351	55/10704	8.47068e-05	0.000718949	0.000460315	MAPK1/CALM3/CAMK2D/PRKCG/GNAO1/CALM1/CALM2/GNAZ/PRKAR1A/PDE1A/PRKCD/PRKACB/PDE1C/GNAI1/PRKAR1B/ADCY1/ADCY5/CAMK2B	18
DPYSL2	0	0.243445	1	0.998	0	0	GO:0071241	cellular response to inorganic substance	54/2012	221/18866	3.73864e-09	1.38771e-07	1.03005e-07	TF/SNCA/MAPK1/CPNE6/CALR/CAMK2D/APP/SYT1/SOD1/B2M/PRNP/HPCA/CACYBP/AQP1/NEUROD2/HSPA5/MAP1LC3A/CLIC4/MAPK3/BACE1/CAPN3/ATF4/CPNE7/SYT5/TSPO/GLRA2/NQO1/SYT17/ANK3/JUND/DLG2/RASAL1/GUCY1B1/DMTN/SYT4/BNIP3/ITPKB/ADCY1/JUN/SLC25A23/LGMN/CEBPA/HSF1/ALOX5AP/NCSTN/PARP1/CPNE5/NFE2L1/CPNE3/SYT7/CRK/ALAD/SLC12A2/DNM2	54										R-HSA-111933	Calmodulin induced events	14/1351	37/10704	8.79243e-05	0.000737044	0.0004719	CALM3/CAMK2D/PRKCG/CALM1/CALM2/PRKAR1A/PDE1A/PRKCD/PRKACB/PDE1C/PRKAR1B/ADCY1/ADCY5/CAMK2B	14
UBB	0	0.242223	1	1	0	0	GO:0010506	regulation of autophagy	74/2012	347/18866	3.88316e-09	1.43245e-07	1.06326e-07	GFAP/HSPB1/NUPR1/SNCA/PIP4K2A/UCHL1/ATP6V0C/GAPDH/PSAP/SREBF2/EEF1A1/SCOC/ATP6V1H/ATP6V1B2/BOK/SIRT2/MAPT/EIF4G2/FEZ1/ATP6V1G2/CDK5R1/TP53INP2/PIP4K2B/MAPK3/PTK2/ATP6V1A/ATP6V0E2/CAPNS1/EEF1A2/ATP6V0A1/ATP6V0B/ATP6V1C1/ATP6V1E1/ATP5IF1/VDAC1/ATP6V0D1/TSPO/WDR6/TREM2/EIF4G1/TMEM59/TRIM8/LARP1/PLK2/BNIP3/PIK3R2/GBA/FBXW7/CTSA/ATP6V1D/SPTLC2/TBC1D14/PRKAG2/HSPB8/QSOX1/EXOC7/LAMTOR2/SREBF1/MTDH/CDK5/…	74										R-HSA-111997	CaM pathway	14/1351	37/10704	8.79243e-05	0.000737044	0.0004719	CALM3/CAMK2D/PRKCG/CALM1/CALM2/PRKAR1A/PDE1A/PRKCD/PRKACB/PDE1C/PRKAR1B/ADCY1/ADCY5/CAMK2B	14
SOD1	0	0.241909	0.996	0.988	0	0	GO:0033572	transferrin transport	18/2012	36/18866	4.05301e-09	1.48594e-07	1.10296e-07	TF/ATP6V0C/ATP6AP1/ATP6V1H/ATP6V1B2/ATP6V1G2/ATP6V1A/CLTC/ATP6V0E2/ATP6V0A1/ATP6V0B/ATP6V1C1/ATP6V1E1/ATP6V0D1/ATP6V1F/ATP6V1D/ARHGAP1/DNM2	18										R-HSA-8849932	Synaptic adhesion-like molecules	10/1351	21/10704	9.35077e-05	0.000770617	0.000493396	RTN3/GRIA1/GRIN2B/DLG1/GRIA3/GRIN1/PTPRD/FLOT1/PTPRF/FLOT2	10
SELENOW	0	0.240749	1	0.996	0	0	GO:0043112	receptor metabolic process	50/2012	198/18866	4.32546e-09	1.57616e-07	1.16993e-07	SNCA/CNTN2/SH3GL2/NSF/APOE/ABCA2/GRIA1/ARF1/HPCA/AP2M1/FCER1G/NECAB2/HNRNPK/CD63/CD9/ITGB2/DNM1/CACNG3/CD81/LRPAP1/CLTC/CLTA/CALY/ARRB2/LRRTM1/VEGFA/AP2S1/PICALM/AP2B1/GRB2/APLN/CNPY2/NR1D1/PSEN1/LGMN/ARAP1/EHD3/SNX1/LRP1/LRRTM2/CDK5/RAB5A/EPS15/AP2A2/SCAP/GRK3/FLOT1/USP46/HDAC2/DNM2	50										R-HSA-418359	Reduction of cytosolic Ca++ levels	8/1351	14/10704	9.36317e-05	0.000770617	0.000493396	ATP2B4/CALM3/CALM1/CALM2/SLC8A2/ATP2A2/ATP2B3/ATP2B1	8
RTN4	0	0.240463	0.999	0.997	0	0	GO:0032412	regulation of ion transmembrane transporter activity	61/2012	265/18866	4.47537e-09	1.6209e-07	1.20314e-07	SCN3B/YWHAH/TMSB4X/FXYD6/CALM3/CAMK2D/APP/CALM1/YWHAE/CALM2/ANK2/PRNP/GRIA1/HPCA/ATP1B1/CNIH2/ATP1B2/KCNG1/FKBP1A/ATP1A2/CACNG3/VAMP2/NEFL/CACNA2D1/WNK1/SHISA9/GRIN2B/STIM1/HSPA2/TREM2/ANK3/GRIA2/CHP1/PTEN/NLGN2/MYO5A/DLG2/SCN2B/DLG1/CTSS/NLGN3/CACNB1/JPH4/GRIA3/GRIN1/STK39/NEDD4L/LRRC7/GRM5/DYSF/SHISA7/EHD3/CDK5/PRKCE/KCNIP2/ANTKMT/AKAP6/KIF5B/FKBP1B/DNM2/MINK1	61										R-HSA-8849471	PTK6 Regulates RHO GTPases, RAS GTPase and MAP kinases	8/1351	14/10704	9.36317e-05	0.000770617	0.000493396	RAC1/HRAS/BCAR1/RHOA/ELMO2/CRK/ARHGAP35/ELMO1	8
RPS28	0	0.227522	1	1	0	0	GO:0061136	regulation of proteasomal protein catabolic process	49/2012	193/18866	5.0888e-09	1.83197e-07	1.35981e-07	NUPR1/HSPA1A/HSP90AB1/PRKCG/DNAJB2/APOE/UBB/XPO1/SIRT2/RPL11/CLU/RACK1/DDRGK1/RAD23B/BCAP31/TREM2/BTRC/HSPA1B/USP14/PLK2/ZER1/GBA/USP5/FBXW7/PSEN1/CEBPA/UBE2K/RBX1/GNA12/DVL1/DESI1/HSPBP1/DDA1/RYBP/NFE2L1/PSME1/USP7/PSMD10/SGTA/MDM2/KEAP1/ALAD/HERPUD1/SVIP/CSNK1E/PSMF1/UBXN1/WAC/TMEM259	49										R-HSA-9619483	Activation of AMPK downstream of NMDARs	12/1351	29/10704	0.000102032	0.000834694	0.000534422	TUBA1A/TUBA1B/CALM3/TUBB4A/TUBB2A/CALM1/CALM2/TUBB3/MAPT/TUBA4A/PRKAG2/TUBB2B	12
CALM2	0	0.227135	1	1	0	0	GO:2000300	regulation of synaptic vesicle exocytosis	28/2012	80/18866	5.72959e-09	2.0503e-07	1.52187e-07	SYP/CALM3/PRKCG/NAPB/SYT1/STX1A/SYN1/ATP2A2/STXBP1/NCS1/BACE1/GIT1/NAPA/APBA1/DTNBP1/CPLX3/CHRNB2/SYT4/PREPL/ADCY1/DVL1/SYT7/CDK5/RAB5A/PPFIA2/RAB3GAP1/APBA2/RAP1A	28										R-HSA-2025928	Calcineurin activates NFAT	7/1351	11/10704	0.000104392	0.000848884	0.000543507	CALM3/CALM1/CALM2/PPIA/PPP3CB/FKBP1A/PPP3R1	7
PSAP	0	0.197673	1	1	0	0	GO:0048168	regulation of neuronal synaptic plasticity	22/2012	53/18866	6.39392e-09	2.27441e-07	1.68822e-07	SYP/CNTN2/APP/APOE/SLC8A2/NSMF/SYNGR1/SYNPO/NPTN/HRAS/SHISA9/SYT4/NEURL1/GRIN1/GRM5/SHISA7/CAMK2B/NF1/SYNGAP1/RAB5A/RAB3GAP1/PPFIA3	22										R-HSA-5610787	Hedgehog 'off' state	29/1351	113/10704	0.000117342	0.000948515	0.000607297	TUBA1A/TUBA1B/TUBB4A/TUBB2A/UBA52/UBB/PRKAR1A/TUBB3/UBC/SKP1/PRKACB/BTRC/PSMB4/PRKAR1B/ADCY1/TUBA4A/ADCY5/RPS27A/RBX1/PSMA4/PSME1/PSMD10/PSMD4/PSMD3/PSMB7/PSMB10/PSMF1/PSMD13/TUBB2B	29
CHI3L2	1.72106e-307	0.268337	0.185	0.016	3.78873e-303	1.72106e-305	GO:0048857	neural nucleus development	24/2012	62/18866	7.0257e-09	2.48435e-07	1.84405e-07	PLP1/MBP/CNP/YWHAH/CALM3/CALM1/ACTB/YWHAE/CALM2/DYNLL1/YWHAQ/MAOB/HSPA5/SIRT2/BASP1/CDK5R1/PADI2/CDC42/SYNGR3/CDK5R2/CHRNB2/GLUD1/NFIB/RHOA	24										R-HSA-8950505	Gene and protein expression by JAK-STAT signaling after Interleukin-12 stimulation	14/1351	38/10704	0.000123192	0.000989908	0.000633799	SOD2/MIF/SOD1/CFL1/ARF1/PPIA/RPLP0/HNRNPA2B1/CDC42/HSPA9/CAPZA1/TCP1/AIP/HNRNPDL	14
ANK2	9.41585e-307	0.25953	0.982	0.944	2.07281e-302	9.41585e-305	GO:0061387	regulation of extent of cell growth	34/2012	111/18866	7.32895e-09	2.57634e-07	1.91233e-07	SPP1/APOE/DPYSL2/RTN4/MAG/GDI1/SHTN1/MAP2/SEMA3D/PAK1/RTN4R/SEMA4D/MAPT/CDK5R1/NRCAM/DBNL/PAFAH1B1/RUFY3/RAB21/TNR/SEMA4F/SEMA4A/SEMA3E/VEGFA/SPART/SEMA6B/IFRD1/LRP1/CDKL5/CDK5/BMPR2/IST1/L1CAM/DNM2	34										R-HSA-181429	Serotonin Neurotransmitter Release Cycle	9/1351	18/10704	0.000132065	0.00105496	0.000675451	SYN2/SYT1/STX1A/SYN1/VAMP2/STXBP1/TSPOAP1/PPFIA2/PPFIA3	9
AUXG01000058.1	1.09175e-306	0.29292	0.886	0.736	2.40338e-302	1.09175e-304	GO:0043524	negative regulation of neuron apoptotic process	41/2012	149/18866	7.44288e-09	2.58844e-07	1.92132e-07	SOD2/GABRA5/HIPK2/HSP90AB1/PRKCG/FAIM2/APOE/SOD1/MAG/HSPD1/CORO1A/CX3CL1/BOK/NEFL/PTPRZ1/STXBP1/AGAP2/HRAS/ERBB3/ARRB2/GRN/SET/HYOU1/GABRB3/CHL1/TYRO3/DNAJC5/PIN1/PPT1/GRIN1/JUN/PSEN1/LGMN/RHOA/SYNGAP1/LRP1/RETREG1/NRBP2/BCL2L1/SNX6/MAP2K4	41										R-HSA-9013694	Signaling by NOTCH4	23/1351	82/10704	0.000139983	0.00111168	0.000711763	YWHAZ/UBA52/UBB/UBC/SKP1/KAT2A/PSMB4/FBXW7/RBPJ/RPS27A/PSEN1/RBX1/NCSTN/PSMA4/PSME1/PSMD10/ADAM10/PSMD4/PSMD3/PSMB7/PSMB10/PSMF1/PSMD13	23
RTN1	1.32846e-306	0.227523	0.999	0.998	2.92446e-302	1.32846e-304	GO:0006458	'de novo' protein folding	19/2012	41/18866	7.54656e-09	2.58844e-07	1.92132e-07	CD74/HSPA1A/HSPH1/PTGES3/HSPD1/FKBP1A/HSPE1/HSPA5/DNAJB1/HSPA8/HSPA2/HSPA1B/HSPA9/ST13/DNAJB4/DNAJC7/SELENOF/CCT2/FKBP1B	19										R-HSA-4641258	Degradation of DVL	18/1351	57/10704	0.000142425	0.00111666	0.000714952	UBA52/UBB/UBC/PSMB4/RPS27A/RBX1/DVL1/PSMA4/PSME1/KLHL12/PSMD10/PSMD4/CUL3/PSMD3/PSMB7/PSMB10/PSMF1/PSMD13	18
SLIT1	2.12741e-306	0.310817	0.719	0.489	4.68328e-302	2.12741e-304	GO:0022010	central nervous system myelination	14/2012	23/18866	7.57994e-09	2.58844e-07	1.92132e-07	PLP1/CNTN2/NKX6-2/MAG/ABCA2/MYRF/ID4/SOX10/CLU/FA2H/PTEN/TENM4/NCSTN/CNTNAP1	14										R-HSA-936837	Ion transport by P-type ATPases	18/1351	57/10704	0.000142425	0.00111666	0.000714952	ATP2B4/FXYD6/CALM3/CAMK2D/CALM1/CALM2/ATP1A3/ATP1B1/ATP2A2/ATP1B2/ATP1A2/ATP8A1/ATP9A/ATP2C1/ATP8A2/CAMK2B/ATP2B3/ATP2B1	18
BIN1	2.2067e-306	0.311649	0.875	0.74	4.85782e-302	2.2067e-304	GO:0032291	axon ensheathment in central nervous system	14/2012	23/18866	7.57994e-09	2.58844e-07	1.92132e-07	PLP1/CNTN2/NKX6-2/MAG/ABCA2/MYRF/ID4/SOX10/CLU/FA2H/PTEN/TENM4/NCSTN/CNTNAP1	14										R-HSA-202424	Downstream TCR signaling	26/1351	98/10704	0.00014518	0.00111666	0.000714952	HLA-DRA/UBA52/UBB/UBC/SKP1/CDC34/HLA-DPB1/BTRC/HLA-DRB1/PTEN/HLA-DPA1/PSMB4/PIK3R2/UBE2N/RPS27A/PSMA4/PSME1/PSMD10/FBXW11/PSMD4/PSMD3/PSMB7/PSMB10/PSMF1/PSMD13/UBE2D2	26
SARAF	2.61679e-306	0.232778	0.997	0.987	5.76061e-302	2.61679e-304	GO:0042026	protein refolding	14/2012	23/18866	7.57994e-09	2.58844e-07	1.92132e-07	HSP90AA1/HSPA1A/DNAJB2/B2M/HSPD1/DNAJA4/FKBP1A/HSPA5/HSPA8/HSPA2/HSPA1B/HSPA9/ST13/FKBP1B	14										R-HSA-1489509	DAG and IP3 signaling	15/1351	43/10704	0.000145544	0.00111666	0.000714952	CALM3/CAMK2D/PRKCG/CALM1/CALM2/PRKAR1A/PDE1A/PRKCD/PRKACB/PDE1C/PRKAR1B/ADCY1/ADCY5/CAMK2B/PRKCE	15
CFL1	2.77577e-305	0.207758	0.999	0.998	6.11058e-301	2.77577e-303	GO:0046928	regulation of neurotransmitter secretion	33/2012	106/18866	7.72668e-09	2.62356e-07	1.94738e-07	BAIAP3/SYP/CALM3/SNCG/PRKCG/NAPB/SYT1/STX1A/SYN1/ATP2A2/KCNMB4/STXBP1/NCS1/BACE1/GIT1/NAPA/APBA1/DTNBP1/CPLX3/CHRNB2/SYT4/PREPL/ADCY1/DVL1/NF1/SYT7/CDK5/RAB5A/PPFIA2/RAB3GAP1/RHOT1/APBA2/RAP1A	33										R-HSA-5675221	Negative regulation of MAPK pathway	15/1351	43/10704	0.000145544	0.00111666	0.000714952	MAPK1/MAP2K1/YWHAB/UBA52/UBB/PPP2CB/MAPK3/HRAS/UBC/PPP2CA/PEBP1/PPP2R1A/RPS27A/DUSP7/PPP2R5C	15
AIF1	3.61422e-304	0.307402	0.409	0.163	7.95634e-300	3.61422e-302	GO:0016050	vesicle organization	72/2012	340/18866	8.58311e-09	2.89789e-07	2.15101e-07	SLC17A7/BAIAP3/SNCA/SYP/CALR/NSF/SYT1/STX1A/GRIA1/S100A10/ARF1/SNX3/CORO1A/AP2M1/CNIH2/DNM1/SNAP91/VAMP2/STXBP1/SEPTIN8/RAB7A/TMED9/PAFAH1B1/CLCN3/NAPA/PTPRN/SERPINA1/VPS41/PPP6R1/VAPA/PICALM/STX7/ZEB2/DTNBP1/CPLX3/CHMP1B/SORT1/CHMP1A/SYT4/RAB5B/TMED2/SQSTM1/PEF1/RAB8B/STX4/SYNJ1/HGS/TBPL1/TRAPPC1/DYSF/TRAPPC2L/CNIH1/PREB/AKTIP/SYT7/RAB22A/TMEM127/SNX10/EPS15/SCAP/KLHL12/IST1/VAPB/AGFG1/KIF5B/CUL…	72										R-HSA-9656223	Signaling by RAF1 mutants	15/1351	43/10704	0.000145544	0.00111666	0.000714952	MAPK1/CALM3/CAMK2D/MAP2K1/YWHAB/CALM1/ACTB/CALM2/MAPK3/HRAS/ARRB2/CAMK2B/CNKSR2/TLN1/RAP1A	15
MAG	3.62264e-303	0.367015	0.441	0.191	7.97489e-299	3.62264e-301	GO:0008360	regulation of cell shape	42/2012	156/18866	9.90915e-09	3.3268e-07	2.46938e-07	ERMN/LPAR1/CORO1A/ITGB2/SEMA4D/RAC1/PTK2/CSF1R/FMNL2/SEMA4A/PLXNB1/CDC42SE2/BAIAP2/SEMA3E/VEGFA/PALM/CFDP1/WDR1/RHOU/DMTN/FAM171A1/DLG1/SEPTIN7/PLXND1/RHOG/CDC42EP1/PARVB/ARAP1/GNA12/PLXNC1/RDX/RHOA/CRK/ARHGAP35/PLXNA2/BRWD1/SH3KBP1/PLXNA1/MYL12B/TPM1/RHOC/MYH9	42										R-HSA-6802952	Signaling by BRAF and RAF fusions	20/1351	67/10704	0.000148409	0.00113224	0.000724929	MAPK1/QKI/CALM3/CAMK2D/MAP2K1/YWHAB/CALM1/ACTB/CALM2/MAPK3/HRAS/ARRB2/FXR1/PEBP1/CLCN6/CAMK2B/CNKSR2/PAPSS1/TLN1/RAP1A	20
DKK3	4.23545e-303	0.219353	1	1	9.32392e-299	4.23545e-301	GO:1903305	regulation of regulated secretory pathway	43/2012	162/18866	1.05429e-08	3.50329e-07	2.60038e-07	BAIAP3/SYP/CALM3/PRKCG/NAPB/SYT1/STX1A/ARF1/SYN1/FCER1G/ATP2A2/ITGB2/STXBP1/ABR/NCS1/BACE1/GIT1/NAPA/SYT5/LAMP1/SYT17/APBA1/DTNBP1/CPLX3/DOC2A/CDK5R2/CHRNB2/SYT4/CACNA1I/PREPL/STX4/ADCY1/DVL1/STXBP3/SCAMP5/SYT7/RAB15/CDK5/RAB5A/PPFIA2/RAB3GAP1/APBA2/RAP1A	43										R-HSA-5205685	PINK1-PRKN Mediated Mitophagy	10/1351	22/10704	0.000152123	0.00115409	0.000738919	UBA52/UBB/MAP1LC3A/UBC/VDAC1/SQSTM1/TOMM70/RPS27A/TOMM22/TOMM20	10
SERINC1	1.51144e-302	0.228466	0.998	0.99	3.32728e-298	1.51144e-300	GO:0035303	regulation of dephosphorylation	51/2012	209/18866	1.05521e-08	3.50329e-07	2.60038e-07	PPP1R14A/HSP90B1/HSP90AB1/CALM3/ARPP19/YWHAB/CALM1/YWHAE/CALM2/NSMF/FKBP1A/SEMA4D/SPRED1/PPP2R2C/PHACTR3/ARFGEF3/ENSA/PTPA/WNK1/FARP1/PRKCD/BAG4/ELFN2/SET/SLC39A10/PPP6R1/CHP1/DLG2/PPP2R1A/SYTL2/SPPL3/GBA/ADORA1/PIN1/SLC7A14/SMPD1/PPP1R16B/PPP4R4/B3GAT3/PPP1R10/CABIN1/PPP1R11/CD2BP2/DUSP26/RIMBP2/RBM26/CDK5RAP3/FKBP1B/PPP1R37/PPP2R5C/PPP2R2B	51										R-HSA-901042	Calnexin/calreticulin cycle	11/1351	26/10704	0.000156691	0.00118215	0.000756883	CALR/CANX/UBA52/UBB/UBC/PDIA3/SEL1L/PRKCSH/RPS27A/GANAB/RNF5	11
ATP1A3	4.11679e-302	0.258533	0.98	0.944	9.0627e-298	4.11679e-300	GO:0030516	regulation of axon extension	31/2012	97/18866	1.08763e-08	3.57125e-07	2.65082e-07	APOE/DPYSL2/RTN4/MAG/GDI1/SHTN1/MAP2/SEMA3D/PAK1/RTN4R/SEMA4D/MAPT/CDK5R1/NRCAM/DBNL/PAFAH1B1/RUFY3/RAB21/TNR/SEMA4F/SEMA4A/SEMA3E/VEGFA/SEMA6B/IFRD1/LRP1/CDKL5/CDK5/BMPR2/L1CAM/DNM2	31										R-HSA-9006925	Intracellular signaling by second messengers	61/1351	306/10704	0.000160505	0.00120423	0.000771022	PIP4K2A/MAPK1/CALM3/CAMK2D/PRKCG/UBA52/CALM1/UBB/CALM2/PPP2CB/PRKAR1A/PDE1A/PIP4K2B/RAC1/MAPK3/FGF1/UBC/CHD3/ERBB3/PPP2CA/PRKCD/PRKACB/PTEN/GRB2/PDE1C/PSMB4/PRKAR1B/PPP2R1A/PIK3R2/PIP5K1C/CBX6/ADCY1/JUN/ADCY5/RPS27A/RHOG/HDAC5/CAMK2B/FGFR2/PSMA4/PSME1/LAMTOR2/PRKCE/USP7/TNKS2/PSMD10/MDM2/LAMTOR4/HDAC2/CSNK2A1/PSMD4/PSMD3/PSMB7/PPP2R5C/RNF146/PSMB10/PSMF1/PHLPP1/PSMD13/CHD4/MAF1	61
ABCA2	7.8285e-302	0.377146	0.834	0.7	1.72337e-297	7.8285e-300	GO:1901216	positive regulation of neuron death	31/2012	97/18866	1.08763e-08	3.57125e-07	2.65082e-07	C1QA/NUPR1/SNCA/PRNP/DDIT4/ITGB2/TYROBP/CLU/MAPT/CDK5R1/ELK1/BACE1/GRIN2B/ATF4/NQO1/CDC34/GRN/CDC42/PICALM/PAK3/CTNNB1/FBXW7/ADORA1/PIN1/JUN/RHOA/PARP1/NF1/CDK5/HDAC4/MAP2K4	31										R-HSA-195253	Degradation of beta-catenin by the destruction complex	23/1351	83/10704	0.000170898	0.00127516	0.000816435	UBA52/UBB/PPP2CB/UBC/PPP2CA/SKP1/BTRC/TLE5/PSMB4/CTNNB1/PPP2R1A/RPS27A/RBX1/PSMA4/PSME1/PSMD10/PSMD4/PSMD3/PSMB7/PPP2R5C/PSMB10/PSMF1/PSMD13	23
STX1A	5.67035e-301	0.295099	0.836	0.654	1.24827e-296	5.67035e-299	GO:0106027	neuron projection organization	30/2012	92/18866	1.10544e-08	3.6099e-07	2.67951e-07	APP/APOE/CFL1/ATP1A3/PRNP/ARF1/DCTN1/KIF1A/CTNND2/CDK5R1/SRCIN1/DBNL/PAFAH1B1/OPA1/GRIN2B/BAIAP2/CDC42/PAK3/PTEN/NLGN3/ABI2/PSEN1/LGMN/DVL1/CAMK2B/CDK5/TANC2/ACTR2/PPFIA2/ADAM10	30										R-HSA-432720	Lysosome Vesicle Biogenesis	13/1351	35/10704	0.000194999	0.00144704	0.000926481	APP/SH3GL2/DNAJC6/ARF1/VAMP2/CLTC/CLTA/HSPA8/HGS/M6PR/CLTB/AP1S1/DNM2	13
B2M	4.87733e-300	0.275971	0.979	0.946	1.0737e-295	4.87733e-298	GO:0007411	axon guidance	63/2012	284/18866	1.1512e-08	3.7389e-07	2.77526e-07	MAPK1/CNTN2/NCAM1/APP/DPYSL2/SLIT1/SPTBN1/SEMA3D/SEMA4D/GAP43/SLIT3/TUBB3/FEZ1/RAP1GAP/CDK5R1/NRCAM/NFASC/NPTN/RAC1/MAPK3/PTK2/BSG/CHN1/CSF1R/KIF5C/SPTAN1/MATN2/TNR/EVL/SEMA4F/DPYSL5/SEMA4A/PTPRA/PLXNB1/SEMA3E/VEGFA/GRB2/NECTIN1/EFNB3/CHL1/FEZF2/SEMA6B/PLXND1/TMEFF1/ALCAM/RHOG/NFIB/PLXNC1/DVL1/RANBP9/LRP1/ENAH/ARHGAP35/CDK5/ZSWIM8/BMPR2/PLXNA2/SH3KBP1/PLXNA1/KIF5B/USP33/L1CAM/TUBB2B	63										R-HSA-5687128	MAPK6/MAPK4 signaling	24/1351	89/10704	0.000196931	0.00145344	0.000930579	HSPB1/UBA52/UBB/XPO1/PAK1/RAC1/DNAJB1/UBC/PRKACB/CDC42/PAK3/PSMB4/SEPTIN7/JUN/RPS27A/PSMA4/PSME1/PSMD10/PSMD4/PSMD3/PSMB7/PSMB10/PSMF1/PSMD13	24
PRNP	8.87958e-298	0.222953	1	0.998	1.95475e-293	8.87958e-296	GO:0097485	neuron projection guidance	63/2012	285/18866	1.32685e-08	4.28609e-07	3.18143e-07	MAPK1/CNTN2/NCAM1/APP/DPYSL2/SLIT1/SPTBN1/SEMA3D/SEMA4D/GAP43/SLIT3/TUBB3/FEZ1/RAP1GAP/CDK5R1/NRCAM/NFASC/NPTN/RAC1/MAPK3/PTK2/BSG/CHN1/CSF1R/KIF5C/SPTAN1/MATN2/TNR/EVL/SEMA4F/DPYSL5/SEMA4A/PTPRA/PLXNB1/SEMA3E/VEGFA/GRB2/NECTIN1/EFNB3/CHL1/FEZF2/SEMA6B/PLXND1/TMEFF1/ALCAM/RHOG/NFIB/PLXNC1/DVL1/RANBP9/LRP1/ENAH/ARHGAP35/CDK5/ZSWIM8/BMPR2/PLXNA2/SH3KBP1/PLXNA1/KIF5B/USP33/L1CAM/TUBB2B	63										R-HSA-416700	Other semaphorin interactions	9/1351	19/10704	0.000222919	0.00162096	0.00103783	TYROBP/SEMA4D/SEMA4A/TREM2/SEMA3E/PLXND1/PLXNC1/PLXNA2/PLXNA1	9
GRIA1	4.29341e-297	0.304263	0.614	0.358	9.45152e-293	4.29341e-295	GO:0006885	regulation of pH	32/2012	103/18866	1.37211e-08	4.40845e-07	3.27225e-07	MAPK1/ATP6V0C/ATP6AP1/ATP6V1H/ATP6V1B2/EDNRB/ATP6V1G2/CLIC4/RAB7A/MAPK3/ATP6AP2/ATP6V1A/CLCN3/ATP6V0E2/ATP6V0A1/ATP6V0B/ATP6V1C1/ATP6V1E1/SLC4A3/ATP6V0D1/TMEM165/GRN/CA2/ATP6V1F/CHP1/SLC9A6/ROGDI/ATP6V1D/PPT1/DMXL2/CCKBR/MAFG	32										R-HSA-8964038	LDL clearance	9/1351	19/10704	0.000222919	0.00162096	0.00103783	AP2M1/LIPA/CLTC/CLTA/NPC2/AP2S1/AP2B1/NCEH1/AP2A2	9
S100A10	9.12372e-297	0.325189	0.475	0.218	2.0085e-292	9.12372e-295	GO:0060998	regulation of dendritic spine development	27/2012	78/18866	1.40265e-08	4.48249e-07	3.32721e-07	APOE/CFL1/LPAR1/ARF1/KIF1A/CDK5R1/SRCIN1/DBNL/PAFAH1B1/CAMK1/OPA1/BAIAP2/PAK3/PTEN/PLK2/NLGN3/ABI2/NEURL1/PSEN1/CAMK2B/CDKL5/CDK5/TANC2/ACTR2/PPFIA2/ADAM10/HDAC2	27										R-HSA-3371511	HSF1 activation	7/1351	12/10704	0.00022321	0.00162096	0.00103783	HSP90AA1/HSP90AB1/PTGES3/YWHAE/EEF1A1/HSBP1/HSF1	7
NDFIP1	3.17616e-296	0.248081	0.991	0.969	6.992e-292	3.17616e-294	GO:0008347	glial cell migration	22/2012	55/18866	1.45534e-08	4.60165e-07	3.41565e-07	RTN4/SUN2/ATP1B2/CX3CL1/CD9/MBOAT7/ADGRG1/CDK5R1/PAFAH1B1/MATN2/TSPO/TREM2/CDK5R2/ZMIZ1/BMERB1/CTNNB1/CRKL/CERS2/SRGAP2/LRP1/CDK5/NDN	22										R-HSA-3371453	Regulation of HSF1-mediated heat shock response	20/1351	69/10704	0.000230925	0.00166806	0.00106799	HSPA1A/MAPK1/HSPH1/YWHAE/HSPA5/HSPA4/MAPK3/DNAJB1/HSPA8/BAG4/HSPA2/HSPA1B/HSPA9/HSPA4L/ST13/HSPA12A/DNAJC7/HSF1/DNAJB6/SEH1L	20
TSC22D4	5.43993e-295	0.29482	0.933	0.851	1.19755e-290	5.43993e-293	GO:0051452	intracellular pH reduction	22/2012	55/18866	1.45534e-08	4.60165e-07	3.41565e-07	ATP6V0C/ATP6V1H/ATP6V1B2/ATP6V1G2/CLIC4/RAB7A/ATP6AP2/ATP6V1A/CLCN3/ATP6V0E2/ATP6V0A1/ATP6V0B/ATP6V1C1/ATP6V1E1/ATP6V0D1/GRN/CA2/ATP6V1F/ROGDI/ATP6V1D/PPT1/DMXL2	22										R-HSA-212676	Dopamine Neurotransmitter Release Cycle	10/1351	23/10704	0.000238864	0.00171628	0.00109887	SYN2/SYT1/STX1A/SYN1/VAMP2/STXBP1/APBA1/TSPOAP1/PPFIA2/PPFIA3	10
SEPTIN4	1.12523e-293	0.402766	0.819	0.672	2.47709e-289	1.12523e-291	GO:0043393	regulation of protein binding	51/2012	211/18866	1.48196e-08	4.66115e-07	3.45982e-07	HIPK2/HSP90AB1/STMN1/APP/DNAJB2/APOE/ACTB/B2M/MAP2/ATP2A2/FKBP1A/PPP2CB/MAPRE3/RPL11/RACK1/LRPAP1/MAPK3/CAMK1/PPP2CA/PRKCD/ARRB2/SMARCD3/CDC42/RIPOR2/RAN/TLE5/DTNBP1/PCBD1/PPP1CA/PLK2/SPPL3/PLXND1/PIN1/PSEN1/HDAC5/HSF1/TMBIM6/LDOC1/DVL1/DERL1/LRP1/AKTIP/CRK/CDK5/HDAC4/FLOT1/PTPRF/BTBD1/USP33/CYLD/CSNK1E	51										R-HSA-5607764	CLEC7A (Dectin-1) signaling	26/1351	101/10704	0.000245948	0.00175788	0.0011255	CALM3/UBA52/CALM1/UBB/CALM2/PPP3CB/UBC/SKP1/PRKCD/CDC34/BTRC/PSMB4/UBE2N/RPS27A/PSMA4/PSME1/PPP3R1/PSMD10/FBXW11/PSMD4/PSMD3/PSMB7/PSMB10/PSMF1/PSMD13/UBE2D2	26
APLNR	1.20867e-293	0.268285	0.35	0.112	2.66077e-289	1.20867e-291	GO:0010256	endomembrane system organization	90/2012	468/18866	1.84095e-08	5.75997e-07	4.27543e-07	BAIAP3/YWHAZ/SYP/MAPK1/MAP2K1/SH3GL2/RTN3/SOD1/RTN4/PSAP/ANK2/BIN1/MYRF/SNX3/SHTN1/SPTBN1/SUN2/ATP2A2/ARL6IP1/DNM1/TMEFF2/DCTN1/SYNGR1/CLU/RAB7A/TMED9/PAFAH1B1/MAPK3/CLCN3/PDE4DIP/RAB2A/FA2H/PACSIN1/PPP2CA/PTPRN/PRKCD/NDRG1/BAIAP2/ANK3/CLASP2/CDC42/PTEN/CTDNEP1/DTNBP1/CHMP1B/MYO5A/SURF4/ARHGAP21/CHMP1A/SYT4/RAB5B/PPP2R1A/TMED2/SQSTM1/COG1/ANO3/ATL1/STX4/SYNJ1/HGS/TBPL1/DYSF/TMEM33/GET1/S100A9/CLA…	90										R-HSA-6794361	Neurexins and neuroligins	17/1351	55/10704	0.000288928	0.00204034	0.00130635	SYT1/STX1A/STXBP1/DBNL/GRIN2B/LRRTM1/NRXN2/APBA1/NLGN2/DLG2/DLGAP4/NLGN3/GRIN1/GRM5/LRRTM2/SYT7/APBA2	17
ENPP2	1.29835e-293	0.332533	0.364	0.133	2.85819e-289	1.29835e-291	GO:0032434	regulation of proteasomal ubiquitin-dependent protein catabolic process	37/2012	131/18866	1.85876e-08	5.78539e-07	4.2943e-07	HSPA1A/HSP90AB1/DNAJB2/XPO1/SIRT2/RPL11/CLU/RACK1/DDRGK1/RAD23B/BCAP31/HSPA1B/USP14/PLK2/ZER1/GBA/USP5/PSEN1/CEBPA/UBE2K/RBX1/GNA12/DVL1/DESI1/HSPBP1/DDA1/RYBP/USP7/PSMD10/SGTA/MDM2/KEAP1/HERPUD1/SVIP/CSNK1E/UBXN1/WAC	37										R-HSA-8873719	RAB geranylgeranylation	19/1351	65/10704	0.00029146	0.00204034	0.00130635	PTP4A2/RAB6B/RAB7A/RAB3B/RAB2A/RAB27B/RAB21/RAB3C/RAB40B/RAB5B/RAB6A/RAB8B/RAB15/RAB22A/RAB5A/RAB26/RAB4B/RAB4A/RAB1A	19
LPAR1	2.95241e-292	0.325201	0.366	0.134	6.49944e-288	2.95241e-290	GO:0030641	regulation of cellular pH	30/2012	94/18866	1.93617e-08	5.99512e-07	4.44998e-07	MAPK1/ATP6V0C/ATP6AP1/ATP6V1H/ATP6V1B2/ATP6V1G2/CLIC4/RAB7A/MAPK3/ATP6AP2/ATP6V1A/CLCN3/ATP6V0E2/ATP6V0A1/ATP6V0B/ATP6V1C1/ATP6V1E1/SLC4A3/ATP6V0D1/TMEM165/GRN/CA2/ATP6V1F/CHP1/SLC9A6/ROGDI/ATP6V1D/PPT1/DMXL2/MAFG	30										R-HSA-5610780	Degradation of GLI1 by the proteasome	18/1351	60/10704	0.00029298	0.00204034	0.00130635	UBA52/UBB/UBC/SKP1/PRKACB/BTRC/PSMB4/RPS27A/RBX1/PSMA4/PSME1/PSMD10/PSMD4/PSMD3/PSMB7/PSMB10/PSMF1/PSMD13	18
GDI1	2.44842e-291	0.232545	0.998	0.986	5.38994e-287	2.44842e-289	GO:0031623	receptor internalization	34/2012	115/18866	1.98503e-08	6.11471e-07	4.53875e-07	SNCA/CNTN2/SH3GL2/GRIA1/ARF1/HPCA/AP2M1/FCER1G/NECAB2/CD63/CD9/ITGB2/DNM1/CACNG3/CD81/LRPAP1/CLTC/CALY/ARRB2/LRRTM1/VEGFA/PICALM/AP2B1/GRB2/APLN/SNX1/LRP1/LRRTM2/RAB5A/EPS15/GRK3/FLOT1/USP46/DNM2	34										R-HSA-5610783	Degradation of GLI2 by the proteasome	18/1351	60/10704	0.00029298	0.00204034	0.00130635	UBA52/UBB/UBC/SKP1/PRKACB/BTRC/PSMB4/RPS27A/RBX1/PSMA4/PSME1/PSMD10/PSMD4/PSMD3/PSMB7/PSMB10/PSMF1/PSMD13	18
AK5	3.35126e-289	0.28873	0.959	0.878	7.37745e-285	3.35126e-287	GO:0032273	positive regulation of protein polymerization	38/2012	137/18866	2.05874e-08	6.30925e-07	4.68315e-07	HSP90AA1/HSPA1A/TPPP/BIN1/ARF1/CORO1A/PAK1/DCTN1/ARPC5/PFN1/MAPT/CDK5R1/RPS3/RAC1/ARL2/BAG4/ARPC4/EVL/BAIAP2/HSPA1B/GRB2/ARPC3/GMFB/ACTR3B/DLG1/ABI2/ACTR3/PSRC1/ARPC1B/NCKAP1/CDC42EP1/BRK1/RHOA/CLASP1/PRKCE/ACTR2/ARPC1A/TPPP3	38										R-HSA-5610785	GLI3 is processed to GLI3R by the proteasome	18/1351	60/10704	0.00029298	0.00204034	0.00130635	UBA52/UBB/UBC/SKP1/PRKACB/BTRC/PSMB4/RPS27A/RBX1/PSMA4/PSME1/PSMD10/PSMD4/PSMD3/PSMB7/PSMB10/PSMF1/PSMD13	18
CNDP1	2.96424e-288	0.305194	0.321	0.103	6.52547e-284	2.96424e-286	GO:0007416	synapse assembly	46/2012	184/18866	2.4801e-08	7.56177e-07	5.61286e-07	SNCA/CLSTN2/APP/GPM6A/SLIT1/CLSTN1/SEMA4D/GAP43/ADGRL3/NRCAM/NPTN/DBNL/PTK2/PCDH17/FARP1/SEMA4A/BSN/PLXNB1/LRRTM1/NRXN2/EIF4G1/PTEN/NECTIN1/NLGN2/SPOCK2/GABRB3/CHRNB2/NLGN3/ADGRB2/GNPAT/PLXND1/CRKL/CLSTN3/GRIN1/PCLO/DVL1/ADGRB3/LRRTM2/PTPRD/DNER/CDK5/SLC25A46/SLITRK1/GABRA2/CDH2/LRRC4B	46										R-HSA-392517	Rap1 signalling	8/1351	16/10704	0.000317521	0.0021888	0.0014014	YWHAZ/YWHAB/RAP1GAP/PRKACB/RASGRP1/RAP1GAP2/RAPGEF4/RAP1A	8
PKP4	2.95125e-287	0.306225	0.556	0.299	6.49689e-283	2.95125e-285	GO:0008064	regulation of actin polymerization or depolymerization	47/2012	190/18866	2.50226e-08	7.59061e-07	5.63426e-07	TMSB4X/TMSB10/BIN1/CFL1/ARF1/CORO1A/SPTBN1/MTPN/ARPC5/PFN1/CYFIP2/CAPZB/DBNL/SPTAN1/PRKCD/BAG4/ARPC4/EVL/PREX1/BAIAP2/PAK3/GRB2/ARPC3/WDR1/GMFB/DMTN/CAPZA1/DSTN/ACTR3B/DLG1/ABI2/ACTR3/ARPC1B/NCKAP1/HCLS1/CFL2/CDC42EP1/PDXP/RDX/BRK1/RHOA/CAPG/ARHGAP35/PRKCE/HAX1/ACTR2/ARPC1A	47										R-HSA-399954	Sema3A PAK dependent Axon repulsion	8/1351	16/10704	0.000317521	0.0021888	0.0014014	HSP90AA1/HSP90AB1/CFL1/PAK1/RAC1/PAK3/PLXNA2/PLXNA1	8
TMEM151A	2.69811e-286	0.281065	0.493	0.241	5.93963e-282	2.69811e-284	GO:0051668	localization within membrane	30/2012	95/18866	2.54345e-08	7.6766e-07	5.69809e-07	THY1/APOE/ATP1B1/CNIH2/ITGB2/CACNG3/CD81/CD24/RAC1/CDH13/MAL/NRXN2/SSNA1/DLG2/DLG1/FLNA/CRKL/LRRC7/GLRB/ETV5/SHISA7/DVL1/SYNGAP1/RILPL1/CDK5/NAXE/SCAP/RAB1A/CDH2/YJEFN3	30										R-HSA-9679191	Potential therapeutics for SARS	22/1351	81/10704	0.000320778	0.00220008	0.00140862	HSP90AA1/HSP90AB1/FXYD6/PTGES3/TUBB/ATP1A3/ATP1B1/AP2M1/ATP1B2/FKBP1A/ATP1A2/CHD3/VEGFA/AP2S1/AP2B1/IFNGR1/FKBP4/COMT/AP2A2/HDAC2/STAT2/CHD4	22
ARF1	7.77603e-286	0.257401	0.974	0.919	1.71181e-281	7.77603e-284	GO:0048678	response to axon injury	27/2012	80/18866	2.59994e-08	7.80765e-07	5.79537e-07	SPP1/APOD/MAP2K1/SOD1/AIF1/MAG/TYROBP/RTN4R/DPYSL3/GAP43/NEFL/JAM3/MAPK8IP3/MATN2/TNR/TSPO/RANGAP1/GRN/RTN4RL2/PTEN/BNIP3/JUN/CERS2/LRP1/TXN2/PTPRF/FKBP1B	27										R-HSA-164952	The role of Nef in HIV-1 replication and disease pathogenesis	11/1351	28/10704	0.0003425	0.00233726	0.00149646	B2M/ARF1/AP2M1/ATP6V1H/HLA-A/RAC1/AP2S1/AP2B1/AP2A2/ELMO1/AP1S1	11
GNG2	4.9329e-285	0.294835	0.819	0.642	1.08593e-280	4.9329e-283	GO:0030832	regulation of actin filament length	47/2012	191/18866	2.98066e-08	8.90622e-07	6.61079e-07	TMSB4X/TMSB10/BIN1/CFL1/ARF1/CORO1A/SPTBN1/MTPN/ARPC5/PFN1/CYFIP2/CAPZB/DBNL/SPTAN1/PRKCD/BAG4/ARPC4/EVL/PREX1/BAIAP2/PAK3/GRB2/ARPC3/WDR1/GMFB/DMTN/CAPZA1/DSTN/ACTR3B/DLG1/ABI2/ACTR3/ARPC1B/NCKAP1/HCLS1/CFL2/CDC42EP1/PDXP/RDX/BRK1/RHOA/CAPG/ARHGAP35/PRKCE/HAX1/ACTR2/ARPC1A	47										R-HSA-5357801	Programmed Cell Death	41/1351	190/10704	0.000347316	0.00235828	0.00150991	HSP90AA1/YWHAZ/YWHAH/MAPK1/YWHAB/UBA52/YWHAG/YWHAE/UBB/SEPTIN4/DYNLL1/YWHAQ/MAPT/DBNL/MAPK3/PTK2/DYNLL2/UBC/BCAP31/OPA1/SPTAN1/PRKCD/PSMB4/CTNNB1/RPS27A/PSMA4/PSME1/PPP3R1/NMT1/PSMD10/FLOT1/BCL2L1/PSMD4/PSMD3/PSMB7/PSMB10/PSMF1/FLOT2/PSMD13/KPNB1/VIM	41
MYRF	1.54925e-284	0.350491	0.357	0.132	3.41052e-280	1.54925e-282	GO:0031109	microtubule polymerization or depolymerization	34/2012	117/18866	3.19604e-08	9.50226e-07	7.05322e-07	CRYAB/HSPA1A/SNCA/STMN4/STMN1/TUBB4A/TPPP/STMN3/MAPRE2/MAP2/STMN2/PAK1/DCTN1/MAPRE3/MAPT/CDK5R1/RPS3/RAC1/ARL2/CLIP3/CLASP2/TAOK1/HSPA1B/MID1IP1/MAP6D1/BMERB1/FKBP4/PSRC1/DYRK1A/ARHGEF2/CLASP1/RANBP9/APC2/TPPP3	34										R-HSA-5627117	RHO GTPases Activate ROCKs	9/1351	20/10704	0.000360138	0.00243153	0.00155682	CFL1/PAK1/MYL6/PPP1CB/RHOA/MYL12B/MYL9/RHOC/MYH9	9
CNTN1	3.03381e-284	0.277354	0.939	0.858	6.67862e-280	3.03381e-282	GO:0050772	positive regulation of axonogenesis	28/2012	86/18866	3.51232e-08	1.03909e-06	7.71282e-07	MAP2K1/GDI1/SHTN1/PAK1/ARHGDIA/SEMA4D/NEFL/MAPT/DBNL/PAFAH1B1/RUFY3/PLXNB1/VEGFA/ZEB2/PLXND1/METRN/PLXNC1/RHOA/LRP1/CDKL5/SLITRK1/BMPR2/PLXNA2/IST1/PLXNA1/MAP6/L1CAM/TUBB2B	28										R-HSA-210500	Glutamate Neurotransmitter Release Cycle	10/1351	24/10704	0.000363477	0.00243153	0.00155682	SLC17A7/SYT1/STX1A/GLS/VAMP2/STXBP1/ARL6IP5/TSPOAP1/PPFIA2/PPFIA3	10
RPS6	2.23622e-282	0.25722	0.989	0.98	4.92282e-278	2.23622e-280	GO:0099175	regulation of postsynapse organization	32/2012	107/18866	3.79983e-08	1.11861e-06	8.30307e-07	APOE/CFL1/PRNP/GAP43/KIF1A/CDK5R1/NRCAM/SRCIN1/DBNL/PAFAH1B1/HSPA8/OPA1/GRIN2B/LRRTM1/BAIAP2/PAK3/PTEN/NLGN3/ABI2/CRKL/SHISA7/CAMK2B/CDKL5/LRRTM2/PTPRD/CDK5/TANC2/ACTR2/PPFIA2/ADAM10/CDH2/LRRC4B	32										R-HSA-5668599	RHO GTPases Activate NADPH Oxidases	10/1351	24/10704	0.000363477	0.00243153	0.00155682	MAPK1/RAC1/CYBA/MAPK3/PRKCD/PRKCZ/S100A8/PIN1/S100A9/MAPK14	10
ID4	1.21405e-280	0.303127	0.606	0.355	2.67261e-276	1.21405e-278	GO:0042326	negative regulation of phosphorylation	91/2012	484/18866	4.65559e-08	1.36381e-06	1.01232e-06	HSPB1/NUPR1/DBNDD2/SNCA/THY1/CALM3/DNAJA1/SH3GL2/UCHL1/APOE/YWHAG/CALM1/CALM2/PRNP/DYNLL1/DDIT4/SEMA4D/SIRT2/SPRED1/PRKAR1A/MAPK8IP1/MAPT/RACK1/SIRPA/SRCIN1/PTPRR/PAFAH1B1/RGS14/PHB/CAMK2N1/WNK1/RASSF2/PPP2CA/HMGCR/PRKCD/ARRB2/PKIA/CHORDC1/IPO7/CHP1/EIF4G1/PRKCZ/PTEN/DTNBP1/GMFB/PEBP1/SH3BP5/RGS4/DMTN/TERF2IP/DLG1/PRKAR1B/PPP2R1A/PIK3R2/GBA/GSKIP/ADAR/CDKN1C/PIN1/GNAQ/CRKL/JUN/PSEN1/CADM4/CEBPA/S…	91										R-HSA-5578775	Ion homeostasis	17/1351	56/10704	0.000366797	0.00244171	0.00156333	ATP2B4/FXYD6/CALM3/CAMK2D/CALM1/CALM2/ATP1A3/SLC8A2/ATP1B1/ATP2A2/ATP1B2/ATP1A2/STIM1/CAMK2B/ATP2B3/ATP2B1/FKBP1B	17
RPL13A	5.85634e-279	0.216806	0.998	0.995	1.28922e-274	5.85634e-277	GO:0090083	regulation of inclusion body assembly	11/2012	16/18866	5.19017e-08	1.513e-06	1.12305e-06	HSPA1A/DNAJB2/DNAJA4/CLU/DNAJB1/CDC34/HSPA2/HSPA1B/HSF1/DNAJB6/SACS	11										R-HSA-5358351	Signaling by Hedgehog	34/1351	149/10704	0.000371016	0.00245775	0.0015736	TUBA1A/TUBA1B/TUBB4A/TUBB2A/UBA52/UBB/PRKAR1A/TUBB3/HHIP/UBC/SKP1/ARRB2/PRKACB/SEL1L/BTRC/PSMB4/PRKAR1B/ADCY1/TUBA4A/ADCY5/RPS27A/RBX1/PSMA4/PSME1/P4HB/PSMD10/PSMD4/CUL3/PSMD3/PSMB7/PSMB10/PSMF1/PSMD13/TUBB2B	34
CACNA1E	8.14454e-279	0.28763	0.525	0.277	1.79294e-274	8.14454e-277	GO:0006898	receptor-mediated endocytosis	68/2012	328/18866	5.30289e-08	1.53835e-06	1.14187e-06	TF/C3/HSP90AA1/APOC1/HSP90B1/SNCA/CNTN2/HSPH1/CALR/SH3GL2/DNAJC6/CANX/APOE/ABCA2/B2M/GRIA1/ARF1/HPCA/AP2M1/FCER1G/NECAB2/HNRNPK/CD63/CD9/ITGB2/DNM1/SNAP91/CACNG3/CD81/CLU/LRPAP1/APOC2/RAC1/DBNL/CLTC/SH3GL3/CLTA/CALY/RAB21/ARRB2/LRRTM1/VEGFA/AP2S1/PICALM/AP2B1/GRB2/HYOU1/APLN/NLGN3/STAB1/PIP5K1C/PPT1/M6PR/CLTB/CD163/CAP1/SGIP1/SNX1/LRP1/LRRTM2/RAB5A/EPS15/AP2A2/GRK3/FLOT1/USP46/AP1S1/DNM2	68										R-HSA-1236975	Antigen processing-Cross presentation	25/1351	98/10704	0.000373083	0.00245945	0.00157469	CALR/UBA52/UBB/B2M/HLA-B/HLA-A/CYBA/UBC/PDIA3/PSMB4/CTSS/LNPEP/STX4/RPS27A/SEC61A2/PSMA4/PSME1/PSMD10/PSMD4/PSMD3/PSMB7/PSMB10/PSMF1/PSMD13/TAPBP	25
TTC9B	1.39454e-278	0.288813	0.839	0.681	3.06995e-274	1.39454e-276	GO:0055067	monovalent inorganic cation homeostasis	41/2012	159/18866	5.56701e-08	1.60717e-06	1.19295e-06	MAPK1/ATP6V0C/ATP1A3/ATP1B1/ATP1B2/ATP6AP1/ATP6V1H/ATP1A2/ATP6V1B2/EDNRB/ATP6V1G2/CLIC4/RAB7A/MAPK3/ATP6AP2/ATP6V1A/CLCN3/ATP6V0E2/ATP6V0A1/ATP6V0B/ATP6V1C1/ATP6V1E1/SLC4A3/ATP6V0D1/TMEM165/GRN/CA2/ATP6V1F/CHP1/SLC9A6/SLC12A5/ADORA1/ROGDI/ATP6V1D/PPT1/NEDD4L/DMXL2/CCKBR/MAFG/COMT/SLC12A2	41										R-HSA-2871837	FCERI mediated NF-kB activation	22/1351	82/10704	0.000387069	0.00253932	0.00162583	UBA52/UBB/FCER1G/UBC/SKP1/CDC34/RASGRP1/BTRC/PSMB4/UBE2N/RPS27A/PSMA4/PSME1/PSMD10/FBXW11/PSMD4/PSMD3/PSMB7/PSMB10/PSMF1/PSMD13/UBE2D2	22
RPS18	6.54056e-277	0.229468	0.996	0.992	1.43984e-272	6.54056e-275	GO:0001933	negative regulation of protein phosphorylation	85/2012	444/18866	5.63457e-08	1.61886e-06	1.20162e-06	HSPB1/DBNDD2/SNCA/THY1/CALM3/DNAJA1/SH3GL2/UCHL1/APOE/YWHAG/CALM1/CALM2/PRNP/DDIT4/SEMA4D/SIRT2/SPRED1/PRKAR1A/MAPK8IP1/RACK1/SIRPA/SRCIN1/PTPRR/PAFAH1B1/RGS14/PHB/CAMK2N1/WNK1/RASSF2/PPP2CA/HMGCR/PRKCD/ARRB2/PKIA/CHORDC1/IPO7/CHP1/EIF4G1/PRKCZ/PTEN/DTNBP1/GMFB/PEBP1/SH3BP5/RGS4/DMTN/TERF2IP/DLG1/PRKAR1B/PPP2R1A/PIK3R2/GBA/GSKIP/ADAR/CDKN1C/PIN1/GNAQ/CRKL/JUN/PSEN1/CADM4/CEBPA/SMPD1/PID1/DVL1/PRK…	85										R-HSA-448424	Interleukin-17 signaling	20/1351	72/10704	0.000429494	0.00278697	0.00178439	MAPK1/MAP2K1/UBA52/UBB/PPP2CB/ELK1/MAPK3/UBC/PPP2CA/SKP1/BTRC/PPP2R1A/UBE2N/JUN/RPS27A/RPS6KA2/DUSP7/MAPK14/MAP2K4/FBXW11	20
NORAD	3.01715e-273	0.224173	0.996	0.99	6.64195e-269	3.01715e-271	GO:0031102	neuron projection regeneration	22/2012	59/18866	6.57061e-08	1.87875e-06	1.39454e-06	SPP1/APOD/THY1/MAP2K1/MAG/RTN4R/GAP43/NEFL/JAM3/MAPK8IP3/MATN2/TNR/TSPO/GRN/RTN4RL2/PTEN/JUN/CERS2/LRP1/PTPRF/FKBP1B/OMG	22										R-HSA-8964043	Plasma lipoprotein clearance	12/1351	33/10704	0.000430158	0.00278697	0.00178439	APOC1/APOE/AP2M1/LIPA/CLTC/CLTA/NPC2/AP2S1/AP2B1/HDLBP/NCEH1/AP2A2	12
SLC8A2	3.43472e-273	0.286434	0.744	0.533	7.56119e-269	3.43472e-271	GO:1903364	positive regulation of cellular protein catabolic process	39/2012	149/18866	7.55849e-08	2.15093e-06	1.59657e-06	NUPR1/HSP90AA1/HSPA1A/DNAJB2/APOE/ABCA2/SIRT2/CD81/CLU/RACK1/DDRGK1/UQCC2/PTK2/ATP5IF1/BCAP31/TREM2/PTEN/HSPA1B/PLK2/ZER1/GBA/USP5/FBXW7/PSEN1/CEBPA/RBX1/RDX/DVL1/HSPBP1/DDA1/LRP1/FBXL5/PSMD10/SGTA/MDM2/KEAP1/HERPUD1/CSNK1E/TMEM259	39										R-HSA-5140745	WNT5A-dependent internalization of FZD2, FZD5 and ROR2	7/1351	13/10704	0.000430975	0.00278697	0.00178439	AP2M1/CLTC/CLTA/AP2S1/AP2B1/CLTB/AP2A2	7
MEG3	4.01531e-272	0.238185	0.998	0.992	8.83931e-268	4.01531e-270	GO:0090084	negative regulation of inclusion body assembly	9/2012	11/18866	7.90156e-08	2.2379e-06	1.66112e-06	HSPA1A/DNAJB2/DNAJA4/DNAJB1/HSPA2/HSPA1B/HSF1/DNAJB6/SACS	9										R-HSA-190828	Gap junction trafficking	15/1351	47/10704	0.000442354	0.00283357	0.00181422	TUBA1A/TUBA1B/TUBB4A/TUBB2A/ACTB/AP2M1/GJA1/DNM1/TUBB3/CLTC/CLTA/TUBA4A/CLTB/DNM2/TUBB2B	15
SNX3	1.34275e-271	0.271998	0.931	0.87	2.95593e-267	1.34275e-269	GO:0006826	iron ion transport	26/2012	79/18866	8.38728e-08	2.36426e-06	1.75492e-06	TF/FTL/FTH1/ATP6V0C/B2M/ATP6AP1/ATP6V1H/ATP6V1B2/ATP6V1G2/ATP6V1A/CLTC/ATP6V0E2/ATP6V0A1/ATP6V0B/ATP6V1C1/ATP6V1E1/ATP6V0D1/ATP6V1F/NECTIN1/SLC22A17/ATP6V1D/ARHGAP1/ABCB6/PGRMC2/SFXN1/DNM2	26										R-HSA-9020591	Interleukin-12 signaling	15/1351	47/10704	0.000442354	0.00283357	0.00181422	SOD2/MIF/SOD1/CFL1/ARF1/PPIA/RPLP0/HNRNPA2B1/CDC42/HSPA9/CAPZA1/TCP1/P4HB/AIP/HNRNPDL	15
CLSTN1	7.21114e-270	0.219761	1	0.992	1.58746e-265	7.21114e-268	GO:0007626	locomotory behavior	47/2012	198/18866	9.6847e-08	2.71717e-06	2.01687e-06	CNP/HIPK2/CNTN2/SNCG/APP/GNAO1/UCHL1/APOE/SOD1/PSAP/ABCA2/PPP3CB/ATP1A2/GPR37/ADGRL3/PAFAH1B1/SELENOP/ARRB2/TNR/LRRTM1/APBA1/PTEN/NLGN2/EFNB3/GMFB/MYO5A/CHL1/FEZF2/CHRNB2/OLFM2/SEZ6L/BTBD9/PPT1/CSTB/GRIN1/CALB1/ADCY5/GRM5/GLRB/ETV5/WDR47/NEGR1/PRKCE/SLC25A46/APBA2/PUM1/HPRT1	47										R-HSA-180534	Vpu mediated degradation of CD4	16/1351	52/10704	0.00045786	0.00291912	0.001869	UBA52/UBB/UBC/SKP1/BTRC/PSMB4/RPS27A/PSMA4/PSME1/PSMD10/PSMD4/PSMD3/PSMB7/PSMB10/PSMF1/PSMD13	16
THRA	2.97939e-269	0.250795	0.942	0.871	6.55882e-265	2.97939e-267	GO:0031113	regulation of microtubule polymerization	20/2012	51/18866	9.73728e-08	2.71916e-06	2.01834e-06	HSPA1A/SNCA/STMN1/TUBB4A/MAP2/STMN2/PAK1/DCTN1/MAPRE3/MAPT/CDK5R1/RPS3/RAC1/ARL2/CLIP3/HSPA1B/FKBP4/PSRC1/DYRK1A/CLASP1	20										R-HSA-447115	Interleukin-12 family signaling	17/1351	57/10704	0.000462154	0.00293274	0.00187772	SOD2/CANX/MIF/SOD1/CFL1/ARF1/PPIA/RPLP0/HNRNPA2B1/CDC42/HSPA9/CAPZA1/TCP1/P4HB/STAT1/AIP/HNRNPDL	17
KIAA0930	4.60687e-269	0.265921	0.899	0.789	1.01416e-264	4.60687e-267	GO:0048814	regulation of dendrite morphogenesis	29/2012	95/18866	9.94411e-08	2.764e-06	2.05163e-06	YWHAH/CFL1/NSMF/SEMA4D/KIF1A/CDK5R1/SRCIN1/DBNL/PAFAH1B1/OPA1/RAB21/BAIAP2/PAK3/PTEN/CHRNB2/NLGN3/ABI2/GRIN1/NEDD4L/CAMK2B/CDKL5/ADGRB3/PTPRD/CDK5/TANC2/ACTR2/PPFIA2/RAP2A/ADAM10	29										R-HSA-1236974	ER-Phagosome pathway	22/1351	83/10704	0.000465032	0.00293727	0.00188062	CALR/UBA52/UBB/B2M/HLA-B/HLA-A/UBC/PDIA3/PSMB4/STX4/RPS27A/SEC61A2/PSMA4/PSME1/PSMD10/PSMD4/PSMD3/PSMB7/PSMB10/PSMF1/PSMD13/TAPBP	22
RPL28	2.01156e-268	0.19872	0.999	0.999	4.42825e-264	2.01156e-266	GO:0035304	regulation of protein dephosphorylation	37/2012	139/18866	1.01292e-07	2.8024e-06	2.08013e-06	PPP1R14A/HSP90B1/HSP90AB1/CALM3/ARPP19/YWHAB/CALM1/YWHAE/CALM2/NSMF/FKBP1A/PPP2R2C/PHACTR3/ENSA/PTPA/PRKCD/ELFN2/SET/SLC39A10/PPP6R1/PPP2R1A/SPPL3/GBA/ADORA1/PIN1/SMPD1/PPP1R16B/PPP4R4/B3GAT3/PPP1R10/CABIN1/PPP1R11/DUSP26/FKBP1B/PPP1R37/PPP2R5C/PPP2R2B	37										R-HSA-983169	Class I MHC mediated antigen processing & presentation	69/1351	370/10704	0.000476258	0.00299425	0.0019171	CALR/CANX/UBA52/UBB/B2M/FBXL16/HLA-B/RNF130/HSPA5/HLA-A/CYBA/UBC/BCAP31/PJA2/PDIA3/SKP1/CDC34/UBA1/BTRC/UBE2E2/ELOB/PSMB4/CTSS/LNPEP/FBXW7/TRIM36/UBE2R2/STX4/UBE2N/NEDD4L/RPS27A/UBE2Z/FBXO41/UBE2Q1/SEC61A2/UBE2K/RBX1/RLIM/TRIP12/UBE2W/UBE2B/ZNRF1/PSMA4/PSME1/KBTBD6/UBE4A/WSB1/FBXL5/FBXO11/FBXO44/PSMD10/FBXW4/FBXL3/LMO7/FBXW11/PSMD4/KEAP1/BTBD1/CUL3/SAR1B/PSMD3/PSMB7/UBE2L6/PSMB10/PSMF1/RNF220/PSM…	69
SYN1	5.28689e-268	0.23783	0.994	0.975	1.16386e-263	5.28689e-266	GO:1903320	regulation of protein modification by small protein conjugation or removal	54/2012	242/18866	1.02169e-07	2.81364e-06	2.08848e-06	HSP90AA1/HSPA1A/HSP90AB1/PRKCG/DNAJA1/DNAJB2/RPS2/UBB/NDFIP1/SEPTIN4/FKBP1A/TOLLIP/HSPA5/RPL5/RPL11/RPL23/RPS3/CAPN3/FAM107A/SKP1/ARRB2/TSPO/IVNS1ABP/BTRC/CHP1/PTEN/HSPA1B/ZMIZ1/CTNNB1/SQSTM1/FBXW7/PIN1/PEF1/UBE2N/PSEN1/DYSF/RBX1/TRIP12/DERL1/HSPBP1/OTUB1/CDK5/UBA2/PRKCE/PSMD10/HDAC4/ISG15/CDK5RAP3/UBE2I/HERPUD1/CUL3/RAB1A/UBXN1/NDFIP2	54										R-HSA-913531	Interferon Signaling	42/1351	199/10704	0.000483566	0.00302619	0.00193755	CAMK2D/NCAM1/HLA-DRA/UBA52/UBB/B2M/EIF4A2/HLA-B/TRIM2/HLA-A/EIF4G2/CD44/MAPK3/UBC/PRKCD/BST2/HLA-DPB1/HLA-DRB1/IFITM3/EIF4G1/TRIM8/HLA-DPA1/IFNGR1/FLNA/IFI6/ADAR/PIN1/UBE2N/IP6K2/RPS27A/SAMHD1/CAMK2B/KPNA4/STAT1/ISG15/SEH1L/STAT2/UBE2L6/EIF4E/PPM1B/EIF4E3/KPNB1	42
SLC30A3	1.26032e-267	0.286433	0.462	0.226	2.77446e-263	1.26032e-265	GO:0017156	calcium-ion regulated exocytosis	23/2012	65/18866	1.0276e-07	2.81695e-06	2.09093e-06	SYN2/BAIAP3/SYT1/STX1A/ARF1/ATP2A2/PPP3CB/VAMP2/STXBP1/SYT5/SYT17/CHP1/DOC2A/CDK5R2/SYT4/CACNA1I/RAPGEF4/CADPS/STXBP3/SCAMP5/SYT7/CDK5/RAB3GAP1	23										R-HSA-5205647	Mitophagy	11/1351	29/10704	0.000489453	0.00303505	0.00194322	UBA52/UBB/MAP1LC3A/UBC/VDAC1/SQSTM1/TOMM70/RPS27A/TOMM22/TOMM20/CSNK2A1	11
RPLP1	7.22497e-267	0.19225	1	0.999	1.59051e-262	7.22497e-265	GO:0030041	actin filament polymerization	46/2012	193/18866	1.16112e-07	3.16842e-06	2.35181e-06	TMSB4X/TMSB10/BIN1/AIF1/ARF1/CORO1A/SPTBN1/MTPN/COBL/ARPC5/PFN1/CYFIP2/CAPZB/RAC1/DBNL/GAS7/SPTAN1/FAM107A/PRKCD/BAG4/ARPC4/EVL/PREX1/BAIAP2/PAK3/GRB2/ARPC3/GMFB/DMTN/CAPZA1/ACTR3B/DLG1/ABI2/ACTR3/ARPC1B/NCKAP1/HCLS1/CDC42EP1/RDX/BRK1/RHOA/CAPG/PRKCE/HAX1/ACTR2/ARPC1A	46										R-HSA-5654732	Negative regulation of FGFR3 signaling	11/1351	29/10704	0.000489453	0.00303505	0.00194322	MAPK1/UBA52/UBB/PPP2CB/MAPK3/FGF1/UBC/PPP2CA/GRB2/PPP2R1A/RPS27A	11
GPM6B	4.68284e-266	0.225957	0.999	0.991	1.03088e-261	4.68284e-264	GO:1902473	regulation of protein localization to synapse	14/2012	27/18866	1.22924e-07	3.33906e-06	2.47848e-06	CNIH2/TYROBP/MAPT/NPTN/HRAS/PRKCZ/STX7/NLGN2/DLG1/IQSEC2/CLSTN3/DVL1/ADAM10/RAP1A	14										R-HSA-74752	Signaling by Insulin receptor	21/1351	78/10704	0.000494829	0.00305444	0.00195564	MAPK1/ATP6V0C/ATP6AP1/ATP6V1H/ATP6V1B2/ATP6V1G2/MAPK3/ATP6V1A/HRAS/FGF1/ATP6V0E2/ATP6V0A1/ATP6V0B/ATP6V1C1/ATP6V1E1/ATP6V0D1/ATP6V1F/GRB2/PIK3R2/ATP6V1D/FGFR2	21
RPL39	3.7621e-265	0.240064	0.985	0.973	8.2819e-261	3.7621e-263	GO:0045732	positive regulation of protein catabolic process	51/2012	225/18866	1.35994e-07	3.67738e-06	2.7296e-06	NUPR1/HSP90AA1/HSPA1A/DNAJB2/NSF/APOE/OAZ1/ABCA2/NDFIP1/GJA1/SIRT2/CD81/CLU/RACK1/DDRGK1/RAB7A/UQCC2/PTK2/ATP5IF1/BCAP31/NRDC/TREM2/PTEN/HSPA1B/PLK2/ZER1/GBA/USP5/FBXW7/NEDD4L/PSEN1/CEBPA/RBX1/RDX/DVL1/HSPBP1/EGLN2/DDA1/SNX1/LRP1/ATG4B/FBXL5/APC2/PSMD10/SGTA/MDM2/CSNK2A1/KEAP1/HERPUD1/CSNK1E/TMEM259	51										R-HSA-1483257	Phospholipid metabolism	44/1351	212/10704	0.000523982	0.00321976	0.00206149	PIP4K2A/CPNE6/SLC44A1/PLD3/ARF1/PLAAT4/MBOAT7/ARF3/PIP4K2B/AGPAT1/PLAAT3/PI4KA/CPNE7/SYNJ2/PTEN/PTDSS1/AGPAT4/PITPNB/PIK3R2/HADHB/PIP5K1C/GNPAT/SYNJ1/CDS2/PLEKHA2/PLA2G4C/SELENOI/GDE1/GPD2/VAC14/INPP4A/CPNE3/MBOAT2/RAB5A/CSNK2A1/RAB4A/MTMR6/OSBPL8/MIGA1/SACM1L/LPGAT1/SBF1/PNPLA6/CDIPT	44
PGM2L1	6.36696e-263	0.284207	0.806	0.649	1.40162e-258	6.36696e-261	GO:0016241	regulation of macroautophagy	43/2012	176/18866	1.41461e-07	3.80798e-06	2.82654e-06	NUPR1/PIP4K2A/UCHL1/ATP6V0C/GAPDH/SCOC/ATP6V1H/ATP6V1B2/FEZ1/ATP6V1G2/CDK5R1/PIP4K2B/MAPK3/ATP6V1A/ATP6V0E2/CAPNS1/ATP6V0A1/ATP6V0B/ATP6V1C1/ATP6V1E1/ATP6V0D1/LARP1/BNIP3/GBA/ATP6V1D/SPTLC2/TBC1D14/PRKAG2/HSPB8/QSOX1/EXOC7/LAMTOR2/CDK5/NRBP2/RAB5A/RAB3GAP1/SNX6/LAMTOR4/SMG1/SUPT5H/RNF5/BNIP3L/WAC	43										R-HSA-390450	Folding of actin by CCT/TriC	6/1351	10/10704	0.000533768	0.00326055	0.0020876	ACTB/CCT5/TCP1/CCT2/CCT7/CCT3	6
DYNLL1	8.91697e-263	0.207979	0.999	0.996	1.96298e-258	8.91697e-261	GO:0015800	acidic amino acid transport	24/2012	71/18866	1.47896e-07	3.96335e-06	2.94187e-06	SLC17A7/SYT1/STX1A/GJA1/ARL6IP1/SLC25A22/ATP1A2/GLS/VAMP2/STXBP1/PRAF2/ARL6IP5/APBA1/SYT4/ADORA1/PSEN1/TSPOAP1/NF1/HRH3/PPFIA2/RAB3GAP1/LRRC8D/PPFIA3/SLC12A2	24										R-HSA-400685	Sema4D in semaphorin signaling	10/1351	25/10704	0.000537823	0.00326055	0.0020876	MYL6/SEMA4D/RAC1/PLXNB1/RHOA/ARHGAP35/MYL12B/MYL9/RHOC/MYH9	10
RPL29	8.94618e-263	0.228019	0.99	0.978	1.96941e-258	8.94618e-261	GO:0070841	inclusion body assembly	13/2012	24/18866	1.7855e-07	4.76346e-06	3.53576e-06	HSPA1A/DNAJB2/PSAP/DNAJA4/CLU/MAPT/DNAJB1/CDC34/HSPA2/HSPA1B/HSF1/DNAJB6/SACS	13										R-HSA-983170	Antigen Presentation: Folding, assembly and peptide loading of class I MHC	10/1351	25/10704	0.000537823	0.00326055	0.0020876	CALR/CANX/B2M/HLA-B/HSPA5/HLA-A/BCAP31/PDIA3/SAR1B/TAPBP	10
BCAS1	4.96869e-262	0.382745	0.573	0.339	1.09381e-257	4.96869e-260	GO:0030308	negative regulation of cell growth	45/2012	190/18866	1.92946e-07	5.12464e-06	3.80385e-06	CRYAB/SPP1/HSPA1A/DNAJB2/RTN4/MAG/MEG3/MAP2/APBB1/GJA1/SEMA3D/PAK1/RTN4R/SEMA4D/ENO1/SLIT3/RACK1/CDK5R1/CCDC85B/PHB/DACT3/ADIPOR1/PPP2CA/BST2/TNR/SEMA4F/SEMA4A/SEMA3E/HSPA1B/RGS4/PPP2R1A/SPART/BCL11A/ADIPOR2/SEMA6B/PSRC1/IFRD1/YY1/PPT1/IP6K2/EI24/PTPRJ/CDK5/BMPR2/ACVR1B	45										R-HSA-164938	Nef-mediates down modulation of cell surface receptors by recruiting them to clathrin adapters	9/1351	21/10704	0.000560111	0.00338058	0.00216445	B2M/ARF1/AP2M1/ATP6V1H/HLA-A/AP2S1/AP2B1/AP2A2/AP1S1	9
CCDC92	7.31885e-262	0.256118	0.891	0.764	1.61117e-257	7.31885e-260	GO:0035967	cellular response to topologically incorrect protein	41/2012	166/18866	1.99786e-07	5.28283e-06	3.92127e-06	HSPA1A/HSP90B1/CALR/RHBDD2/CANX/HSPD1/PDIA6/DCTN1/BOK/HSPA5/RACK1/DDRGK1/HSPA8/ATP6V0D1/ATF4/HSPA2/AUP1/HSPA1B/HYOU1/HSPA9/MYDGF/SDF2L1/HSF1/TMBIM6/TPP1/TMEM33/UBE2W/DERL1/HSPB8/PREB/EXTL3/SRPRA/SSR1/CDK5RAP3/VAPB/TLN1/HERPUD1/CUL3/HDGF/CTDSP2/RNF5	41										R-HSA-2122947	NOTCH1 Intracellular Domain Regulates Transcription	15/1351	48/10704	0.000569408	0.00342149	0.00219064	UBA52/UBB/UBC/SKP1/KAT2A/HDAC11/TBL1XR1/FBXW7/RBPJ/RPS27A/HDAC5/NCOR2/RBX1/HDAC4/HDAC2	15
SREBF2	9.15491e-262	0.257547	0.867	0.749	2.01536e-257	9.15491e-260	GO:0090383	phagosome acidification	14/2012	28/18866	2.21681e-07	5.83596e-06	4.33184e-06	ATP6V0C/ATP6V1H/ATP6V1B2/ATP6V1G2/RAB7A/ATP6V1A/ATP6V0E2/ATP6V0A1/ATP6V0B/ATP6V1C1/ATP6V1E1/ATP6V0D1/ATP6V1F/ATP6V1D	14										R-HSA-5654727	Negative regulation of FGFR2 signaling	12/1351	34/10704	0.000589289	0.00350989	0.00224724	MAPK1/UBA52/UBB/PPP2CB/MAPK3/FGF1/UBC/PPP2CA/GRB2/PPP2R1A/RPS27A/FGFR2	12
LINGO1	6.93246e-261	0.282355	0.795	0.632	1.52611e-256	6.93246e-259	GO:0047496	vesicle transport along microtubule	19/2012	49/18866	2.5081e-07	6.57387e-06	4.87957e-06	MAP2/CNIH2/KIF1A/KIF1B/PAFAH1B1/AP3S1/KIF1C/RASGRP1/PRKCZ/DTNBP1/DYNC1H1/AP3B2/AP3M2/KIFAP3/DYNC1I1/TRAK2/FBXW11/KIF5B/RAB1A	19										R-HSA-936440	Negative regulators of DDX58/IFIH1 signaling	12/1351	34/10704	0.000589289	0.00350989	0.00224724	UBA52/UBB/UBC/PCBP2/PIN1/OTUD5/RPS27A/UBE2K/ISG15/CYLD/UBE2L6/UBE2D2	12
DDIT4	8.01014e-261	0.287554	0.539	0.298	1.76335e-256	8.01014e-259	GO:0071277	cellular response to calcium ion	26/2012	83/18866	2.55185e-07	6.65933e-06	4.943e-06	CPNE6/CAMK2D/SYT1/HPCA/CACYBP/NEUROD2/HSPA5/CLIC4/CAPN3/CPNE7/SYT5/SYT17/JUND/RASAL1/DMTN/SYT4/ITPKB/ADCY1/JUN/SLC25A23/LGMN/ALOX5AP/NCSTN/CPNE5/CPNE3/SYT7	26										R-HSA-6806834	Signaling by MET	21/1351	79/10704	0.000595299	0.0035302	0.00226025	SH3GL2/UBA52/UBB/RAC1/PTK2/HRAS/SH3GL3/UBC/GRB2/SPINT2/CRKL/HGS/RPS27A/RANBP9/PTPRJ/CRK/EPS15/RAB4B/SH3KBP1/RAB4A/RAP1A	21
HPCA	3.72976e-260	0.277754	0.847	0.717	8.2107e-256	3.72976e-258	GO:1905477	positive regulation of protein localization to membrane	34/2012	127/18866	2.84081e-07	7.38117e-06	5.4788e-06	ATP2B4/YWHAZ/YWHAH/YWHAB/YWHAG/YWHAE/PRNP/HPCA/YWHAQ/NECAB2/SPTBN1/ITGB2/PAK1/CD81/RACK1/CDK5R1/HRAS/CLIP3/TREM2/ANK3/PDCD5/CHP1/AP2B1/DLG1/SQSTM1/STX4/RHOG/AKAP5/LRP1/PPP3R1/CDK5/PRKCE/NMT1/KIF5B	34										R-HSA-9658195	Leishmania infection	50/1351	252/10704	0.000677604	0.00400081	0.00256156	C3/MAPK1/HSP90AB1/CALM3/APP/CALM1/ACTB/CALM2/GNG2/GNAZ/ARPC5/PRKAR1A/TXN/CYFIP2/RAC1/CYBA/MAPK3/PTK2/SUGT1/ARPC4/GNG7/PRKACB/FCGR3A/GNG3/BAIAP2/CDC42/GNB1/GRB2/ARPC3/MYO5A/GNAI1/PLK2/PRKAR1B/ABI2/ACTR3/ARPC1B/NCKAP1/ADCY1/JUN/ADCY5/CD163/BRK1/DVL1/ELMO2/CRK/ACTR2/MAPK14/ELMO1/ARPC1A/MYH9	50
MT-ND5	3.58248e-259	0.212642	1	1	7.88648e-255	3.58248e-257	GO:0034765	regulation of ion transmembrane transport	89/2012	489/18866	2.95154e-07	7.63567e-06	5.66771e-06	SCN3B/SNCA/ATP2B4/YWHAH/THY1/TMSB4X/FXYD6/CALM3/CAMK2D/APP/CALM1/YWHAE/CALM2/ANK2/BIN1/PRNP/GRIA1/APLNR/ARF1/CACNA1E/HPCA/CORO1A/YWHAQ/ATP1B1/CNIH2/ATP1B2/CX3CL1/CD63/ARL6IP1/KCNG1/FKBP1A/ATP1A2/CACNG3/VAMP2/NEFL/CLIC4/KCNQ2/CYBA/KCNAB2/CACNA2D1/CAPN3/WNK1/ARL6IP5/SHISA9/GRIN2B/STIM1/HSPA2/TREM2/ANK3/KCNJ9/GRIA2/CHP1/PTEN/NLGN2/WDR1/MYO5A/DLG2/RGS4/SCN2B/DLG1/CTSS/NLGN3/CACNB1/FLNA/CACNA1I/JPH4/K…	89										R-HSA-109581	Apoptosis	38/1351	178/10704	0.000699122	0.00410999	0.00263146	YWHAZ/YWHAH/MAPK1/YWHAB/UBA52/YWHAG/YWHAE/UBB/SEPTIN4/DYNLL1/YWHAQ/MAPT/DBNL/MAPK3/PTK2/DYNLL2/UBC/BCAP31/OPA1/SPTAN1/PRKCD/PSMB4/CTNNB1/RPS27A/PSMA4/PSME1/PPP3R1/NMT1/PSMD10/BCL2L1/PSMD4/PSMD3/PSMB7/PSMB10/PSMF1/PSMD13/KPNB1/VIM	38
HSPD1	1.44343e-257	0.282104	0.8	0.663	3.17757e-253	1.44343e-255	GO:0048259	regulation of receptor-mediated endocytosis	30/2012	105/18866	3.04866e-07	7.85293e-06	5.82897e-06	TF/C3/APOC1/SH3GL2/DNAJC6/ABCA2/B2M/ARF1/HPCA/NECAB2/HNRNPK/CD63/SNAP91/CLU/LRPAP1/APOC2/RAC1/SH3GL3/RAB21/ARRB2/LRRTM1/VEGFA/PICALM/APLN/PPT1/SGIP1/LRRTM2/FLOT1/USP46/DNM2	30										R-HSA-5676590	NIK-->noncanonical NF-kB signaling	17/1351	59/10704	0.000718185	0.00420386	0.00269156	UBA52/UBB/UBC/SKP1/BTRC/PSMB4/RPS27A/PSMA4/PSME1/PSMD10/FBXW11/PSMD4/PSMD3/PSMB7/PSMB10/PSMF1/PSMD13	17
CORO1A	8.28682e-256	0.271786	0.53	0.289	1.82426e-251	8.28682e-254	GO:0048268	clathrin coat assembly	11/2012	18/18866	3.08414e-07	7.91022e-06	5.8715e-06	NSG2/SNAP91/CLTC/CLTA/CALY/AP2S1/PICALM/AP2B1/CLTB/SGIP1/EPS15	11										R-HSA-157858	Gap junction trafficking and regulation	15/1351	49/10704	0.000726288	0.00421484	0.00269859	TUBA1A/TUBA1B/TUBB4A/TUBB2A/ACTB/AP2M1/GJA1/DNM1/TUBB3/CLTC/CLTA/TUBA4A/CLTB/DNM2/TUBB2B	15
YWHAQ	4.57482e-255	0.256222	0.952	0.89	1.0071e-250	4.57482e-253	GO:0097061	dendritic spine organization	26/2012	84/18866	3.32374e-07	8.48833e-06	6.30061e-06	APOE/CFL1/PRNP/ARF1/KIF1A/CTNND2/CDK5R1/SRCIN1/DBNL/PAFAH1B1/OPA1/GRIN2B/BAIAP2/CDC42/PAK3/PTEN/NLGN3/ABI2/LGMN/DVL1/CAMK2B/CDK5/TANC2/ACTR2/PPFIA2/ADAM10	26										R-HSA-180585	Vif-mediated degradation of APOBEC3G	16/1351	54/10704	0.000729371	0.00421484	0.00269859	UBA52/UBB/UBC/ELOB/PSMB4/RPS27A/RBX1/PSMA4/PSME1/PSMD10/PSMD4/PSMD3/PSMB7/PSMB10/PSMF1/PSMD13	16
PPIA	1.16436e-254	0.187609	1	1	2.56321e-250	1.16436e-252	GO:0048169	regulation of long-term neuronal synaptic plasticity	13/2012	25/18866	3.35576e-07	8.53363e-06	6.33424e-06	SYP/APP/SYNGR1/SYNPO/NPTN/HRAS/NEURL1/GRIN1/GRM5/CAMK2B/NF1/SYNGAP1/RAB5A	13										R-HSA-8854050	FBXL7 down-regulates AURKA during mitotic entry and in early mitosis	16/1351	54/10704	0.000729371	0.00421484	0.00269859	UBA52/UBB/UBC/SKP1/PSMB4/RPS27A/RBX1/PSMA4/PSME1/PSMD10/PSMD4/PSMD3/PSMB7/PSMB10/PSMF1/PSMD13	16
SHTN1	8.84412e-254	0.3084	0.664	0.442	1.94694e-249	8.84412e-252	GO:0032252	secretory granule localization	10/2012	15/18866	3.37545e-07	8.54732e-06	6.3444e-06	MAP2/KIF1A/KIF1B/KIF1C/RASGRP1/MYO5A/SYT4/TANC2/PPFIA2/KIF5B	10										R-HSA-2467813	Separation of Sister Chromatids	40/1351	191/10704	0.000765084	0.00438394	0.00280686	TUBA1A/TUBA1B/TUBB4A/TUBB2A/UBA52/UBB/DYNLL1/XPO1/PPP2CB/TUBB3/PAFAH1B1/DYNLL2/UBC/PPP2CA/RANGAP1/DYNC1LI2/CLASP2/TAOK1/DYNC1H1/NUDC/PSMB4/PPP1CC/PPP2R1A/TUBA4A/RPS27A/DYNC1I1/CLASP1/PSMA4/PSME1/PSMD10/SEH1L/PSMD4/PSMD3/PSMB7/ANAPC16/PPP2R5C/PSMB10/PSMF1/PSMD13/TUBB2B	40
CACYBP	1.71475e-252	0.26692	0.846	0.726	3.77485e-248	1.71475e-250	GO:0051084	'de novo' posttranslational protein folding	16/2012	37/18866	3.80142e-07	9.58535e-06	7.11489e-06	CD74/HSPA1A/HSPH1/PTGES3/HSPE1/HSPA5/DNAJB1/HSPA8/HSPA2/HSPA1B/HSPA9/ST13/DNAJB4/DNAJC7/SELENOF/CCT2	16										R-HSA-169893	Prolonged ERK activation events	7/1351	14/10704	0.000768319	0.00438394	0.00280686	MAPK1/MAP2K1/YWHAB/MAPK3/CRKL/CRK/RAP1A	7
HNRNPC	5.9258e-251	0.253365	0.915	0.839	1.30451e-246	5.9258e-249	GO:0120032	regulation of plasma membrane bounded cell projection assembly	43/2012	183/18866	4.51338e-07	1.13328e-05	8.41194e-06	ANLN/GPM6A/DPYSL3/MAP4/COBL/FSCN1/GAP43/PFN1/RAP1GAP/CAPZB/RAC1/HRAS/KCTD17/PRKCD/EVL/FXR1/CDC42/RIPOR2/PALM/CCP110/DMTN/SEPTIN7/ACTR3/MIEN1/NEURL1/FAM98A/NCKAP1/RHOG/CDC42EP1/ARAP1/SEPTIN9/PPP1R16B/RDX/BRK1/EVI5L/CDKL5/ARHGAP35/RAB5A/ACTR2/HDAC4/CYLD/ATMIN/DNM2	43										R-HSA-442720	CREB1 phosphorylation through the activation of Adenylate Cyclase	7/1351	14/10704	0.000768319	0.00438394	0.00280686	CALM3/CALM1/CALM2/PRKAR1A/PRKACB/PRKAR1B/ADCY1	7
EEF1A1	9.6693e-250	0.156354	1	1	2.1286e-245	9.6693e-248	GO:2001242	regulation of intrinsic apoptotic signaling pathway	40/2012	166/18866	5.60989e-07	1.40271e-05	1.04118e-05	HSPB1/CD74/NUPR1/SOD2/HSPA1A/DNAJA1/TPT1/MIF/UBB/SOD1/SEPTIN4/HNRNPK/BOK/RPL11/ENO1/CLU/MAPK8IP1/RACK1/RPS3/CD44/SERINC3/ERP29/BCAP31/OPA1/IVNS1ABP/HYOU1/S100A8/BCL2L2/SFPQ/FBXW7/TMBIM6/ARHGEF2/S100A9/PARP1/RPL26/P4HB/BCL2L1/MDM2/HERPUD1/CYLD	40										R-HSA-174824	Plasma lipoprotein assembly, remodeling, and clearance	19/1351	70/10704	0.000809215	0.00457881	0.00293163	APOC1/APOE/AP2M1/APOC2/LIPA/CLTC/CLTA/NPC2/PRKACB/PLTP/AP2S1/AP2B1/PCSK6/HDLBP/NCEH1/P4HB/AP2A2/SAR1B/A2M	19
RPLP0	2.99813e-249	0.262404	0.943	0.883	6.60009e-245	2.99813e-247	GO:0060074	synapse maturation	13/2012	26/18866	6.05511e-07	1.50772e-05	1.11913e-05	YWHAZ/CLSTN1/NEUROD2/NEFL/PFN1/BCAN/PTEN/PALM/SEZ6L/NEURL1/NFIA/CAMK2B/IGSF21	13										R-HSA-400253	Circadian Clock	19/1351	70/10704	0.000809215	0.00457881	0.00293163	UBA52/UBB/UBC/DBP/SKP1/SMARCD3/BTRC/RBM4/PPP1CA/BHLHE41/PPP1CC/TBL1XR1/NR1D1/PPP1CB/RPS27A/SREBF1/MEF2D/FBXL3/CSNK1E	19
SCOC	1.04451e-248	0.261921	0.873	0.749	2.29939e-244	1.04451e-246	GO:0060491	regulation of cell projection assembly	43/2012	185/18866	6.19211e-07	1.52909e-05	1.135e-05	ANLN/GPM6A/DPYSL3/MAP4/COBL/FSCN1/GAP43/PFN1/RAP1GAP/CAPZB/RAC1/HRAS/KCTD17/PRKCD/EVL/FXR1/CDC42/RIPOR2/PALM/CCP110/DMTN/SEPTIN7/ACTR3/MIEN1/NEURL1/FAM98A/NCKAP1/RHOG/CDC42EP1/ARAP1/SEPTIN9/PPP1R16B/RDX/BRK1/EVI5L/CDKL5/ARHGAP35/RAB5A/ACTR2/HDAC4/CYLD/ATMIN/DNM2	43										R-HSA-198753	ERK/MAPK targets	9/1351	22/10704	0.000842565	0.00470866	0.00301477	MAPK1/PPP2CB/ELK1/MAPK3/PPP2CA/PPP2R1A/RPS6KA2/DUSP7/MAPK14	9
ATP1B1	1.31227e-248	0.209264	1	0.994	2.88883e-244	1.31227e-246	GO:2001257	regulation of cation channel activity	43/2012	185/18866	6.19211e-07	1.52909e-05	1.135e-05	TMSB4X/CALM3/CAMK2D/APP/CALM1/CALM2/ANK2/GRIA1/HPCA/CNIH2/KCNG1/FKBP1A/CACNG3/VAMP2/NEFL/CACNA2D1/SHISA9/GRIN2B/STIM1/TREM2/ANK3/GRIA2/NLGN2/MYO5A/DLG2/DLG1/CTSS/NLGN3/CACNB1/JPH4/GRIA3/GRIN1/LRRC7/DYSF/SHISA7/EHD3/CDK5/KCNIP2/ANTKMT/AKAP6/KIF5B/FKBP1B/MINK1	43										R-HSA-2979096	NOTCH2 Activation and Transmission of Signal to the Nucleus	9/1351	22/10704	0.000842565	0.00470866	0.00301477	UBA52/UBB/CNTN1/UBC/NEURL1/RPS27A/PSEN1/NCSTN/ADAM10	9
AP2M1	1.8724e-248	0.214255	0.996	0.981	4.12189e-244	1.8724e-246	GO:0051051	negative regulation of transport	87/2012	483/18866	6.3259e-07	1.5557e-05	1.15475e-05	CRYAB/PEA15/CD74/HSPA1A/APOC1/APOD/SNCA/CALM3/CAMK2D/APOE/OAZ1/CALM1/YWHAE/CALM2/BIN1/ABCA2/NDFIP1/GDI1/SNX3/GPM6B/SREBF2/CORO1A/YWHAQ/NECAB2/GJA1/MAOB/CNIH2/ATP1A2/BOK/RACK1/SIRPA/PTGER3/TXN/LRPAP1/APOC2/RAB7A/SRCIN1/RAC1/CD22/SH3GL3/ABR/PXK/ERP29/WNK1/PACSIN1/ARL6IP5/ERBB3/ATF4/HMGCR/BST2/BAG4/PKIA/RANGAP1/LRRTM1/ANK3/PICALM/CHP1/PTEN/RAB11FIP3/RGS4/DMTN/SYT4/CD47/ADORA1/STK39/NEDD4L/UFM1/ARHGA…	87										R-HSA-389977	Post-chaperonin tubulin folding pathway	9/1351	22/10704	0.000842565	0.00470866	0.00301477	TUBA1A/TUBA1B/TUBB4A/TUBB2A/TUBB3/TBCB/ARL2/TUBA4A/TUBB2B	9
RPL37A	2.24773e-248	0.175177	1	1	4.94815e-244	2.24773e-246	GO:0042982	amyloid precursor protein metabolic process	23/2012	71/18866	6.36038e-07	1.55777e-05	1.15628e-05	APP/APOE/BIN1/ABCA2/PRNP/NECAB2/FKBP1A/CLU/KLK6/ITM2C/BACE1/DHCR24/ITM2B/PICALM/IFNGR1/DLG1/PIN1/DYRK1A/PSEN1/SLC2A13/NCSTN/ADAM10/FLOT2	23										R-HSA-190840	Microtubule-dependent trafficking of connexons from Golgi to the plasma membrane	8/1351	18/10704	0.000854973	0.00475841	0.00304662	TUBA1A/TUBA1B/TUBB4A/TUBB2A/GJA1/TUBB3/TUBA4A/TUBB2B	8
MAP2	5.62178e-248	0.208688	0.998	0.989	1.23758e-243	5.62178e-246	GO:0070050	neuron cellular homeostasis	15/2012	34/18866	6.42331e-07	1.56676e-05	1.16296e-05	SLC17A7/DNAJB2/SLC8A2/CX3CL1/DCTN1/NCS1/NELL2/TAOK1/TYRO3/ADORA1/CALB1/TSPOAP1/ATP2B3/ATP2B1/CDK5	15										R-HSA-5607761	Dectin-1 mediated noncanonical NF-kB signaling	17/1351	60/10704	0.000886289	0.00491257	0.00314533	UBA52/UBB/UBC/SKP1/BTRC/PSMB4/RPS27A/PSMA4/PSME1/PSMD10/FBXW11/PSMD4/PSMD3/PSMB7/PSMB10/PSMF1/PSMD13	17
FCER1G	3.33786e-247	0.273528	0.382	0.163	7.34797e-243	3.33786e-245	GO:0031396	regulation of protein ubiquitination	47/2012	211/18866	7.0885e-07	1.72199e-05	1.27818e-05	HSP90AA1/HSPA1A/HSP90AB1/PRKCG/DNAJA1/DNAJB2/RPS2/UBB/NDFIP1/SEPTIN4/FKBP1A/HSPA5/RPL5/RPL11/RPL23/RPS3/FAM107A/SKP1/ARRB2/TSPO/IVNS1ABP/BTRC/CHP1/PTEN/HSPA1B/SQSTM1/FBXW7/PIN1/PEF1/UBE2N/PSEN1/DYSF/RBX1/TRIP12/DERL1/HSPBP1/OTUB1/CDK5/PRKCE/PSMD10/ISG15/CDK5RAP3/HERPUD1/CUL3/RAB1A/UBXN1/NDFIP2	47										R-HSA-174113	SCF-beta-TrCP mediated degradation of Emi1	16/1351	55/10704	0.000910066	0.00500352	0.00320356	UBA52/UBB/UBC/SKP1/BTRC/PSMB4/RPS27A/PSMA4/PSME1/PSMD10/PSMD4/PSMD3/PSMB7/PSMB10/PSMF1/PSMD13	16
MGST1	1.03668e-246	0.334927	0.779	0.677	2.28215e-242	1.03668e-244	GO:0051453	regulation of intracellular pH	26/2012	87/18866	7.12117e-07	1.72292e-05	1.27887e-05	ATP6V0C/ATP6V1H/ATP6V1B2/ATP6V1G2/CLIC4/RAB7A/ATP6AP2/ATP6V1A/CLCN3/ATP6V0E2/ATP6V0A1/ATP6V0B/ATP6V1C1/ATP6V1E1/SLC4A3/ATP6V0D1/TMEM165/GRN/CA2/ATP6V1F/CHP1/SLC9A6/ROGDI/ATP6V1D/PPT1/DMXL2	26										R-HSA-4641257	Degradation of AXIN	16/1351	55/10704	0.000910066	0.00500352	0.00320356	UBA52/UBB/UBC/PSMB4/RPS27A/PSMA4/PSME1/TNKS2/PSMD10/PSMD4/PSMD3/PSMB7/RNF146/PSMB10/PSMF1/PSMD13	16
STMN2	4.95615e-246	0.259582	0.974	0.93	1.09105e-241	4.95615e-244	GO:0043488	regulation of mRNA stability	43/2012	186/18866	7.23517e-07	1.74344e-05	1.2941e-05	HSPB1/HSPA1A/YWHAZ/YWHAB/UBA52/UBB/HNRNPC/XPO1/YBX1/UBC/HSPA8/PRKCD/FXR1/SET/DHX9/EIF4G1/LARP1/PSMB4/RBM10/ANP32A/RPS27A/PABPC1/PCBP4/PABPC4/PSMA4/PSME1/HNRNPU/TARDBP/SAMD4B/PSMD10/MAPK14/PSMD4/YTHDF3/YTHDF2/PUM1/PSMD3/PSMB7/PSMB10/PSMF1/MYEF2/PSMD13/ALKBH5/VIM	43										R-HSA-177929	Signaling by EGFR	15/1351	50/10704	0.000918382	0.00502888	0.0032198	SH3GL2/UBA52/UBB/HRAS/SH3GL3/UBC/CDC42/GRB2/HGS/RPS27A/EPN1/EPS15/ADAM10/SH3KBP1/PTPRK	15
RUNDC3A	5.12694e-246	0.246516	0.963	0.909	1.12865e-241	5.12694e-244	GO:0031103	axon regeneration	19/2012	52/18866	7.41608e-07	1.77986e-05	1.32113e-05	SPP1/APOD/MAP2K1/MAG/RTN4R/GAP43/NEFL/JAM3/MAPK8IP3/TNR/TSPO/GRN/RTN4RL2/PTEN/JUN/CERS2/LRP1/PTPRF/FKBP1B	19										R-HSA-2122948	Activated NOTCH1 Transmits Signal to the Nucleus	11/1351	31/10704	0.00094287	0.00510127	0.00326614	UBA52/UBB/CNTN1/UBC/ARRB2/NEURL1/RPS27A/PSEN1/NCSTN/DNER/ADAM10	11
DNAJA4	6.78277e-246	0.29407	0.71	0.537	1.49316e-241	6.78277e-244	GO:0030833	regulation of actin filament polymerization	41/2012	174/18866	7.65734e-07	1.83041e-05	1.35865e-05	TMSB4X/TMSB10/BIN1/ARF1/CORO1A/SPTBN1/MTPN/ARPC5/PFN1/CYFIP2/CAPZB/DBNL/SPTAN1/PRKCD/BAG4/ARPC4/EVL/PREX1/BAIAP2/PAK3/GRB2/ARPC3/GMFB/DMTN/CAPZA1/ACTR3B/DLG1/ABI2/ACTR3/ARPC1B/NCKAP1/HCLS1/CDC42EP1/RDX/BRK1/RHOA/CAPG/PRKCE/HAX1/ACTR2/ARPC1A	41										R-HSA-445095	Interaction between L1 and Ankyrins	11/1351	31/10704	0.00094287	0.00510127	0.00326614	SCN3B/ACTB/ANK2/SPTBN1/NRCAM/NFASC/KCNQ2/SPTAN1/ANK3/SCN2B/L1CAM	11
MEIS3	1.37134e-245	0.264247	0.452	0.223	3.01886e-241	1.37134e-243	GO:0017158	regulation of calcium ion-dependent exocytosis	17/2012	43/18866	7.74767e-07	1.84463e-05	1.36921e-05	BAIAP3/SYT1/STX1A/ARF1/ATP2A2/STXBP1/SYT5/SYT17/DOC2A/CDK5R2/SYT4/CACNA1I/STXBP3/SCAMP5/SYT7/CDK5/RAB3GAP1	17										R-HSA-5654733	Negative regulation of FGFR4 signaling	11/1351	31/10704	0.00094287	0.00510127	0.00326614	MAPK1/UBA52/UBB/PPP2CB/MAPK3/FGF1/UBC/PPP2CA/GRB2/PPP2R1A/RPS27A	11
TTYH2	3.10843e-245	0.323728	0.456	0.234	6.84289e-241	3.10843e-243	GO:0046785	microtubule polymerization	24/2012	77/18866	8.0946e-07	1.91958e-05	1.42484e-05	HSPA1A/SNCA/STMN1/TUBB4A/TPPP/MAP2/STMN2/PAK1/DCTN1/MAPRE3/MAPT/CDK5R1/RPS3/RAC1/ARL2/CLIP3/CLASP2/HSPA1B/FKBP4/PSRC1/DYRK1A/CLASP1/RANBP9/TPPP3	24										R-HSA-1234176	Oxygen-dependent proline hydroxylation of Hypoxia-inducible Factor Alpha	18/1351	66/10704	0.00103517	0.00557843	0.00357165	UBA52/UBB/UBC/ELOB/PSMB4/RPS27A/RBX1/EGLN2/PSMA4/PSME1/PSMD10/PSMD4/PSMD3/PSMB7/PSMB10/PSMF1/PSMD13/UBE2D2	18
NECAB2	8.12395e-245	0.285504	0.569	0.334	1.78841e-240	8.12395e-243	GO:0043270	positive regulation of ion transport	58/2012	284/18866	8.33335e-07	1.96838e-05	1.46107e-05	SCN3B/SNCA/THY1/TMSB4X/FABP3/CALM3/APOE/SYT1/CALM1/MIF/CALM2/ANK2/APLNR/ARF1/CNTN1/ATP1B1/ATP1B2/CX3CL1/ARL6IP1/ATP8A1/DBI/CACNG3/STXBP1/RAB3B/CACNA2D1/CAPN3/WNK1/CHRM1/ATP8A2/ATF4/PRKCD/ARRB2/TSPO/STIM1/HSPA2/TREM2/ANK3/CHP1/CHRNB2/SYT4/DLG1/CTSS/NLGN3/FLNA/ADORA1/GRIN1/STK39/PSEN1/EHD3/ATP2B1/CDK5/KCNIP2/RAB3GAP1/ANTKMT/AKAP6/KIF5B/SLC12A2/DNM2	58										R-HSA-5625970	RHO GTPases activate KTN1	6/1351	11/10704	0.00104902	0.00563071	0.00360512	RAC1/KLC1/CDC42/RHOG/RHOA/KIF5B	6
AQP4	1.39456e-244	0.219114	0.986	0.947	3.06998e-240	1.39456e-242	GO:0060997	dendritic spine morphogenesis	21/2012	62/18866	8.45326e-07	1.98885e-05	1.47626e-05	CFL1/KIF1A/CTNND2/CDK5R1/SRCIN1/DBNL/PAFAH1B1/OPA1/BAIAP2/CDC42/PAK3/PTEN/NLGN3/ABI2/DVL1/CAMK2B/CDK5/TANC2/ACTR2/PPFIA2/ADAM10	21										R-HSA-5678895	Defective CFTR causes cystic fibrosis	17/1351	61/10704	0.00108679	0.00581049	0.00372023	UBA52/UBB/UBC/SEL1L/PSMB4/RPS27A/DERL1/PSMA4/PSME1/PSMD10/PSMD4/PSMD3/PSMB7/PSMB10/PSMF1/RNF5/PSMD13	17
SPOCK1	3.14872e-244	0.262279	0.915	0.826	6.93159e-240	3.14872e-242	GO:0010921	regulation of phosphatase activity	41/2012	175/18866	8.98437e-07	2.10245e-05	1.56058e-05	PPP1R14A/HSP90B1/HSP90AB1/CALM3/ARPP19/CALM1/CALM2/FKBP1A/SEMA4D/SPRED1/PPP2R2C/PHACTR3/ARFGEF3/ENSA/PTPA/WNK1/FARP1/BAG4/ELFN2/SET/SLC39A10/PPP6R1/CHP1/DLG2/PPP2R1A/SYTL2/SLC7A14/PPP1R16B/PPP4R4/B3GAT3/PPP1R10/CABIN1/PPP1R11/CD2BP2/RIMBP2/RBM26/CDK5RAP3/FKBP1B/PPP1R37/PPP2R5C/PPP2R2B	41										R-HSA-418346	Platelet homeostasis	22/1351	88/10704	0.00109504	0.00583164	0.00373377	ATP2B4/CALM3/CALM1/CALM2/GNG2/SLC8A2/ATP2A2/KCNMB4/PPP2CB/PDE2A/PDE1A/PPP2CA/GNG7/STIM1/GNG3/GNB1/GUCY1B1/PPP2R1A/ATP2B3/ATP2B1/MAPK14/PPP2R5C	22
CAMKV	4.30125e-244	0.254671	0.899	0.802	9.46878e-240	4.30125e-242	GO:0016601	Rac protein signal transduction	16/2012	39/18866	9.04165e-07	2.10245e-05	1.56058e-05	STMN3/AIF1/RAC1/DBNL/CDH13/RHOU/ABI2/NCKAP1/RHOG/CADM4/NISCH/BRK1/NF1/CRK/ELMO1/DNM2	16										R-HSA-112310	Neurotransmitter release cycle	15/1351	51/10704	0.00115172	0.00610953	0.00391169	SLC17A7/SYN2/SYT1/STX1A/SYN1/GLS/VAMP2/STXBP1/ARL6IP5/HSPA8/APBA1/DNAJC5/TSPOAP1/PPFIA2/PPFIA3	15
ICAM5	7.3518e-242	0.277263	0.603	0.373	1.61843e-237	7.3518e-240	GO:0031111	negative regulation of microtubule polymerization or depolymerization	16/2012	39/18866	9.04165e-07	2.10245e-05	1.56058e-05	SNCA/STMN1/TUBB4A/MAP2/STMN2/CLIP3/CLASP2/TAOK1/MID1IP1/MAP6D1/BMERB1/FKBP4/DYRK1A/ARHGEF2/CLASP1/APC2	16										R-HSA-380320	Recruitment of NuMA to mitotic centrosomes	23/1351	94/10704	0.0011698	0.00617266	0.00395211	TUBA1A/HSP90AA1/TUBA1B/TUBB4A/TUBB/TUBB2A/YWHAG/YWHAE/DYNLL1/DCTN1/TUBB3/PAFAH1B1/MZT2A/CCP110/SSNA1/DYNC1H1/PPP2R1A/TUBA4A/ACTR1A/MZT2B/CLASP1/CSNK1E/TUBB2B	23
RPL7A	2.07831e-241	0.205622	0.994	0.986	4.57519e-237	2.07831e-239	GO:0042177	negative regulation of protein catabolic process	34/2012	133/18866	9.1601e-07	2.12174e-05	1.57489e-05	SNCA/HIPK2/HSP90AB1/TIMP2/PRKCG/SNX3/RPL5/SIRT2/RPL11/RPL23/DDRGK1/MGAT3/PHB/AGAP2/HMGCR/TIMP1/AZIN1/USP14/FLNA/CTSA/PIN1/PSEN1/DYSF/RYBP/CYP51A1/USP7/SGTA/CDK5RAP3/CSNK2A1/ALAD/SVIP/PSMF1/UBXN1/WAC	34										R-HSA-1169408	ISG15 antiviral mechanism	19/1351	72/10704	0.00117271	0.00617266	0.00395211	UBA52/UBB/EIF4A2/EIF4G2/MAPK3/UBC/EIF4G1/PIN1/UBE2N/RPS27A/KPNA4/STAT1/ISG15/SEH1L/UBE2L6/EIF4E/PPM1B/EIF4E3/KPNB1	19
SPTBN1	2.65526e-241	0.215487	0.99	0.976	5.84529e-237	2.65526e-239	GO:0061001	regulation of dendritic spine morphogenesis	18/2012	48/18866	9.27947e-07	2.14108e-05	1.58926e-05	CFL1/KIF1A/CDK5R1/SRCIN1/DBNL/PAFAH1B1/OPA1/BAIAP2/PAK3/PTEN/NLGN3/ABI2/CAMK2B/CDK5/TANC2/ACTR2/PPFIA2/ADAM10	18										R-HSA-111447	Activation of BAD and translocation to mitochondria	7/1351	15/10704	0.00128445	0.00673468	0.00431195	YWHAZ/YWHAH/YWHAB/YWHAG/YWHAE/YWHAQ/PPP3R1	7
APBB1	4.74608e-239	0.22046	0.985	0.958	1.0448e-234	4.74608e-237	GO:0051098	regulation of binding	70/2012	367/18866	9.4788e-07	2.17866e-05	1.61715e-05	HIPK2/TMSB4X/HSP90AB1/CALM3/STMN1/APP/DNAJB2/APOE/ACTB/B2M/S100A10/MAP2/ATP2A2/FKBP1A/PPP2CB/MAPRE3/SIRT2/RPL11/RACK1/DDRGK1/TXN/LRPAP1/EDF1/MAPK3/CAMK1/PPP2CA/PRKCD/ARRB2/SMARCD3/CDC42/RIPOR2/DHX9/RAN/EIF4G1/TLE5/DTNBP1/PCBD1/PPP1CA/PLK2/CTNNB1/SPPL3/FBXW7/PLXND1/PIN1/TAF10/JUN/PSEN1/HDAC5/HSF1/TMBIM6/LDOC1/DVL1/NUCKS1/PARP1/DERL1/LARP6/LRP1/AKTIP/CRK/CDK5/EIF3E/SUMO3/HDAC4/FLOT1/PTPRF/HDAC2/BTB…	70										R-HSA-422356	Regulation of insulin secretion	20/1351	78/10704	0.00129693	0.00677397	0.0043371	STX1A/GNG2/CACNA1E/VAMP2/PRKAR1A/STXBP1/MARCKS/SYT5/GNG7/PRKACB/GNG3/ACSL4/GNB1/GNAI1/PRKAR1B/GNAQ/ADCY5/RAPGEF4/AKAP5/RAP1A	20
SPRYD3	6.47644e-239	0.250433	0.892	0.797	1.42572e-234	6.47644e-237	GO:0043087	regulation of GTPase activity	86/2012	481/18866	1.0079e-06	2.30775e-05	1.71297e-05	MAP4K4/THY1/STMN3/MAPRE2/SOD1/S100A10/GDI1/PKP4/CX3CL1/ARHGDIA/RTN4R/SEMA4D/AGAP1/RACK1/RAP1GAP/ARHGDIG/AGAP3/PAFAH1B1/ARL2/PTK2/CHN1/RGS14/AGAP2/HRAS/ABR/WNK1/ADAP1/EIF5/GIT1/ARRB2/DOCK9/ARHGDIB/RTKN/PLXNB1/PREX1/RANGAP1/RASGRP1/PICALM/RAP1GAP2/ARHGAP23/DOCK5/CPEB2/RASAL1/ARHGAP21/RGS4/IQSEC1/TMED2/PLXND1/PIN1/GNAQ/CRKL/RABGAP1/JUN/TBC1D9B/RHOG/RABEP1/ZC3H15/ARHGAP1/RAP1GDS1/ARAP1/DOCK4/PTPRN2/T…	86										R-HSA-190872	Transport of connexons to the plasma membrane	8/1351	19/10704	0.00131465	0.00681409	0.00436279	TUBA1A/TUBA1B/TUBB4A/TUBB2A/GJA1/TUBB3/TUBA4A/TUBB2B	8
SUN2	8.72659e-238	0.329361	0.812	0.695	1.92107e-233	8.72659e-236	GO:0006469	negative regulation of protein kinase activity	52/2012	246/18866	1.02977e-06	2.34882e-05	1.74345e-05	HSPB1/DBNDD2/SNCA/THY1/DNAJA1/UCHL1/APOE/YWHAG/SPRED1/PRKAR1A/MAPK8IP1/RACK1/SRCIN1/RGS14/CAMK2N1/WNK1/PPP2CA/HMGCR/PRKCD/PKIA/CHORDC1/IPO7/CHP1/PTEN/DTNBP1/GMFB/SH3BP5/RGS4/PRKAR1B/PPP2R1A/GBA/GSKIP/ADAR/CDKN1C/GNAQ/PSEN1/CEBPA/SMPD1/DVL1/PRKAG2/NF1/GSTP1/DUSP22/DUSP7/PTPRJ/RTRAF/DUSP26/SNX6/CDK5RAP3/HEXIM1/PTPRT/IPO5	52										R-HSA-8876725	Protein methylation	8/1351	19/10704	0.00131465	0.00681409	0.00436279	CALM3/RPS2/CALM1/CALM2/EEF1A1/HSPA8/EEF2/ETFB	8
HNRNPK	1.08061e-237	0.237019	0.953	0.899	2.37886e-233	1.08061e-235	GO:0010959	regulation of metal ion transport	74/2012	396/18866	1.05321e-06	2.39315e-05	1.77636e-05	TF/SCN3B/SNCA/ATP2B4/YWHAH/THY1/FXYD6/CALM3/CAMK2D/CALM1/YWHAE/CALM2/ANK2/BIN1/SARAF/B2M/PRNP/APLNR/ARF1/CNTN1/HPCA/CORO1A/ATP1B1/GJA1/ATP1B2/CX3CL1/CD63/KCNG1/FKBP1A/ATP1A2/NKAIN2/VAMP2/CYBA/KCNAB2/CACNA2D1/CAPN3/WNK1/ATF4/ARRB2/NKAIN4/TSPO/STIM1/HSPA2/TREM2/ANK3/CHP1/PTEN/MYO5A/RGS4/SCN2B/DLG1/CTNNB1/CACNB1/FLNA/JPH4/ADORA1/KCNIP3/GRIN1/STK39/NEDD4L/DYSF/TMBIM6/RHOA/CAMK2B/EHD3/DPP6/ATP2B1/CDK5…	74										R-HSA-1483255	PI Metabolism	21/1351	84/10704	0.00140683	0.00726419	0.00465097	PIP4K2A/ARF1/ARF3/PIP4K2B/PI4KA/SYNJ2/PTEN/PITPNB/PIK3R2/PIP5K1C/SYNJ1/PLEKHA2/GDE1/VAC14/INPP4A/RAB5A/RAB4A/MTMR6/SACM1L/SBF1/PNPLA6	21
NDUFS5	2.21919e-237	0.221189	0.98	0.954	4.88533e-233	2.21919e-235	GO:0014013	regulation of gliogenesis	33/2012	128/18866	1.07297e-06	2.42353e-05	1.7989e-05	CNTN2/NKX6-2/BIN1/MAG/ID4/ATP1B2/CX3CL1/DAAM2/SOX10/SIRT2/OPALIN/OLIG2/PTPRZ1/CHRM1/ZNF488/SOX8/TSPO/IL34/TREM2/WDR1/BMERB1/CTNNB1/PPP1CC/NR1D1/CRKL/TENM4/ETV5/CERS2/NF1/RNF10/LRP1/HDAC2/CDH2	33										R-HSA-5621481	C-type lectin receptors (CLRs)	31/1351	142/10704	0.00143079	0.00735988	0.00471224	CALM3/UBA52/CALM1/UBB/CALM2/FCER1G/PPP3CB/PAK1/HRAS/UBC/SKP1/PRKCD/PRKACB/CDC34/BTRC/PAK3/PSMB4/UBE2N/RPS27A/PSMA4/PSME1/PPP3R1/PSMD10/FBXW11/PSMD4/PSMD3/PSMB7/PSMB10/PSMF1/PSMD13/UBE2D2	31
EFHD1	3.3777e-237	0.329193	0.578	0.353	7.43566e-233	3.3777e-235	GO:0021799	cerebral cortex radially oriented cell migration	14/2012	31/18866	1.07469e-06	2.42353e-05	1.7989e-05	RTN4/SUN2/MBOAT7/ADGRG1/CDK5R1/PAFAH1B1/CDK5R2/DIXDC1/ZMIZ1/BMERB1/CTNNB1/SRGAP2/POU3F2/CDK5	14										R-HSA-6814122	Cooperation of PDCL (PhLP1) and TRiC/CCT in G-protein beta folding	13/1351	42/10704	0.0014437	0.0073983	0.00473684	GNAO1/GNG2/GNAZ/GNG7/GNG3/GNB1/CCT5/GNAI1/TCP1/CCT2/CSNK2A1/CCT7/CCT3	13
RNASE1	8.68126e-236	0.332441	0.594	0.38	1.91109e-231	8.68126e-234	GO:0001764	neuron migration	39/2012	164/18866	1.10393e-06	2.48011e-05	1.84091e-05	CNTN2/TUBB2A/GPM6A/YWHAE/DDIT4/SHTN1/SPOCK1/CX3CL1/NSMF/ADGRG1/ADGRL3/CDK5R1/NRCAM/RAC1/PAFAH1B1/PTK2/MATN2/VEGFA/CHL1/CDK5R2/FEZF2/ZMIZ1/CTNNB1/FLNA/USP9X/CRKL/DCLK1/PSEN1/ARHGEF2/CAMK2B/CELSR2/SRGAP2/CDKL5/DNER/CRK/CDK5/NDN/NAV1/TUBB2B	39										R-HSA-68882	Mitotic Anaphase	46/1351	236/10704	0.00159626	0.00814935	0.00521771	TUBA1A/TUBA1B/TUBB4A/TUBB2A/UBA52/UBB/DYNLL1/XPO1/PPP2CB/SIRT2/TUBB3/PAFAH1B1/DYNLL2/UBC/PPP2CA/RANGAP1/DYNC1LI2/CLASP2/TAOK1/RAN/DYNC1H1/NUDC/PSMB4/PPP1CC/PPP2R1A/TUBA4A/RPS27A/DYNC1I1/CLASP1/PSMA4/PSME1/BANF1/PSMD10/SEH1L/IST1/PSMD4/UBE2I/PSMD3/PSMB7/ANAPC16/PPP2R5C/PSMB10/PSMF1/PSMD13/KPNB1/TUBB2B	46
GJA1	1.00904e-235	0.235879	0.986	0.937	2.22129e-231	1.00904e-233	GO:0021885	forebrain cell migration	20/2012	58/18866	1.11123e-06	2.48717e-05	1.84614e-05	CNTN2/RTN4/SUN2/MBOAT7/ADGRG1/CDK5R1/PAFAH1B1/TNR/CDK5R2/TYRO3/FEZF2/DIXDC1/ZMIZ1/BMERB1/CTNNB1/PSEN1/RHOA/SRGAP2/POU3F2/CDK5	20										R-HSA-168142	Toll Like Receptor 10 (TLR10) Cascade	21/1351	85/10704	0.00165095	0.00833455	0.00533628	MAPK1/MAP2K1/APP/UBA52/UBB/PPP2CB/ELK1/MAPK3/UBC/PPP2CA/SKP1/BTRC/PPP2R1A/UBE2N/JUN/RPS27A/RPS6KA2/DUSP7/MAPK14/MAP2K4/FBXW11	21
MAOB	1.4082e-235	0.277483	0.651	0.441	3.10001e-231	1.4082e-233	GO:0035305	negative regulation of dephosphorylation	30/2012	111/18866	1.12299e-06	2.50409e-05	1.8587e-05	PPP1R14A/ARPP19/YWHAB/YWHAE/FKBP1A/SEMA4D/SPRED1/PHACTR3/ARFGEF3/ENSA/PTPA/WNK1/FARP1/BAG4/ELFN2/SET/CHP1/DLG2/SYTL2/SLC7A14/PPP1R16B/PPP4R4/PPP1R10/CABIN1/PPP1R11/CD2BP2/RIMBP2/RBM26/FKBP1B/PPP1R37	30										R-HSA-168176	Toll Like Receptor 5 (TLR5) Cascade	21/1351	85/10704	0.00165095	0.00833455	0.00533628	MAPK1/MAP2K1/APP/UBA52/UBB/PPP2CB/ELK1/MAPK3/UBC/PPP2CA/SKP1/BTRC/PPP2R1A/UBE2N/JUN/RPS27A/RPS6KA2/DUSP7/MAPK14/MAP2K4/FBXW11	21
AQP1	3.53463e-235	0.253167	0.339	0.131	7.78112e-231	3.53463e-233	GO:0034620	cellular response to unfolded protein	36/2012	146/18866	1.13089e-06	2.51233e-05	1.86482e-05	HSPA1A/HSP90B1/CALR/RHBDD2/CANX/HSPD1/PDIA6/DCTN1/BOK/HSPA5/RACK1/DDRGK1/HSPA8/ATP6V0D1/ATF4/HSPA2/HSPA1B/HYOU1/HSPA9/MYDGF/HSF1/TMBIM6/TPP1/TMEM33/DERL1/HSPB8/PREB/EXTL3/SRPRA/SSR1/CDK5RAP3/VAPB/TLN1/HERPUD1/HDGF/CTDSP2	36										R-HSA-975871	MyD88 cascade initiated on plasma membrane	21/1351	85/10704	0.00165095	0.00833455	0.00533628	MAPK1/MAP2K1/APP/UBA52/UBB/PPP2CB/ELK1/MAPK3/UBC/PPP2CA/SKP1/BTRC/PPP2R1A/UBE2N/JUN/RPS27A/RPS6KA2/DUSP7/MAPK14/MAP2K4/FBXW11	21
PGBD5	5.67695e-235	0.271116	0.686	0.484	1.24972e-230	5.67695e-233	GO:0048489	synaptic vesicle transport	17/2012	44/18866	1.13751e-06	2.51768e-05	1.86879e-05	ARF1/MAP2/CNIH2/DNM1/SNAP91/AP3S1/KIF5C/PICALM/DTNBP1/CTNNB1/TMEM230/AP3B2/AP3M2/SYNJ1/CDK5/KIF5B/DNM2	17										R-HSA-5654726	Negative regulation of FGFR1 signaling	11/1351	33/10704	0.00169739	0.00853723	0.00546605	MAPK1/UBA52/UBB/PPP2CB/MAPK3/FGF1/UBC/PPP2CA/GRB2/PPP2R1A/RPS27A	11
FAU	2.83808e-234	0.207907	0.993	0.988	6.24776e-230	2.83808e-232	GO:1901653	cellular response to peptide	74/2012	398/18866	1.28172e-06	2.8264e-05	2.09794e-05	APP/ATP6V0C/YWHAG/ATP1A3/PRNP/GJA1/ATP6AP1/ATP6V1H/PKM/PAK1/ATP6V1B2/VAMP2/PRKAR1A/RPL23/ATP6V1G2/CYBA/PTK2/ATP6V1A/CACNA2D1/AP3S1/BACE1/ATP6V0E2/ATP6V0A1/ATP6V0B/ATP6V1C1/ADIPOR1/ATP6V1E1/OPA1/ATP6V0D1/PRKCD/PRKACB/BCAR1/PTPRA/RANGAP1/TREM2/CA2/BAIAP2/ATP6V1F/PRKCZ/PTEN/GRB2/MYO5A/CPEB2/BCL2L2/PRKAR1B/CACNB1/PIK3R2/RAB8B/ATP6V1D/ADCY1/ADCY5/GRM5/PSEN1/LGMN/HDAC5/HSF1/PID1/ARHGEF2/LDOC1/NUCKS1/PA…	74										R-HSA-2555396	Mitotic Metaphase and Anaphase	46/1351	237/10704	0.00174497	0.00874418	0.00559855	TUBA1A/TUBA1B/TUBB4A/TUBB2A/UBA52/UBB/DYNLL1/XPO1/PPP2CB/SIRT2/TUBB3/PAFAH1B1/DYNLL2/UBC/PPP2CA/RANGAP1/DYNC1LI2/CLASP2/TAOK1/RAN/DYNC1H1/NUDC/PSMB4/PPP1CC/PPP2R1A/TUBA4A/RPS27A/DYNC1I1/CLASP1/PSMA4/PSME1/BANF1/PSMD10/SEH1L/IST1/PSMD4/UBE2I/PSMD3/PSMB7/ANAPC16/PPP2R5C/PSMB10/PSMF1/PSMD13/KPNB1/TUBB2B	46
CNIH2	1.79095e-232	0.262258	0.759	0.58	3.94261e-228	1.79095e-230	GO:0030900	forebrain development	73/2012	391/18866	1.28689e-06	2.82738e-05	2.09867e-05	CNP/ATP2B4/NPY/CNTN2/APP/YWHAE/UBB/RTN4/SLIT1/B2M/LPAR1/ID4/SUN2/AQP1/ATP1B2/MBOAT7/ATP1A2/TYROBP/RTN4R/ADGRG1/ARPC5/NEFL/KIF1A/FEZ1/OLIG2/CDK5R1/PAFAH1B1/DNAJB1/NUMBL/PGAP1/CSF1R/NEUROD6/SSTR1/TNR/KAT2A/SSTR2/BCAN/RTN4RL2/PTEN/ZEB2/CDK5R2/TYRO3/FEZF2/DIXDC1/ZMIZ1/CHRNB2/BMERB1/CTNNB1/BNIP3/FLNA/CRKL/RBPJ/DCLK1/GRIN1/PSEN1/NFIB/WDR47/RHOA/NF1/SRGAP2/FGFR2/DCLK2/TACC1/LRP1/CRK/POU3F2/ARHGAP35/CDK5…	73										R-HSA-169911	Regulation of Apoptosis	15/1351	53/10704	0.00176967	0.00883535	0.00565692	UBA52/UBB/UBC/OPA1/PSMB4/RPS27A/PSMA4/PSME1/PSMD10/PSMD4/PSMD3/PSMB7/PSMB10/PSMF1/PSMD13	15
CERCAM	3.91163e-232	0.31069	0.413	0.2	8.61105e-228	3.91163e-230	GO:0018198	peptidyl-cysteine modification	18/2012	49/18866	1.32112e-06	2.89195e-05	2.1466e-05	ATP2B4/GAPDH/TXN/RAB3B/CLIP3/GOLGA7B/ZDHHC9/ZDHHC23/GOLGA7/S100A8/MAP6D1/RAB6A/ZDHHC14/NCOA7/S100A9/ZDHHC20/ADH5/ZDHHC22	18										R-HSA-8948751	Regulation of PTEN stability and activity	18/1351	69/10704	0.00180108	0.00895923	0.00573624	UBA52/UBB/UBC/PTEN/PSMB4/RPS27A/PSMA4/PSME1/TNKS2/PSMD10/CSNK2A1/PSMD4/PSMD3/PSMB7/RNF146/PSMB10/PSMF1/PSMD13	18
EEF1B2	5.07289e-232	0.26233	0.864	0.766	1.11675e-227	5.07289e-230	GO:0008090	retrograde axonal transport	11/2012	20/18866	1.32803e-06	2.89647e-05	2.14996e-05	SOD1/NEFL/KIF1A/KIF1B/PAFAH1B1/KIF1C/DLG2/DYNC1H1/DST/FBXW11/KIF5B	11										R-HSA-1169410	Antiviral mechanism by IFN-stimulated genes	20/1351	80/10704	0.0018087	0.00896429	0.00573948	UBA52/UBB/EIF4A2/EIF4G2/MAPK3/UBC/EIF4G1/FLNA/PIN1/UBE2N/RPS27A/KPNA4/STAT1/ISG15/SEH1L/UBE2L6/EIF4E/PPM1B/EIF4E3/KPNB1	20
ATP2A2	5.22349e-232	0.230501	0.962	0.905	1.1499e-227	5.22349e-230	GO:0051592	response to calcium ion	36/2012	147/18866	1.34591e-06	2.92478e-05	2.17097e-05	CPNE6/CALM3/CAMK2D/SYT1/CALM1/CALM2/GDI1/HPCA/CACYBP/KCNMB4/NEUROD2/HSPA5/CLIC4/CAPN3/CPNE7/SYT5/STIM1/SYT17/JUND/ANXA11/RASAL1/DMTN/SYT4/ITPKB/PEF1/ADCY1/JUN/SLC25A23/LGMN/ALOX5AP/NCSTN/CPNE5/CPNE3/SYT7/KCNIP2/ENTPD6	36										R-HSA-170968	Frs2-mediated activation	6/1351	12/10704	0.00187483	0.00922471	0.00590621	MAPK1/MAP2K1/YWHAB/MAPK3/CRKL/RAP1A	6
EIF1	9.04309e-232	0.183188	1	0.998	1.99075e-227	9.04309e-230	GO:1900034	regulation of cellular response to heat	24/2012	79/18866	1.35935e-06	2.9433e-05	2.18471e-05	CRYAB/HSP90AA1/HSPA1A/MAPK1/HSP90AB1/HSPH1/CAMK2D/PTGES3/YWHAE/MAPT/MAPK3/DNAJB1/HSPA8/BAG4/CHORDC1/HSBP1/HSPA1B/FKBP4/DNAJC7/HSF1/DNAJB6/CAMK2B/HSPB8/SEH1L	24										R-HSA-8866427	VLDLR internalisation and degradation	6/1351	12/10704	0.00187483	0.00922471	0.00590621	AP2M1/CLTC/CLTA/AP2S1/AP2B1/AP2A2	6
MTPN	5.6541e-231	0.240631	0.931	0.839	1.24469e-226	5.6541e-229	GO:0046822	regulation of nucleocytoplasmic transport	30/2012	112/18866	1.37903e-06	2.97513e-05	2.20834e-05	APOD/MAPK1/HSP90AB1/YWHAE/XPO1/UHMK1/TXN/CAMK1/PRKCD/PKIA/RANGAP1/DHX9/CHP1/RAN/RBM4/ANP32B/PPP1CC/FLNA/PIK3R2/HCLS1/PSEN1/NUTF2/UFM1/NF1/TARDBP/CDK5/RBM26/MDM2/MAPK14/IPO5	30										R-HSA-9020702	Interleukin-1 signaling	24/1351	103/10704	0.00190009	0.00931527	0.0059642	MAP2K1/APP/UBA52/UBB/TOLLIP/UBC/SKP1/BTRC/PSMB4/SQSTM1/UBE2N/RPS27A/RBX1/PSMA4/PSME1/PSMD10/MAP2K4/FBXW11/PSMD4/PSMD3/PSMB7/PSMB10/PSMF1/PSMD13	24
PLAAT4	2.52888e-230	0.259867	0.382	0.171	5.56707e-226	2.52888e-228	GO:2001233	regulation of apoptotic signaling pathway	76/2012	413/18866	1.39248e-06	2.99332e-05	2.22185e-05	HSPB1/PEA15/CD74/NUPR1/SOD2/HSPA1A/YWHAZ/YWHAH/DNAJA1/FAIM2/TPT1/YWHAB/YWHAG/MIF/YWHAE/UBB/SOD1/SEPTIN4/YWHAQ/MEIS3/HNRNPK/CX3CL1/BOK/RPL11/ENO1/CLU/MAPK8IP1/RACK1/RPS3/CD44/ITM2C/SERINC3/ERP29/MAZ/ATP5IF1/BCAP31/PDIA3/OPA1/PRKCD/ARRB2/MAL/IVNS1ABP/PDCD5/PTEN/HSPA1B/TMBIM1/HYOU1/S100A8/PPP1CA/CTNNB1/BCL2L2/PPP2R1A/BNIP3/IFI6/SFPQ/FBXW7/MLLT11/STX4/PSEN1/TMBIM6/ARHGEF2/S100A9/PARP1/NF1/DEDD2/GSTP1…	76										R-HSA-163615	PKA activation	8/1351	20/10704	0.00195099	0.00949621	0.00608005	CALM3/CALM1/CALM2/PRKAR1A/PRKACB/PRKAR1B/ADCY1/ADCY5	8
SMIM29	3.88361e-230	0.274506	0.688	0.497	8.54938e-226	3.88361e-228	GO:0000910	cytokinesis	40/2012	172/18866	1.48403e-06	3.1787e-05	2.35944e-05	CALM3/ANLN/STMN1/SEPTIN3/CALM1/CALM2/CFL1/SEPTIN4/PKP4/ARF1/SPTBN1/RAB11FIP4/SEPTIN8/GIT1/RTKN/ANK3/CDC42/RAB11FIP3/CHMP1B/ANXA11/CCP110/CHMP1A/PLK2/SEPTIN7/ACTR3/PIN1/TRIM36/SEPTIN9/PDXP/RHOA/LZTS2/SEPTIN2/PRKCE/ACTR2/JTB/BCL2L1/IST1/CUL3/RHOC/MYH9	40										R-HSA-5625900	RHO GTPases activate CIT	8/1351	20/10704	0.00195099	0.00949621	0.00608005	MYL6/RAC1/PPP1CB/RHOA/MYL12B/MYL9/RHOC/MYH9	8
XPO1	6.44277e-229	0.255477	0.575	0.344	1.41831e-224	6.44277e-227	GO:0009895	negative regulation of catabolic process	63/2012	323/18866	1.50102e-06	3.20361e-05	2.37793e-05	NUPR1/APOC1/SNCA/HIPK2/ATP2B4/HSP90AB1/TIMP2/PRKCG/SNX3/DDIT4/HNRNPC/RPL5/SIRT2/RPL11/EIF4G2/RPL23/FEZ1/DDRGK1/BSCL2/PTK2/YBX1/MGAT3/PHB/AGAP2/HMGCR/TSPO/TIMP1/WDR6/TREM2/DHX9/EIF4G1/AZIN1/LARP1/USP14/RBM10/FLNA/ADORA1/CTSA/PIN1/PSEN1/PABPC1/DYSF/TBC1D14/RYBP/QSOX1/CYP51A1/HNRNPU/NBAS/TARDBP/NRBP2/USP7/HDAC4/SGTA/MAPK14/CDK5RAP3/CSNK2A1/ALAD/SMG1/SVIP/PSMF1/RNF5/UBXN1/WAC	63										R-HSA-1234174	Cellular response to hypoxia	19/1351	75/10704	0.00197397	0.00957374	0.00612969	UBA52/UBB/UBC/VEGFA/ELOB/PSMB4/RPS27A/RBX1/EGLN2/PSMA4/PSME1/PSMD10/PSMD4/PSMD3/PSMB7/PSMB10/PSMF1/PSMD13/UBE2D2	19
ATP1B2	1.35107e-228	0.251189	0.94	0.876	2.97425e-224	1.35107e-226	GO:0043525	positive regulation of neuron apoptotic process	20/2012	59/18866	1.51352e-06	3.21878e-05	2.3892e-05	NUPR1/PRNP/TYROBP/CDK5R1/BACE1/ATF4/NQO1/CDC34/GRN/CDC42/PAK3/CTNNB1/FBXW7/PIN1/JUN/RHOA/NF1/CDK5/HDAC4/MAP2K4	20										R-HSA-205043	NRIF signals cell death from the nucleus	7/1351	16/10704	0.0020365	0.00977234	0.00625684	UBA52/UBB/UBC/SQSTM1/RPS27A/PSEN1/NCSTN	7
ATP6AP1	1.67815e-228	0.240543	0.889	0.776	3.69427e-224	1.67815e-226	GO:1900449	regulation of glutamate receptor signaling pathway	21/2012	64/18866	1.52909e-06	3.24037e-05	2.40522e-05	APP/PRNP/GRIA1/NECAB2/CNIH2/CX3CL1/CACNG3/NEFL/SHISA9/GRIN2B/GRIA2/NLGN2/DLG2/DLG1/NLGN3/GRIA3/GRIN1/LRRC7/SHISA7/FRRS1L/MINK1	21										R-HSA-2173791	TGF-beta receptor signaling in EMT (epithelial to mesenchymal transition)	7/1351	16/10704	0.0020365	0.00977234	0.00625684	UBA52/UBB/FKBP1A/UBC/PRKCZ/RPS27A/RHOA	7
RPS17	5.26623e-228	0.226554	0.971	0.948	1.15931e-223	5.26623e-226	GO:0031333	negative regulation of protein-containing complex assembly	35/2012	142/18866	1.6002e-06	3.37908e-05	2.50818e-05	CRYAB/SNCA/TMSB4X/STMN1/TUBB4A/TMSB10/RPL13A/THRA/MAP2/STMN2/SPTBN1/MTPN/HSPA5/SIRT2/PFN1/CLU/STXBP1/CAPZB/JAM3/CLIP3/SPTAN1/PRKCD/CDC42/PRKCZ/DMTN/CAPZA1/GBA/FKBP4/DYRK1A/HSF1/ARHGEF2/RDX/CAPG/LDLRAD4/SVIP	35										R-HSA-399956	CRMPs in Sema3A signaling	7/1351	16/10704	0.0020365	0.00977234	0.00625684	DPYSL2/DPYSL3/CDK5R1/DPYSL5/CDK5/PLXNA2/PLXNA1	7
CX3CL1	1.64268e-227	0.25792	0.599	0.374	3.61619e-223	1.64268e-225	GO:0021801	cerebral cortex radial glia guided migration	12/2012	24/18866	1.65789e-06	3.47634e-05	2.58037e-05	RTN4/SUN2/MBOAT7/ADGRG1/CDK5R1/PAFAH1B1/CDK5R2/ZMIZ1/BMERB1/CTNNB1/SRGAP2/CDK5	12										R-HSA-8848021	Signaling by PTK6	15/1351	54/10704	0.00216979	0.0103388	0.00661956	UBA52/UBB/RAC1/HRAS/UBC/ERBB3/BCAR1/SFPQ/RPS27A/ARAP1/RHOA/ELMO2/CRK/ARHGAP35/ELMO1	15
PCSK1N	1.31287e-226	0.197547	0.998	0.993	2.89015e-222	1.31287e-224	GO:0022030	telencephalon glial cell migration	12/2012	24/18866	1.65789e-06	3.47634e-05	2.58037e-05	RTN4/SUN2/MBOAT7/ADGRG1/CDK5R1/PAFAH1B1/CDK5R2/ZMIZ1/BMERB1/CTNNB1/SRGAP2/CDK5	12										R-HSA-9006927	Signaling by Non-Receptor Tyrosine Kinases	15/1351	54/10704	0.00216979	0.0103388	0.00661956	UBA52/UBB/RAC1/HRAS/UBC/ERBB3/BCAR1/SFPQ/RPS27A/ARAP1/RHOA/ELMO2/CRK/ARHGAP35/ELMO1	15
SEMA3D	1.91439e-226	0.149651	0.156	0.019	4.21433e-222	1.91439e-224	GO:0051085	chaperone cofactor-dependent protein refolding	14/2012	32/18866	1.72315e-06	3.60054e-05	2.67257e-05	CD74/HSPA1A/HSPH1/PTGES3/HSPE1/HSPA5/DNAJB1/HSPA8/HSPA2/HSPA1B/HSPA9/ST13/DNAJB4/DNAJC7	14										R-HSA-9012852	Signaling by NOTCH3	14/1351	49/10704	0.00225715	0.0107175	0.006862	UBA52/UBB/YBX1/UBC/KAT2A/PLXND1/NEURL1/RBPJ/RPS27A/PSEN1/NCSTN/STAT1/ADAM10/FABP7	14
CD63	5.0864e-225	0.241422	0.952	0.906	1.11972e-220	5.0864e-223	GO:0051346	negative regulation of hydrolase activity	84/2012	473/18866	1.7786e-06	3.70345e-05	2.74895e-05	SERPINA3/CRYAB/C3/APOC1/PPP1R14A/SNCA/TIMP2/APP/ARPP19/GAPDH/YWHAE/BIN1/PRNP/MAP2/SPOCK1/AQP1/PCSK1N/ARL6IP1/FKBP1A/SEMA4D/SPRED1/PHACTR3/ARFGEF3/CD44/ARL2/HRAS/ENSA/PXK/PTPA/WNK1/DHCR24/ATP5IF1/SERPINI1/FARP1/BST2/BAG4/ARRB2/TIMP1/RTKN/SERPINA1/APLP2/ELFN2/SET/VEGFA/PICALM/CHP1/PRKCZ/CRB2/SPOCK2/SPINT2/CPEB2/DLG2/USP14/SORT1/PEBP1/SYTL2/TMED2/IFI6/CSTB/SLC7A14/UBE2Z/DNAJB6/PTPRN2/TMBIM6/PPP4R4/R…	84										R-HSA-6807070	PTEN Regulation	30/1351	140/10704	0.00229251	0.0108067	0.0069191	MAPK1/UBA52/UBB/MAPK3/UBC/CHD3/PTEN/PSMB4/CBX6/JUN/RPS27A/HDAC5/PSMA4/PSME1/LAMTOR2/USP7/TNKS2/PSMD10/LAMTOR4/HDAC2/CSNK2A1/PSMD4/PSMD3/PSMB7/RNF146/PSMB10/PSMF1/PSMD13/CHD4/MAF1	30
ATP6V1H	6.80802e-225	0.258755	0.914	0.837	1.49872e-220	6.80802e-223	GO:0042987	amyloid precursor protein catabolic process	18/2012	50/18866	1.85938e-06	3.8582e-05	2.86382e-05	APP/APOE/BIN1/ABCA2/PRNP/FKBP1A/CLU/BACE1/DHCR24/PICALM/IFNGR1/PIN1/DYRK1A/PSEN1/SLC2A13/NCSTN/ADAM10/FLOT2	18										R-HSA-390471	Association of TriC/CCT with target proteins during biosynthesis	12/1351	39/10704	0.00230483	0.0108067	0.0069191	CCT5/TCP1/GBA/FBXW7/CCT2/FBXL5/DCAF7/NOP56/FBXW4/FBXL3/CCT7/CCT3	12
NSMF	7.24277e-224	0.239178	0.93	0.863	1.59442e-219	7.24277e-222	GO:0099518	vesicle cytoskeletal trafficking	23/2012	75/18866	1.87199e-06	3.87094e-05	2.87327e-05	MAP2/CNIH2/KIF1A/KIF1B/PAFAH1B1/AP3S1/KIF1C/RASGRP1/PRKCZ/DTNBP1/MYO5A/DYNC1H1/SYT4/AP3B2/AP3M2/KIFAP3/DYNC1I1/TRAK2/TANC2/PPFIA2/FBXW11/KIF5B/RAB1A	23										R-HSA-9031628	NGF-stimulated transcription	12/1351	39/10704	0.00230483	0.0108067	0.0069191	ID4/SGK1/CDK5R1/ELK1/SH3GL3/JUND/CDK5R2/MEF2D/CDK5/VGF/CHD4/DNM2	12
EIF4A2	1.00529e-222	0.192571	0.999	0.997	2.21305e-218	1.00529e-220	GO:0048638	regulation of developmental growth	67/2012	353/18866	1.92318e-06	3.96307e-05	2.94166e-05	SPP1/MAPK1/CPNE6/APP/APOE/SYT1/DPYSL2/SOD1/RTN4/MAG/GDI1/SHTN1/MAP2/GJA1/SEMA3D/PAK1/RTN4R/SEMA4D/BASP1/MAPT/PPIB/CDK5R1/NRCAM/DBNL/PAFAH1B1/PTK2/RUFY3/CAPN3/ATP8A2/RAB21/TNR/SEMA4F/SEMA4A/SYT17/SEMA3E/VEGFA/PTEN/RBP4/GAMT/RASAL1/RGS4/SYT4/SPART/BCL11A/SEMA6B/PIN1/RBPJ/IFRD1/YY1/NEDD4L/LGMN/HSF1/CPNE5/FGFR2/LRP1/CDKL5/POU3F2/CDK5/BMPR2/TNKS2/POR/IST1/MAPK14/AKAP6/L1CAM/DNM2/ATRN	67										R-HSA-9694635	Translation of structural proteins	13/1351	44/10704	0.00230776	0.0108067	0.0069191	CANX/UBA52/UBB/TUSC3/UBC/MAN2A1/PRKCSH/RPN2/RPS27A/ST6GAL1/RPN1/GANAB/UBE2I	13
ARL6IP1	4.79547e-221	0.224865	0.981	0.942	1.05568e-216	4.79547e-219	GO:0022029	telencephalon cell migration	19/2012	55/18866	1.98983e-06	4.08633e-05	3.03315e-05	CNTN2/RTN4/SUN2/MBOAT7/ADGRG1/CDK5R1/PAFAH1B1/TNR/CDK5R2/FEZF2/DIXDC1/ZMIZ1/BMERB1/CTNNB1/PSEN1/RHOA/SRGAP2/POU3F2/CDK5	19										R-HSA-162906	HIV Infection	45/1351	234/10704	0.00234988	0.0109661	0.00702116	UBA52/UBB/B2M/ARF1/PPIA/AP2M1/XPO1/ATP6V1H/POLR2L/HLA-A/RAC1/UBC/SKP1/RANGAP1/BTRC/AP2S1/RAN/ELOB/AP2B1/POLR2F/PSMB4/TAF10/NEDD4L/RPS27A/RBX1/MVB12B/PSMA4/PSME1/BANF1/AP2A2/POLR2J/NMT1/PSMD10/SEH1L/ELMO1/PSMD4/SUPT5H/NELFE/PSMD3/PSMB7/AP1S1/PSMB10/PSMF1/PSMD13/KPNB1	45
KCNG1	6.42721e-220	0.192857	0.249	0.075	1.41489e-215	6.42721e-218	GO:0032253	dense core granule localization	8/2012	11/18866	2.02561e-06	4.11737e-05	3.05619e-05	MAP2/KIF1A/KIF1B/KIF1C/SYT4/TANC2/PPFIA2/KIF5B	8										R-HSA-9013507	NOTCH3 Activation and Transmission of Signal to the Nucleus	9/1351	25/10704	0.00243336	0.0113168	0.0072457	UBA52/UBB/YBX1/UBC/NEURL1/RPS27A/PSEN1/NCSTN/ADAM10	9
PTP4A2	1.12549e-219	0.297519	0.723	0.556	2.47766e-215	1.12549e-217	GO:0099519	dense core granule cytoskeletal transport	8/2012	11/18866	2.02561e-06	4.11737e-05	3.05619e-05	MAP2/KIF1A/KIF1B/KIF1C/SYT4/TANC2/PPFIA2/KIF5B	8										R-HSA-977443	GABA receptor activation	16/1351	60/10704	0.00248491	0.0115171	0.00737395	GABRA5/GNG2/NPTN/GABBR1/GNG7/GNG3/KCNJ9/GNB1/GABRB3/GNAI1/GNAL/GABBR2/ADCY1/ARHGEF9/ADCY5/GABRA2	16
SGK1	1.93208e-219	0.269939	0.34	0.144	4.25328e-215	1.93208e-217	GO:1901950	dense core granule transport	8/2012	11/18866	2.02561e-06	4.11737e-05	3.05619e-05	MAP2/KIF1A/KIF1B/KIF1C/SYT4/TANC2/PPFIA2/KIF5B	8										R-HSA-9648025	EML4 and NUDC in mitotic spindle formation	26/1351	117/10704	0.0025733	0.0118862	0.00761025	TUBA1A/TUBA1B/TUBB4A/TUBB2A/DYNLL1/XPO1/PPP2CB/TUBB3/PAFAH1B1/DYNLL2/PPP2CA/RANGAP1/DYNC1LI2/CLASP2/TAOK1/DYNC1H1/NUDC/PPP1CC/PPP2R1A/TUBA4A/DYNC1I1/CLASP1/NEK7/SEH1L/PPP2R5C/TUBB2B	26
ENC1	2.56996e-219	0.264594	0.999	0.995	5.65752e-215	2.56996e-217	GO:0006888	endoplasmic reticulum to Golgi vesicle-mediated transport	45/2012	206/18866	2.12594e-06	4.30365e-05	3.19446e-05	NSF/ANK2/GRIA1/ARF1/DYNLL1/SPTBN1/CNIH2/DCTN1/CAPZB/TMED9/PGAP1/DYNLL2/BCAP31/SPTAN1/NAPA/SERPINA1/ANK3/DYNC1LI2/PPP6R1/DCTN5/VAPA/HYOU1/DYNC1H1/CAPZA1/TMED2/COG1/PEF1/DYNC1I1/TRAPPC1/ACTR1A/TRAPPC2L/CNIH1/PREB/TMED5/YKT6/NRBP2/SCAP/KLHL12/TMED7/VAPB/TMED4/CUL3/SAR1B/RAB1A/COPA	45										R-HSA-1655829	Regulation of cholesterol biosynthesis by SREBP (SREBF)	15/1351	55/10704	0.00264218	0.0120811	0.00773505	SREBF2/SCD/HMGCR/SMARCD3/RAN/TBL1XR1/FASN/CYP51A1/DHCR7/SREBF1/SCAP/HMGCS1/LSS/SAR1B/KPNB1	15
SLC25A22	3.47195e-219	0.271497	0.712	0.54	7.64316e-215	3.47195e-217	GO:0007018	microtubule-based movement	69/2012	368/18866	2.13166e-06	4.30365e-05	3.19446e-05	HSPB1/ATP2B4/APP/UCHL1/UBB/SOD1/DYNLL1/MAP2/AQP4/SUN2/CNIH2/MAP4/NEFL/KIF3C/KIF1A/MAPT/KIF1B/FEZ1/ARL8A/PAFAH1B1/AP3S1/DYNLL2/KLC1/KIF1C/RAB27B/MAPK8IP3/HSPA8/KIF5C/OPA1/RAB21/DNAL4/KIF21B/LAMP1/PLTP/RASGRP1/DYNC1LI2/APBA1/CDC42/PRKCZ/DTNBP1/SSNA1/DLG2/DYNC1H1/ARHGAP21/DST/DYNLRB1/ARL8B/RAB6A/SFPQ/AP3B2/ACTR3/CACNA1I/CELF3/NEURL1/AP3M2/KIFAP3/DYNC1I1/TUB/UBE2B/CELSR2/TRAK2/HNRNPU/ACTR2/FBXW11/RHO…	69										R-HSA-8941858	Regulation of RUNX3 expression and activity	15/1351	55/10704	0.00264218	0.0120811	0.00773505	UBA52/UBB/UBC/PSMB4/RPS27A/PSMA4/PSME1/PSMD10/MDM2/PSMD4/PSMD3/PSMB7/PSMB10/PSMF1/PSMD13	15
CD9	1.79919e-218	0.280259	0.401	0.195	3.96073e-214	1.79919e-216	GO:0009896	positive regulation of catabolic process	81/2012	454/18866	2.25016e-06	4.51492e-05	3.35128e-05	NUPR1/HSP90AA1/HSPA1A/SNCA/PIP4K2A/APP/DNAJB2/NSF/APOE/OAZ1/ABCA2/NDFIP1/SCOC/GJA1/SIRT2/CD81/CLU/RACK1/DDRGK1/TP53INP2/APOC2/RAB7A/PIP4K2B/UQCC2/MAPK3/PTK2/ATP5IF1/BCAP31/PRKCD/NRDC/TREM2/PTEN/HSPA1B/TMEM59/TRIM8/LARP1/PLK2/ZER1/BNIP3/GBA/USP5/FBXW7/ADORA1/CNOT7/NEDD4L/PSEN1/PABPC1/CEBPA/SPTLC2/HSF1/RBX1/RDX/DVL1/HSPBP1/HSPB8/EGLN2/DDA1/SNX1/LRP1/ATG4B/MTDH/FBXL5/APC2/TARDBP/PRKCE/PSMD10/RAB3GAP…	81										R-HSA-9639288	Amino acids regulate mTORC1	15/1351	55/10704	0.00264218	0.0120811	0.00773505	ATP6V0C/ATP6V1H/ATP6V1B2/ATP6V1G2/ATP6V1A/ATP6V0E2/ATP6V0B/ATP6V1C1/ATP6V1E1/ATP6V0D1/ATP6V1F/ATP6V1D/LAMTOR2/SEH1L/LAMTOR4	15
RNASEK	2.49405e-218	0.215695	0.975	0.949	5.4904e-214	2.49405e-216	GO:1901888	regulation of cell junction assembly	44/2012	200/18866	2.25142e-06	4.51492e-05	3.35128e-05	APOD/MAP4K4/SNCA/THY1/CLSTN2/APP/SLIT1/S100A10/CLSTN1/GPM6B/GJA1/SEMA4D/GAP43/ADGRL3/RAC1/PTK2/FAM107A/SEMA4A/LRRTM1/CLASP2/VEGFA/EIF4G1/PTEN/NECTIN1/NLGN2/CHRNB2/DMTN/LIMCH1/NLGN3/ADGRB2/CLSTN3/GRIN1/RHOA/CLASP1/DUSP22/LRP1/ADGRB3/LRRTM2/PTPRD/PTPRJ/SLITRK1/FLOT1/RAP1A/LRRC4B	44										R-HSA-168164	Toll Like Receptor 3 (TLR3) Cascade	22/1351	94/10704	0.00271287	0.0123627	0.00791535	MAPK1/MAP2K1/APP/UBA52/UBB/PPP2CB/ELK1/MAPK3/UBC/PPP2CA/SKP1/BTRC/PPP2R1A/UBE2N/JUN/RPS27A/RPS6KA2/DUSP7/MAPK14/MAP2K4/FBXW11/UBE2D2	22
PPP3CB	4.71601e-218	0.233582	0.941	0.868	1.03818e-213	4.71601e-216	GO:0051261	protein depolymerization	30/2012	115/18866	2.50564e-06	5.00793e-05	3.71723e-05	STMN4/STMN1/SH3GL2/STMN3/DNAJC6/CFL1/STMN2/SPTBN1/MTPN/CAPZB/HSPA8/SPTAN1/CLASP2/TAOK1/MID1IP1/WDR1/MAP6D1/DMTN/CAPZA1/DSTN/BMERB1/SYNJ1/CFL2/PDXP/ARHGEF2/RDX/CLASP1/CAPG/APC2/MICAL3	30										R-HSA-5619084	ABC transporter disorders	19/1351	77/10704	0.00273212	0.0123674	0.00791836	UBA52/UBB/UBC/SEL1L/PSMB4/RPS27A/DERL1/PSMA4/PSME1/ABCB6/PSMD10/PSMD4/ABCA3/PSMD3/PSMB7/PSMB10/PSMF1/RNF5/PSMD13	19
PKM	7.80803e-218	0.188111	0.999	0.998	1.71886e-213	7.80803e-216	GO:0006665	sphingolipid metabolic process	38/2012	163/18866	2.52328e-06	5.02638e-05	3.73091e-05	PSAP/SERINC1/ABCA2/ENPP2/UGT8/LARGE1/RACK1/SERINC3/ELOVL1/FA2H/PPP2CA/PRKCD/B3GALT2/B4GALNT1/PLPP2/VAPA/CERS6/ELOVL5/PPP2R1A/B3GALNT1/GBA/TEX2/CTSA/GLTP/PPT1/SPNS2/SPTLC2/SMPD1/CERS4/CERS2/ASAH1/PDXDC1/ST3GAL5/ITGB8/TECR/PPM1L/VAPB/SAMD8	38										R-HSA-9009391	Extra-nuclear estrogen signaling	19/1351	77/10704	0.00273212	0.0123674	0.00791836	HSPB1/HSP90AA1/MAPK1/CALM3/CALM1/CALM2/GNG2/XPO1/UHMK1/ELK1/MAPK3/PTK2/HRAS/GNG7/GNG3/GNB1/PRKCZ/GNAI1/PIK3R2	19
FBXL16	1.09554e-217	0.206912	0.989	0.971	2.41172e-213	1.09554e-215	GO:0007612	learning	35/2012	145/18866	2.67882e-06	5.31849e-05	3.94774e-05	GABRA5/CNTN2/APP/SLC8A2/PPP3CB/ATP1A2/ATP8A1/NEUROD2/SYNPO/NDRG4/NPTN/NPTX2/RGS14/VDAC1/HMGCR/TNR/NRXN2/GMFB/CHRNB2/NLGN3/SLC12A5/JPH4/SYNJ1/PPT1/GRIN1/JUN/GRM5/LGMN/NF1/SYNGAP1/ADGRB3/CDK5/COMT/ACTR2/RIC8A	35										R-HSA-211733	Regulation of activated PAK-2p34 by proteasome mediated degradation	14/1351	50/10704	0.00277778	0.0125323	0.00802394	UBA52/UBB/UBC/PSMB4/RPS27A/PSMA4/PSME1/PSMD10/PSMD4/PSMD3/PSMB7/PSMB10/PSMF1/PSMD13	14
POLR2L	8.34525e-217	0.239156	0.902	0.823	1.83712e-212	8.34525e-215	GO:0043487	regulation of RNA stability	43/2012	195/18866	2.73984e-06	5.41794e-05	4.02156e-05	HSPB1/HSPA1A/YWHAZ/YWHAB/UBA52/UBB/HNRNPC/XPO1/YBX1/UBC/HSPA8/PRKCD/FXR1/SET/DHX9/EIF4G1/LARP1/PSMB4/RBM10/ANP32A/RPS27A/PABPC1/PCBP4/PABPC4/PSMA4/PSME1/HNRNPU/TARDBP/SAMD4B/PSMD10/MAPK14/PSMD4/YTHDF3/YTHDF2/PUM1/PSMD3/PSMB7/PSMB10/PSMF1/MYEF2/PSMD13/ALKBH5/VIM	43										R-HSA-416572	Sema4D induced cell migration and growth-cone collapse	8/1351	21/10704	0.00280691	0.0125802	0.00805458	MYL6/SEMA4D/PLXNB1/RHOA/MYL12B/MYL9/RHOC/MYH9	8
TAGLN3	3.03444e-216	0.224253	0.975	0.927	6.68001e-212	3.03444e-214	GO:0120034	positive regulation of plasma membrane bounded cell projection assembly	28/2012	104/18866	2.74705e-06	5.41794e-05	4.02156e-05	ANLN/GPM6A/DPYSL3/COBL/FSCN1/PFN1/RAC1/HRAS/KCTD17/CDC42/RIPOR2/PALM/CCP110/SEPTIN7/ACTR3/MIEN1/NEURL1/FAM98A/NCKAP1/CDC42EP1/ARAP1/SEPTIN9/BRK1/ARHGAP35/ACTR2/HDAC4/ATMIN/DNM2	28										R-HSA-445144	Signal transduction by L1	8/1351	21/10704	0.00280691	0.0125802	0.00805458	MAPK1/NCAM1/MAP2K1/PAK1/RAC1/MAPK3/CSNK2A1/L1CAM	8
HLA-B	4.64095e-216	0.30081	0.838	0.765	1.02166e-211	4.64095e-214	GO:0061013	regulation of mRNA catabolic process	45/2012	208/18866	2.7974e-06	5.4991e-05	4.0818e-05	HSPB1/HSPA1A/YWHAZ/YWHAB/UBA52/UBB/HNRNPC/XPO1/YBX1/UBC/HSPA8/PRKCD/FXR1/SET/DHX9/EIF4G1/LARP1/PSMB4/RBM10/CNOT7/ANP32A/RPS27A/PABPC1/PCBP4/PABPC4/PSMA4/PSME1/HNRNPU/NBAS/TARDBP/SAMD4B/PSMD10/MAPK14/PSMD4/YTHDF3/YTHDF2/PUM1/PSMD3/PSMB7/PSMB10/PSMF1/MYEF2/PSMD13/ALKBH5/VIM	45										R-HSA-445355	Smooth Muscle Contraction	12/1351	40/10704	0.00292111	0.0129636	0.00830008	CALM3/CALM1/CALM2/PAK1/MYL6/GUCY1B1/TPM3/DYSF/TLN1/MYL12B/MYL9/TPM1	12
LAMP2	7.04382e-216	0.319519	0.637	0.443	1.55063e-211	7.04382e-214	GO:0038093	Fc receptor signaling pathway	50/2012	241/18866	2.90587e-06	5.68691e-05	4.22121e-05	HSP90AA1/MAPK1/HSP90AB1/CALM1/ACTB/FCER1G/PPP3CB/PAK1/ARPC5/CYFIP2/RAC1/MAPK3/PTK2/SKP1/PRKCD/ARPC4/FCGR3A/BAIAP2/CDC42/BTRC/GRB2/ARPC3/PSMB4/PIK3R2/CD47/ACTR3/ARPC1B/NCKAP1/JUN/BRK1/ELMO2/PSMA4/PSME1/PPP3R1/PTPRJ/CRK/PRKCE/ACTR2/PSMD10/MAP2K4/ELMO1/FBXW11/PSMD4/PSMD3/PSMB7/PSMB10/PSMF1/PSMD13/RAP1A/ARPC1A	50										R-HSA-5654741	Signaling by FGFR3	12/1351	40/10704	0.00292111	0.0129636	0.00830008	MAPK1/UBA52/UBB/PPP2CB/MAPK3/HRAS/FGF1/UBC/PPP2CA/GRB2/PPP2R1A/RPS27A	12
ITGB2	1.23341e-215	0.242236	0.32	0.128	2.71523e-211	1.23341e-213	GO:0006900	vesicle budding from membrane	29/2012	110/18866	2.91197e-06	5.68691e-05	4.22121e-05	NSF/GRIA1/S100A10/ARF1/SNX3/AP2M1/CNIH2/DNM1/SNAP91/RAB7A/TMED9/NAPA/SERPINA1/PPP6R1/VAPA/PICALM/TMED2/PEF1/TRAPPC1/TRAPPC2L/CNIH1/PREB/SCAP/KLHL12/VAPB/CUL3/SAR1B/RAB1A/DNM2	29										R-HSA-5674135	MAP2K and MAPK activation	12/1351	40/10704	0.00292111	0.0129636	0.00830008	MAPK1/MAP2K1/YWHAB/ACTB/MAPK3/HRAS/ARRB2/PEBP1/CNKSR2/LAMTOR2/TLN1/RAP1A	12
LAPTM5	2.63712e-215	0.258419	0.47	0.251	5.80535e-211	2.63712e-213	GO:0021795	cerebral cortex cell migration	16/2012	42/18866	2.92269e-06	5.68926e-05	4.22295e-05	RTN4/SUN2/MBOAT7/ADGRG1/CDK5R1/PAFAH1B1/CDK5R2/DIXDC1/ZMIZ1/BMERB1/CTNNB1/PSEN1/RHOA/SRGAP2/POU3F2/CDK5	16										R-HSA-264642	Acetylcholine Neurotransmitter Release Cycle	7/1351	17/10704	0.00308848	0.0136344	0.00872957	SYT1/STX1A/VAMP2/STXBP1/TSPOAP1/PPFIA2/PPFIA3	7
UGT8	2.72579e-215	0.225938	0.23	0.065	6.00056e-211	2.72579e-213	GO:0033673	negative regulation of kinase activity	54/2012	268/18866	3.01171e-06	5.84349e-05	4.33743e-05	HSPB1/DBNDD2/SNCA/THY1/DNAJA1/UCHL1/APOE/YWHAG/SPRED1/PRKAR1A/MAPK8IP1/MAPT/RACK1/SRCIN1/RGS14/CAMK2N1/WNK1/PPP2CA/HMGCR/PRKCD/PKIA/CHORDC1/IPO7/CHP1/PTEN/DTNBP1/GMFB/SH3BP5/RGS4/PRKAR1B/PPP2R1A/GBA/GSKIP/ADAR/CDKN1C/GNAQ/PSEN1/CEBPA/SMPD1/DVL1/PRKAG2/NF1/GSTP1/DUSP22/DUSP7/HNRNPU/PTPRJ/RTRAF/DUSP26/SNX6/CDK5RAP3/HEXIM1/PTPRT/IPO5	54										R-HSA-168898	Toll-like Receptor Cascades	32/1351	155/10704	0.00311009	0.0136344	0.00872957	HSP90B1/MAPK1/CTSB/MAP2K1/APP/UBA52/UBB/ITGB2/DNM1/PPP2CB/ELK1/MAPK3/UBC/PPP2CA/SKP1/BTRC/S100A8/CNPY3/CTSS/PPP2R1A/UBE2N/JUN/RPS27A/LGMN/S100A9/RPS6KA2/DUSP7/MAPK14/MAP2K4/FBXW11/DNM2/UBE2D2	32
KLK7	7.92759e-215	0.189996	0.242	0.072	1.74518e-210	7.92759e-213	GO:0051056	regulation of small GTPase mediated signal transduction	62/2012	323/18866	3.1375e-06	6.06786e-05	4.50398e-05	MAP4K4/TIMP2/STMN1/PSD3/STMN3/MAPRE2/APOE/LPAR1/GDI1/ARHGDIA/RTN4R/PPP2CB/ADGRG1/ERBIN/RAP1GAP/ARHGDIG/ARFGEF3/RAC1/CHN1/HRAS/ABR/ARHGDIB/CDC42SE2/PREX1/RASGRP1/CDC42/RIPOR2/GRB2/RAP1GAP2/ARHGAP23/RHOU/RASAL1/ARHGAP21/IQSEC1/PIK3R2/IQSEC2/SQSTM1/ITPKB/CRKL/PSD2/ARHGEF9/RHOG/CADM4/ARHGAP1/ARAP1/LZTR1/ARHGEF2/RDX/RHOA/NF1/SYNGAP1/SRGAP2/KCTD13/CRK/ARHGAP35/FLOT1/RHOT1/CUL3/RHOC/CYTH1/DNM2/A2M	62										R-HSA-202670	ERKs are inactivated	6/1351	13/10704	0.00311242	0.0136344	0.00872957	MAPK1/PPP2CB/MAPK3/PPP2CA/PPP2R1A/DUSP7	6
RNF130	2.32339e-214	0.262378	0.703	0.526	5.11471e-210	2.32339e-212	GO:0051348	negative regulation of transferase activity	58/2012	296/18866	3.31878e-06	6.39775e-05	4.74884e-05	HSPB1/DBNDD2/SNCA/THY1/DNAJA1/UCHL1/APOE/YWHAG/EIF4A2/RPL5/RPL11/SPRED1/PRKAR1A/MAPK8IP1/MAPT/RPL23/RACK1/SRCIN1/RGS14/CAMK2N1/WNK1/PPP2CA/HMGCR/PRKCD/PKIA/CHORDC1/IPO7/CHP1/PTEN/DTNBP1/GMFB/SH3BP5/RGS4/PRKAR1B/PPP2R1A/GBA/GSKIP/ADAR/CDKN1C/GNAQ/PSEN1/CEBPA/SMPD1/DVL1/PRKAG2/NF1/GSTP1/DUSP22/DUSP7/HNRNPU/PTPRJ/RTRAF/DUSP26/SNX6/CDK5RAP3/HEXIM1/PTPRT/IPO5	58										R-HSA-75035	Chk1/Chk2(Cds1) mediated inactivation of Cyclin B:Cdk1 complex	6/1351	13/10704	0.00311242	0.0136344	0.00872957	YWHAZ/YWHAH/YWHAB/YWHAG/YWHAE/YWHAQ	6
MBOAT7	1.10569e-213	0.240804	0.881	0.792	2.43406e-209	1.10569e-211	GO:0097193	intrinsic apoptotic signaling pathway	57/2012	290/18866	3.6389e-06	6.9923e-05	5.19016e-05	HSPB1/CD74/NUPR1/SOD2/HSPA1A/HIPK2/DNAJA1/TPT1/MIF/UBB/SOD1/SEPTIN4/DDIT4/HNRNPK/BOK/RPL11/ENO1/CLU/MAPK8IP1/CD24/RACK1/RPS3/CD44/HRAS/SERINC3/ERP29/ARL6IP5/BCAP31/OPA1/ATF4/PRKCD/IVNS1ABP/PHLDA3/HYOU1/S100A8/BCL2L2/DDX5/BNIP3/IFI6/GSKIP/SFPQ/FBXW7/CDIP1/MLLT11/UBE2K/TMBIM6/ARHGEF2/S100A9/PARP1/RPL26/SHISA5/P4HB/BCL2L1/MDM2/HERPUD1/CUL3/CYLD	57										R-HSA-5362768	Hh mutants that don't undergo autocatalytic processing are degraded by ERAD	15/1351	56/10704	0.00319638	0.0139572	0.00893624	UBA52/UBB/UBC/SEL1L/PSMB4/RPS27A/PSMA4/PSME1/PSMD10/PSMD4/PSMD3/PSMB7/PSMB10/PSMF1/PSMD13	15
RPL19	6.48147e-213	0.204364	0.993	0.989	1.42683e-208	6.48147e-211	GO:1904375	regulation of protein localization to cell periphery	31/2012	123/18866	3.76073e-06	7.20325e-05	5.34674e-05	ATP2B4/ACTB/ABCA2/PRNP/AP2M1/SPTBN1/RACK1/CLTC/HRAS/CLIP3/TREM2/PICALM/PRKCZ/STX7/TMEM59/TMBIM1/GNAI1/DLG1/IQSEC2/SQSTM1/STX4/RHOG/PID1/AKAP5/LRP1/CDK5/PRKCE/BCL2L1/ADAM10/KIF5B/RAP1A	31										R-HSA-1169091	Activation of NF-kappaB in B cells	17/1351	67/10704	0.00327423	0.0142513	0.00912455	UBA52/UBB/UBC/SKP1/BTRC/PSMB4/RPS27A/PSMA4/PSME1/PSMD10/FBXW11/PSMD4/PSMD3/PSMB7/PSMB10/PSMF1/PSMD13	17
PDIA6	9.10654e-213	0.258912	0.558	0.335	2.00471e-208	9.10654e-211	GO:0000041	transition metal ion transport	32/2012	129/18866	3.80599e-06	7.24351e-05	5.37662e-05	TF/FTL/FTH1/ATP6V0C/B2M/SLC30A3/ATP6AP1/ATP6V1H/ATP6V1B2/ATP2C1/ATP6V1G2/ATP6V1A/CLTC/ATP6V0E2/ATP6V0A1/ATP6V0B/ATP6V1C1/ATP6V1E1/ATP6V0D1/TMEM165/SLC39A10/ATP6V1F/NECTIN1/SLC22A17/FKBP4/ATP6V1D/ARHGAP1/SLC30A9/ABCB6/PGRMC2/SFXN1/DNM2	32										R-HSA-2173788	Downregulation of TGF-beta receptor signaling	9/1351	26/10704	0.00331077	0.0143643	0.0091969	UBA52/UBB/XPO1/UBC/PPP1CA/PPP1CC/PPP1CB/NEDD4L/RPS27A	9
MT-CYB	1.23169e-212	0.223122	1	1	2.71145e-208	1.23169e-210	GO:0002576	platelet degranulation	32/2012	129/18866	3.80599e-06	7.24351e-05	5.37662e-05	SERPINA3/TF/TMSB4X/APP/CALM1/SOD1/PSAP/FCER1G/CD63/CD9/LAMP2/CLU/STXBP1/ANXA5/RAB27B/SELENOP/TIMP1/SERPINA1/APLP2/VEGFA/CHID1/WDR1/LGALS3BP/DMTN/FLNA/TUBA4A/MANF/QSOX1/PCDH7/TLN1/ENDOD1/A2M	32										R-HSA-3928665	EPH-ephrin mediated repulsion of cells	14/1351	51/10704	0.00339305	0.0146744	0.00939543	ACTB/AP2M1/DNM1/RAC1/CLTC/CLTA/AP2S1/AP2B1/EFNB3/PSEN1/CLTB/NCSTN/AP2A2/ADAM10	14
LHPP	1.26237e-212	0.271472	0.511	0.295	2.77899e-208	1.26237e-210	GO:0010821	regulation of mitochondrion organization	42/2012	191/18866	3.8391e-06	7.28333e-05	5.40617e-05	HSPA1A/YWHAZ/YWHAH/YWHAB/YWHAG/YWHAE/SREBF2/YWHAQ/PDE2A/BOK/CLU/MAPT/ATP5IF1/VDAC1/OPA1/BAG4/ARRB2/TSPO/INF2/TREM2/PDCD5/RHOU/BCL2L2/BNIP3/GBA/UBL5/SQSTM1/FBXW7/BAP1/MLLT11/PID1/PPP3R1/SREBF1/MPV17/VAT1/HAX1/NMT1/PSMD10/BCL2L1/RHOT1/STAT2/BNIP3L	42										R-HSA-5654738	Signaling by FGFR2	18/1351	73/10704	0.00351938	0.0151244	0.00968358	MAPK1/UBA52/UBB/POLR2L/PPP2CB/HNRNPA1/MAPK3/HRAS/FGF1/UBC/PPP2CA/GRB2/POLR2F/PPP2R1A/RPS27A/FGFR2/POLR2J/TIAL1	18
FKBP1A	6.61028e-212	0.238212	0.901	0.813	1.45519e-207	6.61028e-210	GO:0034504	protein localization to nucleus	55/2012	277/18866	3.89876e-06	7.3731e-05	5.47281e-05	APOD/MAPK1/HSP90AB1/CALR/YWHAE/SUN2/XPO1/RPL11/RPL23/TXN/ARL2/IPO13/SKP1/PRKCD/PKIA/RANGAP1/IPO7/CCT5/CHP1/RAN/TRIM8/CTDNEP1/TCP1/FLNA/PIK3R2/PIN1/DCLK1/HCLS1/PSEN1/NUTF2/UFM1/CCT2/DNAJB6/ARL2BP/DVL1/PARP1/CSE1L/NF1/DCLK2/LZTS2/HNRNPU/KPNA4/PPP1R10/TARDBP/CDK5/SUMO3/MDM2/MAPK14/CDK5RAP3/OSBPL8/FAM53C/CCT7/CCT3/IPO5/KPNB1	55										R-HSA-8939902	Regulation of RUNX2 expression and activity	18/1351	73/10704	0.00351938	0.0151244	0.00968358	UBA52/UBB/UBC/SKP1/PSMB4/FBXW7/RPS27A/RBX1/PSMA4/PSME1/STAT1/PSMD10/PSMD4/PSMD3/PSMB7/PSMB10/PSMF1/PSMD13	18
SVOP	1.48039e-211	0.242561	0.482	0.266	3.25893e-207	1.48039e-209	GO:0021543	pallium development	39/2012	173/18866	4.47403e-06	8.43433e-05	6.26052e-05	ATP2B4/NPY/YWHAE/RTN4/ID4/SUN2/MBOAT7/ADGRG1/NEFL/FEZ1/CDK5R1/PAFAH1B1/NEUROD6/BCAN/PTEN/ZEB2/CDK5R2/FEZF2/DIXDC1/ZMIZ1/BMERB1/CTNNB1/BNIP3/FLNA/CRKL/GRIN1/PSEN1/WDR47/RHOA/NF1/SRGAP2/DCLK2/TACC1/LRP1/CRK/POU3F2/CDK5/KIF5B/CDH2	39										R-HSA-450282	MAPK targets/ Nuclear events mediated by MAP kinases	10/1351	31/10704	0.0035861	0.0153625	0.00983603	MAPK1/PPP2CB/ELK1/MAPK3/PPP2CA/PPP2R1A/JUN/RPS6KA2/DUSP7/MAPK14	10
UHMK1	2.63714e-211	0.24825	0.621	0.406	5.80539e-207	2.63714e-209	GO:0051131	chaperone-mediated protein complex assembly	11/2012	22/18866	4.55231e-06	8.55491e-05	6.35003e-05	HSP90AA1/HSPA1A/HSP90AB1/PTGES3/HSPD1/CLU/HSPA4/HOPX/PFDN6/CCT2/LONP1	11										R-HSA-5654743	Signaling by FGFR4	12/1351	41/10704	0.00366441	0.0156	0.00998808	MAPK1/UBA52/UBB/PPP2CB/MAPK3/HRAS/FGF1/UBC/PPP2CA/GRB2/PPP2R1A/RPS27A	12
NPDC1	6.65287e-211	0.232984	0.926	0.849	1.46456e-206	6.65287e-209	GO:1900271	regulation of long-term synaptic potentiation	17/2012	48/18866	4.63661e-06	8.68601e-05	6.44734e-05	APP/APOE/PRNP/TYROBP/NPTN/FAM107A/NLGN3/SQSTM1/ADORA1/ADCY1/CALB1/LGMN/NCSTN/SHISA7/STAU1/NF1/AKAP5	17										R-HSA-8957275	Post-translational protein phosphorylation	24/1351	108/10704	0.00368731	0.0156	0.00998808	SPP1/TF/C3/HSP90B1/APP/APOE/PDIA6/TMEM132A/IGFBP5/TIMP1/NUCB1/SERPINA1/APLP2/RCN1/VWA1/PRKCSH/TGOLN2/VCAN/QSOX1/SHISA5/P4HB/ADAM10/VGF/CDH2	24
TRIM2	4.41087e-210	0.23993	0.885	0.788	9.7101e-206	4.41087e-208	GO:0007215	glutamate receptor signaling pathway	27/2012	101/18866	4.76003e-06	8.88935e-05	6.59828e-05	APP/PRNP/GRIA1/NECAB2/CNIH2/CX3CL1/CACNG3/NEFL/CDK5R1/SHISA9/SSTR1/GRIN2B/GRIA2/NLGN2/DLG2/GRM3/DLG1/NLGN3/GNAQ/GRIA3/GRIN1/LRRC7/GRM5/NCSTN/SHISA7/FRRS1L/MINK1	27										R-HSA-6802948	Signaling by high-kinase activity BRAF mutants	11/1351	36/10704	0.00368749	0.0156	0.00998808	MAPK1/MAP2K1/YWHAB/ACTB/MAPK3/HRAS/ARRB2/PEBP1/CNKSR2/TLN1/RAP1A	11
PAK1	4.80465e-210	0.252906	0.851	0.757	1.0577e-205	4.80465e-208	GO:0021537	telencephalon development	52/2012	259/18866	5.07611e-06	9.4501e-05	7.0145e-05	ATP2B4/NPY/CNTN2/YWHAE/RTN4/LPAR1/ID4/SUN2/AQP1/ATP1B2/MBOAT7/ATP1A2/RTN4R/ADGRG1/NEFL/FEZ1/CDK5R1/PAFAH1B1/NUMBL/CSF1R/NEUROD6/TNR/KAT2A/BCAN/RTN4RL2/PTEN/ZEB2/CDK5R2/FEZF2/DIXDC1/ZMIZ1/BMERB1/CTNNB1/BNIP3/FLNA/CRKL/GRIN1/PSEN1/NFIB/WDR47/RHOA/NF1/SRGAP2/DCLK2/TACC1/LRP1/CRK/POU3F2/CDK5/KIF5B/CDH2/HPRT1	52										R-HSA-6804757	Regulation of TP53 Degradation	11/1351	36/10704	0.00368749	0.0156	0.00998808	UBA52/UBB/SGK1/PPP2CB/UBC/PPP2CA/PPP2R1A/RPS27A/USP7/MDM2/PPP2R5C	11
DNM1	5.39068e-209	0.195434	0.999	0.997	1.1867e-204	5.39068e-207	GO:0045862	positive regulation of proteolysis	68/2012	370/18866	5.14435e-06	9.54741e-05	7.08673e-05	MBP/NUPR1/HSPA1A/SNCA/CNTN2/MTCH1/APP/DNAJB2/CTSD/APOE/HSPD1/HSPE1/BOK/SIRT2/ENO1/CLU/MAPT/RACK1/DDRGK1/CYFIP2/RPS3/MAPK3/PTK2/CAPN3/ARL6IP5/ATP5IF1/BCAP31/GRIN2B/NRDC/GRN/TREM2/PDCD5/BTRC/PICALM/PTEN/HSPA1B/S100A8/PLK2/ANP32B/ZER1/GBA/USP5/FBXW7/AKIRIN2/GRIN1/PSEN1/LGMN/CEBPA/HSF1/RBX1/S100A9/DVL1/RHOA/HSPBP1/DDA1/PSME1/PSMD10/SGTA/MDM2/IST1/MAPK14/HDAC2/FBXW11/KEAP1/HERPUD1/CSNK1E/TMEM259/MYH9	68										R-HSA-8852135	Protein ubiquitination	19/1351	79/10704	0.00371982	0.0156879	0.0100444	UBA52/UBB/HLA-A/UBC/CDC34/UBA1/USP5/USP9X/UBE2R2/UBE2N/RPS27A/UBE2Z/UBE2K/UBE2W/DERL1/UBE2B/USP7/WAC/UBE2D2	19
HNRNPA2B1	3.74248e-208	0.20494	0.976	0.952	8.2387e-204	3.74248e-206	GO:0043687	post-translational protein modification	67/2012	363/18866	5.18579e-06	9.59451e-05	7.12169e-05	SPP1/TF/C3/HSP90B1/APP/APOE/ABCA2/PTP4A2/FBXL16/PDIA6/TMEM132A/RAB2A/IGFBP5/WSB2/SKP1/TIMP1/NUCB1/SERPINA1/APLP2/RCN1/VWA1/BTRC/ELOB/CRTAP/COPS7A/PSMB4/PRKCSH/TGOLN2/FBXW7/STT3B/FBXO41/RBX1/FN3KRP/VCAN/DDA1/PSMA4/QSOX1/PSME1/KBTBD6/SHISA5/P4HB/WSB1/FBXL5/DCAF7/RAB5A/FBXO11/FBXO44/PSMD10/FBXW4/TULP4/FBXL3/LMO7/ADAM10/VGF/FBXW11/PSMD4/KEAP1/BTBD1/CUL3/RAB1A/PSMD3/COPS8/PSMB7/PSMB10/PSMF1/CDH2/PSMD13	67										R-HSA-69541	Stabilization of p53	15/1351	57/10704	0.0038426	0.0161556	0.0103438	UBA52/UBB/UBC/PSMB4/RPS27A/PSMA4/PSME1/PSMD10/MDM2/PSMD4/PSMD3/PSMB7/PSMB10/PSMF1/PSMD13	15
RPLP2	4.86985e-208	0.196178	0.995	0.991	1.07205e-203	4.86985e-206	GO:0021819	layer formation in cerebral cortex	8/2012	12/18866	5.50502e-06	0.000101225	7.51357e-05	MBOAT7/ADGRG1/CDK5R1/PAFAH1B1/CDK5R2/BMERB1/CTNNB1/CDK5	8										R-HSA-111931	PKA-mediated phosphorylation of CREB	8/1351	22/10704	0.0039294	0.0162687	0.0104162	CALM3/CALM1/CALM2/PRKAR1A/PRKACB/PRKAR1B/ADCY1/ADCY5	8
SLC6A8	1.01878e-207	0.249967	0.575	0.358	2.24274e-203	1.01878e-205	GO:0061517	macrophage proliferation	8/2012	12/18866	5.50502e-06	0.000101225	7.51357e-05	MAPK1/CX3CL1/CLU/MAPK3/PTK2/CSF1R/IL34/TREM2	8										R-HSA-8862803	Deregulated CDK5 triggers multiple neurodegenerative pathways in Alzheimer's disease models	8/1351	22/10704	0.0039294	0.0162687	0.0104162	SOD2/APP/YWHAE/CDK5R1/CAPNS1/PRDX1/JUN/CDK5	8
RAB6B	1.17183e-207	0.212039	0.988	0.961	2.57966e-203	1.17183e-205	GO:0009266	response to temperature stimulus	48/2012	233/18866	5.57391e-06	0.000102177	7.58426e-05	CRYAB/HSP90AA1/HSPA1A/MAPK1/HSP90AB1/HSPH1/CAMK2D/DNAJA1/PTGES3/YWHAE/SOD1/THRA/HSPD1/DNAJA4/ATP2A2/PCSK1N/MAPT/MAPK3/DNAJB1/FGF1/HSPA8/BAG4/ARRB2/LRP11/CHORDC1/HSPA2/HSBP1/CDH8/HSPA1B/FKBP4/SLC12A5/ANO3/ADORA1/DNAJB4/DNAJC7/HSF1/DNAJB6/WDR47/CAMK2B/NF1/HSPB8/NFE2L1/ATP2B1/SLC27A1/ARPP21/SEH1L/HDAC2/VGF	48										R-HSA-8863678	Neurodegenerative Diseases	8/1351	22/10704	0.0039294	0.0162687	0.0104162	SOD2/APP/YWHAE/CDK5R1/CAPNS1/PRDX1/JUN/CDK5	8
SOX2-OT	1.57077e-207	0.309469	0.55	0.34	3.4579e-203	1.57077e-205	GO:2000060	positive regulation of ubiquitin-dependent protein catabolic process	27/2012	102/18866	5.82297e-06	0.000106416	7.89892e-05	HSPA1A/DNAJB2/SIRT2/CLU/RACK1/DDRGK1/PTK2/BCAP31/PTEN/HSPA1B/PLK2/ZER1/GBA/USP5/FBXW7/PSEN1/CEBPA/RBX1/DVL1/HSPBP1/DDA1/PSMD10/SGTA/MDM2/KEAP1/HERPUD1/CSNK1E	27										R-HSA-912631	Regulation of signaling by CBL	8/1351	22/10704	0.0039294	0.0162687	0.0104162	UBA52/UBB/UBC/GRB2/PIK3R2/CRKL/RPS27A/CRK	8
ATP1A2	2.77169e-207	0.212782	0.985	0.957	6.10159e-203	2.77169e-205	GO:1902904	negative regulation of supramolecular fiber organization	36/2012	156/18866	5.86938e-06	0.000106937	7.93761e-05	CRYAB/SNCA/TMSB4X/STMN1/TUBB4A/APOE/TMSB10/CORO1A/MAP2/STMN2/SPTBN1/MTPN/TMEFF2/PFN1/CLU/CAPZB/HSPA8/CLIP3/SPTAN1/PRKCD/CLASP2/TAOK1/MID1IP1/GMFB/MAP6D1/DMTN/CAPZA1/BMERB1/FKBP4/DYRK1A/ARAP1/ARHGEF2/RDX/CLASP1/CAPG/APC2	36										R-HSA-9609523	Insertion of tail-anchored proteins into the endoplasmic reticulum membrane	8/1351	22/10704	0.0039294	0.0162687	0.0104162	APP/STX1A/PRNP/VAMP2/VAPA/GET1/CYB5A/SGTA	8
ATP6V1B2	3.14308e-206	0.233258	0.942	0.864	6.91918e-202	3.14308e-204	GO:0044091	membrane biogenesis	16/2012	44/18866	5.94299e-06	0.000107949	8.01272e-05	PSAP/SERINC1/S100A10/SPTBN1/CLIP3/ANK3/NRXN2/PICALM/PTEN/NLGN2/NLGN3/STX4/PTPRD/FLOT1/CDH2/FLOT2	16										R-HSA-975138	TRAF6 mediated induction of NFkB and MAP kinases upon TLR7/8 or 9 activation	21/1351	91/10704	0.00400027	0.0165117	0.0105718	MAPK1/MAP2K1/APP/UBA52/UBB/PPP2CB/ELK1/MAPK3/UBC/PPP2CA/SKP1/BTRC/PPP2R1A/UBE2N/JUN/RPS27A/RPS6KA2/DUSP7/MAPK14/MAP2K4/FBXW11	21
RPL17	9.78225e-206	0.173883	0.999	0.998	2.15346e-201	9.78225e-204	GO:0045921	positive regulation of exocytosis	25/2012	91/18866	6.25295e-06	0.000113235	8.40508e-05	SNCA/SYT1/STX1A/ARF1/FCER1G/ATP6AP1/ITGB2/STXBP1/RAB7A/NCS1/RAB27B/LAMP1/CLASP2/CDK5R2/SYT4/CACNA1I/STX4/HGS/CLASP1/CADPS/SCAMP5/SYT7/RAB15/CDK5/RAB5A	25										R-HSA-349425	Autodegradation of the E3 ubiquitin ligase COP1	14/1351	52/10704	0.00411516	0.0166818	0.0106807	UBA52/UBB/UBC/PSMB4/RPS27A/PSMA4/PSME1/PSMD10/PSMD4/PSMD3/PSMB7/PSMB10/PSMF1/PSMD13	14
TMEFF2	7.01513e-205	0.240282	0.439	0.231	1.54431e-200	7.01513e-203	GO:0071349	cellular response to interleukin-12	17/2012	49/18866	6.39796e-06	0.000115511	8.57402e-05	SOD2/MIF/SOD1/CFL1/ARF1/PPIA/RPLP0/HNRNPA2B1/SIRPA/CDC42/HSPA9/CAPZA1/TCP1/CD47/P4HB/AIP/HNRNPDL	17										R-HSA-381070	IRE1alpha activates chaperones	14/1351	52/10704	0.00411516	0.0166818	0.0106807	PDIA6/DCTN1/HSPA5/ATP6V0D1/HYOU1/MYDGF/TPP1/PREB/EXTL3/SRPRA/SSR1/TLN1/HDGF/CTDSP2	14
HSPE1	1.24218e-204	0.239615	0.872	0.791	2.73453e-200	1.24218e-202	GO:0045956	positive regulation of calcium ion-dependent exocytosis	10/2012	19/18866	6.93552e-06	0.000124465	9.2386e-05	SYT1/STX1A/ARF1/STXBP1/CDK5R2/SYT4/CACNA1I/SCAMP5/SYT7/CDK5	10										R-HSA-69601	Ubiquitin Mediated Degradation of Phosphorylated Cdc25A	14/1351	52/10704	0.00411516	0.0166818	0.0106807	UBA52/UBB/UBC/PSMB4/RPS27A/PSMA4/PSME1/PSMD10/PSMD4/PSMD3/PSMB7/PSMB10/PSMF1/PSMD13	14
VSIG4	3.11717e-204	0.249341	0.311	0.126	6.86213e-200	3.11717e-202	GO:0150146	cell junction disassembly	10/2012	19/18866	6.93552e-06	0.000124465	9.2386e-05	C1QB/C1QA/C3/C1QC/MAP4K4/MAPRE2/CX3CL1/TREM2/IQSEC1/CDK5	10										R-HSA-69610	p53-Independent DNA Damage Response	14/1351	52/10704	0.00411516	0.0166818	0.0106807	UBA52/UBB/UBC/PSMB4/RPS27A/PSMA4/PSME1/PSMD10/PSMD4/PSMD3/PSMB7/PSMB10/PSMF1/PSMD13	14
ARHGDIA	1.70129e-203	0.223415	0.86	0.76	3.74522e-199	1.70129e-201	GO:0051235	maintenance of location	61/2012	324/18866	7.11461e-06	0.000127296	9.44878e-05	C3/FTL/SLC17A7/HSP90B1/SNCA/THY1/TMSB4X/CALR/CALM3/CAMK2D/FTH1/YWHAB/APOE/TMSB10/CALM1/CALM2/ANK2/APLNR/SLC30A3/SREBF2/CORO1A/SUN2/GJA1/CX3CL1/FKBP1A/ATP1A2/HSPA5/TXN/BSCL2/G3BP2/PAFAH1B1/CYBA/ARL2/CAPN3/SKP1/TSPO/RANGAP1/HK1/ANK3/B4GALNT1/AUP1/S100A8/MYO5A/ARHGAP21/FLNA/FBXW7/JPH4/CDS2/SLC25A23/PLA2G4C/DYSF/ARL2BP/S100A9/HNRNPU/CDK5/PRKCE/PSMD10/AKAP6/KEAP1/OSBPL8/FKBP1B	61										R-HSA-69613	p53-Independent G1/S DNA damage checkpoint	14/1351	52/10704	0.00411516	0.0166818	0.0106807	UBA52/UBB/UBC/PSMB4/RPS27A/PSMA4/PSME1/PSMD10/PSMD4/PSMD3/PSMB7/PSMB10/PSMF1/PSMD13	14
TMEM132A	1.88541e-203	0.245948	0.782	0.644	4.15055e-199	1.88541e-201	GO:0071526	semaphorin-plexin signaling pathway	15/2012	40/18866	7.479e-06	0.000133416	9.90307e-05	NCAM1/SEMA3D/ARHGDIA/SEMA4D/RAC1/SEMA4F/SEMA4A/PLXNB1/SEMA3E/FLNA/SEMA6B/PLXND1/PLXNC1/PLXNA2/PLXNA1	15										R-HSA-75815	Ubiquitin-dependent degradation of Cyclin D	14/1351	52/10704	0.00411516	0.0166818	0.0106807	UBA52/UBB/UBC/PSMB4/RPS27A/PSMA4/PSME1/PSMD10/PSMD4/PSMD3/PSMB7/PSMB10/PSMF1/PSMD13	14
DAAM2	2.10545e-203	0.269141	0.407	0.206	4.63494e-199	2.10545e-201	GO:1903052	positive regulation of proteolysis involved in cellular protein catabolic process	31/2012	127/18866	7.64647e-06	0.000135998	0.000100947	NUPR1/HSPA1A/DNAJB2/SIRT2/CLU/RACK1/DDRGK1/PTK2/ATP5IF1/BCAP31/TREM2/PTEN/HSPA1B/PLK2/ZER1/GBA/USP5/FBXW7/PSEN1/CEBPA/RBX1/DVL1/HSPBP1/DDA1/PSMD10/SGTA/MDM2/KEAP1/HERPUD1/CSNK1E/TMEM259	31										R-HSA-181430	Norepinephrine Neurotransmitter Release Cycle	7/1351	18/10704	0.0045098	0.0182271	0.0116701	SYT1/STX1A/VAMP2/STXBP1/TSPOAP1/PPFIA2/PPFIA3	7
TYROBP	2.14288e-203	0.242611	0.388	0.187	4.71734e-199	2.14288e-201	GO:0032799	low-density lipoprotein receptor particle metabolic process	11/2012	23/18866	7.88356e-06	0.000139799	0.000103768	APOE/ABCA2/AP2M1/HNRNPK/CLTC/CLTA/AP2S1/AP2B1/CNPY2/AP2A2/SCAP	11										R-HSA-975155	MyD88 dependent cascade initiated on endosome	21/1351	92/10704	0.0045824	0.0184649	0.0118223	MAPK1/MAP2K1/APP/UBA52/UBB/PPP2CB/ELK1/MAPK3/UBC/PPP2CA/SKP1/BTRC/PPP2R1A/UBE2N/JUN/RPS27A/RPS6KA2/DUSP7/MAPK14/MAP2K4/FBXW11	21
RTN4R	3.11855e-203	0.246038	0.515	0.302	6.86519e-199	3.11855e-201	GO:0051651	maintenance of location in cell	45/2012	216/18866	7.96703e-06	0.000140861	0.000104556	FTL/HSP90B1/SNCA/THY1/TMSB4X/CALR/CALM3/CAMK2D/FTH1/APOE/TMSB10/CALM1/CALM2/ANK2/APLNR/SLC30A3/CORO1A/SUN2/GJA1/CX3CL1/FKBP1A/ATP1A2/HSPA5/TXN/PAFAH1B1/CYBA/ARL2/CAPN3/SKP1/TSPO/RANGAP1/HK1/ANK3/S100A8/MYO5A/ARHGAP21/JPH4/SLC25A23/ARL2BP/S100A9/HNRNPU/CDK5/PRKCE/AKAP6/FKBP1B	45										R-HSA-168799	Neurotoxicity of clostridium toxins	5/1351	10/10704	0.00462746	0.0184649	0.0118223	SYT1/STX1A/VAMP2/SV2B/SV2A	5
KCNMB4	3.63753e-203	0.257093	0.692	0.52	8.00766e-199	3.63753e-201	GO:0050684	regulation of mRNA processing	35/2012	152/18866	8.27724e-06	0.000145261	0.000107822	QKI/HNRNPK/HNRNPA2B1/HNRNPA1/CELF5/MBNL2/PAPOLA/HSPA8/FXR1/DHX9/RBM4/NOVA2/SAFB/RBM10/DDX5/NCL/SRSF6/CELF3/TRA2A/DYRK1A/RBM23/MBNL1/HSF1/PCBP4/CELF2/CELF4/SRSF1/HNRNPU/SAFB2/RNPS1/NUDT21/SUPT5H/NELFE/SF1/PABPN1	35										R-HSA-2465910	MASTL Facilitates Mitotic Progression	5/1351	10/10704	0.00462746	0.0184649	0.0118223	ARPP19/PPP2CB/ENSA/PPP2CA/PPP2R1A	5
DCTN1	3.16741e-202	0.21968	0.92	0.845	6.97273e-198	3.16741e-200	GO:0014047	glutamate secretion	16/2012	45/18866	8.31313e-06	0.000145261	0.000107822	SLC17A7/SYT1/STX1A/GJA1/GLS/VAMP2/STXBP1/APBA1/SYT4/ADORA1/TSPOAP1/NF1/HRH3/PPFIA2/RAB3GAP1/PPFIA3	16										R-HSA-8875656	MET receptor recycling	5/1351	10/10704	0.00462746	0.0184649	0.0118223	GRB2/CRKL/CRK/RAB4B/RAB4A	5
PRRT1	6.37096e-202	0.249738	0.785	0.654	1.4025e-197	6.37096e-200	GO:0072583	clathrin-dependent endocytosis	16/2012	45/18866	8.31313e-06	0.000145261	0.000107822	SH3GL2/DNAJC6/CANX/AP2M1/SNAP91/CLTC/SH3GL3/CLTA/AP2S1/PICALM/AP2B1/PIP5K1C/CLTB/SGIP1/AP2A2/DNM2	16										R-HSA-2173789	TGF-beta receptor signaling activates SMADs	10/1351	32/10704	0.00463661	0.0184649	0.0118223	UBA52/UBB/XPO1/FKBP1A/UBC/PPP1CA/PPP1CC/PPP1CB/NEDD4L/RPS27A	10
NCAM2	7.54886e-202	0.262643	0.683	0.517	1.66181e-197	7.54886e-200	GO:1904646	cellular response to amyloid-beta	16/2012	45/18866	8.31313e-06	0.000145261	0.000107822	APP/ATP1A3/PRNP/GJA1/CACNA2D1/BACE1/TREM2/BCL2L2/CACNB1/GRM5/PSEN1/LGMN/PARP1/LRP1/CDK5/SNX6	16										R-HSA-6806003	Regulation of TP53 Expression and Degradation	11/1351	37/10704	0.00466046	0.0185056	0.0118484	UBA52/UBB/SGK1/PPP2CB/UBC/PPP2CA/PPP2R1A/RPS27A/USP7/MDM2/PPP2R5C	11
ARF3	1.9568e-201	0.188841	0.988	0.972	4.3077e-197	1.9568e-199	GO:0006644	phospholipid metabolic process	79/2012	455/18866	8.49919e-06	0.000148079	0.000109914	APOC1/PLPPR4/PIP4K2A/CPNE6/FABP3/SLC44A1/SERINC1/ABCA2/ENPP2/ARF1/PLAAT4/MBOAT7/ARF3/DBI/CD81/APOC2/PIP4K2B/PLPPR2/DGKZ/PAFAH1B1/PTK2/AGPAT1/PLAAT3/AGAP2/SERINC3/PGAP1/PI4KA/CSF1R/CPNE7/PRKCD/TTC7B/SYNJ2/CDC42/PLPP2/PTEN/ABHD6/PTDSS1/AGPAT4/PLPPR3/PIK3R2/HADHB/PIP5K1C/ITPKB/GNPAT/EFR3A/SYNJ1/CDS2/IP6K2/EFR3B/PLEKHA2/PLA2G4C/FAR1/SPTLC2/SELENOI/DGKG/SMPD1/PDXP/GDE1/CCKBR/VAC14/INPP4A/PIGT/CPNE3/MB…	79										R-HSA-983168	Antigen processing: Ubiquitination & Proteasome degradation	55/1351	309/10704	0.0048481	0.0191945	0.0122895	UBA52/UBB/FBXL16/RNF130/UBC/PJA2/SKP1/CDC34/UBA1/BTRC/UBE2E2/ELOB/PSMB4/LNPEP/FBXW7/TRIM36/UBE2R2/UBE2N/NEDD4L/RPS27A/UBE2Z/FBXO41/UBE2Q1/UBE2K/RBX1/RLIM/TRIP12/UBE2W/UBE2B/ZNRF1/PSMA4/PSME1/KBTBD6/UBE4A/WSB1/FBXL5/FBXO11/FBXO44/PSMD10/FBXW4/FBXL3/LMO7/FBXW11/PSMD4/KEAP1/BTBD1/CUL3/PSMD3/PSMB7/UBE2L6/PSMB10/PSMF1/RNF220/PSMD13/UBE2D2	55
GLS	2.11416e-201	0.22495	0.909	0.825	4.65412e-197	2.11416e-199	GO:0010923	negative regulation of phosphatase activity	27/2012	104/18866	8.62452e-06	0.000149826	0.000111211	PPP1R14A/ARPP19/FKBP1A/SEMA4D/SPRED1/PHACTR3/ARFGEF3/ENSA/PTPA/WNK1/FARP1/BAG4/ELFN2/SET/CHP1/DLG2/SYTL2/SLC7A14/PPP4R4/PPP1R10/CABIN1/PPP1R11/CD2BP2/RIMBP2/RBM26/FKBP1B/PPP1R37	27										R-HSA-109606	Intrinsic Pathway for Apoptosis	14/1351	53/10704	0.00495713	0.0195691	0.0125293	YWHAZ/YWHAH/MAPK1/YWHAB/YWHAG/YWHAE/SEPTIN4/DYNLL1/YWHAQ/MAPK3/DYNLL2/PPP3R1/NMT1/BCL2L1	14
TMEM158	7.215e-201	0.232495	0.397	0.197	1.58831e-196	7.215e-199	GO:0070671	response to interleukin-12	17/2012	50/18866	8.73602e-06	0.000151323	0.000112322	SOD2/MIF/SOD1/CFL1/ARF1/PPIA/RPLP0/HNRNPA2B1/SIRPA/CDC42/HSPA9/CAPZA1/TCP1/CD47/P4HB/AIP/HNRNPDL	17										R-HSA-168181	Toll Like Receptor 7/8 (TLR7/8) Cascade	21/1351	93/10704	0.00523301	0.0205983	0.0131883	MAPK1/MAP2K1/APP/UBA52/UBB/PPP2CB/ELK1/MAPK3/UBC/PPP2CA/SKP1/BTRC/PPP2R1A/UBE2N/JUN/RPS27A/RPS6KA2/DUSP7/MAPK14/MAP2K4/FBXW11	21
NUDT4	1.26465e-200	0.262052	0.737	0.588	2.784e-196	1.26465e-198	GO:0072655	establishment of protein localization to mitochondrion	33/2012	140/18866	8.7842e-06	0.000151341	0.000112336	HSP90AA1/YWHAZ/YWHAH/CALM3/DNAJA1/YWHAB/YWHAG/YWHAE/SREBF2/HSPD1/YWHAQ/MAPT/HSPA4/ATP5IF1/BAG4/TSPO/HK1/PDCD5/GDAP1/RHOU/TOMM34/UBL5/FBXW7/BAP1/TOMM70/TOMM22/TOMM20/PPP3R1/SREBF1/AIP/HAX1/NMT1/BNIP3L	33										R-HSA-166166	MyD88-independent TLR4 cascade	22/1351	99/10704	0.00529456	0.0206467	0.0132193	MAPK1/MAP2K1/APP/UBA52/UBB/PPP2CB/ELK1/MAPK3/UBC/PPP2CA/SKP1/BTRC/PPP2R1A/UBE2N/JUN/RPS27A/RPS6KA2/DUSP7/MAPK14/MAP2K4/FBXW11/UBE2D2	22
ATP8A1	3.57239e-200	0.246392	0.78	0.639	7.86425e-196	3.57239e-198	GO:0032781	positive regulation of ATPase activity	18/2012	55/18866	8.80456e-06	0.000151341	0.000112336	DNAJA1/DNAJB2/DYNLL1/ATP1B1/ATP1B2/PFN1/DNAJB1/DYNLL2/NAPA/DNAL4/HSPA2/DHX9/DNAJB4/AHSA1/DNAJB6/HNRNPU/RAB4A/TPM1	18										R-HSA-937061	TRIF(TICAM1)-mediated TLR4 signaling	22/1351	99/10704	0.00529456	0.0206467	0.0132193	MAPK1/MAP2K1/APP/UBA52/UBB/PPP2CB/ELK1/MAPK3/UBC/PPP2CA/SKP1/BTRC/PPP2R1A/UBE2N/JUN/RPS27A/RPS6KA2/DUSP7/MAPK14/MAP2K4/FBXW11/UBE2D2	22
SNAP91	7.40178e-200	0.233316	0.884	0.784	1.62943e-195	7.40178e-198	GO:0032436	positive regulation of proteasomal ubiquitin-dependent protein catabolic process	24/2012	87/18866	8.81306e-06	0.000151341	0.000112336	HSPA1A/DNAJB2/SIRT2/CLU/RACK1/DDRGK1/BCAP31/HSPA1B/PLK2/ZER1/GBA/USP5/PSEN1/CEBPA/RBX1/DVL1/HSPBP1/DDA1/PSMD10/SGTA/MDM2/KEAP1/HERPUD1/CSNK1E	24										R-HSA-380259	Loss of Nlp from mitotic centrosomes	17/1351	70/10704	0.00530611	0.0206467	0.0132193	TUBA1A/HSP90AA1/TUBB4A/TUBB/YWHAG/YWHAE/DYNLL1/DCTN1/PAFAH1B1/CCP110/SSNA1/DYNC1H1/PPP2R1A/TUBA4A/ACTR1A/CLASP1/CSNK1E	17
NKAIN2	1.25423e-199	0.227676	0.333	0.145	2.76106e-195	1.25423e-197	GO:0016482	cytosolic transport	37/2012	165/18866	8.84364e-06	0.000151431	0.000112403	BAIAP3/MAPK1/MAP2K1/SNX3/CORO1A/MAP2/RAB6B/DCTN1/KIF1A/KIF1B/RAB7A/MAPK3/CLTC/KIF1C/RAB21/LAMP1/DENND5A/SORT1/SYT4/RAB6A/PREPL/TBC1D14/RDX/YKT6/EHD3/SNX1/AKTIP/SYT7/RAB5A/EPS15/TANC2/ACTR2/PPFIA2/SNX6/KIF5B/STX16/AP1S1	37										R-HSA-380284	Loss of proteins required for interphase microtubule organization from the centrosome	17/1351	70/10704	0.00530611	0.0206467	0.0132193	TUBA1A/HSP90AA1/TUBB4A/TUBB/YWHAG/YWHAE/DYNLL1/DCTN1/PAFAH1B1/CCP110/SSNA1/DYNC1H1/PPP2R1A/TUBA4A/ACTR1A/CLASP1/CSNK1E	17
MARCKSL1	1.7353e-199	0.269774	0.868	0.781	3.82008e-195	1.7353e-197	GO:1901800	positive regulation of proteasomal protein catabolic process	28/2012	110/18866	8.89319e-06	0.000151845	0.000112709	NUPR1/HSPA1A/DNAJB2/SIRT2/CLU/RACK1/DDRGK1/BCAP31/TREM2/HSPA1B/PLK2/ZER1/GBA/USP5/FBXW7/PSEN1/CEBPA/RBX1/DVL1/HSPBP1/DDA1/PSMD10/SGTA/MDM2/KEAP1/HERPUD1/CSNK1E/TMEM259	28										R-HSA-2173795	Downregulation of SMAD2/3:SMAD4 transcriptional activity	8/1351	23/10704	0.00536872	0.0208306	0.013337	UBA52/UBB/UBC/USP9X/NEDD4L/RPS27A/NCOR2/PARP1	8
SORBS2	2.29688e-199	0.236572	0.462	0.256	5.05635e-195	2.29688e-197	GO:1903828	negative regulation of cellular protein localization	29/2012	116/18866	9.05045e-06	0.00015409	0.000114376	APOD/DNAJA1/GDI1/GPM6B/AP2M1/MAPT/TXN/TP53INP2/CLTC/BAG4/PKIA/RANGAP1/RIPOR2/PICALM/CHP1/TMEM59/TMBIM1/DMTN/DCLK1/NEDD4L/UFM1/PID1/NF1/DCLK2/LZTS2/CDK5/BCL2L1/SVIP/NSFL1C	29										R-HSA-5387390	Hh mutants abrogate ligand secretion	15/1351	59/10704	0.00545529	0.0210463	0.0134751	UBA52/UBB/UBC/SEL1L/PSMB4/RPS27A/PSMA4/PSME1/PSMD10/PSMD4/PSMD3/PSMB7/PSMB10/PSMF1/PSMD13	15
NEUROD2	2.01924e-198	0.250618	0.592	0.387	4.44515e-194	2.01924e-196	GO:0061684	chaperone-mediated autophagy	9/2012	16/18866	9.96658e-06	0.000167916	0.000124638	GFAP/HSP90AA1/SNCA/EEF1A1/LAMP2/CLU/EEF1A2/HSPA8/CTSA	9										R-HSA-983189	Kinesins	15/1351	59/10704	0.00545529	0.0210463	0.0134751	TUBA1A/TUBA1B/TUBB4A/TUBB2A/KIF3C/TUBB3/KIF1A/KIF1B/KLC1/KIF1C/KIF21B/KIFAP3/TUBA4A/KIF5B/TUBB2B	15
CRELD1	3.05204e-198	0.252298	0.562	0.353	6.71877e-194	3.05204e-196	GO:0097091	synaptic vesicle clustering	9/2012	16/18866	9.96658e-06	0.000167916	0.000124638	SYN2/SYN1/PCDH17/PTEN/NLGN2/CTNNB1/NLGN3/PCLO/CDH2	9										R-HSA-380270	Recruitment of mitotic centrosome proteins and complexes	19/1351	82/10704	0.0057423	0.0220284	0.0141039	TUBA1A/HSP90AA1/TUBB4A/TUBB/YWHAG/YWHAE/DYNLL1/DCTN1/PAFAH1B1/MZT2A/CCP110/SSNA1/DYNC1H1/PPP2R1A/TUBA4A/ACTR1A/MZT2B/CLASP1/CSNK1E	19
RPS15	2.70734e-197	0.167112	1	0.999	5.95993e-193	2.70734e-195	GO:0021954	central nervous system neuron development	23/2012	82/18866	9.97492e-06	0.000167916	0.000124638	HSP90AA1/NPY/CNTN2/HSP90AB1/UBB/MAP2/MAPT/PAFAH1B1/PTK2/PTEN/ZEB2/FEZF2/ZMIZ1/CHRNB2/CRKL/DCLK1/NFIB/FGFR2/DCLK2/CRK/ARHGAP35/CDK5/HPRT1	23										R-HSA-380287	Centrosome maturation	19/1351	82/10704	0.0057423	0.0220284	0.0141039	TUBA1A/HSP90AA1/TUBB4A/TUBB/YWHAG/YWHAE/DYNLL1/DCTN1/PAFAH1B1/MZT2A/CCP110/SSNA1/DYNC1H1/PPP2R1A/TUBA4A/ACTR1A/MZT2B/CLASP1/CSNK1E	19
CARNS1	7.35774e-196	0.282234	0.321	0.139	1.61973e-191	7.35774e-194	GO:1903533	regulation of protein targeting	23/2012	82/18866	9.97492e-06	0.000167916	0.000124638	PRNP/GDI1/SREBF2/HPCA/ITGB2/PAK1/CDK5R1/HRAS/ATP5IF1/BAG4/NUCB1/ANK3/PDCD5/CHP1/RHOU/DMTN/UBL5/FBXW7/BAP1/SREBF1/CDK5/HAX1/BNIP3L	23										R-HSA-9619665	EGR2 and SOX10-mediated initiation of Schwann cell myelination	9/1351	28/10704	0.0057956	0.0221079	0.0141548	MBP/SCD5/MAG/SREBF2/SOX10/HMGCR/CYP51A1/POU3F2/HDAC2	9
LARGE1	1.27948e-195	0.228423	0.435	0.232	2.81665e-191	1.27948e-193	GO:0150116	regulation of cell-substrate junction organization	20/2012	66/18866	1.05697e-05	0.000177428	0.000131699	APOD/MAP4K4/THY1/MAPRE2/S100A10/GPM6B/RAC1/PTK2/FAM107A/CLASP2/VEGFA/PTEN/DMTN/LIMCH1/IQSEC1/RHOA/CLASP1/DUSP22/LRP1/PTPRJ	20										R-HSA-9683701	Translation of structural proteins	9/1351	28/10704	0.0057956	0.0221079	0.0141548	CANX/UBA52/UBB/UBC/PRKCSH/RPS27A/ST6GAL1/GANAB/UBE2I	9
PPP2CB	3.13388e-195	0.217823	0.934	0.873	6.89892e-191	3.13388e-193	GO:0006979	response to oxidative stress	79/2012	458/18866	1.08693e-05	0.000181946	0.000135053	CRYAB/HSPB1/SOD2/HSPA1A/APOD/SNCA/MAPK1/LDHA/APP/APOE/SOD1/PSAP/AIF1/PRNP/HSPD1/MGST1/AQP1/ATP2A2/PPP2CB/MAP1LC3A/GPR37/SIRT2/MAPT/RACK1/SIRPA/TXN/RPS3/AGAP3/CYBA/MAPK3/MGAT3/RGS14/DHCR24/ARL6IP5/SELENOP/ATF4/PTPRN/PRKCD/EEF2/NQO1/SLC23A2/PRDX1/HSPA1B/CPEB2/GUCY1B1/CTNNB1/BNIP3/HMOX2/GSKIP/SFPQ/FBXW7/STX4/JUN/PSEN1/HSF1/ETV5/LONP1/NCOA7/STAU1/PARP1/NFE2L1/GSTP1/KPNA4/TXN2/P4HB/CRK/MPV17/STAT1/MDM…	79										R-HSA-5696394	DNA Damage Recognition in GG-NER	11/1351	38/10704	0.0058263	0.0221628	0.01419	UBA52/ACTB/UBB/RAD23B/UBC/COPS7A/YY1/RPS27A/RBX1/PARP1/COPS8	11
PLEKHB1	3.78377e-195	0.265404	0.959	0.92	8.3296e-191	3.78377e-193	GO:0051489	regulation of filopodium assembly	16/2012	46/18866	1.14913e-05	0.000191434	0.000142095	GPM6A/DPYSL3/FSCN1/GAP43/CAPZB/PRKCD/FXR1/CDC42/RIPOR2/PALM/DMTN/MIEN1/NEURL1/ARAP1/PPP1R16B/RAB5A	16										R-HSA-5358346	Hedgehog ligand biogenesis	16/1351	65/10704	0.00585914	0.0222254	0.0142301	UBA52/UBB/UBC/SEL1L/PSMB4/RPS27A/PSMA4/PSME1/P4HB/PSMD10/PSMD4/PSMD3/PSMB7/PSMB10/PSMF1/PSMD13	16
ATP5ME	9.81081e-195	0.194863	0.989	0.981	2.15975e-190	9.81081e-193	GO:0006650	glycerophospholipid metabolic process	63/2012	343/18866	1.15001e-05	0.000191434	0.000142095	APOC1/PIP4K2A/CPNE6/FABP3/SLC44A1/SERINC1/ENPP2/ARF1/PLAAT4/MBOAT7/ARF3/DBI/PIP4K2B/DGKZ/PAFAH1B1/AGPAT1/PLAAT3/AGAP2/SERINC3/PGAP1/PI4KA/CSF1R/CPNE7/TTC7B/SYNJ2/PTEN/ABHD6/PTDSS1/AGPAT4/PIK3R2/HADHB/PIP5K1C/ITPKB/GNPAT/EFR3A/SYNJ1/CDS2/IP6K2/EFR3B/PLEKHA2/PLA2G4C/FAR1/SELENOI/DGKG/PDXP/GDE1/VAC14/INPP4A/PIGT/CPNE3/MBOAT2/SLC27A1/RAB5A/CSNK2A1/RAB4A/MTMR6/OSBPL8/SMG1/SACM1L/LPGAT1/SBF1/PNPLA6/CDI…	63										R-HSA-1980145	Signaling by NOTCH2	10/1351	33/10704	0.00591454	0.0223731	0.0143246	UBA52/UBB/CNTN1/UBC/NEURL1/RBPJ/RPS27A/PSEN1/NCSTN/ADAM10	10
NNAT	1.04619e-194	0.236449	0.718	0.511	2.30309e-190	1.04619e-192	GO:0043113	receptor clustering	18/2012	56/18866	1.16904e-05	0.000194061	0.000144045	THY1/APOE/ITGB2/CD81/NRXN2/SSNA1/DLG2/DLG1/FLNA/CRKL/LRRC7/GLRB/ETV5/SHISA7/DVL1/SYNGAP1/CDK5/CDH2	18										R-HSA-983231	Factors involved in megakaryocyte development and platelet production	33/1351	168/10704	0.00605123	0.0228266	0.0146149	TUBA1A/TUBA1B/TUBB4A/TUBB2A/ACTB/PRKAR1A/KIF3C/TUBB3/KIF1A/KIF1B/CAPZB/RAC1/KLC1/KIF1C/DOCK9/PRKACB/KIF21B/CDC42/DOCK5/CAPZA1/PRKAR1B/KIFAP3/TUBA4A/DOCK4/SH2B1/ITPK1/MAFG/EHD3/CDK5/RAB5A/HDAC2/KIF5B/TUBB2B	33
MYL6	1.06961e-194	0.20384	0.972	0.947	2.35464e-190	1.06961e-192	GO:0035637	multicellular organismal signaling	43/2012	206/18866	1.19271e-05	0.000197441	0.000146554	SCN3B/ATP2B4/FXYD6/CALM3/CAMK2D/CALM1/YWHAE/SOD1/CALM2/ANK2/BIN1/MAG/ATP1A3/SLC8A2/ATP1B1/GJA1/ATP2A2/ATP1B2/ATP1A2/KCNMB4/CACNG3/JAM3/NRCAM/NFASC/PAFAH1B1/CACNA2D1/KCNK1/SLC4A3/TNR/STIM1/ANK3/SCN2B/CACNB1/FLNA/GBA/CACNA1I/KCNIP3/ATP2B3/CNTNAP1/EHD3/ATP2B1/KCNIP2/FKBP1B	43										R-HSA-1236382	Constitutive Signaling by Ligand-Responsive EGFR Cancer Variants	7/1351	19/10704	0.00637365	0.0238441	0.0152664	HSP90AA1/UBA52/UBB/HRAS/UBC/GRB2/RPS27A	7
PDE2A	9.87762e-194	0.232484	0.854	0.747	2.17446e-189	9.87762e-192	GO:0022406	membrane docking	39/2012	180/18866	1.20963e-05	0.000199689	0.000148223	TUBA1A/HSP90AA1/TUBB4A/TUBB/NSF/YWHAG/SYT1/YWHAE/STX1A/SNX3/DYNLL1/DCTN1/NDRG4/STXBP1/RAB7A/RAB3B/PAFAH1B1/RAB3C/CHP1/STX7/CCP110/SSNA1/DYNC1H1/PPP2R1A/SYTL2/RAB8B/STX4/TUBA4A/ACTR1A/CLASP1/YKT6/STXBP3/RAB15/PACS2/PPFIA3/VAPB/STX16/STX12/CSNK1E	39										R-HSA-5637815	Signaling by Ligand-Responsive EGFR Variants in Cancer	7/1351	19/10704	0.00637365	0.0238441	0.0152664	HSP90AA1/UBA52/UBB/HRAS/UBC/GRB2/RPS27A	7
ADGRG1	1.08844e-193	0.238637	0.814	0.692	2.39608e-189	1.08844e-191	GO:0045807	positive regulation of endocytosis	26/2012	100/18866	1.2218e-05	0.000201142	0.000149301	TF/C3/SNCA/APOE/B2M/ARF1/HNRNPK/CD63/DNM1/CLU/CALY/CLIP3/RAB21/ARRB2/TREM2/CDC42/VEGFA/AP2B1/APLN/PPT1/NEDD4L/CD151/SGIP1/LRP1/FLOT1/DNM2	26										R-HSA-8963898	Plasma lipoprotein assembly	7/1351	19/10704	0.00637365	0.0238441	0.0152664	APOC1/APOE/APOC2/PRKACB/P4HB/SAR1B/A2M	7
MAT2A	2.91438e-193	0.248859	0.639	0.447	6.41571e-189	2.91438e-191	GO:0048708	astrocyte differentiation	23/2012	83/18866	1.24198e-05	0.000203529	0.000151073	PLP1/C1QA/MAPK1/CNTN2/MAP2K1/APP/BIN1/MAG/ID4/MAPT/MAPK3/SOX8/GRN/TREM2/IFNGR1/S100A8/NR1D1/PSEN1/S100A9/NF1/LRP1/POU3F2/VIM	23										R-HSA-187577	SCF(Skp2)-mediated degradation of p27/p21	15/1351	60/10704	0.00644541	0.0240464	0.0153959	UBA52/UBB/UBC/SKP1/PSMB4/RPS27A/PSMA4/PSME1/PSMD10/PSMD4/PSMD3/PSMB7/PSMB10/PSMF1/PSMD13	15
STIP1	5.22049e-193	0.234741	0.535	0.326	1.14924e-188	5.22049e-191	GO:0061572	actin filament bundle organization	36/2012	161/18866	1.24311e-05	0.000203529	0.000151073	HSP90B1/STMN1/AIF1/S100A10/LPAR1/SHTN1/CX3CL1/PAK1/TMEFF2/DPYSL3/FSCN1/SYNPO/PFN1/MARCKS/RAC1/FAM107A/BAG4/EVL/BAIAP2/CLASP2/CDC42/AIF1L/DMTN/LIMCH1/FAM171A1/FLNA/CD47/ARAP1/PDXP/RDX/RHOA/CLASP1/KCTD13/CUL3/TPM1/RHOC	36										R-HSA-166058	MyD88:MAL(TIRAP) cascade initiated on plasma membrane	21/1351	95/10704	0.00676345	0.025095	0.0160673	MAPK1/MAP2K1/APP/UBA52/UBB/PPP2CB/ELK1/MAPK3/UBC/PPP2CA/SKP1/BTRC/PPP2R1A/UBE2N/JUN/RPS27A/RPS6KA2/DUSP7/MAPK14/MAP2K4/FBXW11	21
TOLLIP	1.32084e-191	0.225379	0.929	0.845	2.90771e-187	1.32084e-189	GO:0021987	cerebral cortex development	29/2012	118/18866	1.29046e-05	0.000210589	0.000156314	NPY/YWHAE/RTN4/SUN2/MBOAT7/ADGRG1/NEFL/CDK5R1/PAFAH1B1/CDK5R2/DIXDC1/ZMIZ1/BMERB1/CTNNB1/BNIP3/FLNA/CRKL/GRIN1/PSEN1/WDR47/RHOA/NF1/SRGAP2/TACC1/LRP1/CRK/POU3F2/CDK5/CDH2	29										R-HSA-168188	Toll Like Receptor TLR6:TLR2 Cascade	21/1351	95/10704	0.00676345	0.025095	0.0160673	MAPK1/MAP2K1/APP/UBA52/UBB/PPP2CB/ELK1/MAPK3/UBC/PPP2CA/SKP1/BTRC/PPP2R1A/UBE2N/JUN/RPS27A/RPS6KA2/DUSP7/MAPK14/MAP2K4/FBXW11	21
RPL31	2.51196e-191	0.156376	0.999	0.999	5.52984e-187	2.51196e-189	GO:0031115	negative regulation of microtubule polymerization	8/2012	13/18866	1.2968e-05	0.000210589	0.000156314	SNCA/STMN1/TUBB4A/MAP2/STMN2/CLIP3/FKBP4/DYRK1A	8										R-HSA-69563	p53-Dependent G1 DNA Damage Response	16/1351	66/10704	0.00685053	0.02528	0.0161858	UBA52/UBB/UBC/PSMB4/RPS27A/PCBP4/PSMA4/PSME1/PSMD10/MDM2/PSMD4/PSMD3/PSMB7/PSMB10/PSMF1/PSMD13	16
DPYSL3	3.01959e-191	0.23688	0.568	0.361	6.64732e-187	3.01959e-189	GO:0099640	axo-dendritic protein transport	8/2012	13/18866	1.2968e-05	0.000210589	0.000156314	HSPB1/RAB27B/MAPK8IP3/KIF5C/DLG2/SFPQ/HNRNPU/KIF5B	8										R-HSA-69580	p53-Dependent G1/S DNA damage checkpoint	16/1351	66/10704	0.00685053	0.02528	0.0161858	UBA52/UBB/UBC/PSMB4/RPS27A/PCBP4/PSMA4/PSME1/PSMD10/MDM2/PSMD4/PSMD3/PSMB7/PSMB10/PSMF1/PSMD13	16
GALNT16	6.91405e-191	0.235279	0.518	0.313	1.52206e-186	6.91405e-189	GO:0045926	negative regulation of growth	50/2012	254/18866	1.34577e-05	0.000217949	0.000161776	CRYAB/SPP1/HSPA1A/DNAJB2/RTN4/MAG/MEG3/MAP2/APBB1/GJA1/SEMA3D/PAK1/RTN4R/SEMA4D/ENO1/SLIT3/RACK1/CDK5R1/PTK2/CCDC85B/PHB/DACT3/IGFBP5/ADIPOR1/PPP2CA/BST2/TNR/SEMA4F/SEMA4A/SEMA3E/PTEN/HSPA1B/RBP4/RGS4/PPP2R1A/SPART/BCL11A/ADIPOR2/SEMA6B/PSRC1/IFRD1/YY1/PPT1/IP6K2/LGMN/EI24/PTPRJ/CDK5/BMPR2/ACVR1B	50										R-HSA-166208	mTORC1-mediated signalling	8/1351	24/10704	0.0071776	0.0264151	0.0169126	YWHAB/RPS6/FKBP1A/EIF4G1/LAMTOR2/EIF4B/LAMTOR4/EIF4E	8
SEMA4D	1.10424e-190	0.245009	0.424	0.227	2.43086e-186	1.10424e-188	GO:0046578	regulation of Ras protein signal transduction	41/2012	194/18866	1.38105e-05	0.000223057	0.000165568	MAP4K4/TIMP2/STMN1/PSD3/STMN3/MAPRE2/APOE/LPAR1/ARHGDIA/RTN4R/PPP2CB/ADGRG1/ERBIN/ARFGEF3/RAC1/HRAS/ARHGDIB/CDC42SE2/RASGRP1/RIPOR2/GRB2/RASAL1/IQSEC1/IQSEC2/SQSTM1/ITPKB/CRKL/PSD2/CADM4/LZTR1/ARHGEF2/RDX/NF1/SYNGAP1/KCTD13/CRK/ARHGAP35/FLOT1/CUL3/CYTH1/DNM2	41										R-HSA-2691230	Signaling by NOTCH1 HD Domain Mutants in Cancer	6/1351	15/10704	0.00726119	0.0265787	0.0170173	UBA52/UBB/UBC/NEURL1/RPS27A/ADAM10	6
SEZ6L2	3.18359e-190	0.219516	0.876	0.78	7.00834e-186	3.18359e-188	GO:0099612	protein localization to axon	7/2012	10/18866	1.39239e-05	0.000224284	0.000166479	CNTN2/UGT8/NFASC/MAL/ANK3/CNTNAP1/COPA	7										R-HSA-2691232	Constitutive Signaling by NOTCH1 HD Domain Mutants	6/1351	15/10704	0.00726119	0.0265787	0.0170173	UBA52/UBB/UBC/NEURL1/RPS27A/ADAM10	6
BOK	6.56883e-190	0.236299	0.318	0.137	1.44606e-185	6.56883e-188	GO:1904589	regulation of protein import	19/2012	62/18866	1.46026e-05	0.000234583	0.000174124	APOD/MAPK1/HSP90AB1/HSPA8/PRKCD/PKIA/PDCD5/CHP1/RAN/FLNA/PIK3R2/HCLS1/PSEN1/NUTF2/UFM1/NF1/TARDBP/MAPK14/IPO5	19										R-HSA-187687	Signalling to ERKs	10/1351	34/10704	0.00745087	0.0271268	0.0173682	MAPK1/MAP2K1/YWHAB/MAPK3/HRAS/GRB2/CRKL/CRK/MAPK14/RAP1A	10
RPS14	3.3191e-189	0.17008	0.998	0.997	7.30667e-185	3.3191e-187	GO:0070482	response to oxygen levels	70/2012	396/18866	1.4815e-05	0.000237258	0.000176109	CRYAB/HSP90B1/HIPK2/LDHA/UBA52/UBB/LPAR1/DDIT4/HSPD1/ATP1B1/AQP1/ATP6AP1/PKM/PAK1/SIRT2/ENO1/CD24/CYBA/DDAH1/ATP6V1A/UBC/B3GAT1/OPA1/ATP6V0D1/ATF4/NDRG1/PDK3/GNB1/VEGFA/ELOB/PTEN/HYOU1/CPEB2/CHRNB2/PSMB4/BNIP3/HMOX2/ADORA1/PIN1/RBPJ/RPS27A/PLOD1/HSF1/RBX1/LONP1/TMBIM6/RHOA/NF1/EGLN2/PSMA4/PSME1/TXN2/P4HB/PRKCE/AK4/ARNT2/SCAP/AHCY/PSMD10/MDM2/HDAC2/PSMD4/ALAD/PSMD3/PSMB7/PSMB10/PSMF1/BNIP3L/PSMD13…	70										R-HSA-70263	Gluconeogenesis	10/1351	34/10704	0.00745087	0.0271268	0.0173682	TPI1/GAPDH/ENO1/PGAM2/GPI/ENO2/PGAM1/SLC25A1/MDH2/SLC25A11	10
HSPA5	5.16404e-189	0.280868	0.74	0.647	1.13681e-184	5.16404e-187	GO:0062197	cellular response to chemical stress	65/2012	360/18866	1.48485e-05	0.000237258	0.000176109	HSPB1/SOD2/HSPA1A/SNCA/MAPK1/DNAJA1/SOD1/PSAP/AIF1/MGST1/EFHD1/AQP1/ATP2A2/MAP1LC3A/GPR37/SIRT2/MAPT/RACK1/SIRPA/TXN/RPS3/AGAP3/CYBA/MAPK3/MGAT3/CAPN3/ARL6IP5/ATF4/PRKCD/TSPO/NQO1/PRDX1/HSPA1B/CPEB2/GUCY1B1/CTNNB1/BNIP3/GSKIP/SFPQ/FBXW7/STX4/JUN/STK39/SLC25A23/DYSF/HSF1/ETV5/LONP1/ARHGEF2/NCOA7/STAU1/PARP1/NFE2L1/GSTP1/P4HB/CRK/MPV17/LRRC8D/MDM2/HDAC2/KEAP1/VKORC1L1/TPM1/PTPRK/DNM2	65										R-HSA-1236977	Endosomal/Vacuolar pathway	5/1351	11/10704	0.00760949	0.0274832	0.0175964	B2M/HLA-B/HLA-A/CTSS/LNPEP	5
MOG	6.7831e-189	0.228066	0.24	0.08	1.49323e-184	6.7831e-187	GO:0043266	regulation of potassium ion transport	27/2012	107/18866	1.51677e-05	0.000241648	0.000179367	YWHAE/ANK2/BIN1/PRNP/ATP1B1/ATP1B2/CD63/KCNG1/VAMP2/KCNAB2/WNK1/ATF4/TREM2/ANK3/PTEN/RGS4/DLG1/FLNA/ADORA1/KCNIP3/STK39/NEDD4L/DPP6/KCNIP2/AKAP6/KIF5B/DNM2	27										R-HSA-8875555	MET activates RAP1 and RAC1	5/1351	11/10704	0.00760949	0.0274832	0.0175964	RAC1/GRB2/CRKL/CRK/RAP1A	5
HLA-A	7.73888e-189	0.241444	0.833	0.723	1.70364e-184	7.73888e-187	GO:0034605	cellular response to heat	30/2012	125/18866	1.52041e-05	0.000241648	0.000179367	CRYAB/HSP90AA1/HSPA1A/MAPK1/HSP90AB1/HSPH1/CAMK2D/PTGES3/YWHAE/HSPD1/ATP2A2/MAPT/MAPK3/DNAJB1/FGF1/HSPA8/BAG4/CHORDC1/HSBP1/HSPA1B/FKBP4/DNAJC7/HSF1/DNAJB6/CAMK2B/NF1/HSPB8/ARPP21/SEH1L/HDAC2	30										R-HSA-9664873	Pexophagy	5/1351	11/10704	0.00760949	0.0274832	0.0175964	UBA52/UBB/UBC/SQSTM1/RPS27A	5
MAPRE3	1.96351e-188	0.216445	0.915	0.829	4.32246e-184	1.96351e-186	GO:0140029	exocytic process	23/2012	84/18866	1.53941e-05	0.00024402	0.000181128	SNCA/NAPB/SYT1/STX1A/FCER1G/STXBP1/RAB3B/SV2A/NAPA/RAB3C/ERC2/CPLX3/DMTN/SYTL2/RAB8B/STX4/SYNJ1/PSEN1/YKT6/STXBP3/SYT7/RAB15/PPFIA3	23										R-HSA-168138	Toll Like Receptor 9 (TLR9) Cascade	21/1351	96/10704	0.0076558	0.0275072	0.0176118	MAPK1/MAP2K1/APP/UBA52/UBB/PPP2CB/ELK1/MAPK3/UBC/PPP2CA/SKP1/BTRC/PPP2R1A/UBE2N/JUN/RPS27A/RPS6KA2/DUSP7/MAPK14/MAP2K4/FBXW11	21
ZBTB18	3.74672e-188	0.243742	0.781	0.647	8.24802e-184	3.74672e-186	GO:1903747	regulation of establishment of protein localization to mitochondrion	21/2012	73/18866	1.56782e-05	0.000247864	0.000183982	YWHAZ/YWHAH/DNAJA1/YWHAB/YWHAG/YWHAE/SREBF2/YWHAQ/MAPT/ATP5IF1/BAG4/PDCD5/RHOU/UBL5/FBXW7/BAP1/PPP3R1/SREBF1/HAX1/NMT1/BNIP3L	21										R-HSA-381038	XBP1(S) activates chaperone genes	13/1351	50/10704	0.00767691	0.0275072	0.0176118	PDIA6/DCTN1/ATP6V0D1/HYOU1/MYDGF/TPP1/PREB/EXTL3/SRPRA/SSR1/TLN1/HDGF/CTDSP2	13
RNASET2	6.46586e-188	0.246141	0.501	0.297	1.42339e-183	6.46586e-186	GO:0070585	protein localization to mitochondrion	33/2012	144/18866	1.64627e-05	0.000259581	0.000192678	HSP90AA1/YWHAZ/YWHAH/CALM3/DNAJA1/YWHAB/YWHAG/YWHAE/SREBF2/HSPD1/YWHAQ/MAPT/HSPA4/ATP5IF1/BAG4/TSPO/HK1/PDCD5/GDAP1/RHOU/TOMM34/UBL5/FBXW7/BAP1/TOMM70/TOMM22/TOMM20/PPP3R1/SREBF1/AIP/HAX1/NMT1/BNIP3L	33										R-HSA-5654736	Signaling by FGFR1	13/1351	50/10704	0.00767691	0.0275072	0.0176118	MAPK1/UBA52/UBB/PPP2CB/SPRED1/MAPK3/HRAS/FGF1/UBC/PPP2CA/GRB2/PPP2R1A/RPS27A	13
SYNGR1	1.97655e-187	0.223255	0.88	0.793	4.35119e-183	1.97655e-185	GO:0000209	protein polyubiquitination	62/2012	340/18866	1.69356e-05	0.000265635	0.000197172	UBA52/UBB/FBXL16/TRIM2/TTC3/UBC/SKP1/CDC34/BTRC/UBE2E2/RMND5A/RNF167/PSMB4/CTNNB1/LNPEP/FBXW7/TRIM36/UBE2R2/UBE2N/NEDD4L/RPS27A/FBXO41/DYSF/UBE2Q1/UBE2K/RBX1/RLIM/TRIP12/UBE2W/UBE2B/DDA1/OTUB1/ZNRF1/NFE2L1/PSMA4/PSME1/UBE4B/UBE4A/AKTIP/WSB1/FBXL5/FBXO11/FBXO44/TNKS2/PSMD10/FBXW4/FBXL3/MDM2/LMO7/FBXW11/PSMD4/CUL3/PSMD3/PSMB7/UBE2L6/RNF146/PSMB10/PSMF1/RNF5/PSMD13/ZFP91/UBE2D2	62										R-HSA-449147	Signaling by Interleukins	76/1351	461/10704	0.00800656	0.0286129	0.0183197	SOD2/HSP90AA1/HSP90B1/YWHAZ/MAPK1/MAP2K1/APP/CANX/UBA52/MIF/UBB/SOD1/CFL1/STX1A/ARF1/PPIA/RPLP0/ITGB2/HNRNPA2B1/PPP2CB/TOLLIP/FSCN1/VAMP2/PTPRZ1/ELK1/MAPK3/CSF1R/UBC/HSPA8/PPP2CA/SKP1/TIMP1/IL34/CDC42/BTRC/VEGFA/GRB2/RHOU/HSPA9/PSMB4/CAPZA1/TCP1/PPP2R1A/PIK3R2/SQSTM1/CRKL/STX4/UBE2N/JUN/RPS27A/RBX1/RPS6KA2/PSMA4/PSME1/DUSP7/P4HB/CRK/STAT1/AIP/NDN/PSMD10/LIFR/BCL2L1/MAPK14/BRWD1/MAP2K4/FBXW11/PSMD…	76
ATP9A	2.05844e-187	0.211299	0.943	0.893	4.53146e-183	2.05844e-185	GO:0051047	positive regulation of secretion	62/2012	340/18866	1.69356e-05	0.000265635	0.000197172	SPP1/BAIAP3/SNCA/GAPDH/SYT1/MIF/STX1A/ARF1/PPIA/FCER1G/APBB1/GJA1/AQP1/ATP6AP1/PPP3CB/ITGB2/NNAT/EDNRB/STXBP1/RAB7A/RAC1/CYBA/NCS1/RAB27B/LAMP1/TREM2/CLASP2/GPI/ACSL4/HLA-DRB1/APLN/RBP4/DTNBP1/NLGN2/S100A8/CDK5R2/CHRNB2/SYT4/PPID/CADM1/SYTL2/CACNA1I/ADORA1/RAB8B/STX4/GLUD1/HGS/C2CD2L/CLASP1/CADPS/LRP1/SCAMP5/SYT7/RAB15/TARDBP/CDK5/RAB5A/PRKCE/RAB3GAP1/KIF5B/AACS/SLC12A2	62										R-HSA-8854518	AURKA Activation by TPX2	17/1351	73/10704	0.00826431	0.0294565	0.0188598	TUBA1A/HSP90AA1/TUBB4A/TUBB/YWHAG/YWHAE/DYNLL1/DCTN1/PAFAH1B1/CCP110/SSNA1/DYNC1H1/PPP2R1A/TUBA4A/ACTR1A/CLASP1/CSNK1E	17
MAP4	2.13498e-187	0.206747	0.962	0.927	4.69995e-183	2.13498e-185	GO:0099072	regulation of postsynaptic membrane neurotransmitter receptor levels	20/2012	68/18866	1.73131e-05	0.000270163	0.000200533	YWHAE/CLSTN1/HPCA/DNM1/CACNG3/ERBIN/HRAS/CALY/PRKCZ/AP2B1/DLG2/DLG1/IQSEC2/FRRS1L/EPS15/USP46/ADAM10/FLOT2/DNM2/RAP1A	20										R-HSA-68877	Mitotic Prometaphase	38/1351	204/10704	0.00839676	0.0298503	0.019112	TUBA1A/HSP90AA1/TUBA1B/TUBB4A/TUBB/TUBB2A/YWHAG/YWHAE/DYNLL1/XPO1/DCTN1/PPP2CB/TUBB3/PAFAH1B1/DYNLL2/PPP2CA/RANGAP1/MZT2A/DYNC1LI2/CLASP2/TAOK1/CCP110/SSNA1/DYNC1H1/NUDC/PPP1CC/PPP2R1A/TUBA4A/DYNC1I1/ACTR1A/MZT2B/CLASP1/NEK7/SEH1L/CSNK2A1/PPP2R5C/CSNK1E/TUBB2B	38
MAP1LC3A	2.60057e-187	0.215002	0.901	0.822	5.7249e-183	2.60057e-185	GO:0035249	synaptic transmission, glutamatergic	25/2012	96/18866	1.73146e-05	0.000270163	0.000200533	SLC17A7/NAPB/SYT1/CNIH2/ATP1A2/CACNG3/STXBP1/DGKZ/NAPA/TNR/GRIA2/CDH8/NLGN2/GRM3/NLGN3/ADORA1/CLSTN3/GRIN1/GRM5/PSEN1/NF1/CDK5/RAB3GAP1/TPRG1L/CDH2	25										R-HSA-193704	p75 NTR receptor-mediated signalling	21/1351	97/10704	0.00864167	0.0306407	0.019618	UBA52/YWHAE/UBB/RTN4/MAG/LINGO1/ARHGDIA/RTN4R/RAC1/ABR/UBC/PREX1/SQSTM1/ARHGEF9/RPS27A/PSEN1/ARHGEF2/NCSTN/RHOA/HDAC2/OMG	21
RPL24	2.8912e-187	0.183104	0.992	0.986	6.36469e-183	2.8912e-185	GO:0051017	actin filament bundle assembly	35/2012	157/18866	1.74713e-05	0.000271633	0.000201624	HSP90B1/STMN1/AIF1/S100A10/LPAR1/CX3CL1/PAK1/TMEFF2/DPYSL3/FSCN1/SYNPO/PFN1/MARCKS/RAC1/FAM107A/BAG4/EVL/BAIAP2/CLASP2/CDC42/AIF1L/DMTN/LIMCH1/FAM171A1/FLNA/CD47/ARAP1/PDXP/RDX/RHOA/CLASP1/KCTD13/CUL3/TPM1/RHOC	35										R-HSA-8986944	Transcriptional Regulation by MECP2	15/1351	62/10704	0.00885656	0.0313208	0.0200535	MOBP/HIPK2/CALM3/CAMK2D/CALM1/CALM2/SGK1/GRIN2B/GRIA2/PTEN/GAMT/TBL1XR1/NCOR2/CAMK2B/HDAC2	15
EDNRB	4.14612e-187	0.223805	0.317	0.139	9.12727e-183	4.14612e-185	GO:0099601	regulation of neurotransmitter receptor activity	22/2012	79/18866	1.74998e-05	0.000271633	0.000201624	NPTXR/NPTX1/APP/GRIA1/CNIH2/CACNG3/NEFL/NPTX2/SHISA9/GRIN2B/GRIA2/NLGN2/DLG2/DLGAP4/DLG1/NLGN3/GRIA3/GRIN1/LRRC7/SHISA7/CDK5/MINK1	22										R-HSA-195721	Signaling by WNT	57/1351	332/10704	0.00898232	0.0316831	0.0202854	YWHAZ/CALM3/PRKCG/GNAO1/UBA52/CALM1/UBB/CALM2/GNG2/SNX3/AP2M1/XPO1/PPP3CB/PPP2CB/PFN1/RAC1/CLTC/CLTA/UBC/PPP2CA/SKP1/ARRB2/GNG7/GNG3/GNB1/BTRC/AP2S1/AP2B1/TLE5/PSMB4/CTNNB1/PPP2R1A/RPS27A/CLTB/RBX1/DVL1/RHOA/TMED5/PSMA4/PSME1/PPP3R1/AP2A2/KLHL12/TNKS2/PSMD10/DAAM1/CSNK2A1/PSMD4/CUL3/PSMD3/PSMB7/PPP2R5C/RNF146/CSNK1E/PSMB10/PSMF1/PSMD13	57
ANKRD40	4.16099e-187	0.261924	0.567	0.365	9.15999e-183	4.16099e-185	GO:2001235	positive regulation of apoptotic signaling pathway	39/2012	183/18866	1.81027e-05	0.000280264	0.000208031	PEA15/NUPR1/YWHAZ/YWHAH/YWHAB/YWHAG/YWHAE/UBB/SOD1/SEPTIN4/YWHAQ/BOK/RPL11/RACK1/RPS3/ITM2C/SERINC3/ATP5IF1/BCAP31/PDIA3/PRKCD/MAL/PDCD5/PTEN/S100A8/PPP1CA/PPP2R1A/BNIP3/SFPQ/FBXW7/MLLT11/S100A9/NF1/DEDD2/RPL26/PPP3R1/NMT1/BCL2L1/CYLD	39										R-HSA-350562	Regulation of ornithine decarboxylase (ODC)	13/1351	51/10704	0.00914244	0.0321643	0.0205936	OAZ1/NQO1/AZIN1/PSMB4/PSMA4/PSME1/PSMD10/PSMD4/PSMD3/PSMB7/PSMB10/PSMF1/PSMD13	13
S100A11	4.22306e-187	0.244349	0.431	0.229	9.29665e-183	4.22306e-185	GO:0032411	positive regulation of transporter activity	28/2012	114/18866	1.82933e-05	0.000282474	0.000209671	TMSB4X/CALM3/CALM1/CALM2/ANK2/ATP1B1/ATP1B2/SGK1/CACNG3/CACNA2D1/WNK1/PRKCD/STIM1/HSPA2/TREM2/ANK3/CHP1/SYNGR3/CTSS/NLGN3/STK39/EHD3/CDK5/KCNIP2/ANTKMT/AKAP6/KIF5B/DNM2	28										R-HSA-204005	COPII-mediated vesicle transport	16/1351	68/10704	0.0092367	0.0323285	0.0206986	NSF/NAPB/GRIA1/CNIH2/NAPA/SERPINA1/PPP6R1/TMED2/TRAPPC1/TRAPPC2L/CNIH1/PREB/YKT6/SAR1B/RAB1A/NAPG	16
PLEKHH1	5.28376e-187	0.269158	0.364	0.18	1.16317e-182	5.28376e-185	GO:0035567	non-canonical Wnt signaling pathway	34/2012	151/18866	1.834e-05	0.000282474	0.000209671	GNAO1/CALM1/GNG2/AP2M1/PPP3CB/DAAM2/PFN1/RAC1/CLTC/ARRB2/CDC42/GNB1/ANKRD6/AP2S1/AP2B1/PSMB4/CTNNB1/DVL1/RHOA/CELSR2/PSMA4/PSME1/PPP3R1/AP2A2/PRICKLE2/PSMD10/DAAM1/PSMD4/PSMD3/PSMB7/CSNK1E/PSMB10/PSMF1/PSMD13	34										R-HSA-69615	G1/S DNA Damage Checkpoints	16/1351	68/10704	0.0092367	0.0323285	0.0206986	UBA52/UBB/UBC/PSMB4/RPS27A/PCBP4/PSMA4/PSME1/PSMD10/MDM2/PSMD4/PSMD3/PSMB7/PSMB10/PSMF1/PSMD13	16
SOX10	6.49767e-186	0.236391	0.315	0.137	1.4304e-181	6.49767e-184	GO:0032092	positive regulation of protein binding	23/2012	85/18866	1.89972e-05	0.000291843	0.000216626	HIPK2/HSP90AB1/APP/APOE/B2M/FKBP1A/PPP2CB/MAPRE3/RPL11/PPP2CA/RAN/PLK2/SPPL3/PLXND1/PIN1/PSEN1/HSF1/DERL1/LRP1/AKTIP/CDK5/FLOT1/USP33	23										R-HSA-114452	Activation of BH3-only proteins	9/1351	30/10704	0.0095153	0.0331328	0.0212136	YWHAZ/YWHAH/YWHAB/YWHAG/YWHAE/DYNLL1/YWHAQ/DYNLL2/PPP3R1	9
GPR37	6.93597e-185	0.230636	0.269	0.102	1.52688e-180	6.93597e-183	GO:0034764	positive regulation of transmembrane transport	43/2012	210/18866	1.95856e-05	0.000300112	0.000222764	C3/SNCA/THY1/TMSB4X/CALM3/ARPP19/CALM1/CALM2/ANK2/APLNR/ARF1/ATP1B1/ATP1B2/CX3CL1/ARL6IP1/CACNG3/CACNA2D1/CAPN3/WNK1/CLIP3/STIM1/HSPA2/TREM2/CA2/ANK3/CHP1/AZIN1/CTSS/NLGN3/FLNA/ADIPOR2/STK39/PSEN1/EHD3/CDK5/KCNIP2/MAPK14/ANTKMT/AKAP6/OSBPL8/KIF5B/DNM2/RAP1A	43										R-HSA-418360	Platelet calcium homeostasis	9/1351	30/10704	0.0095153	0.0331328	0.0212136	ATP2B4/CALM3/CALM1/CALM2/SLC8A2/ATP2A2/STIM1/ATP2B3/ATP2B1	9
COBL	7.39501e-185	0.236472	0.561	0.357	1.62794e-180	7.39501e-183	GO:0030901	midbrain development	24/2012	91/18866	2.01586e-05	0.000307316	0.00022811	PLP1/MBP/CNP/YWHAH/CALM3/CALM1/ACTB/YWHAE/CALM2/DYNLL1/YWHAQ/MAOB/HSPA5/SIRT2/BASP1/PADI2/KAT2A/CDC42/SYNGR3/CTNNB1/GLUD1/RHOA/FGFR2/CSNK1E	24										R-HSA-168179	Toll Like Receptor TLR1:TLR2 Cascade	21/1351	98/10704	0.00972787	0.0337001	0.0215769	MAPK1/MAP2K1/APP/UBA52/UBB/PPP2CB/ELK1/MAPK3/UBC/PPP2CA/SKP1/BTRC/PPP2R1A/UBE2N/JUN/RPS27A/RPS6KA2/DUSP7/MAPK14/MAP2K4/FBXW11	21
RPL5	5.68448e-184	0.193858	0.979	0.962	1.25138e-179	5.68448e-182	GO:1901379	regulation of potassium ion transmembrane transport	24/2012	91/18866	2.01586e-05	0.000307316	0.00022811	YWHAE/ANK2/BIN1/PRNP/ATP1B1/ATP1B2/CD63/KCNG1/VAMP2/KCNAB2/WNK1/TREM2/ANK3/PTEN/RGS4/DLG1/FLNA/KCNIP3/STK39/NEDD4L/DPP6/KCNIP2/AKAP6/DNM2	24										R-HSA-181438	Toll Like Receptor 2 (TLR2) Cascade	21/1351	98/10704	0.00972787	0.0337001	0.0215769	MAPK1/MAP2K1/APP/UBA52/UBB/PPP2CB/ELK1/MAPK3/UBC/PPP2CA/SKP1/BTRC/PPP2R1A/UBE2N/JUN/RPS27A/RPS6KA2/DUSP7/MAPK14/MAP2K4/FBXW11	21
NDUFA3	5.74371e-184	0.195491	0.975	0.946	1.26442e-179	5.74371e-182	GO:1900180	regulation of protein localization to nucleus	30/2012	127/18866	2.11321e-05	0.000321337	0.000238518	APOD/MAPK1/HSP90AB1/PRKCD/PKIA/CCT5/CHP1/RAN/TRIM8/TCP1/FLNA/PIK3R2/PIN1/DCLK1/HCLS1/PSEN1/NUTF2/UFM1/CCT2/PARP1/NF1/DCLK2/LZTS2/TARDBP/SUMO3/MAPK14/CDK5RAP3/CCT7/CCT3/IPO5	30										R-HSA-8854214	TBC/RABGAPs	12/1351	46/10704	0.00995131	0.0343865	0.0220163	RAB6B/RAB7A/RAB5B/RAB6A/GABARAP/RAB8B/RABGAP1/RABEP1/TBC1D14/TBC1D13/RAB5A/RAB4A	12
DBI	1.57915e-183	0.212887	0.963	0.921	3.47633e-179	1.57915e-181	GO:0090382	phagosome maturation	16/2012	48/18866	2.12424e-05	0.000322194	0.000239154	ATP6V0C/CORO1A/ATP6V1H/ATP6V1B2/ATP6V1G2/RAB7A/ATP6V1A/ATP6V0E2/ATP6V0A1/ATP6V0B/ATP6V1C1/ATP6V1E1/ATP6V0D1/ATP6V1F/ATP6V1D/SYT7	16										R-HSA-175474	Assembly Of The HIV Virion	6/1351	16/10704	0.010396	0.0358319	0.0229418	UBA52/UBB/PPIA/UBC/RPS27A/MVB12B	6
HHATL	7.44712e-183	0.23369	0.4	0.211	1.63941e-178	7.44712e-181	GO:0051169	nuclear transport	64/2012	357/18866	2.16621e-05	0.00032751	0.0002431	APOD/MAPK1/HSP90AB1/CALR/YWHAE/XPO1/UHMK1/HNRNPA2B1/RPS15/HNRNPA1/RPL23/TXN/CAMK1/RGS14/IPO13/PRKCD/EIF5A/PKIA/RANGAP1/IPO7/DHX9/CHP1/RAN/RBM4/HSPA9/SLBP/ANP32B/PPP1CC/FLNA/PIK3R2/SRSF6/CASC3/XPO6/HCLS1/NXF1/ANP32A/PSEN1/NUTF2/UFM1/XPO7/DESI1/CSE1L/SRSF1/NF1/LZTS2/KPNA4/PPP1R10/BANF1/TARDBP/CDK5/SEH1L/RBM26/MDM2/THOC7/MAPK14/RNPS1/AGFG1/SMG1/FAM53C/EIF4E/ALKBH5/PABPN1/IPO5/KPNB1	64										R-HSA-2995410	Nuclear Envelope (NE) Reassembly	17/1351	75/10704	0.0108827	0.0374145	0.023955	TUBA1A/TUBA1B/TUBB4A/TUBB2A/SIRT2/TUBB3/PPP2CA/RANGAP1/RAN/PPP2R1A/TUBA4A/BANF1/SEH1L/IST1/UBE2I/KPNB1/TUBB2B	17
SIRT2	8.1181e-183	0.250614	0.806	0.694	1.78712e-178	8.1181e-181	GO:0043620	regulation of DNA-templated transcription in response to stress	28/2012	115/18866	2.17516e-05	0.00032751	0.0002431	HSPA1A/UBA52/UBB/HSPA5/SIRT2/RGS14/DNAJB1/UBC/ATF4/VEGFA/ELOB/PSMB4/RBPJ/JUN/RPS27A/HSF1/RBX1/TMBIM6/EGLN2/PSMA4/PSME1/PSMD10/PSMD4/PSMD3/PSMB7/PSMB10/PSMF1/PSMD13	28										R-HSA-190236	Signaling by FGFR	19/1351	87/10704	0.0110454	0.0378778	0.0242517	MAPK1/UBA52/UBB/POLR2L/PPP2CB/SPRED1/HNRNPA1/MAPK3/HRAS/FGF1/UBC/PPP2CA/GRB2/POLR2F/PPP2R1A/RPS27A/FGFR2/POLR2J/TIAL1	19
FSCN1	2.14717e-182	0.233356	0.795	0.671	4.72677e-178	2.14717e-180	GO:0043618	regulation of transcription from RNA polymerase II promoter in response to stress	27/2012	109/18866	2.17573e-05	0.00032751	0.0002431	HSPA1A/UBA52/UBB/HSPA5/SIRT2/DNAJB1/UBC/ATF4/VEGFA/ELOB/PSMB4/RBPJ/JUN/RPS27A/HSF1/RBX1/TMBIM6/EGLN2/PSMA4/PSME1/PSMD10/PSMD4/PSMD3/PSMB7/PSMB10/PSMF1/PSMD13	27										R-HSA-1236394	Signaling by ERBB4	14/1351	58/10704	0.0114679	0.0392278	0.025116	GFAP/STMN1/APOE/UBA52/UBB/HRAS/ADAP1/UBC/ERBB3/GRB2/GABRB3/RPS27A/PSEN1/NCSTN	14
MT-CO2	1.2358e-181	0.160677	1	1	2.72048e-177	1.2358e-179	GO:0007616	long-term memory	13/2012	34/18866	2.37725e-05	0.000356947	0.00026495	SLC17A7/APOE/PRNP/GRIA1/SGK1/RGS14/PJA2/KAT2A/PRKCZ/BTBD9/ADCY1/GRIN1/CALB1	13										R-HSA-111932	CaMK IV-mediated phosphorylation of CREB	5/1351	12/10704	0.0117057	0.0397212	0.0254319	CALM3/CAMK2D/CALM1/CALM2/CAMK2B	5
BEX1	2.91095e-181	0.198181	0.994	0.976	6.40816e-177	2.91095e-179	GO:0009408	response to heat	36/2012	166/18866	2.51944e-05	0.000377347	0.000280093	CRYAB/HSP90AA1/HSPA1A/MAPK1/HSP90AB1/HSPH1/CAMK2D/DNAJA1/PTGES3/YWHAE/SOD1/HSPD1/DNAJA4/ATP2A2/MAPT/MAPK3/DNAJB1/FGF1/HSPA8/BAG4/LRP11/CHORDC1/HSPA2/HSBP1/HSPA1B/FKBP4/DNAJB4/DNAJC7/HSF1/DNAJB6/CAMK2B/NF1/HSPB8/ARPP21/SEH1L/HDAC2	36										R-HSA-389359	CD28 dependent Vav1 pathway	5/1351	12/10704	0.0117057	0.0397212	0.0254319	PAK1/RAC1/CDC42/PAK3/GRB2	5
C1R	3.03642e-181	0.224982	0.297	0.125	6.68438e-177	3.03642e-179	GO:0006835	dicarboxylic acid transport	25/2012	98/18866	2.53591e-05	0.000378864	0.000281219	SLC17A7/SYT1/STX1A/GJA1/ARL6IP1/SLC25A22/ATP1A2/GLS/VAMP2/STXBP1/PRAF2/ARL6IP5/APBA1/SYT4/ADORA1/PSEN1/TSPOAP1/NF1/HRH3/PPFIA2/RAB3GAP1/LRRC8D/PPFIA3/SLC12A2/SLC25A11	25										R-HSA-5689877	Josephin domain DUBs	5/1351	12/10704	0.0117057	0.0397212	0.0254319	UBA52/UBB/RAD23B/UBC/RPS27A	5
CACNG3	3.13584e-181	0.240475	0.602	0.411	6.90324e-177	3.13584e-179	GO:0001666	response to hypoxia	64/2012	359/18866	2.5887e-05	0.000385788	0.000286358	CRYAB/HSP90B1/HIPK2/LDHA/UBA52/UBB/DDIT4/HSPD1/ATP1B1/AQP1/PKM/PAK1/SIRT2/ENO1/CD24/CYBA/DDAH1/UBC/B3GAT1/OPA1/NDRG1/PDK3/GNB1/VEGFA/ELOB/PTEN/HYOU1/CPEB2/CHRNB2/PSMB4/BNIP3/HMOX2/ADORA1/PIN1/RBPJ/RPS27A/PLOD1/HSF1/RBX1/LONP1/TMBIM6/RHOA/NF1/EGLN2/PSMA4/PSME1/TXN2/P4HB/PRKCE/AK4/ARNT2/SCAP/AHCY/PSMD10/MDM2/PSMD4/ALAD/PSMD3/PSMB7/PSMB10/PSMF1/BNIP3L/PSMD13/ALKBH5	64										R-HSA-5218921	VEGFR2 mediated cell proliferation	7/1351	21/10704	0.0117292	0.0397212	0.0254319	CALM3/CALM1/CALM2/HRAS/PRKCD/VEGFA/PRKCZ	7
RPL11	6.39296e-181	0.210104	0.953	0.909	1.40735e-176	6.39296e-179	GO:0034205	amyloid-beta formation	14/2012	39/18866	2.68125e-05	0.000397596	0.000295123	APP/APOE/BIN1/ABCA2/PRNP/CLU/PICALM/IFNGR1/PIN1/DYRK1A/PSEN1/SLC2A13/NCSTN/ADAM10	14										R-HSA-174084	Autodegradation of Cdh1 by Cdh1:APC/C	15/1351	64/10704	0.0119321	0.0403078	0.0258075	UBA52/UBB/UBC/PSMB4/RPS27A/PSMA4/PSME1/PSMD10/PSMD4/PSMD3/PSMB7/ANAPC16/PSMB10/PSMF1/PSMD13	15
GAP43	1.08929e-180	0.21673	0.96	0.894	2.39796e-176	1.08929e-178	GO:0071709	membrane assembly	14/2012	39/18866	2.68125e-05	0.000397596	0.000295123	PSAP/S100A10/SPTBN1/ANK3/NRXN2/PICALM/PTEN/NLGN2/NLGN3/STX4/PTPRD/FLOT1/CDH2/FLOT2	14										R-HSA-1971475	A tetrasaccharide linker sequence is required for GAG synthesis	8/1351	26/10704	0.012121	0.0408446	0.0261512	B3GAT1/BCAN/XYLT1/NCAN/BGN/VCAN/B3GAT3/SDC3	8
ATP2C1	1.41742e-180	0.22967	0.568	0.371	3.12031e-176	1.41742e-178	GO:0032802	low-density lipoprotein particle receptor catabolic process	8/2012	14/18866	2.7419e-05	0.000405585	0.000301052	APOE/ABCA2/AP2M1/CLTC/CLTA/AP2S1/AP2B1/AP2A2	8										R-HSA-1660499	Synthesis of PIPs at the plasma membrane	13/1351	53/10704	0.012723	0.0426624	0.027315	PIP4K2A/ARF1/PIP4K2B/SYNJ2/PTEN/PIK3R2/PIP5K1C/SYNJ1/PLEKHA2/INPP4A/RAB5A/RAB4A/MTMR6	13
GNAZ	1.80864e-180	0.229009	0.53	0.328	3.98154e-176	1.80864e-178	GO:0035307	positive regulation of protein dephosphorylation	15/2012	44/18866	2.82819e-05	0.000417315	0.000309759	HSP90AB1/CALM3/CALM1/CALM2/NSMF/PTPA/PRKCD/SLC39A10/SPPL3/GBA/ADORA1/PIN1/SMPD1/PPP1R16B/DUSP26	15										R-HSA-157118	Signaling by NOTCH	42/1351	236/10704	0.0127233	0.0426624	0.027315	YWHAZ/UBA52/UBB/CNTN1/ATP2A2/YBX1/UBC/SKP1/ARRB2/KAT2A/SEL1L/HDAC11/PSMB4/TBL1XR1/TMED2/RAB6A/FBXW7/PLXND1/NEURL1/RBPJ/JUN/RPS27A/PSEN1/HDAC5/NCOR2/RBX1/NCSTN/PSMA4/PSME1/DNER/STAT1/PSMD10/HDAC4/ADAM10/HDAC2/PSMD4/PSMD3/PSMB7/PSMB10/PSMF1/FABP7/PSMD13	42
CDK17	8.91523e-180	0.219966	0.512	0.308	1.9626e-175	8.91523e-178	GO:0097305	response to alcohol	46/2012	234/18866	3.03117e-05	0.000446165	0.000331173	CALM3/SOD1/ABCA2/GNG2/MAOB/EEF1B2/NEFL/SLIT3/RPL27/CYBA/RPL10A/GRIN2B/HMGCR/GLRA2/EEF2/NQO1/GNB1/PTEN/LARP1/RBP4/S100A8/GNAI1/CHRNB2/RGS4/CTNNB1/ADCY1/GRIN1/ADCY5/LANCL2/RHOA/KLF9/PARP1/FGFR2/NFE2L1/GSTP1/ATP2B1/PRKCE/GRAMD1B/ACTR2/BCL2L1/USP46/HDAC2/ALAD/HMGCS1/AACS/TUFM	46										R-HSA-2173782	Binding and Uptake of Ligands by Scavenger Receptors	11/1351	42/10704	0.0129259	0.0430228	0.0275458	FTL/HSP90AA1/HSP90B1/HSPH1/CALR/FTH1/APOE/HYOU1/STAB1/CD163/LRP1	11
CD81	1.72118e-179	0.177209	0.993	0.987	3.78901e-175	1.72118e-177	GO:0046486	glycerolipid metabolic process	74/2012	434/18866	3.04553e-05	0.000447176	0.000331924	C3/APOC1/PIP4K2A/CPNE6/FABP3/SLC44A1/APOE/SERINC1/ENPP2/ARF1/PLAAT4/MBOAT7/ARF3/DBI/APOC2/PIP4K2B/DGKZ/PAFAH1B1/AGPAT1/PLAAT3/AGAP2/SERINC3/PGAP1/PI4KA/CSF1R/CPNE7/TTC7B/SYNJ2/SEL1L/ACSL4/PTEN/ABHD6/CTDNEP1/PTDSS1/AGPAT4/FAAH/TBL1XR1/PIK3R2/HADHB/PIP5K1C/FBXW7/ITPKB/GNPAT/EFR3A/SYNJ1/CDS2/IP6K2/EFR3B/PLEKHA2/PLA2G4C/FAR1/SELENOI/DGKG/PDXP/GDE1/VAC14/INPP4A/PIGT/CPNE3/SREBF1/MBOAT2/SLC27A1/RAB5A/C…	74										R-HSA-2426168	Activation of gene expression by SREBF (SREBP)	11/1351	42/10704	0.0129259	0.0430228	0.0275458	SREBF2/SCD/HMGCR/SMARCD3/TBL1XR1/FASN/CYP51A1/DHCR7/SREBF1/HMGCS1/LSS	11
SPRED1	3.13471e-179	0.223013	0.428	0.234	6.90075e-175	3.13471e-177	GO:0031331	positive regulation of cellular catabolic process	68/2012	390/18866	3.0674e-05	0.000447673	0.000332293	NUPR1/HSP90AA1/HSPA1A/SNCA/PIP4K2A/APP/DNAJB2/APOE/ABCA2/SCOC/SIRT2/CD81/CLU/RACK1/DDRGK1/TP53INP2/APOC2/PIP4K2B/UQCC2/MAPK3/PTK2/ATP5IF1/BCAP31/PRKCD/NRDC/TREM2/PTEN/HSPA1B/TMEM59/TRIM8/LARP1/PLK2/ZER1/BNIP3/GBA/USP5/FBXW7/CNOT7/PSEN1/PABPC1/CEBPA/SPTLC2/HSF1/RBX1/RDX/DVL1/HSPBP1/HSPB8/DDA1/LRP1/MTDH/FBXL5/TARDBP/PSMD10/RAB3GAP1/SGTA/MDM2/KEAP1/YTHDF3/YTHDF2/SUPT5H/HERPUD1/PUM1/SVIP/CSNK1E/BNIP3…	68										R-HSA-381676	Glucagon-like Peptide-1 (GLP1) regulates insulin secretion	11/1351	42/10704	0.0129259	0.0430228	0.0275458	GNG2/PRKAR1A/GNG7/PRKACB/GNG3/GNB1/PRKAR1B/ADCY5/RAPGEF4/AKAP5/RAP1A	11
ENO1	5.43729e-179	0.172024	0.997	0.991	1.19696e-174	5.43729e-177	GO:0008306	associative learning	21/2012	76/18866	3.06767e-05	0.000447673	0.000332293	GABRA5/APP/ATP1A2/NEUROD2/SYNPO/NDRG4/NPTN/NPTX2/RGS14/HMGCR/TNR/CHRNB2/NLGN3/PPT1/GRIN1/LGMN/NF1/SYNGAP1/CDK5/ACTR2/RIC8A	21										R-HSA-351202	Metabolism of polyamines	14/1351	59/10704	0.0133385	0.0441798	0.0282866	OAZ1/NQO1/AZIN1/PSMB4/SRM/PSMA4/PSME1/PSMD10/PSMD4/PSMD3/PSMB7/PSMB10/PSMF1/PSMD13	14
SYNPO	6.03196e-179	0.222509	0.836	0.73	1.32788e-174	6.03196e-177	GO:1902305	regulation of sodium ion transmembrane transport	19/2012	65/18866	3.07208e-05	0.000447673	0.000332293	SCN3B/ATP2B4/YWHAH/FXYD6/CAMK2D/ARF1/ATP1B1/ATP1B2/ATP1A2/WNK1/ANK3/CHP1/SCN2B/DLG1/STK39/NEDD4L/PRKCE/KIF5B/DNM2	19										R-HSA-68827	CDT1 association with the CDC6:ORC:origin complex	14/1351	59/10704	0.0133385	0.0441798	0.0282866	UBA52/UBB/UBC/PSMB4/RPS27A/PSMA4/PSME1/PSMD10/PSMD4/PSMD3/PSMB7/PSMB10/PSMF1/PSMD13	14
VAMP2	1.2094e-178	0.179196	0.992	0.976	2.66238e-174	1.2094e-176	GO:0010469	regulation of signaling receptor activity	37/2012	174/18866	3.08636e-05	0.000447673	0.000332293	MTRNR2L1/NPTXR/NPTX1/LY6H/APP/DKK3/GRIA1/CNIH2/CACNG3/NEFL/LRPAP1/MTRNR2L6/NPTX2/SHISA9/GRIN2B/PRKCD/GRIA2/PTEN/NLGN2/DLG2/DLGAP4/DLG1/NLGN3/FBXW7/ADORA1/NEURL1/GRIA3/GRIN1/LRRC7/PSEN1/SHISA7/LDOC1/LY6E/CDK5/SNX6/CNRIP1/MINK1	37										R-HSA-1257604	PIP3 activates AKT signaling	46/1351	264/10704	0.0137005	0.0451778	0.0289255	PIP4K2A/MAPK1/UBA52/UBB/PPP2CB/PIP4K2B/RAC1/MAPK3/FGF1/UBC/CHD3/ERBB3/PPP2CA/PTEN/GRB2/PSMB4/PPP2R1A/PIK3R2/PIP5K1C/CBX6/JUN/RPS27A/RHOG/HDAC5/FGFR2/PSMA4/PSME1/LAMTOR2/USP7/TNKS2/PSMD10/MDM2/LAMTOR4/HDAC2/CSNK2A1/PSMD4/PSMD3/PSMB7/PPP2R5C/RNF146/PSMB10/PSMF1/PHLPP1/PSMD13/CHD4/MAF1	46
BASP1	1.61199e-178	0.192354	0.994	0.977	3.54863e-174	1.61199e-176	GO:0051099	positive regulation of binding	37/2012	174/18866	3.08636e-05	0.000447673	0.000332293	HIPK2/HSP90AB1/CALM3/STMN1/APP/APOE/B2M/S100A10/FKBP1A/PPP2CB/MAPRE3/SIRT2/RPL11/DDRGK1/TXN/EDF1/PPP2CA/RIPOR2/DHX9/RAN/EIF4G1/PLK2/CTNNB1/SPPL3/PLXND1/PIN1/PSEN1/HSF1/PARP1/DERL1/LARP6/LRP1/AKTIP/CDK5/EIF3E/FLOT1/USP33	37										R-HSA-2500257	Resolution of Sister Chromatid Cohesion	25/1351	126/10704	0.0137064	0.0451778	0.0289255	TUBA1A/TUBA1B/TUBB4A/TUBB2A/DYNLL1/XPO1/PPP2CB/TUBB3/PAFAH1B1/DYNLL2/PPP2CA/RANGAP1/DYNC1LI2/CLASP2/TAOK1/DYNC1H1/NUDC/PPP1CC/PPP2R1A/TUBA4A/DYNC1I1/CLASP1/SEH1L/PPP2R5C/TUBB2B	25
ARPC5	4.12501e-178	0.225322	0.54	0.34	9.08079e-174	4.12501e-176	GO:0038094	Fc-gamma receptor signaling pathway	32/2012	142/18866	3.13515e-05	0.000453648	0.000336728	HSP90AA1/MAPK1/HSP90AB1/ACTB/FCER1G/PAK1/ARPC5/CYFIP2/RAC1/MAPK3/PTK2/PRKCD/ARPC4/FCGR3A/BAIAP2/CDC42/GRB2/ARPC3/PIK3R2/CD47/ACTR3/ARPC1B/NCKAP1/BRK1/ELMO2/PTPRJ/CRK/PRKCE/ACTR2/ELMO1/RAP1A/ARPC1A	32										R-HSA-75105	Fatty acyl-CoA biosynthesis	10/1351	37/10704	0.0139342	0.0457774	0.0293094	SCD5/SCD/ELOVL1/ACSL4/ELOVL5/FASN/PPT1/SLC25A1/ACLY/TECR	10
HNRNPA1	7.23141e-178	0.213145	0.91	0.851	1.59192e-173	7.23141e-176	GO:0006913	nucleocytoplasmic transport	63/2012	354/18866	3.14797e-05	0.000454403	0.000337288	APOD/MAPK1/HSP90AB1/CALR/YWHAE/XPO1/UHMK1/HNRNPA2B1/RPS15/HNRNPA1/RPL23/TXN/CAMK1/RGS14/IPO13/PRKCD/EIF5A/PKIA/RANGAP1/IPO7/DHX9/CHP1/RAN/RBM4/HSPA9/SLBP/ANP32B/PPP1CC/FLNA/PIK3R2/SRSF6/CASC3/XPO6/HCLS1/NXF1/ANP32A/PSEN1/NUTF2/UFM1/XPO7/DESI1/CSE1L/SRSF1/NF1/LZTS2/KPNA4/PPP1R10/TARDBP/CDK5/SEH1L/RBM26/MDM2/THOC7/MAPK14/RNPS1/AGFG1/SMG1/FAM53C/EIF4E/ALKBH5/PABPN1/IPO5/KPNB1	63										R-HSA-68949	Orc1 removal from chromatin	16/1351	71/10704	0.0140039	0.0457774	0.0293094	UBA52/UBB/UBC/SKP1/PSMB4/RPS27A/RBX1/PSMA4/PSME1/PSMD10/PSMD4/PSMD3/PSMB7/PSMB10/PSMF1/PSMD13	16
C4orf48	7.46374e-178	0.212219	0.948	0.903	1.64307e-173	7.46374e-176	GO:1902115	regulation of organelle assembly	40/2012	194/18866	3.18392e-05	0.000458485	0.000340318	NUPR1/HSPA1A/PIP4K2A/MAP4/FSCN1/GAP43/FEZ1/PIP4K2B/G3BP2/KCTD17/KAT2A/LRRTM1/HSPA1B/CHMP1B/CCP110/DYNC1H1/CHMP1A/PLK2/SEPTIN7/SEPTIN9/TBC1D14/ARHGEF2/RDX/RHOA/EVI5L/HNRNPU/CDKL5/ATXN2L/LRRTM2/PTPRD/RBM14/ARHGAP35/RAB5A/NBDY/RAB3GAP1/CYLD/RNF5/ATMIN/DNM2/LRRC4B	40										R-HSA-70171	Glycolysis	16/1351	71/10704	0.0140039	0.0457774	0.0293094	TPI1/GAPDH/PGM2L1/PKM/PPP2CB/ENO1/PGAM2/PPP2CA/PFKP/PRKACB/HK1/GPI/ENO2/PPP2R1A/PGAM1/SEH1L	16
RPL30	1.22321e-177	0.190616	0.993	0.99	2.69278e-173	1.22321e-175	GO:1902683	regulation of receptor localization to synapse	9/2012	18/18866	3.47055e-05	0.000495565	0.000367842	CNIH2/TYROBP/NPTN/HRAS/PRKCZ/STX7/IQSEC2/ADAM10/RAP1A	9										R-HSA-428157	Sphingolipid metabolism	19/1351	89/10704	0.0140349	0.0457774	0.0293094	PSAP/UGT8/FA2H/B4GALNT1/PLPP2/VAPA/CERS6/B3GALNT1/GBA/CTSA/GLTP/SPTLC2/SMPD1/CERS4/CERS2/ASAH1/PPM1L/VAPB/SAMD8	19
NEFL	1.49613e-177	0.187491	0.997	0.979	3.29357e-173	1.49613e-175	GO:1990000	amyloid fibril formation	9/2012	18/18866	3.47055e-05	0.000495565	0.000367842	CRYAB/APP/APOE/B2M/FKBP1A/CLU/MAPT/PSEN1/MDM2	9										R-HSA-418597	G alpha (z) signalling events	12/1351	48/10704	0.0140568	0.0457774	0.0293094	PRKCG/GNG2/GNAZ/PRKCD/GNG7/GNG3/GNB1/GNAI1/RGS4/ADCY1/ADCY5/PRKCE	12
PFN1	2.94863e-177	0.233597	0.844	0.76	6.49111e-173	2.94863e-175	GO:0098883	synapse pruning	7/2012	11/18866	3.47459e-05	0.000495565	0.000367842	C1QB/C1QA/C3/C1QC/CX3CL1/TREM2/CDK5	7										R-HSA-202131	Metabolism of nitric oxide: NOS3 activation and regulation	6/1351	17/10704	0.0143819	0.0467241	0.0299156	HSP90AA1/CALM3/CALM1/CALM2/DDAH1/DNM2	6
OPALIN	4.24051e-177	0.282286	0.337	0.162	9.33505e-173	4.24051e-175	GO:1905383	protein localization to presynapse	7/2012	11/18866	3.47459e-05	0.000495565	0.000367842	HSPB1/RAB27B/MAPK8IP3/KIF5C/DLG2/DVL1/KIF5B	7										R-HSA-2871796	FCERI mediated MAPK activation	9/1351	32/10704	0.0147991	0.0478503	0.0306367	MAPK1/FCER1G/PAK1/RAC1/MAPK3/HRAS/GRB2/JUN/MAP2K4	9
CDK18	1.2843e-175	0.245467	0.347	0.17	2.82727e-171	1.2843e-173	GO:0045540	regulation of cholesterol biosynthetic process	16/2012	50/18866	3.7712e-05	0.000535313	0.000397346	APOE/SOD1/SREBF2/SCD/FGF1/HMGCR/RAN/FASN/CYP51A1/DHCR7/SREBF1/SCAP/POR/HMGCS1/LSS/KPNB1	16										R-HSA-456926	Thrombin signalling through proteinase activated receptors (PARs)	9/1351	32/10704	0.0147991	0.0478503	0.0306367	MAPK1/GNG2/MAPK3/ARRB2/GNG7/GNG3/GNB1/GNAQ/GNA12	9
CLU	4.25032e-175	0.146058	1	1	9.35665e-171	4.25032e-173	GO:0106118	regulation of sterol biosynthetic process	16/2012	50/18866	3.7712e-05	0.000535313	0.000397346	APOE/SOD1/SREBF2/SCD/FGF1/HMGCR/RAN/FASN/CYP51A1/DHCR7/SREBF1/SCAP/POR/HMGCS1/LSS/KPNB1	16										R-HSA-264876	Insulin processing	8/1351	27/10704	0.0153641	0.049343	0.0315923	STX1A/VAMP2/KIF5C/MYO5A/PCSK2/EXOC7/EXOC5/KIF5B	8
PRKAR1A	1.84808e-174	0.199889	0.937	0.883	4.06836e-170	1.84808e-172	GO:0030534	adult behavior	31/2012	137/18866	3.80643e-05	0.000539034	0.000400107	CNP/HIPK2/NPY/CNTN2/SNCG/APP/UCHL1/ATP1A2/PAFAH1B1/PCDH17/ARRB2/NRXN2/PTEN/EFNB3/CHL1/CHRNB2/NLGN3/SEZ6L/BTBD9/PPT1/CSTB/GRIN1/GLRB/NCSTN/WDR47/MAFG/CDK5/SLITRK1/USP46/HDAC2/PUM1	31										R-HSA-354192	Integrin signaling	8/1351	27/10704	0.0153641	0.049343	0.0315923	PTK2/BCAR1/RASGRP1/GRB2/RAPGEF4/CRK/TLN1/RAP1A	8
AATK	2.8028e-174	0.260726	0.574	0.388	6.17009e-170	2.8028e-172	GO:0014002	astrocyte development	15/2012	45/18866	3.82662e-05	0.000540613	0.000401279	PLP1/C1QA/APP/MAPT/GRN/TREM2/IFNGR1/S100A8/NR1D1/PSEN1/S100A9/NF1/LRP1/POU3F2/VIM	15										R-HSA-432040	Vasopressin regulates renal water homeostasis via Aquaporins	11/1351	43/10704	0.0154424	0.049343	0.0315923	GNG2/AQP4/AQP1/PRKAR1A/GNG7/PRKACB/GNG3/GNB1/PRKAR1B/ADCY1/ADCY5	11
RPL15	4.08034e-174	0.154383	0.999	0.997	8.98246e-170	4.08034e-172	GO:0036293	response to decreased oxygen levels	65/2012	371/18866	3.90754e-05	0.000550742	0.000408798	CRYAB/HSP90B1/HIPK2/LDHA/UBA52/UBB/DDIT4/HSPD1/ATP1B1/AQP1/PKM/PAK1/SIRT2/ENO1/CD24/CYBA/DDAH1/UBC/B3GAT1/OPA1/ATF4/NDRG1/PDK3/GNB1/VEGFA/ELOB/PTEN/HYOU1/CPEB2/CHRNB2/PSMB4/BNIP3/HMOX2/ADORA1/PIN1/RBPJ/RPS27A/PLOD1/HSF1/RBX1/LONP1/TMBIM6/RHOA/NF1/EGLN2/PSMA4/PSME1/TXN2/P4HB/PRKCE/AK4/ARNT2/SCAP/AHCY/PSMD10/MDM2/PSMD4/ALAD/PSMD3/PSMB7/PSMB10/PSMF1/BNIP3L/PSMD13/ALKBH5	65										R-HSA-977444	GABA B receptor activation	11/1351	43/10704	0.0154424	0.049343	0.0315923	GNG2/GABBR1/GNG7/GNG3/KCNJ9/GNB1/GNAI1/GNAL/GABBR2/ADCY1/ADCY5	11
MAPK8IP1	5.79395e-174	0.204843	0.873	0.772	1.27548e-169	5.79395e-172	GO:0051494	negative regulation of cytoskeleton organization	35/2012	163/18866	4.03652e-05	0.000567583	0.000421298	SNCA/TMSB4X/STMN1/TUBB4A/TMSB10/CORO1A/MAP2/STMN2/SPTBN1/MTPN/TMEFF2/PFN1/CAPZB/CLIP3/SPTAN1/PRKCD/KAT2A/CLASP2/TAOK1/MID1IP1/GMFB/CCP110/MAP6D1/DMTN/CAPZA1/BMERB1/FKBP4/DYRK1A/ARAP1/ARHGEF2/RDX/CLASP1/CAPG/APC2/RBM14	35										R-HSA-991365	Activation of GABAB receptors	11/1351	43/10704	0.0154424	0.049343	0.0315923	GNG2/GABBR1/GNG7/GNG3/KCNJ9/GNB1/GNAI1/GNAL/GABBR2/ADCY1/ADCY5	11
RPL27A	7.68748e-174	0.211793	0.954	0.917	1.69232e-169	7.68748e-172	GO:0031330	negative regulation of cellular catabolic process	50/2012	265/18866	4.33803e-05	0.000608547	0.000451704	NUPR1/APOC1/SNCA/HIPK2/ATP2B4/HSP90AB1/TIMP2/PRKCG/HNRNPC/RPL5/SIRT2/RPL11/EIF4G2/RPL23/FEZ1/DDRGK1/PTK2/YBX1/MGAT3/TSPO/TIMP1/WDR6/TREM2/DHX9/EIF4G1/LARP1/USP14/RBM10/CTSA/PSEN1/PABPC1/TBC1D14/RYBP/QSOX1/HNRNPU/NBAS/TARDBP/NRBP2/USP7/SGTA/MAPK14/CDK5RAP3/CSNK2A1/ALAD/SMG1/SVIP/PSMF1/RNF5/UBXN1/WAC	50										R-HSA-8878159	Transcriptional regulation by RUNX3	20/1351	96/10704	0.0155131	0.0494525	0.0316625	SPP1/UBA52/UBB/UBC/KAT2A/PSMB4/CTNNB1/RBPJ/RPS27A/PSMA4/PSME1/PSMD10/HDAC4/MDM2/PSMD4/PSMD3/PSMB7/PSMB10/PSMF1/PSMD13	20
RPL18	9.25343e-174	0.168597	0.993	0.989	2.03705e-169	9.25343e-172	GO:0048524	positive regulation of viral process	26/2012	107/18866	4.37496e-05	0.000612289	0.000454482	CD74/APOE/CFL1/PPIA/POLR2L/PPIB/RAB7A/CSF1R/HSPA8/HLA-DRB1/DHX9/VAPA/LARP1/POLR2F/PPID/ADAR/CNOT7/JUN/PABPC1/STAU1/NUCKS1/P4HB/POLR2J/VAPB/SUPT5H/NELFE	26										R-HSA-382556	ABC-family proteins mediated transport	21/1351	103/10704	0.0169159	0.0533099	0.0341322	UBA52/UBB/ABCA2/UBC/SEL1L/ABCA8/PSMB4/RPS27A/DERL1/PSMA4/PSME1/ABCB6/PSMD10/PSMD4/ABCA3/PSMD3/PSMB7/PSMB10/PSMF1/RNF5/PSMD13	21
AGAP1	1.05757e-173	0.220791	0.518	0.319	2.32813e-169	1.05757e-171	GO:1904645	response to amyloid-beta	17/2012	56/18866	4.66187e-05	0.000650919	0.000483156	APP/ATP1A3/PRNP/GJA1/DNM1/CACNA2D1/BACE1/TREM2/BCL2L2/CACNB1/GRM5/PSEN1/LGMN/PARP1/LRP1/CDK5/SNX6	17										R-HSA-1358803	Downregulation of ERBB2:ERBB3 signaling	5/1351	13/10704	0.0170764	0.0533099	0.0341322	UBA52/UBB/UBC/ERBB3/RPS27A	5
MRTFB	1.06799e-173	0.213836	0.866	0.766	2.35107e-169	1.06799e-171	GO:0009306	protein secretion	77/2012	462/18866	4.70731e-05	0.000655732	0.000486728	BAIAP3/SNCG/CANX/GAPDH/APOE/MIF/PSAP/STX1A/ARF1/CACNA1E/PPIA/APBB1/GJA1/PPP3CB/NNAT/SRCIN1/UQCC2/RAC1/RAB3B/PAFAH1B1/ARL2/CD22/ENSA/ERP29/HMGCR/PTPRN/RAB3C/TREM2/SEL1L/GPI/ACSL4/HLA-DRB1/RAB11FIP3/RBP4/NLGN2/CPLX3/MYO5A/DMTN/SYT4/PPID/CADM1/OLFM2/NR1D1/RAB8B/STX4/GLUD1/TMEM167A/ADCY5/RAPGEF4/M6PR/GNPTAB/DYSF/UBE2Q1/C2CD2L/PTPRN2/CD200/TMBIM6/PCLO/ARL2BP/PDIA4/PREB/CYP51A1/STXBP3/LRP1/SREBF1/SCAMP…	77										R-HSA-1679131	Trafficking and processing of endosomal TLR	5/1351	13/10704	0.0170764	0.0533099	0.0341322	HSP90B1/CTSB/CNPY3/CTSS/LGMN	5
MORF4L2	1.96638e-173	0.210238	0.946	0.88	4.32879e-169	1.96638e-171	GO:0021700	developmental maturation	53/2012	287/18866	4.75015e-05	0.00066016	0.000490015	C1QA/C3/SLC17A7/BAIAP3/YWHAZ/SYP/CNTN2/MTCH1/APP/CLSTN1/CX3CL1/CD63/NEUROD2/SEMA4D/EDNRB/SOX10/SIRT2/NEFL/PFN1/STXBP1/CDK5R1/NRCAM/NFASC/SOX8/OPA1/PTPRN/PLXNB1/BCAN/VEGFA/PICALM/PTEN/PALM/XYLT1/MYO5A/CDK5R2/SYT4/CTNNB1/PPP2R1A/BCL11A/SEZ6L/NEURL1/RBPJ/GRIN1/CEBPA/RHOA/NFIA/CAMK2B/NF1/ADGRB3/TUSC2/KCNIP2/YTHDF2/IGSF21	53										R-HSA-203615	eNOS activation	5/1351	13/10704	0.0170764	0.0533099	0.0341322	HSP90AA1/CALM3/CALM1/CALM2/DDAH1	5
KIF3C	5.35375e-173	0.198035	0.966	0.925	1.17858e-168	5.35375e-171	GO:0032984	protein-containing complex disassembly	59/2012	330/18866	4.83281e-05	0.00067009	0.000497386	STMN4/STMN1/SH3GL2/STMN3/DNAJC6/NSF/NAPB/CFL1/DDIT4/STMN2/SPTBN1/MTPN/LAMP2/MAP1LC3A/RPL23/CAPZB/KLC1/HSPA8/SPTAN1/NAPA/EIF5A/SMARCD3/SET/CLASP2/TAOK1/MID1IP1/CHMP1B/WDR1/PPP1CA/MRPL55/MAP6D1/CHMP1A/DMTN/CAPZA1/DSTN/BMERB1/CTNNB1/GABARAPL1/BNIP3/GBA/GABARAP/TRMT112/SYNJ1/MRPL52/CFL2/MRPS7/PDXP/ARHGEF2/RDX/DVL1/MRPL28/MRPL24/CLASP1/CAPG/APC2/IST1/KIF5B/PTCD3/MICAL3	59										R-HSA-209543	p75NTR recruits signalling complexes	5/1351	13/10704	0.0170764	0.0533099	0.0341322	UBA52/UBB/UBC/SQSTM1/RPS27A	5
SLIT3	5.7818e-173	0.16912	0.237	0.084	1.27281e-168	5.7818e-171	GO:0002431	Fc receptor mediated stimulatory signaling pathway	32/2012	145/18866	4.84602e-05	0.000670366	0.00049759	HSP90AA1/MAPK1/HSP90AB1/ACTB/FCER1G/PAK1/ARPC5/CYFIP2/RAC1/MAPK3/PTK2/PRKCD/ARPC4/FCGR3A/BAIAP2/CDC42/GRB2/ARPC3/PIK3R2/CD47/ACTR3/ARPC1B/NCKAP1/BRK1/ELMO2/PTPRJ/CRK/PRKCE/ACTR2/ELMO1/RAP1A/ARPC1A	32										R-HSA-209560	NF-kB is activated and signals survival	5/1351	13/10704	0.0170764	0.0533099	0.0341322	UBA52/UBB/UBC/SQSTM1/RPS27A	5
TUBB3	1.44441e-172	0.221868	0.877	0.781	3.17971e-168	1.44441e-170	GO:0030307	positive regulation of cell growth	36/2012	171/18866	4.90101e-05	0.000674849	0.000500918	CPNE6/SYT1/GDI1/SHTN1/MTPN/PAK1/SEMA4D/MAPT/EIF4G2/DBNL/PAFAH1B1/CYBA/RUFY3/SYT17/KRT17/CDC42/VEGFA/EIF4G1/S100A8/RASAL1/SYT4/PIN1/NEDD4L/S100A9/RHOA/CPNE5/EXTL3/LRP1/CDKL5/BMPR2/PSMD10/IST1/ADAM10/AKAP6/CSNK2A1/L1CAM	36										R-HSA-5210891	Uptake and function of anthrax toxins	5/1351	13/10704	0.0170764	0.0533099	0.0341322	CALM3/MAP2K1/CALM1/CALM2/MAP2K4	5
KIF1A	1.76145e-172	0.166419	0.997	0.988	3.87765e-168	1.76145e-170	GO:0140056	organelle localization by membrane tethering	36/2012	171/18866	4.90101e-05	0.000674849	0.000500918	TUBA1A/HSP90AA1/TUBB4A/TUBB/NSF/YWHAG/SYT1/YWHAE/STX1A/DYNLL1/DCTN1/NDRG4/STXBP1/RAB3B/PAFAH1B1/RAB3C/STX7/CCP110/SSNA1/DYNC1H1/PPP2R1A/SYTL2/RAB8B/STX4/TUBA4A/ACTR1A/CLASP1/YKT6/STXBP3/RAB15/PACS2/PPFIA3/VAPB/STX16/STX12/CSNK1E	36										R-HSA-5607763	CLEC7A (Dectin-1) induces NFAT activation	5/1351	13/10704	0.0170764	0.0533099	0.0341322	CALM3/CALM1/CALM2/PPP3CB/PPP3R1	5
MAPT	2.57045e-172	0.205872	0.865	0.763	5.65858e-168	2.57045e-170	GO:0050435	amyloid-beta metabolic process	16/2012	51/18866	4.9553e-05	0.000680756	0.000505303	APP/APOE/BIN1/ABCA2/PRNP/CLU/MGAT3/BACE1/PICALM/IFNGR1/PIN1/DYRK1A/PSEN1/SLC2A13/NCSTN/ADAM10	16										R-HSA-879415	Advanced glycosylation endproduct receptor signaling	5/1351	13/10704	0.0170764	0.0533099	0.0341322	MAPK1/APP/MAPK3/CAPZA1/PRKCSH	5
EVI2A	2.57872e-172	0.213352	0.249	0.094	5.6768e-168	2.57872e-170	GO:0035592	establishment of protein localization to extracellular region	77/2012	463/18866	5.06977e-05	0.000690311	0.000512395	BAIAP3/SNCG/CANX/GAPDH/APOE/MIF/PSAP/STX1A/ARF1/CACNA1E/PPIA/APBB1/GJA1/PPP3CB/NNAT/SRCIN1/UQCC2/RAC1/RAB3B/PAFAH1B1/ARL2/CD22/ENSA/ERP29/HMGCR/PTPRN/RAB3C/TREM2/SEL1L/GPI/ACSL4/HLA-DRB1/RAB11FIP3/RBP4/NLGN2/CPLX3/MYO5A/DMTN/SYT4/PPID/CADM1/OLFM2/NR1D1/RAB8B/STX4/GLUD1/TMEM167A/ADCY5/RAPGEF4/M6PR/GNPTAB/DYSF/UBE2Q1/C2CD2L/PTPRN2/CD200/TMBIM6/PCLO/ARL2BP/PDIA4/PREB/CYP51A1/STXBP3/LRP1/SREBF1/SCAMP…	77										R-HSA-8951664	Neddylation	41/1351	234/10704	0.0175545	0.0546766	0.0350072	UBA52/UBB/FBXL16/UBC/WSB2/SKP1/BTRC/ELOB/COPS7A/PSMB4/FBXW7/RPS27A/FBXO41/RBX1/DDA1/PSMA4/PSME1/COMMD7/KBTBD6/WSB1/FBXL5/DCAF7/FBXO11/FBXO44/PSMD10/FBXW4/TULP4/FBXL3/LMO7/FBXW11/PSMD4/KEAP1/BTBD1/CUL3/PSMD3/COPS8/PSMB7/PSMB10/PSMF1/PSMD13/UBE2D2	41
EIF4G2	1.09085e-171	0.204255	0.947	0.896	2.4014e-167	1.09085e-169	GO:0006735	NADH regeneration	11/2012	27/18866	5.07106e-05	0.000690311	0.000512395	TPI1/GAPDH/PGM2L1/PKM/ENO1/PGAM2/PFKP/HK1/GPI/ENO2/PGAM1	11										R-HSA-70326	Glucose metabolism	19/1351	91/10704	0.017627	0.0547768	0.0350714	TPI1/GAPDH/PGM2L1/PKM/PPP2CB/ENO1/PGAM2/PPP2CA/PFKP/PRKACB/HK1/GPI/ENO2/PPP2R1A/PGAM1/SLC25A1/SEH1L/MDH2/SLC25A11	19
TEF	1.21827e-171	0.224007	0.593	0.404	2.68189e-167	1.21827e-169	GO:0061621	canonical glycolysis	11/2012	27/18866	5.07106e-05	0.000690311	0.000512395	TPI1/GAPDH/PGM2L1/PKM/ENO1/PGAM2/PFKP/HK1/GPI/ENO2/PGAM1	11										R-HSA-5632684	Hedgehog 'on' state	18/1351	85/10704	0.0178874	0.0554591	0.0355083	UBA52/UBB/HHIP/UBC/ARRB2/PSMB4/RPS27A/RBX1/PSMA4/PSME1/PSMD10/PSMD4/CUL3/PSMD3/PSMB7/PSMB10/PSMF1/PSMD13	18
RPL23	1.19737e-170	0.197928	0.958	0.933	2.6359e-166	1.19737e-168	GO:0061718	glucose catabolic process to pyruvate	11/2012	27/18866	5.07106e-05	0.000690311	0.000512395	TPI1/GAPDH/PGM2L1/PKM/ENO1/PGAM2/PFKP/HK1/GPI/ENO2/PGAM1	11										R-HSA-163359	Glucagon signaling in metabolic regulation	9/1351	33/10704	0.0181308	0.0559565	0.0358267	GNG2/PRKAR1A/GNG7/PRKACB/GNG3/GNB1/PRKAR1B/ADCY1/ADCY5	9
CD24	2.06521e-170	0.201194	0.256	0.099	4.54636e-166	2.06521e-168	GO:0002433	immune response-regulating cell surface receptor signaling pathway involved in phagocytosis	31/2012	139/18866	5.11076e-05	0.00069256	0.000514064	HSP90AA1/MAPK1/HSP90AB1/ACTB/PAK1/ARPC5/CYFIP2/RAC1/MAPK3/PTK2/PRKCD/ARPC4/FCGR3A/BAIAP2/CDC42/GRB2/ARPC3/PIK3R2/CD47/ACTR3/ARPC1B/NCKAP1/BRK1/ELMO2/PTPRJ/CRK/PRKCE/ACTR2/ELMO1/RAP1A/ARPC1A	31										R-HSA-9022692	Regulation of MECP2 expression and activity	9/1351	33/10704	0.0181308	0.0559565	0.0358267	HIPK2/CALM3/CAMK2D/CALM1/CALM2/TBL1XR1/NCOR2/CAMK2B/HDAC2	9
KIF1B	2.16553e-170	0.207261	0.933	0.875	4.7672e-166	2.16553e-168	GO:0038096	Fc-gamma receptor signaling pathway involved in phagocytosis	31/2012	139/18866	5.11076e-05	0.00069256	0.000514064	HSP90AA1/MAPK1/HSP90AB1/ACTB/PAK1/ARPC5/CYFIP2/RAC1/MAPK3/PTK2/PRKCD/ARPC4/FCGR3A/BAIAP2/CDC42/GRB2/ARPC3/PIK3R2/CD47/ACTR3/ARPC1B/NCKAP1/BRK1/ELMO2/PTPRJ/CRK/PRKCE/ACTR2/ELMO1/RAP1A/ARPC1A	31										R-HSA-166016	Toll Like Receptor 4 (TLR4) Cascade	25/1351	129/10704	0.0181714	0.0559565	0.0358267	MAPK1/MAP2K1/APP/UBA52/UBB/ITGB2/DNM1/PPP2CB/ELK1/MAPK3/UBC/PPP2CA/SKP1/BTRC/PPP2R1A/UBE2N/JUN/RPS27A/RPS6KA2/DUSP7/MAPK14/MAP2K4/FBXW11/DNM2/UBE2D2	25
CTNND2	5.31022e-170	0.20056	0.885	0.793	1.16899e-165	5.31022e-168	GO:0150115	cell-substrate junction organization	25/2012	102/18866	5.22399e-05	0.000706303	0.000524266	APOD/MAP4K4/THY1/MAPRE2/S100A10/GPM6B/RAC1/PTK2/ITGB4/FAM107A/CLASP2/VEGFA/PTEN/DMTN/LIMCH1/DST/IQSEC1/CD151/RHOA/CLASP1/DUSP22/LRP1/PTPRJ/TLN1/PTPRK	25										R-HSA-6811438	Intra-Golgi traffic	11/1351	44/10704	0.0183093	0.0562536	0.036017	NSF/NAPB/ARF1/NAPA/MAN2A1/COG1/MAN1A1/YKT6/STX16/NAPG/CYTH1	11
CELF5	1.17212e-169	0.231727	0.596	0.408	2.5803e-165	1.17212e-167	GO:0034599	cellular response to oxidative stress	56/2012	310/18866	5.5516e-05	0.000748902	0.000555886	HSPB1/SOD2/HSPA1A/SNCA/MAPK1/SOD1/PSAP/AIF1/MGST1/AQP1/ATP2A2/MAP1LC3A/GPR37/SIRT2/MAPT/RACK1/SIRPA/TXN/RPS3/AGAP3/CYBA/MAPK3/MGAT3/ARL6IP5/ATF4/PRKCD/NQO1/PRDX1/HSPA1B/CPEB2/GUCY1B1/CTNNB1/BNIP3/GSKIP/SFPQ/FBXW7/STX4/JUN/HSF1/ETV5/LONP1/NCOA7/STAU1/PARP1/NFE2L1/GSTP1/P4HB/CRK/MPV17/MDM2/HDAC2/KEAP1/VKORC1L1/TPM1/PTPRK/DNM2	56										R-HSA-1855204	Synthesis of IP3 and IP4 in the cytosol	8/1351	28/10704	0.0191914	0.0585662	0.0374976	CALM3/CALM1/CALM2/PTEN/ITPKB/SYNJ1/PLCD3/ITPK1	8
RACK1	1.98021e-169	0.201787	0.944	0.903	4.35923e-165	1.98021e-167	GO:0006446	regulation of translational initiation	21/2012	79/18866	5.74273e-05	0.00076826	0.000570254	HSPB1/RPL13A/EIF1/EIF4A2/UHMK1/EIF4G2/EIF4H/EIF5/ATF4/EIF4G1/RBM4/LARP1/PPP1CA/PAIP2B/EIF3B/CTIF/EIF4B/EIF3E/YTHDF3/YTHDF2/EIF1B	21										R-HSA-202040	G-protein activation	8/1351	28/10704	0.0191914	0.0585662	0.0374976	GNAO1/GNG2/GNAZ/PDYN/GNG7/GNG3/GNB1/GNAI1	8
SIRPA	4.42056e-169	0.197467	0.96	0.912	9.73142e-165	4.42056e-167	GO:0007035	vacuolar acidification	10/2012	23/18866	5.74652e-05	0.00076826	0.000570254	ATP6V1H/CLIC4/ATP6AP2/ATP6V0E2/ATP6V0A1/ATP6V0D1/GRN/ROGDI/PPT1/DMXL2	10										R-HSA-350054	Notch-HLH transcription pathway	8/1351	28/10704	0.0191914	0.0585662	0.0374976	KAT2A/HDAC11/TBL1XR1/RBPJ/HDAC5/NCOR2/HDAC4/HDAC2	8
FEZ1	7.75123e-169	0.24664	0.841	0.756	1.70635e-164	7.75123e-167	GO:0007097	nuclear migration	10/2012	23/18866	5.74652e-05	0.00076826	0.000570254	SLIT1/SUN2/DCTN1/KIF1A/PAFAH1B1/PTK2/CDC42/CLMN/DYNC1H1/FBXW11	10										R-HSA-881907	Gastrin-CREB signalling pathway via PKC and MAPK	6/1351	18/10704	0.019318	0.0587485	0.0376143	MAPK1/MAPK3/HRAS/GRB2/CCKBR/RPS6KA2	6
IRF2BP2	1.70735e-168	0.222229	0.535	0.338	3.75856e-164	1.70735e-166	GO:0010288	response to lead ion	10/2012	23/18866	5.74652e-05	0.00076826	0.000570254	QDPR/APP/PPP2CB/MAP1LC3A/MAPT/BACE1/PPP2CA/PPP1CA/CPOX/ALAD	10										R-HSA-1227986	Signaling by ERBB2	12/1351	50/10704	0.0193377	0.0587485	0.0376143	HSP90AA1/UBA52/UBB/ERBIN/HRAS/UBC/ERBB3/PRKCD/GRB2/RPS27A/RHOA/PRKCE	12
PTGER3	7.85054e-168	0.108117	0.106	0.009	1.72822e-163	7.85054e-166	GO:0097120	receptor localization to synapse	17/2012	57/18866	5.98888e-05	0.000798874	0.000592978	CLSTN1/CNIH2/TYROBP/CACNG3/NPTN/HRAS/KIF5C/PRKCZ/STX7/DLG2/DLG1/IQSEC2/LRRC7/ANKS1B/ADAM10/KIF5B/RAP1A	17										R-HSA-174154	APC/C:Cdc20 mediated degradation of Securin	15/1351	68/10704	0.0205286	0.0622275	0.0398418	UBA52/UBB/UBC/PSMB4/RPS27A/PSMA4/PSME1/PSMD10/PSMD4/PSMD3/PSMB7/ANAPC16/PSMB10/PSMF1/PSMD13	15
CAP2	1.15513e-167	0.233397	0.729	0.598	2.54289e-163	1.15513e-165	GO:0046890	regulation of lipid biosynthetic process	41/2012	207/18866	6.69518e-05	0.0008911	0.000661434	C3/CD74/APOC1/FABP3/APOE/SOD1/DKK3/ABCA2/SREBF2/RACK1/SCD/APOC2/AGAP2/FGF1/ADIPOR1/HMGCR/PRKCD/TSPO/RAN/ABHD6/MID1IP1/CTDNEP1/ELOVL5/ADIPOR2/FBXW7/NR1D1/FASN/PRKAG2/ASAH1/CYP51A1/DHCR7/SREBF1/SLC27A1/SCAP/POR/HMGCS1/LSS/SAMD8/LPGAT1/SF1/KPNB1	41										R-HSA-68886	M Phase	67/1351	418/10704	0.0219551	0.0664031	0.0425153	TUBA1A/HSP90AA1/MAPK1/TUBA1B/TUBB4A/TUBB/ARPP19/TUBB2A/UBA52/YWHAG/YWHAE/UBB/DYNLL1/XPO1/DCTN1/PPP2CB/SIRT2/TUBB3/PAFAH1B1/MAPK3/RAB2A/ENSA/DYNLL2/UBC/PPP2CA/RANGAP1/MZT2A/DYNC1LI2/SET/CLASP2/TAOK1/RAN/CTDNEP1/CCP110/SSNA1/DYNC1H1/NUDC/PSMB4/PPP1CC/PPP2R1A/TUBA4A/RPS27A/DYNC1I1/ACTR1A/MZT2B/CLASP1/PSMA4/PSME1/BANF1/NEK7/PSMD10/SEH1L/IST1/CSNK2A1/PSMD4/UBE2I/RAB1A/PSMD3/PSMB7/ANAPC16/PPP2R5C/CSNK1…	67
ZCCHC17	1.36029e-167	0.220487	0.532	0.339	2.99455e-163	1.36029e-165	GO:0097242	amyloid-beta clearance	13/2012	37/18866	6.71592e-05	0.000891875	0.000662009	C3/APOE/ITGB2/CLU/LRPAP1/CLTC/HMGCR/TREM2/PICALM/IFNGR1/CYP51A1/LRP1/RAB5A	13										R-HSA-381426	Regulation of Insulin-like Growth Factor (IGF) transport and uptake by Insulin-like Growth Factor Binding Proteins (IGFBPs)	24/1351	125/10704	0.0226012	0.0682054	0.0436692	SPP1/TF/C3/HSP90B1/APP/APOE/PDIA6/TMEM132A/IGFBP5/TIMP1/NUCB1/SERPINA1/APLP2/RCN1/VWA1/PRKCSH/TGOLN2/VCAN/QSOX1/SHISA5/P4HB/ADAM10/VGF/CDH2	24
PPIB	1.72214e-167	0.219772	0.541	0.342	3.79111e-163	1.72214e-165	GO:0035722	interleukin-12-mediated signaling pathway	15/2012	47/18866	6.78694e-05	0.000899307	0.000667526	SOD2/MIF/SOD1/CFL1/ARF1/PPIA/RPLP0/HNRNPA2B1/CDC42/HSPA9/CAPZA1/TCP1/P4HB/AIP/HNRNPDL	15										R-HSA-176408	Regulation of APC/C activators between G1/S and early anaphase	17/1351	81/10704	0.0227983	0.0686477	0.0439524	UBA52/UBB/UBC/SKP1/BTRC/PSMB4/RPS27A/PSMA4/PSME1/PSMD10/PSMD4/PSMD3/PSMB7/ANAPC16/PSMB10/PSMF1/PSMD13	17
DDRGK1	5.06634e-167	0.222066	0.514	0.32	1.1153e-162	5.06634e-165	GO:0030010	establishment of cell polarity	31/2012	141/18866	6.80665e-05	0.000899923	0.000667983	HSP90AA1/HSP90AB1/CFL1/SHTN1/MAP2/GJA1/PAK1/DCTN1/MAP4/FSCN1/RACK1/FEZ1/JAM3/PAFAH1B1/PTK2/RUFY3/CDC42/RIPOR2/PRKCZ/CRKL/SNX27/ARHGEF2/RHOA/CLASP1/CRK/FBXW11/FAM89B/CYTH1/FLOT2/NSFL1C/MYH9	31										R-HSA-375165	NCAM signaling for neurite out-growth	14/1351	63/10704	0.0232592	0.0695247	0.0445139	MAPK1/CNTN2/NCAM1/PRNP/SPTBN1/MAPK3/PTK2/HRAS/SPTAN1/PTPRA/GRB2/NCAN/CACNB1/CACNA1I	14
RPS8	6.77572e-167	0.166339	0.998	0.997	1.49161e-162	6.77572e-165	GO:0051893	regulation of focal adhesion assembly	18/2012	63/18866	6.87861e-05	0.000905431	0.000672072	APOD/MAP4K4/THY1/S100A10/GPM6B/RAC1/PTK2/FAM107A/CLASP2/VEGFA/PTEN/DMTN/LIMCH1/RHOA/CLASP1/DUSP22/LRP1/PTPRJ	18										R-HSA-5218920	VEGFR2 mediated vascular permeability	8/1351	29/10704	0.0236527	0.0695247	0.0445139	HSP90AA1/CALM3/CALM1/CALM2/PAK1/RAC1/PAK3/CTNNB1	8
TXN	9.8574e-167	0.208596	0.834	0.728	2.17001e-162	9.8574e-165	GO:0090109	regulation of cell-substrate junction assembly	18/2012	63/18866	6.87861e-05	0.000905431	0.000672072	APOD/MAP4K4/THY1/S100A10/GPM6B/RAC1/PTK2/FAM107A/CLASP2/VEGFA/PTEN/DMTN/LIMCH1/RHOA/CLASP1/DUSP22/LRP1/PTPRJ	18										R-HSA-8982491	Glycogen metabolism	8/1351	29/10704	0.0236527	0.0695247	0.0445139	CALM3/UBA52/CALM1/UBB/CALM2/PGM2L1/UBC/RPS27A	8
OLIG2	1.24279e-166	0.213331	0.296	0.131	2.73588e-162	1.24279e-164	GO:0031397	negative regulation of protein ubiquitination	21/2012	80/18866	7.01327e-05	0.000921128	0.000683723	HSPA1A/PRKCG/DNAJA1/RPL5/RPL11/RPL23/RPS3/ARRB2/TSPO/IVNS1ABP/CHP1/HSPA1B/SQSTM1/PSEN1/DYSF/TRIP12/OTUB1/CDK5/PRKCE/ISG15/UBXN1	21										R-HSA-9645723	Diseases of programmed cell death	8/1351	29/10704	0.0236527	0.0695247	0.0445139	SOD2/APP/YWHAE/CDK5R1/CAPNS1/PRDX1/JUN/CDK5	8
SCD	1.76066e-166	0.354262	0.87	0.816	3.87592e-162	1.76066e-164	GO:1903532	positive regulation of secretion by cell	56/2012	313/18866	7.28388e-05	0.000954572	0.000708548	SPP1/BAIAP3/SNCA/GAPDH/SYT1/MIF/STX1A/ARF1/PPIA/FCER1G/APBB1/GJA1/ATP6AP1/PPP3CB/ITGB2/NNAT/STXBP1/RAB7A/RAC1/NCS1/RAB27B/LAMP1/TREM2/CLASP2/GPI/ACSL4/HLA-DRB1/APLN/RBP4/DTNBP1/NLGN2/CDK5R2/CHRNB2/SYT4/PPID/CADM1/CACNA1I/RAB8B/STX4/GLUD1/HGS/C2CD2L/CLASP1/CADPS/LRP1/SCAMP5/SYT7/RAB15/TARDBP/CDK5/RAB5A/PRKCE/RAB3GAP1/KIF5B/AACS/SLC12A2	56										R-HSA-9694548	Maturation of spike protein	8/1351	29/10704	0.0236527	0.0695247	0.0445139	CANX/TUSC3/MAN2A1/PRKCSH/RPN2/ST6GAL1/RPN1/GANAB	8
ERBIN	3.63679e-166	0.242705	0.48	0.295	8.00604e-162	3.63679e-164	GO:0034767	positive regulation of ion transmembrane transport	34/2012	161/18866	7.34239e-05	0.000958302	0.000711316	SNCA/THY1/TMSB4X/CALM3/CALM1/CALM2/ANK2/APLNR/ARF1/ATP1B1/ATP1B2/CX3CL1/ARL6IP1/CACNG3/CACNA2D1/CAPN3/WNK1/STIM1/HSPA2/TREM2/ANK3/CHP1/CTSS/NLGN3/FLNA/STK39/PSEN1/EHD3/CDK5/KCNIP2/ANTKMT/AKAP6/KIF5B/DNM2	34										R-HSA-166786	Creation of C4 and C2 activators	5/1351	14/10704	0.0238575	0.0695247	0.0445139	C1QB/C1QA/C1QC/C1R/C1S	5
NDRG4	7.44867e-166	0.183609	0.984	0.962	1.63975e-161	7.44867e-164	GO:0031644	regulation of nervous system process	32/2012	148/18866	7.3624e-05	0.000958302	0.000711316	NPTXR/NPTX1/APP/TPPP/MAG/STX1A/MYRF/SLC8A2/CNIH2/EDNRB/SOX10/NPTX2/ZNF488/SHISA9/TNR/BAIAP2/PRKCZ/PTEN/NLGN2/RGS4/DLGAP4/NLGN3/GBA/ADORA1/GRIN1/TENM4/CELF4/SHISA7/DVL1/RNF10/TMEM25/COMT	32										R-HSA-174490	Membrane binding and targetting of GAG proteins	5/1351	14/10704	0.0238575	0.0695247	0.0445139	UBA52/UBB/UBC/RPS27A/MVB12B	5
PTPRZ1	1.16547e-165	0.229469	0.763	0.629	2.56566e-161	1.16547e-163	GO:0071901	negative regulation of protein serine/threonine kinase activity	32/2012	148/18866	7.3624e-05	0.000958302	0.000711316	HSPB1/DNAJA1/UCHL1/APOE/YWHAG/SPRED1/PRKAR1A/MAPK8IP1/RGS14/PPP2CA/HMGCR/PRKCD/PKIA/CHORDC1/IPO7/PTEN/DTNBP1/RGS4/PRKAR1B/PPP2R1A/GBA/CDKN1C/CEBPA/SMPD1/PRKAG2/NF1/GSTP1/DUSP7/PTPRJ/CDK5RAP3/HEXIM1/IPO5	32										R-HSA-174495	Synthesis And Processing Of GAG, GAGPOL Polyproteins	5/1351	14/10704	0.0238575	0.0695247	0.0445139	UBA52/UBB/UBC/RPS27A/MVB12B	5
ADGRL3	3.71263e-165	0.216314	0.479	0.288	8.17299e-161	3.71263e-163	GO:1903321	negative regulation of protein modification by small protein conjugation or removal	23/2012	92/18866	7.39252e-05	0.000958302	0.000711316	HSPA1A/PRKCG/DNAJA1/RPL5/RPL11/RPL23/RPS3/CAPN3/ARRB2/TSPO/IVNS1ABP/CHP1/HSPA1B/CTNNB1/SQSTM1/PSEN1/DYSF/TRIP12/OTUB1/CDK5/PRKCE/ISG15/UBXN1	23										R-HSA-2024101	CS/DS degradation	5/1351	14/10704	0.0238575	0.0695247	0.0445139	IDS/BCAN/NCAN/BGN/VCAN	5
GUK1	6.64408e-165	0.175044	0.983	0.97	1.46263e-160	6.64408e-163	GO:1905897	regulation of response to endoplasmic reticulum stress	23/2012	92/18866	7.39252e-05	0.000958302	0.000711316	NUPR1/HSPA1A/BOK/HSPA5/CLU/RACK1/DDRGK1/SERINC3/ERP29/BCAP31/OPA1/HYOU1/USP14/MANF/TMBIM6/TMEM33/NFE2L1/SGTA/BCL2L1/HERPUD1/SVIP/UBXN1/TMEM259	23										R-HSA-399955	SEMA3A-Plexin repulsion signaling by inhibiting Integrin adhesion	5/1351	14/10704	0.0238575	0.0695247	0.0445139	RAC1/PIP5K1C/PLXNA2/PLXNA1/TLN1	5
ATP6V1G2	1.16289e-164	0.208517	0.87	0.771	2.55999e-160	1.16289e-162	GO:0051647	nucleus localization	11/2012	28/18866	7.55009e-05	0.0009745	0.000723339	SLIT1/BIN1/SUN2/DCTN1/KIF1A/PAFAH1B1/PTK2/CDC42/CLMN/DYNC1H1/FBXW11	11										R-HSA-9005891	Loss of function of MECP2 in Rett syndrome	5/1351	14/10704	0.0238575	0.0695247	0.0445139	CALM3/CALM1/CALM2/TBL1XR1/NCOR2	5
STXBP1	2.21367e-164	0.170924	0.997	0.989	4.87317e-160	2.21367e-162	GO:0061620	glycolytic process through glucose-6-phosphate	11/2012	28/18866	7.55009e-05	0.0009745	0.000723339	TPI1/GAPDH/PGM2L1/PKM/ENO1/PGAM2/PFKP/HK1/GPI/ENO2/PGAM1	11										R-HSA-9005895	Pervasive developmental disorders	5/1351	14/10704	0.0238575	0.0695247	0.0445139	CALM3/CALM1/CALM2/TBL1XR1/NCOR2	5
FAM107B	2.45728e-164	0.217947	0.256	0.102	5.40945e-160	2.45728e-162	GO:0007004	telomere maintenance via telomerase	19/2012	69/18866	7.60032e-05	0.000978868	0.000726582	HSP90AA1/MAPK1/HSP90AB1/PTGES3/HNRNPC/HNRNPA1/MAPK3/CCT5/NOP10/TERF2IP/CTNNB1/TCP1/CCT2/NHP2/HNRNPU/NEK7/TNKS2/CCT7/CCT3	19										R-HSA-9675151	Disorders of Developmental Biology	5/1351	14/10704	0.0238575	0.0695247	0.0445139	CALM3/CALM1/CALM2/TBL1XR1/NCOR2	5
PPP2R2C	3.88515e-164	0.201765	0.866	0.773	8.55276e-160	3.88515e-162	GO:0006839	mitochondrial transport	50/2012	271/18866	7.85491e-05	0.00100948	0.000749306	CNP/HSP90AA1/HSPA1A/YWHAZ/YWHAH/YWHAB/YWHAG/YWHAE/SREBF2/HSPD1/YWHAQ/SLC25A22/ATP5ME/BOK/HSPA4/ATP5IF1/OPA1/BAG4/TSPO/PDCD5/MID1IP1/GDAP1/RHOU/BCL2L2/TOMM34/BNIP3/UBL5/FBXW7/BAP1/TOMM70/SLC25A23/PSEN1/ATP5MC2/ATP5MF/PRKAG2/TOMM22/TOMM20/SLC25A1/MICU3/PPP3R1/SREBF1/SLC25A46/AIP/HAX1/NMT1/BCL2L1/ANTKMT/RHOT1/SFXN1/BNIP3L	50										R-HSA-9697154	Disorders of Nervous System Development	5/1351	14/10704	0.0238575	0.0695247	0.0445139	CALM3/CALM1/CALM2/TBL1XR1/NCOR2	5
RPS23	5.60962e-164	0.174926	0.998	0.996	1.2349e-159	5.60962e-162	GO:0031334	positive regulation of protein-containing complex assembly	48/2012	257/18866	7.93011e-05	0.00101696	0.000754856	HSP90AA1/HSPA1A/SNCA/TPPP/BIN1/ARF1/CORO1A/PAK1/DCTN1/FSCN1/ARPC5/PFN1/CLU/MAPT/RACK1/CDK5R1/RPS3/RAC1/ARL2/BAG4/ARPC4/EVL/BAIAP2/VEGFA/EIF4G1/HSPA1B/GRB2/ARPC3/GMFB/ACTR3B/DLG1/ABI2/ACTR3/PSRC1/ARPC1B/NCKAP1/CDC42EP1/RBX1/BRK1/RHOA/PARP1/CLASP1/PRKCE/ACTR2/SLF2/RHOC/ARPC1A/TPPP3	48										R-HSA-975110	TRAF6 mediated IRF7 activation in TLR7/8 or 9 signaling	5/1351	14/10704	0.0238575	0.0695247	0.0445139	UBA52/UBB/UBC/UBE2N/RPS27A	5
RAP1GAP	1.09944e-163	0.214186	0.855	0.746	2.4203e-159	1.09944e-161	GO:0043434	response to peptide hormone	74/2012	447/18866	8.18289e-05	0.00104713	0.00077725	QDPR/FABP3/ATP6V0C/YWHAG/CACYBP/GJA1/ATP6AP1/ATP6V1H/PKM/PAK1/ATP6V1B2/EDNRB/VAMP2/NEFL/PRKAR1A/ATP6V1G2/CYBA/PTK2/BSG/ATP6V1A/AP3S1/ATP6V0E2/ATP6V0A1/ATP6V0B/ATP6V1C1/IGFBP5/ADIPOR1/ATP6V1E1/OPA1/ATP6V0D1/PTPRN/PRKCD/PRKACB/TIMP1/BCAR1/PTPRA/RANGAP1/CA2/BAIAP2/ATP6V1F/JUND/PRKCZ/PTEN/GRB2/MYO5A/GNAI1/CPEB2/SORT1/PRKAR1B/PIK3R2/SRSF6/RAB8B/ATP6V1D/ADCY1/ADCY5/HDAC5/HSF1/PID1/NUCKS1/PARP1/GSTP1/ST…	74										R-HSA-163560	Triglyceride catabolism	7/1351	24/10704	0.0249187	0.0724616	0.0463943	FABP3/PRKACB/PPP1CA/PPP1CC/PPP1CB/GPD2/FABP7	7
LRPAP1	7.87717e-163	0.21371	0.801	0.689	1.73408e-158	7.87717e-161	GO:0018107	peptidyl-threonine phosphorylation	27/2012	117/18866	8.22162e-05	0.00104754	0.000777558	CHI3L1/HIPK2/MAPK1/CALM3/CAMK2D/MAP2K1/APP/CALM1/CALM2/DDIT4/SIRT2/SPRED1/CDK5R1/WNK1/PRKCD/EIF4G1/DMTN/DYRK1A/STK39/CADM4/UBE2K/PRKAG2/CDC42BPA/CDK5/CLK1/ACVR1B/CSNK2A1	27										R-HSA-888590	GABA synthesis, release, reuptake and degradation	6/1351	19/10704	0.0252923	0.0733909	0.0469893	SYT1/STX1A/VAMP2/STXBP1/HSPA8/DNAJC5	6
PHACTR3	1.3567e-162	0.216102	0.522	0.333	2.98663e-158	1.3567e-160	GO:0043666	regulation of phosphoprotein phosphatase activity	27/2012	117/18866	8.22162e-05	0.00104754	0.000777558	PPP1R14A/HSP90B1/HSP90AB1/CALM3/ARPP19/CALM1/CALM2/FKBP1A/PPP2R2C/PHACTR3/ENSA/PTPA/ELFN2/SET/SLC39A10/PPP6R1/PPP2R1A/PPP1R16B/PPP4R4/B3GAT3/PPP1R10/CABIN1/PPP1R11/FKBP1B/PPP1R37/PPP2R5C/PPP2R2B	27										R-HSA-71387	Metabolism of carbohydrates	49/1351	295/10704	0.0256817	0.074362	0.047611	CALM3/TPI1/GAPDH/UBA52/IDS/CALM1/UBB/CALM2/PGM2L1/PKM/PPP2CB/ENO1/PRPS1/CD44/B4GAT1/PGAM2/UBC/PPP2CA/B3GAT1/PFKP/TKT/CHST1/B3GALT2/PRKACB/TKFC/HK1/GPI/BCAN/CHP1/XYLT1/ENO2/NCAN/HS3ST4/PPP2R1A/RPS27A/BGN/MAN2C1/CHPF/HS3ST2/PGAM1/VCAN/B3GAT3/SLC25A1/PAPSS1/SEH1L/FUT9/SDC3/MDH2/SLC25A11	49
BAALC	1.78361e-162	0.202816	0.945	0.904	3.92645e-158	1.78361e-160	GO:0031098	stress-activated protein kinase signaling cascade	54/2012	300/18866	8.23872e-05	0.00104754	0.000777558	CRYAB/TF/MAP4K4/HIPK2/MAPK1/MTURN/MAP2K1/DNAJA1/APP/UBA52/UBB/PAK1/MAPK8IP1/SIRPA/RPS3/DBNL/PAFAH1B1/MAPK3/HRAS/UBC/RASSF2/ARL6IP5/MAPK8IP3/PJA2/EMC10/HMGCR/SKP1/RASGRP1/CDC42/BTRC/ANKRD6/VEGFA/TAOK1/PAK3/PRDX1/ZEB2/DTNBP1/DLG1/CRKL/UBE2N/RNF13/RPS27A/RHOA/KLHDC10/GSTP1/DUSP22/MAP4K5/RAP2A/MAPK14/MAP2K4/FBXW11/CYLD/PHLPP1/MINK1	54										R-HSA-4608870	Asymmetric localization of PCP proteins	14/1351	64/10704	0.0264308	0.0763681	0.0488955	UBA52/UBB/UBC/PSMB4/RPS27A/PSMA4/PSME1/PSMD10/PSMD4/PSMD3/PSMB7/PSMB10/PSMF1/PSMD13	14
PLLP	2.10367e-162	0.235449	0.347	0.175	4.63101e-158	2.10367e-160	GO:0099172	presynapse organization	16/2012	53/18866	8.33867e-05	0.001058	0.000785321	SNCA/APP/PCDH17/BSN/LRRTM1/EIF4G1/PTEN/NLGN2/NLGN3/CLSTN3/PCLO/DVL1/PTPRD/SLITRK1/PPFIA2/LRRC4B	16										R-HSA-1852241	Organelle biogenesis and maintenance	49/1351	296/10704	0.027138	0.0782449	0.0500971	TUBA1A/SOD2/HSP90AA1/TUBA1B/CALM3/TUBB4A/TUBB/TUBB2A/YWHAG/CALM1/YWHAE/CALM2/DYNLL1/DCTN1/ATP5ME/KIF3C/TUBB3/PAFAH1B1/DYNLL2/MICOS10/SMARCD3/CCT5/RAB11FIP3/CCP110/SSNA1/HSPA9/DYNC1H1/TCP1/DYNLRB1/PPP2R1A/TBL1XR1/NR1D1/GLUD1/KIFAP3/TUBA4A/CCT2/ATP5MC2/ACTR1A/ATP5MF/PRKAG2/CLASP1/EXOC7/SEPTIN2/EXOC5/MEF2D/MAPK14/CSNK1E/CCT3/TUBB2B	49
RPL35	2.39654e-162	0.171277	0.996	0.993	5.27574e-158	2.39654e-160	GO:0071692	protein localization to extracellular region	77/2012	470/18866	8.42115e-05	0.0010662	0.000791408	BAIAP3/SNCG/CANX/GAPDH/APOE/MIF/PSAP/STX1A/ARF1/CACNA1E/PPIA/APBB1/GJA1/PPP3CB/NNAT/SRCIN1/UQCC2/RAC1/RAB3B/PAFAH1B1/ARL2/CD22/ENSA/ERP29/HMGCR/PTPRN/RAB3C/TREM2/SEL1L/GPI/ACSL4/HLA-DRB1/RAB11FIP3/RBP4/NLGN2/CPLX3/MYO5A/DMTN/SYT4/PPID/CADM1/OLFM2/NR1D1/RAB8B/STX4/GLUD1/TMEM167A/ADCY5/RAPGEF4/M6PR/GNPTAB/DYSF/UBE2Q1/C2CD2L/PTPRN2/CD200/TMBIM6/PCLO/ARL2BP/PDIA4/PREB/CYP51A1/STXBP3/LRP1/SREBF1/SCAMP…	77										R-HSA-381183	ATF6 (ATF6-alpha) activates chaperone genes	4/1351	10/10704	0.0283022	0.0807444	0.0516974	HSP90B1/CALR/HSPA5/ATF4	4
CDK5R1	2.80453e-162	0.213105	0.883	0.794	6.17388e-158	2.80453e-160	GO:0010833	telomere maintenance via telomere lengthening	21/2012	81/18866	8.52779e-05	0.00107515	0.000798048	HSP90AA1/MAPK1/HSP90AB1/PTGES3/HNRNPC/HNRNPA2B1/HNRNPA1/MAPK3/CCT5/NOP10/TERF2IP/CTNNB1/TCP1/CCT2/PARP1/NHP2/HNRNPU/NEK7/TNKS2/CCT7/CCT3	21										R-HSA-442729	CREB1 phosphorylation through the activation of CaMKII/CaMKK/CaMKIV cascasde	4/1351	10/10704	0.0283022	0.0807444	0.0516974	CALM3/CALM1/CALM2/CAMK2B	4
SLC26A4-AS1	3.59058e-162	0.214028	0.467	0.279	7.9043e-158	3.59058e-160	GO:0033238	regulation of cellular amine metabolic process	21/2012	81/18866	8.52779e-05	0.00107515	0.000798048	ATP2B4/OAZ1/MAOB/ITGB2/GPR37/NQO1/AZIN1/CHRNB2/PSMB4/PSMA4/PSME1/COMT/PSMD10/PSMD4/PSMD3/PSMB7/PSMB10/PSMF1/ATCAY/PSMD13/HPRT1	21										R-HSA-450341	Activation of the AP-1 family of transcription factors	4/1351	10/10704	0.0283022	0.0807444	0.0516974	MAPK1/MAPK3/JUN/MAPK14	4
KLK6	7.08997e-162	0.172357	0.181	0.052	1.56079e-157	7.08997e-160	GO:0051932	synaptic transmission, GABAergic	15/2012	48/18866	8.90635e-05	0.0011165	0.000828738	GABRA5/BAIAP3/STXBP1/PHF24/CA2/PTEN/NLGN2/ADORA1/CLSTN3/NISCH/NF1/PRKCE/USP46/KIF5B/GABRA2	15										R-HSA-8963888	Chylomicron assembly	4/1351	10/10704	0.0283022	0.0807444	0.0516974	APOE/APOC2/P4HB/SAR1B	4
ARHGDIG	1.07256e-161	0.200406	0.88	0.779	2.36114e-157	1.07256e-159	GO:0032469	endoplasmic reticulum calcium ion homeostasis	10/2012	24/18866	8.91179e-05	0.0011165	0.000828738	CAMK2D/APP/ATP2A2/BCAP31/KCTD17/PSEN1/RAP1GDS1/TMBIM6/PACS2/HERPUD1	10										R-HSA-937042	IRAK2 mediated activation of TAK1 complex	4/1351	10/10704	0.0283022	0.0807444	0.0516974	UBA52/UBB/UBC/RPS27A	4
CYFIP2	2.4999e-161	0.207673	0.925	0.866	5.50328e-157	2.4999e-159	GO:0086064	cell communication by electrical coupling involved in cardiac conduction	10/2012	24/18866	8.91179e-05	0.0011165	0.000828738	CALM3/CAMK2D/CALM1/CALM2/ATP1A3/ATP1B1/GJA1/ATP1B2/ATP1A2/FKBP1B	10										R-HSA-110314	Recognition of DNA damage by PCNA-containing replication complex	8/1351	30/10704	0.0287935	0.081974	0.0524847	UBA52/UBB/POLE4/UBC/RPS27A/RBX1/UBE2B/POLD2	8
CAPZB	3.83216e-161	0.210387	0.802	0.691	8.43612e-157	3.83216e-159	GO:0001736	establishment of planar polarity	28/2012	124/18866	9.1912e-05	0.00114669	0.000851153	AP2M1/PFN1/RAC1/PAFAH1B1/CLTC/ARRB2/CDC42/ANKRD6/AP2S1/AP2B1/WDR1/PSMB4/DVL1/RHOA/CELSR2/PSMA4/PSME1/EXOC5/AP2A2/PRICKLE2/PSMD10/DAAM1/PSMD4/PSMD3/PSMB7/PSMB10/PSMF1/PSMD13	28										R-HSA-1643713	Signaling by EGFR in Cancer	7/1351	25/10704	0.0309497	0.0877448	0.0561795	HSP90AA1/UBA52/UBB/HRAS/UBC/GRB2/RPS27A	7
RPL32	9.04174e-161	0.155018	1	1	1.99045e-156	9.04174e-159	GO:0007164	establishment of tissue polarity	28/2012	124/18866	9.1912e-05	0.00114669	0.000851153	AP2M1/PFN1/RAC1/PAFAH1B1/CLTC/ARRB2/CDC42/ANKRD6/AP2S1/AP2B1/WDR1/PSMB4/DVL1/RHOA/CELSR2/PSMA4/PSME1/EXOC5/AP2A2/PRICKLE2/PSMD10/DAAM1/PSMD4/PSMD3/PSMB7/PSMB10/PSMF1/PSMD13	28										R-HSA-210991	Basigin interactions	7/1351	25/10704	0.0309497	0.0877448	0.0561795	MAG/PPIA/ATP1B1/ATP1B2/BSG/SLC7A5/L1CAM	7
JAM3	1.00061e-160	0.227063	0.374	0.201	2.20275e-156	1.00061e-158	GO:0030517	negative regulation of axon extension	14/2012	43/18866	9.24116e-05	0.00115053	0.000853997	RTN4/MAG/MAP2/SEMA3D/RTN4R/SEMA4D/CDK5R1/TNR/SEMA4F/SEMA4A/SEMA3E/SEMA6B/IFRD1/CDK5	14										R-HSA-1483206	Glycerophospholipid biosynthesis	24/1351	129/10704	0.0318736	0.0888315	0.0568753	CPNE6/SLC44A1/PLD3/PLAAT4/MBOAT7/AGPAT1/PLAAT3/CPNE7/PTDSS1/AGPAT4/PITPNB/HADHB/GNPAT/CDS2/PLA2G4C/SELENOI/GPD2/CPNE3/MBOAT2/CSNK2A1/OSBPL8/MIGA1/LPGAT1/CDIPT	24
ARFGEF3	1.15566e-160	0.211809	0.503	0.314	2.54407e-156	1.15566e-158	GO:0071902	positive regulation of protein serine/threonine kinase activity	60/2012	345/18866	9.42783e-05	0.00117132	0.000869436	TF/PEA15/CD74/SNCA/ATP2B4/MAPK1/HSP90AB1/CALM3/MAP2K1/UBA52/CALM1/MIF/UBB/SOD1/CALM2/LPAR1/SLC8A2/PAK1/MAPRE3/CD81/CD24/CDK5R1/RPS3/DBNL/MAPK3/CAMK1/HRAS/FGF1/ERP29/CSF1R/UBC/MAPK8IP3/PPP2CA/IL34/GNG3/RASGRP1/VEGFA/TAOK1/PAK3/ZEB2/CDK5R2/CCNY/ADORA1/PSRC1/CRKL/UBE2N/STK39/RPS27A/PSEN1/RHOA/DUSP7/LAMTOR2/CRK/SLC27A1/CCND2/MAP4K5/DAZAP2/PSMD10/MAPK14/MAP2K4	60										R-HSA-5576891	Cardiac conduction	24/1351	129/10704	0.0318736	0.0888315	0.0568753	SCN3B/HIPK2/ATP2B4/FXYD6/CALM3/CAMK2D/CALM1/CALM2/ATP1A3/SLC8A2/ATP1B1/ATP2A2/ATP1B2/ATP1A2/KCNK1/STIM1/SCN2B/CACNB1/KCNIP3/CAMK2B/ATP2B3/ATP2B1/KCNIP2/FKBP1B	24
RPS3	1.46077e-160	0.196412	0.962	0.941	3.21573e-156	1.46077e-158	GO:0006909	phagocytosis	65/2012	382/18866	9.60343e-05	0.00119067	0.000883792	C3/HSP90AA1/MAPK1/HSP90AB1/CALR/PRKCG/ACTB/SOD1/AIF1/SNX3/CORO1A/FCER1G/ICAM5/ITGB2/PAK1/TYROBP/ARPC5/RACK1/SIRPA/CYFIP2/RAB7A/RAC1/CYBA/MAPK3/PTK2/ABR/PRKCD/ARPC4/FCGR3A/CDC42SE2/TREM2/BAIAP2/CDC42/PTEN/GRB2/ARPC3/ANXA11/TYRO3/PIK3R2/CD47/PIP5K1C/ACTR3/ADORA1/ARPC1B/NCKAP1/RHOG/DYSF/TUB/BRK1/ELMO2/LRP1/KIAA1109/TUSC2/SYT7/PTPRJ/CRK/RAB5A/PRKCE/ACTR2/ELMO1/C1orf43/DNM2/RAP1A/ARPC1A/MYH9	65										R-HSA-3134975	Regulation of innate immune responses to cytosolic DNA	5/1351	15/10704	0.0321557	0.0888315	0.0568753	UBA52/UBB/UBC/RPS27A/DDX41	5
HSPA4	2.28975e-160	0.223818	0.526	0.342	5.04066e-156	2.28975e-158	GO:0048172	regulation of short-term neuronal synaptic plasticity	8/2012	16/18866	9.65309e-05	0.00119199	0.000884775	SYP/SLC8A2/SYNGR1/SHISA9/SYT4/SHISA7/RAB3GAP1/PPFIA3	8										R-HSA-372708	p130Cas linkage to MAPK signaling for integrins	5/1351	15/10704	0.0321557	0.0888315	0.0568753	PTK2/BCAR1/CRK/TLN1/RAP1A	5
TBCB	4.64777e-160	0.213504	0.869	0.792	1.02316e-155	4.64777e-158	GO:0032387	negative regulation of intracellular transport	17/2012	59/18866	9.67395e-05	0.00119199	0.000884775	CRYAB/APOD/ABCA2/GDI1/SNX3/CNIH2/TXN/BAG4/PKIA/RANGAP1/CHP1/DMTN/UFM1/ARHGAP1/NF1/CDK5/SVIP	17										R-HSA-4839743	phosphorylation site mutants of CTNNB1 are not targeted to the proteasome by the destruction complex	5/1351	15/10704	0.0321557	0.0888315	0.0568753	PPP2CB/PPP2CA/CTNNB1/PPP2R1A/PPP2R5C	5
TMEM144	4.69027e-160	0.249267	0.355	0.185	1.03252e-155	4.69027e-158	GO:0042306	regulation of protein import into nucleus	17/2012	59/18866	9.67395e-05	0.00119199	0.000884775	APOD/MAPK1/HSP90AB1/PRKCD/PKIA/CHP1/RAN/FLNA/PIK3R2/HCLS1/PSEN1/NUTF2/UFM1/NF1/TARDBP/MAPK14/IPO5	17										R-HSA-5339716	Misspliced GSK3beta mutants stabilize beta-catenin	5/1351	15/10704	0.0321557	0.0888315	0.0568753	PPP2CB/PPP2CA/CTNNB1/PPP2R1A/PPP2R5C	5
NRCAM	1.39511e-159	0.196694	0.933	0.87	3.07119e-155	1.39511e-157	GO:0070262	peptidyl-serine dephosphorylation	9/2012	20/18866	9.82804e-05	0.00120848	0.000897019	YWHAE/PPP2CB/PPP2R2C/PPP2CA/PPP1CA/PPP2R1A/PPP1R16B/DUSP26/PPP2R2B	9										R-HSA-5358747	S33 mutants of beta-catenin aren't phosphorylated	5/1351	15/10704	0.0321557	0.0888315	0.0568753	PPP2CB/PPP2CA/CTNNB1/PPP2R1A/PPP2R5C	5
PDE1A	1.68466e-159	0.211188	0.474	0.288	3.70862e-155	1.68466e-157	GO:0006278	RNA-dependent DNA biosynthetic process	20/2012	76/18866	9.96236e-05	0.00122249	0.000907411	HSP90AA1/MAPK1/HSP90AB1/PTGES3/PPIA/HNRNPC/HNRNPA1/MAPK3/CCT5/NOP10/TERF2IP/CTNNB1/TCP1/CCT2/NHP2/HNRNPU/NEK7/TNKS2/CCT7/CCT3	20										R-HSA-5358749	S37 mutants of beta-catenin aren't phosphorylated	5/1351	15/10704	0.0321557	0.0888315	0.0568753	PPP2CB/PPP2CA/CTNNB1/PPP2R1A/PPP2R5C	5
AEBP1	2.2215e-159	0.177836	0.29	0.124	4.89042e-155	2.2215e-157	GO:0032414	positive regulation of ion transmembrane transporter activity	25/2012	106/18866	0.000102376	0.00124857	0.000926773	TMSB4X/CALM3/CALM1/CALM2/ANK2/ATP1B1/ATP1B2/CACNG3/CACNA2D1/WNK1/STIM1/HSPA2/TREM2/ANK3/CHP1/CTSS/NLGN3/STK39/EHD3/CDK5/KCNIP2/ANTKMT/AKAP6/KIF5B/DNM2	25										R-HSA-5358751	S45 mutants of beta-catenin aren't phosphorylated	5/1351	15/10704	0.0321557	0.0888315	0.0568753	PPP2CB/PPP2CA/CTNNB1/PPP2R1A/PPP2R5C	5
RAB11FIP4	5.16903e-159	0.221541	0.729	0.606	1.13791e-154	5.16903e-157	GO:0071868	cellular response to monoamine stimulus	25/2012	106/18866	0.000102376	0.00124857	0.000926773	APLP1/SNCA/ATP2B4/MAPK1/NSG2/APP/GNAO1/GNG2/SIRT2/MAPK3/CALY/CHRM1/ATF4/ARRB2/GNB1/PALM/DTNBP1/RGS4/GNAL/FLNA/ADCY5/NCSTN/HRH3/HDAC2/DNM2	25										R-HSA-5358752	T41 mutants of beta-catenin aren't phosphorylated	5/1351	15/10704	0.0321557	0.0888315	0.0568753	PPP2CB/PPP2CA/CTNNB1/PPP2R1A/PPP2R5C	5
NFASC	7.13248e-159	0.223693	0.589	0.408	1.57014e-154	7.13248e-157	GO:0071870	cellular response to catecholamine stimulus	25/2012	106/18866	0.000102376	0.00124857	0.000926773	APLP1/SNCA/ATP2B4/MAPK1/NSG2/APP/GNAO1/GNG2/SIRT2/MAPK3/CALY/CHRM1/ATF4/ARRB2/GNB1/PALM/DTNBP1/RGS4/GNAL/FLNA/ADCY5/NCSTN/HRH3/HDAC2/DNM2	25										R-HSA-937039	IRAK1 recruits IKK complex	5/1351	15/10704	0.0321557	0.0888315	0.0568753	UBA52/UBB/UBC/UBE2N/RPS27A	5
BSCL2	1.39817e-158	0.179867	0.977	0.943	3.07792e-154	1.39817e-156	GO:0060078	regulation of postsynaptic membrane potential	31/2012	144/18866	0.0001031	0.00125483	0.000931422	SLC17A7/GABRA5/APP/STX1A/GRIA1/SLC8A2/GABBR1/CHRM1/GRIN2B/ARRB2/GLRA2/BAIAP2/PRKCZ/PTEN/NLGN2/GABRB3/CHRNB2/RGS4/NLGN3/ADORA1/GRIA3/GRIN1/GRM5/GLRB/MPP2/CELF4/DVL1/TMEM25/CDK5/RAB3GAP1/GABRA2	31										R-HSA-975144	IRAK1 recruits IKK complex upon TLR7/8 or 9 stimulation	5/1351	15/10704	0.0321557	0.0888315	0.0568753	UBA52/UBB/UBC/UBE2N/RPS27A	5
TP53INP2	2.94954e-158	0.24214	0.403	0.226	6.49312e-154	2.94954e-156	GO:0002028	regulation of sodium ion transport	22/2012	88/18866	0.000105109	0.0012741	0.000945724	SCN3B/ATP2B4/YWHAH/FXYD6/CAMK2D/ARF1/CNTN1/ATP1B1/ATP1B2/ATP1A2/NKAIN2/WNK1/NKAIN4/ANK3/CHP1/SCN2B/DLG1/STK39/NEDD4L/PRKCE/KIF5B/DNM2	22										R-HSA-168927	TICAM1, RIP1-mediated IKK complex recruitment	6/1351	20/10704	0.0323797	0.0888315	0.0568753	UBA52/UBB/UBC/UBE2N/RPS27A/UBE2D2	6
MFSD6	1.37905e-157	0.221667	0.569	0.387	3.03584e-153	1.37905e-155	GO:1901879	regulation of protein depolymerization	22/2012	88/18866	0.000105109	0.0012741	0.000945724	CFL1/STMN2/SPTBN1/MTPN/CAPZB/SPTAN1/CLASP2/TAOK1/MID1IP1/WDR1/MAP6D1/DMTN/CAPZA1/DSTN/BMERB1/CFL2/PDXP/ARHGEF2/RDX/CLASP1/CAPG/APC2	22										R-HSA-3560801	Defective B3GAT3 causes JDSSDHD	6/1351	20/10704	0.0323797	0.0888315	0.0568753	BCAN/NCAN/BGN/VCAN/B3GAT3/SDC3	6
SEPTIN8	9.92134e-157	0.220506	0.852	0.775	2.18408e-152	9.92134e-155	GO:0031646	positive regulation of nervous system process	18/2012	65/18866	0.00010753	0.0013008	0.000965543	TPPP/MAG/STX1A/MYRF/SOX10/ZNF488/TNR/BAIAP2/PRKCZ/PTEN/NLGN2/RGS4/NLGN3/GBA/GRIN1/TENM4/DVL1/RNF10	18										R-HSA-388844	Receptor-type tyrosine-protein phosphatases	6/1351	20/10704	0.0323797	0.0888315	0.0568753	PTPRD/SLITRK1/PPFIA2/PPFIA3/PTPRF/LRRC4B	6
TUSC3	1.06018e-156	0.212053	0.466	0.283	2.33387e-152	1.06018e-154	GO:0043547	positive regulation of GTPase activity	68/2012	406/18866	0.000109553	0.0013226	0.000981726	MAP4K4/THY1/MAPRE2/S100A10/GDI1/PKP4/CX3CL1/ARHGDIA/RTN4R/SEMA4D/AGAP1/RACK1/RAP1GAP/ARHGDIG/AGAP3/CHN1/RGS14/AGAP2/HRAS/ABR/ADAP1/EIF5/GIT1/DOCK9/ARHGDIB/PLXNB1/PREX1/RANGAP1/RASGRP1/PICALM/RAP1GAP2/ARHGAP23/DOCK5/RASAL1/ARHGAP21/RGS4/IQSEC1/PIN1/GNAQ/CRKL/RABGAP1/JUN/TBC1D9B/RHOG/RABEP1/ZC3H15/ARHGAP1/RAP1GDS1/ARAP1/DOCK4/TBC1D14/RABGAP1L/NF1/PREB/SYNGAP1/SRGAP2/EVI5L/TBC1D13/CDKL5/ADGRB3/CRK/A…	68										R-HSA-8964616	G beta:gamma signalling through CDC42	6/1351	20/10704	0.0323797	0.0888315	0.0568753	GNG2/PAK1/GNG7/GNG3/CDC42/GNB1	6
NPTN	1.06356e-156	0.202165	0.963	0.916	2.34132e-152	1.06356e-154	GO:0061615	glycolytic process through fructose-6-phosphate	11/2012	29/18866	0.000109967	0.00132493	0.000983452	TPI1/GAPDH/PGM2L1/PKM/ENO1/PGAM2/PFKP/HK1/GPI/ENO2/PGAM1	11										R-HSA-5620924	Intraflagellar transport	12/1351	54/10704	0.0341273	0.0932493	0.0597038	TUBA1A/TUBA1B/TUBB4A/TUBB2A/DYNLL1/KIF3C/TUBB3/DYNLL2/DYNLRB1/KIFAP3/TUBA4A/TUBB2B	12
C12orf76	1.10676e-156	0.209948	0.514	0.327	2.43643e-152	1.10676e-154	GO:1990090	cellular response to nerve growth factor stimulus	15/2012	49/18866	0.000115809	0.00138971	0.00103154	APP/SH3GL2/CORO1A/STMN2/HSPA5/MAPT/KIF1B/EEF2/KAT2A/DYNC1LI2/PTEN/ARPC3/SORT1/CRK/RAP1A	15										R-HSA-6781823	Formation of TC-NER Pre-Incision Complex	12/1351	54/10704	0.0341273	0.0932493	0.0597038	UBA52/UBB/POLR2L/UBC/HMGN1/COPS7A/POLR2F/RPS27A/RBX1/POLR2J/USP7/COPS8	12
KCTD12	1.36205e-156	0.214493	0.555	0.364	2.99842e-152	1.36205e-154	GO:2000059	negative regulation of ubiquitin-dependent protein catabolic process	15/2012	49/18866	0.000115809	0.00138971	0.00103154	HIPK2/HSP90AB1/RPL5/RPL11/RPL23/DDRGK1/USP14/PSEN1/RYBP/USP7/SGTA/CSNK2A1/SVIP/UBXN1/WAC	15										R-HSA-9668328	Sealing of the nuclear envelope (NE) by ESCRT-III	8/1351	31/10704	0.0346553	0.0945018	0.0605058	TUBA1A/TUBA1B/TUBB4A/TUBB2A/TUBB3/TUBA4A/IST1/TUBB2B	8
PRRC2B	2.37682e-156	0.205318	0.842	0.742	5.23233e-152	2.37682e-154	GO:0007009	plasma membrane organization	26/2012	113/18866	0.000116292	0.00138992	0.00103169	SH3GL2/SOD1/PSAP/ANK2/BIN1/MYRF/SPTBN1/ATP2A2/TMEFF2/CLU/FA2H/PACSIN1/PRKCD/NDRG1/BAIAP2/ANK3/PTEN/ANO3/STX4/DYSF/S100A9/SYT7/FLOT1/MTSS2/DNM2/MYH9	26										R-HSA-397014	Muscle contraction	34/1351	197/10704	0.0347524	0.0945766	0.0605537	SCN3B/HIPK2/ATP2B4/FXYD6/CALM3/CAMK2D/CALM1/CALM2/ATP1A3/SLC8A2/ATP1B1/ATP2A2/ATP1B2/PAK1/ATP1A2/MYL6/KCNK1/STIM1/GUCY1B1/TPM3/SCN2B/CACNB1/KCNIP3/DYSF/CAMK2B/ATP2B3/ATP2B1/KCNIP2/TLN1/MYL12B/MYL9/FKBP1B/TPM1/VIM	34
MTRNR2L6	2.74854e-156	0.249642	0.474	0.3	6.05063e-152	2.74854e-154	GO:0048024	regulation of mRNA splicing, via spliceosome	26/2012	113/18866	0.000116292	0.00138992	0.00103169	QKI/HNRNPK/HNRNPA2B1/HNRNPA1/CELF5/MBNL2/HSPA8/FXR1/RBM4/NOVA2/RBM10/DDX5/NCL/SRSF6/CELF3/TRA2A/DYRK1A/RBM23/MBNL1/PCBP4/CELF2/CELF4/SRSF1/HNRNPU/RNPS1/SF1	26										R-HSA-5696398	Nucleotide Excision Repair	21/1351	111/10704	0.0363388	0.0986962	0.0631912	UBA52/ACTB/UBB/POLR2L/POLE4/RAD23B/UBC/HMGN1/COPS7A/POLR2F/UBE2N/YY1/RPS27A/RBX1/PARP1/SUMO3/POLR2J/USP7/POLD2/UBE2I/COPS8	21
AMER2	3.06225e-156	0.257745	0.651	0.503	6.74123e-152	3.06225e-154	GO:0038127	ERBB signaling pathway	31/2012	145/18866	0.000117958	0.00140702	0.00104438	HSP90AA1/MAPK1/APP/SH3GL2/RTN4/ERBIN/RAB7A/PTPRR/PTK2/RASSF2/ERBB3/CDH13/BCAR1/CDC42/GRB2/IFI6/FBXW7/ADORA1/NEURL1/RBPJ/HGS/PSEN1/LGMN/ARAP1/MVB12B/EPN1/CPNE3/PTPRJ/EPS15/SNX6/SH3KBP1	31										R-HSA-170834	Signaling by TGF-beta Receptor Complex	15/1351	73/10704	0.0370363	0.0999905	0.06402	UBA52/UBB/XPO1/FKBP1A/UBC/PRKCZ/PPP1CA/PPP1CC/USP9X/PPP1CB/NEDD4L/RPS27A/NCOR2/RHOA/PARP1	15
APOC2	3.1558e-156	0.21866	0.365	0.192	6.94717e-152	3.1558e-154	GO:0061418	regulation of transcription from RNA polymerase II promoter in response to hypoxia	20/2012	77/18866	0.000121251	0.00143964	0.0010686	UBA52/UBB/SIRT2/UBC/VEGFA/ELOB/PSMB4/RBPJ/RPS27A/RBX1/EGLN2/PSMA4/PSME1/PSMD10/PSMD4/PSMD3/PSMB7/PSMB10/PSMF1/PSMD13	20										R-HSA-174184	Cdc20:Phospho-APC/C mediated degradation of Cyclin A	15/1351	73/10704	0.0370363	0.0999905	0.06402	UBA52/UBB/UBC/PSMB4/RPS27A/PSMA4/PSME1/PSMD10/PSMD4/PSMD3/PSMB7/ANAPC16/PSMB10/PSMF1/PSMD13	15
CLIC4	6.7712e-156	0.216154	0.37	0.197	1.49061e-151	6.7712e-154	GO:0031112	positive regulation of microtubule polymerization or depolymerization	12/2012	34/18866	0.000121416	0.00143964	0.0010686	HSPA1A/STMN2/PAK1/DCTN1/MAPT/CDK5R1/RPS3/RAC1/ARL2/HSPA1B/PSRC1/CLASP1	12										R-HSA-69017	CDK-mediated phosphorylation and removal of Cdc6	15/1351	73/10704	0.0370363	0.0999905	0.06402	UBA52/UBB/UBC/PSMB4/RPS27A/PSMA4/PSME1/PSMD10/PSMD4/PSMD3/PSMB7/ANAPC16/PSMB10/PSMF1/PSMD13	15
RTP5	9.94113e-156	0.16705	0.242	0.094	2.18844e-151	9.94113e-154	GO:0099084	postsynaptic specialization organization	12/2012	34/18866	0.000121416	0.00143964	0.0010686	GAP43/LRRTM1/NRXN2/PTEN/NLGN2/DLG2/DLG1/SYNGAP1/LRRTM2/PTPRD/CDH2/LRRC4B	12										R-HSA-1660661	Sphingolipid de novo biosynthesis	10/1351	43/10704	0.0382348	0.102818	0.06583	FA2H/PLPP2/VAPA/CERS6/SPTLC2/CERS4/CERS2/PPM1L/VAPB/SAMD8	10
RNF11	2.17715e-155	0.194417	0.935	0.878	4.79278e-151	2.17715e-153	GO:0060999	positive regulation of dendritic spine development	14/2012	44/18866	0.000122339	0.00144486	0.00107247	APOE/LPAR1/ARF1/DBNL/PAFAH1B1/CAMK1/OPA1/BAIAP2/PAK3/NEURL1/PSEN1/CAMK2B/CDKL5/ACTR2	14										R-HSA-5696395	Formation of Incision Complex in GG-NER	10/1351	43/10704	0.0382348	0.102818	0.06583	UBA52/UBB/RAD23B/UBC/UBE2N/RPS27A/RBX1/PARP1/SUMO3/UBE2I	10
RAB7A	8.70516e-155	0.209788	0.817	0.707	1.91635e-150	8.70516e-153	GO:0097178	ruffle assembly	14/2012	44/18866	0.000122339	0.00144486	0.00107247	AIF1/COBL/PFN1/RAC1/DBNL/HRAS/BAG4/EVL/AIF1L/FAM98A/RHOG/RDX/SNX10/MTSS2	14										R-HSA-6811440	Retrograde transport at the Trans-Golgi-Network	11/1351	49/10704	0.038792	0.10411	0.0666574	NSF/NAPB/SCOC/RAB6B/NAPA/RAB6A/TGOLN2/COG1/M6PR/STX16/NAPG	11
ARL8A	2.87957e-154	0.219887	0.659	0.506	6.33908e-150	2.87957e-152	GO:0018210	peptidyl-threonine modification	28/2012	126/18866	0.000123293	0.00144934	0.0010758	CHI3L1/HIPK2/MAPK1/CALM3/CAMK2D/MAP2K1/APP/CALM1/CALM2/DDIT4/GALNT16/SIRT2/SPRED1/CDK5R1/WNK1/PRKCD/EIF4G1/DMTN/DYRK1A/STK39/CADM4/UBE2K/PRKAG2/CDC42BPA/CDK5/CLK1/ACVR1B/CSNK2A1	28										R-HSA-2022923	Dermatan sulfate biosynthesis	4/1351	11/10704	0.0401265	0.106429	0.0681425	BCAN/NCAN/BGN/VCAN	4
PIP4K2B	1.62515e-153	0.191227	0.91	0.83	3.57761e-149	1.62515e-151	GO:0030838	positive regulation of actin filament polymerization	24/2012	101/18866	0.00012332	0.00144934	0.0010758	BIN1/ARF1/CORO1A/ARPC5/PFN1/BAG4/ARPC4/EVL/BAIAP2/GRB2/ARPC3/GMFB/ACTR3B/DLG1/ABI2/ACTR3/ARPC1B/NCKAP1/CDC42EP1/BRK1/RHOA/PRKCE/ACTR2/ARPC1A	24										R-HSA-9013700	NOTCH4 Activation and Transmission of Signal to the Nucleus	4/1351	11/10704	0.0401265	0.106429	0.0681425	YWHAZ/PSEN1/NCSTN/ADAM10	4
EDF1	3.26316e-153	0.182805	0.944	0.901	7.18352e-149	3.26316e-151	GO:0021953	central nervous system neuron differentiation	38/2012	192/18866	0.000123447	0.00144934	0.0010758	HSP90AA1/NPY/CNTN2/HSP90AB1/NKX6-2/FAIM2/UBB/PSAP/B2M/ID4/MAP2/SPOCK1/MTPN/MAPT/OLIG2/PAFAH1B1/PTK2/CSF1R/PTEN/ZEB2/FEZF2/ZMIZ1/CHRNB2/CTNNB1/SCYL1/CRKL/DCLK1/PSEN1/NFIB/FGFR2/NFE2L1/DCLK2/CRK/ARHGAP35/CDK5/SLC25A46/CSNK1E/HPRT1	38										R-HSA-9014325	TICAM1,TRAF6-dependent induction of TAK1 complex	4/1351	11/10704	0.0401265	0.106429	0.0681425	UBA52/UBB/UBC/RPS27A	4
MARCKS	3.73004e-153	0.195766	0.897	0.82	8.21131e-149	3.73004e-151	GO:0046824	positive regulation of nucleocytoplasmic transport	18/2012	66/18866	0.000133278	0.0015617	0.0011592	MAPK1/HSP90AB1/YWHAE/CAMK1/PRKCD/DHX9/RAN/ANP32B/FLNA/PIK3R2/HCLS1/PSEN1/NUTF2/TARDBP/RBM26/MDM2/MAPK14/IPO5	18										R-HSA-9614399	Regulation of localization of FOXO transcription factors	4/1351	11/10704	0.0401265	0.106429	0.0681425	YWHAZ/YWHAB/YWHAG/YWHAQ	4
RPS9	4.80543e-153	0.196255	0.969	0.954	1.05787e-148	4.80543e-151	GO:0031503	protein-containing complex localization	52/2012	291/18866	0.000133676	0.00156331	0.00116039	CLSTN1/DYNLL1/HPCA/CNIH2/XPO1/DNM1/HNRNPA2B1/TYROBP/RPS15/CACNG3/KIF3C/NPTN/HRAS/CALY/DYNLL2/KIF5C/EIF5A/RAN/PRKCZ/STX7/AP2B1/SSNA1/DLG2/SLBP/DLG1/DYNLRB1/SRSF6/FKBP4/CASC3/SFPQ/IQSEC2/NXF1/KIFAP3/LRRC7/TUB/SRSF1/HNRNPU/ANKS1B/EPS15/SEH1L/THOC7/USP46/ADAM10/RNPS1/AGFG1/KIF5B/SMG1/EIF4E/DNM2/RAP1A/ALKBH5/PABPN1	52										R-HSA-9634285	Constitutive Signaling by Overexpressed ERBB2	4/1351	11/10704	0.0401265	0.106429	0.0681425	HSP90AA1/ERBIN/HRAS/GRB2	4
AGAP3	5.24335e-153	0.183643	0.952	0.902	1.15427e-148	5.24335e-151	GO:0043405	regulation of MAP kinase activity	59/2012	342/18866	0.000134743	0.00156976	0.00116518	TF/PEA15/CD74/MAPK1/MAP2K1/DNAJA1/UCHL1/APOE/UBA52/MIF/UBB/SOD1/LPAR1/PAK1/CD81/SPRED1/MAPK8IP1/CD24/RPS3/DBNL/MAPK3/RGS14/HRAS/FGF1/ERP29/UBC/MAPK8IP3/PPP2CA/HMGCR/PRKCD/IL34/GNG3/RASGRP1/VEGFA/TAOK1/PAK3/ZEB2/DTNBP1/RGS4/PPP2R1A/GBA/ADORA1/CRKL/UBE2N/HGS/STK39/RPS27A/PSEN1/SMPD1/NF1/GSTP1/DUSP7/LAMTOR2/PTPRJ/CRK/MAP4K5/MAPK14/CDK5RAP3/MAP2K4	59										R-HSA-9645460	Alpha-protein kinase 1 signaling pathway	4/1351	11/10704	0.0401265	0.106429	0.0681425	UBA52/UBB/UBC/RPS27A	4
SEC11C	5.92352e-153	0.221764	0.75	0.636	1.304e-148	5.92352e-151	GO:0072503	cellular divalent inorganic cation homeostasis	79/2012	492/18866	0.000134754	0.00156976	0.00116518	HSP90B1/SNCA/ATP2B4/THY1/CALR/CALM3/CAMK2D/APP/TPT1/APOE/CALM1/YWHAE/CALM2/ANK2/PRNP/GRIA1/APLNR/LPAR1/SLC8A2/SLC30A3/CORO1A/ATP1B1/GJA1/ATP2A2/CX3CL1/FKBP1A/ATP1A2/BOK/EDNRB/ATP2C1/SYNPO/CD24/PTGER3/NPTN/CYBA/CACNA2D1/NCS1/CAPN3/SV2A/BCAP31/GRIN2B/ATF4/KCTD17/TMEM165/STIM1/GNG3/SLC39A10/GNB1/S100A8/MYO5A/BNIP3/SPPL3/JPH4/ADORA1/GRIN1/CALB1/ADCY5/GRM5/SLC25A23/PSEN1/RAP1GDS1/GTF2I/SLC30A9/TMBIM6/…	79										R-HSA-5689880	Ub-specific processing proteases	37/1351	220/10704	0.0404832	0.107166	0.0686141	UBA52/UBB/SNX3/USP22/UBC/VDAC1/ARRB2/KAT2A/PTEN/CCP110/USP14/PSMB4/USP5/USP9X/TOMM70/TAF10/HGS/RPS27A/OTUB1/PSMA4/PSME1/TOMM20/USP7/TNKS2/PSMD10/MDM2/RHOT1/PSMD4/KEAP1/USP33/CYLD/PSMD3/PSMB7/RNF146/PSMB10/PSMF1/PSMD13	37
NPTX2	7.30834e-153	0.22785	0.428	0.251	1.60886e-148	7.30834e-151	GO:0060071	Wnt signaling pathway, planar cell polarity pathway	25/2012	108/18866	0.000140852	0.00163761	0.00121554	AP2M1/PFN1/RAC1/CLTC/ARRB2/CDC42/ANKRD6/AP2S1/AP2B1/PSMB4/DVL1/RHOA/CELSR2/PSMA4/PSME1/AP2A2/PRICKLE2/PSMD10/DAAM1/PSMD4/PSMD3/PSMB7/PSMB10/PSMF1/PSMD13	25										R-HSA-901032	ER Quality Control Compartment (ERQC)	6/1351	21/10704	0.0406399	0.107372	0.0687457	UBA52/UBB/UBC/SEL1L/RPS27A/RNF5	6
G3BP2	7.63087e-153	0.194678	0.892	0.827	1.67986e-148	7.63087e-151	GO:1903076	regulation of protein localization to plasma membrane	24/2012	102/18866	0.00014519	0.00168316	0.00124935	ATP2B4/ACTB/PRNP/AP2M1/SPTBN1/RACK1/CLTC/CLIP3/TREM2/PICALM/STX7/TMEM59/TMBIM1/DLG1/SQSTM1/STX4/RHOG/PID1/AKAP5/LRP1/CDK5/PRKCE/BCL2L1/KIF5B	24										R-HSA-174178	APC/C:Cdh1 mediated degradation of Cdc20 and other APC/C:Cdh1 targeted proteins in late mitosis/early G1	15/1351	74/10704	0.0412412	0.108205	0.0692793	UBA52/UBB/UBC/PSMB4/RPS27A/PSMA4/PSME1/PSMD10/PSMD4/PSMD3/PSMB7/ANAPC16/PSMB10/PSMF1/PSMD13	15
MBNL2	1.44317e-152	0.216921	0.788	0.673	3.17699e-148	1.44317e-150	GO:0071453	cellular response to oxygen levels	44/2012	235/18866	0.000145333	0.00168316	0.00124935	HIPK2/UBA52/UBB/LPAR1/AQP1/ATP6AP1/SIRT2/ENO1/DDAH1/ATP6V1A/UBC/B3GAT1/OPA1/ATP6V0D1/ATF4/NDRG1/PDK3/GNB1/VEGFA/ELOB/PTEN/HYOU1/CPEB2/PSMB4/BNIP3/RBPJ/RPS27A/RBX1/TMBIM6/EGLN2/PSMA4/PSME1/P4HB/PRKCE/AK4/PSMD10/MDM2/PSMD4/PSMD3/PSMB7/PSMB10/PSMF1/BNIP3L/PSMD13	44										R-HSA-179419	APC:Cdc20 mediated degradation of cell cycle proteins prior to satisfation of the cell cycle checkpoint	15/1351	74/10704	0.0412412	0.108205	0.0692793	UBA52/UBB/UBC/PSMB4/RPS27A/PSMA4/PSME1/PSMD10/PSMD4/PSMD3/PSMB7/ANAPC16/PSMB10/PSMF1/PSMD13	15
SRCIN1	3.40844e-152	0.217039	0.467	0.287	7.50333e-148	3.40844e-150	GO:0005513	detection of calcium ion	7/2012	13/18866	0.000148851	0.00172057	0.00127712	CALM3/SYT1/CALM1/CALM2/KCNMB4/STIM1/KCNIP2	7										R-HSA-451326	Activation of kainate receptors upon glutamate binding	8/1351	32/10704	0.041274	0.108205	0.0692793	CALM3/CALM1/CALM2/GNG2/GNG7/GNG3/GNB1/DLG1	8
UQCC2	4.20565e-152	0.215363	0.492	0.31	9.25832e-148	4.20565e-150	GO:0099054	presynapse assembly	15/2012	50/18866	0.00014928	0.00172219	0.00127833	SNCA/APP/PCDH17/BSN/LRRTM1/EIF4G1/PTEN/NLGN2/NLGN3/CLSTN3/PCLO/DVL1/PTPRD/SLITRK1/LRRC4B	15										R-HSA-5656169	Termination of translesion DNA synthesis	8/1351	32/10704	0.041274	0.108205	0.0692793	UBA52/UBB/POLE4/UBC/RPS27A/ISG15/POLD2/UBE2L6	8
TSPYL4	6.9512e-152	0.205045	0.823	0.709	1.53024e-147	6.9512e-150	GO:0046847	filopodium assembly	17/2012	61/18866	0.000152149	0.00175192	0.00130039	GPM6A/DPYSL3/FSCN1/GAP43/CAPZB/PRKCD/FXR1/CDC42/RIPOR2/PALM/DMTN/MIEN1/NEURL1/ARAP1/PPP1R16B/SRGAP2/RAB5A	17										R-HSA-193639	p75NTR signals via NF-kB	5/1351	16/10704	0.0420465	0.109595	0.0701695	UBA52/UBB/UBC/SQSTM1/RPS27A	5
EIF4H	1.36619e-151	0.188788	0.924	0.869	3.00753e-147	1.36619e-149	GO:0008654	phospholipid biosynthetic process	49/2012	271/18866	0.000153554	0.0017614	0.00130743	PIP4K2A/CPNE6/FABP3/SLC44A1/SERINC1/ABCA2/ARF1/MBOAT7/ARF3/PIP4K2B/DGKZ/AGPAT1/PLAAT3/AGAP2/PGAP1/PI4KA/CPNE7/SYNJ2/PTEN/PTDSS1/AGPAT4/PIK3R2/PIP5K1C/GNPAT/SYNJ1/CDS2/PLEKHA2/PLA2G4C/FAR1/SPTLC2/SELENOI/DGKG/VAC14/INPP4A/PIGT/CPNE3/MBOAT2/NUS1/SLC27A1/RAB5A/CSNK2A1/RAB4A/MTMR6/HMGCS1/SACM1L/SAMD8/LPGAT1/SBF1/CDIPT	49										R-HSA-3322077	Glycogen synthesis	5/1351	16/10704	0.0420465	0.109595	0.0701695	UBA52/UBB/PGM2L1/UBC/RPS27A	5
PRPS1	2.87073e-151	0.218975	0.449	0.272	6.31963e-147	2.87073e-149	GO:1904064	positive regulation of cation transmembrane transport	31/2012	147/18866	0.000153562	0.0017614	0.00130743	SNCA/THY1/TMSB4X/CALM3/CALM1/CALM2/ANK2/APLNR/ARF1/ATP1B1/ATP1B2/CX3CL1/CACNG3/CACNA2D1/CAPN3/WNK1/STIM1/HSPA2/TREM2/ANK3/CHP1/CTSS/NLGN3/FLNA/EHD3/CDK5/KCNIP2/ANTKMT/AKAP6/KIF5B/DNM2	31										R-HSA-391160	Signal regulatory protein family interactions	5/1351	16/10704	0.0420465	0.109595	0.0701695	TYROBP/SIRPA/PTK2/GRB2/CD47	5
SLAIN1	1.11342e-150	0.231226	0.421	0.251	2.45108e-146	1.11342e-148	GO:0046390	ribose phosphate biosynthetic process	38/2012	194/18866	0.000154505	0.00176881	0.00131293	TMSB4X/SCD5/AK5/PKM/ATP5ME/ENO1/SCD/GUK1/PRPS1/ELOVL1/RFK/TKT/ACOT7/TREM2/PDK3/ACSL4/GUCY1B1/ELOVL5/FASN/PPT1/ADCY1/PDHA1/NME4/ADCY5/ATP5MC2/CMPK1/PID1/ATP5MF/PRKAG2/PARP1/SLC25A1/PAPSS1/ACLY/TECR/PDHB/AK4/ANTKMT/HPRT1	38										R-HSA-68867	Assembly of the pre-replicative complex	14/1351	68/10704	0.0423468	0.109956	0.0704004	UBA52/UBB/UBC/PSMB4/RPS27A/PSMA4/PSME1/PSMD10/PSMD4/PSMD3/PSMB7/PSMB10/PSMF1/PSMD13	14
PLPPR2	1.1832e-150	0.204163	0.679	0.513	2.60469e-146	1.1832e-148	GO:0006874	cellular calcium ion homeostasis	74/2012	456/18866	0.00015528	0.0017695	0.00131344	HSP90B1/SNCA/ATP2B4/THY1/CALR/CALM3/CAMK2D/APP/TPT1/APOE/CALM1/YWHAE/CALM2/ANK2/PRNP/GRIA1/APLNR/LPAR1/SLC8A2/CORO1A/ATP1B1/GJA1/ATP2A2/CX3CL1/FKBP1A/ATP1A2/BOK/EDNRB/ATP2C1/SYNPO/CD24/PTGER3/NPTN/CYBA/CACNA2D1/NCS1/CAPN3/SV2A/BCAP31/GRIN2B/ATF4/KCTD17/TMEM165/STIM1/GNG3/GNB1/MYO5A/BNIP3/SPPL3/JPH4/ADORA1/GRIN1/CALB1/ADCY5/GRM5/SLC25A23/PSEN1/RAP1GDS1/GTF2I/TMBIM6/CCKBR/TSPOAP1/ATP2B3/LRP1/MICU3/…	74										R-HSA-9694516	SARS-CoV-2 Infection	14/1351	68/10704	0.0423468	0.109956	0.0704004	CANX/UBA52/UBB/TUSC3/UBC/MAN2A1/DDX5/PRKCSH/RPN2/RPS27A/ST6GAL1/RPN1/GANAB/UBE2I	14
RPS11	2.16005e-150	0.164249	0.994	0.99	4.75513e-146	2.16005e-148	GO:0006662	glycerol ether metabolic process	9/2012	21/18866	0.000155749	0.0017695	0.00131344	TXN/PAFAH1B1/PLAAT3/GNPAT/FASN/NCEH1/PLA2G4C/FAR1/TXN2	9										R-HSA-168643	Nucleotide-binding domain, leucine rich repeat containing receptor (NLR) signaling pathways	12/1351	56/10704	0.0439572	0.11392	0.0729383	HSP90AB1/APP/UBA52/UBB/TXN/UBC/SUGT1/UBE2N/RPS27A/BCL2L1/MAPK14/CYLD	12
DGKZ	2.3417e-150	0.188065	0.899	0.825	5.15501e-146	2.3417e-148	GO:0010801	negative regulation of peptidyl-threonine phosphorylation	9/2012	21/18866	0.000155749	0.0017695	0.00131344	CALM3/CALM1/CALM2/DDIT4/SIRT2/SPRED1/EIF4G1/DMTN/CADM4	9										R-HSA-1483249	Inositol phosphate metabolism	11/1351	50/10704	0.0442792	0.114535	0.0733325	CALM3/CALM1/CALM2/NUDT4/PTEN/ITPKB/SYNJ1/IP6K2/PLCD3/ITPK1/INPP4A	11
GHITM	4.35327e-150	0.18607	0.962	0.928	9.58329e-146	4.35327e-148	GO:0032288	myelin assembly	9/2012	21/18866	0.000155749	0.0017695	0.00131344	TPPP/ANK2/ABCA2/CD9/UGT8/NFASC/GNPAT/TENM4/CNTNAP1	9										R-HSA-381119	Unfolded Protein Response (UPR)	18/1351	94/10704	0.045061	0.116336	0.0744854	HSP90B1/CALR/PDIA6/DCTN1/HSPA5/ATP6V0D1/ATF4/HYOU1/MYDGF/TPP1/PREB/EXTL3/SRPRA/SSR1/TLN1/HERPUD1/HDGF/CTDSP2	18
USP22	8.58547e-150	0.183345	0.948	0.894	1.89001e-145	8.58547e-148	GO:0031116	positive regulation of microtubule polymerization	11/2012	30/18866	0.000156986	0.00178017	0.00132136	HSPA1A/PAK1/DCTN1/MAPT/CDK5R1/RPS3/RAC1/ARL2/HSPA1B/PSRC1/CLASP1	11										R-HSA-174143	APC/C-mediated degradation of cell cycle proteins	17/1351	88/10704	0.0469326	0.120709	0.0772853	UBA52/UBB/UBC/SKP1/BTRC/PSMB4/RPS27A/PSMA4/PSME1/PSMD10/PSMD4/PSMD3/PSMB7/ANAPC16/PSMB10/PSMF1/PSMD13	17
RPL18A	1.33266e-149	0.168036	0.991	0.989	2.93372e-145	1.33266e-147	GO:0031589	cell-substrate adhesion	61/2012	359/18866	0.000161446	0.00182728	0.00135633	APOD/MAP4K4/THY1/CALR/EDIL3/S100A10/GPM6B/CORO1A/SPOCK1/ATP1B2/CX3CL1/CD63/ITGB2/TMEFF2/JAM3/SRCIN1/CD44/RAC1/ARL2/PTK2/ITGB4/CDH13/FAM107A/PREX1/SEMA3E/CLASP2/CDC42/EPDR1/VEGFA/PRKCZ/PTEN/DOCK5/SPOCK2/TYRO3/DMTN/LIMCH1/CTNNB1/FLNA/CRKL/PLEKHA2/PARVB/RHOA/AJAP1/NF1/CLASP1/SRGAP2/DUSP22/LRP1/P4HB/PTPRJ/CRK/CDK5/PRKCE/PPFIA2/RAB1A/PTPRK/L1CAM/DNM2/ATRN/MINK1/DDR1	61										R-HSA-453276	Regulation of mitotic cell cycle	17/1351	88/10704	0.0469326	0.120709	0.0772853	UBA52/UBB/UBC/SKP1/BTRC/PSMB4/RPS27A/PSMA4/PSME1/PSMD10/PSMD4/PSMD3/PSMB7/ANAPC16/PSMB10/PSMF1/PSMD13	17
LIPA	4.27254e-149	0.208497	0.331	0.168	9.40557e-145	4.27254e-147	GO:0051403	stress-activated MAPK cascade	51/2012	286/18866	0.000162706	0.00183806	0.00136433	CRYAB/TF/MAP4K4/HIPK2/MAPK1/MTURN/MAP2K1/DNAJA1/APP/UBA52/UBB/PAK1/MAPK8IP1/SIRPA/RPS3/DBNL/PAFAH1B1/MAPK3/HRAS/UBC/RASSF2/ARL6IP5/MAPK8IP3/PJA2/EMC10/HMGCR/SKP1/RASGRP1/CDC42/BTRC/ANKRD6/VEGFA/TAOK1/PRDX1/ZEB2/DTNBP1/DLG1/CRKL/UBE2N/RPS27A/KLHDC10/GSTP1/DUSP22/MAP4K5/RAP2A/MAPK14/MAP2K4/FBXW11/CYLD/PHLPP1/MINK1	51										R-HSA-388841	Costimulation by the CD28 family	14/1351	69/10704	0.0472024	0.121174	0.0775826	HLA-DRA/PAK1/PPP2CB/RAC1/PPP2CA/CDC42/HLA-DPB1/HLA-DRB1/PAK3/GRB2/HLA-DPA1/PPP2R1A/PIK3R2/PPP2R5C	14
MAL2	5.02398e-149	0.205099	0.52	0.335	1.10598e-144	5.02398e-147	GO:0021761	limbic system development	25/2012	109/18866	0.000164534	0.00185519	0.00137705	ATP2B4/YWHAE/UBB/ID4/ATP1A2/ARPC5/NEFL/FEZ1/CDK5R1/PAFAH1B1/NEUROD6/BCAN/PTEN/ZEB2/CDK5R2/FEZF2/CRKL/NF1/FGFR2/DCLK2/CRK/POU3F2/CDK5/RAB3GAP1/KIF5B	25										R-HSA-73887	Death Receptor Signalling	25/1351	141/10704	0.048262	0.123511	0.0790791	UBA52/YWHAE/UBB/RTN4/MAG/LINGO1/ARHGDIA/RTN4R/RACK1/RAC1/ABR/UBC/CLIP3/BAG4/PREX1/SQSTM1/ARHGEF9/RPS27A/PSEN1/ARHGEF2/NCSTN/RHOA/HDAC2/CYLD/OMG	25
CD44	8.90313e-149	0.190328	0.231	0.089	1.95993e-144	8.90313e-147	GO:0099558	maintenance of synapse structure	8/2012	17/18866	0.000165297	0.00186029	0.00138083	DCTN1/BSN/ERC2/DLG2/DLG1/PCLO/SYNGAP1/ADGRB3	8										R-HSA-8878166	Transcriptional regulation by RUNX2	22/1351	121/10704	0.0482947	0.123511	0.0790791	MAPK1/UBA52/UBB/MAPK3/UBC/SKP1/PSMB4/FBXW7/RPS27A/RBX1/PSMA4/PSME1/RBM14/STAT1/PSMD10/HDAC4/PSMD4/PSMD3/PSMB7/PSMB10/PSMF1/PSMD13	22
TMED9	1.01122e-148	0.202832	0.472	0.291	2.2261e-144	1.01122e-146	GO:1905330	regulation of morphogenesis of an epithelium	36/2012	181/18866	0.000165738	0.00186175	0.00138191	AP2M1/GJA1/PFN1/RAC1/CLTC/FGF1/SOX8/ARRB2/CLASP2/CDC42/ANKRD6/VEGFA/AP2S1/PTEN/AP2B1/PSMB4/CTNNB1/ETV5/DVL1/RHOA/AJAP1/CLASP1/CELSR2/PSMA4/PSME1/STAT1/AP2A2/PRICKLE2/PSMD10/DAAM1/PSMD4/PSMD3/PSMB7/PSMB10/PSMF1/PSMD13	36										R-HSA-418990	Adherens junctions interactions	8/1351	33/10704	0.0486799	0.124262	0.0795599	ACTB/CDH13/CDH8/NECTIN1/CTNNB1/CADM1/CADM2/CDH2	8
RAC1	1.09237e-148	0.182074	0.953	0.914	2.40475e-144	1.09237e-146	GO:0002183	cytoplasmic translational initiation	12/2012	35/18866	0.00016695	0.00186601	0.00138508	RPL13A/EIF4A2/EIF4H/EIF5/EIF4G1/RBM4/EIF3M/EIF3B/EIF4B/DENR/EIF3E/YTHDF2	12
PTPRR	1.34326e-148	0.168907	0.261	0.111	2.95706e-144	1.34326e-146	GO:0032228	regulation of synaptic transmission, GABAergic	12/2012	35/18866	0.00016695	0.00186601	0.00138508	BAIAP3/STXBP1/PHF24/CA2/PTEN/NLGN2/ADORA1/NISCH/NF1/PRKCE/USP46/KIF5B	12
ITM2C	1.45353e-148	0.160087	0.998	0.996	3.1998e-144	1.45353e-146	GO:0034314	Arp2/3 complex-mediated actin nucleation	13/2012	40/18866	0.000167054	0.00186601	0.00138508	ARF1/ARPC5/ARPC4/ARPC3/GMFB/ACTR3B/ABI2/ACTR3/ARPC1B/NCKAP1/BRK1/ACTR2/ARPC1A	13
RPL27	1.12663e-147	0.165917	0.986	0.975	2.48015e-143	1.12663e-145	GO:0031529	ruffle organization	16/2012	56/18866	0.000171674	0.00191404	0.00142073	AIF1/COBL/PFN1/RAC1/DBNL/HRAS/CSF1R/BAG4/EVL/AIF1L/FAM98A/RHOG/RDX/SNX10/TPM1/MTSS2	16
RAB3B	1.43332e-147	0.170652	0.246	0.1	3.15531e-143	1.43332e-145	GO:0090114	COPII-coated vesicle budding	19/2012	73/18866	0.000172525	0.00191637	0.00142246	NSF/GRIA1/CNIH2/NAPA/SERPINA1/PPP6R1/VAPA/TMED2/PEF1/TRAPPC1/TRAPPC2L/CNIH1/PREB/SCAP/KLHL12/VAPB/CUL3/SAR1B/RAB1A	19
RASL10A	2.19376e-147	0.193106	0.339	0.175	4.82934e-143	2.19376e-145	GO:1903779	regulation of cardiac conduction	19/2012	73/18866	0.000172525	0.00191637	0.00142246	ATP2B4/FXYD6/CALM3/CAMK2D/CALM1/CALM2/ANK2/ATP1A3/SLC8A2/ATP1B1/ATP2A2/ATP1B2/ATP1A2/STIM1/FLNA/ATP2B3/EHD3/ATP2B1/FKBP1B	19
SECISBP2L	4.92926e-147	0.212412	0.525	0.348	1.08513e-142	4.92926e-145	GO:0061337	cardiac conduction	31/2012	148/18866	0.000174743	0.0019374	0.00143807	SCN3B/ATP2B4/FXYD6/CALM3/CAMK2D/CALM1/YWHAE/CALM2/ANK2/BIN1/ATP1A3/SLC8A2/ATP1B1/GJA1/ATP2A2/ATP1B2/ATP1A2/CACNG3/CACNA2D1/KCNK1/SLC4A3/STIM1/SCN2B/CACNB1/FLNA/KCNIP3/ATP2B3/EHD3/ATP2B1/KCNIP2/FKBP1B	31
ANXA5	5.49774e-147	0.210929	0.406	0.234	1.21027e-142	5.49774e-145	GO:0030111	regulation of Wnt signaling pathway	63/2012	375/18866	0.000176453	0.00195275	0.00144946	APP/ATP6V0C/APOE/DKK3/SNX3/DAAM2/SOX10/CTNND2/RACK1/AMER2/ATP6AP2/DACT3/WNK1/PPP2CA/BTRC/ANKRD6/TLE5/CTDNEP1/ZEB2/PPP1CA/CDK14/DIXDC1/PSMB4/CTNNB1/CCNY/PPP2R1A/GPRC5B/TBL1XR1/GSKIP/PIN1/GNAQ/RBPJ/PFDN5/PSEN1/RBX1/DVL1/MESP1/UBE2B/FGFR2/PSMA4/LZTS2/PSME1/LRP1/APC2/TMEM170B/KLHL12/TNKS2/PSMD10/MAPK14/CSNK2A1/PSMD4/CUL3/CYLD/PSMD3/PSMB7/RNF146/CSNK1E/PSMB10/PSMF1/CDH2/PPM1B/RNF220/PSMD13	63
ELK1	8.5493e-147	0.22198	0.644	0.486	1.88204e-142	8.5493e-145	GO:0032272	negative regulation of protein polymerization	20/2012	79/18866	0.000177255	0.00195438	0.00145067	SNCA/TMSB4X/STMN1/TUBB4A/TMSB10/MAP2/STMN2/SPTBN1/MTPN/PFN1/CAPZB/CLIP3/SPTAN1/PRKCD/DMTN/CAPZA1/FKBP4/DYRK1A/RDX/CAPG	20
C1orf115	9.56804e-147	0.219863	0.768	0.647	2.10631e-142	9.56804e-145	GO:0043462	regulation of ATPase activity	20/2012	79/18866	0.000177255	0.00195438	0.00145067	DNAJA1/DNAJB2/DYNLL1/ATP1B1/ATP1B2/PFN1/DNAJB1/PXK/DYNLL2/ATP5IF1/NAPA/DNAL4/HSPA2/DHX9/DNAJB4/AHSA1/DNAJB6/HNRNPU/RAB4A/TPM1	20
DBNL	1.71608e-146	0.197802	0.454	0.276	3.77779e-142	1.71608e-144	GO:0051952	regulation of amine transport	22/2012	91/18866	0.000178048	0.00195951	0.00145448	SNCA/SNCG/SYT1/STX1A/ARL6IP1/ATP1A2/STXBP1/RAB3B/SV2A/ARL6IP5/SYT5/SYT17/DTNBP1/CHRNB2/RGS4/SYT4/ADORA1/PSEN1/HRH3/SYT7/RAB3GAP1/SLC12A2	22
PAFAH1B1	1.82852e-146	0.19489	0.889	0.811	4.02531e-142	1.82852e-144	GO:0060828	regulation of canonical Wnt signaling pathway	52/2012	295/18866	0.000190027	0.0020875	0.00154949	APOE/DKK3/DAAM2/SOX10/CTNND2/AMER2/DACT3/WNK1/BTRC/ANKRD6/TLE5/CTDNEP1/PPP1CA/CDK14/PSMB4/CTNNB1/CCNY/GPRC5B/TBL1XR1/GSKIP/PIN1/GNAQ/RBPJ/PFDN5/PSEN1/RBX1/DVL1/MESP1/UBE2B/FGFR2/PSMA4/LZTS2/PSME1/APC2/TMEM170B/KLHL12/TNKS2/PSMD10/MAPK14/PSMD4/CUL3/CYLD/PSMD3/PSMB7/RNF146/CSNK1E/PSMB10/PSMF1/CDH2/PPM1B/RNF220/PSMD13	52
SV2B	2.0824e-146	0.195705	0.924	0.845	4.5842e-142	2.0824e-144	GO:0071867	response to monoamine	25/2012	110/18866	0.000191685	0.00209417	0.00155443	APLP1/SNCA/ATP2B4/MAPK1/NSG2/APP/GNAO1/GNG2/SIRT2/MAPK3/CALY/CHRM1/ATF4/ARRB2/GNB1/PALM/DTNBP1/RGS4/GNAL/FLNA/ADCY5/NCSTN/HRH3/HDAC2/DNM2	25
KCNQ2	4.8991e-146	0.20519	0.78	0.67	1.07849e-141	4.8991e-144	GO:0071869	response to catecholamine	25/2012	110/18866	0.000191685	0.00209417	0.00155443	APLP1/SNCA/ATP2B4/MAPK1/NSG2/APP/GNAO1/GNG2/SIRT2/MAPK3/CALY/CHRM1/ATF4/ARRB2/GNB1/PALM/DTNBP1/RGS4/GNAL/FLNA/ADCY5/NCSTN/HRH3/HDAC2/DNM2	25
PDYN	5.89111e-146	0.126046	0.146	0.035	1.29687e-141	5.89111e-144	GO:0090175	regulation of establishment of planar polarity	25/2012	110/18866	0.000191685	0.00209417	0.00155443	AP2M1/PFN1/RAC1/CLTC/ARRB2/CDC42/ANKRD6/AP2S1/AP2B1/PSMB4/DVL1/RHOA/CELSR2/PSMA4/PSME1/AP2A2/PRICKLE2/PSMD10/DAAM1/PSMD4/PSMD3/PSMB7/PSMB10/PSMF1/PSMD13	25
MT-CO3	6.2753e-146	0.181714	1	1	1.38144e-141	6.2753e-144	GO:0010810	regulation of cell-substrate adhesion	41/2012	217/18866	0.000196709	0.00214513	0.00159226	APOD/MAP4K4/THY1/CALR/EDIL3/S100A10/GPM6B/SPOCK1/CX3CL1/RAC1/ARL2/PTK2/CDH13/FAM107A/PREX1/SEMA3E/CLASP2/CDC42/VEGFA/PRKCZ/PTEN/DOCK5/SPOCK2/DMTN/LIMCH1/FLNA/CRKL/PLEKHA2/RHOA/AJAP1/NF1/CLASP1/DUSP22/LRP1/P4HB/PTPRJ/CRK/PRKCE/DNM2/MINK1/DDR1	41
CYBA	1.20619e-145	0.207148	0.394	0.221	2.65532e-141	1.20619e-143	GO:0061025	membrane fusion	34/2012	169/18866	0.000197787	0.00215296	0.00159807	SNCA/CALR/NSF/SYT1/STX1A/CORO1A/PPIA/CD9/DNM1/VAMP2/STXBP1/SEPTIN8/RAB7A/OPA1/NAPA/VPS41/VAPA/CHP1/STX7/CPLX3/SYT4/RAB8B/STX4/RABEP1/DYSF/YKT6/SYT7/KIF5B/STX16/STX12/NAPG/DNM2/NSFL1C/TAPBP	34
MAPK3	1.63885e-145	0.190161	0.869	0.794	3.60776e-141	1.63885e-143	GO:0042273	ribosomal large subunit biogenesis	19/2012	74/18866	0.000209212	0.0022692	0.00168435	RPLP0/RPL7A/RPL24/RPL5/RPL11/RPL35/RPL7/RPL10A/RPL6/RPL10/RPL38/RPL3/RPL12/GTF3A/RPL14/NOL9/NHP2/RPL7L1/RPL26	19
ARL2	1.7171e-145	0.194136	0.848	0.762	3.78003e-141	1.7171e-143	GO:0055074	calcium ion homeostasis	75/2012	468/18866	0.000209225	0.0022692	0.00168435	HSP90B1/SNCA/ATP2B4/THY1/CALR/CALM3/CAMK2D/APP/TPT1/APOE/CALM1/YWHAE/CALM2/ANK2/PRNP/GRIA1/APLNR/LPAR1/SLC8A2/CORO1A/ATP1B1/GJA1/ATP2A2/CX3CL1/FKBP1A/ATP1A2/BOK/EDNRB/ATP2C1/SYNPO/CD24/PTGER3/NPTN/CYBA/CACNA2D1/NCS1/CAPN3/SV2A/BCAP31/GRIN2B/ATF4/KCTD17/TMEM165/STIM1/GNG3/GNB1/MYO5A/BNIP3/SPPL3/JPH4/ADORA1/GRIN1/CALB1/ADCY5/GRM5/SLC25A23/PSEN1/RAP1GDS1/GTF2I/TMBIM6/CCKBR/TSPOAP1/ATP2B3/LRP1/MICU3/…	75
PTK2	4.53176e-145	0.206323	0.548	0.369	9.97622e-141	4.53176e-143	GO:0098935	dendritic transport	6/2012	10/18866	0.000209647	0.00226965	0.00168469	KIF5C/SFPQ/TRAK2/HNRNPU/KIF5B/FLOT2	6
KCNAB2	9.40127e-145	0.185878	0.946	0.89	2.0696e-140	9.40127e-143	GO:0042590	antigen processing and presentation of exogenous peptide antigen via MHC class I	20/2012	80/18866	0.000212962	0.00229722	0.00170515	CALR/B2M/FCER1G/HLA-B/HLA-A/MFSD6/CYBA/PDIA3/PSMB4/LNPEP/PSMA4/PSME1/PSMD10/PSMD4/PSMD3/PSMB7/PSMB10/PSMF1/PSMD13/TAPBP	20
BSG	9.81504e-145	0.163673	0.994	0.983	2.16068e-140	9.81504e-143	GO:1900182	positive regulation of protein localization to nucleus	20/2012	80/18866	0.000212962	0.00229722	0.00170515	MAPK1/HSP90AB1/PRKCD/CCT5/RAN/TRIM8/TCP1/FLNA/PIK3R2/HCLS1/PSEN1/NUTF2/CCT2/PARP1/TARDBP/MAPK14/CDK5RAP3/CCT7/CCT3/IPO5	20
SNHG5	1.58543e-144	0.204659	0.354	0.189	3.49017e-140	1.58543e-142	GO:0010644	cell communication by electrical coupling	11/2012	31/18866	0.000220021	0.0023691	0.0017585	CALM3/CAMK2D/CALM1/CALM2/ATP1A3/ATP1B1/GJA1/ATP1B2/ATP1A2/ANK3/FKBP1B	11
AGPAT1	1.86288e-144	0.19962	0.577	0.401	4.10095e-140	1.86288e-142	GO:0006734	NADH metabolic process	13/2012	41/18866	0.000220933	0.00237037	0.00175945	TPI1/GAPDH/PGM2L1/PKM/ENO1/PGAM2/PFKP/HK1/GPI/ENO2/PGAM1/GPD2/MDH2	13
ATP6AP2	2.62345e-144	0.187025	0.869	0.797	5.77526e-140	2.62345e-142	GO:0007212	dopamine receptor signaling pathway	13/2012	41/18866	0.000220933	0.00237037	0.00175945	NSG2/GNAO1/GNG2/CALY/ARRB2/GNB1/PALM/DTNBP1/RGS4/GNAL/FLNA/ADCY5/NCSTN	13
CAMK1	8.86616e-144	0.194463	0.453	0.275	1.9518e-139	8.86616e-142	GO:0019058	viral life cycle	58/2012	341/18866	0.000224761	0.00240712	0.00178673	CD74/HSPA1A/HSP90AB1/CTSB/NCAM1/RPSA/APOE/UBA52/UBB/SNX3/PPIA/XPO1/MOG/CD81/PPIB/RAB7A/PHB/PI4KA/UBC/PCBP2/HSPA8/BST2/LAMP1/CDC42/HLA-DRB1/VAPA/IFITM3/RAN/HSPA1B/TRIM8/NECTIN1/LARP1/EFNB3/CHMP1B/TYRO3/CHMP1A/PPID/DDX5/ADAR/CNOT7/NEDD4L/RPS27A/PABPC1/PCBP1/STAU1/NUCKS1/NFIA/MVB12B/P4HB/BANF1/RAB5A/EPS15/ISG15/SEH1L/IST1/VAPB/RAB1A/KPNB1	58
DDAH1	4.65036e-143	0.184765	0.915	0.842	1.02373e-138	4.65036e-141	GO:0051955	regulation of amino acid transport	12/2012	36/18866	0.000226301	0.00241495	0.00179254	ARL6IP1/ATP1A2/STXBP1/SV2A/ARL6IP5/RGS4/SYT4/ADORA1/PSEN1/HRH3/RAB3GAP1/SLC12A2	12
OLIG1	8.90805e-143	0.24038	0.683	0.521	1.96102e-138	8.90805e-141	GO:2000310	regulation of NMDA receptor activity	12/2012	36/18866	0.000226301	0.00241495	0.00179254	APP/GRIA1/CNIH2/NEFL/GRIN2B/GRIA2/DLG2/DLG1/NLGN3/GRIA3/GRIN1/LRRC7	12
ATP6V1A	1.26066e-142	0.19509	0.877	0.794	2.77522e-138	1.26066e-140	GO:0010639	negative regulation of organelle organization	68/2012	416/18866	0.000227658	0.0024251	0.00180007	NUPR1/HSPA1A/SNCA/TMSB4X/STMN1/TUBB4A/TMSB10/CORO1A/HNRNPC/MAP2/STMN2/SPTBN1/MTPN/TMEFF2/BOK/MAP4/HNRNPA1/PFN1/CLU/PRKAR1A/MAPT/FEZ1/CAPZB/RAB7A/CLIP3/OPA1/SPTAN1/PRKCD/BAG4/ARRB2/TSPO/KAT2A/SET/CLASP2/TAOK1/MID1IP1/GMFB/CCP110/MAP6D1/DMTN/SYT4/CAPZA1/TERF2IP/BMERB1/BCL2L2/BNIP3/FKBP4/DYRK1A/ARAP1/ARHGEF2/RDX/TRIP12/PARP1/CLASP1/UBE2B/OTUB1/EVI5L/HNRNPU/CAPG/APC2/RBM14/NBDY/VAT1/TNKS2/PSMD10/BCL2…	68
YBX1	1.68222e-142	0.204653	0.533	0.35	3.70324e-138	1.68222e-140	GO:0031532	actin cytoskeleton reorganization	24/2012	105/18866	0.000232856	0.00247167	0.00183464	PAK1/ARHGDIA/ATP2C1/HRAS/CSF1R/ARHGDIB/BCAR1/BAIAP2/SEMA3E/CDC42/GRB2/DTNBP1/DMTN/FLNA/HCLS1/PARVB/ARAP1/RHOA/CDC42BPA/CDK5/HAX1/RAP2A/MINK1/MYH9	24
JPT1	1.96237e-142	0.218928	0.628	0.483	4.31996e-138	1.96237e-140	GO:0044070	regulation of anion transport	24/2012	105/18866	0.000232856	0.00247167	0.00183464	FABP3/APOE/MIF/PRNP/ARL6IP1/ATP1A2/ATP8A1/DBI/STXBP1/SV2A/ATP8A2/ARL6IP5/ATF4/PRKCD/CA2/RGS4/SYT4/ADORA1/STK39/GRM5/PSEN1/HRH3/RAB3GAP1/SLC12A2	24
MGAT3	2.28707e-142	0.198575	0.484	0.305	5.03476e-138	2.28707e-140	GO:0032868	response to insulin	50/2012	283/18866	0.000236033	0.00250094	0.00185637	FABP3/ATP6V0C/YWHAG/ATP6AP1/ATP6V1H/PKM/PAK1/ATP6V1B2/VAMP2/ATP6V1G2/ATP6V1A/AP3S1/ATP6V0E2/ATP6V0A1/ATP6V0B/ATP6V1C1/ADIPOR1/ATP6V1E1/OPA1/ATP6V0D1/PTPRN/PRKCD/BCAR1/PTPRA/BAIAP2/ATP6V1F/PRKCZ/PTEN/GRB2/MYO5A/CPEB2/SORT1/PIK3R2/SRSF6/RAB8B/ATP6V1D/HDAC5/PID1/NUCKS1/PARP1/GSTP1/STXBP3/SREBF1/RAB15/ATP2B1/SLC27A1/STAT1/SCAP/VGF/OSBPL8	50
ZFAND5	6.48347e-142	0.184598	0.933	0.879	1.42727e-137	6.48347e-140	GO:0006622	protein targeting to lysosome	9/2012	22/18866	0.000238716	0.0025249	0.00187415	LAMP2/CLU/RAB7A/HSPA8/SORT1/HGS/M6PR/GNPTAB/NCOA4	9
CCDC85B	6.81052e-142	0.181581	0.922	0.861	1.49927e-137	6.81052e-140	GO:0032869	cellular response to insulin stimulus	42/2012	226/18866	0.000240163	0.00253572	0.00188218	ATP6V0C/YWHAG/ATP6AP1/ATP6V1H/PKM/PAK1/ATP6V1B2/VAMP2/ATP6V1G2/ATP6V1A/AP3S1/ATP6V0E2/ATP6V0A1/ATP6V0B/ATP6V1C1/ADIPOR1/ATP6V1E1/OPA1/ATP6V0D1/PRKCD/BCAR1/PTPRA/BAIAP2/ATP6V1F/PRKCZ/PTEN/GRB2/MYO5A/CPEB2/PIK3R2/RAB8B/ATP6V1D/HDAC5/PID1/NUCKS1/PARP1/GSTP1/SREBF1/RAB15/ATP2B1/STAT1/OSBPL8	42
CD22	7.21447e-142	0.132646	0.129	0.027	1.58819e-137	7.21447e-140	GO:0006643	membrane lipid metabolic process	40/2012	212/18866	0.000240885	0.00253748	0.00188349	PSAP/SERINC1/ABCA2/ENPP2/UGT8/LARGE1/RACK1/SERINC3/ELOVL1/FA2H/PGAP1/PPP2CA/PRKCD/B3GALT2/B4GALNT1/PLPP2/VAPA/CERS6/ELOVL5/PPP2R1A/B3GALNT1/GBA/TEX2/CTSA/GLTP/PPT1/SPNS2/SPTLC2/SMPD1/CERS4/CERS2/ASAH1/PIGT/PDXDC1/ST3GAL5/ITGB8/TECR/PPM1L/VAPB/SAMD8	40
CLTC	1.5107e-141	0.182181	0.962	0.921	3.32567e-137	1.5107e-139	GO:0002474	antigen processing and presentation of peptide antigen via MHC class I	23/2012	99/18866	0.000241673	0.00253748	0.00188349	CALR/CANX/B2M/FCER1G/HLA-B/HLA-A/MFSD6/CYBA/BCAP31/PDIA3/PSMB4/LNPEP/PSMA4/PSME1/PSMD10/PSMD4/SAR1B/PSMD3/PSMB7/PSMB10/PSMF1/PSMD13/TAPBP	23
TMEM63A	2.12775e-141	0.179234	0.212	0.079	4.68403e-137	2.12775e-139	GO:0007044	cell-substrate junction assembly	23/2012	99/18866	0.000241673	0.00253748	0.00188349	APOD/MAP4K4/THY1/S100A10/GPM6B/RAC1/PTK2/ITGB4/FAM107A/CLASP2/VEGFA/PTEN/DMTN/LIMCH1/DST/CD151/RHOA/CLASP1/DUSP22/LRP1/PTPRJ/TLN1/PTPRK	23
CHN1	3.30538e-141	0.171639	1	0.995	7.27647e-137	3.30538e-139	GO:1990089	response to nerve growth factor	15/2012	52/18866	0.000242029	0.00253748	0.00188349	APP/SH3GL2/CORO1A/STMN2/HSPA5/MAPT/KIF1B/EEF2/KAT2A/DYNC1LI2/PTEN/ARPC3/SORT1/CRK/RAP1A	15
CLCN3	5.34527e-141	0.196186	0.512	0.332	1.17671e-136	5.34527e-139	GO:2000573	positive regulation of DNA biosynthetic process	18/2012	69/18866	0.000245683	0.00257128	0.00190858	HSP90AA1/MAPK1/HSP90AB1/PTGES3/HNRNPA2B1/HNRNPA1/MAPK3/ARRB2/CCT5/PAK3/CTNNB1/TCP1/PARM1/CCT2/NEK7/TNKS2/CCT7/CCT3	18
PDE4DIP	1.56396e-140	0.198659	0.809	0.714	3.44291e-136	1.56396e-138	GO:0008344	adult locomotory behavior	19/2012	75/18866	0.00025255	0.00263853	0.00195849	CNP/HIPK2/CNTN2/SNCG/APP/UCHL1/ATP1A2/PAFAH1B1/ARRB2/EFNB3/CHL1/SEZ6L/BTBD9/PPT1/CSTB/GRIN1/GLRB/WDR47/PUM1	19
FADS2	3.92519e-140	0.203822	0.601	0.435	8.6409e-136	3.92519e-138	GO:0000380	alternative mRNA splicing, via spliceosome	21/2012	87/18866	0.000253289	0.00264164	0.0019608	QKI/HNRNPA1/CELF5/MBNL2/FXR1/DHX9/RBM4/NOVA2/RBM10/DDX5/SRSF6/SFPQ/CELF3/DYRK1A/MBNL1/CELF2/CELF4/SRSF1/HNRNPU/RNPS1/SF1	21
CACNA2D1	3.96033e-140	0.201896	0.462	0.288	8.71827e-136	3.96033e-138	GO:0048194	Golgi vesicle budding	20/2012	81/18866	0.000254826	0.00265303	0.00196926	NSF/GRIA1/CNIH2/TMED9/NAPA/SERPINA1/PPP6R1/VAPA/TMED2/PEF1/TRAPPC1/TRAPPC2L/CNIH1/PREB/SCAP/KLHL12/VAPB/CUL3/SAR1B/RAB1A	20
RGS14	4.05351e-140	0.184039	0.32	0.163	8.92339e-136	4.05351e-138	GO:0001508	action potential	29/2012	138/18866	0.000262638	0.0027296	0.0020261	SCN3B/YWHAH/CAMK2D/YWHAE/ANK2/BIN1/SLC8A2/ATP1B1/GJA1/ATP2A2/ATP1A2/KCNMB4/NRCAM/KCNAB2/CACNA2D1/SLC4A3/ANK3/CHRNB2/SCN2B/DLG1/FLNA/GBA/CACNA1I/GNAQ/NEDD4L/CNTNAP1/KCNIP2/AKAP6/FKBP1B	29
PHB	4.93684e-140	0.199864	0.499	0.324	1.0868e-135	4.93684e-138	GO:0001952	regulation of cell-matrix adhesion	27/2012	125/18866	0.000264436	0.00273403	0.00202938	APOD/MAP4K4/THY1/S100A10/GPM6B/CX3CL1/RAC1/PTK2/CDH13/FAM107A/SEMA3E/CLASP2/VEGFA/PRKCZ/PTEN/DMTN/LIMCH1/PLEKHA2/RHOA/AJAP1/NF1/CLASP1/DUSP22/LRP1/PTPRJ/MINK1/DDR1	27
RABAC1	5.43363e-140	0.184478	0.904	0.844	1.19616e-135	5.43363e-138	GO:0008637	apoptotic mitochondrial changes	27/2012	125/18866	0.000264436	0.00273403	0.00202938	SOD2/HSPA1A/YWHAZ/YWHAH/YWHAB/YWHAG/YWHAE/HSPD1/YWHAQ/PPP2CB/BOK/CLU/ATP5IF1/OPA1/ARRB2/PDCD5/BCL2L2/BNIP3/IFI6/MLLT11/JUN/PPP3R1/NMT1/PSMD10/BCL2L1/RHOT1/BNIP3L	27
RPL8	6.97708e-140	0.158993	0.991	0.985	1.53593e-135	6.97708e-138	GO:0030968	endoplasmic reticulum unfolded protein response	27/2012	125/18866	0.000264436	0.00273403	0.00202938	HSP90B1/CALR/RHBDD2/CANX/PDIA6/DCTN1/BOK/HSPA5/RACK1/DDRGK1/ATP6V0D1/ATF4/HYOU1/MYDGF/TPP1/TMEM33/DERL1/PREB/EXTL3/SRPRA/SSR1/CDK5RAP3/VAPB/TLN1/HERPUD1/HDGF/CTDSP2	27
PLAAT3	4.87887e-139	0.206592	0.505	0.328	1.07404e-134	4.87887e-137	GO:0008542	visual learning	14/2012	47/18866	0.000267495	0.00276088	0.00204931	APP/ATP1A2/SYNPO/NDRG4/NPTN/RGS14/HMGCR/CHRNB2/NLGN3/GRIN1/NF1/SYNGAP1/CDK5/RIC8A	14
AGAP2	9.68098e-139	0.203339	0.651	0.486	2.13117e-134	9.68098e-137	GO:1900221	regulation of amyloid-beta clearance	8/2012	18/18866	0.00026977	0.00277956	0.00206317	APOE/CLU/LRPAP1/HMGCR/TREM2/IFNGR1/CYP51A1/LRP1	8
HRAS	1.05321e-138	0.196853	0.563	0.39	2.31854e-134	1.05321e-136	GO:0044794	positive regulation by host of viral process	7/2012	14/18866	0.000270283	0.00278005	0.00206354	APOE/CFL1/PPIB/CSF1R/HSPA8/VAPA/NUCKS1	7
TTC3	1.37255e-138	0.18431	0.895	0.817	3.02153e-134	1.37255e-136	GO:0001738	morphogenesis of a polarized epithelium	30/2012	145/18866	0.000276186	0.00283589	0.00210499	ACTB/AP2M1/PFN1/RAC1/PAFAH1B1/CLTC/ARRB2/CDC42/ANKRD6/AP2S1/AP2B1/WDR1/PSMB4/DVL1/RHOA/AJAP1/CELSR2/PSMA4/PSME1/EXOC5/AP2A2/PRICKLE2/PSMD10/DAAM1/PSMD4/PSMD3/PSMB7/PSMB10/PSMF1/PSMD13	30
SLCO1A2	6.28211e-138	0.198075	0.235	0.098	1.38294e-133	6.28211e-136	GO:0061640	cytoskeleton-dependent cytokinesis	23/2012	100/18866	0.000282669	0.00289747	0.0021507	ANLN/STMN1/SEPTIN3/CFL1/SEPTIN4/ARF1/SPTBN1/SEPTIN8/RTKN/ANK3/CHMP1B/CHMP1A/SEPTIN7/ACTR3/TRIM36/SEPTIN9/RHOA/LZTS2/SEPTIN2/ACTR2/JTB/IST1/RHOC	23
RAB2A	9.42847e-138	0.185804	0.875	0.801	2.07558e-133	9.42847e-136	GO:0048668	collateral sprouting	10/2012	27/18866	0.00028399	0.00290603	0.00215705	SPP1/APP/SEMA4D/COBL/ZEB2/SPART/IFRD1/DVL1/LRP1/IST1	10
PADI2	1.26064e-137	0.201622	0.373	0.211	2.77518e-133	1.26064e-135	GO:1903169	regulation of calcium ion transmembrane transport	31/2012	152/18866	0.000287981	0.00294184	0.00218363	SNCA/THY1/CALM3/CAMK2D/CALM1/YWHAE/CALM2/ANK2/BIN1/PRNP/APLNR/HPCA/CORO1A/ATP1B1/CX3CL1/FKBP1A/ATP1A2/CYBA/CACNA2D1/CAPN3/STIM1/HSPA2/MYO5A/CACNB1/JPH4/DYSF/EHD3/CDK5/PRKCE/AKAP6/FKBP1B	31
ENSA	3.10252e-137	0.180037	0.854	0.771	6.82989e-133	3.10252e-135	GO:0019693	ribose phosphate metabolic process	69/2012	427/18866	0.000288811	0.00294206	0.0021838	NUPR1/TMSB4X/SCD5/LDHA/APP/TPI1/GAPDH/AK5/PGM2L1/DDIT4/PKM/NUDT4/ATP5ME/PDE2A/DBI/ENO1/SCD/GUK1/PDE1A/PRPS1/ELOVL1/PGAM2/RFK/PFKP/OPA1/TKT/ACOT7/HMGCR/HK1/SULT4A1/TREM2/PDK3/GPI/ACSL4/RAN/ENO2/DLG2/GUCY1B1/ELOVL5/DLG1/FASN/PPT1/ADCY1/PDHA1/ACOT8/NME4/ADCY5/PSEN1/ATP5MC2/CMPK1/FAR1/PGAM1/PID1/ATP5MF/RHOA/PRKAG2/PARP1/SLC25A1/PAPSS1/ACLY/TECR/PDHB/AK4/NUDT16/HDAC4/SEH1L/ANTKMT/HMGCS1/HPRT1	69
RPL34	3.32933e-137	0.136133	0.999	1	7.32918e-133	3.32933e-135	GO:1904591	positive regulation of protein import	13/2012	42/18866	0.000289017	0.00294206	0.0021838	MAPK1/HSP90AB1/PRKCD/PDCD5/RAN/FLNA/PIK3R2/HCLS1/PSEN1/NUTF2/TARDBP/MAPK14/IPO5	13
KCNK1	3.45295e-137	0.210157	0.549	0.378	7.60133e-133	3.45295e-135	GO:0009260	ribonucleotide biosynthetic process	36/2012	186/18866	0.00028948	0.00294206	0.0021838	TMSB4X/SCD5/AK5/PKM/ATP5ME/ENO1/SCD/GUK1/ELOVL1/RFK/ACOT7/TREM2/PDK3/ACSL4/GUCY1B1/ELOVL5/FASN/PPT1/ADCY1/PDHA1/NME4/ADCY5/ATP5MC2/CMPK1/PID1/ATP5MF/PRKAG2/PARP1/SLC25A1/PAPSS1/ACLY/TECR/PDHB/AK4/ANTKMT/HPRT1	36
SH3GL3	4.91492e-137	0.214085	0.489	0.322	1.08197e-132	4.91492e-135	GO:0045070	positive regulation of viral genome replication	12/2012	37/18866	0.000302688	0.00305365	0.00226662	PPIA/PPIB/HSPA8/VAPA/LARP1/PPID/ADAR/CNOT7/PABPC1/STAU1/NUCKS1/VAPB	12
DNAJB1	4.9248e-137	0.22697	0.665	0.547	1.08414e-132	4.9248e-135	GO:1904358	positive regulation of telomere maintenance via telomere lengthening	12/2012	37/18866	0.000302688	0.00305365	0.00226662	MAPK1/HNRNPA2B1/HNRNPA1/MAPK3/CCT5/CTNNB1/TCP1/CCT2/NEK7/TNKS2/CCT7/CCT3	12
AP3S1	9.20711e-137	0.209685	0.558	0.387	2.02685e-132	9.20711e-135	GO:0045761	regulation of adenylate cyclase activity	11/2012	32/18866	0.000303188	0.00305365	0.00226662	TIMP2/HPCA/EDNRB/CAP2/STIM1/PALM/GRM3/GABBR2/CAP1/NF1/AKAP5	11
SERINC3	4.39394e-135	0.181428	0.909	0.848	9.67283e-131	4.39394e-133	GO:0070570	regulation of neuron projection regeneration	11/2012	32/18866	0.000303188	0.00305365	0.00226662	SPP1/THY1/MAP2K1/RTN4R/TNR/GRN/PTEN/CERS2/LRP1/PTPRF/FKBP1B	11
NOMO1	8.17638e-135	0.194992	0.379	0.219	1.79995e-130	8.17638e-133	GO:0097106	postsynaptic density organization	11/2012	32/18866	0.000303188	0.00305365	0.00226662	LRRTM1/NRXN2/PTEN/NLGN2/DLG2/DLG1/SYNGAP1/LRRTM2/PTPRD/CDH2/LRRC4B	11
ABR	9.29677e-135	0.174116	0.933	0.871	2.04659e-130	9.29677e-133	GO:0000381	regulation of alternative mRNA splicing, via spliceosome	19/2012	76/18866	0.000303525	0.00305365	0.00226662	QKI/HNRNPA1/CELF5/MBNL2/FXR1/RBM4/NOVA2/RBM10/DDX5/SRSF6/CELF3/DYRK1A/MBNL1/CELF2/CELF4/SRSF1/HNRNPU/RNPS1/SF1	19
RUFY3	2.24548e-134	0.185895	0.833	0.732	4.94321e-130	2.24548e-132	GO:0007632	visual behavior	15/2012	53/18866	0.00030465	0.00305468	0.00226739	APP/ATP1A2/SYNPO/NDRG4/NPTN/RGS14/HMGCR/CHRNB2/DYNLRB1/NLGN3/GRIN1/NF1/SYNGAP1/CDK5/RIC8A	15
PAPOLA	4.89904e-134	0.204641	0.58	0.42	1.07848e-129	4.89904e-132	GO:0045010	actin nucleation	15/2012	53/18866	0.00030465	0.00305468	0.00226739	ARF1/CORO1A/ARPC5/ARPC4/EVL/ARPC3/GMFB/ACTR3B/ABI2/ACTR3/ARPC1B/NCKAP1/BRK1/ACTR2/ARPC1A	15
TMEM30A	1.23899e-133	0.187065	0.844	0.751	2.72751e-129	1.23899e-131	GO:0009152	purine ribonucleotide biosynthetic process	34/2012	173/18866	0.000313247	0.00313561	0.00232746	TMSB4X/SCD5/AK5/PKM/ATP5ME/ENO1/SCD/GUK1/ELOVL1/ACOT7/TREM2/PDK3/ACSL4/GUCY1B1/ELOVL5/FASN/PPT1/ADCY1/PDHA1/NME4/ADCY5/ATP5MC2/PID1/ATP5MF/PRKAG2/PARP1/SLC25A1/PAPSS1/ACLY/TECR/PDHB/AK4/ANTKMT/HPRT1	34
NUMBL	1.24004e-133	0.183662	0.421	0.252	2.72982e-129	1.24004e-131	GO:0051963	regulation of synapse assembly	24/2012	107/18866	0.000314649	0.00314439	0.00233397	SNCA/CLSTN2/APP/SLIT1/CLSTN1/SEMA4D/GAP43/ADGRL3/PTK2/SEMA4A/LRRTM1/EIF4G1/NECTIN1/NLGN2/CHRNB2/NLGN3/ADGRB2/CLSTN3/GRIN1/ADGRB3/LRRTM2/PTPRD/SLITRK1/LRRC4B	24
GABBR1	1.38905e-133	0.17767	0.908	0.846	3.05786e-129	1.38905e-131	GO:0071456	cellular response to hypoxia	39/2012	208/18866	0.000326459	0.00325696	0.00241754	HIPK2/UBA52/UBB/AQP1/SIRT2/ENO1/DDAH1/UBC/B3GAT1/OPA1/NDRG1/PDK3/GNB1/VEGFA/ELOB/PTEN/HYOU1/CPEB2/PSMB4/BNIP3/RBPJ/RPS27A/RBX1/TMBIM6/EGLN2/PSMA4/PSME1/P4HB/PRKCE/AK4/PSMD10/MDM2/PSMD4/PSMD3/PSMB7/PSMB10/PSMF1/BNIP3L/PSMD13	39
PXK	1.87608e-133	0.214138	0.37	0.214	4.13001e-129	1.87608e-131	GO:0032147	activation of protein kinase activity	56/2012	331/18866	0.000327927	0.00326616	0.00242436	CHI3L1/TF/PEA15/CD74/MAP4K4/MAPK1/MAP2K1/UBA52/UBB/SOD1/PRNP/LPAR1/RPLP1/PAK1/CD81/PRKAR1A/TXN/CDK5R1/DBNL/MAPK3/PHB/AGAP2/FGF1/ERP29/WNK1/UBC/MAPK8IP3/PRKCD/PRKACB/GNG3/VEGFA/TAOK1/PAK3/PRKCZ/DLG1/PRKAR1B/GPRC5B/ADORA1/CRKL/UBE2N/ADCY1/STK39/ADCY5/RPS27A/PSEN1/PRKAG2/DUSP7/LAMTOR2/CRK/MAP4K5/MAPK14/MAP2K4/OSBPL8/COPS8/ZFP91/MINK1	56
GALNT17	1.92073e-133	0.196811	0.585	0.417	4.2283e-129	1.92073e-131	GO:0042116	macrophage activation	23/2012	101/18866	0.000329656	0.00327791	0.00243309	C1QA/CD74/SNCA/APP/MIF/AIF1/HSPD1/CX3CL1/ITGB2/VSIG4/TYROBP/CLU/MAPT/PJA2/GRN/TREM2/IFNGR1/NR1D1/JUN/CEBPA/DYSF/CD200/PRKCE	23
NCS1	2.5735e-133	0.18351	0.965	0.936	5.66531e-129	2.5735e-131	GO:0048284	organelle fusion	29/2012	140/18866	0.000338964	0.00336487	0.00249763	SNCA/CALR/SYT1/STX1A/CORO1A/ENO1/VAMP2/STXBP1/SEPTIN8/RAB7A/OPA1/VPS41/STX7/ENO2/CPLX3/GDAP1/SYT4/BNIP3/RAB8B/STX4/DYSF/PID1/SYT7/VAT1/KIF5B/MIGA1/STX16/STX12/TAPBP	29
RPL7	2.88402e-133	0.171755	0.968	0.95	6.34887e-129	2.88402e-131	GO:0010799	regulation of peptidyl-threonine phosphorylation	14/2012	48/18866	0.000340967	0.00337913	0.00250822	CHI3L1/MAPK1/CALM3/APP/CALM1/CALM2/DDIT4/SIRT2/SPRED1/EIF4G1/DMTN/CADM4/UBE2K/PRKAG2	14
CLTA	4.90716e-133	0.186749	0.849	0.766	1.08026e-128	4.90716e-131	GO:0034250	positive regulation of cellular amide metabolic process	33/2012	167/18866	0.000343546	0.00339906	0.00252301	MAPK1/APP/ABCA2/PKM/UHMK1/RPL5/RPL30/CLU/RACK1/RPS9/UQCC2/MAPK3/PRKCD/EIF5A/FXR1/EEF2/KRT17/DHX9/PICALM/EIF4G1/LARP1/IFNGR1/NGRN/PABPC1/SLC2A13/RHOA/LARP6/CTIF/RPL26/EIF3E/YTHDF3/YTHDF2/VIM	33
BACE1	6.80975e-133	0.200588	0.438	0.274	1.4991e-128	6.80975e-131	GO:0022037	metencephalon development	25/2012	114/18866	0.000344202	0.00339992	0.00252365	MAP2K1/FAIM2/PSAP/AIF1/LPAR1/CNTN1/MTPN/PAK1/NEUROD2/HSPA5/CDK5R1/SSTR1/KAT2A/SSTR2/CDK5R2/SEZ6L/GNPAT/CRKL/GRIN1/PSEN1/NCSTN/CRK/CDK5/SLC25A46/ATRN	25
HAPLN2	8.85263e-133	0.214342	0.349	0.194	1.94882e-128	8.85263e-131	GO:0035308	negative regulation of protein dephosphorylation	17/2012	65/18866	0.000350184	0.00344761	0.00255905	PPP1R14A/ARPP19/YWHAB/YWHAE/FKBP1A/PHACTR3/ENSA/PTPA/ELFN2/SET/PPP1R16B/PPP4R4/PPP1R10/CABIN1/PPP1R11/FKBP1B/PPP1R37	17
FGF1	9.35724e-133	0.227737	0.526	0.36	2.0599e-128	9.35724e-131	GO:0048278	vesicle docking	17/2012	65/18866	0.000350184	0.00344761	0.00255905	NSF/SYT1/STX1A/NDRG4/STXBP1/RAB3B/RAB3C/STX7/SYTL2/RAB8B/STX4/YKT6/STXBP3/RAB15/PPFIA3/STX16/STX12	17
CALY	1.13911e-132	0.168731	0.975	0.942	2.50764e-128	1.13911e-130	GO:1901019	regulation of calcium ion transmembrane transporter activity	21/2012	89/18866	0.000353466	0.0034742	0.00257878	CALM3/CAMK2D/CALM1/YWHAE/CALM2/ANK2/HPCA/ATP1B1/FKBP1A/ATP1A2/CACNA2D1/STIM1/HSPA2/MYO5A/CACNB1/JPH4/DYSF/EHD3/CDK5/AKAP6/FKBP1B	21
ATP6V0E2	1.22109e-132	0.173854	0.898	0.828	2.6881e-128	1.22109e-130	GO:0000715	nucleotide-excision repair, DNA damage recognition	9/2012	23/18866	0.000355234	0.00347444	0.00257896	UBA52/UBB/RAD23B/UBC/COPS7A/RPS27A/RBX1/PARP1/COPS8	9
CMAS	1.31831e-132	0.200612	0.627	0.473	2.90212e-128	1.31831e-130	GO:0034643	establishment of mitochondrion localization, microtubule-mediated	9/2012	23/18866	0.000355234	0.00347444	0.00257896	UCHL1/UBB/NEFL/MAPT/KIF1B/FEZ1/OPA1/TRAK2/RHOT1	9
PRAF2	4.89522e-132	0.192267	0.511	0.336	1.07763e-127	4.89522e-130	GO:0047497	mitochondrion transport along microtubule	9/2012	23/18866	0.000355234	0.00347444	0.00257896	UCHL1/UBB/NEFL/MAPT/KIF1B/FEZ1/OPA1/TRAK2/RHOT1	9
CAMK2N1	1.67049e-131	0.166759	0.997	0.997	3.67742e-127	1.67049e-129	GO:0150076	neuroinflammatory response	19/2012	77/18866	0.000363236	0.00354689	0.00263274	C1QA/NUPR1/SNCA/APP/AIF1/CX3CL1/ITGB2/TYROBP/CLU/MAPT/GRN/TREM2/IFNGR1/NR1D1/ADCY1/JUN/PSEN1/CD200/LRP1	19
PCDH17	1.98202e-131	0.181746	0.313	0.162	4.36322e-127	1.98202e-129	GO:0051271	negative regulation of cellular component movement	65/2012	400/18866	0.000365043	0.00355872	0.00264152	CD74/APOD/ATP2B4/THY1/CALR/APOE/MIF/BIN1/AIF1/DNAJA4/GJA1/CNIH2/ATP1B2/CX3CL1/SEMA3D/CD9/TMEFF2/ADGRG1/DPYSL3/SEMA4D/SPRED1/NDRG4/CLIC4/PTPRR/PADI2/ABR/IGFBP5/ADIPOR1/RAP2B/BST2/EVL/SEMA4F/SEMA4A/TIMP1/ARHGDIB/SEMA3E/CLASP2/RIPOR2/PTEN/ABHD6/SPINT2/LIMCH1/BMERB1/ADORA1/SEMA6B/PIN1/HDAC5/NISCH/CD200/CERS2/RHOA/NF1/CLASP1/SRGAP2/GSTP1/DUSP22/LRP1/PTPRJ/CRK/LDLRAD4/RAP2A/OSBPL8/TPM1/PTPRK/PTPRT	65
PTPA	3.91745e-131	0.177328	0.848	0.765	8.62387e-127	3.91745e-129	GO:0060249	anatomical structure homeostasis	74/2012	469/18866	0.000369115	0.00359255	0.00266664	SERPINA3/MBP/SPP1/HSPB1/TF/SLC17A7/HSP90AA1/MAPK1/HSP90AB1/DNAJB2/SH3GL2/PTGES3/ACTB/SOD1/B2M/SLC8A2/CORO1A/HNRNPC/GJA1/ATP1B2/ATP6AP1/CX3CL1/LAMP2/HNRNPA2B1/DCTN1/LARGE1/HNRNPA1/JAM3/TP53INP2/LIPA/RAC1/MAPK3/NCS1/CAPN3/POLE4/CSF1R/NELL2/CA2/VEGFA/CCT5/TAOK1/PRDX1/RBP4/TYRO3/NOP10/TERF2IP/CTNNB1/TCP1/CDHR1/ADORA1/CALB1/STK39/CFL2/CCT2/TUB/TPP1/PARP1/TSPOAP1/NF1/NHP2/ATP2B3/HNRNPU/PPP1R10/ATP2B1/C…	74
MOB1B	3.93234e-131	0.198551	0.408	0.241	8.65666e-127	3.93234e-129	GO:0061462	protein localization to lysosome	13/2012	43/18866	0.000374213	0.00363625	0.00269907	RTN4/LAMP2/CACNG3/CD81/CLU/RAB7A/HSPA8/SORT1/HGS/M6PR/GNPTAB/NCOA4/LAMTOR4	13
PRMT2	9.22606e-131	0.207581	0.642	0.507	2.03102e-126	9.22606e-129	GO:0009259	ribonucleotide metabolic process	67/2012	416/18866	0.000385545	0.00374029	0.00277629	NUPR1/TMSB4X/SCD5/LDHA/APP/TPI1/GAPDH/AK5/PGM2L1/DDIT4/PKM/NUDT4/ATP5ME/PDE2A/DBI/ENO1/SCD/GUK1/PDE1A/ELOVL1/PGAM2/RFK/PFKP/OPA1/ACOT7/HMGCR/HK1/SULT4A1/TREM2/PDK3/GPI/ACSL4/RAN/ENO2/DLG2/GUCY1B1/ELOVL5/DLG1/FASN/PPT1/ADCY1/PDHA1/ACOT8/NME4/ADCY5/PSEN1/ATP5MC2/CMPK1/FAR1/PGAM1/PID1/ATP5MF/RHOA/PRKAG2/PARP1/SLC25A1/PAPSS1/ACLY/TECR/PDHB/AK4/NUDT16/HDAC4/SEH1L/ANTKMT/HMGCS1/HPRT1	67
[truncated: 1,548 more rows]

## Sheet: AD downregulated 89 genes
AD downregulated DEGs were selected if the adjusted p-value was less than 0.05 and the absolute value of log-fold change was higher than 0.1. GeneRatio is in N/M format where M is the number of total genes in this list that match the GO term, while N represents the number of genes matches the genes in a certain pathway (or Count, in column P). Similarly, the numbers in BgRatio represent the total…
[truncated: 272 more rows]

[truncated: 1 more sheets: Overlapped genes ]
