# Supplementary material for: Spatially resolved transcriptomics reveals gene signatures underlying the vulnerability of human middle temporal gyrus in Alzheimer's disease
Source: Research Square preprint supplement (doi:10.21203/rs.3.rs-855234/v1), 2021-09-10
Supplement: Supplementary file 11 [file 145276f340a03affc6ede474.xlsx]

## Sheet: pathology associate spot
The number of each pathology positive spots and corresponding level spots in AD samples are listed. The Percentage of spots with certain pathology indicates the distribution of the pathology positive spots in different layers.
AD-1	Layer 2	Layer 3	Layer 4	Layer 5	Layer 6	White Matter	Total		AD-2	Layer 1	Layer 2	Layer 3	Layer 4	Layer 5	Layer 6	White Matter	Total
Aβ	139	249	70	155	135	35	783		Aβ	75	123	200	65	124	44	0	631
Percentage of spots with Aβ	0.177522	0.318008	0.0893997	0.197957	0.172414	0.0446999			Percentage of spots with Aβ	0.118859	0.194929	0.316957	0.103011	0.196513	0.0697306	0
Aβ_level1	98	283	114	212	220	90	1017		Aβ_level1	136	235	312	122	237	89	7	1138
Aβ_level2	26	84	40	54	92	97	393		Aβ_level2	118	124	251	104	190	100	16	903
Aβ_level3	13	32	11	19	42	106	223		Aβ_level3	54	49	152	60	147	72	26	560
not defined	10	38	10	42	8	783	891		not defined	26	16	118	65	166	177	925	1493
	286	686	245	482	497	1111	3307		Total	409	547	1033	416	864	482	974	4725
AT8	227	319	91	220	150	73	1080		AT8	12	42	167	104	249	108	22	704
Percentage of spots with AT8	0.210185	0.29537	0.0842593	0.203704	0.138889	0.0675926			Percentage of spots with AT8	0.0170455	0.0596591	0.237216	0.147727	0.353693	0.153409	0.03125
AT8_level1	51	253	102	195	234	171	1006		AT8_level1	57	139	347	134	282	217	104	1280
AT8_level2	5	85	36	56	105	192	479		AT8_level2	67	110	265	84	109	99	145	879
AT8_level3	0	19	13	11	8	196	247		AT8_level3	70	109	132	54	76	31	163	635
not defined	3	10	3	0	0	479	495		not defined	203	147	122	40	148	27	540	1227
	286	686	245	482	497	1111	3307		Total	409	547	1033	416	864	482	974	4725
AT8_Aβ	60	64	9	40	35	4	212		AT8_Aβ	0	3	44	9	5	0	0	61
Percentage of spots with AT8_Aβ	0.283019	0.301887	0.0424528	0.188679	0.165094	0.0188679			Percentage of spots with AT8_Aβ	0	0.0491803	0.721311	0.147541	0.0819672	0	0
AT8_Aβ_level1	134	182	55	142	123	19	655		AT8_Aβ_level1	2	24	152	41	18	0	0	237
AT8_Aβ_level2	55	131	60	115	133	22	516		AT8_Aβ_level2	5	53	192	58	28	0	0	336
AT8_Aβ_level3	24	90	66	52	82	42	356		AT8_Aβ_level3	10	63	211	47	46	1	0	378
not defined	13	219	55	133	124	1024	1568		not defined	392	404	434	261	767	481	974	3713
Total	286.283	686.302	245.042	482.189	497.165	1111.02	3307		Total	409	547.049	1033.72	416.148	864.082	482	974	4725
GFAP_AT8_Aβ	42	47	16	43	34	9	191		GFAP_AT8_Aβ	14	13	40	9	14	4	0	94
Percentage of spots with GFAP_AT8_Aβ	0.219895	0.246073	0.0837696	0.225131	0.17801	0.0471204			Percentage of spots with GFAP_AT8_Aβ	0.148936	0.138298	0.425532	0.0957447	0.148936	0.0425532	0
GFAP_AT8_Aβ_level1	113	160	64	155	134	58	684		GFAP_AT8_Aβ_level1	57	71	173	44	62	25	3	435
GFAP_AT8_Aβ_level2	68	145	74	127	154	89	657		GFAP_AT8_Aβ_level2	62	116	237	78	90	49	5	637
GFAP_AT8_Aβ_level3	31	132	53	72	88	102	478		GFAP_AT8_Aβ_level3	57	107	225	74	109	54	13	639
not defined	32	202	38	85	87	853	1297		not defined	219	240	358	211	589	350	953	2920
Total	286.22	686.246	245.084	482.225	497.178	1111.05	3307		Total	409.149	547.138	1033.43	416.096	864.149	482.043	974	4725
P2RY12_AT8_Aβ	21	48	9	36	41	4	159		P2RY12_AT8_Aβ	3	2	17	10	25	12	0	69
Percentage of spots with P2RY12_AT8_Aβ	0.132075	0.301887	0.0566038	0.226415	0.257862	0.0251572			Percentage of spots with P2RY12_AT8_Aβ	0.0434783	0.0289855	0.246377	0.144928	0.362319	0.173913	0
P2RY12_AT8_Aβ_level1	68	217	57	155	174	31	702		P2RY12_AT8_Aβ_level1	12	17	86	61	136	59	3	374
P2RY12_AT8_Aβ_level2	57	180	71	143	122	50	623		P2RY12_AT8_Aβ_level2	17	39	168	95	204	86	12	621
P2RY12_AT8_Aβ_level3	32	106	66	71	72	50	397		P2RY12_AT8_Aβ_level3	20	53	204	89	195	79	18	658
not defined	108	135	42	77	88	976	1426		not defined	357	436	558	161	304	246	941	3003
Total	286.132	686.302	245.057	482.226	497.258	1111.03	3307		Total	409.043	547.029	1033.25	416.145	864.362	482.174	974	4725
notice: red color values indicate the DEGs cannot be computed
