# Supplementary material for: Spatially resolved transcriptomics reveals gene signatures underlying the vulnerability of human middle temporal gyrus in Alzheimer's disease
Source: Research Square preprint supplement (doi:10.21203/rs.3.rs-855234/v1), 2021-09-10
Supplement: Supplementary file 13 [file 3fcddea9f7d6ff0d7f2ca49a.xlsx]

## Sheet: Layer 2_AD_up_DEG
This spreadsheet is derived from DEGs analysis by comparing gene expression between AD and CT from Layer 2. Column A indicates gene ID. Column B indicates the number of overlapping genes from four comparisons. Column G to column J indicates the log fold change of four comparisons.
Gene	contribution summary					logFC (e as base, cutoff >= 0.25)				adjusted p-value (Wilcoxon test, cutoff <= 0.05)
ID	overlap	AD1 vs CT1	AD2 vs CT2	AD1 vs CT2	AD2 vs CT2	Layer 2_up_logFC_AD1_CT1	Layer 2_up_logFC_AD2_CT1	Layer 2_up_logFC_AD1_CT2	Layer 2_up_logFC_AD2_CT2	Layer 2up_Adj.pval_AD1_CT1	Layer 2up_Adj.pval_AD2_CT1	Layer 2up_Adj.pval_AD1_CT2	Layer 2up_Adj.pval_AD2_CT2
APOC1	4	1	1	1	1	0.419403078811147	0.684176112731892	0.2559333741372	0.520706408057946	2.52096130127994e-26	2.72477657742376e-83	6.83245602618814e-08	2.13164412275324e-50
ATP2B4	4	1	1	1	1	0.291709239481862	0.380003065921811	0.571759795190222	0.66005362163017	1.5689066752841e-10	3.77157705857247e-29	9.12029966409597e-42	1.54622130947441e-75
ATP6V1H	4	1	1	1	1	0.305271938683228	0.360206019720145	0.404641723952959	0.459575804989876	3.75798741368097e-13	1.99376297169984e-30	1.71650869631208e-23	1.16357864749861e-46
BAIAP3	4	1	1	1	1	0.417916405499204	0.29583363241202	0.505342402351459	0.383259629264276	5.36378953599358e-28	3.33935918465852e-15	3.25155957018629e-37	9.76175198825508e-28
CAMK2D	4	1	1	1	1	0.523312039065411	0.489117720005353	0.407236587756546	0.373042268696488	3.77935891734351e-31	2.44594586411064e-44	2.8004960379144e-19	2.53023399393728e-27
CRYAB	4	1	1	1	1	0.462551469326165	1.18839574976837	0.379986022807179	1.10583030324938	2.80465297065855e-33	3.70786982666722e-174	1.25950062054684e-24	1.72077712692959e-174
CRYM	4	1	1	1	1	0.384155820005969	0.254879169949063	0.415802523341085	0.286525873284179	5.45988873472934e-18	2.10057796507533e-09	3.19787142375098e-22	5.80158598884292e-14
CTXN1	4	1	1	1	1	0.46311033686604	0.44639932866548	0.527956663696174	0.511245655495615	1.9951599194626e-40	1.04662380575438e-55	5.75596152630894e-49	2.34064365766584e-68
DDN	4	1	1	1	1	0.353123663719859	0.407627474126	0.299986256257075	0.354490066663216	2.90956417669784e-19	2.05451361533295e-40	8.02965578748422e-14	9.06600910482942e-31
FBXL16	4	1	1	1	1	0.263170310352182	0.298585937690989	0.285500613976382	0.32091624131519	7.52211104762151e-14	3.46304326353575e-29	1.03475488242302e-16	6.52260379762426e-34
GABRA5	4	1	1	1	1	0.612451854587097	0.490777471423717	0.528687798085337	0.407013414921958	8.12829105770076e-59	4.43913384746959e-50	1.28065056326291e-43	2.02638351537925e-34
GFAP	4	1	1	1	1	0.449032504323777	0.887101675534273	1.05596713958634	1.49403631079684	1.00334187505877e-90	4.06325603912154e-191	3.76431234210466e-127	2.1175623939896e-199
HPCAL4	4	1	1	1	1	0.401862919306472	0.478190193207471	0.333476727641415	0.409804001542414	1.22412034861724e-25	1.18046264019508e-59	4.21813734033991e-17	1.105920429338e-44
MAPK1	4	1	1	1	1	0.472705093147092	0.442131037042531	0.409654144211675	0.379080088107114	1.8981679458804e-42	2.32351844224452e-47	1.12447940788195e-30	2.75906698123347e-34
MMD	4	1	1	1	1	0.495713662427722	0.459727711119719	0.437586461397588	0.401600510089586	3.137865667332e-32	1.31849616307601e-39	5.35513156926457e-26	4.06288857258015e-32
NCAM2	4	1	1	1	1	0.359817140407548	0.262841778212539	0.402151103418127	0.305175741223118	1.16103167043334e-16	2.29527676920097e-10	2.04186574381317e-22	4.60354513518145e-17
NPTX1	4	1	1	1	1	0.550749474073002	0.528191688165263	0.480167577045408	0.457609791137669	8.99703507243686e-57	1.25412299876198e-56	4.38781194727797e-43	3.364345698953e-43
NPTXR	4	1	1	1	1	0.496044195705115	0.65423695834319	0.392530161759681	0.550722924397755	1.77673412217394e-48	4.12187504374925e-107	1.02136902954336e-32	1.0146242102418e-84
NSF	4	1	1	1	1	0.353052628219556	0.324535295309604	0.328720963188047	0.300203630278096	4.21136679762461e-22	2.32965329884052e-30	2.18473290124953e-18	3.84382666587897e-25
PEA15	4	1	1	1	1	0.44927980412519	0.561556394577206	0.419120819657737	0.531397410109753	7.14886394828802e-63	1.73692806257639e-120	4.08223149162529e-52	8.22057636643135e-106
PEG10	4	1	1	1	1	0.605634629465313	0.402387734463966	0.602053726787926	0.398806831786579	1.70458265728144e-33	3.2852987839576e-27	4.11161055896917e-34	1.22327423368743e-28
PGBD5	4	1	1	1	1	0.364620236753773	0.312744227320539	0.361268062348198	0.309392052914963	1.43013169343715e-14	1.70606682648828e-15	1.12574006279284e-15	3.83858546337813e-17
PLP1	4	1	1	1	1	0.938168803352191	0.302306436670463	1.14823930480163	0.512376938119902	1.24842028907747e-74	1.99266659365333e-20	1.10259768005808e-95	4.31108838763961e-50
PLPPR4	4	1	1	1	1	0.491554170491889	0.415058802647483	0.567664395602259	0.491169027757852	1.0111572871319e-31	1.06783427734803e-30	2.84474925733281e-43	9.64521781261447e-46
PMP2	4	1	1	1	1	0.367865604541327	0.521618058492446	0.265760754491696	0.419513208442814	1.08265762413674e-18	1.30459153127011e-47	7.8244030535937e-10	3.48571307153906e-32
PRKCG	4	1	1	1	1	0.35479934870901	0.288049975932618	0.516091992024383	0.449342619247991	5.57693910454367e-17	5.41993303340998e-13	1.92858157477598e-36	5.47315020234589e-37
RUNDC3A	4	1	1	1	1	0.310160449611948	0.312524571570497	0.263869617972144	0.266233739930693	7.28480928139986e-19	5.67750616866741e-25	5.04052665583394e-12	6.97329693075621e-17
SCN3B	4	1	1	1	1	0.371872466997797	0.316616966910457	0.375042550509714	0.319787050422374	7.44843787101782e-21	8.67989216733478e-21	5.85368555440267e-21	7.21566637853377e-22
SLC17A7	4	1	1	1	1	0.60987078813397	0.404123507318503	0.645070558013127	0.43932327719766	4.30541707820945e-89	2.30517554271452e-58	1.55905743560416e-92	1.6572063807169e-66
STUM	4	1	1	1	1	0.293436382363967	0.355257611251968	0.283228362051409	0.34504959093941	3.42205594232771e-17	6.52507458788021e-33	1.08219150867607e-17	1.97584005308187e-33
SYN2	4	1	1	1	1	0.554032405006357	0.478890594436961	0.630021288559672	0.554879477990277	6.27023734361738e-55	1.86765004256959e-60	5.42399114572196e-64	1.39553681602315e-74
ADGRG1	3	1	1	0	1	0.336479691824759	0.440269414610869	0	0.285075546706533	7.16083033084272e-15	5.32299993042402e-36	0	7.63627264947551e-15
AEBP1	3	0	1	1	1	0	0.29662145698276	0.303186258987746	0.41736547424299	0	5.8956939929188e-21	7.40793827171896e-37	5.33017827593403e-57
APLP1	3	1	0	1	1	0.274572872863285	0	0.485896240723465	0.405892432324699	2.70154421141474e-17	0	2.91677458444365e-46	6.94119689415165e-49
AQP4	3	1	1	0	1	0.478586449858855	0.706620498032124	0	0.302579404775006	2.4261801165571e-34	2.72258581321659e-86	0	2.90845733390537e-17
ARPP21	3	1	0	1	1	0.250050083076478	0	0.362361467562697	0.267833740272026	2.81202107504175e-06	0	8.20379818317233e-18	2.36204485127967e-13
ATP1B2	3	1	1	0	1	0.353932985357406	0.490236492238222	0	0.267412953394368	2.39042068637581e-18	1.37011743154983e-53	0	4.1277844195771e-16
C3	3	1	1	0	1	0.318482508511017	0.814248316829051	0	0.652100689960133	3.14873921368056e-17	2.35610563646516e-101	0	1.38458713990409e-70
CANX	3	1	1	0	1	0.320428123133184	0.436752219415805	0	0.250804805997582	1.17111426180114e-15	5.06801330961423e-48	0	4.04876619081434e-17
CD63	3	1	1	0	1	0.272300628121783	0.472354843870681	0	0.271883968571049	1.96394341061353e-10	4.31761993642732e-53	0	4.70548417469853e-19
CD74	3	1	1	0	1	0.475527635204209	0.611729157140254	0	0.278309809663967	2.06192538223288e-29	1.03771551885691e-61	0	2.54360493409576e-14
CNIH2	3	1	1	1	0	0.441582364494957	0.289946948574803	0.375820391523167	0	8.68160295106928e-29	4.66417741622619e-15	6.29106176278162e-21	0
GDA	3	1	1	1	0	0.454237286827825	0.287395540891886	0.312913550742919	0	3.47658799252551e-28	4.17920234416752e-15	3.64348428714384e-13	0
GNG2	3	1	0	1	1	0.26476382935796	0	0.351103898889277	0.266563092070571	7.38538488126579e-09	0	3.86812883376384e-18	4.10924365017274e-15
HLA-A	3	1	1	0	1	0.258308686208887	0.453233356528913	0	0.261380212447253	6.55967800439761e-07	1.89812895056541e-33	0	2.80493481068366e-10
HOPX	3	1	1	0	1	0.270816283668612	0.471528935873368	0	0.353443575336368	1.03063164087325e-16	6.71271808286551e-71	0	3.32707826376091e-41
HSP90AB1	3	0	1	1	1	0	0.311983123140533	0.271792402687533	0.394217991096911	0	6.31058254030973e-55	2.69091310852963e-28	1.32445132532846e-76
HSPH1	3	0	1	1	1	0	0.353746558370003	0.260771161328566	0.642184769560568	0	1.17483268287173e-27	5.13273298470396e-10	1.19858362087573e-77
LINGO1	3	1	1	1	0	0.463762793624623	0.292067206361326	0.420674526771693	0	6.31811462442484e-33	2.07899124294171e-14	8.11824516098792e-27	0
MAST3	3	1	1	0	1	0.260831020704352	0.28885106997111	0	0.271201376756865	1.09174983196372e-13	8.39525633158553e-23	0	2.0155532168355e-19
MBP	3	1	1	1	0	1.25886894059733	0.346483310219002	0.941619228129671	0	3.26078166731952e-126	1.5855137165651e-34	1.68566531360282e-115	0
MT-ND3	3	1	1	0	1	0.773610941139387	0.828716605451941	0	0.255680431595067	2.83528762386683e-128	8.3125194475995e-196	0	1.9827058313107e-90
MTRNR2L1	3	1	1	1	0	3.29831602443176	0.4021291649476	2.80202206979603	0	1.41895533174982e-143	1.10665677349159e-33	1.80106562164626e-134	0
NCS1	3	1	1	0	1	0.288160296046815	0.434354398345905	0	0.295173572608392	9.43071766559131e-13	6.68533817880713e-47	0	5.82924818438423e-23
NECAB2	3	0	1	1	1	0	0.308074889668018	0.250217963079167	0.385807342865623	0	1.17306245061781e-18	4.37314156993011e-09	3.69353929389048e-31
NSG2	3	0	1	1	1	0	0.300941465847837	0.36738491861561	0.461047354773223	0	1.74710576451673e-17	1.6133726226664e-17	5.47674238917866e-41
PAK1	3	0	1	1	1	0	0.269395796285274	0.28889492887699	0.474137261752466	0	1.56120896978317e-15	1.8354606373413e-11	1.11308469620409e-44
PDE2A	3	1	1	1	0	0.378457206867856	0.271102150414523	0.328720259816895	0	2.49586564647535e-23	3.8407559134989e-14	1.95481862479027e-16	0
PGRMC1	3	1	0	1	1	0.343119332594657	0	0.38923720162022	0.265661007206524	9.74016519359743e-18	0	4.89160526179848e-22	1.07361279772112e-12
PLD3	3	1	0	1	1	0.265429571834501	0	0.355376391260366	0.292265659789771	4.84703411521628e-14	0	8.52777239341951e-24	1.20073584319399e-22
PTPRZ1	3	1	1	0	1	0.307070205035915	0.499604648657745	0	0.28566187836503	8.61972642165325e-13	6.89502104711237e-44	0	2.65245893181624e-14
RPS2	3	1	1	0	1	0.259209287629148	0.578091269294789	0	0.417628380105427	7.78642181207169e-10	4.09106415805616e-88	0	3.30605574611806e-52
RTP5	3	1	1	0	1	0.264107547586059	0.326581252032548	0	0.25615136441767	2.00393651303503e-18	1.00900704262358e-31	0	1.23484891429762e-17
SNCA	3	1	0	1	1	0.296373966918915	0	0.428438859803628	0.33862866381304	2.87610427392508e-13	0	1.35624247141088e-28	8.07121867825798e-28
SNCG	3	1	1	1	0	0.603836382872692	0.543591678651974	0.278781822981517	0	2.60208013601162e-49	8.29920012419416e-57	2.91408476179292e-10	0
STMN3	3	1	0	1	1	0.337484043152187	0	0.361845257964551	0.256124861533128	4.0569309082282e-22	0	3.48305714790874e-24	7.45822762825918e-17
THY1	3	0	1	1	1	0	0.253827931037915	0.390147521967994	0.439786854929392	0	2.30832304030671e-26	9.16644751375283e-41	1.10050181586802e-64
TIMP2	3	1	1	0	1	0.313792118773861	0.435120299276884	0	0.289609233228561	1.0215447604862e-12	3.23514230212436e-35	0	7.39213051786405e-15
TMEM130	3	1	0	1	1	0.263340049905249	0	0.551861915829463	0.426497219787717	6.47801567698676e-11	0	4.4276848487592e-44	2.16503410050048e-43
TMEM132A	3	1	0	1	1	0.365810793376922	0	0.408306019109768	0.282659285378253	1.97753150496418e-17	0	9.67442642573946e-22	6.1703286893025e-15
TMEM59L	3	1	0	1	1	0.262975898603005	0	0.404050180387138	0.288820869436694	2.6274420830809e-17	0	2.28789047422894e-36	2.11823875064457e-24
TMSB4X	3	1	1	0	1	0.284394614518483	0.447641357542313	0	0.337424573507244	8.11892731460047e-33	2.82691089435377e-107	0	3.64264414970218e-73
TSPAN3	3	1	1	0	1	0.327311296673321	0.394350705344196	0	0.255667317810245	1.86172165862917e-18	3.34700816766957e-42	0	1.19061511529361e-18
TTC9B	3	1	1	1	0	0.378748671074975	0.291873263205457	0.288600767968853	0	7.29301441750453e-17	3.13568234178735e-15	1.01682334105478e-09	0
TUBA1A	3	0	1	1	1	0	0.491909810351011	0.416609847967593	0.783214058931165	0	6.04250897163086e-92	2.85477005926185e-38	7.74584595335928e-149
TXN	3	0	1	1	1	0	0.251204861019494	0.255218141761379	0.2730353124681	0	3.61342866044116e-10	6.30441094433785e-09	1.48078007423597e-13
YWHAH	3	1	0	1	1	0.294141641817505	0	0.680630143899707	0.585311385417506	3.26863803305522e-33	0	1.74682573531073e-94	1.45709860270193e-105
YWHAZ	3	1	0	1	1	0.42298513248261	0	0.641433060558946	0.450446702683845	2.50111329690632e-46	0	3.08074439356244e-76	6.54435185488293e-66
ZBTB18	3	1	1	1	0	0.357291783682769	0.268450580016063	0.323098648405128	0	1.84727241932086e-15	5.48802392639407e-12	3.98849821133354e-13	0
ABCA2	2	1	0	1	0	0.336743115455381	0	0.343457360206778	0	2.0021083656902e-14	0	3.32376693279902e-15	0
ACOT7	2	0	0	1	1	0	0	0.289809938618818	0.385358544810125	0	0	2.73125974111573e-11	3.48297406455531e-30
ADD3	2	1	1	0	0	0.333639781732663	0.326131425788485	0	0	6.58488894718993e-13	1.30529807721531e-19	0	0
AGAP2	2	1	1	0	0	0.284711633733583	0.250831770749571	0	0	4.90262249475486e-11	2.15605745019268e-10	0	0
AIF1	2	0	1	0	1	0	0.445102692928149	0	0.456495053522947	0	1.19313326811572e-39	0	3.61369747776379e-44
ANK2	2	1	1	0	0	0.29988144894465	0.283001747086636	0	0	1.89620486162581e-15	1.29715204176882e-17	0	0
ANXA11	2	0	1	0	1	0	0.254040560760968	0	0.263501603532892	0	2.37674590822442e-09	0	1.97541858171225e-11
APLNR	2	0	1	0	1	0	0.463844984708167	0	0.57349831527424	0	4.95106727020774e-48	0	3.03763797539504e-87
APOD	2	1	1	0	0	0.427796514098911	0.744955320933439	0	0	1.71646214797285e-21	1.22779942366807e-87	0	0
APOE	2	1	1	0	0	0.767825412231652	0.66829075820436	0	0	1.58734423078887e-96	8.87495823448792e-122	0	0
ARF1	2	1	0	1	0	0.273020942292132	0	0.337971593310435	0	2.50131673073503e-14	0	3.45739484791198e-21	0
ARL6IP1	2	1	1	0	0	0.356804292259612	0.254414948778771	0	0	7.71626636690164e-23	7.20513902984438e-17	0	0
ARPC5	2	1	1	0	0	0.256302044131856	0.285502173940353	0	0	5.84423852931727e-09	6.39017342554879e-17	0	0
ARPP19	2	0	0	1	1	0	0	0.285983798621589	0.279614962538783	0	0	5.80564852979393e-21	1.18193676047086e-27
ATP1A2	2	1	1	0	0	0.577875426922209	0.516469400354549	0	0	1.49628561791273e-52	3.88047246578365e-62	0	0
ATP2A2	2	0	0	1	1	0	0	0.30301338319857	0.372699751660296	0	0	2.71234709656907e-15	2.2241415567854e-34
ATP5IF1	2	0	0	1	1	0	0	0.309241686231236	0.263717567069576	0	0	4.49079677791975e-13	2.31765568165678e-14
ATP6V0C	2	0	0	1	1	0	0	0.328273890886315	0.327758643076085	0	0	5.19128683375118e-29	1.99785573250446e-44
AUXG01000058.1	2	1	0	1	0	0.445174873643479	0	0.257816580407336	0	9.86280982374248e-29	0	2.71392950070238e-09	0
B2M	2	1	1	0	0	0.280309522162339	0.63723580562782	0	0	9.77156579227842e-10	1.97699811324676e-79	0	0
BAALC	2	0	1	0	1	0	0.346683660174008	0	0.277119679206336	0	7.57255077951342e-30	0	6.25704838217373e-19
BCAP31	2	0	1	0	1	0	0.261306915089927	0	0.25043035591333	0	3.30150804926677e-13	0	1.64897458664732e-13
BIN1	2	1	0	1	0	0.305723971415518	0	0.305181636216293	0	7.80928950214904e-12	0	1.12672204280101e-11	0
BSG	2	1	1	0	0	0.278450715533263	0.460994990562679	0	0	2.65716828540251e-17	1.15643130919561e-67	0	0
BST2	2	0	1	0	1	0	0.301498434062264	0	0.273218782902914	0	3.21572425562192e-19	0	4.80813922004884e-16
C1orf115	2	1	1	0	0	0.292617106237547	0.263009371478719	0	0	8.2636199863298e-10	7.92578121366609e-10	0	0
C1orf61	2	1	1	0	0	0.428331052957341	0.370228888447657	0	0	9.16239380033608e-38	7.24951244951887e-41	0	0
C1QA	2	0	1	0	1	0	0.882102166889908	0	0.83388041853774	0	1.56264001756384e-112	0	3.16239574336982e-104
C1QB	2	0	1	0	1	0	1.08729902978742	0	1.07578260783955	0	2.03330495911594e-144	0	1.20931673719722e-142
C1QC	2	0	1	0	1	0	0.703050785696638	0	0.686848392933981	0	2.74962824765298e-73	0	9.1241657194259e-72
C1R	2	0	1	0	1	0	0.398916053018751	0	0.446681297454806	0	1.25538103769895e-31	0	1.51541841444715e-45
C1S	2	0	1	0	1	0	0.309585220226914	0	0.342810295820928	0	8.64948975869012e-20	0	5.90860470636215e-29
CA2	2	1	0	1	0	0.271943122228466	0	0.251792725551773	0	7.79669251289777e-13	0	4.98412570140942e-11	0
CACNA1E	2	0	0	1	1	0	0	0.303693634057522	0.289279783657635	0	0	4.09853693107836e-17	1.54875990725365e-16
CACYBP	2	0	1	0	1	0	0.331778312053283	0	0.335456396592127	0	3.74772690553776e-21	0	2.45815481439255e-22
CALM1	2	0	0	1	1	0	0	0.262796323234204	0.274791820090282	0	0	1.75494244275712e-41	1.28402332692092e-63
CALM3	2	0	0	1	1	0	0	0.356187938848021	0.385299347671744	0	0	5.78923345105695e-51	3.93557182956691e-77
CALR	2	0	1	0	1	0	0.606258250559981	0	0.582604833320912	0	2.05009612391822e-79	0	8.43016373992732e-73
CAP2	2	0	1	0	1	0	0.2682028852648	0	0.266303518091259	0	4.90519196054203e-15	0	2.89362662405808e-15
CCDC92	2	1	1	0	0	0.295595274534333	0.32437000818625	0	0	6.64507959815596e-13	1.89578416118886e-20	0	0
CD163	2	0	1	0	1	0	0.255562462076992	0	0.331226317108046	0	9.82446705692319e-15	0	6.25280157648312e-37
CD44	2	0	1	0	1	0	0.326474420132441	0	0.465131751255538	0	8.90208922532244e-27	0	6.32627588487311e-74
CDIP1	2	1	1	0	0	0.300901461173719	0.258490526675613	0	0	5.04743790403263e-13	2.75976505527403e-17	0	0
CDK17	2	1	0	1	0	0.269540761689005	0	0.252736659461519	0	1.07929356530803e-09	0	1.33930071636797e-09	0
CERCAM	2	1	0	1	0	0.338581829567757	0	0.339011244496524	0	8.59965441038744e-23	0	9.21876753324581e-25	0
CHI3L1	2	0	1	0	1	0	1.33695613751391	0	1.52017686410375	0	7.01774213808552e-168	0	2.63985431849852e-188
CHI3L2	2	0	1	0	1	0	0.401629797958305	0	0.421585298162236	0	1.65718254197277e-56	0	3.69934667979842e-67
CLCN3	2	1	0	1	0	0.279100089672052	0	0.263965545834465	0	6.70403720323972e-12	0	2.12047294821349e-11	0
CLDN11	2	1	0	1	0	0.303134641863661	0	0.392274479922215	0	7.47455675674147e-15	0	2.65719805365602e-33	0
CLDND1	2	1	0	1	0	0.289682473198864	0	0.264032321568188	0	4.08994007515292e-08	0	3.64976444302043e-07	0
CLSTN1	2	0	0	1	1	0	0	0.302792071456885	0.3425237507403	0	0	3.31094924185621e-26	2.32399240297188e-39
CLSTN2	2	1	0	1	0	0.396601627367773	0	0.322629102529015	0	5.99613248688573e-29	0	7.85821101484286e-19	0
CLU	2	1	1	0	0	0.324733239562734	0.519834714359207	0	0	1.22218296227378e-64	2.10379834731547e-155	0	0
CNP	2	1	0	1	0	0.506360447490329	0	0.360055228847556	0	3.86046170733727e-27	0	3.89086968178262e-13	0
CNTN1	2	1	0	1	0	0.364738626607231	0	0.315081046639895	0	6.0089378312138e-19	0	4.74571910968123e-14	0
COG1	2	1	0	1	0	0.257636440962044	0	0.2505962557229	0	3.94822643531481e-11	0	4.34450223258273e-11	0
CORO1A	2	0	1	0	1	0	0.306214598786749	0	0.329003886077769	0	9.53882474692713e-13	0	1.88394396563703e-18
CPE	2	1	1	0	0	0.4426502359654	0.284228703018375	0	0	7.43942332915849e-56	4.30590034276734e-35	0	0
CPNE6	2	1	1	0	0	0.475595517085882	0.498667271875565	0	0	3.26933812197108e-34	7.06785867619427e-49	0	0
CRELD1	2	0	1	0	1	0	0.279021081311941	0	0.33676638712106	0	1.65878620731424e-12	0	1.20488465655119e-21
CTSB	2	0	1	0	1	0	0.558463798852019	0	0.438473792292143	0	5.89470988619103e-76	0	3.07620476996585e-52
CTSD	2	1	1	0	0	0.376458683049083	0.419557781774658	0	0	7.4161212435594e-22	1.78699040095466e-42	0	0
CYBA	2	0	1	0	1	0	0.327959752748632	0	0.293674971455914	0	3.48283581360651e-19	0	1.22371862171126e-15
DBI	2	1	1	0	0	0.500004202381678	0.729048113087732	0	0	6.02582102799115e-32	4.1344373362233e-94	0	0
DDIT4	2	1	1	0	0	0.298131367172147	0.422710097457708	0	0	7.25304216799438e-14	2.3929964709567e-39	0	0
DDX6	2	1	1	0	0	0.252627646883168	0.251149970084718	0	0	2.47162065180089e-08	7.38718654080449e-13	0	0
DKK3	2	1	1	0	0	0.327473816924089	0.343176469008653	0	0	3.07473069630771e-39	1.07361744030083e-63	0	0
DLG4	2	1	1	0	0	0.285156915653263	0.252886063474952	0	0	5.40479206722631e-14	9.37391038448953e-12	0	0
DNAJA1	2	0	1	0	1	0	0.32409742828352	0	0.376107162154977	0	1.42532328311528e-23	0	4.17960343585491e-31
DNAJA4	2	0	1	0	1	0	0.349141887534737	0	0.404933025680451	0	5.80164254407959e-25	0	5.15810173370924e-35
DNAJB1	2	0	1	0	1	0	0.314721498626378	0	0.42185986383083	0	4.38849973895279e-20	0	3.42061228964652e-38
DNAJC12	2	1	0	1	0	0.290743629492982	0	0.366970347799832	0	1.74078323937556e-13	0	1.59407817417455e-25	0
DTNA	2	0	1	0	1	0	0.656720740740799	0	0.403656596802669	0	6.59163991632394e-76	0	9.6037134119798e-32
EDIL3	2	0	0	1	1	0	0	0.278203328497237	0.347715170628868	0	0	1.39293465124278e-08	3.05606614203811e-24
EDNRB	2	1	0	1	0	0.337489156386589	0	0.362405618647718	0	1.60989540063706e-19	0	1.60991960849827e-24	0
ELK1	2	0	0	1	1	0	0	0.270638510967051	0.271403897580732	0	0	2.67735522044955e-10	2.81048627312008e-15
ENC1	2	0	0	1	1	0	0	0.325006128675408	0.395310435996416	0	0	9.47912682805106e-27	7.63394526722808e-45
ENO1	2	1	1	0	0	0.261436315345276	0.368368813180314	0	0	1.70437574461491e-17	5.5929616618357e-50	0	0
ERBIN	2	1	0	1	0	0.329863904001164	0	0.300613812990204	0	5.56820498158566e-15	0	1.07806539700251e-12	0
ERMN	2	1	0	1	0	0.282622454191013	0	0.312251804727424	0	1.9137050175129e-17	0	2.27006361566935e-25	0
FABP3	2	0	0	1	1	0	0	0.404366810359102	0.393513312131707	0	0	1.76654186505977e-29	3.84845607202317e-37
FABP7	2	1	1	0	0	0.39886821052851	0.415475430743501	0	0	2.68978608184559e-23	4.73277582146069e-34	0	0
FAIM2	2	1	1	0	0	0.404001863898873	0.341636667872118	0	0	5.75357054890563e-38	1.14149707302509e-40	0	0
FAM107A	2	1	1	0	0	0.607462597883329	0.601652334266562	0	0	4.87859008660813e-84	7.46985152336188e-119	0	0
FAM171A1	2	1	0	1	0	0.352751289882017	0	0.267823263802178	0	3.1228172501317e-15	0	2.46657929708604e-08	0
FCER1G	2	0	1	0	1	0	0.371328231549583	0	0.442789495203709	0	5.35237368673577e-28	0	4.38389862454218e-45
FCGBP	2	0	1	0	1	0	0.416765768824823	0	0.519148168552933	0	5.140934472148e-40	0	9.4615507490369e-77
FCGR3A	2	0	1	0	1	0	0.272834231507201	0	0.407390575477971	0	1.1580174193238e-13	0	1.96112903114922e-39
FKBP1A	2	1	1	0	0	0.275053685445797	0.29613400876448	0	0	3.18687859606255e-13	9.35200106568052e-18	0	0
FTL	2	0	1	0	1	0	0.866611626699905	0	0.612895507303532	0	5.64053358095591e-192	0	3.10153298434238e-170
FXYD1	2	1	1	0	0	0.267068958109384	0.299404159169439	0	0	2.56656658967548e-08	3.34416146911489e-16	0	0
FXYD6	2	0	0	1	1	0	0	0.503420924994231	0.383688609754937	0	0	1.30087375109306e-44	1.75420315935296e-37
GAP43	2	1	0	1	0	0.304496461275381	0	0.279650809329603	0	4.08498082462935e-14	0	6.16259024374463e-12	0
GAPDH	2	0	1	0	1	0	0.257552354526313	0	0.425931144511924	0	7.31964853777114e-67	0	3.02478194371306e-128
GATB	2	0	1	0	1	0	0.261935898994869	0	0.274619999956385	0	1.52032103183365e-12	0	3.2597813247346e-16
GJA1	2	1	1	0	0	0.781362942194348	0.733965239879945	0	0	5.24103103064062e-69	1.68793485962204e-91	0	0
GNAO1	2	1	1	0	0	0.342793633448959	0.309428432689611	0	0	6.65871821880534e-16	1.69462153237815e-21	0	0
GPM6A	2	1	0	1	0	0.298501465762978	0	0.268002545913727	0	3.21670602464047e-42	0	3.52156682475337e-32	0
GPM6B	2	1	1	0	0	0.54659686575276	0.399707330949677	0	0	3.5196537133474e-68	4.43384497402497e-58	0	0
GPRC5B	2	1	1	0	0	0.432515204920356	0.255268843313999	0	0	7.08820095875769e-22	1.87675996452258e-12	0	0
GRIA1	2	1	0	1	0	0.367188881989546	0	0.343191593601445	0	1.48207295419608e-20	0	1.44231032774507e-18	0
HHATL	2	1	0	1	0	0.303014896828331	0	0.270043073595024	0	1.63406537102171e-16	0	3.20057921487149e-13	0
HIPK2	2	1	1	0	0	0.389043527801678	0.280518928437141	0	0	8.23182602377198e-16	4.80763942806896e-15	0	0
HLA-C	2	1	0	1	0	0.431381823816777	0	0.364822786267048	0	2.45916836735672e-23	0	1.08041360351428e-16	0
HLA-DRA	2	1	1	0	0	0.275785023883079	0.319580358195052	0	0	2.18070452872069e-09	1.70101900408809e-17	0	0
HMGCS1	2	0	0	1	1	0	0	0.267509554269194	0.271770753231366	0	0	2.28846505354363e-09	3.41195557168009e-17
HNRNPC	2	0	1	0	1	0	0.282925651819576	0	0.256756084191434	0	3.23075057282333e-16	0	1.86474476501707e-13
HPCA	2	0	1	0	1	0	0.353873394320555	0	0.361190682251938	0	5.76234970586046e-26	0	1.92987294805485e-27
HSP90AA1	2	0	1	0	1	0	0.710007006477209	0	0.664813021567001	0	3.72153500736067e-180	0	2.52698964341513e-167
HSP90B1	2	0	1	0	1	0	0.612400890377703	0	0.704293064873155	0	8.26972784499491e-89	0	8.71945468280143e-102
HSPA1A	2	0	1	0	1	0	0.714510819275225	0	0.851618987571996	0	1.14111070600084e-98	0	3.37728310825649e-119
HSPA5	2	0	1	0	1	0	0.442119836576592	0	0.666020207269049	0	4.59715205730137e-42	0	6.95284572340617e-84
HSPA8	2	0	1	0	1	0	0.290582177722931	0	0.367005757100739	0	4.02637690049832e-42	0	1.40025234847532e-61
HSPB1	2	0	1	0	1	0	0.996873745286963	0	1.07907790711099	0	8.30330895987871e-173	0	2.05618709719022e-177
HSPB8	2	0	0	1	1	0	0	0.284246298886825	0.391920263707002	0	0	9.30782430425198e-12	3.05400984759959e-32
HSPD1	2	0	1	0	1	0	0.364140652773072	0	0.379098332120798	0	5.95763379818374e-27	0	1.75878504547896e-30
HSPE1	2	0	1	0	1	0	0.48918580562683	0	0.378671865130737	0	1.33430092150261e-49	0	7.71690966139995e-31
ICAM5	2	0	0	1	1	0	0	0.367724780125317	0.295232714460141	0	0	3.39150152093004e-20	1.10049954725342e-17
ID4	2	1	1	0	0	0.437466539421993	0.40882545529426	0	0	1.40141295842073e-29	9.91827493133908e-31	0	0
IDS	2	1	1	0	0	0.357823062749589	0.339027599735307	0	0	5.99360469548754e-66	5.68921705420698e-74	0	0
ITGB2	2	0	1	0	1	0	0.304690665031207	0	0.263251830766915	0	5.62888680197745e-24	0	2.25106149712997e-16
ITGB4	2	0	1	0	1	0	0.366634674251356	0	0.378602597939114	0	3.0501269627214e-29	0	9.03965779633564e-34
ITM2B	2	1	1	0	0	0.274870387922856	0.299961876158476	0	0	2.73092917250657e-25	1.55039162701059e-40	0	0
ITM2C	2	1	1	0	0	0.316016240133649	0.45702879413423	0	0	1.57086369982489e-25	4.11741839615897e-78	0	0
JPH4	2	1	0	1	0	0.294268250390422	0	0.251785127277594	0	4.52936214440769e-13	0	1.37815006818755e-08	0
JPT1	2	0	0	1	1	0	0	0.306704838629452	0.335567958351782	0	0	4.34067816199267e-14	1.7002615149852e-23
JUN	2	0	0	1	1	0	0	0.300167685923339	0.371318562652499	0	0	1.14071987175692e-10	1.48959853031601e-26
KIAA0930	2	1	1	0	0	0.279563981594712	0.356136570197636	0	0	7.94288174125928e-09	4.52918656423205e-26	0	0
KIF1A	2	1	1	0	0	0.349704371385137	0.291174391015138	0	0	9.50863176152871e-30	1.03627910493534e-28	0	0
KIF21B	2	1	0	1	0	0.286804515902764	0	0.254345652184189	0	5.22393228140614e-16	0	1.67882027297617e-12	0
KLK7	2	1	0	1	0	0.269074119081176	0	0.278677509358699	0	7.93541545664067e-28	0	2.68635814613815e-32	0
LAMP5	2	0	0	1	1	0	0	0.54431013227166	0.74286294113828	0	0	1.49837659972269e-33	3.47347059085689e-81
LARGE1	2	1	0	1	0	0.344304588155958	0	0.380230636929623	0	4.09109304565223e-22	0	8.03635610676777e-30	0
LDHA	2	0	1	0	1	0	0.452225299014029	0	0.530108242161476	0	7.20140978647575e-48	0	5.45872745873606e-62
LY6H	2	1	0	1	0	0.439195159556103	0	0.482486665447524	0	7.86421536951584e-42	0	1.58953127383551e-46	0
MAG	2	1	0	1	0	0.252726496695081	0	0.301592184853952	0	8.18021692336269e-12	0	1.57217658231527e-22	0
MAL2	2	0	0	1	1	0	0	0.260754822059993	0.260840704781056	0	0	1.14490499278876e-10	2.10653661334106e-14
MAOB	2	0	1	0	1	0	0.360823900147078	0	0.357445898961714	0	4.91641500445125e-25	0	1.22616058646215e-27
MAP2K1	2	0	0	1	1	0	0	0.311841493880494	0.370578898563869	0	0	1.81774432357342e-13	2.94396348073271e-25
MAPK8IP1	2	1	1	0	0	0.396446181639899	0.262640631455517	0	0	8.2938639600209e-24	1.88428107421902e-14	0	0
MEIS3	2	0	0	1	1	0	0	0.289101519106007	0.25011571554084	0	0	5.54531295938053e-15	4.68068605054686e-14
METRN	2	1	1	0	0	0.425685224610786	0.375222619070061	0	0	1.49076681587431e-22	2.57900529718784e-23	0	0
MGST1	2	0	1	0	1	0	0.790977762232901	0	0.527522162164309	0	1.9170151811559e-100	0	4.99455135245179e-54
MIF	2	0	0	1	1	0	0	0.332334773328873	0.317370285364302	0	0	4.92275141104782e-30	1.16639808790458e-41
MOBP	2	1	0	1	0	0.312555889841378	0	0.352355282794216	0	3.26812611998853e-11	0	2.13431306232866e-17	0
MRVI1	2	0	1	0	1	0	0.257674580206749	0	0.273155732609967	0	8.03387252983464e-14	0	7.82607378126021e-19
MT-ATP6	2	1	1	0	0	0.707232095507005	0.736585327563579	0	0	8.05622285616955e-128	8.41486347852346e-193	0	0
MT-ATP8	2	1	1	0	0	0.643376836897064	0.801043643713543	0	0	5.2193542673376e-59	8.80763714055925e-114	0	0
MT-CO1	2	1	1	0	0	0.464926184184179	0.467660471685909	0	0	1.79435948819525e-114	1.24484856405934e-150	0	0
MT-CO2	2	1	1	0	0	0.512705532846899	0.526779951162009	0	0	4.23364899892781e-124	8.97108285764187e-181	0	0
MT-CO3	2	1	1	0	0	0.747771844548631	0.634864855200905	0	0	7.66783547988537e-129	4.32729288000331e-190	0	0
MT-CYB	2	1	1	0	0	0.822563281424447	0.90149608698405	0	0	3.54371619803466e-129	2.82311529867748e-196	0	0
MT-ND1	2	1	1	0	0	0.439735765619054	0.549875341872289	0	0	3.42230401449276e-108	7.59320213716859e-172	0	0
MT-ND2	2	1	1	0	0	0.488630926616771	0.581293848158395	0	0	1.46793364824851e-105	1.75447982090635e-162	0	0
MT-ND4	2	1	1	0	0	0.623146453090028	0.781666104449452	0	0	1.74527511280001e-126	1.38739230587488e-195	0	0
MT-ND4L	2	1	1	0	0	0.748371798474418	1.02707427335838	0	0	9.77545786050751e-97	1.68118168585538e-174	0	0
MT-ND5	2	1	1	0	0	0.608544312533993	0.828973234603278	0	0	1.63871976555845e-105	3.20940634027579e-182	0	0
MT-ND6	2	1	1	0	0	0.306783726869921	0.261174707987012	0	0	1.18857375371536e-11	1.76752427369124e-09	0	0
MT3	2	1	1	0	0	0.270515722303546	0.418400983066053	0	0	2.07949715104764e-64	5.25111936865296e-158	0	0
MTCH1	2	0	0	1	1	0	0	0.317132005787481	0.369269951887351	0	0	1.54896478406337e-21	8.18284421479824e-39
MTPN	2	1	1	0	0	0.387592675171407	0.413386230237934	0	0	4.47520474778642e-23	1.32938349255608e-38	0	0
MTRNR2L6	2	1	0	1	0	0.624390947781155	0	0.367994176678671	0	4.14448127530595e-61	0	1.98470459307062e-19	0
MTURN	2	1	1	0	0	0.373787256249096	0.370411656295523	0	0	2.74664918414874e-26	3.52509064758766e-39	0	0
NAPB	2	0	0	1	1	0	0	0.389921690171381	0.322278448240379	0	0	1.3172123606523e-28	1.40978332679942e-29
NCAM1	2	1	0	1	0	0.341881719223206	0	0.286722532957081	0	1.12691049710439e-18	0	9.89859786854203e-13	0
NCAN	2	1	0	1	0	0.325560760863766	0	0.295404118545691	0	1.62216369653592e-11	0	8.14289533106579e-10	0
NDUFAF3	2	1	0	1	0	0.333186274406825	0	0.351009206403055	0	3.00369518288375e-13	0	4.15245284972478e-16	0
NDUFS5	2	0	0	1	1	0	0	0.281984051337143	0.316263088994643	0	0	1.01764934745716e-13	8.73867838290918e-31
NEUROD2	2	1	1	0	0	0.370990628040931	0.260537581258738	0	0	2.43493155556793e-22	9.25286167511861e-13	0	0
NOMO1	2	1	0	1	0	0.309979474316198	0	0.367182921537147	0	5.18926658943473e-17	0	2.32600390947541e-26	0
NPTN	2	0	0	1	1	0	0	0.284375809107886	0.3050211238117	0	0	9.27487609632525e-12	1.15054204264869e-21
NPY	2	1	0	1	0	0.487914448841674	0	0.504193100205861	0	9.72222472115396e-31	0	4.60982431048342e-33	0
NRXN2	2	1	1	0	0	0.395373670886766	0.300584896295064	0	0	4.23240489047651e-24	1.50563114257134e-15	0	0
NSMF	2	1	0	1	0	0.482748655527123	0	0.266814681533228	0	3.37694536959753e-37	0	6.71139791019978e-12	0
NUDT4	2	0	0	1	1	0	0	0.282106248441224	0.289831243165569	0	0	4.57479518025295e-10	1.7568073484956e-13
NUPR1	2	0	1	0	1	0	0.845005601219224	0	0.835877620491909	0	5.20059511622256e-106	0	3.53925385961763e-105
OAZ1	2	0	0	1	1	0	0	0.29967246579122	0.327272455511252	0	0	3.66805849628786e-22	4.66298346722245e-38
PALM	2	1	1	0	0	0.257655941575704	0.348032016776187	0	0	6.59726371228376e-08	2.56205750100778e-26	0	0
PCBP2	2	1	1	0	0	0.265569448387744	0.277148662041201	0	0	3.13687083230744e-09	5.34316137752689e-16	0	0
PCSK1N	2	0	0	1	1	0	0	0.408905524351232	0.275975547699878	0	0	1.48863674382049e-39	3.56701211339511e-30
PDCD5	2	1	1	0	0	0.268512253326374	0.290584353696418	0	0	2.69911116131915e-11	3.03479073265346e-15	0	0
PDE4DIP	2	1	0	1	0	0.297706184185209	0	0.304756953202693	0	5.32051853121515e-11	0	7.93097264611363e-12	0
PDIA3	2	0	1	0	1	0	0.28108038132959	0	0.260058323129229	0	3.87823482100979e-14	0	1.33173566636887e-14
PDIA6	2	0	1	0	1	0	0.429432820775022	0	0.38472431714539	0	7.67516498131174e-38	0	1.64866334580769e-31
PDYN	2	1	0	1	0	0.32238397877764	0	0.332860186030305	0	5.37489246676687e-37	0	7.04961991617751e-43	0
PDZD4	2	1	1	0	0	0.255726862795997	0.316101369786258	0	0	3.56621478892094e-08	2.46504521614984e-23	0	0
PFN1	2	0	1	0	1	0	0.335427031404555	0	0.282196644272388	0	5.46227256332773e-17	0	2.31733603288199e-12
PGM2L1	2	1	0	1	0	0.382925331289742	0	0.460928652621368	0	4.57376863516009e-21	0	8.71819896691474e-30	0
PI4KA	2	0	0	1	1	0	0	0.367579002976669	0.31695901213016	0	0	1.3603053662244e-16	7.81395063792719e-21
PIP4K2A	2	1	0	1	0	0.304941071410924	0	0.295868971056363	0	2.30975142981723e-10	0	2.06077073121797e-10	0
PKM	2	0	1	0	1	0	0.303907311669851	0	0.273708364682448	0	1.00594847321407e-37	0	5.52380727070422e-32
PLAAT4	2	0	1	0	1	0	0.402397563230472	0	0.377576531609844	0	1.01724364920008e-38	0	7.14203601265138e-37
PLEKHA2	2	1	1	0	0	0.279071824246402	0.257464476661468	0	0	2.18950190117155e-12	3.01278562848211e-11	0	0
PLEKHB1	2	1	1	0	0	0.44845889718692	0.379344096946852	0	0	1.73165606931989e-22	1.22315138216045e-30	0	0
PLEKHH1	2	1	0	1	0	0.287217386706995	0	0.252260949884937	0	1.81372749893186e-17	0	1.34387961990898e-13	0
PLPP3	2	1	1	0	0	0.293942435654433	0.307955372365203	0	0	1.41606488424882e-08	4.72806735982405e-15	0	0
PLPPR2	2	1	1	0	0	0.350813893743421	0.293443122240577	0	0	3.46431226067204e-16	2.06023669119276e-14	0	0
POLR2L	2	0	1	0	1	0	0.417446198338167	0	0.267833740272026	0	1.03560882337854e-38	0	1.59253810442107e-15
PPDPF	2	0	1	0	1	0	0.435824396604248	0	0.399977960996538	0	6.66091225159635e-49	0	9.44353366991791e-40
PPFIA2	2	0	0	1	1	0	0	0.423961815580584	0.310731500976126	0	0	1.99238945898634e-25	1.0618443682554e-15
PPIA	2	0	0	1	1	0	0	0.283600176490182	0.259737895750099	0	0	5.98991744480688e-28	4.08532697032448e-34
PPP2CB	2	1	1	0	0	0.29551888507579	0.27055909276839	0	0	1.54855100683714e-11	6.89045587636301e-13	0	0
PPP3CB	2	1	1	0	0	0.278460694943924	0.282426693675172	0	0	5.34188805815688e-10	2.06220785839723e-18	0	0
PRDX1	2	1	1	0	0	0.34061772149964	0.397531455698971	0	0	8.03468080584391e-17	6.29061270630978e-37	0	0
PRRT1	2	0	0	1	1	0	0	0.355172314054197	0.310455915296429	0	0	6.03633151061946e-18	5.38746399804744e-20
PSD2	2	1	0	1	0	0.3358514524449	0	0.367257053269269	0	5.62988861984702e-19	0	2.8447277117905e-26	0
PSD3	2	0	0	1	1	0	0	0.295493787463651	0.333457937216961	0	0	7.73888235748102e-13	3.83065402319916e-25
PTGES3	2	0	1	0	1	0	0.428685681134824	0	0.297545899997136	0	7.78994230461605e-42	0	4.08615792385259e-20
PTK2	2	1	0	1	0	0.296497002199437	0	0.26670152565334	0	5.66378414396713e-10	0	2.28184844412172e-08	0
QDPR	2	1	0	1	0	0.402754157759526	0	0.337183600691759	0	1.3408396869644e-19	0	3.28292792625793e-13	0
QKI	2	1	1	0	0	0.434789284086541	0.365568659070484	0	0	2.05474749886181e-24	4.22575866693869e-28	0	0
RAB3C	2	1	0	1	0	0.254783065697818	0	0.315809725801086	0	1.3092483872222e-05	0	3.61489871085373e-12	0
RGS14	2	0	0	1	1	0	0	0.267893747112824	0.293809226675287	0	0	6.40378745655711e-13	1.21675840477748e-21
RHBDD2	2	0	0	1	1	0	0	0.324600806980491	0.307388845670524	0	0	3.68129691470635e-20	8.28232885016577e-24
RPL11	2	1	1	0	0	0.27187334727517	0.363739801537849	0	0	8.99391403774e-10	1.07844923826943e-32	0	0
RPLP0	2	0	1	0	1	0	0.542362800565479	0	0.398595048022734	0	1.30064547728945e-62	0	1.74045104130119e-35
RPS19	2	0	1	0	1	0	0.509000558347506	0	0.388682356853594	0	3.91498522301194e-84	0	1.188354936524e-53
RPS6	2	1	1	0	0	0.251051901112412	0.371329980492042	0	0	3.88072120601002e-10	1.47739153610588e-39	0	0
RPSA	2	0	1	0	1	0	0.372336324522784	0	0.289461600429647	0	1.09033147038126e-42	0	3.82083222873735e-27
RTN1	2	0	0	1	1	0	0	0.328613290935882	0.309900181337984	0	0	2.5528474644831e-34	1.41074468039854e-42
RTN3	2	0	0	1	1	0	0	0.455625216477135	0.418533869293391	0	0	3.87553929407583e-48	4.37193989112152e-61
RTN4	2	0	0	1	1	0	0	0.341616235375775	0.368981028716574	0	0	3.31096889317536e-30	6.56752149784493e-54
RTN4R	2	0	0	1	1	0	0	0.274343032671062	0.272513205993985	0	0	3.97258301900937e-10	8.38536656654604e-15
S100A10	2	0	1	0	1	0	0.464661624293157	0	0.425640731302395	0	3.85251301987298e-34	0	9.11897142162639e-28
S100A11	2	0	1	0	1	0	0.408368980187051	0	0.362866437764068	0	1.0562836702383e-31	0	4.75167037831638e-26
SCD5	2	1	1	0	0	0.517682532649278	0.491655434605662	0	0	6.09983212943747e-38	2.23793426581854e-54	0	0
SCOC	2	1	1	0	0	0.253144860406902	0.251683154477586	0	0	3.8281505346536e-07	6.00969329497946e-09	0	0
SEC11C	2	0	1	0	1	0	0.435172035613006	0	0.338049968614134	0	2.50833308106212e-34	0	5.99742419537856e-21
SELENOW	2	0	0	1	1	0	0	0.262064221223714	0.297889103891968	0	0	1.08348680778961e-19	3.48844404506634e-38
SEMA3D	2	0	1	0	1	0	0.266675606667696	0	0.286804498901807	0	2.32978236982375e-27	0	6.11088449198469e-36
SEPTIN3	2	1	1	0	0	0.304088438742279	0.271409339977362	0	0	3.0971269812201e-18	5.32517319583872e-21	0	0
SERF2	2	0	1	0	1	0	0.474042079584774	0	0.393883277138405	0	3.11301752344499e-64	0	7.06549207063907e-45
SH3BGRL3	2	1	1	0	0	0.506722262307474	0.490425234717011	0	0	4.34825258969474e-35	6.64167226279075e-48	0	0
SH3GL2	2	0	0	1	1	0	0	0.408429327936881	0.41925441567374	0	0	5.158854545605e-22	2.84401486304169e-33
SLC30A3	2	0	1	0	1	0	0.31303323631073	0	0.341403933439945	0	2.01951565834994e-21	0	1.12780836089381e-27
SLC8A2	2	1	1	0	0	0.313581005256623	0.274978676103547	0	0	4.33658898040934e-16	1.00857803803061e-11	0	0
SLC9A6	2	1	0	1	0	0.280211808715773	0	0.290615799052533	0	6.73856822770526e-11	0	1.58947153992536e-12	0
SLIT1	2	1	0	1	0	0.289235935251667	0	0.276954000211782	0	3.03272980871076e-09	0	3.99230118554423e-09	0
SMIM29	2	0	1	0	1	0	0.381131177160395	0	0.312580227277649	0	1.58034316642008e-27	0	1.7477797290281e-18
SNX3	2	0	1	0	1	0	0.394112849509006	0	0.357726626984893	0	6.54511892493668e-40	0	3.24367790694044e-32
SOD1	2	0	1	0	1	0	0.27837227833064	0	0.305933586504297	0	1.29360593095857e-29	0	1.67015637203442e-35
SOD2	2	0	1	0	1	0	0.753725286886639	0	0.660925515563464	0	1.39064412854318e-110	0	9.33129971416919e-90
SORBS2	2	0	0	1	1	0	0	0.318453731118535	0.303200884109318	0	0	5.79790079120267e-18	1.81824277505009e-20
SOWAHA	2	0	1	0	1	0	0.2787089932076	0	0.310365923987634	0	2.13911966954995e-15	0	3.00455882892497e-21
SPARC	2	0	1	0	1	0	0.37290609264258	0	0.490668124788288	0	1.49308371350551e-20	0	1.08583141464351e-37
SPOCK1	2	1	1	0	0	0.553926475488132	0.301031830515845	0	0	2.54826268585214e-41	2.686568352926e-15	0	0
SPOCK2	2	1	1	0	0	0.351118924575688	0.356588400380224	0	0	2.30990380964804e-19	6.46556403234041e-29	0	0
SPP1	2	0	1	0	1	0	1.19029566103645	0	1.19061839927422	0	2.54385544744353e-145	0	1.147154656418e-147
SPRED1	2	0	1	0	1	0	0.283914805713645	0	0.258774795583274	0	1.80022970731141e-16	0	3.62742476270436e-16
STMN1	2	0	0	1	1	0	0	0.391766263750002	0.370304793402933	0	0	4.97909206839975e-42	6.49601879182706e-48
STMN2	2	1	0	1	0	0.43176920259418	0	0.388840222138529	0	7.15866920006912e-30	0	1.80570682257011e-24	0
STMN4	2	0	0	1	1	0	0	0.431663430369648	0.3809862296487	0	0	3.94897564535179e-26	2.12869613265066e-27
STX1A	2	1	1	0	0	0.336975960591134	0.311986228910961	0	0	1.6015998798595e-14	3.88804384823037e-17	0	0
STXBP1	2	0	0	1	1	0	0	0.323614081677844	0.257022824167811	0	0	2.6753221682176e-27	4.10866093655694e-21
SUB1	2	1	0	1	0	0.265776281765158	0	0.308877585003865	0	1.06600883774093e-09	0	4.88488996827935e-14	0
SUN2	2	1	1	0	0	0.256425657612782	0.295870424277537	0	0	5.69516015974404e-07	5.0864694951464e-14	0	0
SYNPO	2	1	1	0	0	0.405918743830492	0.393515803753345	0	0	2.47650756552355e-25	3.58854669000741e-31	0	0
SYP	2	1	1	0	0	0.405455386203254	0.395399560384037	0	0	2.02348986513854e-39	8.02704011063944e-50	0	0
SYT1	2	1	0	1	0	0.308896902956336	0	0.37884316553993	0	5.6379531287309e-31	0	6.31378359186909e-43	0
SYT7	2	1	0	1	0	0.253354755809797	0	0.264528767477064	0	1.06321906346765e-07	0	1.48739307519807e-09	0
TAGLN3	2	1	0	1	0	0.421640482032901	0	0.289620325862132	0	3.29902380741648e-29	0	5.88221001607238e-13	0
TF	2	1	0	1	0	0.452806232714645	0	0.421213465076304	0	7.39539506353517e-29	0	1.76364761951439e-24	0
TIMP1	2	0	1	0	1	0	0.269501552262038	0	0.284295017326098	0	1.3781286483963e-15	0	1.22240122263574e-18
TMBIM1	2	0	1	0	1	0	0.502692858731853	0	0.418505738488942	0	1.13461892239994e-47	0	8.86911720498489e-34
TMEM158	2	1	0	1	0	0.301888141076164	0	0.301051786459114	0	1.68514307004356e-12	0	4.41756584721655e-14	0
TMEM30A	2	1	1	0	0	0.281125686534426	0.262243071474631	0	0	5.64065981435578e-10	3.68723394918891e-13	0	0
TMEM47	2	1	0	1	0	0.288174029273395	0	0.300932960930497	0	2.38944973697008e-10	0	4.95026712545518e-12	0
TMSB10	2	0	0	1	1	0	0	0.360666751310269	0.413186957900803	0	0	1.01789295983917e-63	2.06049120711524e-99
TPI1	2	0	1	0	1	0	0.267172899401512	0	0.398203730039446	0	1.18065445546344e-33	0	2.38352065061834e-62
TPPP	2	1	1	0	0	0.305732488613871	0.258924319014388	0	0	3.16981870149707e-12	4.01795545926303e-13	0	0
TRIL	2	1	0	1	0	0.398371809426234	0	0.47579285025022	0	1.28237581402965e-20	0	3.05099193979828e-33	0
TSC22D4	2	1	1	0	0	0.466608918186697	0.587970754558466	0	0	2.99172993865317e-27	1.82852190211787e-62	0	0
TUBA1B	2	0	0	1	1	0	0	0.547562149124419	0.278187060524149	0	0	2.21493516002161e-85	1.00701898599519e-47
TUBB	2	1	0	1	0	0.39913854227996	0	0.474907316830265	0	4.13332027201694e-26	0	1.58991710220139e-33	0
TUBB2A	2	1	0	1	0	0.32365322380326	0	0.348217292810913	0	4.6127954756676e-28	0	1.09796077509877e-31	0
TYROBP	2	0	1	0	1	0	0.358780998517278	0	0.289540018853889	0	9.47280467133235e-29	0	1.41396452276365e-18
UBA52	2	1	1	0	0	0.257617139775296	0.37987555323868	0	0	1.14993531872992e-14	1.33298804874197e-47	0	0
UCHL1	2	0	0	1	1	0	0	0.35179429764561	0.277344436170849	0	0	2.61988881700312e-47	1.53298589017576e-38
UHMK1	2	1	1	0	0	0.299730874365461	0.265283742764554	0	0	3.23682517815461e-13	4.4968241344146e-15	0	0
VSIG4	2	0	1	0	1	0	0.43168855505371	0	0.503128109368749	0	6.50442354829919e-40	0	9.95689933745042e-63
XPO1	2	0	1	0	1	0	0.291030022702895	0	0.29595510125743	0	3.55232782325739e-15	0	1.62440185012191e-17
YWHAE	2	1	1	0	0	0.461535690423122	0.299071002911779	0	0	4.12443715769851e-57	9.25543673174224e-35	0	0
A2M	1	1	0	0	0	0.326122269072768	0	0	0	5.25141110619797e-11	0	0	0
AC104072.1	1	1	0	0	0	0.273690069336796	0	0	0	4.58455598033603e-12	0	0	0
ADCY1	1	1	0	0	0	0.299747194900775	0	0	0	7.22068292745422e-12	0	0	0
ADGRB2	1	0	0	1	0	0	0	0.28467153329891	0	0	0	9.43993556310196e-09	0
ADGRL1	1	1	0	0	0	0.268991993033289	0	0	0	1.21788215123446e-07	0	0	0
ADGRL3	1	0	0	1	0	0	0	0.272709563821398	0	0	0	5.93351048269791e-11	0
AGAP3	1	1	0	0	0	0.307271434297678	0	0	0	9.58046603583483e-13	0	0	0
AHCYL1	1	0	1	0	0	0	0.497977377311122	0	0	0	5.48666733504781e-49	0	0
AIFM3	1	1	0	0	0	0.271480762804899	0	0	0	5.95775483660413e-15	0	0	0
AK5	1	1	0	0	0	0.271010752596541	0	0	0	1.78979245736426e-08	0	0	0
AKAP5	1	0	0	1	0	0	0	0.254317518619005	0	0	0	4.78591373603919e-11	0
AL627171.2	1	1	0	0	0	0.375163908448891	0	0	0	2.40508512437656e-19	0	0	0
ALDH6A1	1	1	0	0	0	0.264588432423409	0	0	0	9.85161006278308e-08	0	0	0
AMER2	1	1	0	0	0	0.328304246809517	0	0	0	3.0069666551498e-15	0	0	0
ANLN	1	0	0	1	0	0	0	0.277552921970244	0	0	0	1.4795615866467e-26	0
ANO3	1	0	1	0	0	0	0.284719634730932	0	0	0	4.44766351664833e-20	0	0
ANXA5	1	0	1	0	0	0	0.263450486816013	0	0	0	1.31775339590488e-16	0	0
AP1M1	1	1	0	0	0	0.261436774634879	0	0	0	3.92314598046359e-07	0	0	0
AP1S1	1	0	0	1	0	0	0	0.310280328015584	0	0	0	1.96225281988669e-11	0
AP2M1	1	0	0	1	0	0	0	0.28127957790188	0	0	0	1.2804632336927e-15	0
APBA1	1	1	0	0	0	0.276310389248324	0	0	0	1.01388060466464e-12	0	0	0
APOC2	1	0	1	0	0	0	0.349025245654337	0	0	0	2.59367212402539e-25	0	0
APP	1	1	0	0	0	0.343505815700564	0	0	0	3.73965699454616e-31	0	0	0
AQP1	1	0	0	0	1	0	0	0	0.345629485504933	0	0	0	9.97075428031423e-41
ARFGEF3	1	0	0	1	0	0	0	0.265778782958646	0	0	0	6.38589942406397e-10	0
ARHGAP35	1	1	0	0	0	0.292685806644467	0	0	0	4.12409033477724e-11	0	0	0
ARHGDIG	1	1	0	0	0	0.386756321890686	0	0	0	2.48870795496604e-26	0	0	0
ARL6IP4	1	0	1	0	0	0	0.25521140011095	0	0	0	3.98643716560752e-13	0	0
ARL8A	1	1	0	0	0	0.259311375322565	0	0	0	4.37903121077691e-08	0	0	0
ARL8B	1	0	1	0	0	0	0.265190298193177	0	0	0	5.92436350792236e-11	0	0
ARPC4	1	1	0	0	0	0.259215731881241	0	0	0	1.88886178213499e-07	0	0	0
ASAH1	1	1	0	0	0	0.257666638109687	0	0	0	1.84776535660596e-07	0	0	0
ATP1A3	1	1	0	0	0	0.26355236957982	0	0	0	2.83242877904415e-13	0	0	0
ATP6AP1	1	0	0	0	1	0	0	0	0.259618844153135	0	0	0	1.85049218236466e-13
ATP6V0E1	1	0	1	0	0	0	0.25690832907746	0	0	0	4.73593762824728e-12	0	0
ATP6V1A	1	1	0	0	0	0.295965907853647	0	0	0	2.84717332042632e-12	0	0	0
ATP6V1B2	1	0	0	1	0	0	0	0.267721818766192	0	0	0	1.84176539982554e-11	0
ATP6V1G2	1	0	0	1	0	0	0	0.348269534051939	0	0	0	2.5555605464715e-17	0
ATP8A1	1	0	0	1	0	0	0	0.263435788813251	0	0	0	3.38984397250503e-08	0
ATP9A	1	1	0	0	0	0.271529455253875	0	0	0	1.20771442160368e-10	0	0	0
ATRN	1	0	0	1	0	0	0	0.253479547923349	0	0	0	6.4967714267407e-11	0
AZIN1	1	1	0	0	0	0.258488668571102	0	0	0	1.61354718228764e-07	0	0	0
BBS2	1	1	0	0	0	0.250478510324057	0	0	0	2.77435832410255e-09	0	0	0
BCAN	1	0	1	0	0	0	0.254406301938387	0	0	0	6.36407241648537e-10	0	0
BCAS1	1	1	0	0	0	0.367596094680127	0	0	0	1.19926079934533e-23	0	0	0
BCL11A	1	0	0	1	0	0	0	0.271356617383147	0	0	0	2.02627143654175e-09	0
BEX1	1	0	0	1	0	0	0	0.463224894755155	0	0	0	2.66656492609804e-38	0
BEX2	1	0	0	1	0	0	0	0.28701984070668	0	0	0	1.93194771075899e-13	0
BLCAP	1	1	0	0	0	0.27433220471411	0	0	0	3.77225904607907e-10	0	0	0
BLOC1S1	1	1	0	0	0	0.251181249239315	0	0	0	1.63128452148416e-06	0	0	0
BNIP3	1	0	1	0	0	0	0.256329219483718	0	0	0	5.48861346746987e-10	0	0
BRI3	1	0	1	0	0	0	0.270430186122571	0	0	0	2.86517468848572e-12	0	0
BRINP1	1	0	0	0	1	0	0	0	0.280078791232127	0	0	0	3.25713581660808e-17
BTBD2	1	0	1	0	0	0	0.26021398724785	0	0	0	5.91322900431868e-12	0	0
C19orf53	1	0	1	0	0	0	0.264379394407345	0	0	0	2.37963488551019e-11	0	0
C1QTNF4	1	0	0	0	1	0	0	0	0.320693960792267	0	0	0	8.57235172332769e-22
C7orf50	1	1	0	0	0	0.268055516800811	0	0	0	2.64167853018691e-11	0	0	0
C9orf16	1	1	0	0	0	0.277457480672297	0	0	0	5.56121519147761e-10	0	0	0
CADM1	1	1	0	0	0	0.279033197802734	0	0	0	9.97767578825472e-09	0	0	0
CADPS	1	1	0	0	0	0.266631372954269	0	0	0	8.14821178043208e-09	0	0	0
CALY	1	0	0	0	1	0	0	0	0.264828478806563	0	0	0	3.85023276482595e-18
CAMK2B	1	1	0	0	0	0.275691295341243	0	0	0	1.43065739551328e-13	0	0	0
CAMK2N1	1	0	0	0	1	0	0	0	0.463190863403436	0	0	0	1.37927863111041e-79
CAMKV	1	0	0	1	0	0	0	0.25567107905373	0	0	0	1.65119014596051e-08	0
CAP1	1	0	1	0	0	0	0.253437787626878	0	0	0	4.68044450777455e-11	0	0
CAPZB	1	1	0	0	0	0.304279067222527	0	0	0	4.23534086980617e-14	0	0	0
CASKIN1	1	1	0	0	0	0.251621718417147	0	0	0	2.29013282095038e-09	0	0	0
CBLN4	1	0	0	1	0	0	0	0.264408906515636	0	0	0	4.56811648887234e-13	0
CBX6	1	1	0	0	0	0.279018642927215	0	0	0	8.96127307796021e-10	0	0	0
CCDC3	1	0	0	0	1	0	0	0	0.381898893023634	0	0	0	2.22623442221202e-29
CCDC6	1	0	1	0	0	0	0.298693787073136	0	0	0	1.24996888367046e-17	0	0
CCDC85B	1	1	0	0	0	0.267041487981773	0	0	0	1.02002427687531e-10	0	0	0
CCK	1	0	0	1	0	0	0	0.352123124952374	0	0	0	8.61061136763239e-28	0
CD14	1	0	0	0	1	0	0	0	0.299745866654107	0	0	0	1.7443052430841e-15
CD59	1	0	1	0	0	0	0.297646957003848	0	0	0	1.65209280157536e-20	0	0
CD81	1	0	1	0	0	0	0.382011078194731	0	0	0	2.83715831333408e-40	0	0
CD99	1	0	1	0	0	0	0.517395576855706	0	0	0	3.50610632211052e-45	0	0
CDC42	1	1	0	0	0	0.301114655405546	0	0	0	1.11763878590174e-12	0	0	0
CDC42SE2	1	1	0	0	0	0.253789550138258	0	0	0	3.34391881340373e-06	0	0	0
CDK2AP1	1	1	0	0	0	0.351988489847873	0	0	0	1.95587238528018e-17	0	0	0
CDK5R1	1	0	0	1	0	0	0	0.300709653511649	0	0	0	1.54971968293311e-12	0
CDK5R2	1	1	0	0	0	0.285579302143176	0	0	0	1.02131661358295e-11	0	0	0
CEBPB	1	0	0	0	1	0	0	0	0.327652235482937	0	0	0	6.92890608272691e-21
CELF5	1	1	0	0	0	0.376523960307461	0	0	0	2.42161167135041e-18	0	0	0
CHCHD2	1	0	0	0	1	0	0	0	0.258456578459429	0	0	0	1.50373753086593e-13
CHD3	1	1	0	0	0	0.289140082481449	0	0	0	6.47097150722218e-10	0	0	0
CHGB	1	0	0	1	0	0	0	0.344134022115402	0	0	0	7.98570234406718e-22	0
CLDN10	1	1	0	0	0	0.367385596851988	0	0	0	4.66390363922062e-15	0	0	0
CLIC4	1	0	0	0	1	0	0	0	0.251535358538907	0	0	0	1.56165132528748e-15
CMAS	1	1	0	0	0	0.265783889828183	0	0	0	3.69753364994383e-07	0	0	0
CNDP1	1	0	0	1	0	0	0	0.264425210287514	0	0	0	2.94447944045265e-21	0
CNN3	1	0	1	0	0	0	0.383053962755067	0	0	0	4.33426181060244e-27	0	0
CNOT7	1	1	0	0	0	0.25656857345346	0	0	0	1.79579784179587e-10	0	0	0
CNTN2	1	0	0	1	0	0	0	0.269567565413004	0	0	0	1.91538072573459e-10	0
CNTN5	1	0	0	1	0	0	0	0.309519402384769	0	0	0	4.69710463317656e-27	0
COPS9	1	0	1	0	0	0	0.254056516289719	0	0	0	7.12261436566597e-20	0	0
COX6A1	1	1	0	0	0	0.291388882509928	0	0	0	6.10301435057872e-31	0	0	0
CSF1R	1	1	0	0	0	0.254976216429097	0	0	0	1.8006899683069e-15	0	0	0
CSPG5	1	1	0	0	0	0.414858299140383	0	0	0	3.99259810539899e-25	0	0	0
CST3	1	0	1	0	0	0	0.344067885659972	0	0	0	4.5778123872913e-77	0	0
CSTB	1	0	1	0	0	0	0.381339896422595	0	0	0	1.66807045609478e-28	0	0
CTNNA2	1	1	0	0	0	0.275931670039914	0	0	0	2.87501283305308e-11	0	0	0
CTNND2	1	1	0	0	0	0.322555268982595	0	0	0	4.05890731026041e-14	0	0	0
CXCL14	1	0	0	0	1	0	0	0	0.327076573834887	0	0	0	1.27098331443078e-08
CYB5R3	1	0	1	0	0	0	0.274631502615476	0	0	0	1.24881776327428e-13	0	0
CYFIP2	1	0	0	1	0	0	0	0.274531853064902	0	0	0	3.93170809708368e-11	0
CYSTM1	1	1	0	0	0	0.254266650108866	0	0	0	9.31906412000768e-08	0	0	0
DAAM2	1	1	0	0	0	0.282190157707496	0	0	0	2.79795241217226e-16	0	0	0
DCTN1	1	0	0	1	0	0	0	0.260310875655649	0	0	0	3.33387038836781e-08	0
DCXR	1	1	0	0	0	0.279330242213057	0	0	0	5.1863772694579e-11	0	0	0
DDAH1	1	1	0	0	0	0.337991684965206	0	0	0	4.12887692567972e-14	0	0	0
DDRGK1	1	0	0	0	1	0	0	0	0.282261402618547	0	0	0	9.47986891722965e-17
DMWD	1	1	0	0	0	0.271569637764906	0	0	0	3.56269119324707e-14	0	0	0
DNAJB2	1	0	1	0	0	0	0.332228692312141	0	0	0	7.70206334812539e-22	0	0
DNAJB4	1	0	1	0	0	0	0.252099627147323	0	0	0	7.8071421976826e-16	0	0
DNAJC6	1	1	0	0	0	0.328304246809517	0	0	0	2.85634393602745e-17	0	0	0
DPP6	1	0	0	0	1	0	0	0	0.301869924161553	0	0	0	2.58325159367053e-18
DPYSL2	1	0	0	0	1	0	0	0	0.319045879002983	0	0	0	3.99810231740632e-44
DPYSL3	1	0	1	0	0	0	0.33468240055027	0	0	0	6.02247437237445e-20	0	0
DTNBP1	1	0	0	1	0	0	0	0.276587384164989	0	0	0	2.23096677377344e-14	0
DYNC1I1	1	1	0	0	0	0.277318692076649	0	0	0	4.77191200612726e-09	0	0	0
DYNLL1	1	0	0	0	1	0	0	0	0.279035379115449	0	0	0	4.512269227947e-33
DYNLL2	1	0	1	0	0	0	0.284313609308163	0	0	0	1.28333660193898e-19	0	0
EEF1G	1	0	1	0	0	0	0.35131134327938	0	0	0	9.24639645418589e-27	0	0
EEF2	1	0	1	0	0	0	0.275537808370174	0	0	0	2.97474524671843e-26	0	0
EFHD1	1	1	0	0	0	0.279866685045352	0	0	0	4.26337392557208e-09	0	0	0
EFHD2	1	1	0	0	0	0.278610632827082	0	0	0	3.65079468824443e-09	0	0	0
EFNB3	1	1	0	0	0	0.251690217041493	0	0	0	1.6674171852561e-11	0	0	0
EFR3B	1	1	0	0	0	0.269456117595773	0	0	0	2.94153910711702e-10	0	0	0
EHD3	1	0	1	0	0	0	0.251332618698195	0	0	0	7.87798980523418e-09	0	0
EIF1	1	0	1	0	0	0	0.259274107513182	0	0	0	2.62919656892618e-30	0	0
EIF4A2	1	0	0	0	1	0	0	0	0.259842109937092	0	0	0	9.43657605145925e-28
EIF4G2	1	0	1	0	0	0	0.250007956319426	0	0	0	6.08950890502281e-14	0	0
EIF5A	1	0	1	0	0	0	0.254608098771702	0	0	0	7.83213004072635e-11	0	0
ENPP2	1	0	0	1	0	0	0	0.259329657860914	0	0	0	7.46765185122279e-19	0
ENSA	1	1	0	0	0	0.288206860831091	0	0	0	7.83490506476106e-10	0	0	0
EPB41L4B	1	0	0	1	0	0	0	0.253369927463002	0	0	0	3.33896172904488e-12	0
EPDR1	1	0	1	0	0	0	0.251722391076064	0	0	0	2.37075623886361e-10	0	0
EZR	1	1	0	0	0	0.425914924622579	0	0	0	1.81866557158177e-26	0	0	0
FABP5	1	0	0	0	1	0	0	0	0.289968331418781	0	0	0	1.45803431899557e-12
FAM102A	1	0	0	1	0	0	0	0.266650665696221	0	0	0	6.53082307148607e-11	0
FAM131A	1	1	0	0	0	0.298921432109266	0	0	0	2.50193447190788e-11	0	0	0
FAM13B	1	1	0	0	0	0.25436495138724	0	0	0	1.77937214466291e-10	0	0	0
FAM171B	1	1	0	0	0	0.356862507007364	0	0	0	3.43110524082574e-17	0	0	0
FAM49A	1	1	0	0	0	0.290663754098554	0	0	0	8.62078744403417e-10	0	0	0
FAM53C	1	1	0	0	0	0.25329442580465	0	0	0	4.09218013352573e-10	0	0	0
FARP1	1	0	1	0	0	0	0.306864434830059	0	0	0	1.5198573579303e-16	0	0
FASN	1	0	0	1	0	0	0	0.268387731103675	0	0	0	2.15165954544327e-09	0
FAU	1	0	1	0	0	0	0.285672048329302	0	0	0	1.03251344163485e-30	0	0
FBXO2	1	1	0	0	0	0.358825435844404	0	0	0	6.17320135898518e-19	0	0	0
FEZ1	1	1	0	0	0	0.271553962923809	0	0	0	1.62937089847235e-06	0	0	0
FGFR3	1	1	0	0	0	0.42559890167122	0	0	0	3.89686538974085e-18	0	0	0
FLOT2	1	0	1	0	0	0	0.292331278795622	0	0	0	1.10294977640585e-16	0	0
FMNL2	1	1	0	0	0	0.276176739845679	0	0	0	4.93950622944757e-09	0	0	0
FTH1	1	0	1	0	0	0	0.286374635586708	0	0	0	3.63998075521367e-101	0	0
GABBR1	1	0	0	1	0	0	0	0.33092473857452	0	0	0	9.84007984398954e-17	0
GAREM2	1	0	0	1	0	0	0	0.25489224962879	0	0	0	2.69261669051514e-17	0
GAS2L1	1	1	0	0	0	0.267163350605251	0	0	0	1.22366841550724e-08	0	0	0
GATM	1	1	0	0	0	0.326718203653882	0	0	0	7.27561749063242e-11	0	0	0
GBA	1	1	0	0	0	0.259170440927293	0	0	0	2.08386361385652e-11	0	0	0
GDI1	1	1	0	0	0	0.338002709870042	0	0	0	1.57126699935906e-26	0	0	0
GIT1	1	1	0	0	0	0.274756795367167	0	0	0	3.44107699389883e-09	0	0	0
GLUD1	1	1	0	0	0	0.377672612787483	0	0	0	2.25356980445994e-21	0	0	0
GMFB	1	1	0	0	0	0.342441696410062	0	0	0	3.24409609096901e-16	0	0	0
GNA12	1	0	1	0	0	0	0.256164892760742	0	0	0	4.1103409760572e-10	0	0
GNAI2	1	1	0	0	0	0.25689533162496	0	0	0	3.75668139612143e-09	0	0	0
GNAL	1	0	0	0	1	0	0	0	0.35859686782079	0	0	0	2.1807505895532e-27
GPR37	1	0	0	1	0	0	0	0.261267609155948	0	0	0	3.65231492917311e-25	0
GPR37L1	1	1	0	0	0	0.323567962390565	0	0	0	2.42456219728174e-11	0	0	0
GRIA3	1	1	0	0	0	0.304773749399323	0	0	0	3.69158825879166e-10	0	0	0
GRIN1	1	1	0	0	0	0.269666761556605	0	0	0	2.54169064514758e-21	0	0	0
GRIN2B	1	1	0	0	0	0.290324998744301	0	0	0	3.85405652003544e-11	0	0	0
GUCY1B1	1	1	0	0	0	0.286403177030919	0	0	0	1.65739790475601e-08	0	0	0
GUK1	1	1	0	0	0	0.296229656362347	0	0	0	1.74807918987338e-17	0	0	0
HCFC1R1	1	1	0	0	0	0.280440325583296	0	0	0	3.13635983676695e-10	0	0	0
HIP1R	1	1	0	0	0	0.253292275380318	0	0	0	1.10163124484816e-09	0	0	0
HLA-DPB1	1	1	0	0	0	0.292210575243095	0	0	0	1.38758250050808e-16	0	0	0
HMGCR	1	0	0	1	0	0	0	0.283247475383915	0	0	0	4.50473776853238e-12	0
HPCAL1	1	0	0	0	1	0	0	0	0.295043540759172	0	0	0	2.10464976382264e-20
HSPA4	1	0	0	0	1	0	0	0	0.253472555203899	0	0	0	9.98985439453347e-13
IFI6	1	1	0	0	0	0.277660513990762	0	0	0	5.63089126371049e-07	0	0	0
IFITM2	1	0	0	0	1	0	0	0	0.434301013504872	0	0	0	2.70471388603246e-32
IGFBP5	1	1	0	0	0	0.280500121848895	0	0	0	8.69827203085016e-10	0	0	0
IGFBP7	1	0	1	0	0	0	0.427394712827532	0	0	0	8.90473210371278e-31	0	0
IPO13	1	1	0	0	0	0.252520855920095	0	0	0	4.81682384504084e-10	0	0	0
IQSEC2	1	1	0	0	0	0.258204568347374	0	0	0	1.08810282387135e-09	0	0	0
ITPK1	1	1	0	0	0	0.348705407716263	0	0	0	4.70758566948321e-13	0	0	0
JUND	1	1	0	0	0	0.376406889466821	0	0	0	1.2979845990233e-22	0	0	0
KCNAB2	1	1	0	0	0	0.255714249141716	0	0	0	2.20313789064935e-10	0	0	0
KCNIP2	1	0	0	0	1	0	0	0	0.310609380738232	0	0	0	4.11015867489472e-17
KCNJ10	1	1	0	0	0	0.360942374438426	0	0	0	3.28525717019279e-18	0	0	0
KCNJ9	1	0	0	1	0	0	0	0.262639689656866	0	0	0	1.42003315302725e-11	0
KCNK1	1	0	0	0	1	0	0	0	0.323861571741689	0	0	0	2.45127571939149e-17
KCNN3	1	1	0	0	0	0.252861191705374	0	0	0	4.9293142316433e-12	0	0	0
KCTD17	1	1	0	0	0	0.272874441870186	0	0	0	7.82990414410095e-11	0	0	0
KIF1B	1	1	0	0	0	0.292118834985388	0	0	0	2.69489295071374e-12	0	0	0
KIF21A	1	1	0	0	0	0.25550270039254	0	0	0	2.22614785644885e-06	0	0	0
KIF5B	1	1	0	0	0	0.256983085562974	0	0	0	6.61764429539514e-08	0	0	0
KIF5C	1	1	0	0	0	0.279114002618745	0	0	0	8.13123784861012e-13	0	0	0
KLC1	1	1	0	0	0	0.265462798629102	0	0	0	7.1167136950457e-17	0	0	0
KRTCAP2	1	0	1	0	0	0	0.299047452443123	0	0	0	1.96254162750319e-16	0	0
L1CAM	1	0	0	1	0	0	0	0.261341022162161	0	0	0	1.5006315496535e-11	0
LAMP2	1	1	0	0	0	0.280278584717037	0	0	0	5.18191844986724e-11	0	0	0
LAPTM5	1	0	1	0	0	0	0.39087200687474	0	0	0	1.8751132922948e-39	0	0
LGI4	1	0	1	0	0	0	0.250227409729969	0	0	0	9.97402398504237e-11	0	0
LHX2	1	1	0	0	0	0.296397253020274	0	0	0	8.53686574595515e-16	0	0	0
LINC02607	1	0	1	0	0	0	0.262139751813841	0	0	0	5.16843923328845e-15	0	0
LMBRD2	1	1	0	0	0	0.260400897856346	0	0	0	7.49249910512288e-08	0	0	0
LRPAP1	1	0	0	1	0	0	0	0.347313398929532	0	0	0	1.25827007983912e-16	0
LRRC4B	1	1	0	0	0	0.319313585513324	0	0	0	6.73561750806243e-13	0	0	0
LSAMP	1	1	0	0	0	0.272331088530869	0	0	0	2.12096932239711e-08	0	0	0
LYRM9	1	1	0	0	0	0.257293211166328	0	0	0	4.40719944562543e-10	0	0	0
MAN1A2	1	0	1	0	0	0	0.272870860872967	0	0	0	1.08215853263984e-11	0	0
MAP1A	1	1	0	0	0	0.437063236426455	0	0	0	3.92996301319504e-43	0	0	0
MAP2	1	0	1	0	0	0	0.31214681520592	0	0	0	4.6838494495022e-35	0	0
MAP4	1	1	0	0	0	0.28746800230173	0	0	0	3.69723305921168e-11	0	0	0
MAP4K4	1	1	0	0	0	0.256808245104447	0	0	0	2.67127866723056e-05	0	0	0
MAP7D2	1	1	0	0	0	0.269565429637858	0	0	0	5.11832299682452e-09	0	0	0
MAPRE2	1	0	0	0	1	0	0	0	0.316766040750418	0	0	0	8.5498272414564e-21
MAPRE3	1	1	0	0	0	0.263010723748577	0	0	0	5.37652288365938e-10	0	0	0
MARCKS	1	1	0	0	0	0.341884702438148	0	0	0	4.09464746798166e-15	0	0	0
MARCKSL1	1	1	0	0	0	0.280418899869738	0	0	0	1.49858632278484e-07	0	0	0
MAT2A	1	1	0	0	0	0.287092501772186	0	0	0	1.81071727049927e-07	0	0	0
MET	1	0	0	1	0	0	0	0.267595313885044	0	0	0	4.26803118579901e-14	0
MFSD4A	1	0	0	0	1	0	0	0	0.319831012161371	0	0	0	1.76754130708964e-14
MFSD6	1	1	0	0	0	0.268748664837169	0	0	0	2.61763738395496e-09	0	0	0
MKNK2	1	0	1	0	0	0	0.251227884722397	0	0	0	8.58250202524761e-18	0	0
MLC1	1	1	0	0	0	0.318288180123192	0	0	0	5.10668487247919e-13	0	0	0
MOB1B	1	0	0	0	1	0	0	0	0.250335481030974	0	0	0	3.07026289635733e-11
MRPL41	1	1	0	0	0	0.299987373784455	0	0	0	3.0513235874062e-11	0	0	0
MSMO1	1	0	0	1	0	0	0	0.255706862576053	0	0	0	3.232044736673e-08	0
MTSS2	1	1	0	0	0	0.275213223612687	0	0	0	1.17576291035604e-12	0	0	0
MYBPC1	1	1	0	0	0	0.38243182357367	0	0	0	1.91369294508054e-21	0	0	0
MYL6	1	0	1	0	0	0	0.465945495722535	0	0	0	3.65624799999448e-52	0	0
MYO10	1	1	0	0	0	0.289192341664612	0	0	0	2.95776665830767e-15	0	0	0
MYRF	1	0	0	1	0	0	0	0.268081288137973	0	0	0	2.9724711958257e-16	0
NACC1	1	1	0	0	0	0.252169931510563	0	0	0	7.27769877155823e-09	0	0	0
NDRG4	1	1	0	0	0	0.285213459149363	0	0	0	3.50566427052642e-15	0	0	0
NDUFAF8	1	0	1	0	0	0	0.340659055124397	0	0	0	4.77329744073938e-20	0	0
NDUFB7	1	1	0	0	0	0.263342477815534	0	0	0	1.15863833821715e-10	0	0	0
NDUFB8	1	1	0	0	0	0.28857033786078	0	0	0	8.76764282328819e-14	0	0	0
NDUFC2	1	0	0	1	0	0	0	0.273415395153296	0	0	0	1.07934268781417e-09	0
NECAB1	1	1	0	0	0	0.333808724693987	0	0	0	1.07481503243098e-13	0	0	0
NECAP1	1	0	0	1	0	0	0	0.262570471293668	0	0	0	6.34385642840587e-10	0
NEFM	1	1	0	0	0	0.250689725870306	0	0	0	1.25542339502696e-07	0	0	0
NFIB	1	1	0	0	0	0.283841682244635	0	0	0	7.25734610069562e-10	0	0	0
NFIX	1	1	0	0	0	0.26608532163152	0	0	0	8.92289237147647e-10	0	0	0
NKX6-2	1	0	0	1	0	0	0	0.261971221325947	0	0	0	1.20471223427831e-20	0
NLRP1	1	1	0	0	0	0.302314395789181	0	0	0	1.26711864455604e-14	0	0	0
NNAT	1	1	0	0	0	0.475206973355411	0	0	0	1.12839450009898e-26	0	0	0
NPC2	1	0	1	0	0	0	0.273602904860984	0	0	0	2.66948555683344e-14	0	0
NPDC1	1	0	0	0	1	0	0	0	0.290317825076817	0	0	0	2.77229841516071e-19
NPEPPS	1	0	0	1	0	0	0	0.257749080491685	0	0	0	1.11357866258611e-10	0
NPTX2	1	0	0	0	1	0	0	0	0.417017522470948	0	0	0	3.69877563219578e-35
NQO1	1	0	1	0	0	0	0.308038290902665	0	0	0	2.45873399964688e-18	0	0
NR2F1	1	1	0	0	0	0.318933634342968	0	0	0	6.32615498090259e-16	0	0	0
NTRK2	1	1	0	0	0	0.359025348592182	0	0	0	3.3012646974894e-22	0	0	0
NTSR2	1	1	0	0	0	0.318825502854973	0	0	0	2.25281209315641e-17	0	0	0
NUCKS1	1	1	0	0	0	0.340344868770207	0	0	0	2.41896834194672e-16	0	0	0
NUDT3	1	1	0	0	0	0.28880180383327	0	0	0	3.78221484447634e-12	0	0	0
NUMBL	1	0	0	1	0	0	0	0.255535047105445	0	0	0	3.54310155771216e-12	0
OLFM2	1	1	0	0	0	0.308475441160216	0	0	0	1.98986137028931e-16	0	0	0
OST4	1	0	1	0	0	0	0.308409260870627	0	0	0	3.08273955919977e-18	0	0
PAFAH1B1	1	0	0	1	0	0	0	0.31290205265735	0	0	0	3.74534867062323e-13	0
PCDH9	1	1	0	0	0	0.267474685961726	0	0	0	8.03531334277993e-08	0	0	0
PDE1A	1	0	0	1	0	0	0	0.284672741261071	0	0	0	1.21368874998397e-12	0
PFKP	1	1	0	0	0	0.289151790712335	0	0	0	7.04453678585898e-12	0	0	0
PHLPP1	1	1	0	0	0	0.255144982628039	0	0	0	2.04269884686577e-09	0	0	0
PIN1	1	1	0	0	0	0.257484890796531	0	0	0	4.90225979622376e-09	0	0	0
PIP4K2B	1	1	0	0	0	0.253986767207039	0	0	0	2.94660414452933e-08	0	0	0
PJA2	1	0	0	1	0	0	0	0.252649491516853	0	0	0	9.78694164109567e-09	0
PLTP	1	0	1	0	0	0	0.516502362662153	0	0	0	6.8771403688316e-50	0	0
PLXNB1	1	1	0	0	0	0.280774639973272	0	0	0	6.04304661484302e-11	0	0	0
PPIB	1	0	1	0	0	0	0.305663680298792	0	0	0	3.16672721847737e-16	0	0
PPP1R14A	1	0	0	1	0	0	0	0.253740839023748	0	0	0	1.16644609791162e-10	0
PPP1R9B	1	1	0	0	0	0.307040156056075	0	0	0	7.55543218179355e-10	0	0	0
PPP3R1	1	1	0	0	0	0.256176865519124	0	0	0	1.47953231086881e-06	0	0	0
PPT1	1	0	1	0	0	0	0.263823760608994	0	0	0	1.09481969806796e-12	0	0
PRDX3	1	1	0	0	0	0.269755334483649	0	0	0	7.02075210706613e-09	0	0	0
PRRC2B	1	1	0	0	0	0.259894150179837	0	0	0	4.21441021795467e-08	0	0	0
PSAT1	1	1	0	0	0	0.2738690402545	0	0	0	2.91728748499617e-10	0	0	0
PSD	1	0	1	0	0	0	0.326987004079283	0	0	0	5.1909982533523e-30	0	0
PTGDS	1	1	0	0	0	0.418325877967902	0	0	0	4.27073200140424e-50	0	0	0
PTMS	1	1	0	0	0	0.303086811878492	0	0	0	3.80984598491967e-16	0	0	0
PTN	1	1	0	0	0	0.30433505669652	0	0	0	4.45279306707409e-11	0	0	0
PTP4A2	1	1	0	0	0	0.263465650650939	0	0	0	2.29014126387782e-07	0	0	0
PTPRA	1	1	0	0	0	0.25306750266599	0	0	0	2.2294356636205e-07	0	0	0
PTPRN	1	1	0	0	0	0.265262731939539	0	0	0	2.05390529251014e-09	0	0	0
RAB31	1	1	0	0	0	0.264238427169757	0	0	0	2.49604958626845e-09	0	0	0
RAB40B	1	0	0	0	1	0	0	0	0.27844175488422	0	0	0	8.93860589788624e-14
RAB7A	1	0	1	0	0	0	0.279174143278934	0	0	0	1.10742769183848e-13	0	0
RACK1	1	0	1	0	0	0	0.3512334889448	0	0	0	3.26944082665773e-27	0	0
RAMP1	1	0	1	0	0	0	0.386836093464504	0	0	0	1.67658237242268e-31	0	0
RAP1GAP	1	1	0	0	0	0.314814756851106	0	0	0	2.21584316094955e-13	0	0	0
RAPGEF4	1	1	0	0	0	0.279930662525301	0	0	0	6.76866382313182e-09	0	0	0
RASD1	1	0	1	0	0	0	0.319667340862752	0	0	0	1.63948799526611e-19	0	0
RASL10A	1	0	0	1	0	0	0	0.254753812582816	0	0	0	1.35493167229925e-11	0
RCN1	1	0	0	0	1	0	0	0	0.371374419212867	0	0	0	4.67481899305069e-27
RFK	1	0	0	1	0	0	0	0.271345653132088	0	0	0	4.35198586854389e-15	0
RHOC	1	0	1	0	0	0	0.338464689559129	0	0	0	8.80243576701754e-20	0	0
RNASET2	1	0	1	0	0	0	0.320136069147963	0	0	0	1.17929341669483e-17	0	0
RNF11	1	1	0	0	0	0.253362825517398	0	0	0	3.03079357084296e-08	0	0	0
RPL10A	1	0	1	0	0	0	0.262767035935515	0	0	0	9.66063413997912e-17	0	0
RPL12	1	0	1	0	0	0	0.388523856455201	0	0	0	2.39608211726991e-31	0	0
RPL13	1	0	1	0	0	0	0.356222924280346	0	0	0	5.47980806721119e-59	0	0
RPL13A	1	0	1	0	0	0	0.29805913900151	0	0	0	2.02589149353177e-35	0	0
RPL17	1	0	0	0	1	0	0	0	0.292204694346828	0	0	0	2.22161482921688e-33
RPL18	1	0	1	0	0	0	0.294286933560875	0	0	0	1.08351251526327e-30	0	0
RPL18A	1	0	1	0	0	0	0.262610949107363	0	0	0	8.76586815427575e-24	0	0
RPL23	1	0	1	0	0	0	0.34098980778685	0	0	0	3.87344567291574e-27	0	0
RPL27	1	0	1	0	0	0	0.31800936679783	0	0	0	1.16661555238724e-29	0	0
RPL27A	1	0	1	0	0	0	0.421185207873609	0	0	0	5.2161927087747e-42	0	0
RPL28	1	0	1	0	0	0	0.351630461773872	0	0	0	8.21163673331037e-59	0	0
RPL29	1	0	1	0	0	0	0.382239760186059	0	0	0	2.6471893407894e-47	0	0
RPL30	1	0	1	0	0	0	0.308011757699889	0	0	0	6.10699166507944e-32	0	0
RPL31	1	0	1	0	0	0	0.317918276488298	0	0	0	1.86373947385017e-44	0	0
RPL35	1	0	1	0	0	0	0.305503338209093	0	0	0	9.99212174181771e-32	0	0
RPL39	1	0	1	0	0	0	0.475492496733179	0	0	0	2.0028600973685e-63	0	0
RPL4	1	0	0	0	1	0	0	0	0.260672799814872	0	0	0	1.65002954649282e-29
RPL5	1	0	1	0	0	0	0.259630010007495	0	0	0	9.44819766097406e-22	0	0
RPL7A	1	0	0	0	1	0	0	0	0.268676082031786	0	0	0	1.79832075498907e-25
RPLP1	1	0	1	0	0	0	0.336708638052553	0	0	0	2.87065780872275e-60	0	0
RPLP2	1	0	1	0	0	0	0.322028917422289	0	0	0	1.86765081017408e-34	0	0
RPS11	1	0	1	0	0	0	0.333792745895379	0	0	0	1.30012447247149e-36	0	0
RPS15	1	0	1	0	0	0	0.251122858240624	0	0	0	6.90798929224508e-31	0	0
RPS15A	1	0	1	0	0	0	0.257629632710745	0	0	0	2.75973256634581e-14	0	0
RPS16	1	0	1	0	0	0	0.284722993191145	0	0	0	7.25244074541362e-26	0	0
RPS17	1	0	1	0	0	0	0.373422243260489	0	0	0	1.73127717838069e-37	0	0
RPS18	1	0	1	0	0	0	0.446911893792125	0	0	0	1.87103431617314e-64	0	0
RPS23	1	0	1	0	0	0	0.264427628900173	0	0	0	8.98417901945033e-26	0	0
RPS24	1	0	1	0	0	0	0.293464783818238	0	0	0	1.26542604923026e-27	0	0
RPS28	1	0	1	0	0	0	0.380613427807428	0	0	0	2.92286180122122e-71	0	0
RPS3	1	0	1	0	0	0	0.326175421774704	0	0	0	2.02407000643422e-24	0	0
RPS5	1	0	1	0	0	0	0.30653714205514	0	0	0	2.70975039496962e-21	0	0
RPS9	1	0	1	0	0	0	0.271529918939474	0	0	0	2.22747640801321e-20	0	0
RTN4RL2	1	1	0	0	0	0.258460673442253	0	0	0	3.86050947983314e-10	0	0	0
RUFY3	1	1	0	0	0	0.276032461032536	0	0	0	7.1934632986932e-10	0	0	0
S100A1	1	0	0	0	1	0	0	0	0.313978873053419	0	0	0	1.8188790304836e-16
SASH1	1	1	0	0	0	0.297452126615399	0	0	0	2.36168324186506e-12	0	0	0
SATB1	1	1	0	0	0	0.302246520182516	0	0	0	1.61554014137668e-11	0	0	0
SDC4	1	1	0	0	0	0.336403572600268	0	0	0	5.83325079884667e-15	0	0	0
SEMA6B	1	1	0	0	0	0.288848211852585	0	0	0	7.90381750090564e-13	0	0	0
SEPTIN2	1	1	0	0	0	0.358719335673954	0	0	0	1.65011012932685e-17	0	0	0
SEPTIN4	1	1	0	0	0	0.277100381862198	0	0	0	4.09513559163082e-07	0	0	0
SEPTIN7	1	1	0	0	0	0.256303683584967	0	0	0	8.87938317157868e-11	0	0	0
SERPINA1	1	0	0	0	1	0	0	0	0.296518888270885	0	0	0	5.22753846474238e-34
SESN3	1	0	1	0	0	0	0.280081971361221	0	0	0	2.47092206917942e-13	0	0
SEZ6L	1	0	0	0	1	0	0	0	0.257833656937443	0	0	0	8.61855437084527e-12
SFPQ	1	0	1	0	0	0	0.276821473087791	0	0	0	1.99590495502943e-14	0	0
SFXN5	1	1	0	0	0	0.276964944738675	0	0	0	4.34601872034014e-11	0	0	0
SH3GL3	1	1	0	0	0	0.292834067361209	0	0	0	3.97321133660058e-10	0	0	0
SHISAL1	1	1	0	0	0	0.271601453760767	0	0	0	3.50527627324491e-15	0	0	0
SHOC2	1	1	0	0	0	0.303972146149986	0	0	0	1.01358816855672e-13	0	0	0
SIRT2	1	1	0	0	0	0.266152907139282	0	0	0	8.71404379795017e-08	0	0	0
SLC23A2	1	1	0	0	0	0.292341900999047	0	0	0	4.53797878613237e-13	0	0	0
SLC25A18	1	1	0	0	0	0.25607338004879	0	0	0	4.35645768630023e-09	0	0	0
SLC25A22	1	1	0	0	0	0.305624482745744	0	0	0	7.02672404928791e-12	0	0	0
SLC25A23	1	0	1	0	0	0	0.302063299451035	0	0	0	1.21395588140195e-19	0	0
SLC39A10	1	0	0	1	0	0	0	0.264625772919145	0	0	0	1.98611380696774e-05	0
SLC4A10	1	0	0	1	0	0	0	0.275189008204314	0	0	0	7.03899657781595e-09	0
SLC4A4	1	1	0	0	0	0.259441846977783	0	0	0	1.20867857386793e-08	0	0	0
SLC6A15	1	1	0	0	0	0.251803398962688	0	0	0	2.46946936600934e-11	0	0	0
SMARCD3	1	1	0	0	0	0.256436221290632	0	0	0	2.85050346724019e-06	0	0	0
SNHG8	1	0	1	0	0	0	0.294601901091065	0	0	0	1.57897029887551e-16	0	0
SOX2	1	1	0	0	0	0.323047629365696	0	0	0	4.60665440287783e-20	0	0	0
SOX2-OT	1	1	0	0	0	0.261249628732916	0	0	0	3.50070436719118e-08	0	0	0
SPRYD3	1	0	0	0	1	0	0	0	0.297880183155309	0	0	0	4.90083919839276e-19
SPTBN1	1	1	0	0	0	0.287360679132465	0	0	0	7.68451982027169e-14	0	0	0
SPTBN2	1	1	0	0	0	0.290594860856779	0	0	0	1.40869424720978e-11	0	0	0
SQSTM1	1	0	1	0	0	0	0.352650395681577	0	0	0	1.30173824407094e-27	0	0
SREBF1	1	1	0	0	0	0.347479490440019	0	0	0	1.24457532975606e-17	0	0	0
SREBF2	1	0	0	0	1	0	0	0	0.355788487382394	0	0	0	6.42058596218887e-28
SRSF2	1	1	0	0	0	0.251049744695644	0	0	0	7.94019224519365e-06	0	0	0
SSR4	1	0	1	0	0	0	0.302691278349835	0	0	0	5.39496795933246e-19	0	0
STAB1	1	0	0	0	1	0	0	0	0.285782940102008	0	0	0	1.13295891767102e-29
STIP1	1	0	0	0	1	0	0	0	0.292479537478854	0	0	0	8.80977257443127e-20
STOM	1	0	1	0	0	0	0.282558873302509	0	0	0	7.5301419263372e-14	0	0
SURF1	1	1	0	0	0	0.269329022357275	0	0	0	6.78550951978862e-11	0	0	0
SYN1	1	1	0	0	0	0.316090354515579	0	0	0	1.28052225466685e-22	0	0	0
SYT4	1	1	0	0	0	0.257686679595563	0	0	0	7.21080963519566e-07	0	0	0
SYT5	1	0	0	1	0	0	0	0.292028367260508	0	0	0	3.16124661494068e-12	0
SYTL2	1	1	0	0	0	0.256267635792801	0	0	0	4.51620669924918e-09	0	0	0
TBCB	1	1	0	0	0	0.287718966694438	0	0	0	1.65503822346963e-11	0	0	0
TCEAL7	1	0	0	1	0	0	0	0.301055684448725	0	0	0	8.57015435939355e-13	0
TEF	1	1	0	0	0	0.259642008488084	0	0	0	1.70712546730478e-11	0	0	0
TENM2	1	1	0	0	0	0.270681817370319	0	0	0	1.47890835042579e-11	0	0	0
THRA	1	0	1	0	0	0	0.294182302053743	0	0	0	4.77210092504676e-20	0	0
TIMP3	1	1	0	0	0	0.305339003670085	0	0	0	6.75609863508044e-13	0	0	0
TKT	1	0	1	0	0	0	0.256369616587252	0	0	0	8.14273919488304e-08	0	0
TM2D3	1	0	0	1	0	0	0	0.260522957301506	0	0	0	2.03652249309314e-12	0
TMBIM6	1	0	1	0	0	0	0.374160767785768	0	0	0	6.24286646573892e-33	0	0
TMED9	1	0	1	0	0	0	0.254147594825732	0	0	0	6.80284626653079e-15	0	0
TMEM176A	1	0	1	0	0	0	0.279800658869386	0	0	0	4.40505052253384e-21	0	0
TMEM176B	1	0	1	0	0	0	0.353742504268012	0	0	0	7.83777635892881e-31	0	0
TMEM230	1	0	1	0	0	0	0.259473239149696	0	0	0	1.43095452869253e-12	0	0
TMEM59	1	0	1	0	0	0	0.252219174487248	0	0	0	6.49762130279296e-11	0	0
TNR	1	1	0	0	0	0.269434382954014	0	0	0	4.72424641945068e-10	0	0	0
TP53I11	1	0	1	0	0	0	0.305398351896484	0	0	0	1.05985591735318e-20	0	0
TPD52L1	1	1	0	0	0	0.267638898707653	0	0	0	2.2834647194961e-08	0	0	0
TPP1	1	0	1	0	0	0	0.36106376582345	0	0	0	8.10138769799185e-23	0	0
TPT1	1	0	1	0	0	0	0.35343937999127	0	0	0	1.67364006959786e-57	0	0
TRIM8	1	1	0	0	0	0.251373325701704	0	0	0	1.93309002822245e-08	0	0	0
TSPO	1	0	1	0	0	0	0.293131892043478	0	0	0	1.23714354142032e-17	0	0
TSPYL4	1	1	0	0	0	0.253704632561329	0	0	0	2.51417289036588e-09	0	0	0
TTC3	1	1	0	0	0	0.313571015296533	0	0	0	4.37334729721109e-12	0	0	0
TTYH2	1	1	0	0	0	0.321634655607581	0	0	0	2.3978876010292e-16	0	0	0
TUB	1	0	0	1	0	0	0	0.26986117588167	0	0	0	2.54170983624478e-17	0
TUBA4A	1	0	0	1	0	0	0	0.365113812584597	0	0	0	1.8733711227639e-21	0
TUBB3	1	0	0	1	0	0	0	0.348463754108338	0	0	0	4.19127720261568e-18	0
TUBB4A	1	1	0	0	0	0.304817546618206	0	0	0	3.9372558240401e-16	0	0	0
UBB	1	0	1	0	0	0	0.280832692613198	0	0	0	6.65460104153017e-56	0	0
UBE2L3	1	1	0	0	0	0.281920945919522	0	0	0	6.78045056813777e-09	0	0	0
UBE2M	1	1	0	0	0	0.274053657059769	0	0	0	1.78919889765918e-09	0	0	0
UQCC2	1	0	0	0	1	0	0	0	0.26387333905593	0	0	0	1.63827833272082e-14
UQCR11	1	1	0	0	0	0.269121540780338	0	0	0	2.17993210747428e-14	0	0	0
USP22	1	1	0	0	0	0.33187282255253	0	0	0	3.52275972548666e-17	0	0	0
VEGFA	1	0	0	0	1	0	0	0	0.26654921857967	0	0	0	1.00409962003667e-25
VSTM2B	1	0	0	1	0	0	0	0.267643568282235	0	0	0	8.44722136879048e-11	0
WASF3	1	1	0	0	0	0.293212926998247	0	0	0	1.00404209841516e-06	0	0	0
WLS	1	0	1	0	0	0	0.264368544996089	0	0	0	2.31192434228878e-12	0	0
WSB1	1	0	0	1	0	0	0	0.251000505817176	0	0	0	1.10386441553067e-06	0
YBX1	1	0	1	0	0	0	0.321220615996127	0	0	0	3.58448098725775e-19	0	0
YJEFN3	1	0	0	0	1	0	0	0	0.25257736008793	0	0	0	1.03995354520203e-11
ZNF706	1	1	0	0	0	0.25183670090586	0	0	0	2.07023832567411e-07	0	0	0

## Sheet: Layer 2_AD_down_DEG
This spreadsheet is derived from DEGs analysis by comparing gene expression between AD and CT from Layer 2. Column A indicates gene ID. Column B indicates the number of overlapping genes from four comparisons. Column G to column J indicates the log fold change of four comparisons.
Gene	contribution summary					logFC (e as base, cutoff >= 0.25)				adjusted p-value (Wilcoxon test, cutoff <= 0.05)
ID	overlap	AD1 vs CT1	AD2 vs CT2	AD1 vs CT2	AD2 vs CT2	Layer 2_down_logFC_AD1_CT1	Layer 2_down_logFC_AD2_CT1	Layer 2_down_logFC_AD1_CT2	Layer 2_down_logFC_AD2_CT2	Layer 2down_Adj.pval_AD1_CT1	Layer 2down_Adj.pval_AD2_CT1	Layer 2down_Adj.pval_AD1_CT2	Layer 2down_Adj.pval_AD2_CT2
CARTPT	4	1	1	1	1	-1.18131333034237	-1.20785065067292	-0.313897914582674	-0.340435234913225	1.60213831008877e-77	8.81580709342348e-130	9.50384884493908e-17	2.22375949285114e-31
CHGA	3	0	1	1	1	0	-0.354636411733684	-0.520434482872627	-0.799553419051394	0	3.80474969208105e-30	6.51244407558939e-38	1.28401538338928e-111
HBB	3	0	1	1	1	0	-0.358222201030077	-0.467900579048957	-1.01419544169421	0	2.3028113762071e-06	1	4.44799237221902e-63
AGT	2	0	0	1	1	0	0	-0.423332109936589	-0.324463080107979	0	0	2.82270694310935e-24	2.27713170268278e-22
AL121820.2	2	0	0	1	1	0	0	-0.401116415743985	-0.433268931729033	0	0	3.27264885311255e-20	2.87579060018759e-42
CLDN5	2	0	0	1	1	0	0	-0.444115858293608	-0.270348627060649	0	0	9.77214888574578e-19	1.02004394429385e-12
CNST	2	0	1	0	1	0	-0.267568409602476	0	-0.290597914902179	0	3.83917564655954e-19	0	1.58585027749249e-15
DEPP1	2	1	0	1	0	-0.587006922227506	0	-0.278292332101942	0	3.04956387180436e-44	0	2.39974443716213e-11	0
ENHO	2	0	0	1	1	0	0	-0.402078718146647	-0.684372453988224	0	0	2.327857546381e-26	4.28005843772156e-93
GADD45B	2	1	1	0	0	-0.370422267546667	-0.341521880321485	0	0	3.28781169394696e-21	6.95384799992231e-30	0	0
HAPLN4	2	0	1	0	1	0	-0.300561735315442	0	-0.365701037486404	0	5.24054713464883e-25	0	7.5293004904692e-32
HBA1	2	0	0	1	1	0	0	-0.389016366859487	-0.41796946603216	0	0	1.0148408444022e-07	6.83050463523749e-24
HBA2	2	0	0	1	1	0	0	-0.457995479617339	-0.570998932563125	0	0	3.71716148128251e-07	1.73698369156137e-29
LINC00507	2	1	1	0	0	-0.394061479749568	-0.327597491242191	0	0	1.5208164439069e-30	1.05633945379615e-35	0	0
LMO4	2	0	1	0	1	0	-0.29076617446176	0	-0.626668973470303	0	3.31599971771778e-19	0	5.1429463392567e-76
MALAT1	2	0	0	1	1	0	0	-0.570032794296949	-0.746725683977877	0	0	8.83983494650972e-54	7.25990163231188e-124
NGEF	2	1	1	0	0	-0.287375435272505	-0.351019392773139	0	0	1.16157110682999e-12	7.77448775034304e-31	0	0
PPP1R1B	2	0	0	1	1	0	0	-0.379839970305341	-0.487305116315887	0	0	1.01348980263936e-20	5.21702023952484e-51
PRXL2A	2	0	0	1	1	0	0	-0.254249274113897	-0.311628771023818	0	0	1.08143710853279e-09	3.2462611080066e-23
RPS26	2	0	0	1	1	0	0	-0.41218755975134	-0.332811812805633	0	0	1.2451433521737e-27	1.28391454976268e-29
S100B	2	0	0	1	1	0	0	-0.441103623555523	-0.368325233006197	0	0	1.54218581241707e-35	7.30026791182313e-40
TSC22D3	2	0	0	1	1	0	0	-0.431642761373289	-0.391442925717099	0	0	7.55124579344806e-24	4.07337356562153e-31
VSNL1	2	1	1	0	0	-0.284348389509395	-0.319292094188923	0	0	3.01371918943878e-30	7.39878439390472e-56	0	0
VWF	2	0	0	1	1	0	0	-0.436823746779733	-0.450451728243003	0	0	1.71100665095332e-19	2.24106284564891e-36
WIF1	2	0	0	1	1	0	0	-0.335743107897697	-0.370670546904572	0	0	2.0562482732352e-12	7.70769253331534e-27
WNT3	2	1	1	0	0	-0.40952471357357	-0.418434215838708	0	0	3.78686739141886e-31	8.6488867264744e-58	0	0
ACBD7	1	0	0	0	1	0	0	0	-0.278709966096043	0	0	0	5.24698930611428e-15
ANGPTL4	1	1	0	0	0	-0.267999599180476	0	0	0	2.2030837373861e-09	0	0	0
C11orf96	1	0	1	0	0	0	-0.309447914647055	0	0	0	4.10711485755715e-21	0	0
CAMK2G	1	0	0	0	1	0	0	0	-0.291909933078239	0	0	0	1.83548165736969e-15
CBLN2	1	0	1	0	0	0	-0.273594724407121	0	0	0	1.92573566612951e-21	0	0
CIRBP	1	0	0	0	1	0	0	0	-0.288846687250576	0	0	0	1.4499548021357e-16
GAD1	1	0	1	0	0	0	-0.265988850056227	0	0	0	4.25083726573655e-16	0	0
GADD45A	1	1	0	0	0	-0.252513748776509	0	0	0	1.71305687598213e-09	0	0	0
GOLGA8B	1	0	0	0	1	0	0	0	-0.251548917426944	0	0	0	3.73735890835313e-11
GPX3	1	0	0	1	0	0	0	-0.255220553939987	0	0	0	4.64055157152219e-09	0
GSTM3	1	0	0	1	0	0	0	-0.260866585589372	0	0	0	1.27800448161272e-06	0
GSTM5	1	0	0	0	1	0	0	0	-0.275781706316955	0	0	0	1.56915319297623e-18
H1F0	1	0	0	0	1	0	0	0	-0.277527316126901	0	0	0	1.56465246351493e-15
LGALS3	1	0	0	1	0	0	0	-0.425964067834901	0	0	0	9.00418926528364e-20	0
LINC00844	1	0	0	0	1	0	0	0	-0.412068213537898	0	0	0	7.32738546077446e-30
LINC01578	1	0	0	0	1	0	0	0	-0.270390857682079	0	0	0	2.27867331101151e-12
MGP	1	1	0	0	0	-0.341884464194521	0	0	0	1.39460390044001e-18	0	0	0
MT1H	1	0	0	1	0	0	0	-0.42873461513514	0	0	0	7.350363989269e-26	0
MT1X	1	0	0	1	0	0	0	-0.363574166399004	0	0	0	8.28913459899074e-18	0
NAT8L	1	0	0	1	0	0	0	-0.272019511888825	0	0	0	3.21658151009825e-12	0
NEAT1	1	0	0	1	0	0	0	-0.273394442122764	0	0	0	1.87765063746666e-08	0
PDZD2	1	0	0	1	0	0	0	-0.260502854335313	0	0	0	1.30480408719143e-07	0
PON2	1	0	0	0	1	0	0	0	-0.305009457200207	0	0	0	1.63687520741713e-21
PRELP	1	0	0	0	1	0	0	0	-0.2538468069034	0	0	0	1.83762077410028e-12
PRKCB	1	0	0	0	1	0	0	0	-0.279299501853722	0	0	0	6.39100894609789e-17
RBM3	1	0	0	0	1	0	0	0	-0.337270147528972	0	0	0	4.0768313660661e-29
RGS5	1	0	0	0	1	0	0	0	-0.291381807513967	0	0	0	3.26199452246574e-18
RPS27	1	0	0	1	0	0	0	-0.336472236621213	0	0	0	1.70264070497354e-35	0
SAT1	1	0	0	0	1	0	0	0	-0.267309191144671	0	0	0	5.2192606495064e-13
SCARA3	1	0	0	1	0	0	0	-0.291818583003561	0	0	0	4.72506280058349e-09	0
SCG3	1	0	0	1	0	0	0	-0.422903511109802	0	0	0	6.00757020685048e-25	0
SLC1A2	1	0	0	0	1	0	0	0	-0.297301153111736	0	0	0	1.85167804578015e-40
SNHG6	1	0	0	0	1	0	0	0	-0.261999847539141	0	0	0	6.66191421749603e-15
SNTA1	1	0	0	0	1	0	0	0	-0.335409182866784	0	0	0	3.44075499829345e-22
TBR1	1	0	0	0	1	0	0	0	-0.283443702746242	0	0	0	5.79249607660141e-14
TSC22D1	1	1	0	0	0	-0.293789308963206	0	0	0	6.76563060844654e-33	0	0	0
ZFP36	1	1	0	0	0	-0.255446804306945	0	0	0	6.52819817246345e-11	0	0	0
#N/A	#N/A	#N/A	#N/A	#N/A	#N/A	#N/A	#N/A	#N/A	#N/A	#N/A	#N/A	#N/A	#N/A
#N/A	#N/A	#N/A	#N/A	#N/A	#N/A	#N/A	#N/A	#N/A	#N/A	#N/A	#N/A	#N/A	#N/A
#N/A	#N/A	#N/A	#N/A	#N/A	#N/A	#N/A	#N/A	#N/A	#N/A	#N/A	#N/A	#N/A	#N/A
#N/A	#N/A	#N/A	#N/A	#N/A	#N/A	#N/A	#N/A	#N/A	#N/A	#N/A	#N/A	#N/A	#N/A
#N/A	#N/A	#N/A	#N/A	#N/A	#N/A	#N/A	#N/A	#N/A	#N/A	#N/A	#N/A	#N/A	#N/A
#N/A	#N/A	#N/A	#N/A	#N/A	#N/A	#N/A	#N/A	#N/A	#N/A	#N/A	#N/A	#N/A	#N/A
#N/A	#N/A	#N/A	#N/A	#N/A	#N/A	#N/A	#N/A	#N/A	#N/A	#N/A	#N/A	#N/A	#N/A
#N/A	#N/A	#N/A	#N/A	#N/A	#N/A	#N/A	#N/A	#N/A	#N/A	#N/A	#N/A	#N/A	#N/A
#N/A	#N/A	#N/A	#N/A	#N/A	#N/A	#N/A	#N/A	#N/A	#N/A	#N/A	#N/A	#N/A	#N/A
#N/A	#N/A	#N/A	#N/A	#N/A	#N/A	#N/A	#N/A	#N/A	#N/A	#N/A	#N/A	#N/A	#N/A
#N/A	#N/A	#N/A	#N/A	#N/A	#N/A	#N/A	#N/A	#N/A	#N/A	#N/A	#N/A	#N/A	#N/A
#N/A	#N/A	#N/A	#N/A	#N/A	#N/A	#N/A	#N/A	#N/A	#N/A	#N/A	#N/A	#N/A	#N/A
#N/A	#N/A	#N/A	#N/A	#N/A	#N/A	#N/A	#N/A	#N/A	#N/A	#N/A	#N/A	#N/A	#N/A
#N/A	#N/A	#N/A	#N/A	#N/A	#N/A	#N/A	#N/A	#N/A	#N/A	#N/A	#N/A	#N/A	#N/A
#N/A	#N/A	#N/A	#N/A	#N/A	#N/A	#N/A	#N/A	#N/A	#N/A	#N/A	#N/A	#N/A	#N/A
#N/A	#N/A	#N/A	#N/A	#N/A	#N/A	#N/A	#N/A	#N/A	#N/A	#N/A	#N/A	#N/A	#N/A
#N/A	#N/A	#N/A	#N/A	#N/A	#N/A	#N/A	#N/A	#N/A	#N/A	#N/A	#N/A	#N/A	#N/A
#N/A	#N/A	#N/A	#N/A	#N/A	#N/A	#N/A	#N/A	#N/A	#N/A	#N/A	#N/A	#N/A	#N/A

## Sheet: Layer 3_AD_up_DEG
This spreadsheet is derived from DEGs analysis by comparing gene expression between AD and CT from Layer 3. Column A indicates gene ID. Column B indicates the number of overlapping genes from four comparisons. Column G to column J indicates the log fold change of four comparisons.
Gene	contribution summary					logFC (e as base, cutoff >= 0.25)				adjusted p-value (Wilcoxon test, cutoff <= 0.05)
ID	overlap	AD1 vs CT1	AD2 vs CT2	AD1 vs CT2	AD2 vs CT2	Layer 3_up_logFC_AD1_CT1	Layer 3_up_logFC_AD2_CT1	Layer 3_up_logFC_AD1_CT2	Layer 3_up_logFC_AD2_CT2	Layer 3up_Adj.pval_AD1_CT1	Layer 3up_Adj.pval_AD2_CT1	Layer 3up_Adj.pval_AD1_CT2	Layer 3up_Adj.pval_AD2_CT2
ADGRG1	4	1	1	1	1	0.374378568056391	0.428486092421152	0.264922846525701	0.319030370890461	7.06106081648715e-24	2.49390985848403e-38	2.9926359983359e-23	4.7566051747309e-47
APLP1	4	1	1	1	1	0.252214335589464	0.446143285590974	0.364131937462521	0.558060887464031	1.3005238780357e-17	9.7495910799031e-66	1.2295449586146e-63	4.38658174997029e-183
APOC1	4	1	1	1	1	0.581404773017884	0.714188015284283	0.35486721138742	0.487650453653819	2.08729561628775e-55	2.26189593844918e-88	1.01512868164404e-40	1.50558359298099e-98
ATP2B4	4	1	1	1	1	0.270809719348941	0.522894587268177	0.370124128240472	0.622208996159708	1.95618985299402e-09	5.54447074972778e-60	1.50216166938323e-41	4.50971217546115e-161
BIN1	4	1	1	1	1	0.380279527329932	0.252338398036835	0.384790189629511	0.256849060336414	2.73729544090784e-28	2.21277150783607e-14	9.12277486006464e-53	1.90258006558091e-33
C1QB	4	1	1	1	1	0.36586094765391	1.06942286107605	0.284873875676169	0.988435789098312	7.4600147096703e-23	3.15134262800262e-134	2.33052068496253e-29	1.62423283702043e-255
C3	4	1	1	1	1	0.399824379775327	0.71333022089852	0.302479361202392	0.615985202325586	1.77710412154889e-29	1.64800921663103e-82	2.29113380956436e-37	1.42998212318999e-142
CACNA1E	4	1	1	1	1	0.265208388346	0.359686118064528	0.264358975443647	0.358836705162175	3.88421501347606e-12	1.57216522013236e-30	6.36317215620942e-28	6.74413238051909e-71
CD74	4	1	1	1	1	0.827758710376041	0.755123381675322	0.427996105185275	0.355360776484556	1.88955123734866e-88	1.7462099433435e-90	1.14664490234251e-57	8.24996040844763e-57
CRYAB	4	1	1	1	1	0.603723043766293	1.1308283548428	0.539119189894064	1.06622450097057	7.29385122765819e-72	2.17124580148038e-181	1.29607130826158e-109	0
CTXN1	4	1	1	1	1	0.395769023678174	0.659222324770299	0.31843028432254	0.581883585414665	4.24856747136253e-35	2.73373184621036e-105	3.87475215709369e-42	1.67577067637762e-175
EDIL3	4	1	1	1	1	0.314622611524407	0.371640618655733	0.278453166265347	0.335471173396674	1.0825371919372e-18	1.80900820856755e-28	7.30283730378165e-30	2.26293958642881e-52
GABRA5	4	1	1	1	1	0.450281990018235	0.478339277600858	0.437415350564048	0.465472638146671	5.90336582311221e-37	1.96327114950981e-49	2.89260841964914e-73	1.87993961266555e-108
GDA	4	1	1	1	1	0.429435404390766	0.3763793319937	0.332796963742075	0.279740891345008	8.23054723101877e-32	7.62521546229262e-29	1.05676384922731e-36	1.17115866105479e-35
GFAP	4	1	1	1	1	0.626153420016174	0.72965181629094	1.31131533253539	1.41481372881015	5.04991439369565e-151	3.11200020148522e-192	0	0
GRIA1	4	1	1	1	1	0.293500747745618	0.309428367665297	0.288633569173329	0.304561189093007	1.32399165708684e-14	3.37611793053631e-22	1.15730185636908e-30	1.06279271833249e-50
HPCA	4	1	1	1	1	0.335876711112763	0.401515197369286	0.251290936238216	0.31692942249474	5.27979175338481e-15	9.45291364810507e-34	7.63063834627917e-16	1.78123804669266e-46
HPCAL4	4	1	1	1	1	0.43737196850685	0.686731591911751	0.315735989240564	0.565095612645466	9.63303991698272e-36	4.17142646997006e-104	4.92097066180166e-36	7.36511383539118e-158
LY6H	4	1	1	1	1	0.437698984197447	0.498003510439631	0.343410576875863	0.403715103118047	7.88930668132699e-44	6.23293822335012e-70	9.03677193159523e-52	5.6786141137658e-100
MAPK1	4	1	1	1	1	0.386288681414921	0.58712108173242	0.264895411970756	0.465727812288256	6.87080610287329e-29	9.86328204518972e-87	1.67273789729975e-25	9.88351986320518e-119
MMD	4	1	1	1	1	0.476492655508429	0.543766682479131	0.405019926312911	0.472293953283612	5.0953927883841e-39	1.22536428543981e-67	6.19634534681528e-59	1.15739267486926e-118
NCAM2	4	1	1	1	1	0.278345377226352	0.375380809784741	0.279614345831045	0.376649778389434	1.82615733215098e-11	7.01336310906052e-33	4.73291266369226e-27	6.63981902377644e-75
NPTX1	4	1	1	1	1	0.42295783344474	0.74486932736003	0.262899912940192	0.584811406855482	1.77436179587184e-38	2.12532203374889e-117	6.2750515301937e-27	3.49699433436709e-171
PEA15	4	1	1	1	1	0.507824261447794	0.825339918535526	0.375338449413168	0.6928541065009	1.84200638470265e-84	1.62966712015472e-180	5.79284216948788e-92	0
PEG10	4	1	1	1	1	0.604791526889672	0.418688899925003	0.555925313685894	0.369822686721225	7.14406890799122e-63	5.86344022691808e-37	5.11915897997043e-102	2.22295707994981e-65
PGRMC1	4	1	1	1	1	0.316802736649188	0.35239538932168	0.317682142650216	0.353274795322708	3.51986273214931e-20	4.37421367091069e-29	1.92573512326262e-37	3.9353329761254e-60
PLPPR4	4	1	1	1	1	0.400313570550666	0.53815178566617	0.377003799733176	0.51484201484868	3.68052695876519e-26	3.7216784273981e-62	2.67866337531642e-49	1.01308316446239e-128
PMP2	4	1	1	1	1	0.50666669499079	0.460206514170083	0.462734082273192	0.416273901452485	2.3721714245401e-41	1.86989468427081e-40	2.11240710814642e-66	8.77229997887651e-73
PRKCG	4	1	1	1	1	0.250191058551368	0.484342442523717	0.329396961849495	0.563548345821845	3.4825319829739e-09	1.05608545001078e-46	3.11760604266991e-39	5.73092556029043e-130
SCN3B	4	1	1	1	1	0.34673746964842	0.454374485392049	0.352587683053531	0.46022469879716	8.81341459448203e-26	5.49645498651765e-53	2.92960305413905e-47	1.42219362905372e-105
SLC17A7	4	1	1	1	1	0.406351819390486	0.503615039935881	0.491140315665641	0.588403536211036	7.14423464208721e-59	9.99599434817178e-106	2.96809571338554e-130	1.21910873288542e-242
SNCA	4	1	1	1	1	0.26353344931446	0.387332261814153	0.40593926643533	0.529738078935022	1.69209486649294e-11	1.02736861720781e-39	3.96507962890021e-56	7.46995931839951e-137
STUM	4	1	1	1	1	0.329851062651799	0.384474416821218	0.30509264926845	0.359716003437869	9.84239269147424e-24	1.675152088385e-42	1.31776714457646e-45	1.71535156543021e-92
STX1A	4	1	1	1	1	0.360735637764343	0.294420927824137	0.340881532244907	0.274566822304701	6.31113276443868e-23	1.4967436095545e-18	3.2944941713735e-39	3.61819675801208e-36
SYN2	4	1	1	1	1	0.369586585653716	0.528207581682079	0.503588993599688	0.662209989628052	1.51720542604625e-33	3.52207995722204e-82	7.399737648777e-99	3.42828279540838e-214
SYP	4	1	1	1	1	0.321757954783003	0.437841332139759	0.264710558654476	0.380793936011232	4.77595568312937e-34	1.36290197745899e-77	5.41300122099254e-42	1.35098257567655e-121
TIMP2	4	1	1	1	1	0.456664268165957	0.425401031348287	0.353035205003138	0.321771968185468	3.34780370932342e-37	2.20052963383949e-40	1.57546615369551e-42	1.55165341668892e-50
TMEM132A	4	1	1	1	1	0.286949144790828	0.384921151633385	0.293283160201585	0.391255167044143	1.69718563584796e-12	4.10697603904927e-32	6.15314258493681e-29	1.3627907715045e-73
AEBP1	3	0	1	1	1	0	0.253406303376466	0.317576097461159	0.368405228072929	0	3.33535046399645e-15	5.00750432859887e-82	4.52664987369906e-116
APP	3	1	1	0	1	0.252340903695444	0.279960849999798	0	0.2612661459396	2.14293185614118e-23	3.18003301077241e-30	0	6.3504346851078e-53
AQP4	3	1	1	1	0	0.731643922734923	0.563743115131806	0.298761289055735	0	4.84225071902791e-86	3.76995459567758e-64	4.47928972985538e-34	0
ARPP19	3	1	1	0	1	0.250436826544574	0.490573406636919	0	0.392278147449034	1.43302961295815e-19	1.94626106437082e-85	0	1.77734008069321e-122
ATP1B2	3	1	1	1	0	0.415062098694729	0.321393637459702	0.2677952568307	0	6.17775373819169e-33	9.95305252527338e-23	3.51430707086945e-25	0
ATP8A1	3	0	1	1	1	0	0.281776227130873	0.250187137013617	0.290618450052939	0	2.09922490598368e-14	7.95205369406966e-23	3.87480309557108e-38
BAIAP3	3	0	1	1	1	0	0.304442776959055	0.429629364642623	0.558734426536956	0	1.02613960733118e-22	3.14268465885895e-65	7.10686569344047e-134
C1QC	3	1	1	0	1	0.277478086822042	0.683928790362736	0	0.622806629877566	2.17930360619105e-11	1.93231111451602e-73	0	6.34143383043613e-139
CAMK2D	3	0	1	1	1	0	0.408521734288826	0.277136859251049	0.471970271654034	0	1.10937680954276e-34	7.57768141414209e-26	1.84279410174125e-98
CAMKV	3	0	1	1	1	0	0.254115246245949	0.255082911985046	0.278069083537858	0	6.73468966906174e-13	1.54505621650446e-24	3.60029105604443e-36
CELF5	3	1	1	0	1	0.282366734709759	0.387645791325577	0	0.264125068444035	1.26042717910764e-11	1.22494435970027e-32	0	1.718731436318e-34
CLDN11	3	1	0	1	1	0.364770110429441	0	0.516729887085197	0.254825398375568	1.85406787065517e-22	0	2.37651488987404e-122	4.95066417244375e-50
CPNE6	3	1	1	0	1	0.417252917436831	0.501122218585143	0	0.318030650202969	2.70360874291903e-31	1.81211552451151e-55	0	5.46574209537365e-52
DDN	3	1	1	0	1	0.374472832736257	0.60094193288723	0	0.427543493710716	1.44201609300289e-25	1.88828660665635e-78	0	2.27109635066617e-91
DNAJB2	3	1	1	0	1	0.264323208094357	0.422099677372454	0	0.328094501480258	1.49947085777223e-12	6.25701209448812e-42	0	3.55714725313044e-55
FABP3	3	0	1	1	1	0	0.309893899230838	0.316662505736581	0.523422763205799	0	1.73756703938193e-17	1.97218246928753e-43	4.09483354078707e-130
FTL	3	1	1	0	1	0.319912776354043	0.886215856906714	0	0.571026519187278	9.26353012533968e-65	8.24848485103426e-203	0	0
GNAO1	3	1	1	0	1	0.291563878077633	0.341889084075069	0	0.261325088994448	1.92351363529592e-20	2.96286422158322e-32	0	1.56414609496796e-38
GNG2	3	1	1	0	1	0.266799611829856	0.473270249422482	0	0.369849921742819	8.97795070086201e-11	7.40221394420097e-47	0	3.32208518173323e-62
HIPK2	3	1	1	1	0	0.640990358476131	0.254937709317839	0.401095750120131	0	3.75670621450936e-62	1.14713468376661e-13	7.2265830772519e-49	0
HLA-A	3	1	1	0	1	0.389477561037332	0.479200481833225	0	0.268269495423955	4.061845638176e-28	1.05246248133945e-42	0	1.42858117416919e-28
HLA-B	3	1	1	0	1	0.285849440150064	0.645892456153451	0	0.265117763207376	3.02899535987735e-12	2.39074063399718e-72	0	2.5681425702428e-29
HLA-DRA	3	1	1	1	0	0.454357548091386	0.394118314486012	0.274198155991466	0	3.76992063631933e-36	2.57330952141628e-34	1.86973629924546e-27	0
ID4	3	1	1	1	0	0.601577182041755	0.395474737644916	0.343326300949935	0	3.86033895004313e-57	1.52042548161994e-34	6.11992564498892e-37	0
LINGO1	3	0	1	1	1	0	0.338555151987558	0.261755377725653	0.360010722443852	0	3.5504859804586e-23	3.90955096564094e-24	2.61051237673203e-58
MARCKSL1	3	1	1	1	0	0.464580341984954	0.311913455077243	0.266306619433067	0	7.22331645356627e-35	4.01204131249889e-16	7.41026701567041e-21	0
MT-ND3	3	1	1	1	0	0.859391788414335	0.753312341561368	0.254299497654308	0	2.81092947034465e-177	5.04605811766668e-204	7.67772187067088e-176	0
MTRNR2L1	3	1	1	1	0	3.44095283996333	0.375352940891162	2.87554857972274	0	6.5741198490883e-181	2.71420658206185e-32	0	0
NPTXR	3	1	1	0	1	0.543839657088218	0.970017160210489	0	0.661303852836459	5.39482026370771e-61	1.62631665580689e-163	0	2.22202700530221e-221
NSMF	3	1	1	1	0	0.516860618997474	0.281698756193577	0.257149876616845	0	7.25786317670227e-56	3.18972857309056e-17	6.80593937325088e-29	0
PDE2A	3	1	1	0	1	0.265937061672366	0.409795339903713	0	0.279215416824699	3.19897156541341e-12	5.05374223572504e-35	0	8.26002541712061e-35
PGM2L1	3	1	0	1	1	0.277158629775749	0	0.3840135881217	0.283284028846194	7.22289066329222e-13	0	1.14289384658369e-50	1.20378657358413e-40
PLP1	3	1	0	1	1	1.04007137734571	0	1.58680564259336	0.658155605834613	2.42824462868905e-136	0	0	2.16529950075821e-132
PTMA	3	1	1	1	0	0.395636743851565	0.305929672866904	0.335922788780997	0	2.26291374639094e-41	1.025326403811e-30	9.05941115887112e-54	0
QKI	3	1	1	1	0	0.662960130433843	0.28017260089551	0.373602331269887	0	8.8877327711652e-76	4.46372283619397e-14	5.00966848670046e-55	0
RPLP0	3	1	1	0	1	0.317402760622229	0.497987476880669	0	0.304992842276425	1.55862234494011e-21	2.99695645508164e-54	0	5.05501248709348e-47
RPS19	3	1	1	0	1	0.3551098605818	0.555921939008466	0	0.278585442237912	6.9644488120411e-37	4.02761167656996e-92	0	3.538072128721e-61
RPS2	3	1	1	0	1	0.33171323066053	0.487823351538894	0	0.302926297727536	1.23258581115626e-27	6.73496117196124e-67	0	5.10122293889971e-59
SEPTIN3	3	1	1	0	1	0.29371764396163	0.335203892242421	0	0.25292146625166	9.11710595315588e-21	3.01951643057589e-35	0	1.33641736412124e-41
SERF2	3	1	1	0	1	0.268284585755269	0.469469039782572	0	0.346373119760669	1.61851164196908e-17	5.42626241677106e-68	0	6.01259632098468e-85
SLC25A22	3	1	0	1	1	0.348854982182462	0	0.369271422501981	0.261226657928449	4.14301715909673e-18	0	1.38826226506206e-42	1.24030326531092e-35
SLC8A2	3	1	1	0	1	0.300196882124302	0.42893355445142	0	0.31101387511289	2.06391830290143e-13	2.20546933888955e-38	0	9.28618633016607e-45
SLIT1	3	1	1	1	0	0.381995679319206	0.293607699262106	0.305136581543583	0	1.03814932300596e-23	4.36307872569723e-19	2.20665785989811e-30	0
TSPAN3	3	1	1	0	1	0.311768969729924	0.43192796568	0	0.265399580030782	3.91988007622885e-23	1.64746602085083e-55	0	3.50696275757036e-46
TTC9B	3	1	0	1	1	0.260593612901054	0	0.396077142225342	0.319751048158151	7.08873975667508e-11	0	4.56972931676015e-52	2.20645851819532e-49
TUBA1A	3	0	1	1	1	0	0.453099645590174	0.478118421672588	0.738781916448126	0	1.64552179743759e-88	4.18117451309553e-115	4.77798578734023e-296
YWHAZ	3	0	1	1	1	0	0.329296658525224	0.393370843651064	0.607785600450896	0	4.40371226915479e-49	5.88543752013207e-77	1.98989291892227e-227
A2M	2	1	0	1	0	0.465129036895059	0	0.259834183041836	0	6.43447243793504e-33	0	1.18968995469957e-18	0
ABCA2	2	1	0	1	0	0.389736903047043	0	0.421924619247999	0	1.15526930322978e-26	0	1.61614817419e-58	0
ADD3	2	1	1	0	0	0.356144036569596	0.281237015566005	0	0	3.142095141945e-20	1.8591888296164e-15	0	0
ADGRB2	2	0	1	0	1	0	0.250776588523997	0	0.270006423921939	0	6.31613203325462e-12	0	1.44362206405003e-34
ADGRL3	2	0	1	0	1	0	0.29386255208598	0	0.258777045767498	0	7.80246924365475e-18	0	8.00543693195753e-36
ADIPOR1	2	0	1	0	1	0	0.278040312539528	0	0.269970600835699	0	1.82873804959433e-13	0	7.32249788896504e-35
AIF1	2	0	1	0	1	0	0.43995750776974	0	0.452779835448433	0	1.73221274463819e-42	0	6.45646706464803e-118
AK5	2	0	1	0	1	0	0.408319381532179	0	0.326665976879451	0	4.13866756191855e-40	0	1.13578752957958e-54
AKAP5	2	0	1	0	1	0	0.311568106208211	0	0.323046911190617	0	2.54260929717281e-25	0	2.57640357525235e-69
AMER2	2	1	0	1	0	0.448200479551831	0	0.287393056278433	0	1.63543418788904e-36	0	7.05673083112382e-30	0
ANLN	2	1	0	1	0	0.279089936810894	0	0.338244411583423	0	9.63242508560625e-19	0	3.65783138487155e-87	0
ANO3	2	0	1	0	1	0	0.311821921578236	0	0.298542759756446	0	1.93269919183428e-21	0	4.79094688204457e-52
ANXA11	2	0	1	0	1	0	0.304557389611231	0	0.260687684055634	0	3.21416096301445e-19	0	1.28883491281198e-32
AP1S1	2	0	1	0	1	0	0.288853157577526	0	0.383075758357503	0	9.15666675369045e-17	0	6.15566238177877e-68
APLNR	2	0	1	0	1	0	0.369604884901927	0	0.468308097774988	0	1.11201601955969e-37	0	8.47595899496259e-191
APOD	2	1	1	0	0	0.569062943730473	0.635869623459025	0	0	2.20257503905365e-55	2.65618042309201e-71	0	0
APOE	2	1	1	0	0	0.93433757251506	0.699462074579673	0	0	1.753376290194e-156	6.20414355298475e-131	0	0
AQP1	2	0	0	1	1	0	0	0.295739453241279	0.308965850384289	0	0	9.58399527759886e-74	3.98499235590649e-89
ARHGDIA	2	1	1	0	0	0.301247118294213	0.271578234836321	0	0	2.39064743290361e-16	1.20361944553141e-16	0	0
ARPP21	2	0	1	0	1	0	0.315795017009594	0	0.388399569210636	0	3.0531737721515e-20	0	1.63925764972782e-69
ATP1A2	2	1	1	0	0	0.650395702763672	0.423896939550145	0	0	2.83173153138005e-88	3.83302419091459e-43	0	0
ATP6V1H	2	0	1	0	1	0	0.360335268936111	0	0.51705207977092	0	8.9335374705614e-34	0	5.29883643640554e-125
AUXG01000058.1	2	1	1	0	0	0.366579853703464	0.33103320654361	0	0	2.2559022345416e-22	7.27751771993488e-23	0	0
B2M	2	1	1	0	0	0.476001661469463	0.631691319948648	0	0	5.86179415558801e-44	2.06461580797173e-82	0	0
BCAN	2	1	1	0	0	0.315446484536247	0.288149289701211	0	0	1.98788187984364e-14	1.99864354283558e-15	0	0
BCAS1	2	1	0	1	0	0.548909178302198	0	0.359119661235896	0	4.50857347070363e-52	0	8.32769762580304e-46	0
BLOC1S1	2	1	1	0	0	0.265780962080509	0.253662845194189	0	0	3.64354673490305e-10	9.04555910441745e-13	0	0
BST2	2	0	1	0	1	0	0.338868888012398	0	0.308203746758921	0	1.3323913065397e-27	0	1.99864086595986e-58
BTBD2	2	1	1	0	0	0.251937955218765	0.302327076433291	0	0	1.83690588200959e-08	6.14463425446959e-16	0	0
C14orf132	2	0	1	0	1	0	0.252047533895606	0	0.260569373863073	0	8.12904874174693e-13	0	1.86409821238776e-31
C1orf115	2	0	1	0	1	0	0.350165435316518	0	0.285462360001792	0	1.17227800618193e-25	0	1.6963047235367e-39
C1QA	2	0	1	0	1	0	0.836011766712959	0	0.746871999060179	0	7.40991869147549e-103	0	7.12123677525833e-189
C1QTNF4	2	0	1	0	1	0	0.4020248852694	0	0.322311331929028	0	3.16481968374709e-36	0	1.07767783334432e-50
C1R	2	0	1	0	1	0	0.374141374250972	0	0.412497003934829	0	5.22539379508707e-33	0	3.14597079863929e-112
C1S	2	0	1	0	1	0	0.309530756878289	0	0.321312305872069	0	7.95195389092796e-25	0	6.96543245434128e-74
CA2	2	1	0	1	0	0.32352925452252	0	0.28017477243909	0	2.52059067146776e-19	0	5.01584242951267e-32	0
CACNA2D1	2	0	1	0	1	0	0.314901751144955	0	0.306324070670282	0	1.0231956437543e-20	0	1.50751364225773e-48
CACNG3	2	0	1	0	1	0	0.32623057830641	0	0.340360097385688	0	4.69042621716525e-25	0	5.13048867650844e-61
CACYBP	2	0	1	0	1	0	0.278617399355375	0	0.388548235528312	0	1.93307155863781e-17	0	2.01653154925874e-75
CALR	2	0	1	0	1	0	0.602941043989006	0	0.529065242714953	0	1.11206869406304e-74	0	3.27400002486417e-120
CAMK1	2	0	1	0	1	0	0.290756934618761	0	0.340553605691872	0	9.97931301753378e-20	0	1.68846318148823e-67
CAMK2N1	2	0	1	0	1	0	0.301134972926837	0	0.489690920290685	0	2.74047391145443e-52	0	5.25346779988021e-207
CANX	2	1	1	0	0	0.366456368920145	0.397306969908932	0	0	6.0569627060096e-31	3.21193482756275e-42	0	0
CAP2	2	0	1	0	1	0	0.304224427586128	0	0.342406531515436	0	5.09193692564116e-17	0	2.29905920618881e-51
CAPZB	2	1	1	0	0	0.294509518110081	0.302150649580666	0	0	1.95387123300672e-12	2.37374179902988e-21	0	0
CBX6	2	1	1	0	0	0.251597517509855	0.293652491092083	0	0	2.23054429691812e-10	3.60012825618785e-18	0	0
CCDC92	2	1	1	0	0	0.289211154231796	0.362495434709406	0	0	1.60372012762874e-16	3.26353205995095e-31	0	0
CCT5	2	0	1	0	1	0	0.301266606499663	0	0.261630428828	0	3.30779946485843e-20	0	1.12002111127941e-36
CD24	2	1	0	1	0	0.266178931410011	0	0.266793289604867	0	6.0649675256647e-16	0	2.39418700767353e-45	0
CD44	2	0	1	0	1	0	0.274648352668424	0	0.346673498516894	0	4.84417803675159e-21	0	4.36200634157127e-119
CD63	2	1	1	0	0	0.326639916683347	0.494638600216285	0	0	1.34950304022871e-21	3.036851800921e-60	0	0
CD99	2	1	1	0	0	0.308159083724738	0.48391531191093	0	0	8.69973817238652e-17	4.95794837872554e-45	0	0
CDIP1	2	1	1	0	0	0.257046544990841	0.254806156334685	0	0	7.5136487729576e-12	1.54404384503639e-15	0	0
CDK18	2	1	0	1	0	0.285085486500172	0	0.35449750818008	0	1.63553511215929e-15	0	1.16944877610878e-65	0
CERCAM	2	1	0	1	0	0.468238573509286	0	0.493432419673658	0	2.35605622297717e-40	0	1.60632648194901e-99	0
CHI3L1	2	0	1	0	1	0	1.28687732743387	0	1.53317855976616	0	3.12393427510108e-166	0	0
CHI3L2	2	0	1	0	1	0	0.342104389953455	0	0.375966902103309	0	3.04087264458277e-31	0	7.86663920490391e-135
CHORDC1	2	0	1	0	1	0	0.270159244818342	0	0.27524768569618	0	1.091536855171e-18	0	6.11802282159702e-50
CHRM1	2	0	1	0	1	0	0.251810754591503	0	0.258267974525857	0	8.32679184427857e-14	0	5.22730688312185e-36
CLDND1	2	1	0	1	0	0.396240368637938	0	0.440034179855173	0	8.14303564624763e-26	0	1.40792488599883e-62	0
CLSTN2	2	1	0	1	0	0.402596387826544	0	0.467065272770992	0	1.57775287453004e-29	0	2.39729455492751e-85	0
CNDP1	2	1	0	1	0	0.302287005343384	0	0.36349528891831	0	1.77696072453798e-18	0	6.40252811519658e-81	0
CNIH2	2	0	1	0	1	0	0.264982946711005	0	0.250938983001673	0	2.92211339751002e-14	0	6.32586723348445e-31
CNP	2	1	0	1	0	0.584585415223995	0	0.559456804675133	0	6.7629652876808e-56	0	1.24844721061433e-94	0
CNTN2	2	1	0	1	0	0.359071798793736	0	0.371536430924126	0	4.97997555984672e-25	0	4.89111951475642e-58	0
CORO1A	2	0	1	0	1	0	0.378467509559904	0	0.4247376295849	0	2.63572984777571e-35	0	1.50651219949079e-100
CRELD1	2	0	1	0	1	0	0.267914049640222	0	0.346890843962765	0	1.71786237138907e-15	0	4.15491008284764e-63
CSF1R	2	1	1	0	0	0.311343343285517	0.251972176891764	0	0	6.66974395967836e-20	1.08166745019103e-16	0	0
CTSB	2	0	1	0	1	0	0.536105907756057	0	0.399548559453346	0	2.81390593705038e-80	0	1.23457851853197e-98
CTSD	2	1	1	0	0	0.415871656528433	0.432884979837962	0	0	8.57845214637011e-36	5.85382166019607e-52	0	0
CX3CL1	2	0	1	0	1	0	0.287714537157484	0	0.263564076925201	0	7.2057521661645e-18	0	3.79496082404515e-37
CYBA	2	0	1	0	1	0	0.36251288154019	0	0.278990147807938	0	6.63514008108986e-32	0	2.55055683125008e-44
DAAM2	2	1	0	1	0	0.390321176793322	0	0.351885888885008	0	8.69625268911826e-33	0	3.07032898050124e-58	0
DBI	2	1	1	0	0	0.591561243411062	0.614894805457897	0	0	6.78378756903418e-69	1.8597441270974e-77	0	0
DBNDD2	2	1	0	1	0	0.376978856255865	0	0.464550917040181	0	1.52634931940103e-23	0	4.66895040089213e-68	0
DDIT4	2	1	1	0	0	0.353243284869702	0.369902425139001	0	0	8.06283499406791e-21	6.34685857496475e-32	0	0
DDR1	2	1	1	0	0	0.394531148240926	0.259650437306305	0	0	2.30689591103054e-26	3.81000143098128e-14	0	0
DDRGK1	2	0	1	0	1	0	0.312918644175193	0	0.354848118566398	0	4.71317383841764e-24	0	8.96936421882724e-70
DNAJA1	2	0	1	0	1	0	0.423880198942022	0	0.511352525679031	0	3.29255985264675e-43	0	3.89219586538872e-120
DNAJA4	2	0	1	0	1	0	0.451692197857944	0	0.519954542091272	0	2.08400251714509e-40	0	1.86451276629496e-113
DNAJB1	2	0	1	0	1	0	0.324970999040831	0	0.400458578192308	0	2.28298261785668e-21	0	1.37474278398516e-73
DNAJC12	2	0	1	0	1	0	0.290141771638451	0	0.336273852062594	0	1.11843065986499e-18	0	1.02882046310014e-66
DNAL4	2	0	1	0	1	0	0.279318873065386	0	0.272761586859014	0	4.62312223652357e-22	0	3.98725001653294e-59
DOC2A	2	0	1	0	1	0	0.288062202012069	0	0.347555364778298	0	3.38604622592233e-16	0	5.93959915984071e-55
DPP6	2	0	1	0	1	0	0.316539387032766	0	0.39127005285601	0	1.56961391213129e-21	0	3.95708173635741e-70
DTNA	2	0	1	0	1	0	0.532335427940254	0	0.280863428281659	0	6.67094198219812e-61	0	7.00386975428839e-39
DTNBP1	2	0	1	0	1	0	0.382759640750846	0	0.346653622938017	0	2.77824788491884e-34	0	7.51491049070994e-69
DYNLL1	2	0	1	0	1	0	0.257795323198205	0	0.418421705293501	0	8.08510449834838e-35	0	3.65174760959616e-150
EDNRB	2	1	0	1	0	0.456010245905888	0	0.459245439404828	0	1.65253007500491e-40	0	1.61468497746663e-95	0
EEF1A1	2	1	1	0	0	0.255532178749027	0.271809395614233	0	0	3.33959582262414e-52	4.90602146261274e-64	0	0
EEF1B2	2	1	1	0	0	0.266129583393845	0.302814852294034	0	0	3.84612346829433e-11	3.07512284189399e-18	0	0
EEF1G	2	1	1	0	0	0.31729254709361	0.317500941236859	0	0	2.82757676094263e-20	1.14114377328976e-22	0	0
EEF2	2	1	1	0	0	0.257114369821794	0.312949942589931	0	0	9.01154579136555e-18	5.2687126295011e-33	0	0
EFHD1	2	1	0	1	0	0.373046260693934	0	0.283500724555823	0	3.26553827435544e-25	0	1.71492205107467e-29	0
EIF5A	2	1	1	0	0	0.289985762363278	0.278479681342625	0	0	1.25498244893999e-15	1.46269538840188e-17	0	0
ELK1	2	0	1	0	1	0	0.369602642721811	0	0.333646451507009	0	5.59347098899351e-25	0	2.65149636826458e-48
ENPP2	2	1	0	1	0	0.317212414817484	0	0.415325494202806	0	6.77936659888647e-20	0	6.79831819332036e-105	0
EPB41L4B	2	0	1	0	1	0	0.267568148693689	0	0.277529213180029	0	2.42698643786972e-16	0	6.93671459939269e-47
EPHX1	2	1	1	0	0	0.274418456348582	0.263804690881649	0	0	2.32217909510122e-13	1.40150471526397e-15	0	0
ERBIN	2	1	0	1	0	0.432868717344194	0	0.357939450236001	0	1.2772012853931e-34	0	5.25111316918648e-49	0
ERMN	2	1	0	1	0	0.348100751278642	0	0.416617979905766	0	1.12513394585868e-23	0	6.04960197510565e-94	0
FABP7	2	0	1	0	1	0	0.369607224178974	0	0.26623385992264	0	4.16686896027595e-31	0	2.76123768732675e-38
FADS2	2	1	0	1	0	0.290057482939942	0	0.256001493718256	0	1.43551163639068e-14	0	5.13535988105713e-25	0
FAIM2	2	1	1	0	0	0.294799540220645	0.347885217155588	0	0	1.48551675524327e-30	7.28802261711653e-47	0	0
FAM107A	2	1	1	0	0	0.650451864680291	0.61417803962816	0	0	8.34229500186413e-124	9.95423596929474e-127	0	0
FAM171B	2	1	1	0	0	0.48302694665462	0.251386654902523	0	0	1.73154018393024e-45	8.20278262798474e-14	0	0
FAU	2	1	1	0	0	0.312829085903249	0.347571554549694	0	0	2.95381450418462e-29	2.21011440946095e-42	0	0
FBXL16	2	0	1	0	1	0	0.350957797589975	0	0.262808015733971	0	2.01627863077656e-41	0	1.85406662422204e-49
FCER1G	2	0	1	0	1	0	0.348261378359176	0	0.390971935331648	0	9.13555105031553e-29	0	1.82612815198985e-94
FCGBP	2	0	1	0	1	0	0.383526609981848	0	0.454409551251541	0	2.66459710625912e-36	0	1.3639558403369e-163
FCGR3A	2	0	1	0	1	0	0.29178786254512	0	0.394976824689438	0	3.11725604671677e-20	0	3.0369841151739e-100
FKBP1A	2	0	1	0	1	0	0.468476183945686	0	0.277248553159178	0	2.97589349472408e-53	0	3.90710944151458e-42
FXYD1	2	1	1	0	0	0.288698926514615	0.338978423516251	0	0	1.14060102602903e-14	7.10141429417502e-26	0	0
FXYD6	2	0	0	1	1	0	0	0.581060877901135	0.592922027267305	0	0	1.8567116787287e-131	8.86702660257358e-186
GABBR1	2	0	0	1	1	0	0	0.271995490068202	0.282762558752274	0	0	1.28910369722704e-28	1.18809470310813e-40
GABRB3	2	0	1	0	1	0	0.325790764716238	0	0.31504383741187	0	5.81473316965276e-23	0	5.15865564788446e-49
GALNT16	2	1	0	1	0	0.276535297749551	0	0.277610305134901	0	1.00426544582378e-12	0	2.43733771686853e-28	0
GALNT17	2	1	1	0	0	0.336204242938555	0.279347510718532	0	0	1.73401557223687e-18	7.01291156070479e-17	0	0
GAREM2	2	1	0	1	0	0.306249705161245	0	0.333099153371188	0	4.49182507548178e-22	0	3.45763397849563e-71	0
GATB	2	0	1	0	1	0	0.316872361822048	0	0.337818410849489	0	7.17135501579248e-23	0	1.18089627418513e-64
GJA1	2	1	1	0	0	0.909366705114493	0.696856349857223	0	0	3.06074125557642e-114	4.38300447656018e-84	0	0
GNAL	2	0	1	0	1	0	0.35884649745224	0	0.424917796640056	0	4.94199529830293e-29	0	9.14464447157966e-98
GP1BB	2	1	1	0	0	0.297150175790931	0.289807663878257	0	0	4.8264975642093e-15	2.73650928836831e-22	0	0
GPM6A	2	1	1	0	0	0.277316440771267	0.318786530611447	0	0	2.56812365018783e-42	4.68719496100571e-66	0	0
GPM6B	2	1	1	0	0	0.616633115138539	0.378194370319271	0	0	3.41040630364722e-101	1.41840477838823e-52	0	0
GUK1	2	1	1	0	0	0.300588723145256	0.283044000365705	0	0	2.48599787444742e-24	1.11799811991092e-25	0	0
HHATL	2	1	0	1	0	0.387964052995544	0	0.325117241763048	0	3.49748196347728e-27	0	7.41954950208681e-41	0
HLA-C	2	1	0	1	0	0.451894041841811	0	0.474599788204051	0	4.60854565649231e-31	0	1.60379021768065e-65	0
HLA-DPA1	2	1	1	0	0	0.25666543802744	0.254047534562273	0	0	2.69130251978697e-15	1.87727732388431e-17	0	0
HLA-DPB1	2	1	0	1	0	0.32233584291287	0	0.273897232479342	0	1.08227352454503e-26	0	6.38515897691806e-43	0
HMGCS1	2	0	0	1	1	0	0	0.269520492923948	0.283751189579214	0	0	5.33255875122186e-29	5.04645641890873e-45
HNRNPC	2	0	1	0	1	0	0.379784655459976	0	0.300918869776704	0	5.36214751218192e-36	0	2.20525832217976e-48
HNRNPK	2	1	1	0	0	0.271426244707964	0.262626917772703	0	0	1.18021561086794e-13	1.40499913808154e-18	0	0
HOPX	2	0	1	0	1	0	0.610543973394421	0	0.422490810980628	0	8.75905006044855e-118	0	2.32964127437472e-137
HPCAL1	2	0	1	0	1	0	0.626626960951667	0	0.371338601402876	0	2.54745114055588e-76	0	2.1624850669454e-65
HSP90AA1	2	0	1	0	1	0	0.580887082718636	0	0.659324267638445	0	3.64051867005354e-162	0	0
HSP90AB1	2	0	1	0	1	0	0.389494528651498	0	0.533281781226025	0	1.23861446193437e-91	0	2.09805131242772e-258
HSP90B1	2	0	1	0	1	0	0.645112903573591	0	0.711533483631175	0	2.45915609780766e-96	0	5.59513098489917e-215
HSPA1A	2	0	1	0	1	0	0.673672028064377	0	0.738074965173539	0	1.50990344573667e-86	0	3.3761493438571e-198
HSPA2	2	1	0	1	0	0.35897504454886	0	0.280425880487535	0	9.90684520245816e-24	0	5.02396967289734e-31	0
HSPA4	2	0	1	0	1	0	0.290376429706712	0	0.285619653600958	0	5.26343764299212e-18	0	3.92898145827493e-42
HSPA5	2	0	1	0	1	0	0.436143545174691	0	0.619680690616399	0	3.69003550622758e-38	0	3.73714166808304e-148
HSPB1	2	0	1	0	1	0	0.996151559848749	0	1.02856818259159	0	4.9659982611793e-181	0	0
HSPB8	2	0	0	1	1	0	0	0.291366822825436	0.356427672078056	0	0	4.83509124380419e-34	4.18561955506364e-70
HSPD1	2	0	1	0	1	0	0.380936126778657	0	0.35014597679279	0	1.97945998852339e-30	0	1.03765598147824e-56
HSPE1	2	0	1	0	1	0	0.400295283961139	0	0.294223913654774	0	1.24065831519987e-36	0	3.67145347370142e-43
HSPH1	2	0	1	0	1	0	0.487892014217212	0	0.764825482523725	0	3.63829228590559e-61	0	1.93736373423368e-231
ICAM5	2	0	1	0	1	0	0.425484804379523	0	0.454700603513352	0	3.74047002334162e-39	0	5.31741005075695e-99
IDS	2	1	1	0	0	0.34131138896785	0.377558660963521	0	0	9.95471366710403e-68	3.0814569771813e-98	0	0
IFITM3	2	0	1	0	1	0	0.50721828414847	0	0.489849996370891	0	3.96273112651352e-56	0	7.96038756461146e-111
IGFBP5	2	1	1	0	0	0.320658125134283	0.267647744189422	0	0	7.06827771953885e-19	2.90653652786752e-17	0	0
IGFBP7	2	1	1	0	0	0.275092966437515	0.354113325742948	0	0	1.39090637693197e-06	3.29419289136061e-20	0	0
ITGB2	2	0	1	0	1	0	0.380900590021074	0	0.334163060013931	0	6.71396964394503e-38	0	2.57657286862905e-75
ITM2C	2	1	1	0	0	0.349321703695481	0.406188113885976	0	0	3.31757089272346e-43	3.79950142352961e-62	0	0
ITPKB	2	1	0	1	0	0.392303156876102	0	0.352631706955582	0	3.87859333025068e-29	0	2.10094054028253e-47	0
JPT1	2	0	1	0	1	0	0.303503477717682	0	0.417478598894977	0	4.22256943367553e-21	0	5.54848048242765e-90
JUN	2	0	1	0	1	0	0.349738583841793	0	0.408467306216822	0	1.39861536187178e-27	0	2.1441785257314e-84
JUND	2	1	1	0	0	0.510570599978821	0.383915309433728	0	0	2.61803192963738e-55	2.43765518436644e-40	0	0
KCNAB2	2	0	1	0	1	0	0.258930697387345	0	0.269604213026763	0	1.06910184429075e-18	0	1.67581373571538e-42
KCNG1	2	0	1	0	1	0	0.313420957900546	0	0.302632676643432	0	2.86196466123406e-32	0	7.77839755737879e-84
KCNIP2	2	0	1	0	1	0	0.411783459242021	0	0.353334733104195	0	1.1750767083405e-36	0	4.67881966537181e-61
KCNK1	2	0	1	0	1	0	0.351670290614926	0	0.382501619185899	0	7.26106738585432e-26	0	4.35549109619836e-71
KCTD12	2	1	1	0	0	0.276806229445331	0.338511689451481	0	0	9.9549155425857e-15	1.55778001121581e-27	0	0
KCTD4	2	0	1	0	1	0	0.321014847583593	0	0.30463141668897	0	4.79887260614577e-30	0	1.36184210175166e-72
KIAA0930	2	1	1	0	0	0.293246873273641	0.305236672357733	0	0	2.49031501425676e-17	1.63553895206034e-22	0	0
LAMP2	2	1	0	1	0	0.361287782839021	0	0.317844119672059	0	6.08643963028209e-23	0	1.73373123453909e-36	0
LAMP5	2	0	1	0	1	0	0.55248021865771	0	0.776239112245991	0	4.84974020532071e-60	0	6.80183936729586e-212
LAPTM5	2	1	1	0	0	0.257218514717398	0.387098042349444	0	0	1.63874111120499e-13	1.51182765363427e-33	0	0
LARGE1	2	0	0	1	1	0	0	0.254741059204163	0.291366647611988	0	0	4.4841066044963e-31	1.95724946569349e-55
LDHA	2	0	1	0	1	0	0.392151994209082	0	0.523441582606078	0	1.97131826688607e-40	0	2.22084062749964e-130
LHPP	2	1	0	1	0	0.250689600547631	0	0.262301787190257	0	3.01180888463311e-11	0	4.32861976248886e-32	0
LINC02607	2	0	1	0	1	0	0.340156530396404	0	0.284846431307879	0	3.65042051680091e-28	0	1.27204698758037e-49
LPAR1	2	1	0	1	0	0.368939796937034	0	0.3335013769309	0	9.97408860004211e-33	0	2.29048047929261e-64	0
LRPAP1	2	0	0	1	1	0	0	0.253224887841921	0.289126418579132	0	0	2.34475774927713e-26	6.31997494911741e-41
MAG	2	1	0	1	0	0.27771072171075	0	0.391345096806904	0	7.45873600134237e-16	0	3.82188708627847e-88	0
MAL2	2	0	1	0	1	0	0.254149011045185	0	0.326551159725642	0	5.97757415690775e-16	0	3.45322176362095e-63
MAN1A1	2	0	1	0	1	0	0.351223423579364	0	0.270388146484964	0	2.75914452253873e-34	0	4.2760968828745e-49
MAOB	2	0	1	0	1	0	0.302497469591495	0	0.300642647413282	0	4.54834102227738e-19	0	1.29799279518028e-46
MAP2	2	1	1	0	0	0.283489874211653	0.441401100758425	0	0	1.26335670946591e-28	1.46888869419764e-78	0	0
MAP2K1	2	0	1	0	1	0	0.361150673213937	0	0.305385655425944	0	5.9194261232732e-27	0	6.32483299172159e-43
MAP4K4	2	1	0	1	0	0.539289678488459	0	0.413903924698894	0	3.07790215880757e-51	0	5.3733796757842e-62	0
MAPK8IP1	2	1	1	0	0	0.368902255226023	0.336809316035553	0	0	4.68998442462531e-25	3.08854868348385e-26	0	0
MAPRE2	2	0	1	0	1	0	0.293863474854414	0	0.356700582484769	0	5.27793269077837e-19	0	2.6942107511315e-61
MARCKS	2	1	1	0	0	0.419901208711396	0.263080951372249	0	0	8.20082996015865e-33	2.69699850675755e-14	0	0
MAST3	2	0	1	0	1	0	0.487216647820532	0	0.368393001196656	0	2.92746182724366e-67	0	1.37977786889257e-83
MAT2A	2	1	0	1	0	0.31578899903013	0	0.267891188588151	0	1.82604609179486e-18	0	2.42645751007889e-27	0
MAZ	2	1	1	0	0	0.353437667895122	0.275005632542432	0	0	2.43784152604774e-20	2.29227939114437e-16	0	0
MBOAT7	2	0	1	0	1	0	0.324914820843574	0	0.314435995128394	0	9.54422085680656e-25	0	3.06792820000818e-50
MBP	2	1	0	1	0	1.32925137471027	0	1.19953412515321	0	2.3441905185697e-174	0	0	0
MEF2D	2	0	1	0	1	0	0.272681766808051	0	0.258754160328429	0	4.51217845517224e-16	0	6.90033742394376e-35
MEG3	2	0	1	0	1	0	0.295104615171114	0	0.329749433205569	0	2.07151948282757e-38	0	2.23986594358258e-92
MEIS3	2	0	1	0	1	0	0.399749159903003	0	0.354229393682357	0	4.42571566094627e-38	0	8.74324777990797e-71
METRN	2	1	1	0	0	0.57525245804987	0.344495926283704	0	0	1.73233507148773e-51	4.0429803859059e-26	0	0
MFSD4A	2	0	1	0	1	0	0.355428461088587	0	0.295561939127828	0	8.02155241308375e-27	0	1.04772700009518e-42
MGAT3	2	0	1	0	1	0	0.251046031558516	0	0.261482271126113	0	1.49573836984892e-14	0	3.22328232639465e-40
MGST1	2	0	1	0	1	0	0.715261567857267	0	0.446391040951762	0	1.12326355328523e-88	0	6.27605985299912e-86
MIF	2	0	1	0	1	0	0.253338781431809	0	0.431495416753784	0	3.68878311275547e-31	0	4.33841891396429e-147
MOB1B	2	0	1	0	1	0	0.49605245226186	0	0.408984615337616	0	4.06844136122849e-50	0	7.64437821341694e-81
MOBP	2	1	0	1	0	0.569682958879967	0	0.643673452216957	0	1.56202429225201e-52	0	6.80042126002565e-146	0
MRTFB	2	0	1	0	1	0	0.326718410651863	0	0.333534056723082	0	7.68299856732924e-22	0	8.2344403513567e-51
MRVI1	2	0	1	0	1	0	0.250162055614358	0	0.254663176798431	0	5.48523711544772e-16	0	2.87304954700515e-42
MT-ATP6	2	1	1	0	0	0.798653289647832	0.65881561937647	0	0	4.3177841405679e-177	3.34425531959807e-200	0	0
MT-ATP8	2	1	1	0	0	0.786125916772266	0.717044785735987	0	0	8.07861353882016e-106	1.96178893511884e-107	0	0
MT-CO2	2	1	1	0	0	0.543110262160123	0.396573508866171	0	0	1.1388791088939e-171	2.10507112875717e-170	0	0
MT-CO3	2	1	1	0	0	0.751517814949198	0.510204382751352	0	0	4.33538142078906e-177	8.48363683556685e-193	0	0
MT-CYB	2	1	1	0	0	0.847063831082989	0.776639379367081	0	0	4.48976444193448e-177	2.95390268881466e-204	0	0
MT-ND1	2	1	1	0	0	0.537460998594189	0.45701561132754	0	0	1.0611301873865e-163	3.17013472088135e-167	0	0
MT-ND2	2	1	1	0	0	0.644593326506278	0.50448519303239	0	0	5.93435614367272e-162	1.21593314586142e-160	0	0
MT-ND4	2	1	1	0	0	0.709326413678386	0.695672416755662	0	0	1.06277374778674e-176	1.09790302630117e-202	0	0
MT-ND4L	2	1	1	0	0	0.873478800778903	0.933370585591392	0	0	2.71030997232741e-146	2.1866467269317e-176	0	0
MT-ND5	2	1	1	0	0	0.688990083077892	0.748811454198238	0	0	6.41991255589934e-156	2.22678597163196e-183	0	0
MT-ND6	2	1	1	0	0	0.479369415093622	0.285321327309373	0	0	6.85717800914415e-38	1.03797222702134e-15	0	0
MTCH1	2	0	0	1	1	0	0	0.288390194524156	0.446797306787221	0	0	3.29504490571097e-38	1.08778398102074e-135
MTPN	2	1	1	0	0	0.36602250228972	0.382914218175121	0	0	1.25127790451577e-24	6.99685047708385e-34	0	0
MTRNR2L6	2	1	0	1	0	0.713827623420122	0	0.437287273251025	0	4.87506661565854e-82	0	9.43421490160489e-66	0
MTURN	2	1	1	0	0	0.46165273330497	0.387411202925088	0	0	2.15540762594394e-52	1.85161240355842e-41	0	0
MYL6	2	1	1	0	0	0.318124922406198	0.376817309419363	0	0	3.96478528732883e-22	1.00719772925314e-41	0	0
MYRF	2	1	0	1	0	0.363309032748684	0	0.407930938115532	0	1.20093961314301e-26	0	1.20711951170677e-89	0
MZT2A	2	0	1	0	1	0	0.25314533312973	0	0.254912288766769	0	3.29045847162963e-14	0	6.26077366308259e-35
NCAM1	2	1	1	0	0	0.296417502127569	0.290035891129656	0	0	8.45233157486797e-20	2.24193965763386e-22	0	0
NCAN	2	1	0	1	0	0.296350422760619	0	0.281768254506512	0	4.21868220096913e-12	0	3.44625610536633e-24	0
NDN	2	1	0	1	0	0.284375546252943	0	0.296100712520764	0	2.16948451908572e-13	0	1.83310373272746e-33	0
NDUFA3	2	0	1	0	1	0	0.254950585646025	0	0.337181032529568	0	6.85815096869509e-21	0	1.04513096865014e-72
NECAB2	2	0	1	0	1	0	0.5525690035113	0	0.522779984262584	0	3.15132565720388e-63	0	5.76818164938331e-122
NFIB	2	1	1	0	0	0.2655448363756	0.255017162472264	0	0	4.14097051762841e-11	2.21922791706542e-14	0	0
NKX6-2	2	1	0	1	0	0.280769741150072	0	0.352456945691506	0	2.43868103058411e-17	0	2.49941410834367e-81	0
NNAT	2	1	1	0	0	0.382850191038375	0.322808556202576	0	0	2.80702522664307e-25	3.31689819194937e-24	0	0
NPC2	2	1	1	0	0	0.298852311898228	0.296031900745599	0	0	9.01252800839805e-15	8.48714190768764e-19	0	0
NPDC1	2	0	1	0	1	0	0.276156334831159	0	0.324106783929433	0	2.50592323426506e-16	0	5.20480002453421e-51
NPTX2	2	0	1	0	1	0	0.524225763701669	0	0.508107088861105	0	2.84953954048905e-56	0	2.54058279835741e-120
NPY	2	1	0	1	0	0.68641671930636	0	0.598654608642127	0	3.07219128124758e-57	0	7.16840324781565e-94	0
NQO1	2	0	1	0	1	0	0.408268429247024	0	0.312291304074617	0	3.64061958810783e-37	0	1.67063051968018e-50
NRXN2	2	1	1	0	0	0.452005263954471	0.357682424252629	0	0	3.66659372275552e-38	3.11137133134491e-28	0	0
NSG2	2	0	1	0	1	0	0.392674097808025	0	0.5894211574358	0	2.51021778202692e-39	0	4.73862404398715e-158
NUPR1	2	0	1	0	1	0	0.755454643873762	0	0.729205546984558	0	5.14465350970371e-92	0	1.45999465168133e-187
OLIG1	2	1	1	0	0	0.449217855345723	0.253724276114331	0	0	3.14528175930318e-35	1.48365426312292e-10	0	0
OPALIN	2	1	0	1	0	0.293037169061935	0	0.365733042675149	0	1.79539659464078e-16	0	1.13449235996487e-72	0
PABPC1	2	1	1	0	0	0.379158042384147	0.346069883515502	0	0	1.15591804529896e-23	4.23482150353708e-23	0	0
PADI2	2	1	0	1	0	0.347492663695295	0	0.292229267277446	0	2.35127942135672e-23	0	1.22311061568955e-36	0
PALM	2	1	1	0	0	0.322362211091753	0.400549401787326	0	0	3.19445151874981e-18	3.69813454533288e-36	0	0
PAPOLA	2	0	1	0	1	0	0.266175286688393	0	0.257807956558529	0	1.14599990026667e-13	0	7.32441645665043e-35
PBXIP1	2	1	1	0	0	0.286351870990517	0.281751936017334	0	0	4.44284902550816e-12	1.72123435087996e-16	0	0
PCBP2	2	1	1	0	0	0.334740935908784	0.282034191791145	0	0	6.07779122671824e-21	3.00143919168587e-17	0	0
PCDH17	2	1	1	0	0	0.289936921121723	0.256242925125708	0	0	1.12743405290793e-18	4.99064174018632e-18	0	0
PCSK1N	2	0	0	1	1	0	0	0.302468594280004	0.379377524934702	0	0	1.29088683768507e-54	2.57411241797124e-120
PDE1A	2	0	1	0	1	0	0.258594236947959	0	0.272516556857967	0	1.40691537988883e-14	0	7.50514564379463e-43
PDE4DIP	2	1	0	1	0	0.313220963411609	0	0.304538787326702	0	1.23997912325628e-17	0	1.1773431355877e-33	0
PDIA6	2	0	1	0	1	0	0.37715209053731	0	0.350412329879232	0	1.88342069857084e-30	0	8.18009940967154e-61
PDZD4	2	1	1	0	0	0.261314051031535	0.373380237350412	0	0	7.79537324243015e-13	1.47020423871444e-35	0	0
PGBD5	2	0	1	0	1	0	0.415492775838214	0	0.404737871930817	0	1.04077279792034e-37	0	2.8738112590092e-80
PI4KA	2	0	0	1	1	0	0	0.289982075320541	0.426536076154592	0	0	5.41748225565186e-31	1.61393240085278e-91
PIANP	2	0	1	0	1	0	0.272275048321538	0	0.299956457957711	0	1.48927380153893e-14	0	5.67153515090305e-44
PIP4K2A	2	1	0	1	0	0.348604745786235	0	0.391267545445681	0	4.49560763503658e-19	0	6.17352444011485e-53	0
PIP4K2B	2	1	1	0	0	0.267572102377674	0.299672266069269	0	0	4.22171614191079e-13	7.55707796676925e-20	0	0
PKIA	2	1	1	0	0	0.271738820623357	0.348583102239075	0	0	2.34232333535404e-13	2.07882225493715e-24	0	0
PKP4	2	1	0	1	0	0.255709283529105	0	0.271094034259345	0	5.84078794191971e-10	0	1.13619459069523e-28	0
PLAAT4	2	0	1	0	1	0	0.352203126044031	0	0.347606213810467	0	1.99345487627517e-29	0	2.92007286419799e-73
PLD3	2	0	1	0	1	0	0.319373728168544	0	0.454574167490627	0	2.1215924067917e-37	0	7.70125351571607e-129
PLEKHB1	2	1	1	0	0	0.714074061023266	0.400517474394472	0	0	2.4921497193992e-85	9.95098208857162e-37	0	0
PLEKHH1	2	1	0	1	0	0.332692918420554	0	0.342710939903175	0	8.01899544037409e-22	0	3.69668172683849e-54	0
PLPPR2	2	1	1	0	0	0.305398454320376	0.32217753262737	0	0	2.39075469662076e-14	1.29193380881695e-23	0	0
PLTP	2	1	1	0	0	0.334212752830843	0.450229371363275	0	0	7.28004099759728e-22	8.88090474671893e-48	0	0
PPDPF	2	0	1	0	1	0	0.550062505380987	0	0.416098807475817	0	4.6116799047863e-77	0	2.14864501727098e-96
PPIB	2	0	1	0	1	0	0.331657022310103	0	0.287101669318801	0	8.94464224381158e-26	0	3.30929479258033e-45
PPP1R14A	2	1	0	1	0	0.334919731315844	0	0.441339161050014	0	9.87161509878596e-20	0	3.09890732093236e-87	0
PPP2CB	2	1	1	0	0	0.339511336064815	0.276317940772988	0	0	3.1367593571163e-25	2.60075913984177e-17	0	0
PRDX1	2	1	1	0	0	0.294625386252265	0.306950110284797	0	0	4.0283815054978e-19	8.72569728925728e-23	0	0
PSAT1	2	1	0	1	0	0.425335725036648	0	0.256836150025593	0	3.05393747758222e-30	0	1.87628120872299e-20	0
PSD	2	1	1	0	0	0.333512764848433	0.389903513784442	0	0	1.26470293541094e-25	4.25759863125235e-47	0	0
PSD2	2	1	0	1	0	0.450982826855143	0	0.405377205300681	0	2.38273459166101e-37	0	4.86600229196318e-64	0
PSD3	2	0	1	0	1	0	0.464834154884673	0	0.485424610578399	0	1.39351643103629e-57	0	4.7032071692951e-117
PTGER3	2	0	1	0	1	0	0.252652433601519	0	0.257579892883917	0	2.66960347015698e-26	0	1.11620193348104e-93
PTGES3	2	0	1	0	1	0	0.47564610807789	0	0.337383089393261	0	1.80115607752289e-54	0	6.35836801765391e-61
PTMS	2	1	1	0	0	0.380099657487851	0.353230405977563	0	0	8.91149824999278e-32	1.76561048321406e-33	0	0
PTP4A2	2	1	0	1	0	0.394366971121753	0	0.267104065770837	0	5.75290088967933e-27	0	3.87938182757824e-24	0
PTPRZ1	2	1	1	0	0	0.42895918988488	0.375169471484171	0	0	1.75079414336083e-26	2.38318782444249e-29	0	0
PTTG1IP	2	1	1	0	0	0.284848882303541	0.299885072777739	0	0	2.01405945556378e-14	3.3910821323797e-20	0	0
QDPR	2	1	0	1	0	0.573339134216094	0	0.635619570094284	0	4.15386209588713e-60	0	1.45913705273941e-123	0
RAB3B	2	1	0	1	0	0.266108793589164	0	0.25831060928766	0	1.94795470617416e-18	0	1.42746644841572e-43	0
RAB3C	2	0	0	1	1	0	0	0.313644535869832	0.293285678585568	0	0	6.05678519729379e-36	4.71220313026234e-47
RAB40B	2	0	1	0	1	0	0.305170319980137	0	0.33875589353897	0	1.09735604494151e-17	0	1.20262431225043e-54
RACK1	2	1	1	0	0	0.316286883033444	0.338724458065229	0	0	1.15465283833734e-18	6.57033378383775e-27	0	0
RASD1	2	0	1	0	1	0	0.312422716494172	0	0.25660769124816	0	5.68850168438997e-22	0	5.45263880694875e-32
RASL10A	2	0	1	0	1	0	0.297578266679824	0	0.328622943756389	0	8.34739284470226e-22	0	2.41275081763798e-69
RCN1	2	0	1	0	1	0	0.375795253732377	0	0.363730791835129	0	9.45659495222799e-31	0	5.28302592429731e-68
RGS14	2	0	1	0	1	0	0.385995506405344	0	0.365112410283936	0	3.69162943146914e-40	0	2.03541955418569e-88
RHBDD2	2	0	1	0	1	0	0.415843882298953	0	0.337269325591864	0	1.03741098973999e-51	0	9.26973070788362e-73
RNASE1	2	1	0	1	0	0.304263637300507	0	0.3566917268269	0	1.53764463340318e-14	0	1.49719991038098e-45	0
RNASEK	2	0	1	0	1	0	0.288277033895057	0	0.293873340242504	0	2.9247612369022e-27	0	1.00427986319853e-56
RNASET2	2	1	1	0	0	0.286349442851297	0.368061639901112	0	0	5.91428881353506e-16	1.06305822000516e-27	0	0
RNF130	2	1	1	0	0	0.292957567071843	0.279077750451671	0	0	1.55459672348079e-15	1.78181695008833e-16	0	0
RPL10A	2	1	1	0	0	0.257704369854613	0.295643554460317	0	0	6.7395393969011e-12	9.8193852477514e-23	0	0
RPL11	2	1	1	0	0	0.353356507543808	0.342790416997493	0	0	2.58376468645883e-26	1.00209196058045e-25	0	0
RPL12	2	1	1	0	0	0.250411004242588	0.384412756095694	0	0	5.10603517452791e-10	8.38052330395809e-31	0	0
RPL13	2	1	1	0	0	0.375093495466185	0.391823605487158	0	0	2.55330545009779e-55	1.12622741348247e-71	0	0
RPL13A	2	1	1	0	0	0.372998777865999	0.436519516306996	0	0	2.96361327728645e-44	5.58206778895958e-73	0	0
RPL18	2	1	1	0	0	0.25754353798897	0.352578721582451	0	0	8.71208309764451e-19	1.13334728831375e-48	0	0
RPL19	2	1	1	0	0	0.302130071469179	0.310627262004159	0	0	7.36309313108014e-26	5.25334900194228e-33	0	0
RPL21	2	1	1	0	0	0.285131099886188	0.313155525467377	0	0	8.39367287606462e-23	1.17898941174938e-32	0	0
RPL22	2	1	1	0	0	0.275090738141949	0.25678544060238	0	0	2.38965579392132e-15	1.35351731174642e-19	0	0
RPL23	2	1	1	0	0	0.284393519257491	0.368951876308318	0	0	8.91320339996878e-16	2.92400407619623e-36	0	0
RPL23A	2	1	1	0	0	0.301550718055534	0.303181574781872	0	0	6.2216419973453e-25	3.61557914510005e-30	0	0
RPL27A	2	1	1	0	0	0.47685729059098	0.480873819427616	0	0	1.21883373344238e-42	1.0143758016896e-53	0	0
RPL29	2	1	1	0	0	0.262527803856689	0.375648178248601	0	0	1.37533456146313e-17	2.17158983618762e-44	0	0
RPL30	2	1	1	0	0	0.354560615482866	0.263984565071627	0	0	1.5081175947339e-35	6.23949374969664e-24	0	0
RPL31	2	1	1	0	0	0.290131249509548	0.356908512349561	0	0	1.01918531819642e-39	3.58721386694975e-60	0	0
RPL36A	2	1	1	0	0	0.259063745558176	0.289466329291199	0	0	1.27240194492055e-18	2.18813204273097e-24	0	0
RPL39	2	1	1	0	0	0.380339084218312	0.438674587914153	0	0	2.69179688875544e-35	7.95649987555571e-51	0	0
RPL4	2	0	1	0	1	0	0.310174030707312	0	0.330987351881912	0	2.68220733997136e-48	0	3.46638675682912e-101
RPLP1	2	1	1	0	0	0.343198427279961	0.371830570218656	0	0	1.94106982553807e-51	3.70034320074353e-70	0	0
RPLP2	2	1	1	0	0	0.30749085959405	0.368678421583672	0	0	3.4539548067136e-27	1.9691544488968e-47	0	0
RPS11	2	1	1	0	0	0.316499003603571	0.393816430097469	0	0	1.48479774423839e-29	8.4715441197477e-53	0	0
RPS16	2	1	1	0	0	0.280163409294743	0.34307000859851	0	0	2.58001199410928e-16	6.78958981613559e-34	0	0
RPS18	2	1	1	0	0	0.405663675191246	0.436449105225341	0	0	4.34823323511276e-46	9.75563007434587e-65	0	0
RPS23	2	1	1	0	0	0.347505113506991	0.28477896970113	0	0	2.63855222008794e-38	2.09456974409754e-31	0	0
RPS24	2	1	1	0	0	0.29018598461064	0.293738321521176	0	0	1.24949961789089e-28	6.85951580046365e-34	0	0
RPS28	2	1	1	0	0	0.283986129768546	0.375895954718262	0	0	1.98750625244287e-34	1.29130289562952e-70	0	0
RPS3	2	1	1	0	0	0.355215598128113	0.355754573889163	0	0	1.20025107442639e-26	4.24004302888865e-32	0	0
RPS5	2	1	1	0	0	0.305749108127292	0.361282902892571	0	0	1.98797604700731e-18	6.91334672285189e-34	0	0
RPS6	2	1	1	0	0	0.453512406198109	0.420534269423743	0	0	1.29022220915563e-49	6.62612127982611e-53	0	0
RPS9	2	1	1	0	0	0.362596967077882	0.315857527200078	0	0	3.54843481274521e-26	8.05573065594314e-22	0	0
RTN3	2	0	0	1	1	0	0	0.261776347043799	0.545402583365475	0	0	5.74720791541748e-39	2.22869739170235e-203
RTN4R	2	0	1	0	1	0	0.403772449254401	0	0.331390473198091	0	7.49926137773572e-36	0	1.92497476477756e-56
RUNDC3A	2	0	1	0	1	0	0.352103554430584	0	0.354546210590592	0	3.72422613362489e-37	0	5.11941693748209e-75
S100A10	2	0	1	0	1	0	0.350628362568053	0	0.283847589058731	0	1.32546616174361e-28	0	6.90704640913498e-47
S100A11	2	0	1	0	1	0	0.342827746448567	0	0.298512337958211	0	3.3735102042978e-27	0	1.2169505504512e-50
S100A6	2	1	1	0	0	0.257653969130664	0.254389052956357	0	0	1.20334157265927e-09	1.00258088784041e-12	0	0
S100A8	2	0	1	0	1	0	0.268166879680401	0	0.387257293822081	0	1.76703494147723e-17	0	1.02825993010271e-112
S100A9	2	0	1	0	1	0	0.290117018380302	0	0.36379389725275	0	5.64548694658171e-20	0	1.61764898378418e-91
SCD5	2	1	1	0	0	0.469914594337693	0.395399128793146	0	0	1.86773989912617e-49	1.28408437632603e-40	0	0
SDC4	2	1	0	1	0	0.407621710474545	0	0.287832041891743	0	2.89021223448652e-28	0	9.91469024849217e-28	0
SDF2L1	2	0	1	0	1	0	0.255627881130676	0	0.29064282751354	0	1.68105229066488e-18	0	1.03404190590279e-66
SEC11C	2	0	1	0	1	0	0.433607476029744	0	0.321100231101651	0	6.11344418850841e-43	0	9.03863690702201e-53
SEMA3D	2	0	1	0	1	0	0.254772960781971	0	0.27255498935397	0	3.2258230295885e-24	0	1.36233912638145e-96
SEMA4F	2	0	1	0	1	0	0.250706008111518	0	0.295184054268331	0	5.21238878410745e-16	0	1.15396479263553e-59
SEPTIN4	2	1	0	1	0	0.424294478226878	0	0.404075466482967	0	4.05510474441608e-29	0	1.66545513965651e-51	0
SEZ6L	2	0	1	0	1	0	0.344728640440865	0	0.262417594913451	0	7.08255880103756e-25	0	4.65547977004034e-33
SGK1	2	1	0	1	0	0.35530586215044	0	0.375330860537953	0	2.32925626303504e-26	0	4.96527362075585e-75	0
SH3BGRL3	2	1	1	0	0	0.424978136658159	0.394645247984827	0	0	1.94739033561637e-34	5.38344301381877e-34	0	0
SH3GL2	2	0	0	1	1	0	0	0.322315377118816	0.533280392332742	0	0	8.24341935256346e-35	2.2486298901476e-124
SHTN1	2	1	0	1	0	0.304496176094912	0	0.254364056372176	0	8.06533578253054e-16	0	1.18360701507585e-24	0
SLC30A3	2	0	1	0	1	0	0.368654657415686	0	0.468446711362113	0	2.28756204684559e-29	0	1.39680178222992e-113
SLC3A2	2	1	1	0	0	0.281931116102822	0.290877944374969	0	0	2.71965437530529e-13	4.17931474786569e-19	0	0
SLC44A1	2	1	0	1	0	0.335657244046867	0	0.284807577459344	0	3.31313260132607e-21	0	3.16716837704784e-33	0
SLCO1A2	2	1	0	1	0	0.271714354808216	0	0.270982519172968	0	6.09095841814115e-18	0	7.78782813166402e-49	0
SMIM29	2	0	1	0	1	0	0.37552591418978	0	0.355907570722059	0	2.4141502491186e-31	0	7.07288532244961e-64
SNCG	2	0	1	0	1	0	0.266949984400991	0	0.357430846168844	0	2.23894586257289e-17	0	3.10968949530068e-65
SNX3	2	0	1	0	1	0	0.362981743289576	0	0.319464933890016	0	3.79501387358582e-32	0	4.44135396946616e-53
SOD2	2	0	1	0	1	0	0.672649891020694	0	0.616403037746295	0	1.2340874954087e-93	0	2.43006579584283e-161
SORBS2	2	0	1	0	1	0	0.374039973351367	0	0.362180487551007	0	3.2621597144415e-31	0	2.5135654780875e-70
SOWAHA	2	0	1	0	1	0	0.539214673277306	0	0.360433456396254	0	2.9566330164481e-63	0	6.85659716628309e-66
SPARC	2	0	0	1	1	0	0	0.33120824228947	0.265906597928548	0	0	2.73579861123595e-40	9.14676317547217e-32
SPOCK1	2	1	0	1	0	0.348185630114155	0	0.262393357457948	0	9.90292447289336e-26	0	2.72911027734806e-27	0
SPP1	2	0	1	0	1	0	1.05024297260559	0	1.0191908548649	0	2.59196341345034e-117	0	4.34176184567058e-232
SPRED1	2	0	1	0	1	0	0.383645053632419	0	0.337321392946614	0	8.26538727766113e-35	0	1.26820036968904e-65
SREBF1	2	1	0	1	0	0.556309206986753	0	0.287243202731843	0	5.63962288015289e-51	0	6.74181124314953e-26	0
SREBF2	2	0	0	1	1	0	0	0.261672276491212	0.400905327786406	0	0	1.34767817301221e-22	7.37534089739106e-84
STIM1	2	0	1	0	1	0	0.402897880694207	0	0.291566467774508	0	3.5244943820765e-38	0	7.91266867865977e-46
STIP1	2	0	1	0	1	0	0.293688100646609	0	0.341640150075447	0	7.39807341715072e-19	0	2.33083379496152e-62
STMN1	2	0	0	1	1	0	0	0.393630729432172	0.531235796948191	0	0	5.47726782175021e-91	3.07915798253891e-201
STMN3	2	0	0	1	1	0	0	0.307605504765391	0.299538479484259	0	0	4.96308382593401e-43	9.09341836084109e-59
STMN4	2	0	0	1	1	0	0	0.386456044776572	0.413387894301868	0	0	5.26183379825343e-49	1.29756013551469e-81
SUB1	2	0	1	0	1	0	0.375382101720992	0	0.356593584630094	0	4.24446458016612e-35	0	4.37753960455059e-66
SYN1	2	1	1	0	0	0.27740533651817	0.25027677155203	0	0	3.64183502871655e-24	1.67409915280243e-22	0	0
TCEAL7	2	0	0	1	1	0	0	0.279860788819319	0.264681500279797	0	0	6.3339235236152e-35	2.1150488940277e-39
TEF	2	0	1	0	1	0	0.297473423454538	0	0.289867745169441	0	5.77276711018637e-20	0	1.60852817550737e-43
TF	2	1	0	1	0	0.566375865134683	0	0.7050008728601	0	1.26228322756774e-52	0	3.62340988874118e-169	0
THRA	2	1	1	0	0	0.301147061595334	0.38661123108168	0	0	1.79320900537349e-18	6.81876087667012e-39	0	0
THY1	2	0	1	0	1	0	0.359885196334095	0	0.605590856022747	0	3.75657432723144e-65	0	1.75387911676686e-252
TIMP1	2	0	1	0	1	0	0.312923243275456	0	0.294243528273665	0	1.44164419032993e-21	0	4.45993923240031e-44
TKT	2	0	1	0	1	0	0.263293483122375	0	0.289443761364891	0	1.07477355231456e-13	0	8.67022237602594e-41
TMBIM1	2	0	1	0	1	0	0.350666305312456	0	0.315561301319071	0	2.68214601112124e-26	0	1.36971314932753e-50
TMBIM6	2	1	1	0	0	0.36020611696828	0.297782928070081	0	0	8.59856584768726e-28	1.24606750176317e-21	0	0
TMEM130	2	0	0	1	1	0	0	0.354521473044247	0.515610610446196	0	0	1.63817478849334e-48	1.41880386791765e-128
TMEM158	2	0	1	0	1	0	0.331477768907972	0	0.329795715624514	0	3.55560085212474e-26	0	5.4720188891514e-64
TMEM47	2	1	1	0	0	0.279942824046358	0.290300873423541	0	0	2.76142530163945e-12	1.53525290917433e-16	0	0
TMEM59L	2	0	1	0	1	0	0.354124325007831	0	0.462812016471094	0	6.83004735084689e-52	0	4.26500918093148e-148
TMSB4X	2	0	1	0	1	0	0.44082046191899	0	0.411003684831631	0	3.29155099732778e-123	0	5.89867753396904e-222
TP53I11	2	0	1	0	1	0	0.431603282285996	0	0.299924048824815	0	9.14371172726948e-51	0	3.72159295078651e-58
TPT1	2	1	1	0	0	0.278317680247324	0.392265906103803	0	0	4.86147608328358e-27	7.72895423729371e-67	0	0
TRIL	2	1	0	1	0	0.426803318678341	0	0.557501917386375	0	1.32093717183959e-34	0	2.20824826358368e-124	0
TSC22D4	2	1	1	0	0	0.577302879943935	0.487525148889315	0	0	7.18546100874356e-58	4.62288017292305e-48	0	0
TTYH2	2	1	0	1	0	0.391129532217767	0	0.3879175695137	0	1.48794255132433e-28	0	6.24933636542159e-63	0
TUBA1B	2	0	0	1	1	0	0	0.588255772397143	0.402705301287746	0	0	2.33505727100481e-222	3.72196212321408e-178
TUBB	2	1	0	1	0	0.263664864744535	0	0.477376509830537	0	6.79498781416676e-18	0	2.94711455164046e-93	0
TUBB4A	2	1	0	1	0	0.276994330565087	0	0.27920294422823	0	2.75265485116793e-19	0	4.91244979360888e-36	0
TYRO3	2	0	1	0	1	0	0.318935780202353	0	0.26112054737151	0	9.29005151655281e-24	0	5.8921594382028e-36
TYROBP	2	0	1	0	1	0	0.381364081685125	0	0.277205064452077	0	5.76989499881762e-35	0	2.25467815297361e-44
UBA52	2	1	1	0	0	0.326697338995759	0.418886533033897	0	0	2.64611405849871e-29	1.15452125861174e-56	0	0
UBB	2	0	1	0	1	0	0.267647859437444	0	0.252851993680973	0	3.88103352160004e-58	0	1.27882322442995e-95
VGF	2	0	1	0	1	0	0.299964522982365	0	0.285715133732794	0	1.5277702717199e-19	0	3.4690767742262e-46
VSIG4	2	0	1	0	1	0	0.441405805642235	0	0.483306676386473	0	1.91121072354202e-44	0	1.74718504604555e-143
VXN	2	0	1	0	1	0	0.27769816133692	0	0.282923815263355	0	2.65722285054903e-14	0	4.10236717365644e-36
WSB1	2	1	0	1	0	0.254532483077298	0	0.349416443857647	0	1.12832623223216e-10	0	5.04057915727351e-50	0
XPO1	2	0	1	0	1	0	0.287960106675355	0	0.26985349316198	0	1.97470096044643e-17	0	4.60827858074779e-38
YBX1	2	1	1	0	0	0.264577008760678	0.260967144590206	0	0	4.5838895446712e-13	9.07730065149618e-16	0	0
YJEFN3	2	0	1	0	1	0	0.271646577459396	0	0.297141447105872	0	9.24787411483561e-17	0	1.42618229113677e-45
YWHAB	2	0	1	0	1	0	0.281388028805462	0	0.279404773957017	0	1.13566840246219e-26	0	2.82816341008626e-54
YWHAE	2	1	1	0	0	0.41869569319527	0.375464694944424	0	0	8.75613890369465e-61	2.93672166583281e-59	0	0
YWHAH	2	0	0	1	1	0	0	0.38966133221579	0.754099828470585	0	0	4.88414838731343e-92	0
YWHAQ	2	0	1	0	1	0	0.282353830311761	0	0.26870175149045	0	2.03560588380515e-20	0	4.28289047511416e-41
ZBTB18	2	0	1	0	1	0	0.347890362672648	0	0.303825661772787	0	1.27373837472711e-24	0	7.05208087179995e-42
ZCCHC12	2	0	1	0	1	0	0.294529843972425	0	0.265208166648834	0	2.59693949578143e-22	0	2.82545756322661e-42
ZCCHC17	2	0	1	0	1	0	0.293685396321311	0	0.2782454626649	0	2.26499506119887e-19	0	5.6872894289894e-42
ABHD17A	1	1	0	0	0	0.275464888513189	0	0	0	9.40109190437389e-12	0	0	0
ACAP3	1	0	1	0	0	0	0.288888709551553	0	0	0	1.5542234610205e-17	0	0
ACOT7	1	0	0	0	1	0	0	0	0.466887720590001	0	0	0	4.00133566206393e-99
ADCYAP1R1	1	1	0	0	0	0.293015074381577	0	0	0	2.44797164943474e-14	0	0	0
ADGRB1	1	0	1	0	0	0	0.255420218374245	0	0	0	2.34609614628738e-13	0	0
AGAP2	1	1	0	0	0	0.295667595830709	0	0	0	6.25734534825897e-15	0	0	0
AGAP3	1	1	0	0	0	0.320014058425367	0	0	0	6.32290465392999e-22	0	0	0
AGPAT1	1	0	1	0	0	0	0.290398008256065	0	0	0	9.15279203283002e-18	0	0
AHCYL1	1	0	1	0	0	0	0.307055334675908	0	0	0	2.33498482400033e-21	0	0
AHNAK	1	1	0	0	0	0.290514842435052	0	0	0	3.00533410040511e-16	0	0	0
AHSA1	1	0	0	0	1	0	0	0	0.26488425696031	0	0	0	4.25486977921255e-36
AIF1L	1	1	0	0	0	0.27654655438393	0	0	0	5.07996143922651e-17	0	0	0
AL359091.1	1	0	0	1	0	0	0	0.278897242896048	0	0	0	3.27899394120797e-51	0
AL627171.2	1	1	0	0	0	0.3044366233543	0	0	0	2.69233013407712e-14	0	0	0
ALDH2	1	1	0	0	0	0.323543965358964	0	0	0	2.81594867441879e-20	0	0	0
ALDH6A1	1	1	0	0	0	0.356685871945027	0	0	0	7.76672196688215e-25	0	0	0
ANKRD40	1	1	0	0	0	0.262178926076665	0	0	0	6.17054391581497e-10	0	0	0
ANP32A	1	1	0	0	0	0.25740489009542	0	0	0	4.0937982770968e-11	0	0	0
ANP32B	1	1	0	0	0	0.271526951019434	0	0	0	2.89388781715348e-16	0	0	0
ANXA5	1	1	0	0	0	0.260760037619907	0	0	0	9.88578885696524e-14	0	0	0
AP2M1	1	0	0	0	1	0	0	0	0.294305895117613	0	0	0	1.3096206952354e-62
APCDD1	1	1	0	0	0	0.25810019146793	0	0	0	4.22470777413887e-14	0	0	0
APOC2	1	0	1	0	0	0	0.392749403910251	0	0	0	1.22767475162807e-39	0	0
ARF1	1	0	0	0	1	0	0	0	0.33411922185069	0	0	0	1.24914836061006e-64
ARHGAP5	1	1	0	0	0	0.260337834472254	0	0	0	4.70625759602947e-11	0	0	0
ARHGDIB	1	0	1	0	0	0	0.276991838357532	0	0	0	7.91377683891513e-22	0	0
ARHGDIG	1	1	0	0	0	0.295186248047648	0	0	0	3.12979110602608e-15	0	0	0
ARL6IP5	1	0	0	0	1	0	0	0	0.282780318349487	0	0	0	3.88804771866414e-37
ARL8A	1	1	0	0	0	0.252657327956787	0	0	0	6.01648501435077e-09	0	0	0
ARNT2	1	0	1	0	0	0	0.375441116925855	0	0	0	3.632417869386e-35	0	0
ARPC3	1	0	1	0	0	0	0.270639038052143	0	0	0	1.17724398929684e-14	0	0
ARRB2	1	0	0	0	1	0	0	0	0.252455172303372	0	0	0	1.43301642314933e-40
ASAH1	1	1	0	0	0	0.256294972405469	0	0	0	5.89406614510515e-10	0	0	0
ATN1	1	1	0	0	0	0.331482601137007	0	0	0	5.22650659398164e-21	0	0	0
ATP1A3	1	0	0	1	0	0	0	0.259046675812233	0	0	0	3.03845026336183e-32	0
ATP2A2	1	0	0	0	1	0	0	0	0.369626795746701	0	0	0	6.73596894445083e-76
ATP2B3	1	0	0	0	1	0	0	0	0.273968497334065	0	0	0	9.82631834580293e-49
ATP5IF1	1	0	0	0	1	0	0	0	0.344393963764178	0	0	0	4.62687689330527e-65
ATP6AP1	1	0	0	0	1	0	0	0	0.359010892434724	0	0	0	3.48729770282894e-63
ATP6V0C	1	0	0	0	1	0	0	0	0.431373580884565	0	0	0	9.80542912336891e-168
ATP6V1B2	1	0	0	0	1	0	0	0	0.251513813392676	0	0	0	4.07731081845794e-34
ATP6V1C1	1	0	0	0	1	0	0	0	0.334518164956196	0	0	0	9.11293629518178e-56
ATP6V1D	1	0	0	0	1	0	0	0	0.303981260462755	0	0	0	5.43292747812529e-44
ATP6V1G2	1	0	0	0	1	0	0	0	0.372083506787708	0	0	0	1.88783497616667e-66
BAALC	1	0	1	0	0	0	0.280031319892897	0	0	0	4.59237618576915e-22	0	0
BAIAP2	1	0	1	0	0	0	0.419939632651203	0	0	0	1.72607150409089e-37	0	0
BANF1	1	0	0	0	1	0	0	0	0.256457542466664	0	0	0	1.92415306467938e-36
BCAP31	1	0	1	0	0	0	0.296698430111801	0	0	0	7.71072032289272e-19	0	0
BDH2	1	1	0	0	0	0.277873532030241	0	0	0	6.65286987935551e-14	0	0	0
BEX1	1	0	0	0	1	0	0	0	0.523364333554224	0	0	0	9.25494447428504e-172
BLCAP	1	1	0	0	0	0.285888705331776	0	0	0	5.60246372361889e-13	0	0	0
BMPR2	1	0	0	0	1	0	0	0	0.268494678995319	0	0	0	3.99522130970192e-38
BNIP3L	1	1	0	0	0	0.250680599363975	0	0	0	1.64298420414299e-10	0	0	0
BRI3	1	0	1	0	0	0	0.322093212040449	0	0	0	1.17047398204685e-22	0	0
BRINP1	1	0	0	0	1	0	0	0	0.297893591274433	0	0	0	2.85750873726315e-54
BSG	1	0	1	0	0	0	0.533652447280048	0	0	0	1.99231866030038e-89	0	0
BSN	1	0	1	0	0	0	0.323162985112874	0	0	0	3.25257187002576e-24	0	0
BTBD3	1	0	1	0	0	0	0.256992189656455	0	0	0	5.0747616973928e-13	0	0
C19orf53	1	0	1	0	0	0	0.311642419973028	0	0	0	2.06222861970712e-19	0	0
C1orf198	1	1	0	0	0	0.277244968277673	0	0	0	2.15895339406431e-13	0	0	0
C1orf216	1	0	1	0	0	0	0.253228868941437	0	0	0	3.22175617731784e-13	0	0
C2orf80	1	0	0	0	1	0	0	0	0.26300780425313	0	0	0	1.19242031741721e-45
C7orf50	1	0	1	0	0	0	0.260971750543247	0	0	0	1.40963517538288e-14	0	0
CA11	1	0	1	0	0	0	0.336025071208461	0	0	0	3.98668562071661e-27	0	0
CABIN1	1	0	1	0	0	0	0.280815183875644	0	0	0	7.87805743175649e-19	0	0
CALB1	1	0	0	0	1	0	0	0	0.265665404040179	0	0	0	1.28963414855676e-45
CALM1	1	0	0	0	1	0	0	0	0.386738803780346	0	0	0	5.17324976475476e-243
CALM3	1	0	0	0	1	0	0	0	0.503084423225006	0	0	0	2.3945092759124e-262
CALY	1	0	0	0	1	0	0	0	0.336562160135981	0	0	0	1.91822897179673e-70
CARNS1	1	0	0	1	0	0	0	0.334842398990524	0	0	0	2.29232552488473e-72	0
CASC4	1	1	0	0	0	0.250323521949284	0	0	0	1.88018167107203e-09	0	0	0
CBLN4	1	0	0	0	1	0	0	0	0.281632748729178	0	0	0	8.87669904182076e-52
CCDC3	1	0	0	0	1	0	0	0	0.250645030198223	0	0	0	2.34430389459896e-35
CCDC88A	1	1	0	0	0	0.279383002066208	0	0	0	5.50153697145848e-13	0	0	0
CCND3	1	0	1	0	0	0	0.259572855059115	0	0	0	8.20362963959192e-15	0	0
CD14	1	0	0	0	1	0	0	0	0.250184248065581	0	0	0	3.91851118047157e-35
CD163	1	0	0	0	1	0	0	0	0.282916116461792	0	0	0	8.25300294887347e-81
CD59	1	0	1	0	0	0	0.250767165269339	0	0	0	2.6595362759739e-17	0	0
CD81	1	0	1	0	0	0	0.321482045129209	0	0	0	2.01574944002939e-34	0	0
CDC42EP4	1	1	0	0	0	0.334361724183927	0	0	0	1.03240971414146e-20	0	0	0
CDH13	1	0	0	1	0	0	0	0.304726181996594	0	0	0	4.64086808500033e-38	0
CDH22	1	0	1	0	0	0	0.307509691147802	0	0	0	7.20754348206785e-24	0	0
CDK5R1	1	0	0	0	1	0	0	0	0.315695297626751	0	0	0	8.82070862636213e-48
CDK5R2	1	1	0	0	0	0.265507163370631	0	0	0	5.38634427500545e-12	0	0	0
CEBPB	1	0	0	0	1	0	0	0	0.284217206508883	0	0	0	4.96831714122115e-41
CELF1	1	1	0	0	0	0.250692877007089	0	0	0	3.13069665738979e-09	0	0	0
CELF4	1	1	0	0	0	0.260210283993979	0	0	0	1.40505078877226e-11	0	0	0
CENPB	1	1	0	0	0	0.340712742189907	0	0	0	1.59333582887793e-20	0	0	0
CERS1	1	0	1	0	0	0	0.2510672416374	0	0	0	1.21698286736753e-13	0	0
CGREF1	1	0	0	0	1	0	0	0	0.252727080820658	0	0	0	2.23234099652459e-51
CHD3	1	1	0	0	0	0.353602994599435	0	0	0	2.58146324024869e-25	0	0	0
CHD5	1	1	0	0	0	0.273760914744842	0	0	0	5.93859755238887e-11	0	0	0
CHL1	1	0	0	0	1	0	0	0	0.274951526963871	0	0	0	7.29216451902309e-36
CHMP1B	1	0	1	0	0	0	0.272194168644719	0	0	0	2.48374586043472e-14	0	0
CHRNB2	1	0	1	0	0	0	0.25272039435421	0	0	0	1.57551944988605e-18	0	0
CHST1	1	0	1	0	0	0	0.268791199651594	0	0	0	5.72296564779536e-16	0	0
CLDN10	1	1	0	0	0	0.267751788371836	0	0	0	2.23605185174218e-10	0	0	0
CLIP3	1	0	1	0	0	0	0.251689457057883	0	0	0	2.11907745357423e-19	0	0
CLPTM1	1	0	1	0	0	0	0.272009215776753	0	0	0	6.10398042994578e-18	0	0
CLSTN1	1	0	0	0	1	0	0	0	0.438612786636717	0	0	0	7.18272605809416e-151
CLTC	1	0	0	0	1	0	0	0	0.291607751870656	0	0	0	8.61657284492982e-48
CLU	1	0	1	0	0	0	0.394131667994348	0	0	0	1.68510312976192e-141	0	0
CMAS	1	0	1	0	0	0	0.275372807138075	0	0	0	1.53807514799519e-15	0	0
CNTN1	1	1	0	0	0	0.345421244032666	0	0	0	6.3177061956481e-24	0	0	0
COMT	1	1	0	0	0	0.279310353805937	0	0	0	2.68614538304418e-15	0	0	0
CPE	1	1	0	0	0	0.410587421751025	0	0	0	7.14477007011546e-71	0	0	0
CPNE3	1	0	1	0	0	0	0.284884791518247	0	0	0	3.16322713883677e-23	0	0
CPNE5	1	0	1	0	0	0	0.260182523129789	0	0	0	1.1731338695733e-15	0	0
CRTAP	1	1	0	0	0	0.265709408289917	0	0	0	1.04630312509633e-12	0	0	0
CRTC1	1	0	1	0	0	0	0.295686502960777	0	0	0	4.36284233551893e-17	0	0
CRYM	1	0	0	0	1	0	0	0	0.414478519091382	0	0	0	3.5633577237772e-78
CSPG5	1	1	0	0	0	0.402309341644583	0	0	0	1.92449005640571e-26	0	0	0
CST3	1	0	1	0	0	0	0.25120728871579	0	0	0	6.26041353576382e-49	0	0
CSTB	1	0	1	0	0	0	0.43917562999829	0	0	0	2.72567692424898e-42	0	0
CTNND2	1	1	0	0	0	0.259834639548525	0	0	0	1.11797572191002e-13	0	0	0
CX3CR1	1	1	0	0	0	0.256612500432029	0	0	0	1.45457114108613e-21	0	0	0
CYB5R3	1	1	0	0	0	0.269413104543053	0	0	0	3.19421943135977e-11	0	0	0
DCLK2	1	0	1	0	0	0	0.255705516941128	0	0	0	1.04421195417714e-14	0	0
DCN	1	1	0	0	0	0.275971345854985	0	0	0	1.49220919636611e-15	0	0	0
DCTN1	1	0	0	0	1	0	0	0	0.266847623537214	0	0	0	4.15531121568823e-37
DDAH1	1	1	0	0	0	0.423573494175554	0	0	0	1.87652702797348e-33	0	0	0
DDX5	1	1	0	0	0	0.256693461398933	0	0	0	1.47968101393283e-12	0	0	0
DDX54	1	0	1	0	0	0	0.263517428606864	0	0	0	1.11213099808575e-18	0	0
DDX6	1	1	0	0	0	0.290198120026173	0	0	0	3.85053570055819e-14	0	0	0
DHCR24	1	0	0	0	1	0	0	0	0.27964234840966	0	0	0	2.42092779441451e-38
DKK3	1	0	1	0	0	0	0.391749213525175	0	0	0	1.51153002379392e-85	0	0
DNAJB4	1	0	1	0	0	0	0.286492174970409	0	0	0	1.03043658334906e-18	0	0
DNM1	1	0	0	0	1	0	0	0	0.317712298742778	0	0	0	6.64503452301435e-94
DPYSL2	1	0	0	0	1	0	0	0	0.297677073703428	0	0	0	1.63084141574719e-86
DPYSL3	1	1	0	0	0	0.273655321855219	0	0	0	1.65805206818422e-13	0	0	0
DYNC1LI2	1	1	0	0	0	0.261724943478915	0	0	0	1.21981453121873e-10	0	0	0
DYNLL2	1	0	1	0	0	0	0.266644222982133	0	0	0	5.61230971975326e-18	0	0
EDF1	1	0	1	0	0	0	0.266233646469595	0	0	0	1.31405503990993e-17	0	0
EEF1D	1	1	0	0	0	0.295002481073898	0	0	0	8.13462439057152e-15	0	0	0
EIF1	1	0	1	0	0	0	0.256990253461813	0	0	0	9.67557856287174e-33	0	0
EIF4A2	1	0	0	0	1	0	0	0	0.316645778454243	0	0	0	3.08037905380666e-97
ELFN2	1	0	1	0	0	0	0.299497151828488	0	0	0	2.3386645664704e-22	0	0
ELMO1	1	0	0	0	1	0	0	0	0.287456403054563	0	0	0	3.55811131386508e-37
ELOVL5	1	1	0	0	0	0.250772275922818	0	0	0	4.11470861141256e-10	0	0	0
EMC10	1	1	0	0	0	0.282304368018541	0	0	0	1.45679884781449e-13	0	0	0
ENO1	1	0	1	0	0	0	0.366023834699016	0	0	0	5.67732499593706e-53	0	0
ENSA	1	0	1	0	0	0	0.271889901820201	0	0	0	1.34548087250178e-16	0	0
EPDR1	1	0	0	0	1	0	0	0	0.324300573484782	0	0	0	5.01658876460323e-51
EPN2	1	1	0	0	0	0.262154038506263	0	0	0	1.46108135839534e-11	0	0	0
ERC2	1	0	1	0	0	0	0.274560428986123	0	0	0	7.88305984292821e-19	0	0
ERH	1	1	0	0	0	0.254109283187772	0	0	0	1.16962002878638e-10	0	0	0
EZR	1	1	0	0	0	0.517657744479565	0	0	0	7.57907302985842e-46	0	0	0
FABP5	1	0	0	0	1	0	0	0	0.260489409047549	0	0	0	1.99667335534016e-37
FAM102A	1	0	0	1	0	0	0	0.256112150491042	0	0	0	4.87680834937549e-29	0
FAM107B	1	0	0	1	0	0	0	0.271037058776915	0	0	0	2.37018782925063e-57	0
FAM131A	1	0	1	0	0	0	0.307210246144314	0	0	0	1.08348256861458e-20	0	0
FAM3C	1	0	0	0	1	0	0	0	0.315561880586455	0	0	0	7.07754747476859e-46
FAM49A	1	0	1	0	0	0	0.294272335872782	0	0	0	3.13496243209414e-17	0	0
FARP1	1	0	1	0	0	0	0.338561427877111	0	0	0	8.20313647684361e-24	0	0
FBXO2	1	1	0	0	0	0.357428757522546	0	0	0	1.29737725992546e-24	0	0	0
FEZ1	1	1	0	0	0	0.315652888210965	0	0	0	8.246610605328e-19	0	0	0
FGD5-AS1	1	1	0	0	0	0.339773317680632	0	0	0	3.34607057167094e-20	0	0	0
FGF1	1	1	0	0	0	0.277070272015119	0	0	0	1.35220624831373e-14	0	0	0
FGFR3	1	1	0	0	0	0.514448250451462	0	0	0	2.64570959586433e-42	0	0	0
FKBP4	1	0	0	0	1	0	0	0	0.266253211616871	0	0	0	1.32456156084443e-35
FLOT2	1	0	1	0	0	0	0.287205475855511	0	0	0	1.16703664527033e-18	0	0
FMNL2	1	1	0	0	0	0.414236115778519	0	0	0	5.09977582646539e-30	0	0	0
FOXG1	1	1	0	0	0	0.255176234475972	0	0	0	9.27103623750887e-09	0	0	0
FRRS1L	1	0	1	0	0	0	0.291061382309754	0	0	0	2.71568325824786e-18	0	0
FTH1	1	0	1	0	0	0	0.280030344156248	0	0	0	1.29135361435694e-103	0	0
G3BP2	1	0	0	0	1	0	0	0	0.30146143089962	0	0	0	8.13823489942684e-45
GABARAP	1	0	1	0	0	0	0.255411627050622	0	0	0	1.88550216782311e-15	0	0
GABBR2	1	0	0	0	1	0	0	0	0.28903279222758	0	0	0	9.82109880840003e-40
GAP43	1	0	0	0	1	0	0	0	0.348731694058395	0	0	0	5.91315612139472e-64
GATM	1	1	0	0	0	0.353826800701873	0	0	0	9.15372916598778e-21	0	0	0
GIT1	1	1	0	0	0	0.263294826718906	0	0	0	1.34490736903962e-08	0	0	0
GLRA2	1	0	0	0	1	0	0	0	0.250899564642935	0	0	0	1.22497353274905e-67
GLS	1	0	0	0	1	0	0	0	0.409861066181289	0	0	0	3.55364242443543e-76
GLUD1	1	1	0	0	0	0.477488741562285	0	0	0	9.84088582025707e-40	0	0	0
GMFB	1	1	0	0	0	0.28832362157495	0	0	0	3.29950008858265e-13	0	0	0
GNAI2	1	1	0	0	0	0.266503925095266	0	0	0	1.81201053123013e-09	0	0	0
GNG3	1	0	0	0	1	0	0	0	0.262420005995535	0	0	0	1.26320991765206e-37
GPR37	1	0	0	1	0	0	0	0.257009109108847	0	0	0	9.08460202772693e-52	0
GPR83	1	0	1	0	0	0	0.255824523035201	0	0	0	1.38813703901923e-18	0	0
GRB2	1	0	0	0	1	0	0	0	0.260970481849154	0	0	0	5.31581764345296e-37
GRIA2	1	0	1	0	0	0	0.254855102672613	0	0	0	3.31962531915542e-16	0	0
GRIN2B	1	0	1	0	0	0	0.352442147829513	0	0	0	4.31471876376248e-31	0	0
HADHB	1	1	0	0	0	0.327771883419722	0	0	0	7.2922236366115e-20	0	0	0
HIP1R	1	1	0	0	0	0.33491735806241	0	0	0	1.16153655984211e-19	0	0	0
HMGCR	1	0	0	0	1	0	0	0	0.291815636374404	0	0	0	3.80529105717228e-47
HMGN1	1	0	1	0	0	0	0.258387550054559	0	0	0	3.59031526987585e-16	0	0
HMGN2	1	0	1	0	0	0	0.255794259897214	0	0	0	8.23977419728746e-13	0	0
HNRNPDL	1	1	0	0	0	0.258729988691996	0	0	0	8.51089901387307e-13	0	0	0
HNRNPU	1	1	0	0	0	0.26752453875802	0	0	0	6.15801075423982e-12	0	0	0
HS6ST3	1	0	0	0	1	0	0	0	0.285733023423585	0	0	0	1.81396759246694e-47
IFI6	1	1	0	0	0	0.278368428567896	0	0	0	1.58865892941607e-13	0	0	0
IFITM2	1	0	0	0	1	0	0	0	0.353755070876824	0	0	0	3.0931498132432e-58
IFNGR1	1	1	0	0	0	0.269668820847002	0	0	0	1.67778067703846e-13	0	0	0
IFRD1	1	0	1	0	0	0	0.309148370386377	0	0	0	1.61933924153624e-23	0	0
IGSF8	1	1	0	0	0	0.254038275850725	0	0	0	2.42648565288037e-10	0	0	0
IL6ST	1	1	0	0	0	0.278820025258097	0	0	0	4.75353347503314e-12	0	0	0
ISOC2	1	0	0	0	1	0	0	0	0.261204477413178	0	0	0	8.25215830344002e-48
ITGB4	1	0	0	0	1	0	0	0	0.306794629531146	0	0	0	5.48311336326556e-52
ITM2B	1	0	1	0	0	0	0.258283000320898	0	0	0	1.90072544412335e-35	0	0
ITPK1	1	1	0	0	0	0.29815701708148	0	0	0	5.79267286071457e-15	0	0	0
ITPKA	1	0	1	0	0	0	0.250048256372354	0	0	0	6.96809035798803e-13	0	0
KCNH3	1	0	1	0	0	0	0.262558224230181	0	0	0	8.45083015456283e-15	0	0
KCNJ10	1	1	0	0	0	0.493954855038673	0	0	0	5.30742655059979e-46	0	0	0
KCNN3	1	1	0	0	0	0.277336161134399	0	0	0	5.81103993077592e-18	0	0	0
KCNQ2	1	0	1	0	0	0	0.270035852848484	0	0	0	6.64046091067971e-15	0	0
KIAA1211L	1	0	0	0	1	0	0	0	0.312176369786085	0	0	0	4.1225598164046e-48
KIF1A	1	1	0	0	0	0.313789638728399	0	0	0	2.13480124603124e-32	0	0	0
KIF1B	1	1	0	0	0	0.312288477066749	0	0	0	1.38881780003282e-20	0	0	0
KIF1C	1	1	0	0	0	0.31993221783034	0	0	0	6.22657189048952e-22	0	0	0
KIF3C	1	0	0	0	1	0	0	0	0.257898689278678	0	0	0	8.67232808748737e-38
KIF5B	1	1	0	0	0	0.322875412944473	0	0	0	2.17097930436321e-16	0	0	0
KIF5C	1	1	0	0	0	0.262318821877086	0	0	0	2.05403386248809e-13	0	0	0
KLF2	1	1	0	0	0	0.318056590724187	0	0	0	1.54222553862014e-18	0	0	0
KLHL2	1	0	1	0	0	0	0.280344635322777	0	0	0	2.06201567918115e-18	0	0
KLK7	1	0	0	0	1	0	0	0	0.282299261920517	0	0	0	3.76319398174168e-80
KRTCAP2	1	0	1	0	0	0	0.264662716277429	0	0	0	3.24361423120481e-15	0	0
LAMP1	1	1	0	0	0	0.260892681654098	0	0	0	1.85267000924466e-10	0	0	0
LARP1	1	1	0	0	0	0.282145570498735	0	0	0	3.21699233500227e-12	0	0	0
LINC00205	1	0	0	0	1	0	0	0	0.258532158873408	0	0	0	3.99498832187891e-63
LMO3	1	0	1	0	0	0	0.258562214916799	0	0	0	4.98743874971055e-13	0	0
LONRF2	1	0	1	0	0	0	0.286851104601452	0	0	0	4.37091337231504e-18	0	0
LRRTM1	1	0	0	0	1	0	0	0	0.290989678371641	0	0	0	1.25654598438548e-64
LSAMP	1	1	0	0	0	0.261923847532347	0	0	0	1.38586341184588e-11	0	0	0
MACF1	1	1	0	0	0	0.297428676415006	0	0	0	9.47059021177346e-16	0	0	0
MAL	1	1	0	0	0	0.253962710416248	0	0	0	1.10883433122814e-08	0	0	0
MANF	1	0	0	0	1	0	0	0	0.280577748930717	0	0	0	5.01647383763074e-63
MAP4	1	1	0	0	0	0.253943752459309	0	0	0	1.71088400240656e-14	0	0	0
MAPRE3	1	0	1	0	0	0	0.258280643747826	0	0	0	3.91719577465124e-16	0	0
MAPT	1	0	1	0	0	0	0.27175488242418	0	0	0	1.53926959440707e-15	0	0
MBNL2	1	0	0	0	1	0	0	0	0.264881386552067	0	0	0	1.93680092050685e-33
MET	1	0	0	0	1	0	0	0	0.30886031895934	0	0	0	3.20682093214469e-58
MICOS10	1	0	1	0	0	0	0.274390618451028	0	0	0	3.66016683814951e-18	0	0
MID1IP1	1	1	0	0	0	0.411276172154099	0	0	0	8.07240747173512e-31	0	0	0
MINK1	1	0	1	0	0	0	0.256865064416095	0	0	0	1.88099985424226e-14	0	0
MLC1	1	1	0	0	0	0.412169401331044	0	0	0	5.46986740519054e-27	0	0	0
MORF4L2	1	0	0	0	1	0	0	0	0.256222319068692	0	0	0	1.22731203098041e-32
MPDZ	1	0	1	0	0	0	0.28251591174646	0	0	0	1.23653708518989e-19	0	0
MRPL41	1	1	0	0	0	0.254669405380124	0	0	0	4.580102467329e-10	0	0	0
MTSS2	1	1	0	0	0	0.269692109427448	0	0	0	6.30545725129209e-12	0	0	0
MYBPC1	1	1	0	0	0	0.387937530073805	0	0	0	2.15513903422611e-31	0	0	0
MYDGF	1	0	0	0	1	0	0	0	0.266751596045916	0	0	0	1.14088281921891e-45
MYO10	1	1	0	0	0	0.373072475543695	0	0	0	1.84315971138258e-26	0	0	0
NACC1	1	0	1	0	0	0	0.254946064883941	0	0	0	2.17515707216566e-18	0	0
NADK2	1	1	0	0	0	0.252014965672972	0	0	0	3.3719717546742e-12	0	0	0
NAPB	1	0	0	0	1	0	0	0	0.357198456936561	0	0	0	1.09896362119772e-77
NCS1	1	0	1	0	0	0	0.390783947003151	0	0	0	6.81315563430257e-44	0	0
NDUFAF8	1	0	1	0	0	0	0.315168311189183	0	0	0	1.15278048038611e-22	0	0
NDUFS5	1	0	0	0	1	0	0	0	0.367797191150121	0	0	0	1.17900075353354e-81
NEBL	1	1	0	0	0	0.345089417547916	0	0	0	5.99535316042222e-24	0	0	0
NENF	1	1	0	0	0	0.325833010162435	0	0	0	1.36937464540347e-18	0	0	0
NEUROD1	1	0	1	0	0	0	0.256950294220234	0	0	0	1.85137991720852e-18	0	0
NFIA	1	1	0	0	0	0.311803827052204	0	0	0	1.29625403926483e-18	0	0	0
NFIX	1	1	0	0	0	0.355903611572226	0	0	0	1.66675900787476e-23	0	0	0
NKAIN2	1	1	0	0	0	0.252203487661147	0	0	0	1.18510939702444e-14	0	0	0
NLGN3	1	1	0	0	0	0.312115335039734	0	0	0	1.63719189626677e-13	0	0	0
NLK	1	0	0	0	1	0	0	0	0.264546209743164	0	0	0	1.04815924387315e-36
NLRP1	1	1	0	0	0	0.256577379871923	0	0	0	7.84232482400142e-13	0	0	0
NOMO1	1	0	0	1	0	0	0	0.281274813675942	0	0	0	2.11456000245842e-33	0
NORAD	1	0	0	0	1	0	0	0	0.284098311630581	0	0	0	4.63260870044666e-64
NOTCH3	1	1	0	0	0	0.263548046408596	0	0	0	1.17052306995505e-14	0	0	0
NPTN	1	0	0	0	1	0	0	0	0.349838273302844	0	0	0	6.9862437447739e-67
NSF	1	0	0	0	1	0	0	0	0.40827534184482	0	0	0	6.88050055986268e-96
NTSR2	1	1	0	0	0	0.361968675651949	0	0	0	3.46501171029213e-24	0	0	0
NUCB1	1	0	1	0	0	0	0.251977569012566	0	0	0	1.35537209220695e-11	0	0
NUCKS1	1	1	0	0	0	0.307400229438819	0	0	0	3.66072704425974e-21	0	0	0
NUDT3	1	1	0	0	0	0.296122451421903	0	0	0	4.04440764757469e-17	0	0	0
NUDT4	1	0	0	0	1	0	0	0	0.338517467151987	0	0	0	1.76839497596417e-51
NUMBL	1	0	0	0	1	0	0	0	0.303690194933615	0	0	0	1.0060268088536e-55
OAZ1	1	0	0	0	1	0	0	0	0.354701050380288	0	0	0	3.87825792134264e-100
OGA	1	0	1	0	0	0	0.265252826686201	0	0	0	4.46994137349972e-16	0	0
OGFRL1	1	1	0	0	0	0.269287980276329	0	0	0	5.1001552154303e-13	0	0	0
OLFM2	1	1	0	0	0	0.283546235298364	0	0	0	6.05966048678766e-14	0	0	0
OST4	1	0	1	0	0	0	0.324118264583609	0	0	0	1.25845679470274e-21	0	0
P4HB	1	0	1	0	0	0	0.293461503103149	0	0	0	1.50257054304359e-17	0	0
PAK1	1	0	0	0	1	0	0	0	0.503948592581588	0	0	0	1.02669932833527e-117
PAQR6	1	1	0	0	0	0.373246588477309	0	0	0	1.03497459432201e-23	0	0	0
PCDH7	1	0	1	0	0	0	0.303860443779389	0	0	0	9.69117921555358e-20	0	0
PCSK2	1	0	0	0	1	0	0	0	0.282374347836167	0	0	0	3.18714694646191e-43
PDCD5	1	0	1	0	0	0	0.257294519838936	0	0	0	1.07052289809173e-12	0	0
PDIA3	1	0	1	0	0	0	0.278810030796406	0	0	0	1.03679691458136e-18	0	0
PDP1	1	0	0	0	1	0	0	0	0.263695897365672	0	0	0	1.57070785302679e-32
PFKFB3	1	0	0	0	1	0	0	0	0.284811073091257	0	0	0	1.5041788589233e-48
PFN1	1	0	1	0	0	0	0.336239625115954	0	0	0	1.67454327770764e-22	0	0
PHGDH	1	1	0	0	0	0.297248623828027	0	0	0	3.45207503371492e-15	0	0	0
PHLDB1	1	1	0	0	0	0.280243125505077	0	0	0	3.23732551753233e-14	0	0	0
PHLPP1	1	1	0	0	0	0.283354335597352	0	0	0	1.6735416135771e-16	0	0	0
PHYHIP	1	0	1	0	0	0	0.280858792012929	0	0	0	3.14123052547308e-35	0	0
PIP5K1C	1	0	0	0	1	0	0	0	0.276095289488455	0	0	0	2.85935943025009e-41
PJA2	1	0	0	0	1	0	0	0	0.251087382760422	0	0	0	2.56653637017588e-34
PKM	1	0	0	0	1	0	0	0	0.313112429645376	0	0	0	2.17423723716573e-93
PLEC	1	1	0	0	0	0.330219977337368	0	0	0	4.44032898991582e-20	0	0	0
PLEKHA2	1	0	1	0	0	0	0.356913066011047	0	0	0	8.81133741431689e-31	0	0
PLXNB1	1	1	0	0	0	0.423191800542645	0	0	0	1.0576322366229e-31	0	0	0
PNCK	1	0	1	0	0	0	0.273438723876923	0	0	0	2.14354443149568e-15	0	0
PODXL2	1	1	0	0	0	0.282026591846478	0	0	0	3.68222562931437e-13	0	0	0
POLR2J	1	0	1	0	0	0	0.28782353624321	0	0	0	2.78796121495399e-19	0	0
POLR2L	1	0	1	0	0	0	0.407604881559258	0	0	0	2.09297600500672e-37	0	0
PPFIA2	1	0	0	0	1	0	0	0	0.457770592472202	0	0	0	1.67793726831452e-97
PPIA	1	0	0	0	1	0	0	0	0.38475843573076	0	0	0	6.37200793873537e-152
PPID	1	0	0	0	1	0	0	0	0.274324108450121	0	0	0	1.93914165936626e-50
PPP1CB	1	1	0	0	0	0.257425196794263	0	0	0	7.11712351160272e-12	0	0	0
PPP1R9B	1	1	0	0	0	0.280815837694683	0	0	0	6.33402117697651e-11	0	0	0
PPP3CB	1	0	1	0	0	0	0.342989216798767	0	0	0	1.04009636149517e-28	0	0
PRDX6	1	1	0	0	0	0.292436575249262	0	0	0	1.30603520505553e-12	0	0	0
PREX1	1	1	0	0	0	0.252331282343741	0	0	0	2.38054330158513e-09	0	0	0
PRKCSH	1	1	0	0	0	0.254300790618688	0	0	0	3.45033835616436e-11	0	0	0
PRNP	1	0	1	0	0	0	0.276941557580048	0	0	0	6.18664397186514e-38	0	0
PRR18	1	0	0	1	0	0	0	0.263651126194344	0	0	0	5.70762733381316e-59	0
PRRC2B	1	1	0	0	0	0.262435046486276	0	0	0	7.57404932834426e-12	0	0	0
PRRT1	1	0	0	0	1	0	0	0	0.379137330320051	0	0	0	6.40927470010344e-66
PSMD8	1	0	0	0	1	0	0	0	0.261970413825654	0	0	0	6.19657835151507e-36
PTEN	1	1	0	0	0	0.250630542523105	0	0	0	4.12718724043502e-09	0	0	0
PTGDS	1	1	0	0	0	0.491809708243295	0	0	0	2.37932328760308e-94	0	0	0
PTN	1	1	0	0	0	0.37960460606146	0	0	0	1.48003248361787e-18	0	0	0
PTPA	1	0	1	0	0	0	0.277428641467231	0	0	0	2.97512237820507e-18	0	0
PTPRR	1	0	1	0	0	0	0.255230266811322	0	0	0	1.14201352776861e-19	0	0
PXK	1	1	0	0	0	0.272718662845164	0	0	0	3.73920230964375e-15	0	0	0
RAB31	1	1	0	0	0	0.331069522881624	0	0	0	6.80455806920642e-21	0	0	0
RAMP1	1	0	1	0	0	0	0.403350822671192	0	0	0	1.9825430464292e-37	0	0
RAP1GAP	1	1	0	0	0	0.29052619633029	0	0	0	1.58998251421013e-14	0	0	0
RAP2B	1	0	1	0	0	0	0.273438723876923	0	0	0	9.21821842892682e-19	0	0
RAPGEF4	1	1	0	0	0	0.290068825373688	0	0	0	2.07921786001381e-14	0	0	0
RBM14	1	0	1	0	0	0	0.308066639087568	0	0	0	9.56111487845999e-24	0	0
RBP4	1	0	0	0	1	0	0	0	0.310824590843467	0	0	0	7.65691853632602e-64
RFK	1	0	0	0	1	0	0	0	0.283751189579214	0	0	0	5.24115323632427e-51
RGS5	1	1	0	0	0	0.314629104389444	0	0	0	6.3608358695707e-12	0	0	0
RHOA	1	1	0	0	0	0.301066381949958	0	0	0	7.24061116403904e-17	0	0	0
RHOBTB3	1	1	0	0	0	0.354635071918825	0	0	0	6.52353478262734e-22	0	0	0
RHOC	1	0	1	0	0	0	0.357330995849926	0	0	0	1.48184538300717e-29	0	0
RPL10	1	0	1	0	0	0	0.32080465800577	0	0	0	1.39309434391096e-48	0	0
RPL18A	1	0	1	0	0	0	0.324076949902448	0	0	0	1.76861565027663e-37	0	0
RPL24	1	0	1	0	0	0	0.277848146882679	0	0	0	1.55665411373339e-26	0	0
RPL27	1	0	1	0	0	0	0.318326515903423	0	0	0	3.93163193098578e-31	0	0
RPL28	1	0	1	0	0	0	0.336459321320926	0	0	0	8.32646194961059e-57	0	0
RPL35	1	0	1	0	0	0	0.305369670446292	0	0	0	3.95115332559824e-34	0	0
RPL5	1	0	1	0	0	0	0.29159060443224	0	0	0	1.84388649404687e-26	0	0
RPL7A	1	0	1	0	0	0	0.259490650569529	0	0	0	6.93980551092455e-27	0	0
RPL8	1	0	1	0	0	0	0.257731203974626	0	0	0	5.39863723713649e-22	0	0
RPS13	1	1	0	0	0	0.267993638827287	0	0	0	1.45853083393113e-16	0	0	0
RPS14	1	0	1	0	0	0	0.306253284173477	0	0	0	4.19549878545741e-38	0	0
RPS15A	1	0	1	0	0	0	0.26790820692998	0	0	0	2.65448187979231e-16	0	0
RPS17	1	0	1	0	0	0	0.344053186036003	0	0	0	2.45437745074802e-34	0	0
RPS29	1	1	0	0	0	0.324000272004942	0	0	0	1.87956998839931e-32	0	0	0
RPSA	1	0	1	0	0	0	0.276427145973964	0	0	0	1.81473438286448e-22	0	0
RTL8C	1	0	0	0	1	0	0	0	0.301350349949103	0	0	0	1.00174317966154e-56
RTN1	1	0	0	0	1	0	0	0	0.438494808779756	0	0	0	5.35905041976156e-169
RTN4	1	0	0	0	1	0	0	0	0.445863182242409	0	0	0	7.54313957579681e-170
RTN4RL2	1	0	0	0	1	0	0	0	0.252017031941185	0	0	0	4.00123365670874e-43
RTP5	1	0	1	0	0	0	0.31541366612646	0	0	0	2.66838244913609e-34	0	0
S100A1	1	0	0	0	1	0	0	0	0.310130401136897	0	0	0	1.23440917418135e-44
SARAF	1	0	1	0	0	0	0.256159268071008	0	0	0	2.26399370910807e-28	0	0
SASH1	1	1	0	0	0	0.379511144263901	0	0	0	2.34954938419982e-28	0	0	0
SCG5	1	0	0	0	1	0	0	0	0.261861266665445	0	0	0	6.19005824491263e-37
SELENOP	1	1	0	0	0	0.401805414287097	0	0	0	5.5510842984648e-26	0	0	0
SELENOW	1	0	0	0	1	0	0	0	0.279217050428584	0	0	0	1.6332543243252e-80
SEMA4D	1	1	0	0	0	0.273077582225602	0	0	0	1.16638534843634e-14	0	0	0
SEPTIN2	1	1	0	0	0	0.431799770155289	0	0	0	1.45303259457164e-33	0	0	0
SEPTIN7	1	1	0	0	0	0.273433055778962	0	0	0	1.09932020859358e-17	0	0	0
SERPINA1	1	0	0	0	1	0	0	0	0.271387741559881	0	0	0	9.1148830667984e-78
SERPING1	1	0	1	0	0	0	0.252811767788361	0	0	0	1.75720883036168e-14	0	0
SESN3	1	0	1	0	0	0	0.280086558917568	0	0	0	2.56294792832519e-16	0	0
SFPQ	1	0	1	0	0	0	0.291382265297621	0	0	0	4.83571620619096e-15	0	0
SFXN5	1	1	0	0	0	0.295667595830709	0	0	0	1.68680312404274e-13	0	0	0
SGSM2	1	1	0	0	0	0.254873830360971	0	0	0	9.89600067324306e-10	0	0	0
SH3GL3	1	1	0	0	0	0.281451119958243	0	0	0	8.08468203414457e-13	0	0	0
SHISA4	1	0	1	0	0	0	0.262624191809677	0	0	0	1.25192742081832e-13	0	0
SHISA5	1	0	1	0	0	0	0.256773344700018	0	0	0	3.95390532174786e-15	0	0
SHISAL1	1	1	0	0	0	0.283482936814341	0	0	0	5.29340656113326e-14	0	0	0
SIRPA	1	0	1	0	0	0	0.29991798862837	0	0	0	4.49427627196522e-25	0	0
SLC1A4	1	1	0	0	0	0.296370583557375	0	0	0	2.94381494380012e-15	0	0	0
SLC22A17	1	0	0	0	1	0	0	0	0.260446643240231	0	0	0	2.82442499426312e-54
SLC25A18	1	1	0	0	0	0.275879482217303	0	0	0	3.17474231648818e-10	0	0	0
SLC25A23	1	0	1	0	0	0	0.342824450475093	0	0	0	7.06639670617406e-27	0	0
SLC26A4-AS1	1	0	0	0	1	0	0	0	0.255204611102944	0	0	0	9.5758940127497e-41
SLC38A2	1	1	0	0	0	0.256796821441715	0	0	0	6.62334791283636e-11	0	0	0
SLC39A10	1	0	0	0	1	0	0	0	0.398369686879548	0	0	0	4.36828887081937e-61
SLC39A12	1	1	0	0	0	0.286666634971732	0	0	0	3.68712937101236e-14	0	0	0
SLC4A4	1	1	0	0	0	0.311942044958045	0	0	0	1.34471835824343e-16	0	0	0
SLC6A8	1	0	1	0	0	0	0.253933229252667	0	0	0	1.20360777306009e-12	0	0
SLC7A5	1	0	1	0	0	0	0.279003234310361	0	0	0	2.29663617512265e-14	0	0
SLC9A7	1	0	1	0	0	0	0.253790663253385	0	0	0	1.75612135377073e-15	0	0
SMARCD3	1	1	0	0	0	0.289806296080717	0	0	0	1.36493510562927e-12	0	0	0
SOD1	1	0	0	0	1	0	0	0	0.357253336370331	0	0	0	1.23033784578656e-101
SORBS1	1	0	1	0	0	0	0.273303047871017	0	0	0	5.67202201563056e-16	0	0
SOX10	1	1	0	0	0	0.252942651164367	0	0	0	2.19434112457139e-15	0	0	0
SOX2	1	1	0	0	0	0.315372666910041	0	0	0	2.73536885675266e-17	0	0	0
SOX2-OT	1	1	0	0	0	0.372657984426083	0	0	0	1.7664791137878e-25	0	0	0
SOX8	1	1	0	0	0	0.262554950953233	0	0	0	1.49401674074787e-12	0	0	0
SPART	1	0	1	0	0	0	0.262736765003188	0	0	0	3.65913412642914e-17	0	0
SPINT2	1	0	0	0	1	0	0	0	0.252916724926199	0	0	0	4.52982130413882e-31
SPOCK2	1	1	0	0	0	0.275254639691021	0	0	0	3.20863028816358e-14	0	0	0
SPTAN1	1	0	0	0	1	0	0	0	0.263797944878446	0	0	0	2.40083329188495e-49
SPTBN1	1	1	0	0	0	0.350157811058478	0	0	0	5.04878790167281e-37	0	0	0
SQSTM1	1	0	1	0	0	0	0.313109451098247	0	0	0	1.47075159477901e-22	0	0
SRRM2	1	1	0	0	0	0.262394823788489	0	0	0	2.53976222309747e-12	0	0	0
SRSF2	1	1	0	0	0	0.271931315931878	0	0	0	4.33919371092147e-13	0	0	0
SSTR1	1	0	0	0	1	0	0	0	0.332140034204616	0	0	0	2.58014618334743e-84
ST6GALNAC6	1	0	1	0	0	0	0.253998349799702	0	0	0	6.72670409233269e-13	0	0
ST8SIA3	1	0	1	0	0	0	0.294720415966397	0	0	0	5.79384768231786e-18	0	0
STAB1	1	0	0	0	1	0	0	0	0.257454711855104	0	0	0	2.62217200036055e-71
STMN2	1	0	0	1	0	0	0	0.368214900819037	0	0	0	4.64587604991849e-57	0
STXBP1	1	0	0	0	1	0	0	0	0.310457274970959	0	0	0	4.85765889541021e-76
SUGT1	1	0	1	0	0	0	0.255491578134506	0	0	0	1.23577091759708e-12	0	0
SUN2	1	1	0	0	0	0.335216052473022	0	0	0	4.55820601887454e-16	0	0	0
SURF1	1	1	0	0	0	0.274161390609745	0	0	0	2.20275081976791e-13	0	0	0
SVOP	1	0	0	0	1	0	0	0	0.346198978627748	0	0	0	8.59009297119538e-70
SYNGAP1	1	1	0	0	0	0.257361496969969	0	0	0	1.00132524920636e-10	0	0	0
SYNPO	1	0	1	0	0	0	0.50619142539903	0	0	0	8.39632855711219e-61	0	0
SYT1	1	0	0	1	0	0	0	0.278541645191833	0	0	0	5.20498839628697e-54	0
SYT5	1	0	0	0	1	0	0	0	0.315770607510066	0	0	0	3.98296243838178e-51
TAGLN3	1	0	0	0	1	0	0	0	0.270898122500107	0	0	0	3.51939922655709e-48
TCF4	1	1	0	0	0	0.300024901199664	0	0	0	2.25885351637889e-15	0	0	0
THOC3	1	0	1	0	0	0	0.252257023788485	0	0	0	1.15543493669935e-16	0	0
THRB	1	0	0	0	1	0	0	0	0.27655636603109	0	0	0	4.26004346282199e-43
TIMP3	1	1	0	0	0	0.388409647529323	0	0	0	2.51651289052078e-26	0	0	0
TMA7	1	0	1	0	0	0	0.27933120761116	0	0	0	3.93276523251932e-25	0	0
TMED9	1	0	1	0	0	0	0.304991117458237	0	0	0	2.63844318742607e-22	0	0
TMEFF2	1	0	0	0	1	0	0	0	0.25581766906195	0	0	0	1.48514607171946e-46
TMEM144	1	0	0	1	0	0	0	0.284773245576847	0	0	0	2.7920436139161e-44	0
TMEM151A	1	0	0	0	1	0	0	0	0.285134156262698	0	0	0	1.73027590901152e-54
TMEM165	1	0	0	1	0	0	0	0.254707343488827	0	0	0	2.04193962554445e-32	0
TMEM176B	1	0	1	0	0	0	0.330573887580276	0	0	0	5.72854565948034e-29	0	0
TMEM246	1	0	0	0	1	0	0	0	0.284809628184867	0	0	0	9.83863136169128e-46
TMEM30A	1	0	1	0	0	0	0.261466668830158	0	0	0	6.49574652779635e-13	0	0
TMEM50A	1	0	1	0	0	0	0.26413633121461	0	0	0	2.01884094852603e-15	0	0
TMSB10	1	0	0	0	1	0	0	0	0.504611968600425	0	0	0	4.39067817539599e-283
TOLLIP	1	0	0	0	1	0	0	0	0.312245799808584	0	0	0	2.37660913491949e-49
TPD52L1	1	1	0	0	0	0.337612555095588	0	0	0	8.52204638796077e-19	0	0	0
TPI1	1	0	0	0	1	0	0	0	0.429751923951154	0	0	0	5.38081004803852e-159
TPP1	1	0	1	0	0	0	0.311110149197281	0	0	0	1.71465999436925e-21	0	0
TPPP	1	1	0	0	0	0.268268621642594	0	0	0	6.36809256971101e-14	0	0	0
TPPP3	1	1	0	0	0	0.290334249855346	0	0	0	1.06873558124542e-17	0	0	0
TRIM8	1	1	0	0	0	0.270427250180398	0	0	0	5.48868531879898e-14	0	0	0
TSPO	1	0	1	0	0	0	0.332260755997071	0	0	0	3.22413067175236e-25	0	0
TSPYL4	1	0	1	0	0	0	0.319703143430875	0	0	0	5.75787149550735e-22	0	0
TTC3	1	1	0	0	0	0.298406073124012	0	0	0	4.61919982975739e-18	0	0	0
TTYH3	1	0	1	0	0	0	0.306288375552022	0	0	0	3.59555635017981e-22	0	0
TUBA4A	1	0	0	1	0	0	0	0.254675679933439	0	0	0	5.22481600088726e-24	0
TUBB2A	1	0	0	1	0	0	0	0.338587721720686	0	0	0	7.66249601300868e-65	0
TUBB3	1	0	0	1	0	0	0	0.405718775809031	0	0	0	3.84937247331809e-55	0
TXN	1	0	0	0	1	0	0	0	0.280884267602623	0	0	0	9.54620207867611e-42
UBE2B	1	0	1	0	0	0	0.26612976593092	0	0	0	9.16957001912532e-15	0	0
UCHL1	1	0	0	0	1	0	0	0	0.420519314788671	0	0	0	2.50509070370888e-190
USP22	1	1	0	0	0	0.269039358350857	0	0	0	8.73155444570702e-15	0	0	0
VEGFB	1	1	0	0	0	0.253820485895208	0	0	0	4.56569230005357e-09	0	0	0
VPS35	1	0	0	0	1	0	0	0	0.254235349905697	0	0	0	5.56702261905747e-31
VSTM2B	1	0	0	0	1	0	0	0	0.265858612132335	0	0	0	2.0058422882694e-50
WASF3	1	1	0	0	0	0.373999439100616	0	0	0	9.94218250468909e-25	0	0	0
WNK1	1	1	0	0	0	0.369287427567806	0	0	0	2.64139658177488e-23	0	0	0
YWHAG	1	0	0	0	1	0	0	0	0.32445494203633	0	0	0	1.69949206846351e-93
ZDHHC14	1	0	1	0	0	0	0.272523810729846	0	0	0	1.47475298989903e-17	0	0
ZEB2	1	1	0	0	0	0.30886142323349	0	0	0	5.24556435678034e-14	0	0	0
ZFR	1	0	1	0	0	0	0.333206693848236	0	0	0	2.13863537642491e-22	0	0
ZNF706	1	0	1	0	0	0	0.252445772281678	0	0	0	1.19425199260717e-11	0	0

## Sheet: Layer 3_AD_down_DEG
This spreadsheet is derived from DEGs analysis by comparing gene expression between AD and CT from Layer 3. Column A indicates gene ID. Column B indicates the number of overlapping genes from four comparisons. Column G to column J indicates the log fold change of four comparisons.
Gene	contribution summary					logFC (e as base, cutoff >= 0.25)				adjusted p-value (Wilcoxon test, cutoff <= 0.05)
ID	overlap	AD1 vs CT1	AD2 vs CT2	AD1 vs CT2	AD2 vs CT2	Layer 3_down_logFC_AD1_CT1	Layer 3_down_logFC_AD2_CT1	Layer 3_down_logFC_AD1_CT2	Layer 3_down_logFC_AD2_CT2	Layer 3down_Adj.pval_AD1_CT1	Layer 3down_Adj.pval_AD2_CT1	Layer 3down_Adj.pval_AD1_CT2	Layer 3down_Adj.pval_AD2_CT2
CARTPT	4	1	1	1	1	-1.26192285207143	-1.242394494459	-0.349009415795496	-0.32948105818307	3.66336436283764e-157	1.37705437067398e-199	1.66857345207032e-45	1.501509176885e-59
CHGA	4	1	1	1	1	-0.347109225340287	-0.580978502448076	-0.513415867836647	-0.747285144944435	7.72616021938012e-28	1.18940228451308e-82	7.44732350113281e-90	7.08063210419763e-214
HAPLN4	4	1	1	1	1	-0.460974653435545	-0.429338458809906	-0.334127767159058	-0.302491572533419	1.41363251389234e-57	2.699135763256e-60	2.57523318051911e-42	1.00499096905724e-45
SPARCL1	4	1	1	1	1	-0.291122060015742	-0.254783323711109	-0.294640939172128	-0.258302202867495	9.37579627269949e-58	1.3079879112611e-57	1.8695313070633e-87	2.10426340281261e-97
DEPP1	3	1	1	1	0	-0.621627656469452	-0.278679766899788	-0.252814271849777	0	7.26834362476326e-84	2.02171818582914e-18	1.65654943168814e-26	0
SCN1B	3	1	1	1	0	-0.489360536558823	-0.412618392940747	-0.302390743952112	0	1.67341144284626e-47	1.6698944044497e-42	4.62227603652043e-27	0
AGT	2	0	0	1	1	0	0	-0.376369573697662	-0.51519500697446	0	0	9.89992361796558e-55	5.8801819886863e-122
AL121820.2	2	0	0	1	1	0	0	-0.387626068951726	-0.384143805796246	0	0	3.17928950463848e-52	1.38816168433918e-69
CLDN5	2	0	0	1	1	0	0	-0.308443093054229	-0.267044910744063	0	0	1.76574987132425e-32	1.26163104945194e-29
ENHO	2	0	0	1	1	0	0	-0.332236786003062	-0.717465328336947	0	0	1.89017468489837e-52	1.61346643253903e-229
F3	2	1	1	0	0	-0.304169405591579	-0.386091845884037	0	0	2.01905245380115e-15	1.62798341456433e-32	0	0
GADD45B	2	1	1	0	0	-0.433177099875201	-0.334278781668561	0	0	1.16556702352042e-48	5.11467496210757e-33	0	0
GJB6	2	0	0	1	1	0	0	-0.332542958481323	-0.408700837243558	0	0	3.11755473047401e-32	6.77194991090951e-65
HBA1	2	0	0	1	1	0	0	-0.300805303606112	-0.421293674292143	0	0	1.78992421186369e-13	8.7001090092396e-47
HBA2	2	0	0	1	1	0	0	-0.390764423497452	-0.596590219085981	0	0	9.87101945320999e-15	1.25304648668537e-63
KCNS1	2	1	0	1	0	-0.325488210246029	0	-0.338217806274855	0	5.17446605465372e-30	0	1.4900477912045e-41	0
MT1H	2	0	0	1	1	0	0	-0.373654983671351	-0.372099920970983	0	0	1.11701053784546e-53	2.27059924775221e-72
NAT8L	2	0	0	1	1	0	0	-0.298476107645697	-0.28719231350201	0	0	3.68471222114449e-37	1.31666939770197e-47
NEFH	2	1	1	0	0	-0.367560455569011	-0.367082883485644	0	0	3.7826825785645e-27	1.77515306258442e-32	0	0
PPP1R1B	2	0	0	1	1	0	0	-0.427554903354764	-0.523307673063471	0	0	3.31804964583535e-67	1.05694885691032e-129
PRXL2A	2	0	0	1	1	0	0	-0.275240570432309	-0.322070036668829	0	0	7.74488691151489e-27	5.60934973032474e-51
PVALB	2	1	1	0	0	-0.25664468087775	-0.287699999542304	0	0	1.48039800911876e-17	9.35598502168731e-34	0	0
RPS26	2	0	0	1	1	0	0	-0.570206501359889	-0.354129405559708	0	0	3.161610960928e-116	1.30248539252515e-71
SCRG1	2	0	0	1	1	0	0	-0.39519072016039	-0.429069976111299	0	0	6.29847150952318e-60	1.56529992231594e-90
TESPA1	2	1	0	1	0	-0.437622027727328	0	-0.424124433882692	0	4.05022497543434e-46	0	1.18032967312607e-57	0
TSC22D1	2	1	0	1	0	-0.43471177455109	0	-0.312075273824567	0	1.36419212644196e-81	0	3.88449247234524e-72	0
TSC22D3	2	0	0	1	1	0	0	-0.372082047920287	-0.399321500829576	0	0	2.547678657204e-48	5.46803651496439e-73
VAMP1	2	1	1	0	0	-0.362807851212042	-0.266510869326356	0	0	1.97300404218043e-35	1.57524947453573e-21	0	0
VSNL1	2	1	0	1	0	-0.583517564181248	0	-0.265863252702353	0	5.22520117169263e-112	0	2.61430350118472e-53	0
VWF	2	0	0	1	1	0	0	-0.458585751483949	-0.392677607745823	0	0	8.47575580227554e-62	1.90422859451518e-51
WIF1	2	0	0	1	1	0	0	-0.406308886291084	-0.329587304682578	0	0	3.4362746905587e-56	3.52244615224201e-48
ZFP36	2	1	1	0	0	-0.326769509150919	-0.257143462279787	0	0	1.37133126295339e-29	1.25481714239381e-19	0	0
ACBD7	1	0	0	0	1	0	0	0	-0.356495332742118	0	0	0	5.03971267936968e-52
ALDH1L1	1	0	0	1	0	0	0	-0.280832859395184	0	0	0	8.18897413340223e-25	0
ANGPTL4	1	1	0	0	0	-0.268688286301461	0	0	0	2.69025033318057e-12	0	0	0
BAG3	1	0	0	1	0	0	0	-0.273248611905507	0	0	0	1.48609926009033e-26	0
C11orf96	1	0	1	0	0	0	-0.292671012264325	0	0	0	7.1184706851801e-27	0	0
C1orf122	1	0	0	0	1	0	0	0	-0.251645176866619	0	0	0	9.25230783766151e-26
CABP1	1	1	0	0	0	-0.445168702793741	0	0	0	2.97529754279966e-49	0	0	0
CAMK2A	1	0	0	1	0	0	0	-0.316883069686816	0	0	0	1.20576996803124e-44	0
CAMK2G	1	0	0	0	1	0	0	0	-0.338229335674928	0	0	0	5.13080803110528e-48
CAMKK2	1	1	0	0	0	-0.339245488880072	0	0	0	7.02113654964025e-28	0	0	0
CIT	1	0	0	1	0	0	0	-0.264045109612525	0	0	0	1.11334070595741e-19	0
COPS9	1	0	0	1	0	0	0	-0.308599733041824	0	0	0	1.08297751111906e-49	0
COX7A1	1	1	0	0	0	-0.372540636381985	0	0	0	1.15797160222132e-32	0	0	0
CRLF1	1	0	0	1	0	0	0	-0.280117764005984	0	0	0	4.94349408370065e-31	0
EFEMP1	1	0	0	0	1	0	0	0	-0.254151894470457	0	0	0	1.60409337932232e-24
GABRD	1	1	0	0	0	-0.304593243296586	0	0	0	2.90906694954502e-24	0	0	0
GSTM3	1	0	0	1	0	0	0	-0.355010862109957	0	0	0	1.73004981247949e-40	0
GSTM5	1	0	0	0	1	0	0	0	-0.26754936087752	0	0	0	1.39216514653386e-33
LINC00507	1	1	0	0	0	-0.269389011571843	0	0	0	9.11735388323798e-36	0	0	0
LINC00632	1	0	0	0	1	0	0	0	-0.346244795639384	0	0	0	4.05921095992379e-40
LINC01578	1	0	0	0	1	0	0	0	-0.268594010243544	0	0	0	1.97447127330264e-26
LMO4	1	0	0	0	1	0	0	0	-0.326506951614395	0	0	0	1.20906840961525e-53
LRATD1	1	0	0	1	0	0	0	-0.290084750308627	0	0	0	2.03036430138976e-28	0
MSI2	1	0	0	0	1	0	0	0	-0.300055895357925	0	0	0	2.60994729226393e-37
MT1X	1	0	0	0	1	0	0	0	-0.321495085094754	0	0	0	2.18399483150383e-47
NGEF	1	1	0	0	0	-0.296447359497668	0	0	0	1.1478599999427e-21	0	0	0
NRGN	1	1	0	0	0	-0.362134038400772	0	0	0	4.51207266682816e-63	0	0	0
NSG1	1	1	0	0	0	-0.250379462898645	0	0	0	1.22222576882197e-16	0	0	0
PDZD2	1	0	0	1	0	0	0	-0.318399455561518	0	0	0	2.01083561634897e-32	0
PRELP	1	0	0	0	1	0	0	0	-0.280181580704469	0	0	0	4.62064704674637e-31
PTK2B	1	0	0	1	0	0	0	-0.285923004223747	0	0	0	3.99946758185647e-33	0
RBM3	1	0	0	0	1	0	0	0	-0.32098294333786	0	0	0	8.22204884926951e-53
RCAN2	1	1	0	0	0	-0.404566786612292	0	0	0	1.30045525315939e-40	0	0	0
RIDA	1	0	0	0	1	0	0	0	-0.279118052337912	0	0	0	1.72648179765846e-32
RPS27	1	0	0	1	0	0	0	-0.278421662750952	0	0	0	1.1634608604677e-66	0
SAT1	1	0	0	0	1	0	0	0	-0.284308403350586	0	0	0	3.29725661354761e-32
SCARA3	1	0	0	1	0	0	0	-0.299567016735814	0	0	0	3.61703976592473e-28	0
SCG3	1	0	0	1	0	0	0	-0.445058197801444	0	0	0	8.42618842953334e-70	0
SLC1A2	1	0	0	0	1	0	0	0	-0.446280570889762	0	0	0	1.88810704129348e-165
SLC24A2	1	0	1	0	0	0	-0.299259453299692	0	0	0	6.8104646199746e-26	0	0
SNAP25	1	1	0	0	0	-0.293298124891586	0	0	0	7.27745577192758e-56	0	0	0
SRP14	1	0	0	1	0	0	0	-0.383247246150946	0	0	0	9.97420252015038e-75	0
STON2	1	0	0	1	0	0	0	-0.252395460017811	0	0	0	1.34399543847279e-19	0
TNFRSF6B	1	1	0	0	0	-0.251697154572495	0	0	0	4.9474087792075e-17	0	0	0
ZNF365	1	1	0	0	0	-0.268236419064552	0	0	0	1.70704701161562e-17	0	0	0

## Sheet: Layer 4_AD_up_DEG
This spreadsheet is derived from DEGs analysis by comparing gene expression between AD and CT from Layer 4. Column A indicates gene ID. Column B indicates the number of overlapping genes from four comparisons. Column G to column J indicates the log fold change of four comparisons.
Gene	contribution summary					logFC (e as base, cutoff >= 0.25)				adjusted p-value (Wilcoxon test, cutoff <= 0.05)
ID	overlap	AD1 vs CT1	AD2 vs CT2	AD1 vs CT2	AD2 vs CT2	Layer 4_up_logFC_AD1_CT1	Layer 4_up_logFC_AD2_CT1	Layer 4_up_logFC_AD1_CT2	Layer 4_up_logFC_AD2_CT2	Layer 4up_Adj.pval_AD1_CT1	Layer 4up_Adj.pval_AD2_CT1	Layer 4up_Adj.pval_AD1_CT2	Layer 4up_Adj.pval_AD2_CT2
ADGRL3	4	1	1	1	1	0.30383991306677	0.302480293550731	0.255274829497003	0.253915209980963	3.18444781428133e-06	1.65987389190272e-08	1.16165775582005e-07	6.83716335145568e-12
AEBP1	4	1	1	1	1	0.25605278461699	0.332235914279955	0.299177211250745	0.37536034091371	9.96247614097662e-08	7.16346696069002e-15	3.69485001955513e-28	4.24852660662401e-46
APLP1	4	1	1	1	1	0.469339817308657	0.523551829294444	0.444068565665206	0.498280577650994	1.58046249624769e-28	5.99653659975325e-38	3.75509820740717e-38	3.53253862532801e-58
APOC1	4	1	1	1	1	0.5607589666039	0.601293563507578	0.320041437217229	0.360576034120907	8.09567300124212e-28	3.04183208666714e-32	3.65922215151617e-14	1.16812225061666e-20
APP	4	1	1	1	1	0.384689103902432	0.278908159050087	0.372298134242848	0.266517189390503	1.03620955311574e-22	8.07808101289028e-14	2.15798881894748e-31	1.56950796232024e-22
ARPP19	4	1	1	1	1	0.381175180494417	0.502406621419929	0.265390490958961	0.386621931884472	4.40278500952944e-19	7.38763525892499e-39	2.53345005614597e-13	4.3014903477766e-42
ATP2B4	4	1	1	1	1	0.367435748093843	0.422304489702167	0.412370129972837	0.467238871581161	2.60000139567129e-08	1.14489509059001e-17	8.26970689199405e-18	6.84637261004122e-37
AUXG01000058.1	4	1	1	1	1	0.44171988970791	0.425335759566012	0.297160816406325	0.280776686264427	3.04892580592103e-20	4.16706133895011e-19	1.7254551058746e-13	3.94620729690837e-14
BAIAP3	4	1	1	1	1	0.506389381649519	0.490908083035217	0.487307196480681	0.471825897866379	1.24277285099645e-20	3.13758296000304e-25	9.62419715770272e-29	1.60771872316526e-39
BIN1	4	1	1	1	1	0.350613285875188	0.301874765504404	0.360143309726101	0.311404789355317	6.09836597641161e-08	4.63023019563057e-09	8.48788272823076e-14	5.83536646245307e-18
C14orf132	4	1	1	1	1	0.378643255837845	0.399749279482412	0.301760162380402	0.322866186024969	3.71891232309299e-14	1.21180330229628e-16	2.41704560397719e-13	8.7146161506282e-19
C1QB	4	1	1	1	1	0.340025666361374	1.0436888195415	0.28533176038359	0.988994913563717	5.608487519893e-06	2.74815664427851e-65	4.07240603207371e-07	8.50456050462456e-106
C3	4	1	1	1	1	0.448858109330756	0.752430195601277	0.31078394391518	0.614356030185701	4.43740043563064e-14	4.80853533263987e-40	2.98056072450154e-10	4.58562989529538e-50
CD74	4	1	1	1	1	0.792380514663849	0.873369247909793	0.402455466503485	0.48344419974943	1.52108940471521e-32	5.12716059364146e-50	4.3909356321857e-14	7.71885407603218e-33
CLDND1	4	1	1	1	1	0.310345386356029	0.250119075436638	0.348030089693966	0.287803778774575	0.00109164600155007	0.00764332048235499	8.57468817768988e-12	4.58318686332539e-13
CNR1	4	1	1	1	1	0.262795016185399	0.310191326573712	0.275472853710587	0.3228691640989	0.00108572950614745	0.000114522933991047	3.72735477972452e-10	8.21243629784341e-14
CORO1A	4	1	1	1	1	0.25098214716803	0.301809227649247	0.279103407209736	0.329930487690953	0.000574520758383055	8.39889878841668e-09	1.92416330665672e-11	1.15310046138069e-22
CPNE6	4	1	1	1	1	0.622776619321475	0.607041893853005	0.368085307788643	0.352350582320173	3.36813826702969e-28	1.66674226114252e-35	2.10779403304389e-15	3.54585168168254e-22
CRYAB	4	1	1	1	1	0.352734336215601	1.09899652277899	0.423084557256443	1.16934674381983	7.82899334591865e-10	2.93084306765913e-85	5.70894812974809e-24	5.3997053234481e-148
CTXN1	4	1	1	1	1	0.573794154769309	0.579905958478007	0.493406057805941	0.499517861514639	4.22279753768624e-27	1.77235368499584e-36	3.8832710326923e-31	1.62873572826064e-47
FABP7	4	1	1	1	1	0.542925280895484	0.648059289128617	0.29238556339991	0.397519571633044	2.62926554574361e-24	7.1970973888609e-36	1.52760895367764e-09	4.99079114046383e-24
GABRA5	4	1	1	1	1	0.391451143213791	0.261410155529037	0.507200846345504	0.37715985866075	1.61335684601991e-12	3.31154984439815e-05	8.33877289064902e-35	1.22253982386556e-27
GFAP	4	1	1	1	1	0.543477599218011	0.793343268648977	1.25467742544057	1.50454309487154	6.24605933849163e-58	7.29266661473617e-94	2.50082330997326e-111	8.50180514551889e-160
GNAO1	4	1	1	1	1	0.324215436047952	0.33016562867979	0.264139354509871	0.270089547141709	1.07505683944415e-08	5.85077897497121e-14	1.87664911697553e-08	7.59093993841916e-16
GNG2	4	1	1	1	1	0.508820740941679	0.553125182704819	0.262012109367334	0.306316551130474	8.47627162181675e-21	4.46691971814443e-26	3.88305945537974e-07	1.28286515040195e-13
GRIA1	4	1	1	1	1	0.480575622217316	0.28360521378864	0.500156667416423	0.303186258987746	1.74669868959648e-18	1.01820034941921e-06	3.78504335933967e-32	3.41028696247331e-17
HPCAL4	4	1	1	1	1	0.457763277669163	0.486923738162483	0.432142193367717	0.461302653861037	6.38962282725581e-17	1.01600172551704e-27	3.8385667977801e-23	2.22442538347018e-42
ICAM5	4	1	1	1	1	0.382595000363255	0.445014016487055	0.309044858183821	0.371463874307621	1.82569027937546e-10	2.56478064659516e-19	2.18900441356329e-11	5.96423844626058e-25
KCNG1	4	1	1	1	1	0.259716475436893	0.269521303646081	0.250255666932664	0.260060495141852	1.11872101260926e-06	2.18304698431729e-09	9.7164578849149e-13	2.12274988802389e-19
LINC02607	4	1	1	1	1	0.30807523782149	0.368928619885475	0.311978951301964	0.372832333365949	9.89531426456664e-08	1.02547764189535e-13	2.76757433754849e-15	4.495581144887e-28
LINGO1	4	1	1	1	1	0.256734633030373	0.341405104941238	0.295070542932331	0.379741014843195	0.0282058514147242	8.81671807674872e-13	4.30356009224295e-08	7.56210372588402e-28
LY6H	4	1	1	1	1	0.717654793688155	0.494334083749458	0.660684596751613	0.437363886812916	6.3774892214049e-43	7.62262150435877e-33	4.34277397174403e-56	5.42255552198188e-45
MAPK1	4	1	1	1	1	0.470110233371416	0.463298868965844	0.324466267096592	0.31765490269102	1.41320395561298e-19	4.43309885392284e-27	6.89686885199456e-15	7.88323570347859e-24
MAPRE2	4	1	1	1	1	0.294476135412031	0.300753489789526	0.287797739561967	0.294075093939462	7.75207780397911e-06	4.26823090652045e-08	6.81971080418597e-10	8.67405100068554e-16
MEG3	4	1	1	1	1	0.281358652566942	0.274263216272562	0.335478913875226	0.328383477580846	5.888957102778e-10	6.54041262545329e-16	1.65565763034477e-21	2.27829299146614e-35
MEIS3	4	1	1	1	1	0.366915737844424	0.325586060816322	0.339208356364818	0.297878679336716	2.07216023067581e-12	1.90578872013014e-11	8.76423738579474e-20	1.56148256786084e-20
MMD	4	1	1	1	1	0.488807843599719	0.480792389840429	0.403850482376515	0.395835028617226	7.0776244285259e-18	1.3003667336622e-24	9.65817896952691e-20	1.06518502135883e-30
MRTFB	4	1	1	1	1	0.300255752604809	0.28503433952934	0.291849624863797	0.276628211788328	1.16121364027427e-06	5.06720686196234e-08	2.73462927544278e-10	3.78255768947957e-14
NCAM1	4	1	1	1	1	0.399158611302852	0.337876454237426	0.359062361486724	0.297780204421298	1.07057619200504e-18	1.33577614283847e-14	5.93229946374355e-22	1.04696177971658e-19
NCAM2	4	1	1	1	1	0.40362964769175	0.404419411055855	0.318399099743722	0.319188863107827	1.40036009300205e-11	1.53494815640843e-15	1.49067453329349e-11	8.27276674055408e-18
NCAN	4	1	1	1	1	0.353773125430225	0.321282587319012	0.306492506658913	0.274001968547701	2.67399412505288e-08	3.97786476334478e-10	1.62712003431921e-10	2.44226257005031e-14
NKAIN2	4	1	1	1	1	0.302384732367611	0.279488382134184	0.311964415678785	0.289068065445358	3.72695372383693e-06	3.3855264466661e-07	4.80915769356422e-15	3.23352323932549e-19
NPTX1	4	1	1	1	1	0.381952533267593	0.323492658720064	0.483650899880054	0.425191025332524	1.9067702719262e-13	1.83774185185632e-12	1.62327018180135e-32	1.87648971901419e-37
NPTXR	4	1	1	1	1	0.637438730203379	0.965171139887824	0.319549811299804	0.647282220984248	1.32543466511587e-30	7.23846330605157e-78	2.66649893811134e-14	2.31779829820218e-86
PEA15	4	1	1	1	1	0.625270038578869	0.80683091967078	0.493219722785531	0.674780603877442	4.67368613060254e-48	1.00270041460397e-78	2.18252343483983e-49	1.89164416685352e-110
PEG10	4	1	1	1	1	0.551208076305342	0.314745731505014	0.527887403530944	0.291425058730615	8.45296358391233e-21	1.69788291339149e-09	3.84782348568507e-30	1.92146905840829e-15
PGBD5	4	1	1	1	1	0.356244126096211	0.312585614363347	0.303601647637957	0.259943135905094	7.48605035453289e-11	2.18287783929745e-08	1.3168177919872e-13	9.41911044784575e-12
PGRMC1	4	1	1	1	1	0.513613596865097	0.32821199002322	0.525878250047849	0.340476643205972	1.54403159310522e-22	1.74954552822081e-10	3.51634978348773e-33	6.61741867325925e-21
PLD3	4	1	1	1	1	0.305882777098627	0.316120007772314	0.29226737508063	0.302504605754317	2.06339702060882e-11	1.16930811491124e-16	2.03975648181828e-16	7.6617117079259e-27
PLPPR4	4	1	1	1	1	0.457500632179075	0.421831297716382	0.403882008724664	0.36821267426197	1.13994421670713e-18	2.06619607978621e-17	5.26565050952081e-24	6.99166362272001e-25
PMP2	4	1	1	1	1	0.433851921158619	0.540226284531555	0.329260320175895	0.435634683548831	8.5790688686275e-13	4.28168056303773e-26	6.48722201775284e-11	1.84120243852643e-31
PRKCG	4	1	1	1	1	0.38679180005894	0.439571344965037	0.455423986239907	0.508203531146004	1.69985799745189e-10	2.66862034295067e-18	1.03164321926114e-24	9.03708684607805e-44
PRRT1	4	1	1	1	1	0.275599141938682	0.280151020962854	0.307696297344728	0.3122481763689	0.000402533034636712	5.0497511697408e-07	2.95843550768497e-10	1.47115239627516e-17
PSD3	4	1	1	1	1	0.326147760879887	0.401007455766857	0.277604998987818	0.352464693874788	3.84252036897754e-08	1.76365780392074e-18	3.64679088011972e-09	1.22216183218941e-24
PTMA	4	1	1	1	1	0.360772835842515	0.322835382662073	0.342550799378041	0.304613346197598	1.72272746146944e-13	5.55457113057424e-14	4.38093421216221e-20	1.43799957768139e-23
QDPR	4	1	1	1	1	0.461153491829936	0.27147573516879	0.454235405977793	0.264557649316647	9.57127906166108e-11	1.75361035955948e-05	7.62684135547003e-17	8.05685710292383e-11
RIPOR2	4	1	1	1	1	0.344942987794398	0.345319220029584	0.257279507749381	0.257655739984567	9.09479611425508e-10	6.39996054896516e-12	2.84100549243374e-09	3.67608199209146e-13
RTL8C	4	1	1	1	1	0.255960188962306	0.316403335538994	0.264451066449685	0.324894213026374	1.07772720873769e-06	2.16417371204872e-13	1.11845931106476e-11	4.38888736825485e-24
SCN3B	4	1	1	1	1	0.508937654751281	0.572444299861845	0.47270220064141	0.536208845751974	3.07582901049531e-21	2.68008667726977e-33	4.65366039444666e-27	7.92154112536354e-49
SEPTIN3	4	1	1	1	1	0.40168673670728	0.375705203459112	0.285999986268796	0.260018453020628	3.02825313755444e-19	3.80589957835777e-21	2.36357201676369e-14	1.61648917864095e-16
SLC17A7	4	1	1	1	1	0.552090862641581	0.447263708556797	0.686308046975186	0.581480892890401	1.6237342147957e-45	1.04422082416189e-41	2.16236224654239e-79	2.2060408449112e-92
SLC8A2	4	1	1	1	1	0.394524659190824	0.454382121501608	0.271914552705422	0.331772015016205	2.99297997804249e-13	6.97163067448467e-21	9.24958323449263e-10	1.68214131724985e-20
STUM	4	1	1	1	1	0.47266365366792	0.375563581230722	0.464200711511181	0.367100639073983	1.49692504098629e-17	8.13149391194586e-18	1.00312777672051e-32	5.68150250830043e-36
SYN2	4	1	1	1	1	0.327286034561939	0.318686416424344	0.666894328535856	0.658294710398261	8.42878410819547e-13	1.05124710065754e-16	5.01898555079987e-59	1.93119557984788e-83
SYP	4	1	1	1	1	0.381080697959444	0.42252984099671	0.387065577643742	0.428514720681008	1.64365505308315e-20	1.13213544466674e-34	6.86646190864227e-31	5.60681603581041e-58
SYT5	4	1	1	1	1	0.293190811792615	0.250466559079446	0.293034730067907	0.250310477354739	0.000265187718238989	3.2688386198336e-05	6.89149696700843e-09	2.75501280359832e-12
TIMP2	4	1	1	1	1	0.492651941762355	0.517956857749353	0.365994160854891	0.391299076841888	1.04453768616229e-18	1.92110351204134e-30	7.79778903295932e-16	5.07981701356593e-31
TMEM132A	4	1	1	1	1	0.283261963400834	0.309733225219588	0.256826937846918	0.283298199665672	6.98438294005375e-05	4.119248733308e-08	1.98429280095963e-07	1.04532517139003e-13
TMEM59L	4	1	1	1	1	0.353800208599933	0.431030293597677	0.346744118094336	0.423974203092081	3.63821729966069e-15	9.13338252131944e-29	2.28237919464731e-21	1.73198853189518e-45
ADGRG1	3	1	1	0	1	0.389473983309113	0.500440150175029	0	0.318822304130877	1.29677340095507e-07	1.87288020589926e-22	0	2.44972222133439e-16
AK5	3	1	1	0	1	0.385025279430598	0.440064233860371	0	0.25401340992811	1.18261772150908e-09	7.27566060312064e-18	0	2.97823671310479e-10
AQP4	3	1	1	1	0	0.847199411711069	0.718310248488195	0.311232880410259	0	1.81642572275683e-42	4.06858672431727e-42	8.01710714373828e-12	0
ARPC5	3	1	1	1	0	0.379189350308557	0.269904123116118	0.257473385103175	0	4.04872221318795e-12	1.08703559888121e-07	1.39840246465751e-08	0
ATP1B2	3	1	1	0	1	0.363034522004472	0.438221900241513	0	0.250313842075307	5.05279214729318e-09	3.70094900424325e-18	0	3.94316419235319e-09
B2M	3	1	1	0	1	0.490892375694391	0.781559165188152	0	0.284108816522848	1.63498623921301e-19	1.43793406788921e-54	0	1.56102832987419e-18
C1orf115	3	1	1	0	1	0.263219291570869	0.375402056919467	0	0.262290297234941	0.0173085168085177	1.54570649793436e-12	0	3.11490708577391e-11
C1QA	3	1	1	0	1	0.335615515883821	0.82273580178109	0	0.70129718492187	3.48864656327946e-09	9.89597337830166e-48	0	4.62941124059899e-66
C1QC	3	1	1	0	1	0.322412541762272	0.733069528916453	0	0.612830312500867	1.18122272863319e-05	9.87847485762988e-36	0	6.44155719349026e-48
CACNA2D1	3	1	1	0	1	0.284923795878541	0.314477411815042	0	0.26844552421885	6.83658367663004e-06	5.77022197389174e-11	0	2.72516856307226e-15
CAMK2D	3	0	1	1	1	0	0.259456680732488	0.325600972577582	0.368771286435621	0	3.11690617423028e-05	1.82763695110417e-12	1.13170980812596e-23
CAPZB	3	1	1	1	0	0.384075701498865	0.308422807861084	0.261176953071784	0	1.52039532032347e-13	5.66498778657698e-08	1.79419397667271e-09	0
CD24	3	1	0	1	1	0.335248879766057	0	0.51949100610843	0.31856802336393	4.82772486968222e-08	0	2.68347846361808e-48	1.00684699977197e-28
CD63	3	1	1	0	1	0.301306854549947	0.562388214230293	0	0.256046718180846	9.26816427852044e-06	7.79903493443213e-31	0	3.65586285345953e-13
CELF5	3	1	1	1	0	0.411288686382864	0.373455898504431	0.285066715085798	0	6.1785217191965e-15	1.69146377053459e-12	3.38319524108313e-11	0
CLDN11	3	1	0	1	1	0.320819630651657	0	0.507044900926085	0.314090087830761	5.8754217839625e-07	0	6.54781559857553e-46	9.58480050955434e-27
CNIH2	3	1	1	1	0	0.363995025425238	0.313446209387912	0.26095631252857	0	8.36334824297001e-09	9.35766778195986e-09	1.35199952905294e-06	0
CTSB	3	1	1	0	1	0.300798338609342	0.587045960849497	0	0.402942419326817	1.22353104036175e-07	3.75122119225179e-43	0	5.28846246683514e-38
DDN	3	1	1	0	1	0.515835672372392	0.642033363892712	0	0.325728023908889	1.4396855434485e-23	2.95835042240514e-39	0	4.32676918445914e-20
DNAJB2	3	1	1	0	1	0.307732096358056	0.429362537603347	0	0.292075627699266	3.44970351607703e-06	1.46534600047292e-20	0	1.46511300375912e-16
DPYSL3	3	1	1	1	0	0.513750513770441	0.418865783070265	0.322552278777437	0	2.37633730144281e-21	9.78237591242355e-18	1.0818661143881e-12	0
ELK1	3	1	1	0	1	0.292413529708918	0.334414979116761	0	0.287618811341527	0.00314605467161392	2.83472575574242e-09	0	4.2807517438464e-13
FABP3	3	0	1	1	1	0	0.264794633484423	0.364370967716043	0.475851879460032	0	3.50327989300703e-06	5.41364966933673e-18	1.7030701747893e-44
FADS2	3	1	1	1	0	0.370056866745285	0.322408604250583	0.268949776059518	0	2.36032480428966e-11	4.95343799271142e-10	8.58273499442635e-10	0
FTL	3	1	1	0	1	0.344035463050875	0.966439788076414	0	0.616916135963673	7.97921451029673e-29	5.6101522661516e-94	0	1.12940162677793e-135
FXYD6	3	1	0	1	1	0.264395729706477	0	0.715097197651539	0.566745942920014	4.67163612138553e-09	0	2.98907849261177e-67	2.32443095418504e-67
GDA	3	1	1	1	0	0.499479833169846	0.257401911004396	0.450820688778249	0	2.51061584709189e-16	4.65042077031594e-05	6.92282126938433e-21	0
GPM6A	3	1	1	1	0	0.39080676139528	0.321777467333612	0.289980395688257	0	5.0445932571688e-36	3.28473224133563e-32	4.86272148826505e-33	0
HIPK2	3	1	1	1	0	0.528889574986125	0.335219027636223	0.270603073255486	0	1.49706847627097e-19	8.38636759485519e-10	2.42642709482784e-07	0
HLA-A	3	1	1	0	1	0.356477880187972	0.573323257853707	0	0.270546752709293	1.07926797772577e-06	2.46386894932868e-28	0	8.3125366104529e-11
HLA-B	3	1	1	0	1	0.322043610751312	0.785144435490858	0	0.38013105580244	0.000704932452697579	5.20985842737295e-44	0	7.40201349505131e-22
HLA-DRA	3	1	1	1	0	0.469391196849335	0.421447812614774	0.286708954749396	0	4.64588918786629e-17	8.72451957407193e-19	2.74284404295167e-09	0
HSP90AB1	3	0	1	1	1	0	0.352189537832095	0.348989100206515	0.52994199435711	0	1.26791365990183e-40	1.08433076422609e-36	1.86717922919785e-104
HSPB8	3	0	1	1	1	0	0.264715103243007	0.252939124007908	0.343771539102825	0	2.59255298434807e-05	1.86805937061268e-07	9.72387259672391e-22
ID4	3	1	1	1	0	0.552307679667398	0.475219423016791	0.252464718192284	0	1.94345322704662e-25	5.36941876658102e-25	4.11284592156091e-07	0
ITPKB	3	1	1	1	0	0.448765951076537	0.250321645696442	0.319509260621588	0	7.44238171158867e-12	1.38993920498448e-05	2.67704964026868e-08	0
KIF21B	3	1	1	1	0	0.33105969934796	0.286086169058219	0.264871036008065	0	2.89739115275466e-09	3.01759682647226e-07	7.75374254289849e-10	0
LAPTM5	3	1	1	0	1	0.294866096699388	0.44805981455581	0	0.283636121449934	2.82028227915964e-08	2.01774362606828e-21	0	8.96689305712416e-16
MARCKSL1	3	1	1	1	0	0.433865053911047	0.306034635524755	0.308508975162719	0	8.02857047131121e-10	4.49980803166642e-08	1.43921616047109e-06	0
MAST3	3	1	1	0	1	0.287995994915511	0.431396123267963	0	0.328206483390812	1.24326665166468e-06	8.2581564773718e-25	0	8.02740561786853e-25
MBP	3	1	1	1	0	1.11692207262594	0.392025742343346	0.859578655061217	0	3.5406930983051e-74	9.16475096305999e-22	1.10687983225394e-98	0
MTRNR2L1	3	1	1	1	0	3.28934864523721	0.408314642341335	2.70532784834013	0	1.28161040978957e-79	6.63409898562748e-18	2.72605758355301e-115	0
NECAB2	3	1	1	0	1	0.251059202532347	0.610068652938722	0	0.454922221370844	0.000602064435073265	2.99139436498229e-34	0	3.52289820833322e-36
NPY	3	1	1	1	0	0.716345396857263	0.261288889861797	0.633387985019939	0	4.93539663130062e-24	3.40253739349166e-10	3.23007863942071e-29	0
NSG2	3	0	1	1	1	0	0.316855470003703	0.317789058445344	0.489749377174209	0	5.06351069721827e-12	1.73999207604491e-12	6.04446748864897e-45
NSMF	3	1	1	1	0	0.565605412113607	0.423166389155186	0.25296439919147	0	5.43862055673286e-26	3.13106823788104e-20	7.9226528839561e-06	0
NUMBL	3	0	1	1	1	0	0.27090400321382	0.253621601427335	0.302613466609317	0	1.61236276996899e-07	2.88890270640169e-09	1.70987164495273e-20
NUPR1	3	1	1	0	1	0.276965817260238	0.841489043106	0	0.763580236917082	3.35536122865361e-06	3.52930887362032e-52	0	8.31477322427641e-80
PGM2L1	3	1	0	1	1	0.435153639251799	0	0.609186260453485	0.301263993101942	8.93945502922785e-16	0	5.8066655187173e-43	1.35115791346452e-16
PIANP	3	1	1	0	1	0.259689699166023	0.284835562351047	0	0.265497080156526	0.00215027034201942	4.73638073853732e-06	0	2.10816204338698e-11
PLP1	3	1	0	1	1	0.711605602222051	0	1.28996695430148	0.794175362327895	1.02295360520359e-36	0	1.18090372044557e-100	3.47602975509796e-72
POLR2L	3	1	1	0	1	0.257581707024737	0.492433539647413	0	0.266279500211859	0.00106155398638825	9.9246110480831e-26	0	2.43846167887923e-13
PPFIA2	3	0	1	1	1	0	0.287952192987821	0.258809982357692	0.39843256162204	0	2.27361061615724e-05	3.59889679886615e-06	1.89152595958819e-24
PPP1R14A	3	1	0	1	1	0.257373134701528	0	0.336042498754694	0.268012406963561	0.0550039053624282	0	3.66399003059407e-13	5.23343437953161e-16
PRMT2	3	0	1	1	1	0	0.276138693440338	0.254594068531262	0.282358563138642	0	2.0575172789111e-05	1.11941273614853e-08	3.1156955537155e-13
QKI	3	1	1	1	0	0.60401133416371	0.386679749779677	0.291647291192104	0	1.40837405256268e-25	1.24309683947198e-13	1.88072580876346e-09	0
RAB11FIP4	3	1	0	1	1	0.252367600135807	0	0.309543780225213	0.281083791362591	0.00029988970402816	0	8.39650630680946e-13	6.9540408885396e-13
RAB3C	3	1	0	1	1	0.289616740813244	0	0.534223221980029	0.307820474817166	2.5249533330777e-05	0	1.35228831312504e-33	5.75248296068396e-18
RHBDD2	3	1	1	0	1	0.323799570255034	0.363605438387123	0	0.273139994574053	8.96058295555996e-11	5.2337486310339e-17	0	2.39616378357922e-17
RPS19	3	1	1	0	1	0.401305803571986	0.634155129261565	0	0.266613058398268	6.37295290889859e-16	2.68577805622265e-51	0	2.69117565463771e-19
RPS2	3	1	1	0	1	0.287995994915511	0.511468907938614	0	0.297767058942241	3.55164859373184e-07	4.80630875544626e-33	0	4.75690542004073e-23
S100A10	3	1	1	0	1	0.325643143621362	0.450562420664776	0	0.373642220026091	2.31524825976968e-12	1.97078357359846e-24	0	1.62874085704298e-32
SCD	3	1	1	1	0	0.78255364621713	0.317101895995565	0.330981831014777	0	5.71671287382917e-38	1.06739936292824e-06	7.79792560216019e-13	0
SCD5	3	1	1	1	0	0.489807438697979	0.388544359884269	0.326290043724529	0	9.40861283359143e-21	5.43952646264462e-19	2.69329113829776e-14	0
SLC26A4-AS1	3	1	1	1	0	0.363021130597068	0.294502144641782	0.302949544582569	0	7.40556963936051e-09	2.02506012902252e-08	1.25858740749617e-10	0
SNCA	3	1	0	1	1	0.429513581168829	0	0.677048228914283	0.46417123565038	7.86268814299142e-17	0	3.23768697299735e-53	8.15139014416872e-42
SREBF2	3	0	1	1	1	0	0.301783234156283	0.278797670272149	0.388842844393519	0	7.3254051087323e-09	2.52159589592222e-08	1.2057412387039e-27
STMN3	3	1	0	1	1	0.26568624015931	0	0.363282010113698	0.325703058073445	4.68403882153817e-08	0	1.28960854340941e-22	6.18459278365898e-29
SUB1	3	1	1	0	1	0.266554048665784	0.392022973137606	0	0.350277071668767	4.35789014277405e-05	1.10111479620247e-17	0	1.21274900182684e-24
SYT17	3	0	1	1	1	0	0.258043468462384	0.266299134963748	0.306244048127999	0	7.61956842416142e-07	2.07488632831117e-12	1.10134499473227e-23
TF	3	1	0	1	1	0.445667805141348	0	0.587527072460792	0.2822975000299	3.06482208303358e-13	0	7.91571670427385e-42	4.98982381868796e-17
THY1	3	0	1	1	1	0	0.265153587353133	0.316475808361068	0.452196280455817	0	2.11225975697273e-17	1.15822813389467e-22	1.22092820380993e-70
TMSB4X	3	1	1	0	1	0.330857949344012	0.654840810182638	0	0.425787350900577	1.44799735673112e-29	1.61494475737063e-80	0	1.23922399336348e-85
TPPP	3	1	1	1	0	0.324091162895404	0.276672688521426	0.250820479147623	0	4.84774000568745e-10	8.87206870011485e-09	6.68125337236186e-09	0
TUBA1A	3	0	1	1	1	0	0.379336015806135	0.577810847473333	0.728027397282068	0	2.95328723065113e-34	8.49742601800825e-53	6.65217109592439e-112
TUBB2A	3	1	0	1	1	0.265627016580412	0	0.630002378953762	0.346708398776134	8.39298933707329e-09	0	2.39504695902812e-60	7.44723910032294e-34
XPO1	3	1	1	0	1	0.250975868620258	0.332581312309167	0	0.26919314942495	0.00160706232264975	2.01445206011073e-11	0	7.02208382414872e-14
ABCA2	2	1	0	1	0	0.352617679594234	0	0.384231758865869	0	6.74063830064621e-06	0	1.99315914125233e-12	0
ABHD2	2	1	1	0	0	0.265102175049659	0.260715035245243	0	0	0.00216528769544395	4.20395295792338e-05	0	0
AC107398.3	2	1	1	0	0	0.300760362169337	0.36315654937986	0	0	5.79684448288781e-08	2.76514076082361e-14	0	0
ACTB	2	1	1	0	0	0.274520046530119	0.291625795022895	0	0	1.49945563396841e-27	1.09170343216329e-34	0	0
ADD3	2	1	1	0	0	0.390511558441106	0.436448653628131	0	0	3.86886020242056e-10	1.95517396177636e-19	0	0
AGAP2	2	1	1	0	0	0.419241413163863	0.349437276638502	0	0	5.20596652922085e-12	6.47087345190263e-11	0	0
AHCYL1	2	1	1	0	0	0.258001639047319	0.50016062798229	0	0	0.0319446934524616	1.83183167911264e-25	0	0
AHNAK2	2	1	0	1	0	0.269756072899792	0	0.264742863935392	0	1.15117662294969e-05	0	2.36353889228868e-11	0
AIF1	2	0	1	0	1	0	0.433994664666565	0	0.446704002435882	0	1.14265928932916e-21	0	4.58908259053587e-49
AK4	2	1	1	0	0	0.339579183680673	0.273203243894991	0	0	3.45102357090618e-11	8.50632124020245e-09	0	0
AL627171.2	2	1	1	0	0	0.337449243066462	0.353510602026138	0	0	8.99264956601571e-08	8.46339354750869e-09	0	0
ALDH6A1	2	1	1	0	0	0.313757988576714	0.275905507324116	0	0	1.81967812078821e-06	3.35788077398467e-08	0	0
AMER2	2	1	0	1	0	0.359693730656867	0	0.270672766273976	0	2.65770330850557e-07	0	1.50116305904632e-06	0
ANXA5	2	1	1	0	0	0.295083468315134	0.300508694585258	0	0	1.95278026114328e-05	1.28629447887555e-10	0	0
AP2M1	2	0	0	1	1	0	0	0.269107154278889	0.258488354171638	0	0	1.96923294144256e-11	1.69662073412235e-19
APLN	2	1	0	1	0	0.279535901012748	0	0.260686568109769	0	5.04433707460768e-11	0	2.06748656190572e-20	0
APLNR	2	0	1	0	1	0	0.271167394552749	0	0.364984935502022	0	5.49862114754955e-10	0	6.44582445398426e-53
APOD	2	1	1	0	0	0.504897885306244	0.659858836059772	0	0	1.75314371294088e-19	3.61221539080585e-36	0	0
APOE	2	1	1	0	0	1.03911714934729	0.816404773605597	0	0	1.66594398967298e-66	1.24704225054683e-71	0	0
ARF1	2	1	0	1	0	0.369675364165515	0	0.36482896301324	0	3.49299886827327e-11	0	8.08822464618069e-17	0
ARF3	2	1	1	0	0	0.334714101744314	0.277451287083418	0	0	1.34927751643677e-12	1.73455660168028e-10	0	0
ARFGEF3	2	1	1	0	0	0.284923795878541	0.258290198230731	0	0	1.9669025738388e-06	1.21250979813308e-06	0	0
ARHGDIA	2	1	1	0	0	0.373488307356612	0.356787248477235	0	0	7.4134987385575e-09	2.13521299460397e-14	0	0
ARHGDIG	2	1	1	0	0	0.263713651688507	0.26711925512783	0	0	0.000117677412393354	0.000548194528523363	0	0
ARL6IP1	2	1	0	1	0	0.398083881020435	0	0.286870903897718	0	9.37399219011973e-19	0	8.07500569888878e-13	0
ARL8A	2	1	0	1	0	0.348038035882378	0	0.290466273282237	0	2.46420001672524e-10	0	1.35286530575013e-11	0
ARPC4	2	1	1	0	0	0.39671743985891	0.355900137811387	0	0	4.03795867508691e-11	5.83532841353957e-13	0	0
ASPH	2	1	0	1	0	0.253079729809283	0	0.261518598455148	0	0.00027559286090389	0	1.0381424865958e-08	0
ATP1A2	2	1	1	0	0	0.676952995146602	0.619366122483103	0	0	5.43195484423205e-34	6.49529827930363e-33	0	0
ATP1A3	2	0	0	1	1	0	0	0.310683535182306	0.299756743984869	0	0	1.43943253310059e-15	3.85876241232808e-19
ATP2B1	2	1	1	0	0	0.257267450661481	0.266631372954269	0	0	0.000245142833564276	9.52757842895167e-06	0	0
ATP2C1	2	1	0	1	0	0.273260296261758	0	0.255509819511009	0	8.46431519072897e-05	0	2.4030168894944e-08	0
ATP5IF1	2	0	0	1	1	0	0	0.272260810385492	0.319802348989828	0	0	5.26555266238056e-09	1.43136517513086e-18
ATP6AP1	2	0	0	1	1	0	0	0.292671125085818	0.290424587551551	0	0	4.2912280315223e-09	2.94257747056893e-17
ATP6V0C	2	0	0	1	1	0	0	0.284578243168664	0.387034995273065	0	0	2.78722916817108e-23	2.37706946147244e-62
ATP6V1B2	2	0	0	1	1	0	0	0.287653699230425	0.257184374731307	0	0	2.31194822010224e-11	8.32045270306006e-13
ATP6V1G2	2	0	0	1	1	0	0	0.3635917342475	0.272773173635941	0	0	5.9091190092926e-14	1.69662284673043e-13
ATP6V1H	2	0	1	0	1	0	0.366295913462918	0	0.322718129904992	0	2.00570194494386e-12	0	2.8739224471564e-16
ATP8A1	2	1	0	1	0	0.352707391842259	0	0.418493300189237	0	2.86217001207667e-09	0	1.32718863879423e-20	0
B3GALNT1	2	1	0	1	0	0.265664292285509	0	0.275798555516619	0	7.58375278911061e-05	0	6.41291202267467e-11	0
B3GAT1	2	1	1	0	0	0.394356010906421	0.290748280289822	0	0	1.44259904041537e-13	4.67229620805938e-07	0	0
BAIAP2	2	1	1	0	0	0.333681327764852	0.411770725217759	0	0	1.52282506193293e-06	1.33516296762395e-14	0	0
BCAN	2	1	1	0	0	0.332644416737953	0.313691435150107	0	0	4.2610163737426e-06	6.0119380427663e-09	0	0
BEX4	2	1	0	1	0	0.286699995279797	0	0.308219017853655	0	3.69792898210746e-07	0	1.50026796749081e-12	0
BSG	2	1	1	0	0	0.352856037310703	0.556800969464621	0	0	2.49743918817212e-13	1.46082921666427e-41	0	0
BST2	2	0	1	0	1	0	0.360056845465962	0	0.297251523467932	0	2.11496725744157e-14	0	5.26209515559057e-19
BTBD2	2	1	1	0	0	0.254252246617149	0.268936798300071	0	0	0.00144198736233387	2.19245453834901e-05	0	0
C1QTNF4	2	0	1	0	1	0	0.365614726082652	0	0.289907549212173	0	1.7796358902144e-12	0	4.05772123851571e-13
C1R	2	0	1	0	1	0	0.331862131816994	0	0.401108763850715	0	4.00003943520278e-12	0	3.35001552364442e-41
C7orf50	2	1	1	0	0	0.285973749534743	0.3828134377955	0	0	5.97912342277397e-07	2.97598860483331e-14	0	0
CACNA1E	2	1	1	0	0	0.29726963170084	0.316606045090687	0	0	1.37442241854372e-06	1.38327588964146e-09	0	0
CACNG3	2	0	1	0	1	0	0.367070648302412	0	0.302465400298119	0	2.16244542037967e-13	0	8.46729936177026e-16
CACYBP	2	0	1	0	1	0	0.279437862540149	0	0.346076019454378	0	7.6426421496745e-06	0	3.97631126129585e-20
CALB1	2	0	1	0	1	0	0.352270139722806	0	0.336189391194352	0	4.29388453732089e-13	0	7.03321174640137e-25
CALM3	2	0	0	1	1	0	0	0.357000651713171	0.485934666471164	0	0	6.49566865178252e-45	6.52171544521548e-100
CALR	2	0	1	0	1	0	0.615566790704549	0	0.5229235211355	0	1.67744271134432e-34	0	1.03576740122475e-45
CAMK2N1	2	0	1	0	1	0	0.348046543751093	0	0.395095274427349	0	1.09385106088283e-24	0	1.78616746142851e-53
CAMKV	2	1	0	1	0	0.25538489498608	0	0.302949544582569	0	7.27968608729233e-05	0	1.70881005786201e-12	0
CANX	2	1	1	0	0	0.325164434758386	0.355497026822014	0	0	2.45469425220597e-08	1.01577883267035e-16	0	0
CAP2	2	0	1	0	1	0	0.270756966995861	0	0.31347247929147	0	4.50167197751254e-07	0	4.69045150311404e-18
CARNS1	2	1	0	1	0	0.260306002786165	0	0.366667889336251	0	4.90575044010291e-05	0	2.68070104530254e-27	0
CBX6	2	1	1	0	0	0.255276597982764	0.31345070161972	0	0	0.00146647881887925	3.6379756357612e-10	0	0
CCDC92	2	1	1	0	0	0.433553309699674	0.283230698400234	0	0	4.82306034110931e-18	1.06588903317569e-06	0	0
CCT5	2	1	1	0	0	0.265759853468629	0.273725454902805	0	0	0.0025734403506488	9.32950660821856e-06	0	0
CD81	2	0	1	0	1	0	0.403940044602722	0	0.263140093134482	0	1.03100005702057e-23	0	1.41437356629569e-17
CD99	2	1	1	0	0	0.339867825622351	0.480883162772003	0	0	7.51084632112755e-09	1.00074048955946e-20	0	0
CDH13	2	1	0	1	0	0.254790822098055	0	0.307659540206488	0	0.00130667432271079	0	1.98852796887788e-13	0
CDH2	2	1	1	0	0	0.251075003316066	0.322184011324316	0	0	1.73417135230572e-05	2.72875835991294e-10	0	0
CDH8	2	0	1	0	1	0	0.277611542067246	0	0.291465586400888	0	1.93792522856139e-07	0	1.91648504275288e-18
CDK5R2	2	1	1	0	0	0.373869622899841	0.282947535369669	0	0	5.28289958637992e-11	7.17725765320914e-06	0	0
CELF4	2	1	0	1	0	0.363794986005038	0	0.279303850691609	0	1.16645744736753e-11	0	1.32559666668969e-10	0
CERCAM	2	1	0	1	0	0.392547121617779	0	0.41453723617756	0	1.50741123050214e-13	0	1.95658670991634e-27	0
CERS1	2	1	1	0	0	0.286565890989257	0.382952901764079	0	0	2.92416432293608e-07	2.68481640142412e-15	0	0
CHD3	2	1	0	1	0	0.47822625899519	0	0.344419977469866	0	5.9543043807348e-17	0	1.09732785013122e-13	0
CHI3L1	2	0	1	0	1	0	1.34185327860139	0	1.58581549903506	0	1.06027024577474e-79	0	2.32630954535599e-156
CHI3L2	2	0	1	0	1	0	0.349437276638502	0	0.361386085803807	0	5.73004970744167e-18	0	8.11631984586553e-50
CHORDC1	2	0	1	0	1	0	0.300192463677424	0	0.251554910562951	0	9.01569188131538e-10	0	3.32351989645523e-13
CHP1	2	0	1	0	1	0	0.288880037996514	0	0.258743982800395	0	1.48381160132e-07	0	5.71910749270859e-13
CLDN10	2	1	1	0	0	0.299518756152292	0.269504938150001	0	0	5.74769191519598e-05	3.18936999104829e-07	0	0
CLIP3	2	1	1	0	0	0.324363639086386	0.315005080217018	0	0	9.43069521330447e-09	5.69012792724995e-11	0	0
CLSTN1	2	0	0	1	1	0	0	0.283482995259642	0.40709492247238	0	0	1.12209056306272e-16	5.31908910231304e-51
CLSTN2	2	1	0	1	0	0.366575644537287	0	0.577392317949037	0	1.20732872554044e-07	0	3.15336910148319e-36	0
CNDP1	2	1	0	1	0	0.299561427916818	0	0.353575254349841	0	1.88462643236295e-05	0	2.26183482327863e-21	0
CNP	2	1	0	1	0	0.505298767251882	0	0.528620566589457	0	7.63336208674214e-18	0	9.59735590457527e-30	0
CNTN1	2	1	0	1	0	0.476406739310829	0	0.422579398904307	0	2.22054545057229e-22	0	4.90406279805187e-27	0
CPE	2	1	1	0	0	0.529976349373303	0.278713402469021	0	0	9.32824189460378e-43	3.33653719122074e-16	0	0
CPNE7	2	1	0	1	0	0.320296939703832	0	0.319638723898777	0	3.94479262984657e-08	0	8.9254143319714e-16	0
CRELD1	2	0	1	0	1	0	0.285358419953979	0	0.373830666566193	0	1.10977464627694e-06	0	3.12063486106072e-25
CSF1R	2	1	1	0	0	0.309313416576265	0.298744162322984	0	0	1.38616529838504e-09	3.1722120979539e-11	0	0
CSPG5	2	1	0	1	0	0.419691321450461	0	0.279596122078576	0	5.84161793304097e-14	0	8.45934988519996e-10	0
CTNND2	2	1	1	0	0	0.364214606150644	0.254203429798605	0	0	6.91737801356666e-11	3.99112429482075e-05	0	0
CTSD	2	1	1	0	0	0.364797208664877	0.324866015907997	0	0	4.34175138211964e-13	2.62509242397855e-14	0	0
CYB5R3	2	1	1	0	0	0.365602647791166	0.347976355998827	0	0	6.39597880650976e-09	2.50875235237326e-11	0	0
CYSTM1	2	1	1	0	0	0.312440757206194	0.304180685050381	0	0	4.53176629885236e-08	5.10303320750633e-10	0	0
DAAM2	2	1	0	1	0	0.40059971863836	0	0.317310220416456	0	8.23233919794493e-16	0	1.0261443403726e-16	0
DBI	2	1	1	0	0	0.574245744372359	0.709617520211513	0	0	1.55738716770213e-20	2.48821564443854e-45	0	0
DCTN5	2	1	1	0	0	0.258382789611555	0.277472634762393	0	0	0.0168971954498966	3.56403079295938e-07	0	0
DDAH1	2	1	1	0	0	0.525259866335975	0.370735274317436	0	0	2.20644072637647e-24	7.5954377796704e-13	0	0
DDIT4	2	1	1	0	0	0.302384732367611	0.399659763802867	0	0	1.07926840748374e-06	1.70411379091763e-18	0	0
DDR1	2	1	1	0	0	0.339867825622351	0.285533474659022	0	0	2.64744907345391e-07	2.90380279789486e-08	0	0
DDRGK1	2	0	1	0	1	0	0.307217657851609	0	0.290703818165632	0	9.65161373312004e-09	0	1.05136511091102e-16
DKK3	2	1	1	0	0	0.432511153890778	0.304466447990438	0	0	1.63242713090035e-34	8.3215884720912e-21	0	0
DLG2	2	1	1	0	0	0.30930622892465	0.302356879929824	0	0	1.03829825304595e-06	9.6673726149214e-09	0	0
DLG4	2	1	1	0	0	0.328507863832412	0.28085960133771	0	0	4.3399977624657e-08	4.44036045449739e-07	0	0
DNAJA1	2	0	1	0	1	0	0.253319854675367	0	0.461509253088643	0	6.26102606380057e-08	0	1.33377807347634e-42
DNAJA4	2	0	1	0	1	0	0.431675374875474	0	0.460615166517272	0	8.67863840756351e-19	0	1.02100579291065e-37
DNAJB1	2	0	1	0	1	0	0.359317385238209	0	0.405756993691089	0	1.22389195738575e-12	0	1.56490573584921e-29
DNAJC12	2	0	1	0	1	0	0.26480471194524	0	0.295861669178877	0	1.06343284033345e-06	0	1.39726292019522e-19
DNAJC6	2	1	0	1	0	0.328244985794358	0	0.399921314356554	0	4.80255601807779e-08	0	2.01131481797325e-19	0
DOC2A	2	0	1	0	1	0	0.30827228777429	0	0.270025355120242	0	3.19593515757142e-09	0	1.98810314488542e-13
DPYSL2	2	0	0	1	1	0	0	0.34072283778711	0.353999429286081	0	0	3.50289050964007e-31	4.82206437307842e-43
DTNA	2	0	1	0	1	0	0.619401324359096	0	0.252662614904974	0	5.66535785983379e-34	0	7.98257373416999e-10
EDNRB	2	1	0	1	0	0.474868726226234	0	0.465010110430521	0	5.8201954251202e-19	0	4.21109043507493e-34	0
EEF1B2	2	1	1	0	0	0.278164455049741	0.299136538163703	0	0	9.65101891854517e-05	3.42350920597178e-06	0	0
EEF1D	2	1	1	0	0	0.266194799403799	0.260788663872086	0	0	0.00521042197782672	1.79027263559295e-05	0	0
EEF1G	2	1	1	0	0	0.294350986797888	0.287445600610534	0	0	6.70747985352145e-06	8.63254736367931e-08	0	0
EFHD1	2	1	1	0	0	0.324928578935319	0.25108449813808	0	0	1.37602259821325e-06	2.13587290011327e-06	0	0
EIF5A	2	1	1	0	0	0.351417821353007	0.32044973976525	0	0	2.50999751730951e-07	4.70153750242778e-09	0	0
ELAVL3	2	1	1	0	0	0.256900209651333	0.331499575951835	0	0	0.0150768651297485	2.80716642121602e-10	0	0
ENC1	2	0	1	0	1	0	0.355334252137977	0	0.498386507416331	0	7.43609097858636e-25	0	7.69337481764433e-75
ENPP2	2	1	0	1	0	0.2619321965945	0	0.405210730695507	0	0.000245176870777673	0	7.19231911844278e-34	0
EPHX1	2	1	1	0	0	0.360070532939871	0.410621965677642	0	0	2.34948770032189e-09	2.16671159060928e-17	0	0
ERBIN	2	1	0	1	0	0.410048110666591	0	0.258822404640783	0	5.03018476892613e-11	0	1.69074145565e-05	0
ERMN	2	1	0	1	0	0.314358553125424	0	0.375058124580686	0	8.29893509280087e-09	0	2.55307721106211e-28	0
FABP5	2	0	0	1	1	0	0	0.301896358597911	0.25511287306293	0	0	1.71676503270783e-11	2.20284676364911e-09
FAIM2	2	1	1	0	0	0.355676276938635	0.345261905228021	0	0	1.94608502757388e-17	1.48657605328647e-22	0	0
FAM107A	2	1	1	0	0	0.766749841367727	0.808384154044417	0	0	1.84590870242729e-51	1.91607781499768e-71	0	0
FAM131A	2	1	1	0	0	0.364448034458319	0.347284423277401	0	0	1.28480052092739e-11	8.2886992791642e-12	0	0
FAM171B	2	1	1	0	0	0.608218441055825	0.323326132634816	0	0	1.47900965672987e-28	3.36004622837376e-10	0	0
FAM3C	2	0	0	1	1	0	0	0.300332084640351	0.290550254529199	0	0	5.31769551042785e-12	1.50906185660958e-13
FASN	2	1	0	1	0	0.335907424406254	0	0.375874784487242	0	4.48195256903848e-09	0	1.01147948941669e-18	0
FAU	2	1	1	0	0	0.266847656948088	0.327007875430665	0	0	2.85916379955228e-07	3.23100516634047e-16	0	0
FBXL16	2	1	1	0	0	0.355759192958986	0.384512814742349	0	0	7.43103553379391e-15	9.29693143789831e-23	0	0
FBXO2	2	1	1	0	0	0.42806897074757	0.324896167722384	0	0	3.09299193599608e-14	3.38576501534929e-09	0	0
FCER1G	2	0	1	0	1	0	0.357852473563787	0	0.384216731340076	0	1.87309960675658e-13	0	3.11437506010803e-33
FCGBP	2	0	1	0	1	0	0.387773425382049	0	0.45651042787253	0	6.74440373783519e-17	0	4.88331087701957e-59
FCGR3A	2	0	1	0	1	0	0.317961144536484	0	0.361085571170239	0	7.60209941778056e-11	0	2.64195222300819e-33
FDFT1	2	1	0	1	0	0.258554469747359	0	0.283184313744949	0	0.00846635485943849	0	7.71823326174952e-08	0
FGFR3	2	1	1	0	0	0.481367387896051	0.260824618281898	0	0	2.26057631963248e-14	1.21905061135478e-06	0	0
FKBP1A	2	1	1	0	0	0.392630105726369	0.524819180321916	0	0	9.81264228543525e-11	8.64946877485167e-27	0	0
FLNA	2	1	1	0	0	0.27382441330536	0.284196754770101	0	0	0.000101726898510561	8.25790518493559e-07	0	0
FRRS1L	2	1	1	0	0	0.267256350584863	0.271236529331027	0	0	0.000561024448068122	0.000223653944758878	0	0
FSCN1	2	0	1	0	1	0	0.296584200304144	0	0.272326771499184	0	1.44904733563089e-06	0	8.19997564709014e-12
FXYD1	2	1	1	0	0	0.292580291337454	0.405718112537091	0	0	0.000140465145215557	1.18313808124737e-15	0	0
GALNT17	2	1	0	1	0	0.353223616803907	0	0.332729062594769	0	1.02020421252261e-06	0	3.5159755180988e-11	0
GAMT	2	1	1	0	0	0.261555222186597	0.267372323584198	0	0	0.0012292115418493	3.1125293655192e-06	0	0
GAREM2	2	1	0	1	0	0.290146995959966	0	0.284850466477218	0	1.44754011617917e-09	0	1.3311038822874e-19	0
GATM	2	1	1	0	0	0.324591382830111	0.308827844559264	0	0	8.74176468151478e-06	1.43644835221317e-08	0	0
GIT1	2	1	1	0	0	0.398910366256135	0.344474487296373	0	0	7.99107802843803e-11	7.80214558733023e-11	0	0
GJA1	2	1	1	0	0	1.0120404160801	0.95579911634327	0	0	5.64595681415566e-49	1.15784266974041e-58	0	0
GLS	2	0	0	1	1	0	0	0.29591873451766	0.2793287071668	0	0	3.08165325684738e-09	1.98472506659021e-13
GLUD1	2	1	1	0	0	0.556432940593444	0.27122024859322	0	0	3.43609573513407e-22	2.87240899084502e-05	0	0
GMFB	2	1	1	0	0	0.364903903783676	0.278430305779849	0	0	4.29959687610768e-09	4.65408270928367e-05	0	0
GNAI2	2	1	1	0	0	0.302749539039581	0.314011949290401	0	0	4.27491023730499e-06	2.17900252791915e-09	0	0
GP1BB	2	1	1	0	0	0.376901389846893	0.281291862829388	0	0	8.67197724868547e-10	6.61968196830813e-08	0	0
GPM6B	2	1	1	0	0	0.695474437290348	0.50645857561972	0	0	2.0221068100959e-49	7.15506097842628e-38	0	0
GPR37L1	2	1	1	0	0	0.360301720086895	0.374552752016202	0	0	3.26626295707314e-10	4.42816496436774e-11	0	0
GPRC5B	2	1	1	0	0	0.622568567723928	0.328669757106024	0	0	3.12310857214455e-26	8.11820224883844e-08	0	0
GRIN2B	2	1	1	0	0	0.320722378037916	0.312785532243899	0	0	4.68712970159774e-08	1.37944949023719e-08	0	0
GSN	2	1	1	0	0	0.415793133884947	0.402359678092844	0	0	1.09105651185351e-10	4.41010704388774e-15	0	0
GUK1	2	1	1	0	0	0.321111603700008	0.278444404484883	0	0	4.96262337719429e-11	3.28636614593578e-11	0	0
H3F3A	2	1	1	0	0	0.290576641509003	0.267066279205375	0	0	0.00100219149103476	4.97423784939933e-05	0	0
HEPACAM	2	1	1	0	0	0.46964887899983	0.381018848688801	0	0	5.82597832003502e-16	1.85388587544078e-12	0	0
HHATL	2	1	0	1	0	0.329773164510094	0	0.250347777649811	0	2.93102684994104e-09	0	3.89950850609844e-08	0
HLA-C	2	1	0	1	0	0.366529268340193	0	0.468357086612489	0	6.36034019432564e-09	0	8.92439461732707e-25	0
HLA-DPA1	2	1	1	0	0	0.267380916458127	0.31616248775363	0	0	3.20581134325766e-06	2.81777682168851e-11	0	0
HLA-DPB1	2	1	0	1	0	0.294393457758375	0	0.288899644920104	0	2.15682056327096e-07	0	1.0231989377525e-14	0
HMGCR	2	1	0	1	0	0.260127415411818	0	0.347607409147139	0	0.00682696925645681	0	4.07692622817782e-15	0
HMGN2	2	0	1	0	1	0	0.339197359623383	0	0.265552072894121	0	7.86556850906177e-11	0	1.91456596194886e-12
HNRNPC	2	0	1	0	1	0	0.348057014169543	0	0.288998381711211	0	2.30723156585189e-12	0	3.21994357677432e-14
HNRNPDL	2	1	0	1	0	0.348707245570741	0	0.277556664341197	0	4.21502270361299e-10	0	1.31595061293589e-09	0
HPCA	2	0	0	1	1	0	0	0.416551451970492	0.363242477685818	0	0	4.12056567298014e-20	5.91249425083778e-25
HPCAL1	2	1	1	0	0	0.477086343835683	0.423168245960237	0	0	4.0832766568491e-14	8.47080168487614e-16	0	0
HRAS	2	1	1	0	0	0.285059589127356	0.266055667699451	0	0	0.00020476158372448	5.33394304601212e-06	0	0
HSP90AA1	2	0	1	0	1	0	0.47505091617021	0	0.594707506561813	0	6.25545322469977e-66	0	2.15306362770269e-126
HSP90B1	2	0	1	0	1	0	0.579374419421244	0	0.669233246941007	0	4.77235529503247e-39	0	6.73987298190963e-77
HSPA1A	2	0	1	0	1	0	0.624682784049274	0	0.622554596432041	0	5.92423244776653e-31	0	1.47278081056785e-53
HSPA4	2	0	1	0	1	0	0.262953464947312	0	0.264222130789781	0	7.25140788272206e-05	0	2.54293128019009e-11
HSPA5	2	0	1	0	1	0	0.379870732718684	0	0.541314819652771	0	7.05783413305204e-14	0	1.36221563063881e-46
HSPB1	2	0	1	0	1	0	1.15018043269296	0	1.0166651360002	0	7.2969357650656e-87	0	1.93448279550428e-136
HSPD1	2	0	1	0	1	0	0.368326483110424	0	0.321192776655679	0	2.88398622634842e-12	0	1.73279899549344e-17
HSPE1	2	0	1	0	1	0	0.397526915385241	0	0.279383194422873	0	1.19354792457475e-18	0	3.8862042228058e-17
HSPH1	2	0	1	0	1	0	0.394557711918971	0	0.62451087887531	0	7.95051215327213e-18	0	4.79819015255794e-64
ID2	2	1	0	1	0	0.362581663125989	0	0.408976738627866	0	4.77793639004068e-09	0	4.41960436647125e-20	0
IDS	2	1	1	0	0	0.393292569910251	0.342250387388046	0	0	5.46032651268587e-38	2.61638856671136e-37	0	0
IFI27L2	2	1	1	0	0	0.305427982800983	0.274423917369967	0	0	8.74946382915339e-08	1.29010782195635e-07	0	0
IFITM2	2	0	1	0	1	0	0.260309496742495	0	0.352689312024879	0	6.42328189878962e-05	0	4.59847673676567e-21
IFITM3	2	0	1	0	1	0	0.586925214741165	0	0.532300105434846	0	1.19343370872219e-34	0	6.01984735352784e-52
IGFBP5	2	1	1	0	0	0.293273052016355	0.285142925933104	0	0	1.0702939343744e-07	6.31994740084505e-09	0	0
ITGB2	2	0	1	0	1	0	0.357100149384071	0	0.323263534881697	0	2.54281440514578e-18	0	4.16471163903487e-33
ITGB8	2	1	1	0	0	0.2895433840057	0.27345136966058	0	0	2.30847632662862e-07	6.23773376391994e-10	0	0
ITM2C	2	1	1	0	0	0.37991331200976	0.503197826742681	0	0	2.75515562923873e-19	9.07514563770046e-42	0	0
JPH4	2	1	1	0	0	0.418522608021039	0.327846644046134	0	0	6.01210804883848e-13	4.44036723743901e-10	0	0
JUN	2	0	1	0	1	0	0.310651251603346	0	0.334399399273961	0	8.45112173761356e-08	0	9.68574039561681e-20
JUND	2	1	1	0	0	0.416605278160566	0.277018018649114	0	0	2.17719328902367e-13	1.384726952701e-08	0	0
KCNH3	2	1	1	0	0	0.277958269482	0.266299897765386	0	0	0.000277960111230983	2.53651179135258e-06	0	0
KCNQ2	2	0	1	0	1	0	0.287950214061409	0	0.28160857247837	0	3.87961116703177e-08	0	1.42628498201473e-16
KCTD12	2	1	1	0	0	0.350826573707926	0.409700459925671	0	0	5.01084821219625e-11	2.53642614511084e-19	0	0
KIF1A	2	1	1	0	0	0.373119153821466	0.271062673226574	0	0	4.62927653695038e-21	2.69099994285715e-12	0	0
LAMP1	2	1	1	0	0	0.293536175291126	0.297874040286834	0	0	4.82741749248565e-05	1.39833145740601e-06	0	0
LAMP2	2	1	0	1	0	0.344368958503143	0	0.258210771887653	0	2.53922719769517e-06	0	0.000125400866025413	0
LAMP5	2	0	1	0	1	0	0.464296769745399	0	0.396393125583812	0	1.62079103389871e-18	0	1.1242982195974e-24
LARGE1	2	0	0	1	1	0	0	0.293837864231314	0.317796052699564	0	0	2.28893873997665e-12	2.43520839673362e-22
LARP1	2	1	1	0	0	0.26686068630649	0.266156074346455	0	0	0.000719865950778411	4.26392703609904e-05	0	0
LIMCH1	2	1	1	0	0	0.289257824735933	0.332244876098129	0	0	0.000189414170231299	2.09031319843567e-11	0	0
LRPAP1	2	0	0	1	1	0	0	0.368120719035803	0.335453521756819	0	0	1.97065867335897e-18	1.46180553110696e-19
MAL2	2	0	1	0	1	0	0.263630864248216	0	0.274907128018131	0	7.40739910944632e-05	0	9.58276087648749e-12
MAOB	2	0	1	0	1	0	0.341405104941238	0	0.336120392367305	0	3.49670226005494e-10	0	7.31804790698433e-20
MAP1A	2	1	1	0	0	0.383761877934733	0.27084396127925	0	0	4.2580667568821e-22	1.89533881974909e-14	0	0
MAP2	2	1	1	0	0	0.349490589163808	0.348588740312663	0	0	7.727818101422e-17	5.41253439025395e-24	0	0
MAP2K1	2	1	0	1	0	0.341109290710416	0	0.321054815722639	0	5.41225919109676e-08	0	4.58900647843861e-12	0
MAP4	2	1	1	0	0	0.29732317779065	0.317057900583652	0	0	1.99346899427064e-06	7.69468324913886e-11	0	0
MAP4K4	2	1	1	0	0	0.448818420491253	0.31233572223215	0	0	2.98752597810832e-13	3.68960645127026e-10	0	0
MAPK3	2	1	1	0	0	0.334734939114888	0.282094570542508	0	0	4.39592440700048e-08	3.65780525276369e-08	0	0
MAPK8IP1	2	1	1	0	0	0.426940381529745	0.355840713673709	0	0	4.08614471374997e-14	2.50262138349715e-12	0	0
MARCKS	2	1	0	1	0	0.275734752233649	0	0.255732944860568	0	0.00043737215715268	0	2.64089149257987e-06	0
MAZ	2	1	1	0	0	0.309769794465072	0.255096976752869	0	0	5.76069344034705e-06	3.80653576954381e-06	0	0
MBOAT7	2	0	1	0	1	0	0.380273637191338	0	0.285959722526365	0	2.42758201754519e-14	0	5.93516917859601e-14
METRN	2	1	1	0	0	0.559576914487926	0.47795612743948	0	0	4.0250439074164e-21	2.5376895856414e-20	0	0
MGST1	2	0	1	0	1	0	0.697955652719504	0	0.471033318713752	0	1.66432838357461e-38	0	2.97552799227589e-33
MIF	2	0	0	1	1	0	0	0.306316884597138	0.304640821899786	0	0	8.69167892458202e-22	1.19679612875261e-30
MLC1	2	1	1	0	0	0.371616523936931	0.260664819064574	0	0	4.10143306505192e-07	0.000442287303699186	0	0
MOB1B	2	0	1	0	1	0	0.453764047834486	0	0.277145532626139	0	3.5163078431068e-21	0	2.4738588045623e-14
MOBP	2	1	0	1	0	0.371999103805144	0	0.422292019917512	0	9.58506030795501e-09	0	9.42661671034469e-23	0
MRVI1	2	0	1	0	1	0	0.26374952657938	0	0.261558757001093	0	2.58843836420867e-07	0	1.86809111804801e-15
MT-ATP6	2	1	1	0	0	0.752909805306335	0.82137119643164	0	0	9.67473542252929e-75	4.62749424541608e-95	0	0
MT-CO2	2	1	1	0	0	0.446360979730701	0.517963663880366	0	0	3.97439208807436e-66	3.98347131661276e-90	0	0
MT-ND1	2	1	1	0	0	0.485183888410655	0.586939074731012	0	0	1.19799722256217e-62	1.81187727306539e-88	0	0
MT-ND2	2	1	1	0	0	0.55041836260339	0.632533086710859	0	0	1.80930062933561e-59	9.20549349903766e-85	0	0
MT-ND3	2	1	1	0	0	0.830289788069706	0.890544327261283	0	0	2.57228343173601e-75	1.47767201901008e-95	0	0
MT-ND4	2	1	1	0	0	0.676887746695306	0.855791097652178	0	0	4.85000962505687e-75	1.09977023060405e-95	0	0
MT-ND4L	2	1	1	0	0	0.91981745981719	1.22251244129894	0	0	1.00035594705339e-57	1.33974058120499e-88	0	0
MT-ND5	2	1	1	0	0	0.6804133876312	0.918993773427352	0	0	2.92704595357273e-57	2.43173638540309e-89	0	0
MT-ND6	2	1	1	0	0	0.457564539037756	0.384466087985064	0	0	4.79565611784702e-16	4.81048586233171e-15	0	0
MTCH1	2	0	0	1	1	0	0	0.403900273874628	0.416360379669868	0	0	4.96626522624764e-30	1.3650180435631e-48
MTPN	2	1	1	0	0	0.43299659886382	0.319462280417707	0	0	1.55532201386409e-15	2.07174825831611e-11	0	0
MTRNR2L6	2	1	0	1	0	0.602232090089842	0	0.321864991575105	0	1.04752165154119e-27	0	1.2465259980159e-11	0
MTURN	2	1	1	0	0	0.512261847655888	0.461530396517207	0	0	1.33085915319003e-23	8.02406645787453e-27	0	0
MYRF	2	1	0	1	0	0.267955244032065	0	0.354171813720614	0	1.10945381543652e-05	0	7.1910838134963e-25	0
NADK2	2	1	0	1	0	0.342063216185787	0	0.260221253432329	0	2.51375315063656e-08	0	3.24088414818942e-07	0
NDFIP1	2	0	0	1	1	0	0	0.284821852296522	0.282913977759639	0	0	4.72203194168032e-13	5.79996354142383e-19
NDN	2	1	0	1	0	0.280810335254637	0	0.359401194664212	0	0.000247501033164792	0	1.11276948305902e-14	0
NFIB	2	1	1	0	0	0.40061487302366	0.442939682524772	0	0	1.8133637903828e-14	5.75900222301994e-23	0	0
NLK	2	0	1	0	1	0	0.282898394113117	0	0.255360581758771	0	4.94078623933411e-07	0	4.50569203415856e-12
NME4	2	1	1	0	0	0.282556611720985	0.267372323584198	0	0	8.28640581369299e-08	5.28933193026962e-08	0	0
NNAT	2	1	1	0	0	0.405496265123948	0.273879830155044	0	0	2.06647346938515e-12	2.36888040742106e-06	0	0
NOMO1	2	1	0	1	0	0.311429890301818	0	0.326902785605062	0	5.85157497830022e-08	0	6.98688262548864e-16	0
NPC2	2	1	1	0	0	0.258920549818388	0.286753574344815	0	0	0.00181949395864845	2.54500867439191e-07	0	0
NPDC1	2	0	0	1	1	0	0	0.289466194245282	0.324015160737146	0	0	1.09462817393029e-10	8.82724116468894e-21
NPTX2	2	0	1	0	1	0	0.383338828314183	0	0.290005114947164	0	1.04794215631647e-15	0	2.44892337496747e-17
NR2F1	2	1	1	0	0	0.311030721242801	0.297470717565182	0	0	6.11184936507762e-08	3.0501048299647e-09	0	0
NRXN2	2	1	1	0	0	0.552421205203025	0.427478390539061	0	0	2.00384443916136e-26	3.15650402720051e-20	0	0
NSF	2	0	0	1	1	0	0	0.25510378584524	0.255111009999924	0	0	5.04577521567996e-09	7.33728628737195e-14
NTRK2	2	1	1	0	0	0.445538653694251	0.336791089455781	0	0	4.94951200575649e-22	4.69411745408341e-14	0	0
NTSR2	2	1	1	0	0	0.365783910201958	0.257499781312816	0	0	7.64646631509582e-10	2.58140077323216e-06	0	0
NUDT4	2	0	0	1	1	0	0	0.374166069627834	0.490424940151864	0	0	1.32101015893161e-15	6.73717584983403e-40
OLFM2	2	1	1	0	0	0.301789317047847	0.345583707322512	0	0	8.50046766275905e-06	2.12569833751592e-13	0	0
OLIG1	2	1	1	0	0	0.442680079209344	0.275630918120003	0	0	1.94515409185985e-13	4.87172186208955e-05	0	0
PABPC1	2	1	1	0	0	0.305772313863047	0.251919938441701	0	0	6.85047624245474e-06	0.000232835319464092	0	0
PALM	2	1	1	0	0	0.365957536385223	0.396146274604109	0	0	7.26731045373306e-10	3.63319545306971e-17	0	0
PCBP2	2	1	1	0	0	0.397711485558061	0.307849292038664	0	0	5.85079718473056e-13	1.19470551457365e-10	0	0
PCDH17	2	1	0	1	0	0.305752072382179	0	0.29115463685746	0	1.42601843785011e-08	0	3.86345803287951e-15	0
PCSK1N	2	1	0	1	0	0.25123175290572	0	0.281933659540917	0	3.29928291079485e-10	0	7.31900769932239e-18	0
PDE2A	2	1	1	0	0	0.300751830947196	0.3374130836717	0	0	1.69519053488471e-05	4.63101955958338e-10	0	0
PDE4DIP	2	1	0	1	0	0.349796679042931	0	0.268651560790695	0	1.58177582823079e-10	0	3.58517432239025e-09	0
PDIA6	2	0	1	0	1	0	0.406529746991994	0	0.319094551390384	0	2.29817793122566e-16	0	5.41102054196683e-18
PDYN	2	1	0	1	0	0.276381971524884	0	0.290899886247131	0	6.98398662924463e-08	0	5.01083357033901e-22	0
PDZD4	2	1	1	0	0	0.3528044580172	0.460912965738959	0	0	2.34338478737617e-07	2.65209895482547e-21	0	0
PFKL	2	1	1	0	0	0.270570308283843	0.255618521420847	0	0	3.36083794096902e-05	7.70217426143881e-05	0	0
PFN1	2	0	1	0	1	0	0.277352343657775	0	0.254711104565064	0	1.65122611234714e-06	0	1.93529456256038e-11
PHGDH	2	1	1	0	0	0.295603486911123	0.255088833529862	0	0	2.6451069869936e-06	8.24669444766794e-06	0	0
PI4KA	2	0	0	1	1	0	0	0.320942996422511	0.324435007673154	0	0	2.61919944328407e-14	1.65718199301962e-22
PIP4K2A	2	1	0	1	0	0.326586985126068	0	0.32051663500142	0	8.04487077819531e-06	0	1.83715750359596e-10	0
PIP4K2B	2	1	1	0	0	0.381002938375762	0.340859668650461	0	0	1.41670376235753e-12	3.79387942924824e-12	0	0
PLAAT4	2	0	1	0	1	0	0.458113588601784	0	0.417481025497139	0	1.00821692737985e-22	0	6.82426022753977e-38
PLEKHB1	2	1	1	0	0	0.682237480183468	0.488614887430608	0	0	5.804862982602e-29	7.19318537365809e-26	0	0
PLEKHH1	2	1	0	1	0	0.27919526401828	0	0.290612939525951	0	2.65834927425468e-06	0	4.76394936660408e-14	0
PLPP3	2	1	1	0	0	0.451652842630181	0.415791009746635	0	0	5.49579288161887e-13	3.08901767041828e-14	0	0
PLPPR2	2	1	1	0	0	0.303908380424984	0.311454641894111	0	0	3.23733772275352e-06	5.90042826646077e-09	0	0
PLTP	2	1	1	0	0	0.339668005459832	0.466754003123461	0	0	1.18123647907231e-10	1.61640353362908e-23	0	0
PPDPF	2	0	1	0	1	0	0.64954186908884	0	0.43711250025763	0	1.01916521770551e-44	0	2.58837859153963e-40
PPP1R9B	2	1	1	0	0	0.360414777478388	0.269900769937556	0	0	9.90771439899281e-10	8.44890980746606e-07	0	0
PPP2CB	2	1	1	0	0	0.39779296367084	0.373311089543399	0	0	2.69199350963627e-12	3.4303059656039e-15	0	0
PPP2R2C	2	1	1	0	0	0.281350793174614	0.272533173383161	0	0	1.77265238667978e-05	9.54031820579601e-06	0	0
PPP3R1	2	1	1	0	0	0.324050992530768	0.283877081326094	0	0	2.80333487734762e-07	2.15282230443485e-05	0	0
PPP6R1	2	1	1	0	0	0.266630301804454	0.326535512351817	0	0	1.48880268114959e-05	5.89778861410117e-10	0	0
PRDX1	2	1	1	0	0	0.285851261630271	0.276637777029988	0	0	2.97080836638098e-07	1.37566568412251e-07	0	0
PRKCSH	2	1	1	0	0	0.281265903675224	0.251919938441701	0	0	0.000185058955959565	0.00010375387099591	0	0
PSD	2	1	1	0	0	0.395074018369615	0.397016657568247	0	0	1.7277901875242e-14	2.0663894116723e-20	0	0
PSD2	2	1	0	1	0	0.337863999466834	0	0.327658989497738	0	2.72498655417922e-09	0	2.69621236386998e-15	0
PTGER3	2	0	1	0	1	0	0.321194064325107	0	0.314122845180694	0	4.69470942262421e-17	0	5.70495694122143e-41
PTGES3	2	0	1	0	1	0	0.344311379692129	0	0.259710711354384	0	2.79064499238912e-13	0	3.42773551839571e-12
PTMS	2	1	1	0	0	0.474379130133222	0.392296410467033	0	0	1.29393794522263e-18	3.69470364301331e-17	0	0
PTN	2	1	1	0	0	0.411350819112733	0.289693025989212	0	0	1.90798378318359e-11	1.32839644392957e-06	0	0
PTPRF	2	1	1	0	0	0.28006992964309	0.369239903934682	0	0	5.34357072015066e-05	1.44631327638796e-14	0	0
PTPRR	2	1	0	1	0	0.263751148407549	0	0.288210280821943	0	2.28743634403692e-06	0	3.13417221566609e-18	0
PTPRZ1	2	1	1	0	0	0.435637930077899	0.465098777933458	0	0	2.78638752829324e-12	2.97718479300485e-17	0	0
PTTG1IP	2	1	1	0	0	0.304726423174721	0.402018085381895	0	0	1.49533329762917e-07	1.04317532313027e-16	0	0
RAC1	2	1	1	0	0	0.284407903516636	0.290423105201447	0	0	5.2851846357903e-07	4.37689809273448e-10	0	0
RASL10A	2	0	0	1	1	0	0	0.273293334999681	0.265882259800287	0	0	1.48477250962955e-16	6.09678023674124e-17
RCN1	2	0	1	0	1	0	0.366708863147162	0	0.282418124173831	0	5.61794829351054e-18	0	4.86990851822515e-20
RNASEK	2	0	1	0	1	0	0.321231850793777	0	0.250854865632492	0	2.7458679864844e-14	0	3.97233083371516e-14
RNASET2	2	1	1	0	0	0.382921633280758	0.359764390794351	0	0	1.84978775920906e-11	7.87790860350479e-12	0	0
RNF130	2	1	1	0	0	0.260809854611354	0.278547950951453	0	0	0.0609900736813849	1.83175864768181e-07	0	0
RPL11	2	1	1	0	0	0.300713888202793	0.413140724658651	0	0	2.65156240817194e-06	2.83560958305907e-18	0	0
RPL13	2	1	1	0	0	0.344674183726507	0.397168679459692	0	0	1.40786277944696e-21	2.01394170292049e-33	0	0
RPL13A	2	1	1	0	0	0.270283742307854	0.433064170654548	0	0	7.52330649705816e-09	1.56112981773851e-32	0	0
RPL23	2	1	1	0	0	0.300722628812101	0.352076961409275	0	0	2.46965584138427e-06	1.36916410996374e-12	0	0
RPL23A	2	1	1	0	0	0.26518131714934	0.327940411494407	0	0	3.29588840604426e-07	5.55214712627848e-14	0	0
RPL27	2	1	1	0	0	0.271814863516048	0.411950086136733	0	0	2.72040807674456e-07	7.87503397213428e-25	0	0
RPL27A	2	1	1	0	0	0.395626659107877	0.44347519164017	0	0	6.8876868788701e-12	5.65406966333626e-21	0	0
RPL30	2	1	1	0	0	0.31273128418735	0.322300735203501	0	0	1.99701719117849e-10	2.42337916562959e-14	0	0
RPL31	2	1	1	0	0	0.312914877446887	0.359837856648339	0	0	6.23498737199973e-15	9.07354378959861e-29	0	0
RPL39	2	1	1	0	0	0.308358219316389	0.532178560615953	0	0	4.11330384137176e-08	1.20203344043074e-35	0	0
RPLP0	2	1	1	0	0	0.292367152282791	0.462509912782667	0	0	7.09654288315407e-05	5.11731180179171e-22	0	0
RPLP2	2	1	1	0	0	0.284684910448563	0.395573341414387	0	0	3.16597148399027e-09	1.7051205178752e-23	0	0
RPS11	2	1	1	0	0	0.313618311617061	0.440887937950649	0	0	5.33221672016843e-10	8.61078949029989e-28	0	0
RPS18	2	1	1	0	0	0.337146959863308	0.465917297019047	0	0	2.17656994585332e-12	2.22485957952985e-31	0	0
RPS3	2	1	1	0	0	0.252363149272229	0.321772600644396	0	0	0.00298593499782971	1.50249214733054e-11	0	0
RPS6	2	1	1	0	0	0.375794974160407	0.42545031366431	0	0	9.47387565696817e-14	8.49616601299436e-27	0	0
RTN1	2	0	0	1	1	0	0	0.280321521039992	0.391254147281348	0	0	9.86279240915298e-20	6.55945770833715e-58
RTN3	2	0	0	1	1	0	0	0.394337567697671	0.458459474313271	0	0	5.39761694819675e-35	1.19088926336111e-68
RTN4	2	0	0	1	1	0	0	0.255914151646481	0.332156596328836	0	0	2.28055798127028e-13	8.13736442997008e-41
RTP5	2	1	1	0	0	0.265880984835745	0.25365454425391	0	0	4.94822235819818e-08	5.35687932179645e-09	0	0
S100A11	2	0	1	0	1	0	0.348037696284079	0	0.267645748553349	0	3.19397164126652e-14	0	1.94403711294397e-16
S100A9	2	0	1	0	1	0	0.266055667699451	0	0.298206047301229	0	3.20859756454115e-07	0	4.60848796826008e-23
SCOC	2	1	0	1	0	0.307414080772613	0	0.267456408556627	0	2.42159435194719e-06	0	1.15777868337345e-07	0
SDC3	2	1	1	0	0	0.323514958733317	0.290236818366838	0	0	6.45194071252783e-06	5.53994120727251e-08	0	0
SEC11C	2	0	1	0	1	0	0.368576616849199	0	0.326543235142647	0	7.54810329240137e-13	0	3.93258632095706e-18
SEC62	2	1	1	0	0	0.254510992502802	0.297358127593612	0	0	0.0213538738386631	9.27303560030093e-06	0	0
SELENOP	2	1	1	0	0	0.282375216354777	0.312563954573663	0	0	0.000872225083636256	1.52860667063457e-07	0	0
SEMA4D	2	1	1	0	0	0.282238712785715	0.281871957142736	0	0	5.16419989548679e-07	2.91832587133616e-08	0	0
SEMA4F	2	0	1	0	1	0	0.262305483007147	0	0.300145881494296	0	7.80996275179428e-08	0	6.74837240862875e-23
SEMA6B	2	1	1	0	0	0.316271137383975	0.2601628987323	0	0	2.84210311241806e-07	6.65612082364499e-05	0	0
SEPTIN2	2	1	1	0	0	0.481629717383389	0.270954416966702	0	0	6.04385762575839e-18	2.30599849386422e-06	0	0
SERF2	2	0	1	0	1	0	0.475202526986513	0	0.342472986424458	0	1.12797188068926e-32	0	1.81551586790803e-29
SERPINE2	2	1	1	0	0	0.325724697897631	0.312609179122251	0	0	6.33346355797431e-07	1.09302104207305e-08	0	0
SERPINI1	2	0	0	1	1	0	0	0.282908793699123	0.255111900655477	0	0	1.60518357909758e-10	1.45521180628599e-14
SGK1	2	1	0	1	0	0.279485305247602	0	0.360610850059971	0	6.42150167857273e-05	0	1.17693666051764e-22	0
SH3BGRL3	2	1	1	0	0	0.451166579552279	0.35827757837033	0	0	1.48779577849649e-15	1.05490342212716e-11	0	0
SH3GL2	2	0	0	1	1	0	0	0.360073937295395	0.426279527109591	0	0	5.40060673475099e-16	2.41360724647605e-37
SHISAL1	2	1	1	0	0	0.270152861347927	0.261431543997088	0	0	4.59113931916635e-05	1.91768656217297e-06	0	0
SIRT2	2	1	1	0	0	0.283621360776464	0.279423476017443	0	0	0.00068738496161491	2.24244381486389e-06	0	0
SLC1A3	2	1	1	0	0	0.557203209879906	0.672009176305724	0	0	3.93543003186141e-22	2.90903529792804e-41	0	0
SLC23A2	2	1	0	1	0	0.323500848158146	0	0.272348686810858	0	6.89140635576107e-09	0	1.46011567982091e-10	0
SLC25A22	2	1	0	1	0	0.358547105907476	0	0.465184938263557	0	1.65322246053058e-10	0	2.13677972156609e-27	0
SLC25A23	2	1	1	0	0	0.352432636372896	0.419765848996775	0	0	6.87581183542285e-08	1.51477861593644e-15	0	0
SLC30A3	2	0	1	0	1	0	0.318867210553824	0	0.459023728738923	0	4.34288955426463e-08	0	9.62398184355255e-38
SLC39A10	2	0	0	1	1	0	0	0.297889221927919	0.378494446060821	0	0	2.63744624413293e-09	2.617084888461e-22
SLC3A2	2	1	1	0	0	0.299435011881478	0.306569594394953	0	0	1.51310836281012e-07	1.45250101367682e-08	0	0
SLC44A1	2	1	0	1	0	0.299489388439153	0	0.259232206133857	0	2.68063358612059e-06	0	9.90263500223466e-09	0
SLC44A2	2	1	1	0	0	0.264048989065	0.351903369133695	0	0	1.2855008879666e-05	5.31301772963949e-12	0	0
SLC4A3	2	1	1	0	0	0.285240223278291	0.272897199516167	0	0	0.000168663881329555	5.14712138975977e-07	0	0
SLC7A5	2	1	1	0	0	0.27586824278939	0.312277331724761	0	0	0.00117523032661942	2.22904541909293e-09	0	0
SLCO1A2	2	1	0	1	0	0.253092548267864	0	0.259037971659864	0	4.29467490884914e-06	0	1.27859667178166e-15	0
SLIT1	2	1	0	1	0	0.33135882009264	0	0.336147097982847	0	2.98925769960692e-07	0	1.26517047479683e-13	0
SLIT3	2	1	0	1	0	0.294866096699388	0	0.339451443972817	0	9.86384600439027e-10	0	2.36237059709296e-29	0
SMARCD3	2	1	0	1	0	0.429781756771819	0	0.31996147683837	0	6.3561128678159e-14	0	7.31805739585136e-12	0
SMIM29	2	0	1	0	1	0	0.274546729774175	0	0.289500279441233	0	0.000162300958164671	0	3.63426570185311e-13
SNCG	2	0	0	1	1	0	0	0.297096583110974	0.353511188400383	0	0	8.40949252696735e-11	2.42628337023954e-28
SNX3	2	0	1	0	1	0	0.354274045439116	0	0.312055152183938	0	7.34673332937428e-14	0	6.01124111428667e-18
SOD2	2	0	1	0	1	0	0.638232934951463	0	0.630314795006087	0	4.23372557954002e-44	0	3.23579459005169e-69
SORBS2	2	1	1	0	0	0.284237601229666	0.276762854743877	0	0	8.62752495030836e-06	2.83992347402e-08	0	0
SOX2	2	1	1	0	0	0.345880361600409	0.317800191695319	0	0	5.51819485172327e-09	8.07564711615195e-12	0	0
SPARC	2	1	0	1	0	0.289453431410657	0	0.311325582384752	0	1.05006761463652e-05	0	2.4407699800973e-12	0
SPP1	2	0	1	0	1	0	0.954429147539192	0	1.03601190053212	0	2.09326215011297e-50	0	7.48448042055702e-97
SPRED1	2	0	1	0	1	0	0.29508327589967	0	0.261246661397297	0	3.03532923505963e-07	0	9.4070298149012e-12
SPTBN2	2	1	1	0	0	0.253746071872432	0.261280934190796	0	0	0.00112558812502779	1.4490704758864e-05	0	0
SSTR1	2	0	1	0	1	0	0.302295238099659	0	0.346107186245542	0	2.36924396803671e-09	0	6.38894330260949e-29
ST8SIA3	2	1	1	0	0	0.266784968883875	0.330594188837022	0	0	0.000608232365332004	2.25557466683232e-10	0	0
STMN1	2	0	0	1	1	0	0	0.597117688607447	0.611493678932327	0	0	2.32431238328567e-67	4.52973266751567e-101
STMN4	2	0	0	1	1	0	0	0.41745740649419	0.426700006714817	0	0	1.06909516180415e-17	1.90636817017278e-32
STX1A	2	0	0	1	1	0	0	0.389751244519673	0.298705290126662	0	0	4.30664275872258e-19	4.44278812782447e-15
STXBP1	2	0	0	1	1	0	0	0.279741751937553	0.255253233790229	0	0	2.91465365198515e-15	4.07723881885532e-21
SVOP	2	0	0	1	1	0	0	0.262428979752617	0.328101702805292	0	0	4.24129594760016e-09	8.0052267989464e-20
SYN1	2	1	0	1	0	0.352038361242607	0	0.314340518843761	0	2.35652065645224e-18	0	9.12953139696519e-20	0
SYNPO	2	1	1	0	0	0.377007372571808	0.607445061065033	0	0	6.65976402284128e-08	8.48145748100136e-33	0	0
TCF4	2	1	1	0	0	0.336607543799465	0.269535206051197	0	0	1.26786829593504e-09	3.12389333125809e-06	0	0
TENM3	2	1	0	1	0	0.302135431911991	0	0.295267048410553	0	3.93567902913248e-10	0	2.98740332895698e-18	0
THRA	2	1	1	0	0	0.503619760889758	0.473931746882872	0	0	2.94447317584155e-20	5.08871447281011e-25	0	0
TIMP1	2	0	1	0	1	0	0.329163950345634	0	0.28044440515155	0	2.32911644091677e-11	0	3.70093455316493e-15
TKFC	2	1	0	1	0	0.269846676409834	0	0.288805037196405	0	1.45703302998712e-05	0	3.43125071738578e-15	0
TKT	2	0	1	0	1	0	0.291478999875259	0	0.330727452664321	0	2.27739576554081e-07	0	1.58280590043645e-19
TMBIM1	2	0	1	0	1	0	0.447433463966919	0	0.257288266656094	0	2.40707103641715e-18	0	6.69994151217121e-10
TMBIM6	2	1	1	0	0	0.502271308340963	0.408277776661435	0	0	9.67966128845792e-19	1.27867305224225e-19	0	0
TMED9	2	1	1	0	0	0.267619954842	0.339193909223741	0	0	1.0192524026506e-05	1.67108381938484e-11	0	0
TMEFF2	2	1	0	1	0	0.251015256790682	0	0.304527800061424	0	0.000975094829251889	0	1.22924023048773e-13	0
TMEM130	2	0	0	1	1	0	0	0.442456200397179	0.434857847790964	0	0	7.30748855557244e-25	3.06271348036157e-40
TMEM158	2	0	1	0	1	0	0.343316890311178	0	0.280403064900609	0	2.53766759856816e-13	0	8.69710634277205e-17
TMEM47	2	1	1	0	0	0.368038702589047	0.320257487529725	0	0	7.88662184290778e-12	1.15268837220289e-10	0	0
TMEM50A	2	1	1	0	0	0.26106658303688	0.277333982737158	0	0	4.45765720700121e-05	1.08452224112964e-08	0	0
TMSB10	2	0	0	1	1	0	0	0.435196140456481	0.42156146837315	0	0	8.29520194570612e-65	1.05067637751919e-85
TNR	2	1	1	0	0	0.388916287610603	0.326388881202211	0	0	2.82345292917276e-13	1.31756744932316e-12	0	0
TOB2	2	1	1	0	0	0.264854466353817	0.269884644936548	0	0	3.11892543005237e-07	7.47914892958357e-09	0	0
TP53I11	2	0	1	0	1	0	0.375189772740917	0	0.266651083019215	0	1.62912042301328e-15	0	1.53874424100356e-14
TPM1	2	1	1	0	0	0.252162245203246	0.269479383010222	0	0	0.00195753387390592	6.37312151350452e-05	0	0
TPT1	2	1	1	0	0	0.311318520054592	0.458071117641297	0	0	6.61422402597287e-15	6.13542393831565e-43	0	0
TRIL	2	1	0	1	0	0.382791341064086	0	0.420833164634374	0	7.8791570224514e-11	0	1.79343612569902e-23	0
TSC22D4	2	1	1	0	0	0.614755421621324	0.659347526693017	0	0	4.78041570836211e-22	1.55047852888774e-36	0	0
TSPAN3	2	1	1	0	0	0.313475547962049	0.402870181363564	0	0	5.05515360655897e-08	4.07826174024678e-22	0	0
TSPYL4	2	1	1	0	0	0.302475385763955	0.261952112807639	0	0	3.34614735054007e-06	0.00014889624237471	0	0
TTC3	2	1	1	0	0	0.384299223460828	0.29285728757126	0	0	2.85548411475476e-10	1.97535884599519e-08	0	0
TTC9B	2	0	0	1	1	0	0	0.283319019515538	0.40523792934931	0	0	1.85011733052451e-08	1.20527745059595e-28
TTYH2	2	1	0	1	0	0.280155612628338	0	0.252372069839041	0	3.79622855947237e-05	0	3.3923687077513e-08	0
TUBA1B	2	0	0	1	1	0	0	0.658671022866528	0.411961970918382	0	0	2.04356502694125e-92	2.9498377277799e-78
TUBB	2	1	0	1	0	0.445885520991922	0	0.643291740603772	0	2.49377956855034e-21	0	9.86244731502544e-53	0
TUBB4A	2	1	0	1	0	0.402844622867577	0	0.308671174081332	0	4.60430657077456e-21	0	5.33782720151133e-18	0
TYROBP	2	1	1	0	0	0.271721726827542	0.353203759433979	0	0	3.21017553995376e-07	1.37592155764445e-16	0	0
UBA1	2	1	1	0	0	0.345396225839288	0.283106104886411	0	0	1.2190709024939e-10	2.0729467893226e-06	0	0
UBA52	2	1	1	0	0	0.332153416876601	0.447877349451754	0	0	1.02749984048176e-11	6.14086934279501e-30	0	0
UCHL1	2	0	0	1	1	0	0	0.383561681281145	0.355083522474189	0	0	3.12200688913787e-45	6.38434159883567e-64
UHMK1	2	1	0	1	0	0.384733581161218	0	0.335306450429727	0	8.1872377566829e-12	0	3.848758444479e-14	0
VSIG4	2	0	1	0	1	0	0.413975797776073	0	0.434144755113442	0	4.20553347537287e-19	0	2.46833780298789e-46
YWHAB	2	1	0	1	0	0.316821352762004	0	0.362893843613632	0	2.07939366933198e-10	0	5.80721414688532e-21	0
YWHAE	2	1	1	0	0	0.442653132084565	0.345172877852044	0	0	1.69765536582836e-28	3.36509502956686e-26	0	0
YWHAG	2	0	0	1	1	0	0	0.267207219262396	0.299715152905905	0	0	1.41196257554621e-16	2.1477787526262e-35
YWHAH	2	0	0	1	1	0	0	0.434631558276618	0.569359237167065	0	0	1.42691149631592e-45	6.99303203787219e-95
YWHAZ	2	0	0	1	1	0	0	0.510968887139288	0.548792683412886	0	0	1.89758139317779e-47	1.10395771924114e-76
ZBTB18	2	0	1	0	1	0	0.376717086493443	0	0.352051769918522	0	3.24046425861909e-15	0	1.21354573727186e-23
ZCCHC12	2	0	1	0	1	0	0.318184733134397	0	0.283636121449934	0	1.42002704758035e-11	0	5.16884908382058e-18
ZCCHC17	2	0	1	0	1	0	0.275671126398893	0	0.251136904558833	0	1.28538985619984e-06	0	3.10215364636733e-10
ZNF706	2	1	1	0	0	0.370804956081937	0.325326212367645	0	0	1.89303184868577e-11	2.57971997189916e-10	0	0
A2M	1	1	0	0	0	0.354013227234543	0	0	0	5.30103052593636e-07	0	0	0
ABHD17A	1	1	0	0	0	0.267955244032065	0	0	0	0.000592313312804123	0	0	0
ACADSB	1	0	0	1	0	0	0	0.252068423038664	0	0	0	4.45991884750528e-10	0
ACOT7	1	0	0	0	1	0	0	0	0.29993354763618	0	0	0	2.2208532043539e-13
ACSBG1	1	1	0	0	0	0.276471509063557	0	0	0	2.94201490954833e-05	0	0	0
ACSS1	1	1	0	0	0	0.266604804934193	0	0	0	1.423296538151e-06	0	0	0
ACTR3	1	1	0	0	0	0.267478106846074	0	0	0	0.00013967921602678	0	0	0
ADCY5	1	1	0	0	0	0.263285167222998	0	0	0	3.41801788552342e-05	0	0	0
ADCYAP1R1	1	1	0	0	0	0.380449363075386	0	0	0	9.8097967482535e-13	0	0	0
ADGRV1	1	1	0	0	0	0.271023907736628	0	0	0	1.52729002489433e-06	0	0	0
ADSS	1	0	0	1	0	0	0	0.261385120161319	0	0	0	6.94261243028959e-12	0
AGAP3	1	1	0	0	0	0.287473860118284	0	0	0	1.3754425152002e-06	0	0	0
AGPAT1	1	0	1	0	0	0	0.25741218345548	0	0	0	0.000212559503944182	0	0
AHCYL2	1	1	0	0	0	0.295957820413519	0	0	0	2.15257344054171e-09	0	0	0
AHDC1	1	1	0	0	0	0.263159071768572	0	0	0	8.6861821320445e-05	0	0	0
AHNAK	1	1	0	0	0	0.254790822098055	0	0	0	0.000116978952100781	0	0	0
AHSA1	1	0	0	0	1	0	0	0	0.280951167269259	0	0	0	3.66038637920332e-12
AIDA	1	0	1	0	0	0	0.254127096834177	0	0	0	3.61988669310292e-06	0	0
AIF1L	1	1	0	0	0	0.257608641237923	0	0	0	8.1206353092539e-07	0	0	0
AK1	1	1	0	0	0	0.272056592640174	0	0	0	0.000185559139706353	0	0	0
AL359091.1	1	0	0	1	0	0	0	0.272602965624661	0	0	0	2.21694258940178e-18	0
ALDH2	1	1	0	0	0	0.293789577213269	0	0	0	0.000959242722973078	0	0	0
ANKRD12	1	1	0	0	0	0.330541004717787	0	0	0	6.1185307495543e-08	0	0	0
ANKRD40	1	0	1	0	0	0	0.25111679005703	0	0	0	0.000748748707868988	0	0
ANLN	1	0	0	1	0	0	0	0.309235465356213	0	0	0	1.5604160138138e-23	0
ANOS1	1	0	0	1	0	0	0	0.281179097537078	0	0	0	4.05308702186378e-20	0
ANP32A	1	1	0	0	0	0.276115992398387	0	0	0	8.79571340601883e-05	0	0	0
ANP32B	1	1	0	0	0	0.263192457963383	0	0	0	4.85794445924323e-06	0	0	0
AP2B1	1	0	1	0	0	0	0.270965661197007	0	0	0	2.03631050640875e-05	0	0
APBA1	1	1	0	0	0	0.263214811575169	0	0	0	4.2462331473782e-05	0	0	0
APBB1	1	0	1	0	0	0	0.266186224524494	0	0	0	1.09528795472172e-08	0	0
APCDD1	1	1	0	0	0	0.268898017741944	0	0	0	4.05300481751531e-06	0	0	0
APOC2	1	0	1	0	0	0	0.363401816988874	0	0	0	8.6713390313693e-16	0	0
AQP1	1	0	0	0	1	0	0	0	0.261009420694498	0	0	0	9.64853161665214e-24
ARHGAP35	1	1	0	0	0	0.334781480832565	0	0	0	4.46169046366805e-07	0	0	0
ARHGDIB	1	0	1	0	0	0	0.271272503789165	0	0	0	8.50192508909243e-09	0	0
ARID1A	1	1	0	0	0	0.297151891142025	0	0	0	8.08060947713408e-07	0	0	0
ARNT2	1	0	1	0	0	0	0.316820318398149	0	0	0	2.17345253895472e-11	0	0
ARPC3	1	0	1	0	0	0	0.250563270210282	0	0	0	0.00025279254325702	0	0
ARPP21	1	0	1	0	0	0	0.258765234436772	0	0	0	1.79339458363125e-05	0	0
ARRB1	1	1	0	0	0	0.272234573651439	0	0	0	0.00339615133874927	0	0	0
ATN1	1	1	0	0	0	0.36156618808343	0	0	0	4.34726973469771e-10	0	0	0
ATP2A2	1	0	0	0	1	0	0	0	0.291328308619081	0	0	0	4.2592624320488e-21
ATP6V0E1	1	0	1	0	0	0	0.254254072899359	0	0	0	9.02651562563907e-06	0	0
ATP6V1C1	1	0	0	0	1	0	0	0	0.274391595809221	0	0	0	1.26442775242377e-12
ATP9A	1	0	1	0	0	0	0.277875995165093	0	0	0	4.50769250531451e-08	0	0
ATRX	1	1	0	0	0	0.254779099524481	0	0	0	0.000626454300319402	0	0	0
B3GALT2	1	0	0	1	0	0	0	0.274733565685503	0	0	0	1.38283413288385e-12	0
B4GALNT1	1	0	1	0	0	0	0.251617137530985	0	0	0	0.00013417294698274	0	0
B4GALNT4	1	1	0	0	0	0.263327748500017	0	0	0	0.000131301081282477	0	0	0
B4GAT1	1	0	0	1	0	0	0	0.273117578808217	0	0	0	1.64648132085795e-10	0
BAALC	1	0	1	0	0	0	0.265344598695799	0	0	0	9.08152526046019e-08	0	0
BANF1	1	0	1	0	0	0	0.290045660591699	0	0	0	8.57114575126061e-08	0	0
BASP1	1	0	0	1	0	0	0	0.265328059074162	0	0	0	8.13551234561196e-12	0
BCAP31	1	0	1	0	0	0	0.269465337869139	0	0	0	7.80473080216231e-07	0	0
BCAR1	1	0	1	0	0	0	0.290987707034933	0	0	0	2.11734055560528e-09	0	0
BCAS1	1	1	0	0	0	0.369145509564239	0	0	0	9.82120981798153e-10	0	0	0
BDH2	1	1	0	0	0	0.281977143622384	0	0	0	1.79946145275808e-07	0	0	0
BEX1	1	0	0	0	1	0	0	0	0.381651864285956	0	0	0	3.00159427488862e-35
BEX2	1	0	0	1	0	0	0	0.280190919057101	0	0	0	4.36481101738979e-10	0
BGN	1	0	1	0	0	0	0.258915613565974	0	0	0	8.56264655493228e-08	0	0
BHLHE41	1	0	1	0	0	0	0.28362405806893	0	0	0	8.62228099766822e-08	0	0
BLCAP	1	1	0	0	0	0.378233693440631	0	0	0	3.65565592713239e-11	0	0	0
BOK	1	0	0	1	0	0	0	0.290716976146935	0	0	0	5.52715716238214e-14	0
BRI3	1	0	1	0	0	0	0.250812607545179	0	0	0	0.000170432565309265	0	0
BRK1	1	0	1	0	0	0	0.268567780988971	0	0	0	4.13051579358181e-05	0	0
BSN	1	0	1	0	0	0	0.259489039975562	0	0	0	1.21407435487322e-06	0	0
BTBD3	1	0	1	0	0	0	0.32999821960628	0	0	0	1.50808274320318e-09	0	0
C1S	1	0	0	0	1	0	0	0	0.279286564055063	0	0	0	3.02211204648178e-19
C4orf48	1	0	1	0	0	0	0.268714065366061	0	0	0	2.60687923641819e-06	0	0
CA11	1	0	1	0	0	0	0.337130452426268	0	0	0	5.09140133727301e-14	0	0
CACNB3	1	0	1	0	0	0	0.252352670284535	0	0	0	0.00254698221961303	0	0
CALM1	1	0	0	0	1	0	0	0	0.297158763391802	0	0	0	1.28575378398437e-63
CALN1	1	1	0	0	0	0.334914655164015	0	0	0	7.683933234969e-11	0	0	0
CAMK1	1	0	0	0	1	0	0	0	0.299268490397186	0	0	0	5.72056512264176e-18
CAMK2B	1	1	0	0	0	0.384271438350866	0	0	0	9.20386313571329e-14	0	0	0
CAPZA2	1	1	0	0	0	0.279144676784801	0	0	0	9.74660455561944e-05	0	0	0
CASD1	1	1	0	0	0	0.292260393701969	0	0	0	1.15336780445115e-05	0	0	0
CASTOR2	1	1	0	0	0	0.25159525186172	0	0	0	0.000516433568858914	0	0	0
CBX5	1	1	0	0	0	0.273629018117973	0	0	0	0.0846567165373199	0	0	0
CCDC6	1	0	1	0	0	0	0.276774676262588	0	0	0	3.07195556091979e-06	0	0
CCDC88A	1	1	0	0	0	0.274092115087175	0	0	0	2.15978475980769e-06	0	0	0
CD151	1	0	1	0	0	0	0.292437832674097	0	0	0	4.95503169728746e-09	0	0
CD44	1	0	0	0	1	0	0	0	0.299824699541961	0	0	0	2.63977380102763e-40
CD47	1	0	0	0	1	0	0	0	0.255510248749996	0	0	0	2.87895994205668e-10
CD59	1	0	1	0	0	0	0.294075347305835	0	0	0	1.64720352309693e-09	0	0
CD9	1	0	0	1	0	0	0	0.25376089465373	0	0	0	5.05054200339581e-10	0
CDC42	1	1	0	0	0	0.295013567574157	0	0	0	2.47001604213055e-05	0	0	0
CDC42BPB	1	1	0	0	0	0.259420341582228	0	0	0	0.000461930590340407	0	0	0
CDC42SE2	1	1	0	0	0	0.250255666932664	0	0	0	0.000765296648501717	0	0	0
CDH22	1	0	1	0	0	0	0.282433465976407	0	0	0	1.39893234645881e-09	0	0
CDIP1	1	0	1	0	0	0	0.266055667699451	0	0	0	8.90403662172436e-07	0	0
CDK14	1	0	0	0	1	0	0	0	0.253022751197944	0	0	0	4.76912827365399e-11
CDK17	1	1	0	0	0	0.272534705553764	0	0	0	9.72726254832773e-05	0	0	0
CDK18	1	0	0	1	0	0	0	0.341038822578379	0	0	0	7.95673352726465e-19	0
CDK2AP2	1	0	1	0	0	0	0.303668858182921	0	0	0	1.43695091992781e-09	0	0
CDK5R1	1	0	0	0	1	0	0	0	0.283290021851964	0	0	0	1.12287548091891e-11
CELF1	1	1	0	0	0	0.256190402452479	0	0	0	0.068685070601719	0	0	0
CELF2	1	1	0	0	0	0.294302270473038	0	0	0	2.21603723957471e-05	0	0	0
CELF3	1	0	1	0	0	0	0.256499280979233	0	0	0	7.6269041486139e-05	0	0
CERS6	1	0	1	0	0	0	0.252445010651192	0	0	0	1.50962478403793e-05	0	0
CHD5	1	1	0	0	0	0.348745499654368	0	0	0	3.13893056193824e-09	0	0	0
CHL1	1	0	0	0	1	0	0	0	0.287120610683562	0	0	0	1.73856073645877e-12
CHRM1	1	0	1	0	0	0	0.289214718755648	0	0	0	2.73050437511834e-07	0	0
CHST1	1	0	1	0	0	0	0.368822628735637	0	0	0	9.54217398459967e-13	0	0
CIAO2B	1	0	1	0	0	0	0.253045430963436	0	0	0	8.13671698464815e-06	0	0
CLCN6	1	1	0	0	0	0.253628351411303	0	0	0	0.0191231011210053	0	0	0
CLCN7	1	1	0	0	0	0.255078273592595	0	0	0	0.00132185332089641	0	0	0
CLK1	1	1	0	0	0	0.308233033728592	0	0	0	1.45591402809419e-06	0	0	0
CLPTM1	1	0	1	0	0	0	0.262721152408467	0	0	0	0.00015360954454585	0	0
CLU	1	0	1	0	0	0	0.455452007620321	0	0	0	8.17149217137606e-77	0	0
CMIP	1	1	0	0	0	0.293464421263901	0	0	0	4.70424982918929e-05	0	0	0
CMTM4	1	0	1	0	0	0	0.254014730970808	0	0	0	1.25537728232937e-05	0	0
CNN3	1	0	1	0	0	0	0.340703596669747	0	0	0	2.41991120137531e-09	0	0
CNTN2	1	0	0	1	0	0	0	0.273096581432888	0	0	0	5.75595007955651e-09	0
COL5A3	1	0	1	0	0	0	0.272897199516167	0	0	0	4.89374947608293e-08	0	0
COMT	1	1	0	0	0	0.289648068643325	0	0	0	4.50656218651771e-06	0	0	0
CPEB2	1	1	0	0	0	0.258582109709218	0	0	0	7.72072266801295e-06	0	0	0
CRIP2	1	0	1	0	0	0	0.309934833662256	0	0	0	1.43127275109769e-08	0	0
CRYM	1	0	0	0	1	0	0	0	0.252930073865594	0	0	0	4.76834590655562e-10
CSTB	1	0	1	0	0	0	0.407331255057405	0	0	0	1.20322208933614e-16	0	0
CTBP1	1	1	0	0	0	0.273028103374141	0	0	0	0.00419587478363063	0	0	0
CTDNEP1	1	1	0	0	0	0.278610892687789	0	0	0	4.9587378369047e-05	0	0	0
CXCL14	1	0	1	0	0	0	0.31797989904929	0	0	0	8.00430095790132e-09	0	0
CYB5B	1	0	1	0	0	0	0.259825117948815	0	0	0	4.1321815181517e-06	0	0
CYBA	1	0	1	0	0	0	0.357522583455436	0	0	0	9.84038153858436e-14	0	0
CYFIP2	1	0	0	1	0	0	0	0.275808582036764	0	0	0	6.7385193719702e-09	0
DAG1	1	1	0	0	0	0.250255666932664	0	0	0	0.000197406350325627	0	0	0
DBNL	1	1	0	0	0	0.266329491763725	0	0	0	5.54786447811782e-05	0	0	0
DCTN1	1	0	0	1	0	0	0	0.28250313316901	0	0	0	9.77255119979381e-11	0
DDA1	1	1	0	0	0	0.250255666932664	0	0	0	0.00345182948051935	0	0	0
DDX6	1	1	0	0	0	0.261140907612335	0	0	0	3.8895459397177e-05	0	0	0
DEAF1	1	1	0	0	0	0.336520942268642	0	0	0	6.81639725791589e-09	0	0	0
DGKG	1	1	0	0	0	0.274680218939739	0	0	0	8.6177222781609e-06	0	0	0
DGKZ	1	1	0	0	0	0.298806911019727	0	0	0	2.56113308357539e-07	0	0	0
DHCR24	1	0	0	0	1	0	0	0	0.292647872806093	0	0	0	5.71034014025652e-15
DIXDC1	1	0	0	1	0	0	0	0.293380093566419	0	0	0	1.78872104810784e-16	0
DMWD	1	1	0	0	0	0.255243208443703	0	0	0	0.000266861588775831	0	0	0
DNAJB4	1	0	1	0	0	0	0.288727034718414	0	0	0	4.99553152676115e-09	0	0
DNM2	1	1	0	0	0	0.279442288019196	0	0	0	6.03666763717409e-07	0	0	0
DPP6	1	0	0	0	1	0	0	0	0.260719500238579	0	0	0	8.33977794300443e-10
DST	1	1	0	0	0	0.281217892536631	0	0	0	0.00135368962247783	0	0	0
DVL1	1	1	0	0	0	0.317246535748942	0	0	0	9.05473484961405e-08	0	0	0
DYNLL1	1	0	0	0	1	0	0	0	0.337081671804485	0	0	0	3.24159703441267e-39
DYNLL2	1	0	1	0	0	0	0.305231184134006	0	0	0	1.78409331814744e-12	0	0
ECH1	1	1	0	0	0	0.251628350744636	0	0	0	0.000835020593400865	0	0	0
EDIL3	1	0	1	0	0	0	0.28207015741989	0	0	0	2.51486213645254e-05	0	0
EEF1A1	1	0	1	0	0	0	0.269737944348325	0	0	0	1.06695332874756e-27	0	0
EFEMP1	1	1	0	0	0	0.255419824480898	0	0	0	0.00364046070389314	0	0	0
EFHD2	1	0	0	1	0	0	0	0.307399813707419	0	0	0	2.47192443575888e-12	0
EFR3B	1	0	1	0	0	0	0.340163639853173	0	0	0	2.01646966271868e-11	0	0
EI24	1	0	1	0	0	0	0.253764493337124	0	0	0	4.56065646999098e-05	0	0
EIF1	1	0	1	0	0	0	0.253904849916938	0	0	0	2.87066719419757e-14	0	0
EIF4A2	1	0	0	0	1	0	0	0	0.313971428679035	0	0	0	2.16203272867001e-36
EIF4G2	1	0	0	0	1	0	0	0	0.259902784165344	0	0	0	7.10210148981197e-11
ELFN2	1	0	1	0	0	0	0.27084279514133	0	0	0	1.8173160954867e-08	0	0
ELMO1	1	0	0	0	1	0	0	0	0.251307347055713	0	0	0	1.05686038392117e-08
ELOVL5	1	1	0	0	0	0.255243208443703	0	0	0	5.26240250854686e-05	0	0	0
EMC10	1	1	0	0	0	0.267350100291964	0	0	0	0.00122654841050035	0	0	0
ENO1	1	0	1	0	0	0	0.273469031108289	0	0	0	5.31475300535894e-14	0	0
ENOPH1	1	1	0	0	0	0.266458909771127	0	0	0	0.00070262015256234	0	0	0
ENSA	1	0	1	0	0	0	0.30035456511088	0	0	0	1.34342547910515e-08	0	0
ERH	1	1	0	0	0	0.281027325599418	0	0	0	6.10766668470487e-06	0	0	0
EZR	1	1	0	0	0	0.453132533449406	0	0	0	1.44446781889246e-14	0	0	0
FAM168A	1	1	0	0	0	0.253352603443197	0	0	0	0.00200335550460137	0	0	0
FARP1	1	0	1	0	0	0	0.339497934735944	0	0	0	5.37306766505324e-11	0	0
FBXW7	1	0	1	0	0	0	0.254593007698328	0	0	0	3.04529217667449e-05	0	0
FEZ1	1	1	0	0	0	0.253813485170973	0	0	0	0.0159084234394021	0	0	0
FGD5-AS1	1	1	0	0	0	0.28171061910055	0	0	0	0.00062967515568275	0	0	0
FGF1	1	0	1	0	0	0	0.304807825791665	0	0	0	8.01522384484521e-09	0	0
FGFR1	1	1	0	0	0	0.251099905057945	0	0	0	0.00118080117719436	0	0	0
FGFR2	1	1	0	0	0	0.253662825254278	0	0	0	0.000278707423142162	0	0	0
FKBP4	1	0	0	0	1	0	0	0	0.362024979412175	0	0	0	1.42198355911579e-24
FKBP5	1	0	1	0	0	0	0.256518601104041	0	0	0	3.31046950098034e-07	0	0
FLOT1	1	1	0	0	0	0.251800068784038	0	0	0	0.00120035089490735	0	0	0
FLOT2	1	0	1	0	0	0	0.272128348909893	0	0	0	2.15889109416961e-05	0	0
FLRT2	1	0	1	0	0	0	0.271054664801711	0	0	0	4.93352572166843e-08	0	0
FMNL2	1	1	0	0	0	0.378144438569983	0	0	0	3.09178264191255e-11	0	0	0
FOXG1	1	1	0	0	0	0.279207488882432	0	0	0	0.000830185446650474	0	0	0
FTH1	1	0	1	0	0	0	0.300637092378789	0	0	0	6.5131864328595e-56	0	0
FUS	1	1	0	0	0	0.307039478782842	0	0	0	3.39738856430614e-05	0	0	0
FXR1	1	0	1	0	0	0	0.264353953419826	0	0	0	0.000254464840947885	0	0
FYN	1	1	0	0	0	0.277232254630866	0	0	0	0.000104104546965438	0	0	0
G6PC3	1	1	0	0	0	0.258287838629928	0	0	0	4.64067176283676e-06	0	0	0
GABRA2	1	0	1	0	0	0	0.257653993045831	0	0	0	4.59361600952814e-06	0	0
GABRB3	1	0	1	0	0	0	0.263437738245774	0	0	0	5.15590079498433e-05	0	0
GALNT16	1	1	0	0	0	0.282258398018838	0	0	0	0.000301601139356329	0	0	0
GAPDH	1	0	0	0	1	0	0	0	0.374290174830022	0	0	0	8.5636239610416e-92
GATB	1	0	1	0	0	0	0.318132689105137	0	0	0	4.22465414842769e-12	0	0
GBA	1	1	0	0	0	0.261591820719	0	0	0	5.21675959696213e-05	0	0	0
GDI1	1	1	0	0	0	0.298341853600302	0	0	0	6.18923350658264e-14	0	0	0
GLG1	1	1	0	0	0	0.255636845837181	0	0	0	7.11181345630949e-05	0	0	0
GLOD4	1	1	0	0	0	0.315046172448537	0	0	0	4.55695015855027e-07	0	0	0
GNA12	1	0	1	0	0	0	0.323246944386311	0	0	0	1.23445677148768e-10	0	0
GNAQ	1	1	0	0	0	0.28203916419632	0	0	0	7.0649733321438e-06	0	0	0
GNG7	1	0	1	0	0	0	0.291048958400348	0	0	0	3.19663357952563e-08	0	0
GNPTAB	1	1	0	0	0	0.260360688790859	0	0	0	0.000210138036874194	0	0	0
GPC1	1	1	0	0	0	0.278000195566319	0	0	0	0.000347817649544973	0	0	0
GPR37	1	0	0	1	0	0	0	0.290899886247131	0	0	0	6.16136155180299e-26	0
GRIN1	1	1	0	0	0	0.319756023840301	0	0	0	1.56713570593227e-16	0	0	0
GRK2	1	1	0	0	0	0.27026205012998	0	0	0	0.000156190537437381	0	0	0
GRK3	1	1	0	0	0	0.256334713009046	0	0	0	0.00101994284601057	0	0	0
GRM3	1	0	0	1	0	0	0	0.271786024258589	0	0	0	5.9282594950118e-09	0
GSTP1	1	0	1	0	0	0	0.288621065588796	0	0	0	3.05924893354891e-06	0	0
H2AFV	1	1	0	0	0	0.34848500696241	0	0	0	1.34410455581059e-08	0	0	0
H3F3B	1	0	1	0	0	0	0.315410325251075	0	0	0	3.60663018094288e-09	0	0
HADHB	1	1	0	0	0	0.334562773392658	0	0	0	1.98040142188283e-06	0	0	0
HAMP	1	0	0	0	1	0	0	0	0.374940101922437	0	0	0	1.61562494018273e-40
HCFC1	1	1	0	0	0	0.266942585717679	0	0	0	6.79209573614355e-06	0	0	0
HEXIM1	1	0	1	0	0	0	0.253864767346838	0	0	0	8.46501308002432e-07	0	0
HIGD2A	1	1	0	0	0	0.252842990497615	0	0	0	0.00296749047927554	0	0	0
HIP1R	1	1	0	0	0	0.29464053763418	0	0	0	4.95771826988282e-06	0	0	0
HLA-DRB1	1	0	1	0	0	0	0.291749514495377	0	0	0	3.20940850735018e-09	0	0
HLA-E	1	0	1	0	0	0	0.264847208337882	0	0	0	0.000193976405037004	0	0
HLF	1	1	0	0	0	0.262969774628286	0	0	0	0.0013345576012404	0	0	0
HMGB1	1	1	0	0	0	0.305248141061229	0	0	0	1.06803221337985e-05	0	0	0
HMGCS1	1	0	0	1	0	0	0	0.269332933783584	0	0	0	1.52585656134244e-06	0
HMGN1	1	0	1	0	0	0	0.268468214104835	0	0	0	2.61640389782555e-07	0	0
HNRNPA2B1	1	1	0	0	0	0.27600567927576	0	0	0	3.32051722819246e-07	0	0	0
HNRNPH3	1	0	1	0	0	0	0.261977971309916	0	0	0	7.18380319723903e-05	0	0
HNRNPK	1	1	0	0	0	0.311216366722351	0	0	0	7.92788661130279e-08	0	0	0
HRH3	1	1	0	0	0	0.270058294228844	0	0	0	8.83255573580954e-05	0	0	0
HS3ST2	1	0	0	1	0	0	0	0.251314428280906	0	0	0	1.91942012084567e-10	0
HS6ST3	1	0	1	0	0	0	0.321247029024147	0	0	0	2.44113828046163e-12	0	0
HSPA13	1	1	0	0	0	0.280759121226079	0	0	0	8.66296616526567e-07	0	0	0
HYOU1	1	0	1	0	0	0	0.250131988743155	0	0	0	9.30756604851673e-06	0	0
IFI6	1	1	0	0	0	0.291820091353914	0	0	0	1.83485124164241e-05	0	0	0
IGFBP7	1	0	1	0	0	0	0.443220238953885	0	0	0	1.15156780965897e-15	0	0
IGSF21	1	1	0	0	0	0.256069636798084	0	0	0	0.0152224991705297	0	0	0
IGSF8	1	1	0	0	0	0.250761611795468	0	0	0	0.00426501006904304	0	0	0
IQSEC2	1	0	1	0	0	0	0.255338484020474	0	0	0	0.00015949931365768	0	0
IRF2BP2	1	0	1	0	0	0	0.255991247438093	0	0	0	5.99432538970714e-05	0	0
ISOC2	1	0	0	0	1	0	0	0	0.284311012192197	0	0	0	2.15855496176404e-18
ITGAV	1	0	1	0	0	0	0.281719102583551	0	0	0	5.43234830793395e-08	0	0
ITGB4	1	0	1	0	0	0	0.278562937051845	0	0	0	1.59765252708395e-07	0	0
JPT1	1	0	0	0	1	0	0	0	0.342651145386481	0	0	0	3.48523504920778e-21
KCNAB2	1	0	1	0	0	0	0.283645048011886	0	0	0	2.09682410453653e-08	0	0
KCNIP2	1	0	1	0	0	0	0.384574267934788	0	0	0	8.45452909928195e-16	0	0
KCNJ10	1	1	0	0	0	0.378531978304886	0	0	0	1.16738208024227e-10	0	0	0
KCNK1	1	0	1	0	0	0	0.283479308846704	0	0	0	6.47765511966862e-07	0	0
KCNMA1	1	1	0	0	0	0.256204524452436	0	0	0	0.000255313959541122	0	0	0
KCNN3	1	1	0	0	0	0.283778358971308	0	0	0	1.90139704258497e-07	0	0	0
KCTD16	1	0	1	0	0	0	0.287422800533013	0	0	0	1.11900591429593e-08	0	0
KCTD4	1	0	0	0	1	0	0	0	0.259875262113298	0	0	0	4.93996471015405e-25
KIAA1211L	1	0	1	0	0	0	0.274934749340581	0	0	0	1.58911659719578e-05	0	0
KIDINS220	1	1	0	0	0	0.252803439011463	0	0	0	0.00281124461392626	0	0	0
KIF1C	1	1	0	0	0	0.285108323258314	0	0	0	8.13890676082779e-07	0	0	0
KIF5B	1	1	0	0	0	0.265459829893098	0	0	0	0.000496751259889166	0	0	0
KLF2	1	1	0	0	0	0.292326880853351	0	0	0	8.33983636625453e-09	0	0	0
KLHL2	1	0	1	0	0	0	0.267545895521523	0	0	0	1.2204557813257e-06	0	0
KLK7	1	0	0	1	0	0	0	0.284411423583658	0	0	0	4.92109294606878e-16	0
KPNB1	1	0	1	0	0	0	0.268874953468733	0	0	0	3.42987249875193e-05	0	0
KRTCAP2	1	0	1	0	0	0	0.296603861817154	0	0	0	1.95425134119566e-08	0	0
LANCL2	1	1	0	0	0	0.254917680038475	0	0	0	9.65563065904697e-05	0	0	0
LDHA	1	0	0	0	1	0	0	0	0.469095028405286	0	0	0	2.21605555064817e-43
LGI4	1	0	1	0	0	0	0.302766760589449	0	0	0	1.47990006261359e-07	0	0
LHX2	1	1	0	0	0	0.34810448768823	0	0	0	8.52121414490873e-09	0	0	0
LIFR	1	0	1	0	0	0	0.262727877606776	0	0	0	1.2202788944515e-07	0	0
LIMK1	1	1	0	0	0	0.278371281541301	0	0	0	5.71703261117187e-05	0	0	0
LINC00205	1	0	0	0	1	0	0	0	0.302815415415981	0	0	0	1.6332428200641e-27
LINC00634	1	1	0	0	0	0.262004559421747	0	0	0	5.13718278909691e-06	0	0	0
LRP1	1	0	1	0	0	0	0.256550935205851	0	0	0	1.58358569262784e-05	0	0
LRRC4B	1	1	0	0	0	0.281479507384197	0	0	0	2.56740633890107e-05	0	0	0
LYRM9	1	1	0	0	0	0.278164455049741	0	0	0	8.35365908176899e-05	0	0	0
MAG	1	0	0	1	0	0	0	0.329514364074295	0	0	0	2.53039981554523e-19	0
MAN1A1	1	0	1	0	0	0	0.291290498460941	0	0	0	1.34874098230046e-10	0	0
MANF	1	0	0	0	1	0	0	0	0.26739856031825	0	0	0	4.95690119819735e-21
MAP1S	1	0	1	0	0	0	0.257938918081202	0	0	0	8.58831717072272e-05	0	0
MAP3K10	1	1	0	0	0	0.252656628470202	0	0	0	0.00162800476570315	0	0	0
MAP4K5	1	1	0	0	0	0.300107402327055	0	0	0	1.92119495286602e-10	0	0	0
MAP6	1	1	0	0	0	0.250869728972223	0	0	0	0.0524272529698111	0	0	0
MAPT	1	0	1	0	0	0	0.273746456467423	0	0	0	6.83115729046789e-07	0	0
MARK2	1	1	0	0	0	0.277284339320583	0	0	0	1.1443011645437e-06	0	0	0
MARK4	1	1	0	0	0	0.260752331738007	0	0	0	1.51987462971562e-05	0	0	0
MAT2A	1	1	0	0	0	0.293464421263901	0	0	0	5.39314327445383e-05	0	0	0
MED16	1	1	0	0	0	0.290822851921664	0	0	0	3.09711423434899e-07	0	0	0
MET	1	0	0	0	1	0	0	0	0.2593829821379	0	0	0	6.11275376895209e-14
MFSD10	1	1	0	0	0	0.250255666932664	0	0	0	1.15843453882956e-05	0	0	0
MGAT3	1	0	1	0	0	0	0.251959507142864	0	0	0	1.7197718838931e-05	0	0
MID1IP1	1	1	0	0	0	0.32216824852295	0	0	0	7.68112281590507e-06	0	0	0
MINK1	1	0	1	0	0	0	0.25289240174986	0	0	0	9.13707377590182e-05	0	0
MKNK2	1	0	1	0	0	0	0.276941774600348	0	0	0	2.85136394328103e-08	0	0
MLEC	1	0	1	0	0	0	0.255649746538334	0	0	0	5.55578786136507e-07	0	0
MOG	1	0	0	1	0	0	0	0.2792225967212	0	0	0	1.29321545147126e-20	0
MORF4L2	1	0	0	0	1	0	0	0	0.25227606358217	0	0	0	2.0501865002728e-11
MPDZ	1	0	1	0	0	0	0.290970818138538	0	0	0	2.97032344451425e-07	0	0
MRPL41	1	1	0	0	0	0.30680243323727	0	0	0	0.000447568177522333	0	0	0
MSMO1	1	0	0	1	0	0	0	0.254705083018767	0	0	0	6.34711841094713e-09	0
MTSS2	1	1	0	0	0	0.265808079940149	0	0	0	0.00280726906907926	0	0	0
MYBPC1	1	1	0	0	0	0.35701323257734	0	0	0	8.96112323017024e-11	0	0	0
MYDGF	1	0	0	0	1	0	0	0	0.25547032112788	0	0	0	2.58055619846499e-13
MYH9	1	0	1	0	0	0	0.257224787108536	0	0	0	4.36885199677194e-05	0	0
MYL6	1	0	1	0	0	0	0.358298424012193	0	0	0	1.40834571140686e-16	0	0
MYO10	1	1	0	0	0	0.295216242888998	0	0	0	2.16149350348902e-06	0	0	0
NACC1	1	1	0	0	0	0.259825117948815	0	0	0	4.63240199796229e-05	0	0	0
NAPB	1	0	0	1	0	0	0	0.253508447532998	0	0	0	1.49745140149154e-10	0
NCOA7	1	0	0	1	0	0	0	0.259435111780635	0	0	0	3.24002993734822e-06	0
NCS1	1	0	1	0	0	0	0.380987279717802	0	0	0	1.98472282273367e-17	0	0
NDRG1	1	0	1	0	0	0	0.268075870406727	0	0	0	2.91351370775392e-05	0	0
NDRG4	1	0	0	1	0	0	0	0.25889171201264	0	0	0	3.01453047104538e-12	0
NDUFA3	1	0	0	0	1	0	0	0	0.256880723931413	0	0	0	2.44218799733561e-13
NDUFAF8	1	0	1	0	0	0	0.340935631383181	0	0	0	1.79283888473137e-12	0	0
NDUFB7	1	1	0	0	0	0.252430999528573	0	0	0	0.000592423297002953	0	0	0
NDUFS5	1	0	0	0	1	0	0	0	0.259550076187431	0	0	0	2.1201272653479e-16
NECAB1	1	1	0	0	0	0.277851039180997	0	0	0	1.89452438283996e-05	0	0	0
NECAP1	1	0	0	1	0	0	0	0.251248744678794	0	0	0	9.87625998447176e-07	0
NECTIN1	1	0	0	1	0	0	0	0.305474798449763	0	0	0	1.51573004563944e-15	0
NEDD4L	1	0	1	0	0	0	0.267586250208182	0	0	0	3.08517812341756e-05	0	0
NEUROD2	1	0	0	1	0	0	0	0.254382370713983	0	0	0	2.40648645406399e-07	0
NEUROD6	1	0	0	0	1	0	0	0	0.29064057191634	0	0	0	4.88894765302496e-18
NFIA	1	1	0	0	0	0.308155205834328	0	0	0	2.7092840351006e-07	0	0	0
NFIX	1	1	0	0	0	0.423682194157751	0	0	0	5.73400493116235e-10	0	0	0
NKAIN4	1	1	0	0	0	0.340564447036799	0	0	0	3.87856646381374e-16	0	0	0
NKX6-2	1	0	0	1	0	0	0	0.297834443915799	0	0	0	2.24814614752824e-20	0
NLGN3	1	1	0	0	0	0.283355615359009	0	0	0	0.000328762135406695	0	0	0
NLRP1	1	1	0	0	0	0.276604496629416	0	0	0	8.28236445621533e-06	0	0	0
NORAD	1	0	0	0	1	0	0	0	0.292111560199186	0	0	0	6.82835570906168e-24
NOVA2	1	0	1	0	0	0	0.308353193268627	0	0	0	1.24366373913472e-08	0	0
NQO1	1	0	1	0	0	0	0.370727999447384	0	0	0	4.07839626609937e-14	0	0
NR1D1	1	0	1	0	0	0	0.295879317585611	0	0	0	4.34697886004248e-09	0	0
NR2F2	1	0	1	0	0	0	0.25245903973348	0	0	0	3.23268273107637e-08	0	0
NRXN3	1	0	1	0	0	0	0.275934814645575	0	0	0	4.95838493719739e-06	0	0
NT5DC3	1	1	0	0	0	0.268437986015854	0	0	0	1.40666478473372e-05	0	0	0
NUCB1	1	0	1	0	0	0	0.271537864335347	0	0	0	7.90044977481858e-05	0	0
NUCKS1	1	1	0	0	0	0.296135272683358	0	0	0	0.000134693959148247	0	0	0
NUDT3	1	1	0	0	0	0.313565142426549	0	0	0	7.41098356431302e-07	0	0	0
OAF	1	0	1	0	0	0	0.265886477275225	0	0	0	1.8102163224068e-10	0	0
OAZ1	1	0	0	0	1	0	0	0	0.313041772028657	0	0	0	4.78523820450382e-30
OPA1	1	1	0	0	0	0.255780542864634	0	0	0	0.00418449787068085	0	0	0
OPALIN	1	0	0	1	0	0	0	0.272684210293024	0	0	0	5.15054140396175e-13	0
OST4	1	0	1	0	0	0	0.351613556061097	0	0	0	2.96781679830839e-12	0	0
OXCT1	1	0	0	1	0	0	0	0.273625175055821	0	0	0	2.72360347023083e-08	0
P4HB	1	0	1	0	0	0	0.296192762119689	0	0	0	1.07432506958259e-09	0	0
PABPN1	1	1	0	0	0	0.307298972858816	0	0	0	0.000398139463553203	0	0	0
PACS2	1	1	0	0	0	0.281518605393136	0	0	0	0.00039104550677738	0	0	0
PADI2	1	1	0	0	0	0.27460469594295	0	0	0	2.08585260719052e-05	0	0	0
PAFAH1B1	1	0	0	1	0	0	0	0.26836728761784	0	0	0	1.87722068293389e-07	0
PAFAH1B3	1	1	0	0	0	0.261175557046686	0	0	0	0.000137481112682399	0	0	0
PAK1	1	0	0	0	1	0	0	0	0.502962874237443	0	0	0	1.92870652009691e-46
PAK3	1	1	0	0	0	0.296103570796372	0	0	0	1.91023651532698e-06	0	0	0
PAPOLA	1	0	1	0	0	0	0.28496929974984	0	0	0	6.76555470213687e-07	0	0
PAQR6	1	1	0	0	0	0.293552472685988	0	0	0	3.50142950629445e-07	0	0	0
PARM1	1	0	0	0	1	0	0	0	0.303399083812437	0	0	0	2.46353100360211e-17
PBXIP1	1	0	1	0	0	0	0.293570106309369	0	0	0	2.96703139974606e-07	0	0
PCDH9	1	0	1	0	0	0	0.290306753411679	0	0	0	2.18137747280236e-06	0	0
PCM1	1	1	0	0	0	0.265808079940149	0	0	0	7.48276102378812e-06	0	0	0
PCYT1B	1	0	1	0	0	0	0.268648021711181	0	0	0	3.12507383646374e-09	0	0
PDE1A	1	0	0	1	0	0	0	0.304801111227886	0	0	0	7.43822523619058e-11	0
PDIA3	1	0	1	0	0	0	0.305802340741632	0	0	0	1.39470395710115e-07	0	0
PDLIM5	1	1	0	0	0	0.250255666932664	0	0	0	6.42903944992135e-06	0	0	0
PEX5L	1	1	0	0	0	0.255078273592595	0	0	0	0.00059805441440134	0	0	0
PFKFB3	1	0	0	0	1	0	0	0	0.266767943869794	0	0	0	2.47934537751198e-17
PFKP	1	0	0	1	0	0	0	0.255566840181017	0	0	0	2.86879529466472e-08	0
PHACTR3	1	0	1	0	0	0	0.263571843950424	0	0	0	3.30165704424896e-06	0	0
PHLPP1	1	1	0	0	0	0.252777736365374	0	0	0	6.69581901978765e-07	0	0	0
PHYHIP	1	0	1	0	0	0	0.316647453815511	0	0	0	2.57681349512708e-21	0	0
PI4KB	1	0	1	0	0	0	0.264776076993826	0	0	0	2.15585607706909e-06	0	0
PID1	1	0	0	1	0	0	0	0.255797382417376	0	0	0	2.79274315433558e-10	0
PIK3C2A	1	1	0	0	0	0.251126367901908	0	0	0	3.85523644840419e-05	0	0	0
PIK3R1	1	0	1	0	0	0	0.267090328940227	0	0	0	3.18441531092243e-05	0	0
PIK3R2	1	1	0	0	0	0.284307809678579	0	0	0	7.25981517970553e-05	0	0	0
PITPNC1	1	0	1	0	0	0	0.253167732681927	0	0	0	4.126795645981e-07	0	0
PJA1	1	1	0	0	0	0.27331144323259	0	0	0	4.65625471544872e-06	0	0	0
PKIA	1	1	0	0	0	0.304103107982275	0	0	0	0.000410443258572168	0	0	0
PKP4	1	1	0	0	0	0.251001657269386	0	0	0	0.0487847128963116	0	0	0
PLEC	1	1	0	0	0	0.355673784618098	0	0	0	8.17915748089867e-10	0	0	0
PLEKHA2	1	0	1	0	0	0	0.298143982250951	0	0	0	1.55026514999582e-09	0	0
PLPPR3	1	1	0	0	0	0.256091448396766	0	0	0	4.33457429488499e-06	0	0	0
PLXNB1	1	1	0	0	0	0.391787882800711	0	0	0	1.20566398721516e-10	0	0	0
PNMA6F	1	1	0	0	0	0.257860266317883	0	0	0	6.97970589168605e-07	0	0	0
PNMA8A	1	0	0	1	0	0	0	0.296765232973785	0	0	0	1.65460365911654e-10	0
PNPLA6	1	1	0	0	0	0.261676684594132	0	0	0	9.97583716445529e-05	0	0	0
PNRC2	1	0	1	0	0	0	0.272680036389613	0	0	0	2.4671564639229e-07	0	0
PODXL2	1	1	0	0	0	0.27586824278939	0	0	0	0.00109822249639373	0	0	0
POLR2J	1	0	1	0	0	0	0.260883879297057	0	0	0	2.84792772672988e-07	0	0
PPIA	1	0	0	0	1	0	0	0	0.265534025373835	0	0	0	2.29527908410726e-29
PPIB	1	0	1	0	0	0	0.327663477088941	0	0	0	5.20343235243735e-11	0	0
PPID	1	0	0	0	1	0	0	0	0.292413104500939	0	0	0	2.3315889728684e-24
PPP1CB	1	1	0	0	0	0.268604805600861	0	0	0	0.000190937030753061	0	0	0
PPP1R1A	1	1	0	0	0	0.261175557046686	0	0	0	6.69439974582503e-05	0	0	0
PPP2R1A	1	1	0	0	0	0.263263581357422	0	0	0	2.50759525031284e-08	0	0	0
PPT1	1	0	1	0	0	0	0.274759341516942	0	0	0	7.79170094669476e-07	0	0
PREX1	1	1	0	0	0	0.335673418087016	0	0	0	1.93801552850581e-08	0	0	0
PRKACA	1	1	0	0	0	0.264115485058641	0	0	0	9.19282651688952e-05	0	0	0
PRKCE	1	0	0	1	0	0	0	0.278166638991349	0	0	0	6.55263558190344e-07	0
PRNP	1	0	0	0	1	0	0	0	0.276250908399404	0	0	0	1.06257119755082e-31
PRR18	1	0	0	1	0	0	0	0.258605674335301	0	0	0	1.87098132491836e-19	0
PRRC2B	1	1	0	0	0	0.34750410014734	0	0	0	1.27332843639065e-06	0	0	0
PRRC2C	1	0	1	0	0	0	0.250974591924605	0	0	0	2.28919060427155e-06	0	0
PRSS3	1	0	0	0	1	0	0	0	0.2526131763271	0	0	0	2.94395490665602e-12
PSAT1	1	1	0	0	0	0.394276332805905	0	0	0	3.16480806871415e-12	0	0	0
PSIP1	1	1	0	0	0	0.250255666932664	0	0	0	0.00609296883336049	0	0	0
PTGDS	1	1	0	0	0	0.469266980961963	0	0	0	1.37915303344849e-34	0	0	0
PTP4A2	1	1	0	0	0	0.269982682720736	0	0	0	0.00400900807396432	0	0	0
PTPA	1	1	0	0	0	0.317914315406479	0	0	0	1.17186856870426e-07	0	0	0
PTPRA	1	1	0	0	0	0.276822694317386	0	0	0	0.000507150923153259	0	0	0
PTPRN	1	1	0	0	0	0.317431245684903	0	0	0	2.51521818685857e-07	0	0	0
PUM1	1	1	0	0	0	0.263917893102567	0	0	0	0.00383771475660421	0	0	0
RAB10	1	0	1	0	0	0	0.272897199516167	0	0	0	1.86294489400238e-06	0	0
RAB21	1	1	0	0	0	0.281276360590121	0	0	0	9.09819609301263e-05	0	0	0
RAB27B	1	0	0	1	0	0	0	0.271511264452466	0	0	0	1.54479355265588e-10	0
RAB31	1	1	0	0	0	0.347857454729248	0	0	0	2.12668436195933e-10	0	0	0
RAB40B	1	0	1	0	0	0	0.315240957090384	0	0	0	1.54580024779635e-08	0	0
RAMP1	1	0	1	0	0	0	0.414887790543342	0	0	0	5.56196426407875e-17	0	0
RAP1GAP	1	1	0	0	0	0.361846732341126	0	0	0	2.01404913248262e-09	0	0	0
RAP1GAP2	1	0	0	1	0	0	0	0.331616822651541	0	0	0	1.21264231225571e-11	0
RBM17	1	1	0	0	0	0.255193948573247	0	0	0	4.73636275476416e-05	0	0	0
RBM4	1	0	1	0	0	0	0.291991877576322	0	0	0	3.69888964812731e-08	0	0
RBX1	1	1	0	0	0	0.266969147906405	0	0	0	0.00510832275881688	0	0	0
RDX	1	1	0	0	0	0.274948279523036	0	0	0	1.38850666965113e-06	0	0	0
RFK	1	0	0	1	0	0	0	0.278719284285678	0	0	0	8.72684333349492e-09	0
RFX3	1	0	1	0	0	0	0.269521303646081	0	0	0	2.98053570151636e-10	0	0
RGMB	1	1	0	0	0	0.281314063952637	0	0	0	0.000220048312161008	0	0	0
RGS14	1	0	1	0	0	0	0.320238121946239	0	0	0	6.90264782081715e-13	0	0
RGS4	1	0	0	0	1	0	0	0	0.390828099833166	0	0	0	2.63524091692904e-31
RHOA	1	1	0	0	0	0.282424949866056	0	0	0	0.000122351718038203	0	0	0
RHOBTB3	1	1	0	0	0	0.339170718588195	0	0	0	4.97891004849116e-09	0	0	0
RHOC	1	0	1	0	0	0	0.3930505526284	0	0	0	1.38964528364456e-13	0	0
RING1	1	1	0	0	0	0.265664292285509	0	0	0	4.06442938552259e-05	0	0	0
RIPOR1	1	1	0	0	0	0.296346774132931	0	0	0	8.67063944942789e-06	0	0	0
RMND5A	1	0	1	0	0	0	0.26568398956843	0	0	0	6.86248520117723e-06	0	0
RNASE1	1	0	0	1	0	0	0	0.309736722401041	0	0	0	3.20565431224121e-10	0
RNF150	1	0	1	0	0	0	0.292140444914742	0	0	0	6.23872794278428e-14	0	0
RPL10	1	0	1	0	0	0	0.277581124741535	0	0	0	6.54553362182039e-13	0	0
RPL10A	1	0	1	0	0	0	0.25150500421419	0	0	0	2.33671567829214e-05	0	0
RPL12	1	0	1	0	0	0	0.382448020703969	0	0	0	2.82676600952235e-16	0	0
RPL18	1	0	1	0	0	0	0.288223414335983	0	0	0	4.66472826853564e-12	0	0
RPL18A	1	0	1	0	0	0	0.28660156554828	0	0	0	7.5664425406678e-13	0	0
RPL19	1	0	1	0	0	0	0.278772163959188	0	0	0	2.00714635099856e-10	0	0
RPL21	1	0	1	0	0	0	0.284826420154232	0	0	0	3.43551279803853e-12	0	0
RPL22	1	0	1	0	0	0	0.289525715751077	0	0	0	1.44247630518974e-11	0	0
RPL28	1	0	1	0	0	0	0.301569941003819	0	0	0	1.70630787065768e-24	0	0
RPL29	1	0	1	0	0	0	0.383930619344685	0	0	0	2.26701155059691e-23	0	0
RPL35	1	0	1	0	0	0	0.318502419276975	0	0	0	1.7103828364177e-16	0	0
RPL36A	1	0	1	0	0	0	0.284222643732343	0	0	0	1.25966788408669e-09	0	0
RPL4	1	0	0	0	1	0	0	0	0.258850055766845	0	0	0	3.44640175431832e-21
RPL8	1	0	1	0	0	0	0.271321869288245	0	0	0	5.32916168288868e-10	0	0
RPLP1	1	0	1	0	0	0	0.357687176110644	0	0	0	7.15995205477659e-30	0	0
RPRD1A	1	1	0	0	0	0.254995012296561	0	0	0	0.00651356169520055	0	0	0
RPS16	1	0	1	0	0	0	0.36002225808382	0	0	0	1.1052831815163e-13	0	0
RPS17	1	0	1	0	0	0	0.332050333876713	0	0	0	1.13281083330721e-14	0	0
RPS23	1	0	1	0	0	0	0.270882489674888	0	0	0	4.64321982274636e-12	0	0
RPS24	1	0	1	0	0	0	0.286906994049597	0	0	0	7.45103796394695e-14	0	0
RPS28	1	0	1	0	0	0	0.390071555380187	0	0	0	3.94041506086161e-31	0	0
RPS5	1	0	1	0	0	0	0.304338725350987	0	0	0	1.31287934627323e-09	0	0
RPS6KA2	1	1	0	0	0	0.294091981745842	0	0	0	9.83456493594699e-08	0	0	0
RPS9	1	0	1	0	0	0	0.315490411506982	0	0	0	6.34634211166209e-10	0	0
RPSA	1	0	1	0	0	0	0.257339853008635	0	0	0	1.92183578150336e-08	0	0
RTN4R	1	0	1	0	0	0	0.314061015950535	0	0	0	4.61665540399476e-08	0	0
RUNDC3A	1	0	1	0	0	0	0.304057660040999	0	0	0	3.60451201899961e-15	0	0
RXRA	1	1	0	0	0	0.261703052773015	0	0	0	7.82195784273736e-05	0	0	0
S100A1	1	0	0	0	1	0	0	0	0.261377584565046	0	0	0	4.47391764340045e-11
S100A6	1	0	1	0	0	0	0.286670106194004	0	0	0	1.69011960164384e-06	0	0
S100A8	1	0	0	0	1	0	0	0	0.291284749123804	0	0	0	4.00126928521846e-29
S1PR1	1	1	0	0	0	0.299045831102096	0	0	0	6.69202925467497e-08	0	0	0
SAMD4B	1	0	1	0	0	0	0.250974591924605	0	0	0	7.22315765319171e-06	0	0
SARAF	1	0	0	1	0	0	0	0.269309521981694	0	0	0	1.30771916314652e-13	0
SASH1	1	1	0	0	0	0.37688831786603	0	0	0	8.71622325057364e-12	0	0	0
SDC4	1	1	0	0	0	0.401868567107452	0	0	0	1.62615108568617e-14	0	0	0
SDF4	1	0	1	0	0	0	0.277693371779661	0	0	0	2.96323106526162e-06	0	0
SELENOW	1	0	0	0	1	0	0	0	0.278826155546947	0	0	0	7.08907420597742e-30
SEMA4A	1	0	0	1	0	0	0	0.254017727321322	0	0	0	7.45287918575323e-16	0
SEPTIN4	1	0	0	1	0	0	0	0.281080791528267	0	0	0	6.82335247024296e-06	0
SERINC1	1	0	0	1	0	0	0	0.339076456927534	0	0	0	9.12954439267312e-24	0
SERINC3	1	0	1	0	0	0	0.269031055342184	0	0	0	1.63321038521609e-07	0	0
SERP1	1	0	1	0	0	0	0.300910235743841	0	0	0	2.66059762883753e-07	0	0
SERPINA1	1	0	0	0	1	0	0	0	0.279672481826424	0	0	0	1.04277408644319e-33
SERPING1	1	0	1	0	0	0	0.275188151262723	0	0	0	6.15950252084447e-08	0	0
SEZ6L	1	1	0	0	0	0.254124143710584	0	0	0	0.000139136080897229	0	0	0
SFPQ	1	0	1	0	0	0	0.364389862519346	0	0	0	1.32436181412454e-11	0	0
SGSM2	1	1	0	0	0	0.267817093862611	0	0	0	6.65806008225111e-06	0	0	0
SH3GL3	1	1	0	0	0	0.345427256202501	0	0	0	1.32566046686161e-07	0	0	0
SH3GLB2	1	1	0	0	0	0.315663591341789	0	0	0	6.38072556036354e-07	0	0	0
SHISA4	1	0	1	0	0	0	0.266679562905297	0	0	0	1.96625826742124e-05	0	0
SHISA9	1	0	0	0	1	0	0	0	0.253068181244972	0	0	0	2.96468540396517e-17
SHTN1	1	1	0	0	0	0.278770837240685	0	0	0	0.000185269473895451	0	0	0
SIK3	1	1	0	0	0	0.287349791338905	0	0	0	1.27434209778167e-05	0	0	0
SLC25A18	1	1	0	0	0	0.260360688790859	0	0	0	0.000157304946163804	0	0	0
SLC39A12	1	1	0	0	0	0.310670930431575	0	0	0	9.45843553256336e-07	0	0	0
SLC4A4	1	1	0	0	0	0.43211755927357	0	0	0	7.81883807354389e-20	0	0	0
SLC9A3R2	1	1	0	0	0	0.280108630082345	0	0	0	2.58692093014973e-05	0	0	0
SLITRK4	1	0	1	0	0	0	0.270688230206186	0	0	0	7.61102407735867e-07	0	0
SMIM10L2B	1	1	0	0	0	0.251915418351029	0	0	0	0.000336826342430637	0	0	0
SNAP91	1	0	0	1	0	0	0	0.276832717420639	0	0	0	2.73390243914414e-11	0
SNHG7	1	0	0	0	1	0	0	0	0.304207142736159	0	0	0	4.25805516507628e-21
SNHG8	1	0	1	0	0	0	0.258561693902043	0	0	0	4.03980635560705e-05	0	0
SNTA1	1	1	0	0	0	0.304859800967516	0	0	0	1.03568533715246e-05	0	0	0
SOD1	1	0	0	0	1	0	0	0	0.28827808820311	0	0	0	2.67297544514959e-28
SOWAHA	1	0	1	0	0	0	0.47639221365727	0	0	0	2.03745085801048e-22	0	0
SOX2-OT	1	1	0	0	0	0.298141262971669	0	0	0	6.96775715462925e-05	0	0	0
SOX9	1	0	1	0	0	0	0.26161491657714	0	0	0	4.24766679127225e-06	0	0
SPG21	1	0	1	0	0	0	0.257262109283925	0	0	0	1.39610846617716e-06	0	0
SPOCK1	1	1	0	0	0	0.334914655164015	0	0	0	5.49446564958914e-09	0	0	0
SPOCK2	1	1	0	0	0	0.290843029823499	0	0	0	6.94086903917515e-07	0	0	0
SPTBN1	1	1	0	0	0	0.404630235711938	0	0	0	1.43475378409869e-20	0	0	0
SRCIN1	1	1	0	0	0	0.298616738626085	0	0	0	1.93559268122625e-06	0	0	0
SREBF1	1	1	0	0	0	0.448858109330756	0	0	0	5.97593510610083e-18	0	0	0
SRI	1	0	1	0	0	0	0.268870528601866	0	0	0	3.0295511353956e-05	0	0
SRM	1	0	1	0	0	0	0.280835718011171	0	0	0	1.00363474567645e-08	0	0
SRSF1	1	1	0	0	0	0.261870199353357	0	0	0	2.27757173525496e-06	0	0	0
SRSF2	1	1	0	0	0	0.304825211458511	0	0	0	1.18004203101653e-05	0	0	0
SRSF6	1	1	0	0	0	0.277066924383321	0	0	0	0.00017149227524129	0	0	0
SSBP3	1	1	0	0	0	0.297522214758596	0	0	0	3.90452160761445e-05	0	0	0
SSR4	1	0	1	0	0	0	0.29749719353427	0	0	0	8.86384988302369e-08	0	0
STARD7	1	1	0	0	0	0.255379503932533	0	0	0	0.00485539583101055	0	0	0
STAU1	1	1	0	0	0	0.258839410624055	0	0	0	0.000134334439997225	0	0	0
STIM1	1	0	1	0	0	0	0.256746613721727	0	0	0	2.27061877837723e-06	0	0
STIP1	1	0	0	0	1	0	0	0	0.265157506085261	0	0	0	4.04663062344499e-12
STMN2	1	0	0	1	0	0	0	0.500478654697282	0	0	0	9.88945857256972e-37	0
STOM	1	0	1	0	0	0	0.346965087493113	0	0	0	1.25960115944411e-10	0	0
STON2	1	0	1	0	0	0	0.250824157089839	0	0	0	5.99842319856033e-07	0	0
SUMO3	1	1	0	0	0	0.303409474389869	0	0	0	0.000299551232640658	0	0	0
SUN2	1	1	0	0	0	0.271309076130496	0	0	0	0.00405832022590943	0	0	0
SURF1	1	1	0	0	0	0.268120219698528	0	0	0	8.05132100294535e-05	0	0	0
SURF4	1	0	1	0	0	0	0.286636375399472	0	0	0	9.2277827761416e-10	0	0
SYNGAP1	1	1	0	0	0	0.302835508778285	0	0	0	4.37762541355032e-09	0	0	0
SYNJ1	1	0	0	1	0	0	0	0.259864468440842	0	0	0	7.62798562966868e-08	0
SYNPR	1	0	1	0	0	0	0.332342843279202	0	0	0	8.2788786581314e-10	0	0
SYT1	1	0	0	1	0	0	0	0.482845853966141	0	0	0	6.16887331829862e-54	0
TAF10	1	0	1	0	0	0	0.258963865634791	0	0	0	0.000239819435104376	0	0
TAFA5	1	0	1	0	0	0	0.283579203956922	0	0	0	1.70629180808292e-06	0	0
TBCB	1	1	0	0	0	0.274034858698778	0	0	0	0.000331772502720799	0	0	0
TBL1XR1	1	0	1	0	0	0	0.278791512213251	0	0	0	5.32855940480717e-08	0	0
TCEAL7	1	0	0	1	0	0	0	0.264272009408348	0	0	0	4.04870526311336e-09	0
TEF	1	0	1	0	0	0	0.275683363380274	0	0	0	6.05181310869605e-05	0	0
TIMP3	1	1	0	0	0	0.37025845932736	0	0	0	1.30255181512735e-11	0	0	0
TJP1	1	1	0	0	0	0.262802882984753	0	0	0	5.21704201568743e-06	0	0	0
TLE1	1	0	1	0	0	0	0.280908119511819	0	0	0	5.55780150840133e-07	0	0
TM2D3	1	0	0	1	0	0	0	0.291173303549016	0	0	0	8.40740200527012e-10	0
TMEM151A	1	0	0	0	1	0	0	0	0.251413118659661	0	0	0	1.17586071351904e-13
TMEM176A	1	0	1	0	0	0	0.288438052832296	0	0	0	8.15294168709365e-11	0	0
TMEM176B	1	0	1	0	0	0	0.324407528572666	0	0	0	4.33065684853151e-12	0	0
TMEM222	1	1	0	0	0	0.250255666932664	0	0	0	0.000264484117488441	0	0	0
TMEM271	1	1	0	0	0	0.299045831102096	0	0	0	4.38688158319277e-06	0	0	0
TMEM9	1	0	1	0	0	0	0.26061761567884	0	0	0	3.68317182349711e-05	0	0
TMEM94	1	0	1	0	0	0	0.292388807276703	0	0	0	1.78537181075823e-08	0	0
TNK2	1	1	0	0	0	0.264115485058641	0	0	0	8.23010253676375e-05	0	0	0
TOLLIP	1	0	0	0	1	0	0	0	0.343956023929471	0	0	0	5.51496532211285e-22
TP53INP2	1	0	1	0	0	0	0.278907125832664	0	0	0	6.32976163814862e-10	0	0
TPD52L1	1	1	0	0	0	0.311757866690458	0	0	0	4.23360774129289e-06	0	0	0
TPI1	1	0	0	0	1	0	0	0	0.391514308570587	0	0	0	2.9066510196548e-50
TPP1	1	0	1	0	0	0	0.378453819617541	0	0	0	1.47812391630866e-12	0	0
TPPP3	1	1	0	0	0	0.396465858388515	0	0	0	7.06616073121726e-15	0	0	0
TRIM8	1	1	0	0	0	0.257176109777238	0	0	0	0.00038302762222536	0	0	0
TSPAN13	1	0	0	0	1	0	0	0	0.254700392576247	0	0	0	4.62610701893951e-13
TSPAN14	1	0	1	0	0	0	0.260223127904318	0	0	0	2.52233610212667e-05	0	0
TSPO	1	0	1	0	0	0	0.299029643454889	0	0	0	2.333949575826e-09	0	0
TUBA4A	1	0	0	1	0	0	0	0.267018562573124	0	0	0	4.2330066279215e-08	0
TUBB3	1	0	0	1	0	0	0	0.397723195714451	0	0	0	2.28996617998643e-20	0
TUSC3	1	0	0	1	0	0	0	0.294384181723646	0	0	0	7.2569787487327e-11	0
TYRO3	1	0	1	0	0	0	0.349437276638502	0	0	0	2.37655206574887e-10	0	0
UBE2QL1	1	0	0	1	0	0	0	0.299990391570867	0	0	0	4.44854837451402e-12	0
UBE3A	1	1	0	0	0	0.308465053018588	0	0	0	8.0223095341215e-07	0	0	0
UBTF	1	0	1	0	0	0	0.291440777228336	0	0	0	3.50401440432108e-09	0	0
UFM1	1	1	0	0	0	0.257757577584459	0	0	0	0.000111121050446387	0	0	0
UGT8	1	0	0	1	0	0	0	0.282659323821317	0	0	0	5.3453391267683e-27	0
UNC13A	1	0	1	0	0	0	0.288528523551509	0	0	0	3.75343190044443e-07	0	0
UPK3BL1	1	1	0	0	0	0.289616740813244	0	0	0	9.41592156477798e-09	0	0	0
USP22	1	1	0	0	0	0.377007372571808	0	0	0	6.18335081411331e-14	0	0	0
USP7	1	1	0	0	0	0.28623838481217	0	0	0	2.61494819162945e-05	0	0	0
VAMP2	1	0	0	1	0	0	0	0.287741843528575	0	0	0	7.22469910536541e-16	0
VSTM2L	1	0	1	0	0	0	0.292775017609029	0	0	0	7.8912958767646e-07	0	0
WASF3	1	1	0	0	0	0.392319106296102	0	0	0	2.08104978389116e-10	0	0	0
WBP1	1	0	1	0	0	0	0.257321987730696	0	0	0	6.49519636600551e-07	0	0
WDR1	1	1	0	0	0	0.258241190311592	0	0	0	6.5632940737455e-05	0	0	0
WDR13	1	1	0	0	0	0.27788760559475	0	0	0	6.44909179031438e-05	0	0	0
WIPF2	1	1	0	0	0	0.257112836658801	0	0	0	0.000419062832499748	0	0	0
WLS	1	0	1	0	0	0	0.356353368336875	0	0	0	4.96629708306864e-13	0	0
WNK1	1	1	0	0	0	0.312661233120094	0	0	0	1.31196706935844e-05	0	0	0
WSB1	1	0	0	1	0	0	0	0.289335175574934	0	0	0	3.30171102336493e-10	0
XKR4	1	0	0	1	0	0	0	0.254542155537428	0	0	0	1.32863266916571e-21	0
YBX1	1	0	1	0	0	0	0.293602489729062	0	0	0	8.58886102695424e-09	0	0
YJEFN3	1	0	1	0	0	0	0.342661123527964	0	0	0	6.37404802077818e-12	0	0
YKT6	1	1	0	0	0	0.295340407686885	0	0	0	9.6555824105862e-07	0	0	0
YWHAQ	1	0	0	0	1	0	0	0	0.281434266227609	0	0	0	1.10027815843547e-14
ZBTB44	1	1	0	0	0	0.275256969138081	0	0	0	1.20638276898777e-05	0	0	0
ZDHHC23	1	0	0	0	1	0	0	0	0.258404463125481	0	0	0	5.04490866725202e-23
ZEB2	1	1	0	0	0	0.320513560726202	0	0	0	3.67016179243743e-08	0	0	0
ZFAND5	1	1	0	0	0	0.259704556130597	0	0	0	0.00175472019717898	0	0	0
ZFP36L1	1	0	1	0	0	0	0.335478924387795	0	0	0	3.77498412446181e-11	0	0
ZFR	1	1	0	0	0	0.275557849794882	0	0	0	0.000595408058928961	0	0	0
ZMAT2	1	0	1	0	0	0	0.273507961154893	0	0	0	2.0215909858422e-05	0	0
ZMIZ2	1	0	1	0	0	0	0.255546853529823	0	0	0	0.000176636904366347	0	0
ZMYM3	1	1	0	0	0	0.311451227959584	0	0	0	3.58164249230055e-08	0	0	0
ZNF358	1	1	0	0	0	0.251584570782718	0	0	0	0.0264025188115644	0	0	0

## Sheet: Layer 4_AD_down_DEG
This spreadsheet is derived from DEGs analysis by comparing gene expression between AD and CT from Layer 4. Column A indicates gene ID. Column B indicates the number of overlapping genes from four comparisons. Column G to column J indicates the log fold change of four comparisons.
Gene	contribution summary					logFC (e as base, cutoff >= 0.25)				adjusted p-value (Wilcoxon test, cutoff <= 0.05)
ID	overlap	AD1 vs CT1	AD2 vs CT2	AD1 vs CT2	AD2 vs CT2	Layer 4_down_logFC_AD1_CT1	Layer 4_down_logFC_AD2_CT1	Layer 4_down_logFC_AD1_CT2	Layer 4_down_logFC_AD2_CT2	Layer 4down_Adj.pval_AD1_CT1	Layer 4down_Adj.pval_AD2_CT1	Layer 4down_Adj.pval_AD1_CT2	Layer 4down_Adj.pval_AD2_CT2
CHGA	4	1	1	1	1	-0.391011748647955	-0.641794876527772	-0.444181592434273	-0.69496472031409	8.17947624405907e-18	3.65065815200703e-47	5.59082427739433e-25	4.1093204388406e-73
HAPLN4	4	1	1	1	1	-0.279988042690428	-0.283024952099862	-0.366541439365206	-0.36957834877464	4.77305967151829e-07	2.0492118225396e-09	1.41455265567893e-15	3.17256613673165e-23
NEFH	4	1	1	1	1	-0.505023294734287	-0.594778480941124	-0.337034016855082	-0.426789203061918	6.2727243194557e-13	8.23801101974147e-27	4.69302174903872e-10	1.28167407536331e-27
SCN1B	4	1	1	1	1	-0.691250039875148	-0.558864065202174	-0.6016055976065	-0.469219622933527	1.28828157144396e-36	1.79918363843811e-34	8.43910877230605e-34	7.30228475782753e-32
CARTPT	3	1	1	1	0	-0.458395700163246	-0.410507384844959	-0.257867444698487	0	6.69627295542139e-21	7.65592737629626e-24	9.10478670774449e-12	0
VAMP1	3	1	1	1	0	-0.438636188057143	-0.330576904319288	-0.311481012571896	0	1.04514818167494e-17	1.90939306414262e-12	9.29400352198348e-11	0
AL121820.2	2	0	0	1	1	0	0	-0.4011845216745	-0.392501988676577	0	0	8.67157456902287e-20	1.63364320217802e-29
CAMK2G	2	0	1	0	1	0	-0.302570779075586	0	-0.372355398632311	0	4.26935147653669e-11	0	1.91610403550268e-24
CCK	2	1	0	1	0	-0.382637343260686	0	-0.318340146763655	0	4.66226919780145e-18	0	2.64209075113068e-18	0
COX7A1	2	1	0	1	0	-0.526501295391939	0	-0.321298798060478	0	2.24725116095165e-23	0	5.84418639790886e-08	0
CPLX1	2	1	0	1	0	-0.366062914051508	0	-0.290720610656777	0	1.73323187305626e-13	0	3.50540279593455e-09	0
DEPP1	2	1	1	0	0	-0.494496285980284	-0.324564955044235	0	0	2.92585508917429e-21	5.67980696782207e-11	0	0
GADD45B	2	1	1	0	0	-0.394431328012238	-0.334972207493238	0	0	1.01742837505144e-13	2.18581190094306e-12	0	0
GJB6	2	0	0	1	1	0	0	-0.337587940989498	-0.336238580520695	0	0	1.09802549935877e-09	3.43063743545027e-14
HBA1	2	0	0	1	1	0	0	-0.313107554257805	-0.415792097418892	0	0	0.611619829074515	2.38833167876498e-12
HBA2	2	0	0	1	1	0	0	-0.469562848929068	-0.595534841465465	0	0	0.00022523140107848	4.57300319274843e-23
HBB	2	0	0	1	1	0	0	-0.541597282432744	-0.987553441481676	0	0	1	5.74232575787965e-40
INA	2	1	0	1	0	-0.253941430002419	0	-0.254122006985625	0	5.17258790849717e-06	0	1.21263485346417e-06	0
LINC00632	2	0	0	1	1	0	0	-0.26658836585917	-0.41397058167564	0	0	0.00178002783607706	3.17504372004955e-18
MDH1	2	1	1	0	0	-0.342597000005249	-0.334298069739097	0	0	1.16630488184661e-16	1.04568574961134e-20	0	0
MFGE8	2	0	0	1	1	0	0	-0.271089001932076	-0.266433565718355	0	0	6.50289035679522e-10	4.31476619926531e-15
NAT8L	2	0	0	1	1	0	0	-0.381170674517784	-0.35231794184164	0	0	1.03957237496704e-20	4.34987984197453e-26
NDUFA4	2	1	1	0	0	-0.40876497922611	-0.341847287370864	0	0	2.49756819061808e-36	2.7579992687645e-34	0	0
NEFM	2	1	0	1	0	-0.408364556018724	0	-0.300637441928277	0	1.36859012644141e-11	0	6.18786277332919e-08	0
PCP4	2	1	1	0	0	-0.343205695740924	-0.431700002239263	0	0	0.0493380513841532	4.41838866374568e-09	0	0
PVALB	2	1	1	0	0	-0.297474513768778	-0.283528688152828	0	0	8.66478571078373e-10	2.81808259803197e-12	0	0
RCAN2	2	1	0	1	0	-0.257642921500804	0	-0.31544709352042	0	0.00105639619724818	0	6.27818695247524e-10	0
RPS26	2	0	0	1	1	0	0	-0.506849196780456	-0.354734612057355	0	0	6.28228770990138e-33	7.64381786914529e-24
SNAP25	2	1	1	0	0	-0.265103242981326	-0.300826876893863	0	0	1.24362636071055e-15	1.51704835664676e-24	0	0
SNHG6	2	0	0	1	1	0	0	-0.332639887689525	-0.312775032812274	0	0	8.09599730183425e-11	9.81683033101305e-15
TBR1	2	0	1	0	1	0	-0.265224155303022	0	-0.316387935977899	0	1.43121462824264e-09	0	1.50691410793362e-15
TESPA1	2	1	0	1	0	-0.263586550372752	0	-0.50717987596176	0	0.000237684014937922	0	1.48740186477517e-26	0
TSC22D3	2	0	0	1	1	0	0	-0.388444531072573	-0.339192254066422	0	0	4.10956808388023e-18	1.37589504654564e-19
VWF	2	0	0	1	1	0	0	-0.404096950085595	-0.354652698557964	0	0	3.44105178985876e-16	7.84814788045699e-18
WIF1	2	0	0	1	1	0	0	-0.351952056982301	-0.324255221373594	0	0	1.17504375288991e-13	1.47455146809544e-18
ACBD7	1	0	0	0	1	0	0	0	-0.275089590770295	0	0	0	3.60949485637796e-12
ALDH1L1	1	0	0	1	0	0	0	-0.313389191983028	0	0	0	3.44759384234184e-11	0
ANGPTL4	1	1	0	0	0	-0.255938787457759	0	0	0	6.98243073611423e-05	0	0	0
ATP1A1	1	1	0	0	0	-0.45873543177854	0	0	0	2.21785594858708e-24	0	0	0
ATP5F1A	1	0	1	0	0	0	-0.275954911693038	0	0	0	1.01763288643849e-12	0	0
ATP5F1B	1	0	1	0	0	0	-0.305799955040895	0	0	0	2.24554301059331e-20	0	0
CABP1	1	1	0	0	0	-0.359566886368635	0	0	0	2.82489613443021e-16	0	0	0
CEBPD	1	0	0	1	0	0	0	-0.278376443705841	0	0	0	4.7965372716514e-06	0
CLDN5	1	0	0	1	0	0	0	-0.356092023490865	0	0	0	2.04313239132277e-09	0
COPS9	1	0	0	1	0	0	0	-0.339775176365551	0	0	0	2.27393019608838e-19	0
GOT1	1	0	1	0	0	0	-0.313330301595191	0	0	0	2.92685504838549e-12	0	0
GPX3	1	0	0	1	0	0	0	-0.252996514463891	0	0	0	1.1606637717982e-06	0
GSTM5	1	0	0	0	1	0	0	0	-0.281354115359801	0	0	0	1.62067499967633e-14
HINT1	1	1	0	0	0	-0.294517091515671	0	0	0	4.96025262702952e-12	0	0	0
KCNS1	1	0	0	1	0	0	0	-0.277255910141197	0	0	0	3.65944356442927e-09	0
LRATD1	1	0	0	1	0	0	0	-0.344584855605436	0	0	0	1.4520346785763e-13	0
MOAP1	1	0	1	0	0	0	-0.259334596065667	0	0	0	2.48557465858033e-09	0	0
MT1H	1	0	0	1	0	0	0	-0.260005144618368	0	0	0	1.33465347933838e-09	0
MT1X	1	0	0	0	1	0	0	0	-0.335079801956688	0	0	0	5.69762415547365e-18
NSG1	1	1	0	0	0	-0.260085578039647	0	0	0	0.000175970742839164	0	0	0
OIP5-AS1	1	0	0	1	0	0	0	-0.259239301195908	0	0	0	4.50978323337646e-07	0
PDZD2	1	0	0	1	0	0	0	-0.343932300084086	0	0	0	1.62802589959423e-15	0
PRKCA	1	0	0	1	0	0	0	-0.263634912668947	0	0	0	5.13574220755232e-07	0
PRXL2A	1	0	0	0	1	0	0	0	-0.257906080871984	0	0	0	2.66315404740399e-09
RBM3	1	0	0	0	1	0	0	0	-0.322476898769542	0	0	0	3.19813546029274e-19
RORB	1	1	0	0	0	-0.33706206478384	0	0	0	5.50238940586487e-10	0	0	0
RPH3A	1	0	0	1	0	0	0	-0.303668419074233	0	0	0	2.97454708943079e-10	0
SCG3	1	0	0	1	0	0	0	-0.346135500668062	0	0	0	7.60067218948887e-13	0
SCN1A	1	0	0	0	1	0	0	0	-0.261507356463182	0	0	0	1.17270149139737e-11
SLC24A2	1	0	1	0	0	0	-0.275166571664359	0	0	0	6.47231032170375e-11	0	0
SRP14	1	0	0	1	0	0	0	-0.33052089061605	0	0	0	9.80909093140424e-19	0
TSC22D1	1	1	0	0	0	-0.330592566805103	0	0	0	1.47025724140023e-23	0	0	0
UQCRH	1	1	0	0	0	-0.264996020058104	0	0	0	2.36698280555572e-09	0	0	0
VSNL1	1	1	0	0	0	-0.404982183937115	0	0	0	8.35789471612368e-30	0	0	0
ZFP36	1	1	0	0	0	-0.262673007030106	0	0	0	1.52650776280925e-06	0	0	0
#N/A	#N/A	#N/A	#N/A	#N/A	#N/A	#N/A	#N/A	#N/A	#N/A	#N/A	#N/A	#N/A	#N/A

## Sheet: Layer 5_AD_up_DEG
This spreadsheet is derived from DEGs analysis by comparing gene expression between AD and CT from Layer 5. Column A indicates gene ID. Column B indicates the number of overlapping genes from four comparisons. Column G to column J indicates the log fold change of four comparisons.
Gene	contribution summary					logFC (e as base, cutoff >= 0.25)				adjusted p-value (Wilcoxon test, cutoff <= 0.05)
ID	overlap	AD1 vs CT1	AD2 vs CT2	AD1 vs CT2	AD2 vs CT2	Layer 5_up_logFC_AD1_CT1	Layer 5_up_logFC_AD2_CT1	Layer 5_up_logFC_AD1_CT2	Layer 5_up_logFC_AD2_CT2	Layer 5up_Adj.pval_AD1_CT1	Layer 5up_Adj.pval_AD2_CT1	Layer 5up_Adj.pval_AD1_CT2	Layer 5up_Adj.pval_AD2_CT2
APLP1	4	1	1	1	1	0.425336325586677	0.376129621685162	0.391110561110832	0.341903857209317	2.11810068806744e-32	4.8085355442985e-32	3.08160994083948e-40	1.14560527359253e-42
APOC1	4	1	1	1	1	0.51364917373523	0.603554297369226	0.29992356609029	0.389828689724286	3.51745585188417e-30	3.65678519088064e-42	6.71554218402213e-15	1.18310733564075e-29
AQP4	4	1	1	1	1	0.792674977754731	0.676288790805683	0.451276538682712	0.334890351733664	2.15670407685963e-54	1.33029263536624e-54	1.28568968220154e-34	2.48229220958879e-27
ATP2B4	4	1	1	1	1	0.299006364367209	0.289714934453476	0.363000999098761	0.353709569185028	1.16558835947523e-08	5.11260298606915e-11	1.43848626717563e-21	2.92995614103774e-29
BAIAP3	4	1	1	1	1	0.472223523424016	0.416818539106361	0.520754725659405	0.46534974134175	1.98771088572424e-26	8.94257619589267e-25	1.19194213697587e-46	6.86533293618759e-50
C3	4	1	1	1	1	0.34451522250189	0.67449513440265	0.254152986898718	0.584132898799478	2.13097925627705e-11	1.17920057450983e-48	1.62602127682931e-09	9.27790123912789e-64
CACNA1E	4	1	1	1	1	0.337898961193335	0.288904070430369	0.31308607085982	0.264091180096855	3.20797562783567e-14	2.1256839618702e-10	1.13316186073317e-20	8.55423539480185e-17
CD74	4	1	1	1	1	0.700246324935916	0.856127025638276	0.412966281553886	0.568846982256247	2.84414701440624e-35	1.23636440764281e-66	6.49673281285452e-20	5.26327100822205e-61
CLDND1	4	1	1	1	1	0.310049755365288	0.276862995980022	0.3793039319274	0.346117172542134	1.73725444730827e-06	6.82309073802374e-09	6.30674201503206e-19	3.40213578846535e-27
CPNE6	4	1	1	1	1	0.49515456364643	0.528744789811884	0.250663305941637	0.284253532107091	1.80886745215253e-27	4.80324521410236e-36	8.6355086893771e-11	1.97363049180835e-18
CRYAB	4	1	1	1	1	0.445643128481908	1.15865413895632	0.53269840266432	1.24570941313873	1.67121082556134e-23	9.69592969125183e-120	2.10657954755364e-50	7.33159855070232e-201
CTXN1	4	1	1	1	1	0.436186975024108	0.444139327036821	0.374185299724305	0.382137651737017	2.78834986007896e-29	2.70564736363506e-35	2.27156827416282e-32	2.64927229595855e-43
GABRA5	4	1	1	1	1	0.357627106977023	0.33226446389418	0.311170466714482	0.285807823631639	7.6273104363467e-12	1.68062342143888e-14	3.4132880485695e-15	3.63091562142688e-20
GFAP	4	1	1	1	1	0.624360950943778	0.792850507406693	1.33736495258606	1.50585450904897	3.96825966196704e-92	2.22661924351085e-128	4.09965223445298e-162	1.74639383751659e-212
GNG2	4	1	1	1	1	0.473666657396138	0.393089630013872	0.353423503199313	0.272846475817047	1.13138253260322e-22	1.13554569656041e-18	3.97729966255197e-20	2.72143607073006e-15
HLA-DRA	4	1	1	1	1	0.368963393105179	0.403665815015858	0.32748252114747	0.362184943058148	5.81216875548445e-14	5.37290070111781e-20	1.89102660879442e-18	7.09917743828433e-29
HPCAL4	4	1	1	1	1	0.482118318598347	0.611517101550842	0.251154660533057	0.380553443485552	7.3785596187709e-29	8.44248859691146e-55	1.65782045849082e-11	2.11032970014209e-39
ICAM5	4	1	1	1	1	0.351976075084171	0.319541204306465	0.29970180072804	0.267266929950334	6.51580004949301e-13	3.11181435356295e-12	5.35308182949156e-15	3.66849699272349e-15
LY6H	4	1	1	1	1	0.543361196240484	0.336490111479332	0.561587412516456	0.354716327755304	2.08092345262193e-46	5.36839199896974e-23	3.57513443431046e-71	6.05702688725951e-43
MMD	4	1	1	1	1	0.434083240424066	0.373668781070618	0.417726139489267	0.357311680135819	5.13240392951528e-17	1.16884543476205e-18	3.43972211818083e-25	1.43398871385683e-29
NCAM1	4	1	1	1	1	0.361827431810858	0.306892235244721	0.352618054416568	0.297682857850432	2.28949015068505e-20	1.72190848074784e-15	5.87487693174281e-28	6.02430223038664e-24
NPTXR	4	1	1	1	1	0.627332637757125	0.77620580638992	0.31472025929083	0.463593427923626	2.41165017842185e-49	3.68193220770455e-81	2.94549983662514e-23	5.73101652584742e-66
PEA15	4	1	1	1	1	0.548679901502273	0.69062089136647	0.465718859588498	0.607659849452695	3.60169713494219e-58	2.8448303619381e-94	9.95133273564467e-70	4.49432300366636e-136
PGRMC1	4	1	1	1	1	0.444540218465615	0.399673515364376	0.438366202621204	0.393499499519965	2.47391875603009e-26	1.51419911557568e-23	3.84515592416037e-39	4.04943617615214e-39
PLP1	4	1	1	1	1	0.818591541870408	0.440136645833258	1.38162101070197	1.00316611466482	2.39359931498784e-60	7.07539120124246e-26	1.64277958837184e-144	3.67076953273245e-146
PLPPR4	4	1	1	1	1	0.409214349573875	0.396384038713978	0.374466961285408	0.361636650425511	3.02082740871344e-21	4.17492038134684e-21	1.47890062993536e-28	6.6792879509091e-31
PMP2	4	1	1	1	1	0.426417002916245	0.446630901480562	0.409212277466614	0.429426176030931	5.27398601003047e-18	9.83829870963691e-24	3.26373274569326e-26	1.16114456391176e-37
PTMA	4	1	1	1	1	0.399450336039039	0.394689789248414	0.290565696924173	0.285805150133548	1.20700946093897e-24	4.09323664454486e-29	1.35258983581482e-20	2.05188247089513e-26
QDPR	4	1	1	1	1	0.486451300765076	0.369573497544133	0.421320849589504	0.304443046368561	1.48272330633745e-25	5.47575529054536e-20	2.95989129503286e-28	2.09461326256851e-22
SCD5	4	1	1	1	1	0.496777091102187	0.463606482277895	0.298561451782695	0.265390842958403	5.24606788736929e-35	8.62430634303656e-38	1.40600895044114e-19	1.3183497001121e-20
SCN3B	4	1	1	1	1	0.442662283641414	0.362843820495603	0.411344275831699	0.331525812685887	3.1714547151536e-26	3.4601568551869e-21	6.50079507245143e-35	7.46744034060959e-31
SLC17A7	4	1	1	1	1	0.450503597431811	0.485549951863582	0.510609553199045	0.545655907630816	8.0596296156538e-45	4.73397500579236e-60	8.29766926044527e-77	7.82611577681847e-111
STMN3	4	1	1	1	1	0.32570320278344	0.2604228961162	0.335619410946852	0.270339104279611	7.6448645219575e-19	3.87950686363736e-13	1.14169717705191e-28	9.61798152886285e-24
STUM	4	1	1	1	1	0.422683816710528	0.329723835572268	0.387877334334408	0.294917353196148	5.52737816774165e-26	4.52862700619969e-16	2.17527283935439e-36	4.6165984055565e-24
TIMP2	4	1	1	1	1	0.386591213602942	0.39193520435315	0.329035680272352	0.33437967102256	6.04088083832368e-18	2.96887058077103e-24	6.11008146843683e-20	1.22166151318193e-29
TMEM59L	4	1	1	1	1	0.352536495414076	0.327037159560039	0.329132427519595	0.303633091665559	1.80335974381328e-25	1.33183701251206e-24	1.28404937055146e-31	9.48638127582147e-34
ADGRG1	3	1	1	0	1	0.344200509674745	0.449805136160099	0	0.283768173130645	2.89611013885466e-10	3.55782045876395e-23	0	1.86133641296186e-14
APOD	3	1	1	0	1	0.503402013371646	0.673220116298063	0	0.2759112272424	5.06397478308646e-25	1.08919751318047e-57	0	6.41974688906481e-19
ARF1	3	1	1	1	0	0.328265792573581	0.25981226313421	0.263231390521501	0	5.50567202042526e-17	1.20493378728252e-12	1.71565376225469e-16	0
ARPP19	3	1	1	0	1	0.299472456195735	0.414122398851066	0	0.34863021399924	6.46470019252978e-17	3.19650231658436e-43	0	3.69601111288468e-52
ATP1A2	3	1	1	1	0	0.655093067955681	0.541148531753046	0.254433393857219	0	2.56593463574367e-49	1.53710277194128e-42	1.22461444768574e-13	0
ATP1B2	3	1	1	0	1	0.298400288671805	0.435397889272814	0	0.328816314899426	4.6020057033745e-10	1.88675687999524e-25	0	7.42899708202211e-25
AUXG01000058.1	3	1	1	0	1	0.396946207352404	0.461259296390848	0	0.266396896757655	2.09990185887552e-20	2.95731435782797e-32	0	1.10872941705051e-17
B2M	3	1	1	0	1	0.290149921532313	0.600907983475273	0	0.351924621763709	7.67326414992474e-09	1.07030769056878e-49	0	4.54641200535404e-35
C1QB	3	1	1	0	1	0.268941507620059	1.06665425685765	0	1.03503834843986	5.56450400867733e-06	3.2494693525742e-90	0	2.19308375555246e-142
CD24	3	0	1	1	1	0	0.34204749486971	0.298947148353151	0.485379712875136	0	3.98157340014588e-15	5.41331131459749e-20	2.65282638137772e-56
CD63	3	1	1	0	1	0.341699914876441	0.48075396030844	0	0.267570049964099	5.50060994193083e-14	8.22718788118796e-33	0	1.03596498716291e-17
CLDN11	3	1	0	1	1	0.351550713725109	0	0.520372293626062	0.380412096118727	2.45238993237488e-12	0	1.39613690403665e-50	5.48209983461208e-37
CLSTN2	3	1	0	1	1	0.266182127416068	0	0.475349772519416	0.289089015641505	9.8696118248825e-07	0	2.20062279877516e-39	1.62132262226749e-19
CNTN1	3	1	1	1	0	0.469152672140442	0.281498774149021	0.365874094573749	0	4.53618330716901e-31	6.13644925902901e-12	2.45967873769786e-28	0
CPE	3	1	1	1	0	0.490610490896712	0.258944421076956	0.254810840060243	0	2.78628529661387e-59	4.60621900888053e-24	1.39051785459845e-29	0
CTSB	3	1	1	0	1	0.330296989545725	0.613109121098126	0	0.417290868514802	7.86989628525662e-15	5.38760650316028e-63	0	1.53310775698925e-55
DDAH1	3	1	1	1	0	0.468146966886835	0.292510953632618	0.307173394987955	0	1.6529608082619e-29	1.16058870514799e-13	6.90709578543745e-19	0
DDN	3	1	1	0	1	0.417847114521691	0.452871045320232	0	0.252493907476904	2.55275426657468e-20	4.14437034385809e-27	0	2.35788928190669e-14
DPYSL3	3	1	1	1	0	0.449817275566459	0.319877903114365	0.32395585144346	0	5.03180378257846e-23	2.23050863179773e-13	4.49454193784132e-19	0
ENC1	3	0	1	1	1	0	0.294408403247687	0.312063790465494	0.491270862645955	0	1.68184671056026e-25	2.30103776500005e-26	4.5770182642347e-96
ERMN	3	1	0	1	1	0.371092091140163	0	0.398746365713775	0.267835703919029	1.09032457177351e-16	0	3.52973999249642e-33	9.48689248401754e-20
FABP3	3	0	1	1	1	0	0.264780466819089	0.423243041046983	0.54694620184543	0	2.86345712524206e-06	2.01873831023701e-29	1.0915712085909e-58
FABP7	3	1	1	1	0	0.535910075501519	0.360507690297557	0.400926033399089	0	8.46935400026369e-32	5.34348307722601e-18	3.41639568755317e-28	0
FAM171B	3	1	1	1	0	0.58932296770773	0.252469468801761	0.294701035989079	0	9.88585007588265e-37	7.04821345437374e-07	2.02687354057807e-13	0
FTL	3	1	1	0	1	0.317010333167669	0.972681642634146	0	0.647349197458082	3.93007681762434e-37	7.46879281992994e-129	0	2.10485516559965e-183
GPM6B	3	1	1	1	0	0.668819398260889	0.481250340559215	0.329204459834133	0	1.31148659221106e-63	4.87328772974431e-49	1.5823041986879e-34	0
GPRC5B	3	1	1	1	0	0.573043427230098	0.254320334372806	0.316134062384934	0	3.79193629608761e-30	4.17815246928373e-09	1.27102732077284e-14	0
HIPK2	3	1	1	1	0	0.546746474939636	0.361147949806827	0.331467639979464	0	2.68937817799106e-29	2.20888085353548e-16	6.85151469772795e-17	0
HLA-A	3	1	1	0	1	0.41762620548009	0.520911592468797	0	0.315943306220895	2.82546698432391e-15	7.4967121852106e-34	0	2.11469592522561e-21
HLA-B	3	1	1	0	1	0.264651078348582	0.78820007512216	0	0.448411247192539	0.000232998946618747	4.70804820174095e-64	0	1.74066959814958e-44
ID4	3	1	1	1	0	0.531916340268188	0.400099137843668	0.296614664177326	0	2.00356397798918e-30	1.68594310267994e-21	6.3355140911081e-14	0
LAPTM5	3	1	1	0	1	0.270395656167674	0.414111278876099	0	0.277116606192401	7.25010331465815e-10	5.05067257466044e-26	0	9.75807469521798e-20
MAP4K4	3	1	1	1	0	0.432052104529399	0.273379901131082	0.271919617838653	0	2.09601586283535e-15	1.68171058620248e-08	3.95875487433858e-08	0
MAPK1	3	1	1	1	0	0.43135128265836	0.328386551254173	0.332403587984606	0	6.01475832125456e-29	2.19009114003398e-18	1.55518109392931e-26	0
MARCKSL1	3	1	1	1	0	0.35819011125529	0.294121952237538	0.260533138609222	0	1.55691804770659e-09	5.95300744121262e-09	2.59009490562735e-07	0
MAST3	3	1	1	0	1	0.325498502550469	0.4662252348108	0	0.291680478418476	9.98619887613338e-14	3.1498876149927e-39	0	3.06008223461801e-26
MBOAT7	3	1	1	0	1	0.254129526754819	0.365315553364566	0	0.257041388048089	9.64478854209848e-06	1.80728933730822e-19	0	1.42509122425771e-15
MBP	3	1	1	1	0	1.10427237805775	0.559673796861152	0.744273478272182	0	9.14660439681191e-101	2.25197860510529e-66	2.50259694648539e-117	0
MEG3	3	0	1	1	1	0	0.253204046423218	0.284934831406135	0.352190913308211	0	7.4556749243315e-17	8.83008983408781e-21	9.00472537395773e-50
MOBP	3	1	0	1	1	0.331683775679365	0	0.420444903409793	0.312087668836933	6.78238666831892e-09	0	1.18067235598699e-26	1.58122057676082e-22
MT-ND4	3	1	1	0	1	0.648099741062	0.771984571836035	0	0.267064621491223	6.81766099658166e-109	3.58975887595792e-130	0	3.47938543740727e-110
MTRNR2L1	3	1	1	1	0	3.25932549566779	0.382326737692196	2.79036609714273	0	6.37762405933535e-112	1.42338465965229e-19	9.47465462223675e-165	0
NECAB2	3	1	1	0	1	0.325797943502104	0.458654751437081	0	0.326866363030346	1.96888120996422e-12	1.19389110407234e-28	0	5.94029554833238e-25
NPTX1	3	1	1	1	0	0.417229539733776	0.277893663100222	0.305183181364078	0	2.93478281445206e-24	1.1177573927892e-14	1.98265947400595e-19	0
NSMF	3	1	1	1	0	0.556060465486905	0.352190336387484	0.268125388606197	0	9.90504568689532e-37	3.63056552173752e-16	5.52022871871844e-14	0
PIP4K2A	3	1	0	1	1	0.302527384752806	0	0.314955356330167	0.258415921335066	1.27497244210854e-09	0	4.19435155641061e-17	2.50785137423087e-15
PPP1R14A	3	1	0	1	1	0.258866887229159	0	0.35587799344941	0.306903830666939	0.00149152481014561	0	5.86875770472268e-20	2.01861843484563e-23
PRKCG	3	0	1	1	1	0	0.297046897178982	0.25123038311584	0.38477277667864	0	8.07786670717097e-10	6.29497108583597e-11	3.50333607118729e-31
QKI	3	1	1	1	0	0.657609067751446	0.465285381209057	0.425547292716893	0	3.76308516744016e-43	2.42429795036619e-28	9.5463956505925e-33	0
RPS2	3	1	1	0	1	0.276170630594954	0.50371679250422	0	0.290349791485646	3.57480940349253e-11	5.25992414334339e-48	0	2.93192352879186e-30
SCD	3	1	1	1	0	0.735264798271102	0.263082483166698	0.500443548873518	0	3.76447443790351e-52	1.99838799013118e-06	6.11092776153073e-43	0
SH3BGRL3	3	1	1	0	1	0.354225783839409	0.414331346213277	0	0.268004229629904	1.62343328740837e-14	2.73740894361832e-24	0	2.4212291384979e-16
SLC44A1	3	1	1	1	0	0.372299634217855	0.28947773420299	0.301795994659963	0	8.7636012540759e-13	8.51395791861177e-11	9.82251389911552e-13	0
SPP1	3	0	1	1	1	0	0.879713531030309	0.254681686486312	1.0711869930701	0	1.90439412639153e-69	2.60098881698925e-06	2.45815269971465e-141
SREBF2	3	0	1	1	1	0	0.265426413945658	0.259552957829063	0.337478824598604	0	3.5644470126655e-10	1.98106389498337e-10	7.35567878308118e-28
SYN2	3	0	1	1	1	0	0.324094809401055	0.407278469612717	0.48967567878312	0	4.52701913481145e-22	1.58533862552317e-42	4.67752068574484e-76
SYP	3	1	1	0	1	0.265429796354931	0.476239656212522	0	0.409681752796383	5.49009117864212e-16	8.17930601870231e-60	0	1.52824091681916e-73
TF	3	1	0	1	1	0.474267623056746	0	0.639057346622052	0.319622783013164	9.3091360069194e-17	0	3.06463589758077e-51	3.75036698129095e-25
THY1	3	0	1	1	1	0	0.308992409485784	0.29018645693336	0.481316318186013	0	1.23001762648115e-28	8.741520596156e-28	2.73574518511862e-96
TMSB4X	3	1	1	0	1	0.302890232444793	0.498513927657374	0	0.385804273070853	2.91184409101852e-32	2.23088852034667e-88	0	2.34417852629492e-101
TPT1	3	1	1	0	1	0.261953151349223	0.402281878745798	0	0.260108574825733	4.15066977458733e-14	1.86100578266084e-45	0	2.54361232948714e-34
TUBA1A	3	0	1	1	1	0	0.374104232593824	0.549706503846124	0.716274718295391	0	1.84191725279157e-45	1.45245100155338e-77	6.64534348677786e-152
YWHAZ	3	1	0	1	1	0.252143959643281	0	0.420297679287268	0.390612855080409	1.04579998675871e-14	0	9.163176024554e-59	2.12073509211412e-61
ABCA2	2	1	0	1	0	0.325855333958087	0	0.338531939335104	0	2.10233649920181e-09	0	4.79159086439037e-17	0
ABR	2	1	1	0	0	0.313528472435456	0.261415453154858	0	0	5.23983360193286e-14	1.55148370453105e-10	0	0
AC107398.3	2	1	1	0	0	0.304291462302246	0.273799944396693	0	0	5.77336664380736e-10	9.58919856930682e-10	0	0
ACTB	2	1	1	0	0	0.261487228352431	0.314264307081391	0	0	3.37373063620508e-37	9.06591559816914e-57	0	0
ADD3	2	1	1	0	0	0.307983707226977	0.253740160927686	0	0	6.23770267676129e-08	9.67190155803374e-08	0	0
ADIRF	2	1	1	0	0	0.356858271724501	0.730016498428557	0	0	1.58587026542218e-13	9.58043864621455e-63	0	0
AGAP2	2	1	1	0	0	0.351618643123846	0.319835934095888	0	0	5.51596229523822e-14	3.66655717906487e-14	0	0
AHSA1	2	0	1	0	1	0	0.261215930147198	0	0.261855384501291	0	1.84956736836191e-08	0	7.31351881211381e-16
AIF1	2	0	1	0	1	0	0.41143567949969	0	0.458886125801834	0	1.50054072724687e-24	0	1.10008950270966e-54
AJM1	2	1	1	0	0	0.292350380121322	0.312416376897655	0	0	8.66897936062682e-13	2.48973649428085e-15	0	0
AK4	2	1	1	0	0	0.292519625211695	0.254118020941563	0	0	8.38723120571041e-11	2.00160856014604e-09	0	0
AK5	2	1	1	0	0	0.302125210311439	0.279000732310757	0	0	4.91034043234193e-11	1.69835385044909e-11	0	0
ALDH2	2	1	1	0	0	0.30628520289812	0.254883642289825	0	0	6.07813746299123e-11	3.94040273955642e-07	0	0
ALOX5AP	2	0	1	0	1	0	0.256530567346947	0	0.26584701393417	0	2.64372367491503e-11	0	2.00904223579741e-23
AMER2	2	1	1	0	0	0.340060176073055	0.258293717965328	0	0	4.0761880463986e-12	3.69753711629547e-08	0	0
ANLN	2	1	0	1	0	0.289854787360624	0	0.343896407320111	0	6.30685132509528e-11	0	5.10580859555717e-31	0
APLNR	2	0	1	0	1	0	0.276137748536768	0	0.366285546371526	0	3.11498958162477e-13	0	1.80116696890896e-48
APOE	2	1	1	0	0	0.938067052809466	0.723353988072675	0	0	5.16788616953754e-88	1.75235471876968e-81	0	0
APP	2	1	1	0	0	0.310766057061988	0.290384948098777	0	0	1.3175580822364e-21	1.67545845829463e-21	0	0
AQP1	2	0	0	1	1	0	0	0.31938807704701	0.309718085588381	0	0	6.80241869356987e-31	3.20960084347747e-31
ARF3	2	1	1	0	0	0.284931602275702	0.303859810876704	0	0	1.36136290233019e-15	4.59019588218564e-20	0	0
ARFGEF3	2	1	0	1	0	0.311834438467919	0	0.2606687032361	0	2.48137541114527e-08	0	9.62139616576232e-10	0
ARHGAP5	2	1	1	0	0	0.349434777655499	0.268238412022162	0	0	7.5080595165002e-14	1.56292055572589e-08	0	0
ARL6IP1	2	1	1	0	0	0.315574782162984	0.253793906850567	0	0	5.26176900446334e-15	9.29318013396914e-12	0	0
ARPC4	2	1	1	0	0	0.262050128973109	0.266303020283189	0	0	1.76638281360572e-06	2.32441518746718e-08	0	0
ARPC5	2	1	1	0	0	0.250439655864748	0.255362776991823	0	0	1.92933273199651e-06	4.29167665721632e-08	0	0
ATP1A3	2	0	1	0	1	0	0.306877959964985	0	0.275138232982513	0	3.24180352830106e-20	0	3.38498775730386e-26
ATP2B1	2	1	1	0	0	0.371175843735046	0.258546338468828	0	0	1.00730942686579e-15	3.76108296569224e-07	0	0
ATP2C1	2	1	1	0	0	0.300202928275486	0.273035936978755	0	0	1.55006396546217e-09	1.06261292442509e-09	0	0
ATP9A	2	1	1	0	0	0.258048159050289	0.316496380770075	0	0	3.87964821603719e-08	7.39244600327075e-15	0	0
BAIAP2	2	1	1	0	0	0.263687364029416	0.259414491479851	0	0	2.5626508224133e-05	1.08421906583547e-07	0	0
BCAN	2	1	1	0	0	0.28991118416858	0.270383747248033	0	0	5.10578228478248e-06	1.11535770975364e-08	0	0
BIN1	2	1	0	1	0	0.280036976823184	0	0.256068882471509	0	2.37910259818599e-08	0	8.50888188347061e-12	0
BLCAP	2	1	1	0	0	0.359034009091584	0.263185843422204	0	0	1.36294526259025e-13	4.59531932385422e-09	0	0
BSG	2	1	1	0	0	0.345520663610066	0.546335621868366	0	0	1.8979494028846e-21	6.1772549637412e-57	0	0
BST2	2	0	1	0	1	0	0.268144282256218	0	0.293640109523367	0	7.96294291696322e-10	0	6.01441067974463e-24
C14orf132	2	1	1	0	0	0.287660901933844	0.373061118291445	0	0	4.22210013548507e-07	1.24999484556246e-17	0	0
C1QA	2	0	1	0	1	0	0.835762223776998	0	0.800872577859726	0	6.34202762334603e-64	0	3.39082877083918e-100
C1QC	2	0	1	0	1	0	0.654767398223006	0	0.675368461360863	0	3.84919189093632e-39	0	1.22796111650802e-71
C1R	2	0	1	0	1	0	0.323339237019057	0	0.394629443143014	0	5.98530640343286e-14	0	3.06242944756809e-41
CA2	2	1	0	1	0	0.285874028852625	0	0.276947606697363	0	2.08432830310959e-08	0	9.61321652405696e-14	0
CACNG3	2	0	1	0	1	0	0.300053842855747	0	0.266012939032469	0	9.22716090648796e-12	0	6.52444671204818e-16
CALM3	2	0	1	0	1	0	0.298677203587768	0	0.393768693233119	0	1.6388877472387e-45	0	1.88886999680855e-100
CALN1	2	1	0	1	0	0.36444653719639	0	0.329133359867933	0	2.97002225219789e-19	0	4.66993544490948e-26	0
CALR	2	0	1	0	1	0	0.63656556470244	0	0.557773253220967	0	8.13018250072467e-56	0	2.94594498020801e-74
CAMK2A	2	1	1	0	0	0.314548577597152	0.310037237747705	0	0	4.08408166126928e-11	6.17338584553131e-14	0	0
CAMK2D	2	0	1	0	1	0	0.297117316105388	0	0.343559248967296	0	1.71445016566598e-12	0	1.12140116050817e-29
CANX	2	1	1	0	0	0.366336792183669	0.453921258342878	0	0	1.3741262758685e-17	1.81171881991119e-32	0	0
CAPZB	2	1	1	0	0	0.374276124051773	0.31449510779242	0	0	3.05063997973933e-16	2.07619376643312e-14	0	0
CBX6	2	1	1	0	0	0.256933568525846	0.300775269144704	0	0	1.80167330763765e-06	5.64004122182927e-12	0	0
CCDC92	2	1	1	0	0	0.367037435959831	0.33549653032482	0	0	8.3631242559893e-17	1.41374817940649e-13	0	0
CD81	2	0	1	0	1	0	0.408911322263068	0	0.278441325609592	0	6.32595014863528e-38	0	6.71506480972891e-32
CDH13	2	1	0	1	0	0.407886362846794	0	0.412566226737892	0	1.59199459436701e-15	0	1.22165996949133e-25	0
CDIP1	2	1	1	0	0	0.271119861102287	0.317268772976188	0	0	1.0696480644123e-08	3.73184243766513e-15	0	0
CELF3	2	1	1	0	0	0.274273821151384	0.282615937822622	0	0	1.14757263131089e-09	1.67681143253383e-12	0	0
CELF5	2	1	1	0	0	0.299640494508866	0.331624692352088	0	0	6.53666881931063e-07	1.25334849989862e-14	0	0
CERCAM	2	1	0	1	0	0.275844913383425	0	0.353946171989671	0	2.45641315408447e-06	0	6.81101132653412e-22	0
CHD5	2	1	1	0	0	0.337748795259696	0.309279542160116	0	0	5.34540762413614e-12	1.12418596965544e-11	0	0
CHI3L1	2	0	1	0	1	0	1.27968782313614	0	1.48949842709696	0	1.83377891241484e-106	0	1.08505159560945e-191
CHI3L2	2	0	1	0	1	0	0.273323087016622	0	0.289840955339474	0	8.96802582833516e-15	0	7.01318111898711e-35
CLU	2	1	1	0	0	0.290018058476861	0.475959179400105	0	0	5.02510630387107e-54	3.84230265629636e-110	0	0
CNIH2	2	1	1	0	0	0.356940872738705	0.280500611521711	0	0	1.96379575260349e-13	2.47636603620137e-10	0	0
CNP	2	1	0	1	0	0.490543769874629	0	0.573538424038253	0	9.67116459156371e-24	0	1.39631845251392e-47	0
CNTN2	2	1	0	1	0	0.250655421112996	0	0.322103648807226	0	0.0028099554673183	0	6.63676515719531e-15	0
CORO1A	2	0	1	0	1	0	0.276187940811801	0	0.277376802802366	0	2.22736743317018e-11	0	6.17355391525858e-21
CTNND2	2	1	1	0	0	0.360845607710943	0.293895992398482	0	0	4.18805522794457e-14	3.63423033858552e-12	0	0
CTSD	2	1	1	0	0	0.274510856577632	0.403635741338182	0	0	1.12026292671386e-09	4.46063520508314e-29	0	0
CX3CL1	2	1	1	0	0	0.291448463487466	0.328511910078534	0	0	7.48225823605052e-10	1.69341774561762e-14	0	0
CYBA	2	0	1	0	1	0	0.347115797422619	0	0.310725776130112	0	8.08900418923648e-19	0	4.76658861502055e-26
DAAM2	2	1	0	1	0	0.389958220150846	0	0.278670754740045	0	6.82355690282648e-19	0	1.06729398405746e-14	0
DBI	2	1	1	0	0	0.489676248409591	0.630447317720185	0	0	1.24635470847714e-26	4.44066487132478e-49	0	0
DDIT4	2	1	1	0	0	0.344326382920553	0.388671265307087	0	0	1.40726123213345e-15	1.26688867272619e-21	0	0
DDR1	2	1	1	0	0	0.321748226945155	0.270239692842819	0	0	1.6602400352431e-09	1.20554622993964e-08	0	0
DNAJA1	2	0	1	0	1	0	0.339989357140595	0	0.442651194556344	0	5.65206680244331e-18	0	1.02084509048028e-50
DNAJA4	2	0	1	0	1	0	0.429007910106124	0	0.406327072882991	0	2.50097334594492e-25	0	8.7490334569087e-39
DNAJB1	2	0	1	0	1	0	0.323214025724835	0	0.401062955728295	0	7.79405772867533e-13	0	1.35656443351502e-34
DNAJB2	2	1	1	0	0	0.296071488622097	0.426977514720189	0	0	3.92951118507336e-08	7.86221990065405e-30	0	0
DNER	2	1	1	0	0	0.274525361839416	0.261225411651155	0	0	2.14276607010516e-07	7.56727647106234e-08	0	0
DTNA	2	0	1	0	1	0	0.607393031066104	0	0.330404698651185	0	8.76592288413646e-47	0	1.65752037988587e-26
DVL1	2	1	1	0	0	0.257398466541736	0.251685946213564	0	0	3.0408290902177e-07	1.61405312494039e-08	0	0
EDIL3	2	1	1	0	0	0.262170553524536	0.286835916842276	0	0	0.000500650611274927	2.07358634476443e-10	0	0
EDNRB	2	1	0	1	0	0.502815318559225	0	0.461258092266461	0	9.48884228988399e-31	0	2.02680895714913e-43	0
EEF1A1	2	1	1	0	0	0.327311352953644	0.251285576430711	0	0	1.59170407659723e-39	1.89424558857161e-30	0	0
EEF1B2	2	1	1	0	0	0.26715635338252	0.297386603840959	0	0	1.9948623857701e-05	3.08382608948336e-11	0	0
EEF1G	2	1	1	0	0	0.309355131403525	0.333317164522755	0	0	4.26604342727937e-10	7.58905470307194e-16	0	0
EFHD1	2	1	0	1	0	0.368347507640404	0	0.261157475688159	0	9.44111931897166e-14	0	1.28521470694553e-09	0
EIF5A	2	1	1	0	0	0.301479366583167	0.318656542079134	0	0	1.1930206118017e-09	2.85485934235154e-15	0	0
ELK1	2	1	1	0	0	0.377529832451343	0.339293531099183	0	0	4.55551537586895e-16	6.43389307853575e-15	0	0
ENPP2	2	1	0	1	0	0.289972524453831	0	0.411844835812017	0	3.58657429048696e-08	0	1.77065286548172e-34	0
ERBIN	2	1	0	1	0	0.379057033686842	0	0.274221075879866	0	3.21803899514998e-14	0	8.75386595289223e-11	0
FAIM2	2	1	1	0	0	0.373977440811076	0.427298151735201	0	0	6.7418121659977e-28	1.32794117673566e-45	0	0
FAM107A	2	1	1	0	0	0.674007997287546	0.706730857552477	0	0	4.54795222041343e-64	2.9275857843227e-86	0	0
FASN	2	1	0	1	0	0.253729132515147	0	0.25617231731028	0	1.08352885143477e-05	0	1.26361454185158e-10	0
FBXL16	2	1	1	0	0	0.376067494838476	0.330218283138106	0	0	3.05941472944932e-27	3.97099677900673e-21	0	0
FCER1G	2	0	1	0	1	0	0.430510721909812	0	0.48905063170374	0	3.98027892253687e-27	0	3.41120061955887e-63
FCGBP	2	0	1	0	1	0	0.382441021000642	0	0.447772808971534	0	1.98819417889134e-23	0	3.35130694839359e-61
FCGR3A	2	0	1	0	1	0	0.27125837405719	0	0.375080616513154	0	4.83339689103534e-12	0	4.66001766979966e-45
FGD5-AS1	2	1	1	0	0	0.331672780687584	0.256998841764307	0	0	7.15724306870156e-12	5.12385887407376e-08	0	0
FGFR3	2	1	1	0	0	0.492189820340263	0.26564552611263	0	0	5.40761945106917e-23	1.71700814724061e-07	0	0
FKBP1A	2	1	1	0	0	0.435393170294736	0.389029959110249	0	0	1.76041116973002e-22	1.96037523629677e-21	0	0
FSCN1	2	1	1	0	0	0.26519579850054	0.266976816800283	0	0	7.40352620145704e-06	9.46685334396172e-08	0	0
FXYD6	2	0	0	1	1	0	0	0.543894689617922	0.430425706866234	0	0	3.08827917532489e-68	1.94231199157587e-68
GATM	2	1	1	0	0	0.358244941828831	0.311523675640987	0	0	1.28378787278261e-13	3.00231939082512e-14	0	0
GDA	2	1	0	1	0	0.362353809362545	0	0.377437459671927	0	5.95602479079378e-13	0	2.68338471534622e-23	0
GDI1	2	1	1	0	0	0.262616837433541	0.302617695099733	0	0	4.75587555702571e-17	2.24538772222418e-25	0	0
GJA1	2	1	1	0	0	0.864081319691821	0.799670518902685	0	0	1.63164861914543e-61	8.11838451021841e-68	0	0
GLUD1	2	1	0	1	0	0.484522699854151	0	0.302315070716259	0	2.17982855847979e-28	0	1.23520216413023e-17	0
GNAO1	2	1	1	0	0	0.288511603814156	0.274820384804177	0	0	5.84701149629818e-10	3.72877499249568e-12	0	0
GNB2	2	1	1	0	0	0.259810504141507	0.286431548551425	0	0	1.63482886694401e-06	4.69494695409047e-10	0	0
GP1BB	2	1	1	0	0	0.376863205170657	0.330547832439062	0	0	4.31335380963216e-16	1.66180699083568e-14	0	0
GPM6A	2	1	1	0	0	0.3260738532639	0.267330030818298	0	0	1.47580933489395e-35	1.47084512222502e-29	0	0
GPR37L1	2	1	1	0	0	0.386267520086763	0.366064181685398	0	0	5.93178004848024e-15	1.10496303518079e-16	0	0
GRIA1	2	1	0	1	0	0.357504475301108	0	0.321842926605254	0	2.65763482087471e-12	0	2.47900732916536e-17	0
GRIN2B	2	1	1	0	0	0.29772825891908	0.32231830788495	0	0	1.23140934180679e-09	1.3234906793221e-14	0	0
GSN	2	1	1	0	0	0.323980486930759	0.251507706937049	0	0	4.47873927783236e-09	1.18811267180122e-05	0	0
GUCY1B1	2	1	1	0	0	0.270739434068359	0.264498736996124	0	0	1.06312899081441e-06	1.62369833012625e-08	0	0
HADHB	2	1	0	1	0	0.369188092009594	0	0.250038102474582	0	2.17050584057188e-15	0	9.93170057399526e-11	0
HEPACAM	2	1	1	0	0	0.482415616558496	0.375683380939939	0	0	1.82347510303141e-26	2.7331679491904e-17	0	0
HHATL	2	1	0	1	0	0.331711720739379	0	0.253840252248422	0	2.30999383873054e-13	0	2.81436247937502e-12	0
HLA-C	2	1	0	1	0	0.370497946696264	0	0.465345988196016	0	3.85465401910212e-13	0	3.40621095280124e-35	0
HMGCS1	2	0	0	1	1	0	0	0.332710030950307	0.275388051471218	0	0	9.16278803859163e-20	4.87145314396203e-18
HNRNPDL	2	1	0	1	0	0.346752071509655	0	0.289487346711132	0	4.26252893474335e-16	0	6.64938293055251e-18	0
HNRNPK	2	1	1	0	0	0.292150807206695	0.261816571776184	0	0	1.01305567956585e-10	1.24047513549358e-09	0	0
HPCAL1	2	1	1	0	0	0.464188617889442	0.295751280500228	0	0	1.16560727113066e-20	1.64980204170837e-08	0	0
HSP90AA1	2	0	1	0	1	0	0.549209199621449	0	0.65703105282027	0	2.04752672997217e-102	0	1.01363993464115e-179
HSP90AB1	2	0	1	0	1	0	0.388788422093528	0	0.437730682586367	0	6.63680343550221e-63	0	3.24884175060415e-115
HSP90B1	2	0	1	0	1	0	0.57045858835584	0	0.665584946338758	0	4.03799429182583e-51	0	1.68873968917173e-98
HSPA1A	2	0	1	0	1	0	0.640698401231428	0	0.69221628263038	0	5.71122736204797e-47	0	1.15830022581508e-86
HSPA1B	2	0	1	0	1	0	0.391331871524403	0	0.313192241813315	0	1.09993255906339e-19	0	5.38665552456781e-22
HSPA2	2	1	0	1	0	0.283192442336556	0	0.263836107330898	0	2.06785918802561e-06	0	1.27850312745315e-09	0
HSPA5	2	0	1	0	1	0	0.390740628706306	0	0.527056766054837	0	1.6823509121362e-20	0	5.02819773358553e-59
HSPB1	2	0	1	0	1	0	1.18433682980908	0	1.06162935524556	0	4.72162835133978e-119	0	5.12229561444574e-183
HSPB8	2	0	0	1	1	0	0	0.257215630999161	0.282611166391891	0	0	9.2340185826616e-12	4.22138221519384e-20
HSPD1	2	0	1	0	1	0	0.399006215593702	0	0.386644613629948	0	2.24232451712535e-23	0	3.6945516442799e-36
HSPH1	2	0	1	0	1	0	0.405359375359787	0	0.531588331549825	0	2.6086526150971e-26	0	6.07489522222955e-67
IDS	2	1	1	0	0	0.484153254143169	0.406496241821952	0	0	2.01060425911796e-63	1.86968296066005e-61	0	0
IFI27L2	2	1	1	0	0	0.26735337830681	0.25258189489153	0	0	9.48662702186437e-08	5.63992733903022e-07	0	0
IFI6	2	1	1	0	0	0.351895935641498	0.25033692966673	0	0	3.90665391915854e-12	3.55793061851928e-07	0	0
IFITM2	2	0	1	0	1	0	0.271133106826557	0	0.490826395948614	0	3.82747042774887e-09	0	9.00365483740776e-55
IFITM3	2	0	1	0	1	0	0.588923436174921	0	0.53400054135285	0	7.16842946725621e-49	0	1.74761550222282e-70
IGFBP5	2	1	0	1	0	0.47955500002178	0	0.366703812634796	0	6.44253652271698e-27	0	8.95357599736148e-24	0
IL6ST	2	1	1	0	0	0.298992881281739	0.2507206187864	0	0	3.41370654306028e-08	2.40159893789187e-06	0	0
ITGB2	2	0	1	0	1	0	0.341213654576985	0	0.323805546190482	0	2.34909182367297e-16	0	3.17497884460117e-27
ITGB4	2	0	1	0	1	0	0.354610405792064	0	0.378686200030741	0	2.78480503718297e-15	0	1.04925846432907e-31
ITM2C	2	1	1	0	0	0.382078184021018	0.392879469662795	0	0	7.91152141829052e-28	9.41440824445376e-32	0	0
ITPKB	2	1	0	1	0	0.364527846456204	0	0.286221752822585	0	5.128453192164e-14	0	7.18221932533492e-14	0
JUND	2	1	1	0	0	0.389332847038564	0.284822209968038	0	0	1.17225217313266e-21	3.17759571830509e-14	0	0
KIF1A	2	1	1	0	0	0.400384304907244	0.37309328403078	0	0	2.09270910225011e-33	2.16619313045888e-34	0	0
KIF5A	2	1	1	0	0	0.397649482034733	0.281401258470422	0	0	6.30125545197123e-32	2.15322413696455e-17	0	0
LAMP2	2	1	0	1	0	0.283277512190558	0	0.336774057009681	0	6.0234420863646e-07	0	2.49784083811156e-18	0
LAMP5	2	0	1	0	1	0	0.415950359854217	0	0.319540877177027	0	2.53466900342081e-22	0	3.17716525156817e-22
LHPP	2	1	1	0	0	0.303097094833049	0.260818880037723	0	0	1.16075954307933e-09	2.70456867764653e-10	0	0
LINC02607	2	0	1	0	1	0	0.34324778342844	0	0.324788080328708	0	3.0358251294665e-17	0	2.77916240183406e-28
LINGO1	2	1	1	0	0	0.274144627016618	0.320798781684656	0	0	1.19284670672031e-06	4.5556389864763e-13	0	0
MAG	2	0	0	1	1	0	0	0.351207833564558	0.282216145923555	0	0	6.13283979298771e-23	6.48627996733572e-21
MAOB	2	0	1	0	1	0	0.380158004854525	0	0.303835505201047	0	2.49784871370726e-19	0	5.64166318109722e-22
MAP1A	2	1	1	0	0	0.338547679996494	0.279052042867915	0	0	2.35358801934107e-24	2.81423380949534e-20	0	0
MAP2	2	1	1	0	0	0.279156333972299	0.336943133716923	0	0	1.32161391119588e-14	6.62505974543711e-29	0	0
MAP2K1	2	1	0	1	0	0.338664925763296	0	0.381234755991056	0	3.7939594594533e-13	0	7.31776995411505e-25	0
MAP4	2	1	1	0	0	0.337108175881541	0.383958002817409	0	0	5.73110758445762e-15	1.01195922078492e-26	0	0
MAPK3	2	1	1	0	0	0.315111430383821	0.257908927317068	0	0	1.05376337863042e-10	4.39786880863864e-08	0	0
MAPK8IP1	2	1	1	0	0	0.393393993715803	0.380996132667156	0	0	3.8845727241177e-16	2.1693821635999e-20	0	0
MAPRE2	2	1	1	0	0	0.269515103123501	0.332296151078301	0	0	5.60591458413853e-09	8.3532255559497e-16	0	0
MAZ	2	1	1	0	0	0.279784852675919	0.251208372689391	0	0	3.31417452072044e-07	1.91253141129813e-08	0	0
METRN	2	1	1	0	0	0.535091112240688	0.436002539472982	0	0	4.75770596298402e-29	1.67772657594009e-22	0	0
METTL7A	2	1	1	0	0	0.385390304416073	0.35233202694499	0	0	4.59189494270051e-14	4.40997159351775e-15	0	0
MGST1	2	0	1	0	1	0	0.620069318591803	0	0.454650814291642	0	8.63930828851678e-45	0	1.25647988970167e-42
MIF	2	1	0	1	0	0.270144726944081	0	0.289151456376392	0	5.66807314055292e-18	0	1.63846879133712e-29	0
MLC1	2	1	1	0	0	0.393872119471983	0.255958975447989	0	0	5.18076265147005e-15	2.4439372634131e-07	0	0
MT-ATP6	2	1	1	0	0	0.762451371559291	0.740014358149375	0	0	1.67205181319144e-109	5.50983745586714e-129	0	0
MT-ATP8	2	1	1	0	0	0.763792290160735	0.813585255334663	0	0	9.0261088004203e-50	2.99705060107701e-64	0	0
MT-CO1	2	1	1	0	0	0.399692438441678	0.333547138201901	0	0	7.9484644453324e-95	3.41313112240873e-76	0	0
MT-CO2	2	1	1	0	0	0.469263705511472	0.476188958784899	0	0	5.59470781227754e-102	5.50662574502167e-118	0	0
MT-CO3	2	1	1	0	0	0.659707972792258	0.574650246385502	0	0	2.00534988323279e-109	8.17827536559494e-125	0	0
MT-CYB	2	1	1	0	0	0.769739134896292	0.774552610731231	0	0	1.84737860129668e-109	1.72960975121118e-128	0	0
MT-ND1	2	1	1	0	0	0.465499955444113	0.503506662720715	0	0	6.3196563424578e-93	2.51677779937847e-110	0	0
MT-ND2	2	1	1	0	0	0.515539105403718	0.502475433081492	0	0	4.58920474162627e-83	9.66728953710069e-93	0	0
MT-ND3	2	1	1	0	0	0.764058112624574	0.768039374775253	0	0	2.40782105237293e-109	1.28170052545284e-129	0	0
MT-ND4L	2	1	1	0	0	0.867356807260383	1.046936866157	0	0	6.90878695963014e-78	2.32940112794622e-109	0	0
MT-ND5	2	1	1	0	0	0.687919758214131	0.786574065815889	0	0	1.77685295039125e-85	2.13877176474538e-107	0	0
MT-ND6	2	1	1	0	0	0.407775024640974	0.326653466778419	0	0	4.8633930543658e-18	5.62882232796755e-15	0	0
MT3	2	1	1	0	0	0.27676385296816	0.540228826457329	0	0	5.40993632903688e-50	2.21355704302428e-121	0	0
MTCH1	2	0	0	1	1	0	0	0.316932650132651	0.373053909529727	0	0	6.0582240518812e-31	4.83906180774824e-57
MTPN	2	1	1	0	0	0.424782138567874	0.41388550141044	0	0	1.45025700986094e-24	1.27071558475263e-25	0	0
MTRNR2L6	2	1	0	1	0	0.549823790330843	0	0.283858963586483	0	7.30161036438077e-35	0	5.6682178481011e-14	0
MTURN	2	1	1	0	0	0.470285365469789	0.477525042155861	0	0	1.55017306803614e-31	6.20413746306975e-40	0	0
MYRF	2	1	0	1	0	0.325170642575101	0	0.40442162430056	0	2.58523044984941e-11	0	2.78158949837278e-34	0
NACC1	2	1	1	0	0	0.27289228742946	0.258236428611106	0	0	6.57412036372294e-12	4.41528670590333e-10	0	0
NCAM2	2	1	1	0	0	0.310502299579728	0.284339846045375	0	0	2.15357339054944e-09	6.24234922251454e-09	0	0
NCAN	2	1	1	0	0	0.309789002261441	0.264735031893253	0	0	2.09443894660156e-09	2.59389447583403e-08	0	0
NCS1	2	1	1	0	0	0.276432431458457	0.344957303659214	0	0	4.12305079051241e-09	8.19760414598436e-19	0	0
NFIB	2	1	1	0	0	0.316509335598185	0.323282703112832	0	0	1.66428097504861e-11	3.11300567974791e-13	0	0
NKAIN2	2	1	1	0	0	0.252533002778925	0.256415947597838	0	0	5.55080618034987e-06	3.55931936368818e-10	0	0
NKAIN4	2	1	0	1	0	0.298561939667658	0	0.27437638936633	0	2.70107566300115e-13	0	4.24283259073561e-20	0
NKX6-2	2	1	0	1	0	0.269678655481064	0	0.354368736965323	0	6.12309033130691e-10	0	2.9149602860176e-34	0
NNAT	2	1	1	0	0	0.35811883914669	0.286175283931944	0	0	4.14790936140414e-12	2.92779033911483e-10	0	0
NPTX2	2	0	1	0	1	0	0.385049418147925	0	0.318335666527621	0	2.17183550485017e-21	0	4.56430051577816e-25
NPY	2	1	1	0	0	0.395531870890347	0.25719479852381	0	0	3.73965085707619e-20	6.91094668279806e-11	0	0
NR2F2	2	1	1	0	0	0.311881148383185	0.256392149463135	0	0	1.40073052558428e-16	4.01948347819142e-13	0	0
NRXN2	2	1	1	0	0	0.401860042402674	0.419191079741744	0	0	4.89314549368934e-17	2.89670029727096e-24	0	0
NSG2	2	0	1	0	1	0	0.331809007703692	0	0.36645940274753	0	2.41087224442687e-14	0	7.70570648657902e-31
NTRK2	2	1	1	0	0	0.382474377171647	0.257894089751319	0	0	2.26366017745312e-22	7.67742158537663e-12	0	0
NTSR2	2	1	1	0	0	0.419484695328709	0.348060024311366	0	0	3.93718156217976e-23	1.45713404304552e-18	0	0
NUPR1	2	0	1	0	1	0	0.736408944512441	0	0.775801858682134	0	1.26415541336092e-58	0	1.27896517372115e-105
OLIG1	2	1	1	0	0	0.407367600946867	0.294077639942199	0	0	1.43308542489903e-15	1.12843336977105e-09	0	0
OPALIN	2	1	0	1	0	0.272580781741962	0	0.345851466657263	0	7.69782136751572e-07	0	8.56807197869071e-22	0
PALM	2	1	1	0	0	0.357709456341079	0.445105593112743	0	0	5.15222565039142e-14	1.12459219316973e-26	0	0
PBXIP1	2	1	1	0	0	0.270107489237174	0.30160609816166	0	0	1.20720157586734e-06	6.43585525649157e-12	0	0
PCBP2	2	1	1	0	0	0.419821512225131	0.360413737178431	0	0	4.05023624444813e-24	4.92699168198692e-21	0	0
PCDH17	2	1	0	1	0	0.269476838061412	0	0.274635667396327	0	4.8735917853099e-07	0	1.01899584447653e-14	0
PCDH9	2	1	1	0	0	0.310419465099347	0.279020852241019	0	0	4.17527285999662e-08	7.29259966164119e-08	0	0
PDE2A	2	1	1	0	0	0.338415043912653	0.27695219806741	0	0	5.86448388247449e-13	1.04370316702147e-09	0	0
PDIA3	2	0	1	0	1	0	0.262776083684678	0	0.268627028893094	0	5.77006489764043e-08	0	1.2539174067522e-17
PDIA6	2	0	1	0	1	0	0.314661743909518	0	0.279574839879366	0	2.41084241560714e-13	0	1.20371650238844e-19
PDZD4	2	1	1	0	0	0.290823743572536	0.372237375058917	0	0	2.72608684683841e-07	1.6795436631004e-19	0	0
PEG10	2	1	0	1	0	0.47318887430057	0	0.478356599443336	0	9.0008487273225e-24	0	6.99231355556666e-38	0
PGAP1	2	1	0	1	0	0.26034072684746	0	0.262328799072846	0	1.10338563677227e-08	0	2.45016751072805e-16	0
PGBD5	2	1	1	0	0	0.312562618283036	0.284701444313643	0	0	9.51494689125215e-10	4.5357053340314e-10	0	0
PGM2L1	2	1	0	1	0	0.280181377680213	0	0.388496060499501	0	1.45005431837826e-06	0	2.81837152975839e-23	0
PIP4K2B	2	1	1	0	0	0.342811681064061	0.327244670528668	0	0	9.90585797770099e-15	2.97512359911913e-17	0	0
PKP4	2	1	1	0	0	0.305777905343521	0.252713768820246	0	0	1.62968571128673e-08	1.82888116162793e-08	0	0
PLAAT4	2	0	1	0	1	0	0.442072738840944	0	0.40753188957876	0	1.98256819892125e-28	0	4.1515675786229e-42
PLEKHB1	2	1	1	0	0	0.613784650204746	0.442838025478125	0	0	4.79613190603999e-40	4.09485036053599e-28	0	0
PLEKHH1	2	1	0	1	0	0.389592789852608	0	0.339542503704655	0	1.26861176747995e-18	0	1.08886603745841e-23	0
PLPP3	2	1	1	0	0	0.327522003636061	0.270192473170826	0	0	6.78539561247499e-10	6.79447906738895e-09	0	0
PLPPR2	2	1	1	0	0	0.448730480024029	0.338768665583919	0	0	1.14012032375572e-25	9.92534840149393e-14	0	0
PLTP	2	1	1	0	0	0.329333598334411	0.442526347502786	0	0	5.88850163097135e-12	2.05071620985311e-27	0	0
PLXNB1	2	1	0	1	0	0.366554310821026	0	0.274436053457514	0	2.91791648222087e-13	0	8.87401529596234e-12	0
POLR2L	2	0	1	0	1	0	0.4246001014337	0	0.283381515511145	0	3.7162539384897e-27	0	4.53000048899795e-22
PPDPF	2	0	1	0	1	0	0.53614525125372	0	0.411356862975011	0	3.9427773894127e-44	0	4.52379611920085e-45
PPIB	2	1	1	0	0	0.259582576697423	0.302056599874915	0	0	1.21060949654886e-07	2.43809458851953e-13	0	0
PPP1R9B	2	1	1	0	0	0.2828777860959	0.283577217101362	0	0	6.94071678047618e-08	3.44438646218052e-09	0	0
PPP2CB	2	1	1	0	0	0.327587889424388	0.344413657307656	0	0	4.16266200354663e-13	1.32942670052495e-19	0	0
PPP2R2C	2	1	1	0	0	0.32220162719714	0.35451368297929	0	0	8.45154941839299e-11	1.92999456764284e-19	0	0
PRNP	2	1	1	0	0	0.251707579702757	0.316258107317016	0	0	2.47729199609545e-16	1.89566559087503e-30	0	0
PRRC2B	2	1	1	0	0	0.367535907384252	0.335380183170943	0	0	8.19384051424898e-15	1.60412918823713e-14	0	0
PRRT1	2	1	1	0	0	0.259283923578694	0.280997736376159	0	0	7.92378397054426e-06	2.81949977835267e-09	0	0
PSD	2	1	1	0	0	0.406691740637279	0.39444910520294	0	0	5.05834639610225e-19	2.15409992863253e-25	0	0
PSD2	2	1	0	1	0	0.397826825327236	0	0.315405136130405	0	1.50731152382283e-17	0	6.28063311539753e-17	0
PSD3	2	1	1	0	0	0.374795972411169	0.351100515530732	0	0	6.85864084927999e-17	4.88636330037518e-17	0	0
PTGDS	2	1	0	1	0	0.504509947723722	0	0.301356687126933	0	1.89962693089097e-54	0	4.69374869986662e-34	0
PTGES3	2	0	1	0	1	0	0.469590298235668	0	0.284161511960348	0	1.20021225983814e-34	0	1.64840635720653e-22
PTMS	2	1	1	0	0	0.427317746753072	0.381413166043256	0	0	8.32307019695178e-25	3.21071182046176e-22	0	0
PTN	2	1	0	1	0	0.310251590450562	0	0.252402126779346	0	2.31105433726602e-06	0	1.17144281797768e-06	0
PTP4A2	2	1	1	0	0	0.300728787752748	0.251921262321499	0	0	6.30275518497511e-09	6.19511522601987e-08	0	0
PTPRZ1	2	1	1	0	0	0.421036921207743	0.424893771890194	0	0	1.2374565264942e-16	3.12385806096248e-22	0	0
RAB7A	2	1	1	0	0	0.259822054636662	0.266139426453583	0	0	1.44628889532331e-06	4.28287615963614e-08	0	0
RAC1	2	1	1	0	0	0.27182910385422	0.292351843798764	0	0	1.99119723037861e-10	5.9795567858463e-14	0	0
RACK1	2	1	1	0	0	0.267892316611421	0.311945966420209	0	0	1.19649807816204e-09	1.47996378313401e-16	0	0
RAP2B	2	1	1	0	0	0.253081166834656	0.257542713182341	0	0	2.18763159262772e-08	1.6856899349188e-09	0	0
RHBDD2	2	1	1	0	0	0.273805456424461	0.292939920762682	0	0	1.5871710678266e-11	2.7538029978489e-14	0	0
RIPOR2	2	1	1	0	0	0.305916136784964	0.256411865940196	0	0	5.08144241480949e-10	3.39271018444052e-09	0	0
RNASET2	2	1	1	0	0	0.285094466000398	0.341258637820735	0	0	6.58012038261221e-09	9.77961256845644e-16	0	0
RPL11	2	1	1	0	0	0.279538859192154	0.411340072551185	0	0	7.86178876427546e-09	3.78953388386989e-25	0	0
RPL13	2	1	1	0	0	0.359148548787848	0.368473571138926	0	0	8.89330688369191e-32	1.32625333843504e-39	0	0
RPL13A	2	1	1	0	0	0.301282710030999	0.433188032315146	0	0	3.05598138625347e-16	1.13849041357957e-47	0	0
RPL23A	2	1	1	0	0	0.251620893554465	0.309259295095307	0	0	2.89452138191733e-06	9.00522040365424e-17	0	0
RPL27A	2	1	1	0	0	0.320953257423394	0.414087566516505	0	0	1.90824063363291e-11	9.52544420646442e-27	0	0
RPL30	2	1	1	0	0	0.278125053300698	0.318892809061922	0	0	3.16668285344901e-11	3.82290485879153e-19	0	0
RPLP0	2	0	1	0	1	0	0.43798344014245	0	0.250827897157271	0	1.4450040070665e-26	0	4.40402244527657e-14
RPS17	2	1	1	0	0	0.273290302932539	0.383570346734962	0	0	3.02731435127536e-08	2.37754717768541e-25	0	0
RPS18	2	1	1	0	0	0.314560423795229	0.454025042565114	0	0	2.81373053336447e-15	1.20441344496113e-42	0	0
RPS19	2	1	1	0	0	0.279360548596799	0.507229421585638	0	0	2.55522252479929e-12	1.69683392512797e-51	0	0
RPS29	2	1	1	0	0	0.27676113413627	0.290076747072172	0	0	1.04851460947414e-10	5.50364929266835e-19	0	0
RPS6	2	1	1	0	0	0.289321052329599	0.381776849642537	0	0	1.11958008408354e-11	4.60538706961352e-30	0	0
RPS9	2	1	1	0	0	0.277446091557875	0.315267869526624	0	0	7.96574597486114e-10	3.30202999069935e-16	0	0
RTL8C	2	1	1	0	0	0.289177382800134	0.268960487325524	0	0	6.45478217202418e-12	4.33439115174964e-14	0	0
S100A10	2	0	1	0	1	0	0.374665447257238	0	0.356963162357885	0	3.63874530682363e-20	0	6.70568345481404e-32
S100A11	2	0	1	0	1	0	0.375389628435132	0	0.306178844548103	0	1.79973893600746e-20	0	1.13039205262406e-23
S100A8	2	0	1	0	1	0	0.278431831300048	0	0.399383482687942	0	2.5779351830419e-10	0	4.44527193197387e-43
SCOC	2	1	1	0	0	0.27011423867444	0.315978025990367	0	0	1.57385671450837e-06	1.42914622665686e-12	0	0
SEC11C	2	0	1	0	1	0	0.37341659922496	0	0.251281095984022	0	2.17971941696852e-18	0	8.86214543596991e-14
SELENOP	2	1	1	0	0	0.352090585457028	0.34451333938727	0	0	5.05455613388641e-10	2.29769485607733e-15	0	0
SEPTIN3	2	1	1	0	0	0.346674469507805	0.335246302739224	0	0	3.57000641323033e-18	6.51544530519504e-22	0	0
SERF2	2	0	1	0	1	0	0.461333195198484	0	0.382511045463897	0	4.53945743019291e-45	0	9.52521825095498e-52
SERPINE2	2	1	1	0	0	0.292247720636703	0.269775794096967	0	0	7.02118854099291e-07	4.38089457738936e-08	0	0
SGK1	2	1	0	1	0	0.281501059327939	0	0.342148192765999	0	3.01070567718272e-08	0	9.98634780830764e-25	0
SHISA4	2	1	1	0	0	0.319434658023682	0.272420777208521	0	0	7.43972178653273e-10	6.58011408080488e-09	0	0
SIRT2	2	1	1	0	0	0.272624840751669	0.276688203226229	0	0	2.24824901906439e-06	1.48564007771034e-09	0	0
SLC1A3	2	1	1	0	0	0.481532395673258	0.56663010341439	0	0	1.9518882448494e-27	1.03270503153127e-46	0	0
SLC25A22	2	1	0	1	0	0.328646076822283	0	0.304119217940558	0	1.76707292998155e-10	0	9.92979722777472e-14	0
SLC25A23	2	1	1	0	0	0.269117241623786	0.299652636988271	0	0	2.00434911545091e-06	1.5747039147246e-10	0	0
SLC2A13	2	1	1	0	0	0.253609361101692	0.276008149946619	0	0	2.33421078083865e-07	7.47567668786153e-12	0	0
SLC30A3	2	0	1	0	1	0	0.37109917841727	0	0.431627021394848	0	3.01446222345098e-20	0	3.53035365528945e-46
SLC4A3	2	1	1	0	0	0.274675185796547	0.251624937374683	0	0	4.30965064653683e-08	2.71137387572403e-08	0	0
SLC6A8	2	1	1	0	0	0.264034857387602	0.276028363060214	0	0	4.35284179239311e-07	4.08330730539811e-10	0	0
SLC8A2	2	1	1	0	0	0.331094162169445	0.37987812168135	0	0	2.29330184621033e-11	1.25547205043293e-21	0	0
SLIT1	2	1	0	1	0	0.333680572182068	0	0.265681767657517	0	2.23213084167578e-11	0	3.63866545003972e-11	0
SMIM29	2	0	1	0	1	0	0.303598078204932	0	0.289103876098438	0	6.5594795897413e-11	0	8.01734491292781e-18
SNCA	2	0	0	1	1	0	0	0.436159754285151	0.407247021628706	0	0	6.60937390899546e-37	1.35046674495009e-44
SNCG	2	0	1	0	1	0	0.295875042876624	0	0.455694467515423	0	1.45241621133929e-15	0	1.05005302308902e-54
SNX3	2	0	1	0	1	0	0.372803364187432	0	0.315952023376534	0	5.04916549977462e-23	0	1.15467372971748e-26
SOD2	2	0	1	0	1	0	0.592060444859628	0	0.49248378868134	0	5.49636071180187e-57	0	2.63645049036353e-68
SOWAHA	2	1	1	0	0	0.341525639099774	0.377827422303127	0	0	3.34829365306817e-13	1.45496734174953e-20	0	0
SOX2	2	1	1	0	0	0.373350483751186	0.280735256043764	0	0	9.87773284526432e-20	1.12579509999678e-11	0	0
SPARC	2	0	0	1	1	0	0	0.298236926156026	0.29598399510412	0	0	3.25020691003599e-14	2.8185575193414e-18
SPTBN1	2	1	1	0	0	0.386942084807313	0.281627356433221	0	0	3.80466702343244e-26	5.83885689392154e-15	0	0
ST8SIA3	2	1	1	0	0	0.283009526660173	0.311766695822205	0	0	6.4756614253721e-09	7.21078855901314e-13	0	0
STIP1	2	0	1	0	1	0	0.251365024046051	0	0.274792391720204	0	3.01137467896886e-08	0	8.85113339422453e-18
STMN2	2	0	0	1	1	0	0	0.265619345178584	0.256543057120944	0	0	1.6440065840349e-12	2.69358803340173e-22
SUN2	2	1	1	0	0	0.340054368079513	0.262500734333451	0	0	2.11210486346923e-12	2.99156392990768e-07	0	0
SYN1	2	1	1	0	0	0.275070235026496	0.275174422811469	0	0	5.41387513544749e-15	1.52614589152476e-17	0	0
SYNPO	2	1	1	0	0	0.336899838717727	0.517140616375796	0	0	6.92005897208697e-10	9.00064232911427e-34	0	0
SYT17	2	0	1	0	1	0	0.338283184492975	0	0.273393974057785	0	2.4684024199621e-16	0	4.21835223932429e-19
TBCB	2	1	1	0	0	0.283796202688918	0.282386939956689	0	0	2.67459625748772e-08	6.0567364527736e-10	0	0
TCF4	2	1	1	0	0	0.274952074028524	0.284027816804169	0	0	2.14592160462119e-06	1.67277224599443e-09	0	0
TEF	2	1	1	0	0	0.26034072684746	0.296873615073707	0	0	1.13728127873947e-06	7.29955990460301e-11	0	0
TENM3	2	1	0	1	0	0.269848145048231	0	0.251775363988537	0	8.74076305323232e-09	0	5.09552032449434e-13	0
THRA	2	1	1	0	0	0.436287935208685	0.422772618766553	0	0	1.81334519805245e-23	2.06602959095707e-27	0	0
TIMP1	2	0	1	0	1	0	0.325924538323745	0	0.318433866594587	0	7.37561586886871e-15	0	4.54292782303169e-24
TKT	2	0	1	0	1	0	0.300118099666568	0	0.309174964919941	0	5.18834110670745e-11	0	6.08866817750379e-23
TMBIM1	2	0	1	0	1	0	0.407680769237962	0	0.295853123393765	0	7.52570944462703e-21	0	2.15927696682695e-19
TMBIM6	2	1	1	0	0	0.333973977890914	0.292061433922787	0	0	6.70763199040788e-13	8.70679187625262e-13	0	0
TMEM130	2	0	0	1	1	0	0	0.309934942249641	0.282583174166094	0	0	1.75602952150844e-21	2.20634432534384e-24
TMEM132A	2	1	1	0	0	0.302753960529699	0.353776279654581	0	0	6.0965267743493e-09	4.17940642714597e-15	0	0
TMEM151A	2	0	1	0	1	0	0.294373191887604	0	0.28432824035335	0	8.62071773101449e-12	0	1.43169906553657e-21
TMEM47	2	1	1	0	0	0.353516434123152	0.275806277971587	0	0	2.76695363023768e-16	5.06043040568011e-10	0	0
TPI1	2	0	1	0	1	0	0.286320264306545	0	0.37282212999552	0	2.92611913149233e-27	0	2.69278769157868e-67
TRIL	2	1	0	1	0	0.393872119471983	0	0.425134434040058	0	2.50477502535413e-19	0	2.75654945542073e-38	0
TSC22D4	2	1	1	0	0	0.487256444083093	0.51978983207759	0	0	5.81866807022586e-23	1.34709470431979e-34	0	0
TSPAN3	2	1	1	0	0	0.43667761770246	0.39707123580774	0	0	7.03826207185429e-30	5.65053251796357e-26	0	0
TSPYL4	2	1	1	0	0	0.293764203562507	0.300316195702679	0	0	8.0820511043823e-09	3.07187374853157e-11	0	0
TTYH2	2	1	0	1	0	0.28875172868024	0	0.282703018267984	0	4.99582599391477e-10	0	8.65263060763892e-17	0
TUBA1B	2	0	0	1	1	0	0	0.469973118650929	0.348466876235272	0	0	7.58496898863178e-94	1.68453944137381e-88
TUBB	2	1	0	1	0	0.322565649308687	0	0.515440708654801	0	5.99682030097272e-19	0	7.37867465255165e-61	0
TUBB2A	2	0	0	1	1	0	0	0.443655982673978	0.348173707671429	0	0	1.07834412006506e-53	1.90408950660084e-49
TUBB4A	2	1	0	1	0	0.339770744613015	0	0.274165831839303	0	4.93977009395871e-23	0	1.17324694305168e-21	0
TYROBP	2	0	1	0	1	0	0.327060718152785	0	0.289575690555435	0	1.09221647492886e-16	0	4.40688672222321e-21
UBA52	2	1	1	0	0	0.345034289724239	0.448150986097551	0	0	2.16774256121727e-20	1.79185632066258e-42	0	0
UBTF	2	1	1	0	0	0.265911771896915	0.326640133533973	0	0	9.13694818324006e-09	4.90597257359467e-15	0	0
UCHL1	2	0	0	1	1	0	0	0.257128058959904	0.312458766783438	0	0	7.74522847253364e-34	9.14096726612978e-70
USP22	2	1	1	0	0	0.334486351730068	0.262857374296894	0	0	3.41788348265846e-16	1.60733586630015e-10	0	0
VSIG4	2	0	1	0	1	0	0.379724803522283	0	0.473397369515612	0	1.32472545863277e-22	0	6.14067645970284e-65
XPO1	2	0	1	0	1	0	0.31851107503047	0	0.289358906520133	0	2.26793429214157e-15	0	3.41929192402308e-23
YBX1	2	1	1	0	0	0.268851416515369	0.323629909346192	0	0	3.80026122429328e-09	3.05077526792262e-13	0	0
YWHAB	2	1	0	1	0	0.265479078073888	0	0.281849187471637	0	4.84476598206201e-11	0	1.78418027275455e-19	0
YWHAE	2	1	1	0	0	0.425538404053092	0.331301369810255	0	0	1.01650379964177e-38	1.04045603093205e-28	0	0
YWHAH	2	0	0	1	1	0	0	0.376462569757266	0.434307217841162	0	0	1.07630701841898e-54	3.228823553928e-92
ZBTB18	2	1	1	0	0	0.305276029962409	0.387990143109186	0	0	3.19127404755639e-09	4.50485545575245e-17	0	0
ZCCHC12	2	0	1	0	1	0	0.293991491220736	0	0.250031139710187	0	1.25987680375295e-11	0	1.74698620085514e-14
ZNF706	2	1	1	0	0	0.303282921134469	0.286921201051956	0	0	7.42260980105667e-10	9.71939043748864e-11	0	0
A2M	1	1	0	0	0	0.326064858557285	0	0	0	2.34346794882052e-07	0	0	0
ABI1	1	1	0	0	0	0.267458194616324	0	0	0	2.89537947408372e-09	0	0	0
ACADVL	1	1	0	0	0	0.25116252307661	0	0	0	1.71931501457573e-06	0	0	0
ACIN1	1	1	0	0	0	0.25728728936057	0	0	0	1.73952464656565e-09	0	0	0
ACO2	1	1	0	0	0	0.255121810971668	0	0	0	5.94111723550869e-08	0	0	0
ACOT7	1	0	0	0	1	0	0	0	0.319739175529941	0	0	0	4.19743005123588e-25
ACSBG1	1	1	0	0	0	0.294532091595739	0	0	0	5.06644137261954e-09	0	0	0
ACSL4	1	0	1	0	0	0	0.257995462450386	0	0	0	2.38530634942566e-09	0	0
ADCYAP1R1	1	1	0	0	0	0.302678764078936	0	0	0	9.80541256597053e-10	0	0	0
ADGRL3	1	1	0	0	0	0.267734475872398	0	0	0	4.04931400801483e-08	0	0	0
ADIPOR1	1	0	1	0	0	0	0.286485566107144	0	0	0	3.00651252022963e-09	0	0
AEBP1	1	0	0	0	1	0	0	0	0.316614946729888	0	0	0	5.07497151697323e-36
AGAP3	1	0	1	0	0	0	0.252054545472866	0	0	0	1.69911390867254e-09	0	0
AGPAT1	1	0	1	0	0	0	0.290525572599632	0	0	0	3.62877648025432e-11	0	0
AHCYL1	1	0	1	0	0	0	0.45701942809635	0	0	0	2.30485601942855e-29	0	0
AIF1L	1	1	0	0	0	0.272137596868305	0	0	0	8.46241440546895e-10	0	0	0
AKAP11	1	1	0	0	0	0.2568437495111	0	0	0	4.46934713596365e-06	0	0	0
AL627171.2	1	0	1	0	0	0	0.289383025226799	0	0	0	9.44080985732408e-10	0	0
ALDH6A1	1	1	0	0	0	0.315497866481761	0	0	0	6.06558698278789e-09	0	0	0
AMD1	1	0	1	0	0	0	0.279179619129335	0	0	0	7.19391302915963e-10	0	0
ANKS1B	1	1	0	0	0	0.250064285904375	0	0	0	0.000421396003790707	0	0	0
ANOS1	1	0	0	1	0	0	0	0.256108611705102	0	0	0	3.01714314227452e-20	0
ANP32B	1	1	0	0	0	0.284222458850847	0	0	0	1.70941617008675e-09	0	0	0
ANXA5	1	0	1	0	0	0	0.294338850886886	0	0	0	3.77246838699687e-13	0	0
AP2B1	1	0	1	0	0	0	0.293532392948847	0	0	0	2.18834034127437e-11	0	0
AP3S1	1	0	1	0	0	0	0.250644202150336	0	0	0	4.96382232468895e-06	0	0
APLN	1	1	0	0	0	0.259323432761763	0	0	0	2.29519035771803e-12	0	0	0
APOC2	1	0	1	0	0	0	0.307914766693425	0	0	0	1.36301839166116e-15	0	0
ARHGAP35	1	1	0	0	0	0.296655112389093	0	0	0	1.59545675563781e-07	0	0	0
ARHGDIA	1	0	1	0	0	0	0.280684601209413	0	0	0	3.22480061787264e-10	0	0
ARHGDIB	1	0	1	0	0	0	0.268179624564145	0	0	0	6.44320106070168e-12	0	0
ARHGDIG	1	1	0	0	0	0.267245709603307	0	0	0	1.12638577023605e-07	0	0	0
ARNT2	1	0	1	0	0	0	0.28779960198121	0	0	0	7.29117041218402e-12	0	0
ARPC1B	1	0	1	0	0	0	0.261518108857986	0	0	0	8.89603358088386e-11	0	0
ASRGL1	1	1	0	0	0	0.285439404777186	0	0	0	1.49988285876719e-10	0	0	0
ASTN1	1	1	0	0	0	0.279275024439569	0	0	0	9.05538343130321e-07	0	0	0
ATF4	1	0	1	0	0	0	0.308872368462925	0	0	0	1.56132236808341e-11	0	0
ATG13	1	1	0	0	0	0.269077458988522	0	0	0	6.23433567972848e-07	0	0	0
ATN1	1	1	0	0	0	0.295098502077405	0	0	0	2.32508281102632e-08	0	0	0
ATP6V0C	1	0	0	0	1	0	0	0	0.297546624028615	0	0	0	3.5046232210396e-49
ATP6V0E1	1	0	1	0	0	0	0.252391578756503	0	0	0	2.63936917124639e-06	0	0
ATP6V1C1	1	0	0	0	1	0	0	0	0.263217399188346	0	0	0	4.52145983132312e-16
ATP6V1H	1	0	1	0	0	0	0.253191666081432	0	0	0	7.16996775054105e-09	0	0
B3GAT1	1	1	0	0	0	0.269054766528091	0	0	0	4.62205836684635e-07	0	0	0
B4GALNT4	1	1	0	0	0	0.255191053413655	0	0	0	5.70150720771116e-05	0	0	0
BANF1	1	0	1	0	0	0	0.267556037358655	0	0	0	1.01666837064495e-09	0	0
BCAP31	1	0	1	0	0	0	0.327710669429321	0	0	0	2.7160771905161e-14	0	0
BCAS1	1	1	0	0	0	0.393207004715172	0	0	0	8.13443472537831e-14	0	0	0
BOK	1	0	0	1	0	0	0	0.288104786973404	0	0	0	1.01137905224224e-19	0
BRI3	1	0	1	0	0	0	0.291186220581474	0	0	0	1.05946049031175e-10	0	0
BTBD2	1	0	1	0	0	0	0.250333800809435	0	0	0	3.30442121559195e-07	0	0
C1orf115	1	0	1	0	0	0	0.259303454798324	0	0	0	2.15975001696509e-07	0	0
C1QTNF4	1	0	1	0	0	0	0.32468639135968	0	0	0	2.45572749361328e-13	0	0
C2orf72	1	1	0	0	0	0.263268986626548	0	0	0	1.09752983169865e-08	0	0	0
C7orf50	1	0	1	0	0	0	0.256238553912254	0	0	0	3.27995388394311e-09	0	0
CACNB1	1	0	1	0	0	0	0.258643717686643	0	0	0	8.25527985692073e-09	0	0
CACYBP	1	0	0	0	1	0	0	0	0.2501607625388	0	0	0	6.92229060576613e-17
CADM1	1	1	0	0	0	0.252294505371831	0	0	0	1.93130428456871e-05	0	0	0
CADM3	1	0	1	0	0	0	0.315614037375669	0	0	0	3.69026180733407e-14	0	0
CAMK2B	1	1	0	0	0	0.414583124550597	0	0	0	3.23996585334224e-27	0	0	0
CAMK2N1	1	0	1	0	0	0	0.304201119531538	0	0	0	8.06830855201352e-24	0	0
CAMKV	1	1	0	0	0	0.299928193417805	0	0	0	5.86707594543358e-10	0	0	0
CAP1	1	0	1	0	0	0	0.253813531624882	0	0	0	1.47769794156124e-05	0	0
CAP2	1	0	1	0	0	0	0.261766374448271	0	0	0	1.72726971101719e-07	0	0
CAPZA2	1	1	0	0	0	0.252518001166251	0	0	0	0.000141888468300723	0	0	0
CARNS1	1	0	0	1	0	0	0	0.312149797399594	0	0	0	5.03264971135701e-20	0
CASC4	1	1	0	0	0	0.290908380209368	0	0	0	1.29263644996515e-08	0	0	0
CASD1	1	1	0	0	0	0.256323923929752	0	0	0	2.46019983270273e-06	0	0	0
CCDC88A	1	1	0	0	0	0.285492408076654	0	0	0	1.18567523461605e-09	0	0	0
CD44	1	0	0	0	1	0	0	0	0.308213497773337	0	0	0	1.75804497848592e-36
CD68	1	0	1	0	0	0	0.25977617804195	0	0	0	1.73014623045405e-12	0	0
CD9	1	0	0	1	0	0	0	0.261367994183605	0	0	0	6.74584504212768e-14	0
CD99	1	0	1	0	0	0	0.439841733326068	0	0	0	2.22540318113569e-24	0	0
CDC42	1	1	0	0	0	0.274110307571217	0	0	0	1.58414099957962e-08	0	0	0
CDC42BPB	1	1	0	0	0	0.311480811490571	0	0	0	3.54036872564987e-12	0	0	0
CDC42EP4	1	1	0	0	0	0.297374291072002	0	0	0	1.55947285633574e-11	0	0	0
CDH8	1	0	1	0	0	0	0.252908856512782	0	0	0	3.45249009529665e-08	0	0
CDHR1	1	0	0	1	0	0	0	0.272843316419767	0	0	0	1.82307683876673e-23	0
CDK17	1	1	0	0	0	0.281916536829417	0	0	0	7.46593867394097e-09	0	0	0
CDK2AP1	1	1	0	0	0	0.383500119540224	0	0	0	2.03455955821053e-16	0	0	0
CDK2AP2	1	0	1	0	0	0	0.276972376512124	0	0	0	4.97746458705823e-09	0	0
CDS2	1	1	0	0	0	0.276437653889635	0	0	0	3.34124108415989e-07	0	0	0
CELF4	1	1	0	0	0	0.287008973929621	0	0	0	1.3324145920942e-08	0	0	0
CENPB	1	1	0	0	0	0.266794964662255	0	0	0	7.48223213645045e-09	0	0	0
CERS1	1	0	1	0	0	0	0.262377316096941	0	0	0	6.67758772674941e-09	0	0
CHD3	1	1	0	0	0	0.281158629508897	0	0	0	2.9097658423681e-08	0	0	0
CHD4	1	1	0	0	0	0.255444756235253	0	0	0	7.9011559284053e-07	0	0	0
CHP1	1	0	1	0	0	0	0.252164614787679	0	0	0	6.01047209022102e-08	0	0
CHRM1	1	0	1	0	0	0	0.270532796404124	0	0	0	3.17152839457037e-08	0	0
CHST1	1	1	0	0	0	0.287725131103543	0	0	0	4.72726678255575e-09	0	0	0
CLDN10	1	1	0	0	0	0.281238844485077	0	0	0	5.69389613318469e-09	0	0	0
CLIC4	1	0	0	0	1	0	0	0	0.28119860450377	0	0	0	2.0325789491463e-26
CLIP3	1	0	1	0	0	0	0.350026895609008	0	0	0	6.29914341316743e-22	0	0
CLPTM1	1	0	1	0	0	0	0.283702941984054	0	0	0	3.89932757501322e-10	0	0
CLSTN1	1	0	0	0	1	0	0	0	0.27831824267344	0	0	0	2.20286758106533e-38
CMPK1	1	1	0	0	0	0.274385901550508	0	0	0	3.61549606468824e-09	0	0	0
CNDP1	1	0	0	1	0	0	0	0.269956185546902	0	0	0	2.78066733573529e-17	0
COMT	1	1	0	0	0	0.273244131683368	0	0	0	3.38951745475999e-08	0	0	0
COPS8	1	0	1	0	0	0	0.28871878770163	0	0	0	3.16701597532751e-11	0	0
CPNE3	1	0	1	0	0	0	0.252366063670707	0	0	0	1.1144297749217e-10	0	0
CPSF1	1	1	0	0	0	0.254935308280552	0	0	0	6.06494661122459e-09	0	0	0
CRELD1	1	0	0	0	1	0	0	0	0.253655079593595	0	0	0	1.53271012382979e-13
CRIP2	1	0	1	0	0	0	0.254063070602918	0	0	0	6.92739814425599e-08	0	0
CRTAP	1	1	0	0	0	0.263321354985598	0	0	0	5.98774174045456e-09	0	0	0
CSPG5	1	1	0	0	0	0.37872031445138	0	0	0	1.13019174171082e-16	0	0	0
CSRNP3	1	1	0	0	0	0.271423963725442	0	0	0	1.09724335736936e-08	0	0	0
CSTB	1	0	1	0	0	0	0.351874858798697	0	0	0	5.2672266199595e-15	0	0
CTBP1	1	1	0	0	0	0.259528708938448	0	0	0	1.62520522781216e-06	0	0	0
CTNNB1	1	0	1	0	0	0	0.290213291662865	0	0	0	1.13705892450738e-10	0	0
CYB5R3	1	1	0	0	0	0.289896645586818	0	0	0	7.57173949679566e-08	0	0	0
CYFIP1	1	1	0	0	0	0.263787520436541	0	0	0	6.61165854684561e-10	0	0	0
DBNDD2	1	0	0	1	0	0	0	0.259663780601225	0	0	0	4.13651401455537e-09	0
DCLK2	1	1	0	0	0	0.263400002656043	0	0	0	2.68903128684318e-06	0	0	0
DCN	1	1	0	0	0	0.267996697591103	0	0	0	1.81273855796589e-09	0	0	0
DCXR	1	1	0	0	0	0.282012942144339	0	0	0	7.13442387731983e-08	0	0	0
DDX5	1	1	0	0	0	0.300346061461159	0	0	0	4.14992311827893e-13	0	0	0
DDX6	1	1	0	0	0	0.258875954357645	0	0	0	3.95094631186041e-06	0	0	0
DGKG	1	1	0	0	0	0.265209070164873	0	0	0	7.46120259675752e-11	0	0	0
DGKZ	1	1	0	0	0	0.29948063518473	0	0	0	3.3135985045634e-11	0	0	0
DHCR24	1	0	0	0	1	0	0	0	0.30051435826237	0	0	0	1.78343747599888e-21
DHRS3	1	0	1	0	0	0	0.255599901853994	0	0	0	3.06894158311145e-10	0	0
DKK3	1	1	0	0	0	0.335996810881171	0	0	0	1.26417687287106e-30	0	0	0
DLG2	1	1	0	0	0	0.341980560035179	0	0	0	2.08381507152454e-13	0	0	0
DLGAP4	1	0	1	0	0	0	0.260314867038187	0	0	0	7.31101855592682e-09	0	0
DNAJB4	1	0	1	0	0	0	0.283976543955695	0	0	0	8.23187203414418e-13	0	0
DPP6	1	0	1	0	0	0	0.277680973604081	0	0	0	5.49630721372353e-10	0	0
DPYSL2	1	0	0	0	1	0	0	0	0.298020433237046	0	0	0	7.28947399264566e-49
DST	1	1	0	0	0	0.263742535701748	0	0	0	1.38431404323258e-05	0	0	0
DYNLL1	1	0	0	0	1	0	0	0	0.250278931936597	0	0	0	6.5846510408189e-32
DYNLL2	1	0	1	0	0	0	0.381541306124783	0	0	0	7.28692419566578e-25	0	0
ECH1	1	1	0	0	0	0.259648685297349	0	0	0	2.69248501101584e-05	0	0	0
EEF2	1	0	1	0	0	0	0.277588081626665	0	0	0	3.31880912916174e-17	0	0
EFR3B	1	0	1	0	0	0	0.274385482588334	0	0	0	2.90523801469125e-11	0	0
EGLN1	1	1	0	0	0	0.250796848335754	0	0	0	3.45348970992879e-07	0	0	0
EI24	1	0	1	0	0	0	0.265272730842813	0	0	0	4.21944749297123e-08	0	0
EIF1	1	0	1	0	0	0	0.293711504168308	0	0	0	7.24253968555077e-29	0	0
EIF4G2	1	0	1	0	0	0	0.26138363699602	0	0	0	1.89086955499463e-11	0	0
ELAVL3	1	0	1	0	0	0	0.273145282385466	0	0	0	2.27244198521318e-09	0	0
ELAVL4	1	0	1	0	0	0	0.266682938810965	0	0	0	6.01174406641914e-09	0	0
EMC10	1	1	0	0	0	0.269750101026387	0	0	0	2.35480560774094e-07	0	0	0
EPHX1	1	0	1	0	0	0	0.317414091755542	0	0	0	1.82006641923395e-12	0	0
ERH	1	1	0	0	0	0.314565397439061	0	0	0	4.16868140053345e-12	0	0	0
EZR	1	1	0	0	0	0.447939340742259	0	0	0	3.80716117637416e-20	0	0	0
FAAH	1	1	0	0	0	0.252588750043142	0	0	0	1.30913463208433e-07	0	0	0
FABP5	1	0	0	0	1	0	0	0	0.26394579255295	0	0	0	3.25404012910117e-18
FADS2	1	1	0	0	0	0.302407917861718	0	0	0	9.23074731070904e-12	0	0	0
FAM168A	1	1	0	0	0	0.266038747962098	0	0	0	1.94150937283992e-06	0	0	0
FAM49A	1	0	1	0	0	0	0.253087145569186	0	0	0	2.39846841940653e-07	0	0
FAU	1	0	1	0	0	0	0.325734447745012	0	0	0	9.07588803498435e-23	0	0
FBXO2	1	1	0	0	0	0.330235447185556	0	0	0	3.64339532482201e-12	0	0	0
FBXO44	1	0	1	0	0	0	0.261200497294255	0	0	0	1.32588798933099e-09	0	0
FEZ1	1	1	0	0	0	0.294499645658779	0	0	0	1.08623335898096e-07	0	0	0
FMNL2	1	1	0	0	0	0.363784827088657	0	0	0	2.50468011691543e-14	0	0	0
FOXG1	1	1	0	0	0	0.260961652045926	0	0	0	7.12298304092154e-07	0	0	0
FRRS1L	1	1	0	0	0	0.255721780991165	0	0	0	1.67720347573608e-05	0	0	0
FTH1	1	0	1	0	0	0	0.304034968501067	0	0	0	6.86456420017757e-75	0	0
FUS	1	1	0	0	0	0.282703262218409	0	0	0	2.42046854485424e-08	0	0	0
FXYD1	1	0	1	0	0	0	0.320354547546649	0	0	0	2.61276893319746e-11	0	0
GABBR1	1	0	0	1	0	0	0	0.293667893785766	0	0	0	2.51968448805141e-15	0
GALNT16	1	1	0	0	0	0.262023945558286	0	0	0	1.78386619877223e-07	0	0	0
GAPDH	1	0	0	0	1	0	0	0	0.310608839538638	0	0	0	5.41570358351548e-102
GIT1	1	1	0	0	0	0.362792451757054	0	0	0	2.5502069041773e-14	0	0	0
GMFB	1	1	0	0	0	0.298854294588611	0	0	0	8.92976477969809e-07	0	0	0
GNA12	1	0	1	0	0	0	0.302233923075284	0	0	0	1.90700533399502e-14	0	0
GNAI2	1	0	1	0	0	0	0.270834555445209	0	0	0	6.76430341194445e-10	0	0
GPR37	1	0	0	1	0	0	0	0.297991710783074	0	0	0	3.06210806197159e-22	0
GRIA2	1	1	0	0	0	0.259951394547428	0	0	0	1.54594210082365e-07	0	0	0
GRIA3	1	1	0	0	0	0.272199745165462	0	0	0	5.81159688957567e-06	0	0	0
GRIN1	1	1	0	0	0	0.271950257110157	0	0	0	4.48226402678751e-16	0	0	0
GRK3	1	1	0	0	0	0.27747421279107	0	0	0	7.1393471018936e-08	0	0	0
GSTP1	1	0	1	0	0	0	0.289288608320549	0	0	0	1.46760422116426e-10	0	0
GUK1	1	1	0	0	0	0.297608883423317	0	0	0	1.7512082345748e-13	0	0	0
HDLBP	1	0	1	0	0	0	0.257563830563304	0	0	0	2.29774194884657e-08	0	0
HIP1R	1	1	0	0	0	0.251710684073245	0	0	0	0.000117513797883929	0	0	0
HLA-DPA1	1	0	1	0	0	0	0.281330891301741	0	0	0	2.39319584702635e-11	0	0
HMGB1	1	1	0	0	0	0.321277460477363	0	0	0	9.80922213797773e-13	0	0	0
HMGCR	1	0	0	1	0	0	0	0.270484732973757	0	0	0	6.83209959362534e-13	0
HMGN2	1	0	1	0	0	0	0.290023682955759	0	0	0	7.87526331386811e-11	0	0
HNRNPA1	1	0	1	0	0	0	0.253294137983261	0	0	0	5.72190673391805e-08	0	0
HNRNPA2B1	1	0	1	0	0	0	0.268897271092594	0	0	0	3.26879070707182e-12	0	0
HNRNPC	1	0	1	0	0	0	0.290123058392775	0	0	0	6.03854783050184e-13	0	0
HNRNPL	1	1	0	0	0	0.271105093434618	0	0	0	1.1362143559162e-07	0	0	0
HNRNPU	1	1	0	0	0	0.265204549665538	0	0	0	6.09439247906339e-07	0	0	0
HOPX	1	0	1	0	0	0	0.526904625638942	0	0	0	3.40534872143775e-39	0	0
HP1BP3	1	1	0	0	0	0.277116516352297	0	0	0	1.7943949661743e-06	0	0	0
HPCA	1	0	1	0	0	0	0.274058455888968	0	0	0	1.30428681470424e-09	0	0
HRAS	1	0	1	0	0	0	0.276898645605323	0	0	0	1.30517139705159e-09	0	0
HSPA4	1	0	1	0	0	0	0.278912362142504	0	0	0	2.68964728600225e-09	0	0
HSPE1	1	0	1	0	0	0	0.364844372472331	0	0	0	7.14423785676866e-19	0	0
HTRA1	1	1	0	0	0	0.363841027035595	0	0	0	5.11323065647452e-14	0	0	0
ID2	1	1	0	0	0	0.312126510779562	0	0	0	2.28991627105617e-10	0	0	0
IGFBP7	1	0	1	0	0	0	0.312881363484829	0	0	0	2.25636719492925e-11	0	0
IGSF21	1	1	0	0	0	0.327773941142765	0	0	0	1.59548393805527e-11	0	0	0
IPO13	1	1	0	0	0	0.252599804103022	0	0	0	1.46449538194242e-06	0	0	0
IPO5	1	0	1	0	0	0	0.266763743626976	0	0	0	1.41039305867704e-09	0	0
IQSEC2	1	0	1	0	0	0	0.259737099754767	0	0	0	3.36558131114412e-08	0	0
ITGB8	1	1	0	0	0	0.254658893380029	0	0	0	2.29305595663386e-07	0	0	0
ITPRID2	1	1	0	0	0	0.258167285435476	0	0	0	1.69747364234692e-07	0	0	0
JPH4	1	1	0	0	0	0.377825477639589	0	0	0	6.57436113737557e-17	0	0	0
JPT1	1	0	1	0	0	0	0.252223785801789	0	0	0	6.68982279940391e-07	0	0
JUN	1	0	1	0	0	0	0.282753075455689	0	0	0	4.93183813333508e-10	0	0
KBTBD11	1	0	1	0	0	0	0.255563066501874	0	0	0	5.87310309723771e-07	0	0
KCNG1	1	0	1	0	0	0	0.293648783010873	0	0	0	6.76715284289959e-16	0	0
KCNIP2	1	1	0	0	0	0.259941604910412	0	0	0	7.12602041065596e-07	0	0	0
KCNJ10	1	1	0	0	0	0.429165663753103	0	0	0	2.3999472372293e-20	0	0	0
KCNQ2	1	0	1	0	0	0	0.344977586277213	0	0	0	1.30743452668362e-17	0	0
KCTD16	1	1	0	0	0	0.30846845987045	0	0	0	1.93311272687129e-12	0	0	0
KDM5B	1	0	1	0	0	0	0.254383152891973	0	0	0	4.10772429360273e-10	0	0
KHDRBS1	1	1	0	0	0	0.25036558179064	0	0	0	6.82453287951984e-05	0	0	0
KIF1B	1	1	0	0	0	0.299149441768601	0	0	0	1.95306902547483e-10	0	0	0
KIF5B	1	1	0	0	0	0.315638228303576	0	0	0	1.64684058100403e-10	0	0	0
KLF2	1	1	0	0	0	0.297819089565403	0	0	0	3.29137736318228e-12	0	0	0
KLK7	1	0	0	0	1	0	0	0	0.257534519609212	0	0	0	4.83221357096222e-20
KTN1	1	1	0	0	0	0.268639529662155	0	0	0	1.07650323412794e-07	0	0	0
LAMP1	1	1	0	0	0	0.255225626180689	0	0	0	0.000170593806591093	0	0	0
LARGE1	1	0	0	1	0	0	0	0.263502859659841	0	0	0	8.2405541886325e-12	0
LDHA	1	0	0	0	1	0	0	0	0.390970585296313	0	0	0	3.53448059103039e-41
LGALS3BP	1	0	1	0	0	0	0.253275274626274	0	0	0	1.97972537637628e-10	0	0
LINC00844	1	1	0	0	0	0.341756118332969	0	0	0	2.77441026512657e-07	0	0	0
LMBRD1	1	1	0	0	0	0.259281965499218	0	0	0	6.09363293690742e-06	0	0	0
LMBRD2	1	1	0	0	0	0.25003318934645	0	0	0	1.97633041757785e-05	0	0	0
LONRF2	1	1	0	0	0	0.274812759455994	0	0	0	1.12169916106631e-06	0	0	0
LPAR1	1	1	0	0	0	0.271236454599193	0	0	0	2.7443179800631e-09	0	0	0
LRP1	1	1	0	0	0	0.265820192612086	0	0	0	4.70501796930742e-05	0	0	0
LRRC4B	1	1	0	0	0	0.307500742504198	0	0	0	1.89542986080495e-10	0	0	0
MAP1S	1	0	1	0	0	0	0.258292355553586	0	0	0	2.47869664013675e-08	0	0
MAP3K10	1	0	1	0	0	0	0.258238509692103	0	0	0	1.94669285126144e-09	0	0
MAP7	1	1	0	0	0	0.271236454599193	0	0	0	1.34551296315555e-08	0	0	0
MAPT	1	0	1	0	0	0	0.264117712034379	0	0	0	2.48715855371015e-09	0	0
MARCKS	1	1	0	0	0	0.329925139315873	0	0	0	1.02079762089047e-12	0	0	0
MAT2A	1	1	0	0	0	0.28657173899633	0	0	0	8.38789121097794e-08	0	0	0
MCRIP1	1	0	1	0	0	0	0.258096351176674	0	0	0	1.9155473226678e-08	0	0
MED16	1	1	0	0	0	0.258769634615419	0	0	0	1.817766076941e-07	0	0	0
MED25	1	1	0	0	0	0.26075592303362	0	0	0	1.65486569519327e-08	0	0	0
MEIS3	1	1	0	0	0	0.272942820979536	0	0	0	3.51590708662057e-07	0	0	0
MFSD4A	1	0	1	0	0	0	0.281332547247538	0	0	0	2.90112491784623e-09	0	0
MID1IP1	1	1	0	0	0	0.379814379981751	0	0	0	5.04716725213478e-13	0	0	0
MOB1B	1	0	1	0	0	0	0.266139426453584	0	0	0	2.32450910469109e-10	0	0
MPDZ	1	0	1	0	0	0	0.279424387212799	0	0	0	3.33752527518234e-11	0	0
MRAS	1	1	0	0	0	0.296604242315164	0	0	0	1.64275123289317e-07	0	0	0
MRPL41	1	1	0	0	0	0.276353879262665	0	0	0	7.61721863000896e-07	0	0	0
MRTFB	1	0	1	0	0	0	0.271434336982364	0	0	0	1.52134456465444e-10	0	0
MRVI1	1	0	0	0	1	0	0	0	0.273264048171846	0	0	0	1.81857161691298e-20
MSMO1	1	0	0	1	0	0	0	0.258349935920646	0	0	0	6.89731245663582e-12	0
MTSS2	1	1	0	0	0	0.296946624759695	0	0	0	1.28780194748464e-09	0	0	0
MYL6	1	0	1	0	0	0	0.340087709468489	0	0	0	1.3003551523817e-22	0	0
MYO10	1	1	0	0	0	0.372299634217855	0	0	0	1.9798490574875e-17	0	0	0
NBL1	1	0	1	0	0	0	0.289476645402016	0	0	0	1.81786738010411e-11	0	0
NCKAP1	1	1	0	0	0	0.254586171826597	0	0	0	8.09429311512836e-06	0	0	0
NDRG1	1	0	1	0	0	0	0.318872800858558	0	0	0	1.53990896199388e-12	0	0
NDUFAF8	1	0	1	0	0	0	0.307903328775584	0	0	0	3.33099449257394e-11	0	0
NEBL	1	1	0	0	0	0.28543384271711	0	0	0	2.04634637917446e-08	0	0	0
NECAB1	1	1	0	0	0	0.318889639173328	0	0	0	5.70053430501741e-12	0	0	0
NEUROD6	1	0	1	0	0	0	0.305649084827489	0	0	0	5.87995802612234e-12	0	0
NFIA	1	1	0	0	0	0.309368167088714	0	0	0	7.55752851597044e-11	0	0	0
NFIX	1	1	0	0	0	0.377446485132881	0	0	0	5.63238668412858e-16	0	0	0
NIPSNAP2	1	1	0	0	0	0.258855394231268	0	0	0	8.14414803589222e-07	0	0	0
NLGN3	1	1	0	0	0	0.255183008609459	0	0	0	1.24178208026941e-07	0	0	0
NOMO1	1	0	0	1	0	0	0	0.257925217290349	0	0	0	1.35984943371344e-12	0
NPC2	1	0	1	0	0	0	0.273015918083998	0	0	0	2.96959946277175e-09	0	0
NPDC1	1	0	1	0	0	0	0.269324366013947	0	0	0	5.57521549837749e-11	0	0
NQO1	1	0	1	0	0	0	0.374276043612539	0	0	0	3.48309396657561e-17	0	0
NR2F1	1	1	0	0	0	0.329789075454561	0	0	0	2.5657343436358e-11	0	0	0
NSF	1	0	0	0	1	0	0	0	0.261263682918813	0	0	0	5.96023035449852e-21
NTM	1	0	1	0	0	0	0.268521875437374	0	0	0	1.3511635476615e-08	0	0
NTRK3	1	0	1	0	0	0	0.2687954705117	0	0	0	3.22936072506583e-09	0	0
NUCKS1	1	1	0	0	0	0.301398821002857	0	0	0	1.17478703112594e-10	0	0	0
NUDT21	1	1	0	0	0	0.254328684690832	0	0	0	6.45634206265191e-07	0	0	0
NUDT4	1	0	0	0	1	0	0	0	0.312438629934907	0	0	0	8.10446186660609e-20
NUMA1	1	1	0	0	0	0.250439655864748	0	0	0	8.03907983283375e-06	0	0	0
NUTF2	1	1	0	0	0	0.263400002656043	0	0	0	1.87612428224016e-08	0	0	0
OAF	1	0	1	0	0	0	0.265121014551985	0	0	0	2.20101726090604e-10	0	0
OLFM1	1	0	1	0	0	0	0.250097707056578	0	0	0	2.7909035956439e-18	0	0
OLFM2	1	1	0	0	0	0.332815900170286	0	0	0	1.54090942378684e-13	0	0	0
OST4	1	0	1	0	0	0	0.310525453270524	0	0	0	3.18840356794987e-12	0	0
P4HB	1	0	1	0	0	0	0.253259918478824	0	0	0	1.29462986880305e-08	0	0
PABPN1	1	1	0	0	0	0.324218497667641	0	0	0	7.26715937225038e-09	0	0	0
PAK1	1	0	0	0	1	0	0	0	0.323123236926302	0	0	0	1.25738623803468e-24
PAK3	1	1	0	0	0	0.305383169654164	0	0	0	7.25128780670293e-10	0	0	0
PAPOLA	1	0	1	0	0	0	0.295009578259662	0	0	0	2.76709500717402e-11	0	0
PAQR6	1	1	0	0	0	0.283585485478101	0	0	0	1.14643889903074e-05	0	0	0
PARM1	1	0	1	0	0	0	0.265947447340322	0	0	0	1.31836828022208e-09	0	0
PCSK1N	1	1	0	0	0	0.288614225806139	0	0	0	2.71829579252438e-20	0	0	0
PDCD5	1	0	1	0	0	0	0.262426197394151	0	0	0	6.00703182791052e-09	0	0
PDE4DIP	1	1	0	0	0	0.3446010704652	0	0	0	1.69896032133882e-14	0	0	0
PDLIM5	1	1	0	0	0	0.250678815935723	0	0	0	3.46390178404253e-09	0	0	0
PFN1	1	0	1	0	0	0	0.320287533149698	0	0	0	1.01742309095115e-12	0	0
PHGDH	1	1	0	0	0	0.284265312932705	0	0	0	2.87832076932276e-07	0	0	0
PHLPP1	1	1	0	0	0	0.301766768501757	0	0	0	2.44301909260131e-10	0	0	0
PHYHIP	1	0	1	0	0	0	0.341771670843688	0	0	0	1.21735033635939e-31	0	0
PIP5K1C	1	0	1	0	0	0	0.290963027316412	0	0	0	1.3806120162922e-11	0	0
PKIA	1	0	1	0	0	0	0.350069267502889	0	0	0	4.46518306415982e-16	0	0
PLEC	1	1	0	0	0	0.364202423985236	0	0	0	2.40111662406505e-13	0	0	0
PNMA2	1	1	0	0	0	0.272547752825142	0	0	0	4.20999122271906e-11	0	0	0
POLR2J	1	0	1	0	0	0	0.260591788321919	0	0	0	1.10613186123149e-08	0	0
PON2	1	1	0	0	0	0.376593071863631	0	0	0	4.97227503278895e-15	0	0	0
PPP1R16B	1	0	1	0	0	0	0.258948948211228	0	0	0	2.28931067593294e-08	0	0
PPP1R1A	1	1	0	0	0	0.333225735580315	0	0	0	2.24694618229762e-13	0	0	0
PPP2R1A	1	1	0	0	0	0.282772707145138	0	0	0	9.36261176114256e-13	0	0	0
PPP3CB	1	0	1	0	0	0	0.284579037801464	0	0	0	3.08097135791759e-13	0	0
PPP3R1	1	1	0	0	0	0.309836935155399	0	0	0	9.27416925105812e-09	0	0	0
PPP4R4	1	1	0	0	0	0.285530975676018	0	0	0	5.69223503281564e-13	0	0	0
PPP6R1	1	0	1	0	0	0	0.261788040412695	0	0	0	3.03514236611509e-10	0	0
PRDX1	1	0	1	0	0	0	0.253626568039286	0	0	0	1.73137072152817e-11	0	0
PREX1	1	1	0	0	0	0.316059067125715	0	0	0	8.00852302660611e-11	0	0	0
PRMT2	1	0	0	0	1	0	0	0	0.286435336547726	0	0	0	2.71993780319068e-20
PRPS1	1	0	1	0	0	0	0.299142128468437	0	0	0	6.36485031631809e-10	0	0
PRR18	1	0	0	1	0	0	0	0.255541846784014	0	0	0	2.71762694892244e-19	0
PRXL2B	1	1	0	0	0	0.268033072470616	0	0	0	1.79406127501098e-09	0	0	0
PSAT1	1	1	0	0	0	0.429255623361299	0	0	0	3.20962812441387e-21	0	0	0
PSIP1	1	1	0	0	0	0.307354691615636	0	0	0	6.29741468487005e-09	0	0	0
PTK2B	1	1	0	0	0	0.270077902125318	0	0	0	1.91113782523952e-05	0	0	0
PTPA	1	0	1	0	0	0	0.283241344093555	0	0	0	1.13913279174304e-11	0	0
PTPRA	1	1	0	0	0	0.283411847748772	0	0	0	6.05604569128486e-08	0	0	0
PTPRF	1	0	1	0	0	0	0.333991983774976	0	0	0	5.6175721184639e-15	0	0
PTPRR	1	1	0	0	0	0.29543204665873	0	0	0	2.73095915160872e-13	0	0	0
PTTG1IP	1	0	1	0	0	0	0.271025013497399	0	0	0	2.69196884547177e-10	0	0
RAB11FIP4	1	0	1	0	0	0	0.268728595257907	0	0	0	1.7731274018219e-08	0	0
RAB31	1	1	0	0	0	0.3169669426972	0	0	0	9.31168612969074e-11	0	0	0
RAB3C	1	0	0	0	1	0	0	0	0.284410308716342	0	0	0	1.07939202313604e-16
RAB40B	1	0	1	0	0	0	0.251458058025768	0	0	0	1.06001070859896e-08	0	0
RABL6	1	1	0	0	0	0.277338303216031	0	0	0	9.11120151354386e-07	0	0	0
RAMP1	1	0	1	0	0	0	0.471873992445848	0	0	0	4.46028819377155e-27	0	0
RAP1GAP	1	1	0	0	0	0.26220234699416	0	0	0	2.52312514659439e-07	0	0	0
RBM26	1	1	0	0	0	0.26198614062881	0	0	0	6.67769440735289e-08	0	0	0
RBM4	1	0	1	0	0	0	0.316183756939736	0	0	0	9.54091016408535e-15	0	0
RBP4	1	0	1	0	0	0	0.27001719421884	0	0	0	9.47204625359567e-11	0	0
RCN1	1	0	1	0	0	0	0.276876033704679	0	0	0	2.08871921069049e-12	0	0
RCN2	1	1	0	0	0	0.280161195515998	0	0	0	1.08784100727764e-06	0	0	0
RHOA	1	0	1	0	0	0	0.25918484893182	0	0	0	3.45617566659489e-08	0	0
RHOBTB3	1	1	0	0	0	0.326649032963742	0	0	0	1.09284685177488e-11	0	0	0
RHOC	1	0	1	0	0	0	0.431603695416074	0	0	0	1.55848249192102e-24	0	0
RHOU	1	0	0	1	0	0	0	0.263292828791418	0	0	0	4.1863617339098e-16	0
RNASE1	1	0	0	1	0	0	0	0.288955059760418	0	0	0	6.72273366767812e-09	0
RNASEK	1	0	1	0	0	0	0.281073074863485	0	0	0	6.74225221660103e-16	0	0
RNF130	1	1	0	0	0	0.272327961211588	0	0	0	2.12489228576865e-07	0	0	0
RPL10	1	0	1	0	0	0	0.323506292411159	0	0	0	1.32570601546398e-30	0	0
RPL12	1	0	1	0	0	0	0.400214331435488	0	0	0	1.40529055891752e-21	0	0
RPL18	1	0	1	0	0	0	0.340156169600473	0	0	0	4.15882774058622e-26	0	0
RPL18A	1	0	1	0	0	0	0.355543218680744	0	0	0	4.28701246445346e-25	0	0
RPL19	1	0	1	0	0	0	0.309782403823211	0	0	0	6.74929389890007e-21	0	0
RPL21	1	0	1	0	0	0	0.291189228792386	0	0	0	1.91712050080368e-18	0	0
RPL23	1	0	1	0	0	0	0.322088976385263	0	0	0	1.10843527641212e-17	0	0
RPL27	1	0	1	0	0	0	0.344018021470063	0	0	0	2.80235320481753e-23	0	0
RPL28	1	0	1	0	0	0	0.320492659507294	0	0	0	2.57640443975505e-34	0	0
RPL29	1	0	1	0	0	0	0.400199084511554	0	0	0	7.37658485700092e-34	0	0
RPL31	1	0	1	0	0	0	0.278547466362788	0	0	0	1.06553712914649e-23	0	0
RPL35	1	0	1	0	0	0	0.327145480277351	0	0	0	3.52376995696552e-26	0	0
RPL36A	1	0	1	0	0	0	0.32775706755307	0	0	0	3.287106938597e-19	0	0
RPL37A	1	0	1	0	0	0	0.25717369067855	0	0	0	1.45623363290964e-30	0	0
RPL39	1	0	1	0	0	0	0.352754499181954	0	0	0	6.42488213909556e-26	0	0
RPL5	1	0	1	0	0	0	0.265911713825934	0	0	0	1.10054584892393e-11	0	0
RPL8	1	0	1	0	0	0	0.286736409404013	0	0	0	4.11553855708379e-19	0	0
RPLP1	1	0	1	0	0	0	0.345525202602581	0	0	0	1.64978281121326e-37	0	0
RPLP2	1	0	1	0	0	0	0.387387376688207	0	0	0	3.39660252798541e-34	0	0
RPRD1A	1	1	0	0	0	0.274939526268613	0	0	0	1.89700374274351e-06	0	0	0
RPS11	1	0	1	0	0	0	0.384420537772771	0	0	0	2.3446749331677e-30	0	0
RPS16	1	0	1	0	0	0	0.390165760812349	0	0	0	1.68789586657588e-24	0	0
RPS23	1	0	1	0	0	0	0.285554099072939	0	0	0	2.32324254080516e-19	0	0
RPS28	1	0	1	0	0	0	0.333774870530688	0	0	0	4.51778656877319e-34	0	0
RPS3	1	0	1	0	0	0	0.35526296019903	0	0	0	7.20607045698355e-21	0	0
RPS5	1	0	1	0	0	0	0.288484012425639	0	0	0	1.07115556691719e-13	0	0
RPS6KA2	1	1	0	0	0	0.305129996593525	0	0	0	2.93968684223444e-11	0	0	0
RPSA	1	0	1	0	0	0	0.279325087277263	0	0	0	1.60002983271553e-13	0	0
RTN3	1	0	0	0	1	0	0	0	0.343449580088864	0	0	0	1.18595109863199e-54
RTN4R	1	0	1	0	0	0	0.333777200374206	0	0	0	3.98186710987925e-16	0	0
RUNDC3A	1	0	1	0	0	0	0.276397480587027	0	0	0	3.53182502794734e-13	0	0
RUNX1T1	1	1	0	0	0	0.272285128972612	0	0	0	1.64676733468444e-11	0	0	0
S100A1	1	0	0	0	1	0	0	0	0.321137113935839	0	0	0	1.07054434466948e-23
S100A6	1	0	1	0	0	0	0.297386603840959	0	0	0	6.43987346914879e-12	0	0
S100A9	1	0	0	0	1	0	0	0	0.31302182309411	0	0	0	3.50989831436665e-29
SAMHD1	1	0	1	0	0	0	0.253624139572802	0	0	0	7.05414463634264e-11	0	0
SASH1	1	1	0	0	0	0.326528547406803	0	0	0	1.90105768889061e-11	0	0	0
SCRN1	1	1	0	0	0	0.267387972362863	0	0	0	3.64840327121101e-07	0	0	0
SDC3	1	1	0	0	0	0.261211427816704	0	0	0	1.21717625448249e-06	0	0	0
SDC4	1	1	0	0	0	0.356241051254336	0	0	0	2.29205062729898e-15	0	0	0
SDCBP	1	0	1	0	0	0	0.259161833067936	0	0	0	9.59191382696014e-08	0	0
SEMA4D	1	1	0	0	0	0.281898447922439	0	0	0	3.64985899128357e-08	0	0	0
SEMA4F	1	0	0	0	1	0	0	0	0.251703013037273	0	0	0	2.70958101560171e-17
SEPTIN2	1	1	0	0	0	0.331598604965263	0	0	0	1.04956280854016e-11	0	0	0
SERINC1	1	0	0	1	0	0	0	0.252300290868734	0	0	0	2.52765199477931e-21	0
SERINC3	1	0	1	0	0	0	0.302113264121562	0	0	0	2.27474622555712e-13	0	0
SERP1	1	0	1	0	0	0	0.272113509333264	0	0	0	1.80856880374414e-09	0	0
SERPINA1	1	0	0	0	1	0	0	0	0.264534209624561	0	0	0	1.57312691427635e-25
SESN3	1	0	1	0	0	0	0.280614673457466	0	0	0	1.72196635940979e-09	0	0
SEZ6L	1	1	0	0	0	0.304073931575174	0	0	0	1.71573321447396e-08	0	0	0
SFPQ	1	0	1	0	0	0	0.309847563740553	0	0	0	1.49502706285231e-10	0	0
SFXN5	1	1	0	0	0	0.289739351052479	0	0	0	4.68545198464537e-09	0	0	0
SGSM2	1	1	0	0	0	0.265091329606058	0	0	0	5.86738464708192e-06	0	0	0
SH3GL2	1	0	0	0	1	0	0	0	0.392963201439362	0	0	0	8.32844390863641e-42
SH3GL3	1	1	0	0	0	0.299331348030613	0	0	0	1.72579718704769e-08	0	0	0
SH3GLB2	1	1	0	0	0	0.252060114505202	0	0	0	5.92645109068115e-06	0	0	0
SHTN1	1	1	0	0	0	0.335854348034848	0	0	0	1.07406220000446e-10	0	0	0
SIRPA	1	0	1	0	0	0	0.282760710704579	0	0	0	1.51324983161814e-12	0	0
SLC1A4	1	1	0	0	0	0.289936830564621	0	0	0	2.80890850109932e-07	0	0	0
SLC23A2	1	1	0	0	0	0.353332707760462	0	0	0	4.96396187397889e-15	0	0	0
SLC26A4-AS1	1	0	1	0	0	0	0.262062682198242	0	0	0	4.19115720341596e-07	0	0
SLC39A10	1	0	0	0	1	0	0	0	0.32810552644962	0	0	0	2.72718540758155e-24
SLC39A12	1	1	0	0	0	0.251286794469627	0	0	0	1.94998638911269e-07	0	0	0
SLC3A2	1	0	1	0	0	0	0.283709342885301	0	0	0	4.25179101818342e-10	0	0
SLC44A2	1	0	1	0	0	0	0.259725458243466	0	0	0	1.05656677751976e-07	0	0
SLC4A4	1	1	0	0	0	0.300346061461159	0	0	0	1.54388754496444e-11	0	0	0
SLC7A14	1	1	0	0	0	0.286194105673794	0	0	0	7.36829139141123e-08	0	0	0
SLC7A5	1	0	1	0	0	0	0.292549356611945	0	0	0	3.45218569029402e-11	0	0
SLIT3	1	0	0	1	0	0	0	0.329318989379609	0	0	0	9.72823283989906e-28	0
SMARCD3	1	1	0	0	0	0.31016107551101	0	0	0	4.53814573459577e-09	0	0	0
SNTA1	1	1	0	0	0	0.301682067003902	0	0	0	2.01313478467761e-08	0	0	0
SOD1	1	0	0	0	1	0	0	0	0.25722815990855	0	0	0	3.72365942750316e-31
SORBS2	1	1	0	0	0	0.287369399235379	0	0	0	1.97664453962978e-09	0	0	0
SORT1	1	1	0	0	0	0.255579685076184	0	0	0	1.43580451083372e-05	0	0	0
SOX2-OT	1	1	0	0	0	0.283461088028088	0	0	0	1.01195283574429e-06	0	0	0
SOX8	1	1	0	0	0	0.276642028258772	0	0	0	9.84927285801225e-09	0	0	0
SPCS2	1	0	1	0	0	0	0.265164515982101	0	0	0	2.20703799378315e-07	0	0
SPIN1	1	1	0	0	0	0.252000394931241	0	0	0	4.32674934414097e-05	0	0	0
SPINT2	1	1	0	0	0	0.299058834087819	0	0	0	2.17436321281706e-08	0	0	0
SPOCK1	1	1	0	0	0	0.347668910429316	0	0	0	3.0540142007952e-15	0	0	0
SPOCK2	1	1	0	0	0	0.268412098681025	0	0	0	4.16414743552703e-08	0	0	0
SPPL3	1	1	0	0	0	0.256762905499576	0	0	0	7.81158226554072e-06	0	0	0
SPRED1	1	0	1	0	0	0	0.260839452571334	0	0	0	1.27149558609808e-08	0	0
SQSTM1	1	0	1	0	0	0	0.328889667549706	0	0	0	2.0895882768958e-18	0	0
SREBF1	1	1	0	0	0	0.426315553395748	0	0	0	4.71657410330462e-21	0	0	0
SRSF11	1	1	0	0	0	0.256834747160586	0	0	0	5.56423242605291e-05	0	0	0
SRSF2	1	1	0	0	0	0.325834032208147	0	0	0	6.8715050175866e-11	0	0	0
SSR4	1	0	1	0	0	0	0.259511195485085	0	0	0	6.84307197243349e-07	0	0
ST6GALNAC6	1	0	1	0	0	0	0.261989325390698	0	0	0	1.95422758696766e-08	0	0
STMN1	1	0	0	0	1	0	0	0	0.316275459640033	0	0	0	3.68113276050292e-51
STMN4	1	0	0	0	1	0	0	0	0.268584113850986	0	0	0	2.02969882399639e-16
STOM	1	0	1	0	0	0	0.324288003693643	0	0	0	2.2689629477508e-12	0	0
SUB1	1	0	0	0	1	0	0	0	0.263123921927131	0	0	0	2.38768430336027e-18
SVOP	1	0	0	0	1	0	0	0	0.32642119311648	0	0	0	9.89281794321644e-26
SYNGR1	1	0	1	0	0	0	0.280436088200501	0	0	0	7.1440251200463e-11	0	0
SYNPR	1	1	0	0	0	0.346477799581822	0	0	0	1.45522667905961e-10	0	0	0
TAF15	1	1	0	0	0	0.272026253077105	0	0	0	3.47437777647308e-10	0	0	0
TAOK1	1	1	0	0	0	0.254777430162131	0	0	0	2.42503947729344e-05	0	0	0
TAPBP	1	0	1	0	0	0	0.31953618552367	0	0	0	3.78554328613241e-13	0	0
TENM2	1	1	0	0	0	0.31522175414173	0	0	0	3.6247644043367e-12	0	0	0
TGOLN2	1	1	0	0	0	0.258010402460546	0	0	0	4.43756018875648e-05	0	0	0
TIMP3	1	1	0	0	0	0.332194830615444	0	0	0	1.94900929587349e-12	0	0	0
TLE1	1	0	1	0	0	0	0.272359679481266	0	0	0	8.63683369168688e-10	0	0
TLE5	1	0	1	0	0	0	0.275790317800194	0	0	0	9.21950720858824e-20	0	0
TM2D3	1	1	0	0	0	0.278963238945462	0	0	0	1.41693174009974e-06	0	0	0
TMED9	1	0	1	0	0	0	0.267001867214242	0	0	0	1.19377492740956e-07	0	0
TMEM176B	1	0	1	0	0	0	0.313049799317898	0	0	0	2.09525443253903e-15	0	0
TNR	1	1	0	0	0	0.283262247928013	0	0	0	4.50283006039564e-07	0	0	0
TNS3	1	1	0	0	0	0.340451686918388	0	0	0	2.89456532008664e-14	0	0	0
TOLLIP	1	0	1	0	0	0	0.277288109114434	0	0	0	7.40172632899879e-12	0	0
TPD52L1	1	1	0	0	0	0.290467913534917	0	0	0	1.00966715244741e-07	0	0	0
TPD52L2	1	0	1	0	0	0	0.264275672083309	0	0	0	1.90976096720295e-08	0	0
TPP1	1	0	1	0	0	0	0.316732777184738	0	0	0	1.41913773097052e-11	0	0
TPPP	1	0	1	0	0	0	0.275545069027657	0	0	0	2.38329143111413e-12	0	0
TPPP3	1	1	0	0	0	0.28897574863567	0	0	0	4.81682595951692e-10	0	0	0
TRIM36	1	0	1	0	0	0	0.256530567346947	0	0	0	2.35739948363512e-09	0	0
TRIM8	1	1	0	0	0	0.309861494921591	0	0	0	6.27456449528524e-11	0	0	0
TSPO	1	0	1	0	0	0	0.301805789408934	0	0	0	1.06920721541288e-12	0	0
TTC3	1	1	0	0	0	0.274077488213722	0	0	0	6.26822181868599e-09	0	0	0
TUBB3	1	0	0	1	0	0	0	0.331428565268611	0	0	0	4.92610377621047e-20	0
TYRO3	1	0	1	0	0	0	0.265479172922961	0	0	0	4.75478654516426e-09	0	0
UBB	1	0	0	0	1	0	0	0	0.256418204304119	0	0	0	2.27140610698518e-52
UBE2K	1	1	0	0	0	0.253055926419702	0	0	0	7.12036468738505e-07	0	0	0
UBQLN2	1	1	0	0	0	0.276054437982623	0	0	0	2.19967030689341e-07	0	0	0
UGT8	1	0	0	1	0	0	0	0.250304876854552	0	0	0	2.26576044288821e-21	0
UHMK1	1	1	0	0	0	0.290650290160318	0	0	0	1.10668053148497e-08	0	0	0
USP54	1	1	0	0	0	0.252576358085522	0	0	0	1.62248264396417e-08	0	0	0
VEGFB	1	1	0	0	0	0.270644601985732	0	0	0	9.41728415671359e-09	0	0	0
VGF	1	0	1	0	0	0	0.26773689113561	0	0	0	4.25704334520155e-11	0	0
VXN	1	0	1	0	0	0	0.26583296000926	0	0	0	1.68611747793067e-07	0	0
WASF3	1	1	0	0	0	0.284917415988093	0	0	0	5.19682406796158e-05	0	0	0
WDR1	1	1	0	0	0	0.254220095678671	0	0	0	1.15230924530586e-06	0	0	0
WDR6	1	1	0	0	0	0.275504019650805	0	0	0	3.97386818506282e-09	0	0	0
WFS1	1	1	0	0	0	0.273542238705996	0	0	0	6.49777312165419e-08	0	0	0
WNK1	1	1	0	0	0	0.338442314532652	0	0	0	1.24583954628211e-11	0	0	0
WSB1	1	0	0	1	0	0	0	0.298651163461269	0	0	0	5.24153741517519e-16	0
YIPF4	1	1	0	0	0	0.2599382313701	0	0	0	6.86317272789667e-08	0	0	0
YJEFN3	1	0	1	0	0	0	0.302535567037151	0	0	0	8.04753306884561e-12	0	0
YWHAG	1	0	0	0	1	0	0	0	0.265395890346854	0	0	0	2.82951496513645e-36
ZEB2	1	1	0	0	0	0.309402962845533	0	0	0	4.02189120348857e-10	0	0	0
ZMIZ1	1	1	0	0	0	0.299603064176068	0	0	0	1.17809329121692e-09	0	0	0
ZSCAN18	1	0	1	0	0	0	0.271278423981502	0	0	0	2.3984209447479e-09	0	0

## Sheet: Layer 5_AD_down_DEG
This spreadsheet is derived from DEGs analysis by comparing gene expression between AD and CT from Layer 5. Column A indicates gene ID. Column B indicates the number of overlapping genes from four comparisons. Column G to column J indicates the log fold change of four comparisons.
Gene	contribution summary					logFC (e as base, cutoff >= 0.25)				adjusted p-value (Wilcoxon test, cutoff <= 0.05)
ID	overlap	AD1 vs CT1	AD2 vs CT2	AD1 vs CT2	AD2 vs CT2	Layer 5_down_logFC_AD1_CT1	Layer 5_down_logFC_AD2_CT1	Layer 5_down_logFC_AD1_CT2	Layer 5_down_logFC_AD2_CT2	Layer 5down_Adj.pval_AD1_CT1	Layer 5down_Adj.pval_AD2_CT1	Layer 5down_Adj.pval_AD1_CT2	Layer 5down_Adj.pval_AD2_CT2
CHGA	4	1	1	1	1	-0.407111847099052	-0.510544501386225	-0.674172598458755	-0.777605252745929	4.14106400040033e-26	3.08032778517951e-46	4.04298894660031e-68	5.96294348834999e-110
SCN1B	4	1	1	1	1	-0.39703097736057	-0.364928141481854	-0.548588946682886	-0.51648611080417	6.65804605210565e-21	8.88024567220459e-22	3.37205129393449e-47	1.74676144760605e-57
COX7A1	3	1	1	1	0	-0.433889290851317	-0.311453470258992	-0.370762395366522	0	1.81858372331167e-27	1.97411912976663e-18	4.04971344443945e-24	0
HBB	3	0	1	1	1	0	-0.421535830152107	-0.27055728168261	-0.665631402704063	0	0.0756091681046755	0.0237189507824759	2.78400667982761e-59
AGT	2	0	0	1	1	0	0	-0.338471592654173	-0.293354517187973	0	0	4.52963026669388e-17	5.90084519031442e-17
AL121820.2	2	0	0	1	1	0	0	-0.291055439910802	-0.27083999286628	0	0	1.52271772521165e-17	4.11612286507732e-22
CPLX1	2	1	0	1	0	-0.257102627469836	0	-0.28355649990675	0	2.71437357406058e-10	0	7.26046695714043e-13	0
DEPP1	2	1	1	0	0	-0.567504707612928	-0.254295056419044	0	0	4.38279711709653e-43	8.76647639692892e-08	0	0
GADD45B	2	1	1	0	0	-0.418677933868828	-0.362759099285292	0	0	2.91283190933243e-24	2.21931732701104e-21	0	0
HAPLN4	2	0	0	1	1	0	0	-0.280262912951121	-0.262471677643487	0	0	8.72044416563655e-16	6.6533264558936e-19
MT1X	2	0	1	0	1	0	-0.307944064499053	0	-0.380891952882855	0	7.40401752754984e-08	0	2.59887728202997e-29
NDUFA4	2	1	1	0	0	-0.369721603348959	-0.370466488181086	0	0	1.4171253316467e-48	4.31292101245706e-58	0	0
NEFH	2	0	0	1	1	0	0	-0.323479213790861	-0.286773043459338	0	0	1.39950484475479e-12	7.76892317448311e-12
PCP4	2	1	1	0	0	-0.389316943065087	-0.28396385023766	0	0	2.75938902721819e-16	1.29048280380473e-07	0	0
PPP1R1B	2	0	0	1	1	0	0	-0.3853966280944	-0.404803773196404	0	0	1.48505278339017e-25	1.08160386506726e-37
RPS26	2	0	0	1	1	0	0	-0.521731137687438	-0.384691350930223	0	0	1.23559774712519e-50	5.64815293372243e-38
S100B	2	0	0	1	1	0	0	-0.310280024790588	-0.292381995992984	0	0	1.22860811988921e-17	6.22782511695327e-22
SPARCL1	2	0	1	0	1	0	-0.307689534197138	0	-0.301437236783235	0	4.35123324928176e-44	0	1.02747089540833e-62
TSC22D1	2	1	0	1	0	-0.306201756453084	0	-0.252855198732392	0	1.34062268710441e-27	0	1.65715490067488e-23	0
TSC22D3	2	0	0	1	1	0	0	-0.399585027069638	-0.315612593690845	0	0	5.59613274676298e-31	2.31750830346306e-26
VWF	2	0	0	1	1	0	0	-0.358763713396816	-0.311570650788155	0	0	5.39825412406583e-19	7.43093075828923e-19
WIF1	2	0	0	1	1	0	0	-0.257440666254619	-0.282217766965407	0	0	4.28039306829721e-14	2.29876394474773e-27
ACBD7	1	0	0	0	1	0	0	0	-0.28188159215134	0	0	0	6.98781648140865e-22
ANGPTL4	1	0	1	0	0	0	-0.254765755415732	0	0	0	2.47652312741081e-12	0	0
ATP1A1	1	1	0	0	0	-0.318459901725534	0	0	0	9.91818649374899e-20	0	0	0
C11orf96	1	0	1	0	0	0	-0.310207296662889	0	0	0	2.2384091708734e-16	0	0
CABP1	1	0	0	1	0	0	0	-0.257069908208426	0	0	0	8.44500577110195e-14	0
CAMK1D	1	0	0	1	0	0	0	-0.259761564815032	0	0	0	1.12891713829914e-11	0
CAMK2G	1	0	0	0	1	0	0	0	-0.319355579969679	0	0	0	2.55434349335849e-22
CAMTA1	1	0	0	1	0	0	0	-0.294414031840582	0	0	0	8.19801066988062e-15	0
CARTPT	1	1	0	0	0	-0.257477932409501	0	0	0	8.18737515737553e-15	0	0	0
CHGB	1	0	1	0	0	0	-0.340053300412606	0	0	0	2.19206800019612e-19	0	0
CIRBP	1	0	0	0	1	0	0	0	-0.28707053664398	0	0	0	6.48533615612941e-23
DIRAS1	1	0	0	1	0	0	0	-0.251453806401301	0	0	0	7.15074706290343e-10	0
ETS2	1	0	0	1	0	0	0	-0.272735984230809	0	0	0	1.50052821423068e-12	0
F3	1	0	1	0	0	0	-0.265214182194359	0	0	0	1.02936324326445e-09	0	0
GJB6	1	0	0	0	1	0	0	0	-0.256937685835268	0	0	0	1.47935814579222e-15
GOLGA8B	1	0	0	0	1	0	0	0	-0.271313734399856	0	0	0	3.47539589970956e-19
GSTM5	1	0	0	0	1	0	0	0	-0.250918623803148	0	0	0	5.22111354907886e-17
HBA2	1	0	0	0	1	0	0	0	-0.298743516921627	0	0	0	4.55894237234602e-19
NAA38	1	0	0	0	1	0	0	0	-0.294363933152182	0	0	0	2.03388551099025e-20
OIP5-AS1	1	0	0	1	0	0	0	-0.270660728175004	0	0	0	2.8026433771171e-13	0
RBM3	1	0	0	0	1	0	0	0	-0.286765807202799	0	0	0	2.31972296143555e-27
RCAN2	1	0	0	1	0	0	0	-0.291514506188359	0	0	0	3.7814138759197e-13	0
RGS4	1	1	0	0	0	-0.270454622552471	0	0	0	3.94329527408997e-12	0	0	0
RORB	1	0	0	1	0	0	0	-0.433160944922846	0	0	0	3.88490117253462e-29	0
RPH3A	1	0	0	1	0	0	0	-0.395502347454791	0	0	0	1.28921454154499e-26	0
RPS27	1	0	0	1	0	0	0	-0.26682239576487	0	0	0	3.37594714659174e-27	0
SCARA3	1	0	0	1	0	0	0	-0.301236691337974	0	0	0	1.45426453547033e-15	0
SCG3	1	0	0	1	0	0	0	-0.324666943146361	0	0	0	1.94693411134051e-18	0
SNHG6	1	0	0	0	1	0	0	0	-0.306209475983282	0	0	0	2.92070455154035e-22
SRP14	1	0	0	1	0	0	0	-0.309732213782217	0	0	0	3.77324536716513e-27	0
TBR1	1	0	0	0	1	0	0	0	-0.303632838083702	0	0	0	8.48071077374235e-21
TESPA1	1	0	0	1	0	0	0	-0.286621166724653	0	0	0	2.41313464782409e-13	0
TFRC	1	0	0	0	1	0	0	0	-0.265479176483553	0	0	0	2.25150826563341e-22
VSNL1	1	1	0	0	0	-0.285663434906124	0	0	0	1.10840745787927e-24	0	0	0
ZFP36	1	1	0	0	0	-0.251573233684763	0	0	0	6.50884671463748e-11	0	0	0
#N/A	#N/A	#N/A	#N/A	#N/A	#N/A	#N/A	#N/A	#N/A	#N/A	#N/A	#N/A	#N/A	#N/A
#N/A	#N/A	#N/A	#N/A	#N/A	#N/A	#N/A	#N/A	#N/A	#N/A	#N/A	#N/A	#N/A	#N/A
#N/A	#N/A	#N/A	#N/A	#N/A	#N/A	#N/A	#N/A	#N/A	#N/A	#N/A	#N/A	#N/A	#N/A
#N/A	#N/A	#N/A	#N/A	#N/A	#N/A	#N/A	#N/A	#N/A	#N/A	#N/A	#N/A	#N/A	#N/A
#N/A	#N/A	#N/A	#N/A	#N/A	#N/A	#N/A	#N/A	#N/A	#N/A	#N/A	#N/A	#N/A	#N/A
#N/A	#N/A	#N/A	#N/A	#N/A	#N/A	#N/A	#N/A	#N/A	#N/A	#N/A	#N/A	#N/A	#N/A
#N/A	#N/A	#N/A	#N/A	#N/A	#N/A	#N/A	#N/A	#N/A	#N/A	#N/A	#N/A	#N/A	#N/A
#N/A	#N/A	#N/A	#N/A	#N/A	#N/A	#N/A	#N/A	#N/A	#N/A	#N/A	#N/A	#N/A	#N/A
#N/A	#N/A	#N/A	#N/A	#N/A	#N/A	#N/A	#N/A	#N/A	#N/A	#N/A	#N/A	#N/A	#N/A

## Sheet: Layer 6_AD_up_DEG
This spreadsheet is derived from DEGs analysis by comparing gene expression between AD and CT from Layer 6. Column A indicates gene ID. Column B indicates the number of overlapping genes from four comparisons. Column G to column J indicates the log fold change of four comparisons.
Gene	contribution summary					logFC (e as base, cutoff >= 0.25)				adjusted p-value (Wilcoxon test, cutoff <= 0.05)
ID	overlap	AD1 vs CT1	AD2 vs CT2	AD1 vs CT2	AD2 vs CT2	Layer 6_up_logFC_AD1_CT1	Layer 6_up_logFC_AD2_CT1	Layer 6_up_logFC_AD1_CT2	Layer 6_up_logFC_AD2_CT2	Layer 6up_Adj.pval_AD1_CT1	Layer 6up_Adj.pval_AD2_CT1	Layer 6up_Adj.pval_AD1_CT2	Layer 6up_Adj.pval_AD2_CT2
APLP1	4	1	1	1	1	0.30285808256211	0.263958906808277	0.325495047711328	0.286595871957496	1.28512181859564e-19	2.01692051002346e-14	1.47569360586328e-18	4.78179883113747e-14
APOC1	4	1	1	1	1	0.293460765215564	0.50859273706512	0.34315936101107	0.558291332860626	1.18182490047383e-09	3.37435580967501e-25	1.3227103348402e-14	1.08964519061344e-27
ATP2B4	4	1	1	1	1	0.446499262304977	0.362482266030865	0.383834213103879	0.299817216829767	9.42089337282075e-27	1.77784164663205e-13	9.45187570038565e-17	1.97307712500476e-07
BAIAP3	4	1	1	1	1	0.471772426435602	0.387533015661318	0.54110024346354	0.456860832689256	2.67705997114478e-29	4.58111806042579e-18	1.73383642812032e-31	2.36585839803172e-21
C3	4	1	1	1	1	0.259947381928543	0.573080549549248	0.407022595028995	0.720155762649701	4.57005706532078e-08	5.72731331801822e-32	6.9293679900529e-22	1.76445349740147e-43
CD74	4	1	1	1	1	0.571917493356862	0.748232757885977	0.525123005636802	0.701438270165916	7.87011069397103e-33	1.34376697589332e-58	8.52169162430564e-24	7.18922269307129e-46
CPNE6	4	1	1	1	1	0.484882135272924	0.522436537662764	0.33736671709821	0.37492111948805	9.54823439757168e-29	2.06073171024222e-29	5.0009765445633e-13	5.43151511087444e-14
EEF1B2	4	1	1	1	1	0.278142245861395	0.267531475269043	0.283362735913558	0.272751965321206	2.10150599759504e-08	4.07567585821635e-08	3.63716295677231e-08	3.75673781705787e-08
GDA	4	1	1	1	1	0.50258872895602	0.297187684851931	0.46891933347835	0.263518289374261	2.99315209896789e-30	2.30551905427509e-08	3.23939854889926e-23	2.988268307397e-06
GFAP	4	1	1	1	1	0.443779739619067	0.704197180178617	1.12933828103615	1.3897557215957	5.09156062539761e-81	9.42646532077577e-127	7.36975111341473e-112	2.34968896189504e-112
HIPK2	4	1	1	1	1	0.595835023605259	0.364491366748038	0.536143605204786	0.304799948347565	8.11825949168203e-41	5.54817111527152e-13	3.38475011439535e-28	5.0541061747558e-08
HLA-DRA	4	1	1	1	1	0.305473775020467	0.406255531078455	0.433609028019998	0.534390784077986	3.00153896183681e-12	2.31521554455393e-14	1.71771433261112e-24	6.31055088322931e-25
HPCAL4	4	1	1	1	1	0.426235391761532	0.592174572607849	0.347027422935737	0.512966603782054	2.720763580625e-23	7.73244717398614e-45	8.00638489316079e-15	1.23789256220277e-31
HSP90AB1	4	1	1	1	1	0.25686866934691	0.41649960526931	0.254851492098843	0.414482428021242	2.6323401960668e-22	3.2761001276484e-59	4.48655221275622e-18	8.02757448405918e-47
LINC02607	4	1	1	1	1	0.320029048574799	0.324536514875562	0.34365710280083	0.348164569101593	1.79239784249041e-12	4.57035531698602e-08	3.25250147212904e-16	1.57140675872441e-11
LY6H	4	1	1	1	1	0.444592545984838	0.297106888538454	0.412780129617397	0.265294472171013	2.26133487116702e-37	1.47902420551e-15	7.43035199898969e-27	3.71479677691392e-10
MAP4K4	4	1	1	1	1	0.50181323453949	0.277591922294884	0.488004607583051	0.263783295338446	5.79167767817713e-32	1.74464624197151e-05	6.66340455445676e-27	2.72212283554972e-06
MBP	4	1	1	1	1	0.862393338280198	0.47733034239153	0.852137247422424	0.467074251533757	1.15806898809018e-117	2.03640584055154e-62	2.80148020076135e-102	2.07841446290939e-51
MMD	4	1	1	1	1	0.451757819558444	0.339672642081526	0.511638807221281	0.399553629744364	8.34069778216272e-23	1.14327738206697e-09	8.73075715953224e-27	7.44740544389127e-15
MT-ND2	4	1	1	1	1	0.697558264311994	0.635895645486578	0.313876239291192	0.252213620465775	9.67192162222827e-123	5.06445395734152e-118	8.60402810791265e-51	1.64812111131336e-41
MT-ND3	4	1	1	1	1	0.961055923142368	0.931873807469492	0.303019909546273	0.273837793873397	8.468201247512e-133	1.09654572071868e-130	1.39668246515363e-67	3.77735531998105e-56
MT-ND4	4	1	1	1	1	0.814872174509659	0.90433946867853	0.256452622650459	0.34591991681933	1.00698392050718e-132	4.1803388512729e-131	1.58942752267259e-59	4.59877454951984e-85
NPY	4	1	1	1	1	0.641038730712192	0.641719854056284	0.667268364611109	0.667949487955202	6.08596428569377e-38	5.89298539126289e-15	2.55739690488265e-38	2.98856578558207e-18
NSG2	4	1	1	1	1	0.404879575525668	0.472522547166664	0.318133097374558	0.385776069015555	9.14785787607439e-21	8.28055205095285e-29	1.51226196270219e-11	8.15396298077239e-18
PEA15	4	1	1	1	1	0.428173804326363	0.677368199291179	0.277236357921352	0.526430752886168	5.96807202919648e-43	1.18057907048547e-91	2.54220455786445e-17	7.71016300767433e-58
PGRMC1	4	1	1	1	1	0.357430271420667	0.33031178245513	0.337916578917204	0.310798089951667	3.00281262808675e-16	5.11388596806224e-13	2.71850129018257e-13	1.12724180326627e-10
PLPPR4	4	1	1	1	1	0.388915732614558	0.321347345526308	0.418644551325292	0.351076164237042	3.50503650640682e-19	7.34368773978886e-08	1.56137135241733e-21	1.43920924428838e-11
PMP2	4	1	1	1	1	0.253634880112969	0.372249565104955	0.363413942774997	0.482028627766982	3.40067676495038e-07	2.0595765922938e-13	2.18188471115238e-15	4.0258437239638e-21
PSD3	4	1	1	1	1	0.45662966612733	0.403683341915166	0.333334156297113	0.280387832084949	1.00474638730816e-30	2.33287059236005e-24	1.52134951585575e-14	3.89885177512218e-10
PTMA	4	1	1	1	1	0.344755165746925	0.279362545433809	0.412157712622706	0.346765092309589	2.08352085593406e-26	6.44652037788192e-14	3.35266492740054e-30	6.23161143400982e-19
QDPR	4	1	1	1	1	0.484321926839855	0.275840791825353	0.614223178339883	0.405742043325382	3.24129114372671e-32	5.10096114269867e-10	3.69803435571071e-41	1.1732514749641e-19
QKI	4	1	1	1	1	0.576776492006158	0.355486394448433	0.521023646992206	0.29973354943448	1.62349607439293e-46	1.03405072214864e-15	3.22666323047461e-35	3.03992312318882e-10
SCN3B	4	1	1	1	1	0.415500470287257	0.42135381472259	0.394093490724603	0.399946835159936	5.12837435087663e-25	3.9366415160247e-23	2.80970485661043e-20	3.69592496793448e-19
SLC17A7	4	1	1	1	1	0.39938141119127	0.436993368539201	0.365926005437125	0.403537962785057	3.62434150839788e-40	2.89422604778047e-48	2.06160499736296e-29	8.46703334035498e-36
STUM	4	1	1	1	1	0.364033347687022	0.284520149187326	0.333988360499404	0.254475161999708	1.60841631263927e-18	1.44339879133599e-08	2.65059150053987e-15	1.92841401702902e-07
SYN2	4	1	1	1	1	0.256689704754139	0.304574619094079	0.36694428963697	0.414829203976911	8.55157591398553e-13	3.15624478360833e-17	1.98033230032874e-21	4.82774446480535e-25
TIMP2	4	1	1	1	1	0.466532375550183	0.528646520336102	0.406214542016842	0.468328686802761	4.72663359690095e-28	2.27648772515273e-36	8.06891841099713e-20	9.42345819790329e-27
APOD	3	1	1	0	1	0.494361834251618	0.609907190084132	0	0.265384466297133	5.17833863715971e-34	2.28192057716633e-47	0	8.01285503144838e-08
AQP4	3	1	1	1	0	0.473840112165137	0.353261578814829	0.35369711868364	0	2.31264429317618e-34	1.60206122029416e-20	3.48252958920503e-18	0
AUXG01000058.1	3	1	1	0	1	0.25398380494548	0.386898595574864	0	0.272844553627369	3.5136225075255e-07	6.42271073016983e-19	0	3.66901845970531e-08
C1QB	3	0	1	1	1	0	1.14066410581358	0.340055453402693	1.25245412991898	0	3.79133556157201e-105	1.74037135137707e-10	2.17188583613818e-94
C1QC	3	0	1	1	1	0	0.639420152150006	0.336584401616038	0.851243360854538	0	1.44044928246165e-39	1.21238781064967e-14	7.33306694501467e-56
CAMK2D	3	1	1	0	1	0.252098971396128	0.334672494374921	0	0.263045922809029	6.36830962131004e-06	2.54005395544841e-12	0	2.44304949814901e-06
CLDN11	3	1	0	1	1	0.277151598654711	0	0.636966608134545	0.381173455968389	1.49292273422117e-09	0	3.60988775600861e-46	2.37134739104375e-17
CLDND1	3	1	0	1	1	0.328197727322137	0	0.58495554967492	0.460533490895264	2.70766611911655e-10	0	2.81903852519455e-30	3.49336759123325e-20
CNDP1	3	1	0	1	1	0.284023520956381	0	0.444097229584161	0.259584254946559	1.07065023662625e-09	0	1.39438355788294e-27	4.18741245261855e-10
CRYAB	3	0	1	1	1	0	0.918138550630097	0.635390847676756	1.30387820355595	0	9.26962725592301e-105	2.3030013917784e-50	2.61238561553357e-105
CTXN1	3	1	1	0	1	0.318258353114365	0.453555623798872	0	0.336173791758702	3.51988273038365e-17	7.97402170292187e-32	0	6.67760844031389e-15
DBNDD2	3	1	0	1	1	0.271506858293378	0	0.515204591255113	0.397407215024739	5.17099533624114e-07	0	6.0791497808813e-24	3.60330396852078e-13
DNAJB2	3	1	1	0	1	0.256865489889645	0.358498810787655	0	0.277528145648113	2.87404630638008e-06	8.49118209073435e-15	0	3.26065556270794e-08
EDIL3	3	1	0	1	1	0.253130360601852	0	0.387703777114438	0.299318992705928	4.24854107132101e-06	0	9.43985122707362e-16	1.42626067077194e-06
ENPP2	3	1	0	1	1	0.277938018351239	0	0.557452261694133	0.259654622971357	9.13273570886947e-08	0	1.43641066994892e-36	2.92252494403991e-09
ERMN	3	1	0	1	1	0.321672434318529	0	0.534532289148937	0.250773058602431	1.36146443277592e-12	0	3.34216273658085e-34	1.21727258256746e-05
FABP3	3	0	1	1	1	0	0.25129735250716	0.33719767772949	0.534561342139206	0	0.0122787799786059	2.2531021948423e-14	5.62508983254098e-24
FTL	3	1	1	0	1	0.273695574671985	0.962459052861421	0	0.696293141747487	2.43444718060537e-31	2.13265153952919e-129	0	3.16363973310216e-102
FXYD6	3	1	0	1	1	0.250134299674728	0	0.439743794874928	0.300363923088101	3.58099528080157e-13	0	4.66809575753269e-30	4.65204053125093e-15
GABRA5	3	1	1	1	0	0.415777866621342	0.327554140709137	0.321776483225236	0	2.88029486624255e-18	2.79826153770879e-08	6.61469128768787e-12	0
GNG2	3	1	1	0	1	0.339544204348012	0.356426769831617	0	0.254272112527457	4.41015061629145e-12	1.35027589883215e-10	0	0.000890671722543842
GPM6B	3	1	1	1	0	0.492881527405869	0.303873453076968	0.295148253228589	0	1.28979043402438e-50	2.55493834441435e-19	2.56615778540343e-19	0
HSPA5	3	0	1	1	1	0	0.310639907000336	0.251365378687974	0.627943251043666	0	1.3474211650233e-12	3.17326299315631e-08	1.98325141901509e-41
ID4	3	1	1	1	0	0.537015038678795	0.38570901138102	0.345209926268512	0	1.8223501329731e-37	8.7308536063793e-12	1.89039401440644e-17	0
IRF2BP2	3	1	0	1	1	0.267769034938468	0	0.390543392069606	0.26855415880427	1.06174343709973e-09	0	6.11559996754189e-23	8.69135902572716e-09
LAMP2	3	1	0	1	1	0.336127982998114	0	0.666968701335755	0.400927158745204	8.65116470995435e-12	0	9.27349766726811e-42	8.20737647505961e-16
MOBP	3	1	0	1	1	0.453791649133353	0	0.762840053666393	0.423871421245181	3.16219036309923e-23	0	1.59586823438437e-49	1.14672936345484e-18
MT-ND4L	3	1	1	0	1	0.886969280633803	1.09464054537775	0	0.328755999567364	5.14261613998049e-102	4.15712540641372e-120	0	2.33787321219634e-30
MTRNR2L1	3	1	1	1	0	3.27165699582667	0.380694818000443	2.78391557751339	0	8.33001191103581e-137	6.75553464814054e-15	3.32556905599653e-114	0
NPTX1	3	1	1	1	0	0.488468811372176	0.328831588096504	0.345718959201389	0	4.86675822449037e-37	2.16385139816056e-17	3.17024072675747e-17	0
NPTXR	3	1	1	0	1	0.27820009112533	0.664502381347692	0	0.370993991132786	7.28255770608866e-06	6.37493047207072e-67	0	4.84363094940689e-23
NUPR1	3	0	1	1	1	0	0.752020362405156	0.273654411010104	0.959289028021033	0	4.26301345846402e-58	3.96131463646387e-10	8.48146385233974e-70
PEG10	3	1	0	1	1	0.562911646139001	0	0.787936786239859	0.369954293277569	6.51502533689282e-39	0	1.44895850369608e-55	2.28734533259216e-13
PIP4K2A	3	1	0	1	1	0.292222502921351	0	0.556177353207224	0.357796747382783	5.42954555333322e-08	0	8.31028687505714e-32	1.60585937862032e-13
PLEKHB1	3	1	1	1	0	0.514040898682532	0.397617461848548	0.269722139743121	0	2.87870626267393e-38	5.21503074582889e-26	1.60111529092018e-09	0
PLP1	3	1	0	1	1	0.584636114881934	0	1.51733084368774	1.08158354488061	1.97873170754165e-58	0	1.22396598427574e-108	1.87878839178939e-83
PPP1R14A	3	1	0	1	1	0.298702994246225	0	0.57007683686653	0.380073812793839	6.33571019614417e-10	0	2.89062098479923e-35	3.21745249574409e-13
PRKCG	3	0	1	1	1	0	0.263460999636736	0.385542861978645	0.468922079133865	0	2.72628023522406e-06	1.17686019266548e-19	4.79367982014725e-23
RNASET2	3	1	0	1	1	0.256191353878372	0	0.304040647442033	0.281764158033719	1.16091424382443e-07	0	6.40685391837266e-13	9.12028465949416e-08
RNF130	3	1	0	1	1	0.336807366706857	0	0.348424533264752	0.255322330185923	2.26929808775211e-12	0	4.41705545096255e-13	0.000210848382246141
RPLP1	3	1	1	0	1	0.257912142269121	0.365360692156158	0	0.259730094116915	6.53986983749577e-21	1.25531964444341e-44	0	5.92269330905348e-22
RPS18	3	1	1	0	1	0.314462510081212	0.48159799897164	0	0.262599593857188	8.73330409049332e-27	4.27498904120809e-52	0	6.29042799169584e-16
SCD5	3	1	1	1	0	0.414986547736931	0.381315398063855	0.265636550685372	0	5.25801597817871e-27	1.43419760351119e-22	1.18603816379142e-09	0
SEPTIN4	3	1	0	1	1	0.257880627892435	0	0.387633396801774	0.269351622010881	5.2579153734809e-08	0	9.75225149687249e-17	2.62563630645525e-08
SPP1	3	0	1	1	1	0	0.665898370631498	0.37830292948584	1.11257086022278	0	3.73730380425486e-50	1.26077748978921e-13	2.0660770501636e-82
STMN3	3	1	1	1	0	0.283709576428268	0.258197825280791	0.259067735078819	0	1.60028558154319e-17	3.02119866970314e-11	6.79819118070837e-12	0
SYP	3	1	1	0	1	0.333122077407413	0.5173850184809	0	0.385794906780843	2.01529380743588e-26	4.98827543981706e-56	0	3.56402836878149e-31
TF	3	1	0	1	1	0.444273003256718	0	0.839859270360186	0.333534278535902	7.62503064777507e-22	0	1.13042815618409e-57	1.84582004908514e-10
TMSB4X	3	1	1	0	1	0.270696620582021	0.370076247237255	0	0.338067399598349	1.59762839823414e-34	1.90206174267194e-54	0	2.15772476306822e-38
TPT1	3	1	1	0	1	0.289782799319987	0.392571831888806	0	0.327566734540249	3.59571549408097e-22	2.50623952071373e-43	0	3.643816358327e-26
TTYH2	3	1	0	1	1	0.258627274980373	0	0.544078277878047	0.265032975980504	1.28992352558742e-07	0	7.37035560901009e-35	7.60447146417585e-08
TUBA1A	3	0	1	1	1	0	0.311057675880918	0.557683058490726	0.679641090015239	0	4.22662380524098e-31	3.25484310632467e-53	7.43136251248287e-77
UBA52	3	1	1	0	1	0.25829524001973	0.43728697137327	0	0.258937470878018	1.31439479148471e-12	5.43970937699152e-42	0	4.13187222123504e-14
YWHAH	3	0	1	1	1	0	0.251983458880559	0.295796933100898	0.459791805954834	0	2.31317546306064e-21	4.2469523532748e-18	2.34593259130687e-45
ABCA2	2	1	0	1	0	0.382477403540046	0	0.493322839609026	0	4.41384958440362e-16	0	3.65384895006826e-23	0
ADGRG1	2	1	1	0	0	0.287325439067117	0.348949131598623	0	0	1.20968064862697e-09	3.51808511411892e-13	0	0
AGAP2	2	1	1	0	0	0.285912111151834	0.253136196760366	0	0	1.33542319786044e-10	0.00297049724729183	0	0
AHSA1	2	0	1	0	1	0	0.290835576379095	0	0.257690657504105	0	2.33640119368471e-05	0	0.000104786451769109
AIF1	2	0	1	0	1	0	0.428310787505652	0	0.540155661733098	0	7.19252796314891e-18	0	4.8583428527823e-29
AL627171.2	2	1	1	0	0	0.317002085253477	0.257814379191351	0	0	7.44712760424355e-09	0.00143747482486566	0	0
AMER2	2	1	0	1	0	0.280732344765078	0	0.41539068768898	0	2.03114642046894e-08	0	9.21085120064802e-20	0
AMFR	2	1	0	1	0	0.30400531577472	0	0.275726607035287	0	1.71808334433144e-10	0	7.83703216335561e-08	0
ANK2	2	1	1	0	0	0.338496505085063	0.268196737517772	0	0	6.70796453551047e-20	1.19481421037283e-12	0	0
ANKRD40	2	1	0	1	0	0.272476508325717	0	0.272093090481513	0	1.65025082694454e-07	0	5.11175785451154e-10	0
ANLN	2	1	0	1	0	0.257976303925596	0	0.46713785508606	0	3.62660259854155e-08	0	2.09377622070731e-30	0
APOC2	2	0	1	0	1	0	0.273970910818497	0	0.307600038600918	0	1.31145042671659e-07	0	4.2320668312919e-11
APOE	2	1	1	0	0	0.765270857380415	0.639910457224074	0	0	5.68896108499371e-92	8.53703940833233e-73	0	0
APP	2	1	1	0	0	0.348367458402001	0.281631095300477	0	0	3.40598819364458e-30	3.33301840211661e-19	0	0
AQP1	2	0	0	1	1	0	0	0.403958953464528	0.425613154318593	0	0	2.76557487878571e-24	4.68822317116641e-22
ARF1	2	1	0	1	0	0.278984666466276	0	0.26672534581126	0	1.09199044657614e-13	0	3.2040682004781e-11	0
ARL8A	2	1	0	1	0	0.268249404881076	0	0.3282186458386	0	5.03714477177104e-08	0	3.57884705593045e-13	0
ARPP19	2	0	1	0	1	0	0.409936424657555	0	0.304754140960291	0	4.58111194619895e-36	0	3.22236940565114e-19
ATP1A2	2	1	1	0	0	0.519536806500178	0.45947902966945	0	0	1.7498953978173e-44	8.37443439035098e-29	0	0
ATP1A3	2	0	1	0	1	0	0.309102214452744	0	0.251392371185281	0	1.8539815438474e-16	0	1.77190246505579e-09
ATP1B2	2	1	1	0	0	0.36176061356635	0.410404761734995	0	0	3.81039556533626e-15	7.01558587889884e-19	0	0
ATP2C1	2	1	0	1	0	0.256092006831686	0	0.255229786401128	0	2.4768154597571e-07	0	1.38788150883274e-08	0
ATP8A1	2	1	0	1	0	0.307150360207117	0	0.254549895462672	0	2.23828804164377e-10	0	9.32021382755459e-06	0
B2M	2	0	1	0	1	0	0.500989541585193	0	0.375190151425494	0	4.22631634191866e-42	0	5.39187046769235e-22
BCAN	2	1	1	0	0	0.275095453515345	0.270245181140639	0	0	2.15399745629349e-07	7.53872599010736e-06	0	0
BCAS1	2	1	0	1	0	0.464338066693151	0	0.379551712902433	0	5.97294168429568e-24	0	7.39176276706105e-15	0
BIN1	2	1	0	1	0	0.312062585019782	0	0.315352245320986	0	5.00342173637712e-12	0	4.27631267172505e-12	0
BLCAP	2	1	1	0	0	0.414235749138445	0.275096019787612	0	0	4.53132785875451e-24	1.85535872734381e-08	0	0
BST2	2	0	1	0	1	0	0.273625459136993	0	0.276946372856541	0	1.46161105348954e-08	0	3.87771631916987e-10
C14orf132	2	1	1	0	0	0.252404716346074	0.259793766227836	0	0	1.30514850361479e-07	5.96788318644649e-06	0	0
C1orf115	2	1	1	0	0	0.299258130236521	0.352302324138525	0	0	6.63686688048101e-11	3.17425932121227e-10	0	0
C1QA	2	0	1	0	1	0	0.850398306051851	0	0.879903998766467	0	1.02288398442288e-70	0	8.8933632570435e-62
C1QTNF4	2	0	1	0	1	0	0.351573113933392	0	0.292656711586073	0	1.00634723715646e-15	0	3.33482503621666e-10
C1R	2	0	1	0	1	0	0.264340037958913	0	0.380626383323432	0	1.64570878187077e-06	0	4.76335949376535e-18
CA2	2	1	0	1	0	0.273598213434917	0	0.400751122690275	0	1.03754778504156e-06	0	9.23139518199684e-19	0
CACNA1E	2	1	0	1	0	0.280827984960566	0	0.379760153128945	0	8.87390983599869e-08	0	1.10300960747298e-16	0
CACYBP	2	0	1	0	1	0	0.256602404736853	0	0.288665361486529	0	7.42316581758264e-07	0	3.60238009712076e-10
CALM1	2	0	0	1	1	0	0	0.256107051886067	0.339170502235527	0	0	5.8752101754957e-29	1.04492904337538e-46
CALM3	2	0	1	0	1	0	0.306737342559495	0	0.397362660795205	0	4.86671287045562e-39	0	1.68581087363099e-48
CALR	2	0	1	0	1	0	0.627818252598097	0	0.606393566304937	0	5.47370937209507e-46	0	7.3827841503028e-38
CAMK2N1	2	0	1	0	1	0	0.268713449303058	0	0.298590471052226	0	2.10556057877093e-18	0	1.67075846420229e-19
CANX	2	1	1	0	0	0.32015287991667	0.387750006006099	0	0	2.36082680739992e-13	7.25792323195818e-25	0	0
CAPZB	2	1	1	0	0	0.335059189630385	0.284438048713484	0	0	1.98622145858958e-13	2.99671060207033e-06	0	0
CCDC92	2	1	1	0	0	0.330967663366932	0.28246145637256	0	0	7.83911119241571e-16	5.96499410578496e-09	0	0
CCN2	2	1	0	1	0	0.271468138773701	0	0.34512487224498	0	5.98548445958059e-10	0	6.22285545375313e-16	0
CCT5	2	0	0	1	1	0	0	0.288060485343819	0.254843780299637	0	0	3.63621232854105e-11	0.000124560660658551
CD63	2	0	1	0	1	0	0.389169011951277	0	0.279948232191801	0	2.37467600421838e-27	0	4.65656524252057e-14
CD81	2	0	1	0	1	0	0.364135546175233	0	0.324327894265272	0	5.59976404411074e-28	0	2.44168627836598e-20
CD9	2	0	0	1	1	0	0	0.400584892524776	0.327047452085993	0	0	1.7492000394135e-21	3.69826751307164e-12
CDH13	2	1	0	1	0	0.372834127268241	0	0.497137957956216	0	3.73472784210969e-11	0	5.42072730943393e-21	0
CDK17	2	1	0	1	0	0.255146218446623	0	0.326133023544054	0	1.08121629735949e-07	0	2.16629277744436e-16	0
CERCAM	2	1	0	1	0	0.32545445971095	0	0.505177081500974	0	8.41573987781277e-12	0	1.36948076718946e-30	0
CHI3L1	2	0	1	0	1	0	1.31224696198696	0	1.59928802847652	0	2.77824146767246e-114	0	1.52737337058436e-108
CLIC4	2	0	0	1	1	0	0	0.295545480571139	0.327554719345032	0	0	2.63098651190596e-16	1.32295535769483e-14
CLIP3	2	1	1	0	0	0.255226874990938	0.399986093804387	0	0	1.75125938810272e-08	6.36454534802105e-25	0	0
CLSTN2	2	1	0	1	0	0.337508978596572	0	0.484186805609138	0	2.22754101588931e-14	0	7.40995758941514e-26	0
CNIH2	2	1	1	0	0	0.326335677998447	0.282873617890753	0	0	4.68526192168808e-15	6.91939036453283e-08	0	0
CNP	2	1	0	1	0	0.4276010074741	0	0.664155473373899	0	3.96830480252628e-26	0	7.20762623152115e-47	0
CNTN1	2	1	0	1	0	0.442651432819681	0	0.286255837888107	0	1.20814613976371e-27	0	3.63542109246877e-11	0
CNTN2	2	0	0	1	1	0	0	0.429173548115578	0.256711935607817	0	0	2.96388413889049e-24	1.26081153691443e-08
COBL	2	0	0	1	1	0	0	0.375147769892201	0.280230458962884	0	0	1.57718962267744e-19	2.51540950579322e-06
CPLX3	2	1	0	1	0	0.316002773375608	0	0.345704453939605	0	2.52744587865567e-18	0	9.32319131301272e-19	0
CRYM	2	1	0	1	0	0.263800560494295	0	0.303086399290537	0	8.71967855096227e-06	0	3.50160298436501e-09	0
CSF1R	2	0	0	1	1	0	0	0.336328032443026	0.258835446198159	0	0	5.61749560282498e-15	7.82832082029272e-10
CTSB	2	0	1	0	1	0	0.566105240356809	0	0.471152902795003	0	1.53964124541815e-53	0	5.80025681575216e-35
DAAM2	2	1	0	1	0	0.316315713450138	0	0.368630666827505	0	1.00490172848507e-12	0	1.05613962413546e-16	0
DBI	2	1	1	0	0	0.443640075224932	0.556899584829324	0	0	8.13134111638693e-29	1.59509283858917e-43	0	0
DDIT4	2	1	1	0	0	0.283281276504704	0.250895826703733	0	0	2.03124362284965e-09	0.000911522306470962	0	0
DDN	2	0	1	0	1	0	0.491217665260127	0	0.395729817854694	0	1.79598991255623e-29	0	2.33772576048993e-17
DDX6	2	1	1	0	0	0.250957794896242	0.288633612870528	0	0	3.65816241716092e-08	6.95583998590597e-07	0	0
DENND11	2	1	0	1	0	0.273112034244788	0	0.343862816328879	0	4.58379538664376e-12	0	3.43723455763054e-21	0
DIRAS3	2	1	0	1	0	0.287552753522672	0	0.306486733673727	0	9.40605345006487e-13	0	2.25127090837066e-14	0
DNAJA1	2	0	1	0	1	0	0.292889141122332	0	0.446945607166521	0	1.85307366645873e-10	0	2.18877061658953e-23
DNAJA4	2	0	1	0	1	0	0.38765137986812	0	0.351651207381123	0	3.57110823261619e-17	0	1.2856199052425e-14
DNAJB1	2	0	1	0	1	0	0.313684625197969	0	0.446083704000308	0	6.15203429607184e-10	0	4.69940486935347e-20
DPYSL3	2	1	0	1	0	0.272476508325717	0	0.260397050718322	0	6.00568389838225e-07	0	6.23090157434113e-09	0
DPYSL5	2	1	0	1	0	0.264177705511022	0	0.283554810586242	0	1.85146663693112e-12	0	2.65145812997475e-14	0
DTNA	2	0	1	0	1	0	0.530374577765422	0	0.270929918051261	0	2.75271191808896e-35	0	1.49606391255376e-08
EDNRB	2	1	0	1	0	0.396243652914343	0	0.444348654487768	0	3.2373690183622e-25	0	2.37946749501132e-27	0
EEF1A1	2	1	1	0	0	0.359101038115165	0.302682809683885	0	0	1.21175651789958e-57	3.20281938009636e-47	0	0
EEF1D	2	1	1	0	0	0.257451666306516	0.274025226513866	0	0	1.02323367436885e-07	1.87890579074361e-05	0	0
EFHD1	2	1	0	1	0	0.31655531747411	0	0.493658026439479	0	1.91481226992154e-11	0	1.91974388389871e-26	0
EFHD2	2	1	0	1	0	0.307400108924358	0	0.464011725330841	0	1.15447558385806e-10	0	2.59061764259164e-23	0
ELK1	2	1	1	0	0	0.2644580400454	0.297157340903271	0	0	2.63336737416846e-06	5.19877846796761e-07	0	0
ERBIN	2	1	0	1	0	0.386503034961395	0	0.489660209281669	0	3.99930597418025e-18	0	3.17605387731646e-28	0
FABP7	2	1	0	1	0	0.402516033445195	0	0.37525773827001	0	1.83002299815481e-19	0	1.48229984016286e-16	0
FADS2	2	0	0	1	1	0	0	0.333736376121102	0.30734246312068	0	0	7.99187320797334e-15	1.6595729253675e-07
FAIM2	2	1	1	0	0	0.377475025321115	0.392764993149241	0	0	4.3260940879713e-31	1.83889536827192e-36	0	0
FAM107A	2	1	1	0	0	0.542773762338321	0.672737875586213	0	0	4.79132166995131e-57	9.23611046869983e-85	0	0
FAM171B	2	1	0	1	0	0.52432712964896	0	0.340512238487438	0	4.29890467903384e-35	0	1.53196077754901e-13	0
FBXL16	2	1	1	0	0	0.280118884077755	0.369170158799628	0	0	1.92813686308428e-12	8.25587862393887e-25	0	0
FCER1G	2	0	1	0	1	0	0.265571074719613	0	0.41003883909646	0	8.82304003637457e-07	0	1.61799408213644e-19
FCGBP	2	0	1	0	1	0	0.408060013629527	0	0.47012458435138	0	2.13764875356768e-21	0	2.84229434476444e-26
FEZ1	2	1	0	1	0	0.331708321208272	0	0.250002522549945	0	3.45998232475281e-14	0	3.82127305739443e-07	0
FMNL2	2	1	0	1	0	0.323754235966951	0	0.358242581055315	0	3.03335027912644e-13	0	4.66675136337634e-16	0
FTH1	2	0	1	0	1	0	0.321622145397361	0	0.270921811545675	0	1.54104900679982e-75	0	2.76752472599232e-44
GALNT16	2	1	0	1	0	0.326293751914127	0	0.288776960317747	0	1.87102475681465e-13	0	5.46737240614348e-11	0
GJA1	2	1	1	0	0	0.723343744102813	0.673083017536041	0	0	8.68183102568381e-62	7.56386885531891e-61	0	0
GLUD1	2	1	0	1	0	0.406395911431391	0	0.270734244154266	0	2.4533073063596e-20	0	2.3231684179669e-08	0
GPM6A	2	1	1	0	0	0.392804470609914	0.285814616049148	0	0	6.64912871748719e-52	1.93064357840443e-29	0	0
GPR37L1	2	1	1	0	0	0.270626369037556	0.326211229430836	0	0	2.27070275285735e-08	2.85591885810428e-08	0	0
GPRC5B	2	1	0	1	0	0.550062583866022	0	0.292541405641298	0	3.52951410089817e-42	0	1.04083989689743e-12	0
GRIA1	2	1	0	1	0	0.356843547062257	0	0.30386610699307	0	5.8906909902483e-15	0	8.30747372357579e-11	0
GRIA3	2	1	0	1	0	0.357822605996286	0	0.300946553298111	0	3.43126349718096e-15	0	2.07810910041908e-10	0
GRM3	2	1	0	1	0	0.30776131535776	0	0.385123560110103	0	5.90897179115209e-09	0	1.82684477610706e-16	0
HHATL	2	1	0	1	0	0.278726528670889	0	0.41195564264554	0	1.20043946767201e-11	0	1.01806823535114e-25	0
HIP1R	2	1	0	1	0	0.284513612212269	0	0.255337798484797	0	1.35367940931887e-09	0	1.34730062397323e-07	0
HLA-A	2	0	1	0	1	0	0.408719035664714	0	0.288660928223759	0	6.10982633405974e-18	0	6.91849974281091e-07
HLA-B	2	0	1	0	1	0	0.74030347802666	0	0.554889850979089	0	8.63666310022528e-59	0	3.66424592378601e-34
HLA-C	2	1	0	1	0	0.388349917555222	0	0.537062368347135	0	5.99245666407365e-18	0	2.31856117921723e-28	0
HMGCS1	2	0	0	1	1	0	0	0.287766324435682	0.284402582541181	0	0	1.62763864661386e-11	3.67944493496165e-08
HNRNPC	2	0	1	0	1	0	0.337223314218923	0	0.268631646348186	0	1.18740823505013e-13	0	1.24769479337431e-07
[truncated: 665 more rows]

## Sheet: Layer 6_AD_down_DEG
This spreadsheet is derived from DEGs analysis by comparing gene expression between AD and CT from Layer 6. Column A indicates gene ID. Column B indicates the number of overlapping genes from four comparisons. Column G to column J indicates the log fold change of four comparisons.
[truncated: 74 more rows]

[truncated: 2 more sheets: White Matter_AD_up_DEG, White Matter_AD_down_DEG]
