# Supplementary material for: Spatially resolved transcriptomics reveals gene signatures underlying the vulnerability of human middle temporal gyrus in Alzheimer's disease
Source: Research Square preprint supplement (doi:10.21203/rs.3.rs-855234/v1), 2021-09-10
Supplement: Supplementary file 14 [file 65d745c80a96d31d7549bb17.xlsx]

## Sheet: Layer specific markers
The table displays the layer-specific marker from this paper. Those genes are visulized in figure 2 and supplementary figure 1.
Layer 1	Layer 2	Layer 3	Layer 4	Layer 5	Layer 6	White Matter
AL031056.1	ARNT2	ETNPPL	CHMP2B	ACOT7	KRT17	CLDND1
CAPS	C1QL2	MT-ATP6	ESRRA	CD24	SEMA3E	DBNDD2
CD44	CALB2	MT-CYB	GABRA1	PCP4	SYNPR	HIPK2
CNN3	CAMK2N1	TOX3	NGB	RSPO3	NR4A2	MBP
FABP5	GNAL		STRN4	SYN1	PPP3CB	NDRG1
FOS	LRATD1			VAT1L	SYNPO2	PAQR6
ID3	NEUROD1					PTP4A2
RELN	PDE8B					SEPTIN4
RPL36	WFS1					TF
SFRP2
SNORC
ZFP36

## Sheet: Layer 1_up_DEG
The following spreadsheets are derived from DEGs analysis for layer 1 to layer 6, and white matter. In those spreadsheets, column A indicates gene ID. Column B indicates the number of overlapping genes from four samples. Column G to column J indicates the log fold change of four samples in the same order. Column K to column N indicates the p-value. Column O to column R indicates the proportion of…
Gene	contribution summary					logFC (e as base, cutoff >= 0.1)				p-value (Wilcoxon test, cutoff <= 0.05)				proportion of spots express the gene in this layer				mean logFC (e as base) of four samples	GO enrichment analysis									KEGG pathway analysis									Reactome analysis
ID	overlap	CT2.contribute	CT1.contribute	AD1.contribute	AD2.contribute	CT2.Layer 1_up_logFC	CT1.Layer 1_up_logFC	AD1.Layer 1_up_logFC	AD2.Layer 1_up_logFC	CT2.Layer 1_up_pval	CT1.Layer 1_up_pval	AD1.Layer 1_up_pval	AD2.Layer 1_up_pval	CT2.Layer 1_pct.1	CT1.Layer 1_pct.1	AD1.Layer 1_pct.1	AD2.Layer 1_pct.1	mean_logfc	ID	Description	GeneRatio	BgRatio	pvalue	p.adjust	qvalue	geneID	Count	ID	Description	GeneRatio	BgRatio	pvalue	p.adjust	qvalue	geneID	Count	ID	Description	GeneRatio	BgRatio	pvalue	p.adjust	qvalue	geneID	Count
DTNA	2	0	1	0	1	NA	0.508809034763075	NA	0.41416283158939	NA	2.52863958689257e-168	NA	5.51206281275537e-52	NA	0.903	NA	1	0.230743	GO:0031340	positive regulation of vesicle fusion	2/32	12/18866	0.000182018	0.107513	0.080651	ANXA1/ANXA2	2	hsa05166	Human T-cell leukemia virus 1 infection	4/17	219/8108	0.000934418	0.0784911	0.0688518	FOS/HLA-B/HLA-B/HLA-B/HLA-B/HLA-B/HLA-B/ZFP36/CALR	4	R-HSA-983170	Antigen Presentation: Folding, assembly and peptide loading of class I MHC	2/20	25/10704	0.00096974	0.0760619	0.0489951	HLA-B/CALR	2
ID3	2	0	1	0	1	NA	0.536980518851133	NA	0.30819736152615	NA	4.01893475374406e-204	NA	1.82105714791595e-15	NA	0.582	NA	0.425	0.211294	GO:0031392	regulation of prostaglandin biosynthetic process	2/32	12/18866	0.000182018	0.107513	0.080651	FABP5/ANXA1	2	hsa05167	Kaposi sarcoma-associated herpesvirus infection	3/17	194/8108	0.00716084	0.163619	0.143526	FOS/HLA-B/HLA-B/HLA-B/HLA-B/HLA-B/HLA-B/ZFP36	3	R-HSA-6798695	Neutrophil degranulation	5/20	480/10704	0.00157222	0.0760619	0.0489951	CD44/FABP5/HLA-B/S100A11/ANXA2	5
AL031056.1	2	0	1	0	1	NA	0.33806160546846	NA	0.370688187619946	NA	1.53465250462503e-173	NA	4.27083912603934e-48	NA	0.323	NA	0.333	0.177187	GO:2001279	regulation of unsaturated fatty acid biosynthetic process	2/32	14/18866	0.000250433	0.107513	0.080651	FABP5/ANXA1	2	hsa05169	Epstein-Barr virus infection	3/17	202/8108	0.00800518	0.163619	0.143526	CD44/HLA-B/HLA-B/HLA-B/HLA-B/HLA-B/HLA-B/CALR	3	R-HSA-9031628	KEGG pathway analysis+AL2:AT2	2/20	39/10704	0.00235801	0.0760619	0.0489951	ID3/FOS	2
CNN3	2	0	1	0	1	NA	0.404609808451648	NA	0.283816495084569	NA	2.34458111727602e-118	NA	7.64635442550448e-20	NA	0.82	NA	0.858	0.172107	GO:2001224	positive regulation of neuron migration	2/32	16/18866	0.000329542	0.107513	0.080651	RELN/NSMF	2	hsa05170	Human immunodeficiency virus 1 infection	3/17	212/8108	0.00914098	0.163619	0.143526	FOS/HLA-B/HLA-B/HLA-B/HLA-B/HLA-B/HLA-B/CALR	3	R-HSA-445355	Smooth Muscle Contraction	2/20	40/10704	0.00247934	0.0760619	0.0489951	ANXA1/ANXA2	2
MAN1A2	2	0	1	0	1	NA	0.278741141078856	NA	0.371368907894153	NA	2.54331504977314e-31	NA	1.57762173377604e-15	NA	0.645	NA	0.604	0.162528	GO:2001243	negative regulation of intrinsic apoptotic signaling pathway	3/32	98/18866	0.00060431	0.109894	0.0824372	CD44/SFRP2/HSPB1	3	hsa04612	Antigen processing and presentation	2/17	78/8108	0.0113163	0.163619	0.143526	HLA-B/HLA-B/HLA-B/HLA-B/HLA-B/HLA-B/CALR	2	R-HSA-168255	Influenza Infection	3/20	156/10704	0.00288529	0.0760619	0.0489951	RPL41/RPL36/CALR	3
RELN	2	0	1	0	1	NA	0.48700314559006	NA	0.124133249049607	NA	1.67832147777655e-157	NA	4.92917093091727e-06	NA	0.435	NA	0.181	0.152784	GO:0006906	vesicle fusion	3/32	101/18866	0.000659857	0.109894	0.0824372	ANXA1/ANXA2/CALR	3	hsa05171	Coronavirus disease - COVID-19	3/17	232/8108	0.0116871	0.163619	0.143526	FOS/RPL41/RPL36	3	R-HSA-397014	Muscle contraction	3/20	197/10704	0.00555611	0.0760619	0.0489951	FXYD1/ANXA1/ANXA2	3
FXYD1	2	0	1	0	1	NA	0.380249650920412	NA	0.218428979934562	NA	1.00133821081009e-112	NA	4.54105771243547e-17	NA	0.913	NA	0.978	0.14967	GO:0090174	organelle membrane fusion	3/32	107/18866	0.000780506	0.109894	0.0824372	ANXA1/ANXA2/CALR	3	hsa04512	ECM-receptor interaction	2/17	88/8108	0.0142491	0.17099	0.149991	RELN/CD44	2	R-HSA-198725	Nuclear Events (kinase and transcription factor activation)	2/20	61/10704	0.00568193	0.0760619	0.0489951	ID3/FOS	2
CD44	2	0	1	0	1	NA	0.258370358175842	NA	0.331737981214377	NA	3.74388180512728e-66	NA	8.3721772823311e-20	NA	0.29	NA	0.457	0.147527	GO:0051346	negative regulation of hydrolase activity	5/32	473/18866	0.00111634	0.109894	0.0824372	CNN3/CD44/SFRP2/ANXA1/ANXA2	5	hsa05142	Chagas disease	2/17	102/8108	0.0188473	0.197896	0.173593	FOS/CALR	2	R-HSA-9009391	Extra-nuclear estrogen signaling	2/20	77/10704	0.00892402	0.0760619	0.0489951	FOS/HSPB1	2
SNORC	2	0	1	0	1	NA	0.407951178210342	NA	0.179638248473853	NA	2.64615728302318e-85	NA	5.46582131173322e-06	NA	0.679	NA	0.264	0.146897	GO:0001516	prostaglandin biosynthetic process	2/32	30/18866	0.00117701	0.109894	0.0824372	FABP5/ANXA1	2	hsa00910	Nitrogen metabolism	1/17	17/8108	0.0350862	0.293272	0.257256	GLUD1	1	R-HSA-1236974	ER-Phagosome pathway	2/20	83/10704	0.0103096	0.0760619	0.0489951	HLA-B/CALR	2
FOS	2	0	1	0	1	NA	0.287951018017693	NA	0.2689199595554	NA	8.66409701525658e-72	NA	1.29301934221135e-13	NA	0.419	NA	0.296	0.139218	GO:0046457	prostanoid biosynthetic process	2/32	30/18866	0.00117701	0.109894	0.0824372	FABP5/ANXA1	2	hsa04145	Phagosome	2/17	152/8108	0.0394974	0.293272	0.257256	HLA-B/HLA-B/HLA-B/HLA-B/HLA-B/HLA-B/CALR	2	R-HSA-450531	Regulation of mRNA stability by proteins that bind AU-rich elements	2/20	88/10704	0.0115327	0.0760619	0.0489951	HSPB1/ZFP36	2
FABP5	2	0	1	0	1	NA	0.344566159508531	NA	0.201337183755335	NA	4.39986728808162e-41	NA	0.00416009134209627	NA	0.687	NA	0.513	0.136476	GO:0031338	regulation of vesicle fusion	2/32	31/18866	0.00125686	0.109894	0.0824372	ANXA1/ANXA2	2	hsa03010	Ribosome	2/17	158/8108	0.0423762	0.293272	0.257256	RPL41/RPL36	2	R-HSA-156902	Peptide chain elongation	2/20	89/10704	0.0117846	0.0760619	0.0489951	RPL41/RPL36	2
SFRP2	2	0	1	0	1	NA	0.415481183763068	NA	0.104302049100312	NA	1.20513856702393e-161	NA	5.24246128960761e-12	NA	0.361	NA	0.105	0.129946	GO:1902230	negative regulation of intrinsic apoptotic signaling pathway in response to DNA damage	2/32	31/18866	0.00125686	0.109894	0.0824372	CD44/SFRP2	2	hsa00220	Arginine biosynthesis	1/17	22/8108	0.0451831	0.293272	0.257256	GLUD1	1	R-HSA-192823	Viral mRNA Translation	2/20	89/10704	0.0117846	0.0760619	0.0489951	RPL41/RPL36	2
SCRG1	2	0	1	0	1	NA	0.285498729489111	NA	0.221869550212659	NA	6.87574037500791e-57	NA	1.12109128761593e-13	NA	0.767	NA	0.834	0.126842	GO:0043312	neutrophil degranulation	5/32	487/18866	0.00127091	0.109894	0.0824372	CD44/FABP5/HLA-B/S100A11/ANXA2	5	hsa04964	Proximal tubule bicarbonate reclamation	1/17	23/8108	0.0471905	0.293272	0.257256	GLUD1	1	R-HSA-877300	Interferon gamma signaling	2/20	91/10704	0.0122959	0.0760619	0.0489951	CD44/HLA-B	2
HLA-B	2	1	1	0	0	0.142640427456353	0.360862465583601	NA	NA	0.0079248371630469	5.33624612380371e-78	NA	NA	0.879	0.761	NA	NA	0.125876	GO:0002283	neutrophil activation involved in immune response	5/32	490/18866	0.001306	0.109894	0.0824372	CD44/FABP5/HLA-B/S100A11/ANXA2	5	hsa04141	Protein processing in endoplasmic reticulum	2/17	171/8108	0.0488786	0.293272	0.257256	MAN1A2/CALR	2	R-HSA-156842	Eukaryotic Translation Elongation	2/20	93/10704	0.0128168	0.0760619	0.0489951	RPL41/RPL36	2
LIX1	2	0	1	0	1	NA	0.373147484387781	NA	0.120427643265373	NA	3.17209819999473e-160	NA	0.00826024421781956	NA	0.387	NA	0.237	0.123394	GO:0010165	response to X-ray	2/32	32/18866	0.00133923	0.109894	0.0824372	SFRP2/ANXA1	2										R-HSA-2408557	Selenocysteine synthesis	2/20	93/10704	0.0128168	0.0760619	0.0489951	RPL41/RPL36	2
RPL41	2	0	1	0	1	NA	0.296963541329486	NA	0.189377451410705	NA	1.68478088176996e-186	NA	2.36048350530146e-39	NA	1	NA	1	0.121585	GO:0022604	regulation of cell morphogenesis	5/32	499/18866	0.00141561	0.109894	0.0824372	RELN/CD44/ANXA1/NSMF/CALR	5										R-HSA-72764	Eukaryotic Translation Termination	2/20	93/10704	0.0128168	0.0760619	0.0489951	RPL41/RPL36	2
CAPS	2	0	1	0	1	NA	0.29378804794616	NA	0.187016858506755	NA	6.20091314734344e-102	NA	2.26156772596148e-09	NA	0.28	NA	0.222	0.120201	GO:0010595	positive regulation of endothelial cell migration	3/32	132/18866	0.00143157	0.109894	0.0824372	HSPB1/ANXA1/CALR	3										R-HSA-975956	Nonsense Mediated Decay (NMD) independent of the Exon Junction Complex (EJC)	2/20	95/10704	0.0133472	0.0760619	0.0489951	RPL41/RPL36	2
MTRNR2L1	2	0	1	0	1	NA	0.327244016454875	NA	0.1301106642536	NA	1.86756351113351e-89	NA	0.00463137831227558	NA	0.497	NA	0.557	0.114339	GO:0048284	organelle fusion	3/32	140/18866	0.00169456	0.122856	0.0921603	ANXA1/ANXA2/CALR	3										R-HSA-1236975	Antigen processing-Cross presentation	2/20	98/10704	0.0141607	0.0760619	0.0489951	HLA-B/CALR	2
S100A11	2	0	1	0	1	NA	0.250361606105987	NA	0.206453182858885	NA	6.21891458313024e-53	NA	7.69526815724353e-06	NA	0.356	NA	0.531	0.114204	GO:0051384	response to glucocorticoid	3/32	147/18866	0.00194798	0.129586	0.0972088	FOS/ZFP36/ANXA1	3										R-HSA-72689	Formation of a pool of free 40S subunits	2/20	101/10704	0.0149954	0.0760619	0.0489951	RPL41/RPL36	2
RPL36	2	0	1	0	1	NA	0.300298554601675	NA	0.150936612581174	NA	5.84612572663237e-139	NA	1.11607092122048e-16	NA	0.999	NA	1	0.112809	GO:1902229	regulation of intrinsic apoptotic signaling pathway in response to DNA damage	2/32	39/18866	0.00198599	0.129586	0.0972088	CD44/SFRP2	2										R-HSA-9633012	Response of EIF2AK4 (GCN2) to amino acid deficiency	2/20	101/10704	0.0149954	0.0760619	0.0489951	RPL41/RPL36	2
TRIM47	2	0	1	0	1	NA	0.272077491005518	NA	0.134275908570868	NA	6.76568487934011e-63	NA	0.00969945961650776	NA	0.444	NA	0.296	0.101588	GO:2001222	regulation of neuron migration	2/32	45/18866	0.00263657	0.14291	0.107204	RELN/NSMF	2										R-HSA-6785807	Interleukin-4 and Interleukin-13 signaling	2/20	108/10704	0.0170239	0.0760619	0.0489951	FOS/ANXA1	2
GLUD1	2	0	1	0	1	NA	0.277411980526634	NA	0.10164657214902	NA	5.3835214627056e-59	NA	0.00372188879625431	NA	0.838	NA	0.895	0.0947646	GO:0031960	response to corticosteroid	3/32	164/18866	0.00265841	0.14291	0.107204	FOS/ZFP36/ANXA1	3										R-HSA-9006931	Signaling by Nuclear Receptors	3/20	299/10704	0.0172971	0.0760619	0.0489951	FOS/FABP5/HSPB1	3
TAGLN	2	0	1	0	1	NA	0.122133795215671	NA	0.249945182297354	NA	2.99821458265704e-12	NA	0.00517423467201933	NA	0.148	NA	0.2	0.0930197	GO:0048545	response to steroid hormone	4/32	346/18866	0.00266517	0.14291	0.107204	FOS/ZFP36/ANXA1/CALR	4										R-HSA-156827	L13a-mediated translational silencing of Ceruloplasmin expression	2/20	111/10704	0.0179274	0.0760619	0.0489951	RPL41/RPL36	2
EMP3	2	0	1	0	1	NA	0.154373521053807	NA	0.216130518697085	NA	2.40866109064165e-36	NA	2.71379564685595e-07	NA	0.253	NA	0.333	0.092626	GO:2001242	regulation of intrinsic apoptotic signaling pathway	3/32	166/18866	0.00275116	0.14291	0.107204	CD44/SFRP2/HSPB1	3										R-HSA-1799339	SRP-dependent cotranslational protein targeting to membrane	2/20	112/10704	0.018233	0.0760619	0.0489951	RPL41/RPL36	2
HSPB1	2	0	1	0	1	NA	0.200878279032206	NA	0.158541041684858	NA	8.76259274491408e-43	NA	1.22053645237016e-15	NA	0.953	NA	1	0.0898548	GO:0061025	membrane fusion	3/32	169/18866	0.002894	0.14291	0.107204	ANXA1/ANXA2/CALR	3										R-HSA-72706	GTP hydrolysis and joining of the 60S ribosomal subunit	2/20	112/10704	0.018233	0.0760619	0.0489951	RPL41/RPL36	2
ZFP36	2	0	1	0	1	NA	0.227072895684636	NA	0.128445606110198	NA	1.10914647066839e-26	NA	0.00103942799618741	NA	0.55	NA	0.213	0.0888796	GO:0006692	prostanoid metabolic process	2/32	49/18866	0.00311872	0.14291	0.107204	FABP5/ANXA1	2										R-HSA-381183	ATF6 (ATF6-alpha) activates chaperone genes	1/20	10/10704	0.018536	0.0760619	0.0489951	CALR	1
LINC01094	2	0	1	0	1	NA	0.110252007684097	NA	0.206631259264992	NA	1.17360041300311e-42	NA	2.17651478323532e-13	NA	0.122	NA	0.23	0.0792208	GO:0006693	prostaglandin metabolic process	2/32	49/18866	0.00311872	0.14291	0.107204	FABP5/ANXA1	2										R-HSA-419771	Opsins	1/20	10/10704	0.018536	0.0760619	0.0489951	RGR	1
RAMP1	2	0	1	0	1	NA	0.14509652445698	NA	0.165712060845063	NA	1.41447757903706e-09	NA	1.92850939410388e-09	NA	0.639	NA	0.863	0.0777021	GO:0032663	regulation of interleukin-2 production	2/32	49/18866	0.00311872	0.14291	0.107204	ZFP36/ANXA1	2										R-HSA-419812	Calcitonin-like ligand receptors	1/20	10/10704	0.018536	0.0760619	0.0489951	RAMP1	1
ANXA1	2	0	1	0	1	NA	0.114893051028859	NA	0.192741034069725	NA	3.06587999271569e-21	NA	7.18736430173636e-12	NA	0.179	NA	0.218	0.0769085	GO:0010634	positive regulation of epithelial cell migration	3/32	176/18866	0.0032449	0.14291	0.107204	HSPB1/ANXA1/CALR	3										R-HSA-450341	Activation of the AP-1 family of transcription factors	1/20	10/10704	0.018536	0.0760619	0.0489951	FOS	1
NSMF	2	0	1	0	1	NA	0.192442914521153	NA	0.10115002254723	NA	2.04834401943325e-31	NA	0.000202767279022062	NA	0.803	NA	0.946	0.0733982	GO:0019083	viral transcription	3/32	178/18866	0.00334974	0.14291	0.107204	RPL41/RPL36/ZFP36	3										R-HSA-187037	Signaling by NTRK1 (TRKA)	2/20	115/10704	0.0191633	0.0760619	0.0489951	ID3/FOS	2
ANXA2	2	0	1	0	1	NA	0.161068268719662	NA	0.132173202730747	NA	3.38610654497525e-31	NA	0.00128330723153438	NA	0.251	NA	0.222	0.0733104	GO:0006402	mRNA catabolic process	4/32	376/18866	0.00359207	0.14291	0.107204	RPL41/RPL36/HSPB1/ZFP36	4										R-HSA-927802	Nonsense-Mediated Decay (NMD)	2/20	115/10704	0.0191633	0.0760619	0.0489951	RPL41/RPL36	2
CALR	2	0	1	0	1	NA	0.165283086299167	NA	0.125428849610099	NA	8.4368924196557e-17	NA	2.80687327910637e-05	NA	0.716	NA	0.983	0.072678	GO:0032623	interleukin-2 production	2/32	54/18866	0.00377499	0.14291	0.107204	ZFP36/ANXA1	2										R-HSA-975957	Nonsense Mediated Decay (NMD) enhanced by the Exon Junction Complex (EJC)	2/20	115/10704	0.0191633	0.0760619	0.0489951	RPL41/RPL36	2
OST4	2	0	1	0	1	NA	0.119759029457086	NA	0.134172780124807	NA	7.90991788447704e-13	NA	3.57909822257372e-07	NA	0.7	NA	0.883	0.063483	GO:0030199	collagen fibril organization	2/32	55/18866	0.00391331	0.14291	0.107204	SFRP2/ANXA2	2										R-HSA-2408522	Selenoamino acid metabolism	2/20	118/10704	0.0201135	0.0760619	0.0489951	RPL41/RPL36	2
BAALC-AS1	2	0	1	0	1	NA	0.143247475387524	NA	0.101868383816547	NA	4.292386021715e-24	NA	0.00392455999471859	NA	0.27	NA	0.178	0.061279	GO:0042304	regulation of fatty acid biosynthetic process	2/32	55/18866	0.00391331	0.14291	0.107204	FABP5/ANXA1	2										R-HSA-1236977	Endosomal/Vacuolar pathway	1/20	11/10704	0.0203716	0.0760619	0.0489951	HLA-B	1
RGR	2	0	1	0	1	NA	0.103443454693036	NA	0.119649013841169	NA	1.80703947218354e-22	NA	0.00116540086697318	NA	0.153	NA	0.142	0.0557731	GO:0006413	translational initiation	3/32	192/18866	0.00414216	0.14291	0.107204	RPL41/RPL36/HSPB1	3										R-HSA-72613	Eukaryotic Translation Initiation	2/20	119/10704	0.0204345	0.0760619	0.0489951	RPL41/RPL36	2
AQP4	1	0	1	0	0	NA	0.782346695746885	NA	NA	NA	4.81819445520204e-308	NA	NA	NA	0.994	NA	NA	0.195587	GO:0019080	viral gene expression	3/32	195/18866	0.00432553	0.14291	0.107204	RPL41/RPL36/ZFP36	3										R-HSA-72737	Cap-dependent Translation Initiation	2/20	119/10704	0.0204345	0.0760619	0.0489951	RPL41/RPL36	2
LINC00632	1	0	1	0	0	NA	0.561747028791305	NA	NA	NA	3.00650977775999e-71	NA	NA	NA	0.704	NA	NA	0.140437	GO:0042493	response to drug	4/32	397/18866	0.00435839	0.14291	0.107204	FOS/SFRP2/ANXA1/CALR	4										R-HSA-2160916	Hyaluronan uptake and degradation	1/20	12/10704	0.0222038	0.0782977	0.0504353	CD44	1
FABP7	1	0	1	0	0	NA	0.559119635528265	NA	NA	NA	3.84385911807342e-134	NA	NA	NA	0.733	NA	NA	0.13978	GO:0051216	cartilage development	3/32	197/18866	0.00445049	0.14291	0.107204	CD44/SNORC/SFRP2	3										R-HSA-381033	ATF6 (ATF6-alpha) activates chaperones	1/20	12/10704	0.0222038	0.0782977	0.0504353	CALR	1
MALAT1	1	0	1	0	0	NA	0.537957100339391	NA	NA	NA	7.59228575574718e-166	NA	NA	NA	0.998	NA	NA	0.134489	GO:0006636	unsaturated fatty acid biosynthetic process	2/32	59/18866	0.00448988	0.14291	0.107204	FABP5/ANXA1	2										R-HSA-75205	Dissolution of Fibrin Clot	1/20	13/10704	0.0240329	0.08251	0.0531486	ANXA2	1
SLC14A1	1	0	1	0	0	NA	0.438923456899378	NA	NA	NA	1.86127878480645e-130	NA	NA	NA	0.547	NA	NA	0.109731	GO:0046456	icosanoid biosynthetic process	2/32	59/18866	0.00448988	0.14291	0.107204	FABP5/ANXA1	2										R-HSA-166520	Signaling by NTRKs	2/20	134/10704	0.0255065	0.08251	0.0531486	ID3/FOS	2
TJP2	1	0	1	0	0	NA	0.424130898641752	NA	NA	NA	8.53830865738658e-148	NA	NA	NA	0.471	NA	NA	0.106033	GO:0071385	cellular response to glucocorticoid stimulus	2/32	59/18866	0.00448988	0.14291	0.107204	ZFP36/ANXA1	2										R-HSA-8964539	Glutamate and glutamine metabolism	1/20	14/10704	0.0258586	0.08251	0.0531486	GLUD1	1
C1QA	1	0	1	0	0	NA	0.391796847031842	NA	NA	NA	5.78698478925708e-111	NA	NA	NA	0.528	NA	NA	0.0979492	GO:0071384	cellular response to corticosteroid stimulus	2/32	62/18866	0.00494654	0.150134	0.112623	ZFP36/ANXA1	2										R-HSA-168273	Influenza Viral RNA Transcription and Replication	2/20	135/10704	0.0258613	0.08251	0.0531486	RPL41/RPL36	2
GADD45A	1	0	1	0	0	NA	0.390820615289699	NA	NA	NA	5.00734440721889e-100	NA	NA	NA	0.574	NA	NA	0.0977052	GO:0071383	cellular response to steroid hormone stimulus	3/32	206/18866	0.00503996	0.150134	0.112623	ZFP36/ANXA1/CALR	3										R-HSA-3772470	Negative regulation of TCF-dependent signaling by WNT ligand antagonists	1/20	15/10704	0.0276812	0.0862622	0.0555656	SFRP2	1
CD14	1	0	1	0	0	NA	0.383810354676091	NA	NA	NA	1.10984017833476e-114	NA	NA	NA	0.516	NA	NA	0.0959526	GO:0006401	RNA catabolic process	4/32	415/18866	0.00509788	0.150134	0.112623	RPL41/RPL36/HSPB1/ZFP36	4										R-HSA-71291	Metabolism of amino acids and derivatives	3/20	374/10704	0.0310294	0.0912263	0.0587632	RPL41/RPL36/GLUD1	3
LRP4	1	0	1	0	0	NA	0.38081527801536	NA	NA	NA	1.28824825301013e-112	NA	NA	NA	0.514	NA	NA	0.0952038	GO:0045766	positive regulation of angiogenesis	3/32	208/18866	0.00517705	0.150134	0.112623	SFRP2/HSPB1/ANXA1	3										R-HSA-2142845	Hyaluronan metabolism	1/20	17/10704	0.0313165	0.0912263	0.0587632	CD44	1
FBXO2	1	0	1	0	0	NA	0.369304104450649	NA	NA	NA	2.02007895009659e-114	NA	NA	NA	0.887	NA	NA	0.092326	GO:0000956	nuclear-transcribed mRNA catabolic process	3/32	210/18866	0.00531638	0.150823	0.11314	RPL41/RPL36/ZFP36	3										R-HSA-450513	Tristetraprolin (TTP, ZFP36) binds and destabilizes mRNA	1/20	17/10704	0.0313165	0.0912263	0.0587632	ZFP36	1
ID1	1	0	1	0	0	NA	0.355949847870307	NA	NA	NA	2.83912360143275e-107	NA	NA	NA	0.477	NA	NA	0.0889875	GO:0045785	positive regulation of cell adhesion	4/32	428/18866	0.00568175	0.157759	0.118343	CD44/SFRP2/ANXA1/CALR	4										R-HSA-3000480	Scavenging by Class A Receptors	1/20	19/10704	0.0349389	0.0996131	0.0641656	CALR	1
HLA-A	1	0	1	0	0	NA	0.35231701187437	NA	NA	NA	2.04571126734073e-84	NA	NA	NA	0.771	NA	NA	0.0880793	GO:0009314	response to radiation	4/32	447/18866	0.00661355	0.163714	0.12281	FOS/SFRP2/ANXA1/RGR	4										R-HSA-9010553	Regulation of expression of SLITs and ROBOs	2/20	171/10704	0.0399315	0.111476	0.0718067	RPL41/RPL36	2
NFIA	1	0	1	0	0	NA	0.344498777671995	NA	NA	NA	4.55747496499663e-94	NA	NA	NA	0.455	NA	NA	0.0861247	GO:0045600	positive regulation of fat cell differentiation	2/32	72/18866	0.00661595	0.163714	0.12281	SFRP2/ZFP36	2										R-HSA-163560	Triglyceride catabolism	1/20	24/10704	0.0439388	0.117756	0.0758522	FABP5	1
JUNB	1	0	1	0	0	NA	0.33617519221089	NA	NA	NA	5.40867967105805e-89	NA	NA	NA	0.505	NA	NA	0.0840438	GO:2001234	negative regulation of apoptotic signaling pathway	3/32	233/18866	0.00708295	0.163714	0.12281	CD44/SFRP2/HSPB1	3										R-HSA-9634638	Estrogen-dependent nuclear events downstream of ESR-membrane signaling	1/20	24/10704	0.0439388	0.117756	0.0758522	FOS	1
GASK1B	1	0	1	0	0	NA	0.331499575951834	NA	NA	NA	4.50089337454816e-97	NA	NA	NA	0.405	NA	NA	0.0828749	GO:0002479	antigen processing and presentation of exogenous peptide antigen via MHC class I, TAP-dependent	2/32	75/18866	0.00716014	0.163714	0.12281	HLA-B/CALR	2										R-HSA-6791226	Major pathway of rRNA processing in the nucleolus and cytosol	2/20	184/10704	0.0455922	0.119791	0.0771632	RPL41/RPL36	2
FAM181B	1	0	1	0	0	NA	0.330414982256365	NA	NA	NA	7.01047667845158e-85	NA	NA	NA	0.423	NA	NA	0.0826037	GO:0015909	long-chain fatty acid transport	2/32	75/18866	0.00716014	0.163714	0.12281	FABP5/ANXA1	2										R-HSA-901042	Calnexin/calreticulin cycle	1/20	26/10704	0.0475164	0.122446	0.0788733	CALR	1
HAMP	1	0	1	0	0	NA	0.327123562903039	NA	NA	NA	1.99684893505466e-55	NA	NA	NA	0.697	NA	NA	0.0817809	GO:0035924	cellular response to vascular endothelial growth factor stimulus	2/32	75/18866	0.00716014	0.163714	0.12281	HSPB1/ANXA1	2
VSIR	1	0	1	0	0	NA	0.324119610696125	NA	NA	NA	3.42632843476057e-76	NA	NA	NA	0.459	NA	NA	0.0810299	GO:1904018	positive regulation of vasculature development	3/32	235/18866	0.00725112	0.163714	0.12281	SFRP2/HSPB1/ANXA1	3
PLEC	1	0	1	0	0	NA	0.316134441327444	NA	NA	NA	5.46110392276768e-47	NA	NA	NA	0.724	NA	NA	0.0790336	GO:0008306	associative learning	2/32	76/18866	0.00734591	0.163714	0.12281	RELN/FOS	2
HLA-DRB1	1	0	1	0	0	NA	0.315808309071885	NA	NA	NA	2.40642658593037e-76	NA	NA	NA	0.452	NA	NA	0.0789521	GO:0010594	regulation of endothelial cell migration	3/32	238/18866	0.0075078	0.163714	0.12281	HSPB1/ANXA1/CALR	3
PPP1R1B	1	0	1	0	0	NA	0.310026520922073	NA	NA	NA	9.34724974971911e-64	NA	NA	NA	0.774	NA	NA	0.0775066	GO:0043536	positive regulation of blood vessel endothelial cell migration	2/32	79/18866	0.00791627	0.163714	0.12281	HSPB1/ANXA1	2
IL17D	1	0	1	0	0	NA	0.309513076631796	NA	NA	NA	3.22650099891431e-81	NA	NA	NA	0.438	NA	NA	0.0773783	GO:0042590	antigen processing and presentation of exogenous peptide antigen via MHC class I	2/32	80/18866	0.0081107	0.163714	0.12281	HLA-B/CALR	2
FCGR3A	1	0	1	0	0	NA	0.298047515624359	NA	NA	NA	2.16418490030314e-77	NA	NA	NA	0.424	NA	NA	0.0745119	GO:2001021	negative regulation of response to DNA damage stimulus	2/32	83/18866	0.00870686	0.163714	0.12281	CD44/SFRP2	2
F3	1	0	1	0	0	NA	0.297681000641643	NA	NA	NA	8.87367389241238e-40	NA	NA	NA	0.679	NA	NA	0.0744203	GO:0006486	protein glycosylation	3/32	252/18866	0.00877688	0.163714	0.12281	MAN1A2/RAMP1/OST4	3
CYBA	1	0	1	0	0	NA	0.284441601038703	NA	NA	NA	2.51800441481949e-80	NA	NA	NA	0.384	NA	NA	0.0711104	GO:0043413	macromolecule glycosylation	3/32	252/18866	0.00877688	0.163714	0.12281	MAN1A2/RAMP1/OST4	3
VCAN	1	0	1	0	0	NA	0.282249539807025	NA	NA	NA	3.0048610802326e-92	NA	NA	NA	0.333	NA	NA	0.0705624	GO:0032092	positive regulation of protein binding	2/32	85/18866	0.00911494	0.163714	0.12281	RAMP1/ANXA2	2
TMEM123	1	0	1	0	0	NA	0.275102027829858	NA	NA	NA	1.99294739900048e-78	NA	NA	NA	0.398	NA	NA	0.0687755	GO:0035418	protein localization to synapse	2/32	85/18866	0.00911494	0.163714	0.12281	RELN/HSPB1	2
PHYHD1	1	0	1	0	0	NA	0.27510165071834	NA	NA	NA	9.87241522614203e-87	NA	NA	NA	0.331	NA	NA	0.0687754	GO:0043154	negative regulation of cysteine-type endopeptidase activity involved in apoptotic process	2/32	85/18866	0.00911494	0.163714	0.12281	CD44/SFRP2	2
SLC7A2	1	0	1	0	0	NA	0.273942761916541	NA	NA	NA	1.16471341838464e-84	NA	NA	NA	0.335	NA	NA	0.0684857	GO:0010951	negative regulation of endopeptidase activity	3/32	258/18866	0.00935711	0.163714	0.12281	CD44/SFRP2/ANXA2	3
HADHB	1	0	1	0	0	NA	0.273554310295319	NA	NA	NA	1.08972150286224e-62	NA	NA	NA	0.477	NA	NA	0.0683886	GO:1903706	regulation of hemopoiesis	4/32	498/18866	0.00960572	0.163714	0.12281	FOS/HLA-B/ZFP36/ANXA1	4
NPC2	1	0	1	0	0	NA	0.273340544902634	NA	NA	NA	1.90005855655955e-61	NA	NA	NA	0.448	NA	NA	0.0683351	GO:0061448	connective tissue development	3/32	262/18866	0.00975618	0.163714	0.12281	CD44/SNORC/SFRP2	3
DPYSL3	1	0	1	0	0	NA	0.271653051760489	NA	NA	NA	1.01758176768206e-58	NA	NA	NA	0.465	NA	NA	0.0679133	GO:0050730	regulation of peptidyl-tyrosine phosphorylation	3/32	263/18866	0.00985749	0.163714	0.12281	RELN/CD44/SFRP2	3
EMX2	1	0	1	0	0	NA	0.271080914028452	NA	NA	NA	2.18953414327003e-73	NA	NA	NA	0.349	NA	NA	0.0677702	GO:0070085	glycosylation	3/32	265/18866	0.010062	0.163714	0.12281	MAN1A2/RAMP1/OST4	3
SCG3	1	0	1	0	0	NA	0.266600679554313	NA	NA	NA	1.30277957263655e-55	NA	NA	NA	0.837	NA	NA	0.0666502	GO:0030901	midbrain development	2/32	91/18866	0.0103896	0.163714	0.12281	SFRP2/GLUD1	2
PBXIP1	1	0	1	0	0	NA	0.266474846221203	NA	NA	NA	4.09250490421264e-30	NA	NA	NA	0.565	NA	NA	0.0666187	GO:0060333	interferon-gamma-mediated signaling pathway	2/32	91/18866	0.0103896	0.163714	0.12281	CD44/HLA-B	2
FGF2	1	0	1	0	0	NA	0.266280125272586	NA	NA	NA	3.57682060997591e-68	NA	NA	NA	0.393	NA	NA	0.06657	GO:0010466	negative regulation of peptidase activity	3/32	272/18866	0.0107971	0.163714	0.12281	CD44/SFRP2/ANXA2	3
CDKN1A	1	0	1	0	0	NA	0.263663989287623	NA	NA	NA	7.14682862653369e-68	NA	NA	NA	0.399	NA	NA	0.065916	GO:2000117	negative regulation of cysteine-type endopeptidase activity	2/32	93/18866	0.0108311	0.163714	0.12281	CD44/SFRP2	2
YBX3	1	0	1	0	0	NA	0.262628625413098	NA	NA	NA	1.38578079866151e-65	NA	NA	NA	0.414	NA	NA	0.0656572	GO:0048814	regulation of dendrite morphogenesis	2/32	95/18866	0.0112808	0.163714	0.12281	RELN/NSMF	2
MGST1	1	0	0	0	1	NA	NA	NA	0.261027350220925	NA	NA	NA	6.1397860916587e-19	NA	NA	NA	0.978	0.0652568	GO:0030316	osteoclast differentiation	2/32	98/18866	0.0119706	0.163714	0.12281	FOS/ANXA2	2
RASL12	1	0	1	0	0	NA	0.260103435259646	NA	NA	NA	3.64820358044563e-91	NA	NA	NA	0.285	NA	NA	0.0650259	GO:0002474	antigen processing and presentation of peptide antigen via MHC class I	2/32	99/18866	0.0122046	0.163714	0.12281	HLA-B/CALR	2
NUPR1	1	0	1	0	0	NA	0.256226398628127	NA	NA	NA	1.21668431987185e-36	NA	NA	NA	0.581	NA	NA	0.0640566	GO:0043542	endothelial cell migration	3/32	286/18866	0.0123594	0.163714	0.12281	HSPB1/ANXA1/CALR	3
IFI27	1	0	1	0	0	NA	0.25615621536375	NA	NA	NA	7.2099370517195e-43	NA	NA	NA	0.41	NA	NA	0.0640391	GO:0015908	fatty acid transport	2/32	101/18866	0.0126785	0.163714	0.12281	FABP5/ANXA1	2
SLC20A2	1	0	1	0	0	NA	0.256127448669384	NA	NA	NA	3.27021922415928e-54	NA	NA	NA	0.38	NA	NA	0.0640319	GO:0019217	regulation of fatty acid metabolic process	2/32	101/18866	0.0126785	0.163714	0.12281	FABP5/ANXA1	2
ALDH6A1	1	0	1	0	0	NA	0.254105799162002	NA	NA	NA	1.10777764701372e-31	NA	NA	NA	0.631	NA	NA	0.0635264	GO:0097193	intrinsic apoptotic signaling pathway	3/32	290/18866	0.0128284	0.163714	0.12281	CD44/SFRP2/HSPB1	3
ITGB8	1	0	1	0	0	NA	0.253108593512276	NA	NA	NA	3.45440459545748e-63	NA	NA	NA	0.455	NA	NA	0.0632771	GO:1902105	regulation of leukocyte differentiation	3/32	290/18866	0.0128284	0.163714	0.12281	FOS/HLA-B/ANXA1	3
RIDA	1	0	1	0	0	NA	0.25266889280741	NA	NA	NA	2.89384203973426e-40	NA	NA	NA	0.529	NA	NA	0.0631672	GO:0002181	cytoplasmic translation	2/32	103/18866	0.0131605	0.163714	0.12281	RPL41/RPL36	2
TIMP1	1	0	1	0	0	NA	0.252588476102624	NA	NA	NA	7.12344832216504e-53	NA	NA	NA	0.382	NA	NA	0.0631471	GO:0008630	intrinsic apoptotic signaling pathway in response to DNA damage	2/32	103/18866	0.0131605	0.163714	0.12281	CD44/SFRP2	2
IFITM2	1	0	1	0	0	NA	0.252221271321548	NA	NA	NA	1.46398611381752e-38	NA	NA	NA	0.694	NA	NA	0.0630553	GO:1901570	fatty acid derivative biosynthetic process	2/32	103/18866	0.0131605	0.163714	0.12281	FABP5/ANXA1	2
BST2	1	0	1	0	0	NA	0.250511728431945	NA	NA	NA	4.10448993404959e-69	NA	NA	NA	0.366	NA	NA	0.0626279	GO:0051348	negative regulation of transferase activity	3/32	296/18866	0.0135511	0.163714	0.12281	SFRP2/HSPB1/ZFP36	3
ZFP36L2	1	0	1	0	0	NA	0.250217526089388	NA	NA	NA	1.8821098894901e-55	NA	NA	NA	0.393	NA	NA	0.0625544	GO:0002824	positive regulation of adaptive immune response based on somatic recombination of immune receptors built from immunoglobulin superfamily domains	2/32	105/18866	0.0136504	0.163714	0.12281	HLA-B/ANXA1	2
TAGLN2	1	0	1	0	0	NA	0.247489240450928	NA	NA	NA	8.21370762612632e-54	NA	NA	NA	0.381	NA	NA	0.0618723	GO:0006614	SRP-dependent cotranslational protein targeting to membrane	2/32	105/18866	0.0136504	0.163714	0.12281	RPL41/RPL36	2
CD63	1	0	1	0	0	NA	0.247366947348771	NA	NA	NA	4.55860811167976e-58	NA	NA	NA	0.92	NA	NA	0.0618417	GO:1902414	protein localization to cell junction	2/32	105/18866	0.0136504	0.163714	0.12281	RELN/HSPB1	2
ZNF385A	1	0	1	0	0	NA	0.247236226473627	NA	NA	NA	1.20330823311183e-61	NA	NA	NA	0.403	NA	NA	0.0618091	GO:0014812	muscle cell migration	2/32	106/18866	0.0138983	0.163714	0.12281	S100A11/ANXA1	2
NAMPT	1	0	1	0	0	NA	0.244983683730715	NA	NA	NA	4.61993785597559e-45	NA	NA	NA	0.408	NA	NA	0.0612459	GO:0010632	regulation of epithelial cell migration	3/32	301/18866	0.0141708	0.163714	0.12281	HSPB1/ANXA1/CALR	3
LAPTM5	1	0	1	0	0	NA	0.244152843257661	NA	NA	NA	2.38058397227629e-65	NA	NA	NA	0.364	NA	NA	0.0610382	GO:0006613	cotranslational protein targeting to membrane	2/32	109/18866	0.0146537	0.163714	0.12281	RPL41/RPL36	2
SLC2A5	1	0	1	0	0	NA	0.244003983892271	NA	NA	NA	9.50768310312988e-71	NA	NA	NA	0.322	NA	NA	0.061001	GO:0033138	positive regulation of peptidyl-serine phosphorylation	2/32	109/18866	0.0146537	0.163714	0.12281	CD44/SFRP2	2
S100A9	1	0	1	0	0	NA	0.242969337748408	NA	NA	NA	9.1495400208078e-52	NA	NA	NA	0.381	NA	NA	0.0607423	GO:0002821	positive regulation of adaptive immune response	2/32	110/18866	0.0149095	0.163714	0.12281	HLA-B/ANXA1	2
PFKFB2	1	0	1	0	0	NA	0.241775402786008	NA	NA	NA	8.59461389984608e-68	NA	NA	NA	0.332	NA	NA	0.0604439	GO:0032652	regulation of interleukin-1 production	2/32	111/18866	0.0151671	0.163714	0.12281	HSPB1/ANXA1	2
CSF1R	1	0	1	0	0	NA	0.24167041696723	NA	NA	NA	7.29255041930171e-74	NA	NA	NA	0.323	NA	NA	0.0604176	GO:0010769	regulation of cell morphogenesis involved in differentiation	3/32	310/18866	0.0153268	0.163714	0.12281	RELN/NSMF/CALR	3
SLC18B1	1	0	1	0	0	NA	0.241519643257571	NA	NA	NA	6.2905779823445e-63	NA	NA	NA	0.369	NA	NA	0.0603799	GO:0034599	cellular response to oxidative stress	3/32	310/18866	0.0153268	0.163714	0.12281	FOS/HSPB1/ANXA1	3
HSPA1B	1	0	1	0	0	NA	0.240141652503487	NA	NA	NA	3.46830714499597e-47	NA	NA	NA	0.455	NA	NA	0.0600354	GO:0006275	regulation of DNA replication	2/32	112/18866	0.0154267	0.163714	0.12281	ID3/S100A11	2
IFI16	1	0	1	0	0	NA	0.23915121592883	NA	NA	NA	9.89912571566603e-69	NA	NA	NA	0.303	NA	NA	0.0597878	GO:0060326	cell chemotaxis	3/32	311/18866	0.0154585	0.163714	0.12281	HSPB1/ANXA1/CALR	3
SOCS3	1	0	1	0	0	NA	0.237642133460974	NA	NA	NA	1.46281859171318e-67	NA	NA	NA	0.366	NA	NA	0.0594105	GO:0002664	regulation of T cell tolerance induction	1/32	10/18866	0.0168368	0.163714	0.12281	HLA-B	1
MYL12A	1	0	1	0	0	NA	0.237632802786924	NA	NA	NA	8.52350968754522e-54	NA	NA	NA	0.342	NA	NA	0.0594082	GO:0010986	positive regulation of lipoprotein particle clearance	1/32	10/18866	0.0168368	0.163714	0.12281	ANXA2	1
SERPING1	1	0	1	0	0	NA	0.235911795569821	NA	NA	NA	2.68311167708049e-42	NA	NA	NA	0.424	NA	NA	0.0589779	GO:0032377	regulation of intracellular lipid transport	1/32	10/18866	0.0168368	0.163714	0.12281	ANXA2	1
MIDN	1	0	1	0	0	NA	0.233896343090472	NA	NA	NA	2.48157520208834e-49	NA	NA	NA	0.342	NA	NA	0.0584741	GO:0032380	regulation of intracellular sterol transport	1/32	10/18866	0.0168368	0.163714	0.12281	ANXA2	1
CYBRD1	1	0	1	0	0	NA	0.232342341223737	NA	NA	NA	6.47650111383374e-65	NA	NA	NA	0.324	NA	NA	0.0580856	GO:0032383	regulation of intracellular cholesterol transport	1/32	10/18866	0.0168368	0.163714	0.12281	ANXA2	1
CHI3L2	1	0	0	0	1	NA	NA	NA	0.232281537696729	NA	NA	NA	1.72913400798413e-07	NA	NA	NA	0.377	0.0580704	GO:0034975	protein folding in endoplasmic reticulum	1/32	10/18866	0.0168368	0.163714	0.12281	CALR	1
TTYH1	1	0	1	0	0	NA	0.231992185104782	NA	NA	NA	6.07258031475032e-48	NA	NA	NA	0.884	NA	NA	0.057998	GO:0036500	ATF6-mediated unfolded protein response	1/32	10/18866	0.0168368	0.163714	0.12281	CALR	1
FADS1	1	0	1	0	0	NA	0.231761870561839	NA	NA	NA	1.05637214796373e-51	NA	NA	NA	0.39	NA	NA	0.0579405	GO:0045625	regulation of T-helper 1 cell differentiation	1/32	10/18866	0.0168368	0.163714	0.12281	ANXA1	1
TNFRSF6B	1	0	1	0	0	NA	0.230940883898889	NA	NA	NA	1.68026047499361e-37	NA	NA	NA	0.427	NA	NA	0.0577352	GO:0045647	negative regulation of erythrocyte differentiation	1/32	10/18866	0.0168368	0.163714	0.12281	ZFP36	1
S100A16	1	0	1	0	0	NA	0.230398962558301	NA	NA	NA	2.47945055985494e-56	NA	NA	NA	0.349	NA	NA	0.0575997	GO:1904338	regulation of dopaminergic neuron differentiation	1/32	10/18866	0.0168368	0.163714	0.12281	SFRP2	1
TSPO	1	0	1	0	0	NA	0.230309109780583	NA	NA	NA	1.61903440972024e-56	NA	NA	NA	0.385	NA	NA	0.0575773	GO:2000644	regulation of receptor catabolic process	1/32	10/18866	0.0168368	0.163714	0.12281	ANXA2	1
GTF3C6	1	0	1	0	0	NA	0.229881696064149	NA	NA	NA	5.93698792646342e-52	NA	NA	NA	0.393	NA	NA	0.0574704	GO:0033559	unsaturated fatty acid metabolic process	2/32	118/18866	0.0170241	0.163714	0.12281	FABP5/ANXA1	2
FPR1	1	0	1	0	0	NA	0.22908478609325	NA	NA	NA	6.53197478571725e-66	NA	NA	NA	0.283	NA	NA	0.0572712	GO:0000184	nuclear-transcribed mRNA catabolic process, nonsense-mediated decay	2/32	120/18866	0.0175717	0.163714	0.12281	RPL41/RPL36	2
S100A8	1	0	1	0	0	NA	0.228837698134211	NA	NA	NA	2.16347035498488e-41	NA	NA	NA	0.359	NA	NA	0.0572094	GO:0045047	protein targeting to ER	2/32	120/18866	0.0175717	0.163714	0.12281	RPL41/RPL36	2
CLIC1	1	0	1	0	0	NA	0.228462250277336	NA	NA	NA	1.21711793448439e-57	NA	NA	NA	0.306	NA	NA	0.0571156	GO:0006898	receptor-mediated endocytosis	3/32	328/18866	0.0177957	0.163714	0.12281	RAMP1/ANXA2/CALR	3
S1PR1	1	0	1	0	0	NA	0.226102463285747	NA	NA	NA	5.28516206847403e-51	NA	NA	NA	0.339	NA	NA	0.0565256	GO:0032612	interleukin-1 production	2/32	121/18866	0.0178483	0.163714	0.12281	HSPB1/ANXA1	2
PRDX1	1	0	1	0	0	NA	0.225569303883672	NA	NA	NA	2.31156683639846e-54	NA	NA	NA	0.953	NA	NA	0.0563923	GO:0006690	icosanoid metabolic process	2/32	122/18866	0.0181267	0.163714	0.12281	FABP5/ANXA1	2
SLC44A2	1	0	1	0	0	NA	0.225529888624783	NA	NA	NA	5.64271537458545e-45	NA	NA	NA	0.462	NA	NA	0.0563825	GO:0071214	cellular response to abiotic stimulus	3/32	331/18866	0.0182276	0.163714	0.12281	SFRP2/NSMF/RGR	3
SMAD9	1	0	1	0	0	NA	0.224927673107711	NA	NA	NA	3.73743760726003e-85	NA	NA	NA	0.246	NA	NA	0.0562319	GO:0104004	cellular response to environmental stimulus	3/32	331/18866	0.0182276	0.163714	0.12281	SFRP2/NSMF/RGR	3
ANGPTL4	1	0	1	0	0	NA	0.22466753665285	NA	NA	NA	3.5231574448144e-18	NA	NA	NA	0.6	NA	NA	0.0561669	GO:0009629	response to gravity	1/32	11/18866	0.0185053	0.163714	0.12281	FOS	1
ITM2A	1	0	1	0	0	NA	0.223533556054925	NA	NA	NA	1.15724495037866e-36	NA	NA	NA	0.317	NA	NA	0.0558834	GO:0032060	bleb assembly	1/32	11/18866	0.0185053	0.163714	0.12281	EMP3	1
HLA-DPA1	1	0	1	0	0	NA	0.219119004122335	NA	NA	NA	7.87167379927019e-54	NA	NA	NA	0.321	NA	NA	0.0547798	GO:0045628	regulation of T-helper 2 cell differentiation	1/32	11/18866	0.0185053	0.163714	0.12281	ANXA1	1
STAT3	1	0	1	0	0	NA	0.218758145085647	NA	NA	NA	5.47686638268967e-51	NA	NA	NA	0.321	NA	NA	0.0546895	GO:0098917	retrograde trans-synaptic signaling	1/32	11/18866	0.0185053	0.163714	0.12281	FABP5	1
RFX4	1	0	1	0	0	NA	0.218624780386205	NA	NA	NA	7.19745113915884e-59	NA	NA	NA	0.274	NA	NA	0.0546562	GO:0150104	transport across blood-brain barrier	1/32	11/18866	0.0185053	0.163714	0.12281	FABP5	1
NFE2L2	1	0	1	0	0	NA	0.216810500316749	NA	NA	NA	6.84769314804161e-51	NA	NA	NA	0.331	NA	NA	0.0542026	GO:1905383	protein localization to presynapse	1/32	11/18866	0.0185053	0.163714	0.12281	HSPB1	1
DDAH2	1	0	1	0	0	NA	0.215733450630497	NA	NA	NA	1.66758117802579e-62	NA	NA	NA	0.288	NA	NA	0.0539334	GO:1905902	regulation of mesoderm formation	1/32	11/18866	0.0185053	0.163714	0.12281	SFRP2	1
RNASET2	1	0	1	0	0	NA	0.214299446325428	NA	NA	NA	1.74959156629408e-47	NA	NA	NA	0.384	NA	NA	0.0535749	GO:2000035	regulation of stem cell division	1/32	11/18866	0.0185053	0.163714	0.12281	SFRP2	1
AIF1	1	0	1	0	0	NA	0.210498952329151	NA	NA	NA	1.00384700712488e-53	NA	NA	NA	0.318	NA	NA	0.0526247	GO:2000392	regulation of lamellipodium morphogenesis	1/32	11/18866	0.0185053	0.163714	0.12281	CD44	1
RHOQ	1	0	1	0	0	NA	0.209359377714885	NA	NA	NA	6.1791278559389e-39	NA	NA	NA	0.417	NA	NA	0.0523398	GO:0002698	negative regulation of immune effector process	2/32	124/18866	0.0186892	0.163714	0.12281	HLA-B/ANXA1	2
KCTD12	1	0	1	0	0	NA	0.208057375458754	NA	NA	NA	4.97833836917026e-37	NA	NA	NA	0.432	NA	NA	0.0520143	GO:0072599	establishment of protein localization to endoplasmic reticulum	2/32	124/18866	0.0186892	0.163714	0.12281	RPL41/RPL36	2
LAP3	1	0	1	0	0	NA	0.207755853799286	NA	NA	NA	2.52341182628713e-47	NA	NA	NA	0.36	NA	NA	0.051939	GO:0016050	vesicle organization	3/32	340/18866	0.0195586	0.163714	0.12281	ANXA1/ANXA2/CALR	3
MSX1	1	0	1	0	0	NA	0.207432997713126	NA	NA	NA	3.8478946024559e-71	NA	NA	NA	0.226	NA	NA	0.0518582	GO:0009101	glycoprotein biosynthetic process	3/32	342/18866	0.0198616	0.163714	0.12281	MAN1A2/RAMP1/OST4	3
C11orf96	1	0	1	0	0	NA	0.206476925066684	NA	NA	NA	1.54300538891325e-12	NA	NA	NA	0.475	NA	NA	0.0516192	GO:0001765	membrane raft assembly	1/32	12/18866	0.0201711	0.163714	0.12281	ANXA2	1
GRAMD2B	1	0	1	0	0	NA	0.204352862488445	NA	NA	NA	1.20656662317256e-46	NA	NA	NA	0.298	NA	NA	0.0510882	GO:0002517	T cell tolerance induction	1/32	12/18866	0.0201711	0.163714	0.12281	HLA-B	1
TCEA1	1	0	1	0	0	NA	0.204197264988963	NA	NA	NA	3.07801538316512e-40	NA	NA	NA	0.351	NA	NA	0.0510493	GO:0008298	intracellular mRNA localization	1/32	12/18866	0.0201711	0.163714	0.12281	ZFP36	1
SLCO2B1	1	0	1	0	0	NA	0.202211520091297	NA	NA	NA	1.03651439747493e-42	NA	NA	NA	0.32	NA	NA	0.0505529	GO:0010232	vascular transport	1/32	12/18866	0.0201711	0.163714	0.12281	FABP5	1
VAMP5	1	0	1	0	0	NA	0.201912038107945	NA	NA	NA	9.27421755429695e-44	NA	NA	NA	0.311	NA	NA	0.050478	GO:0010454	negative regulation of cell fate commitment	1/32	12/18866	0.0201711	0.163714	0.12281	SFRP2	1
ABHD17A	1	0	1	0	0	NA	0.201282188193552	NA	NA	NA	3.42554157477209e-23	NA	NA	NA	0.673	NA	NA	0.0503205	GO:0021819	layer formation in cerebral cortex	1/32	12/18866	0.0201711	0.163714	0.12281	RELN	1
MRVI1	1	0	1	0	0	NA	0.201090815393473	NA	NA	NA	2.45018942817582e-41	NA	NA	NA	0.371	NA	NA	0.0502727	GO:0044090	positive regulation of vacuole organization	1/32	12/18866	0.0201711	0.163714	0.12281	ANXA2	1
ALDOC	1	0	1	0	0	NA	0.200422858288114	NA	NA	NA	5.06842289053392e-60	NA	NA	NA	1	NA	NA	0.0501057	GO:0060213	positive regulation of nuclear-transcribed mRNA poly(A) tail shortening	1/32	12/18866	0.0201711	0.163714	0.12281	ZFP36	1
EMP1	1	0	1	0	0	NA	0.200073576030822	NA	NA	NA	9.49176970313404e-52	NA	NA	NA	0.316	NA	NA	0.0500184	GO:0071257	cellular response to electrical stimulus	1/32	12/18866	0.0201711	0.163714	0.12281	NSMF	1
ARHGAP5	1	0	1	0	0	NA	0.198249004360234	NA	NA	NA	3.96171946389007e-17	NA	NA	NA	0.592	NA	NA	0.0495623	GO:0071481	cellular response to X-ray	1/32	12/18866	0.0201711	0.163714	0.12281	SFRP2	1
GALNT15	1	0	1	0	0	NA	0.196014043116432	NA	NA	NA	2.4783810095304e-54	NA	NA	NA	0.271	NA	NA	0.0490035	GO:0045667	regulation of osteoblast differentiation	2/32	131/18866	0.0207153	0.163714	0.12281	ID3/SFRP2	2
FBLN1	1	0	1	0	0	NA	0.195174841299836	NA	NA	NA	8.44460024430025e-54	NA	NA	NA	0.27	NA	NA	0.0487937	GO:0007501	mesodermal cell fate specification	1/32	13/18866	0.0218341	0.163714	0.12281	SFRP2	1
FERMT2	1	0	1	0	0	NA	0.195021274313236	NA	NA	NA	7.67099150934386e-47	NA	NA	NA	0.312	NA	NA	0.0487553	GO:0032429	regulation of phospholipase A2 activity	1/32	13/18866	0.0218341	0.163714	0.12281	ANXA1	1
PDLIM4	1	0	1	0	0	NA	0.193647831613042	NA	NA	NA	7.21333263760471e-52	NA	NA	NA	0.27	NA	NA	0.048412	GO:0042921	glucocorticoid receptor signaling pathway	1/32	13/18866	0.0218341	0.163714	0.12281	CALR	1
SRI	1	0	1	0	0	NA	0.193437956604766	NA	NA	NA	8.05291416352913e-31	NA	NA	NA	0.794	NA	NA	0.0483595	GO:0051451	myoblast migration	1/32	13/18866	0.0218341	0.163714	0.12281	ANXA1	1
GNG7	1	0	1	0	0	NA	0.193092166100885	NA	NA	NA	3.36166476221304e-31	NA	NA	NA	0.44	NA	NA	0.048273	GO:0072578	neurotransmitter-gated ion channel clustering	1/32	13/18866	0.0218341	0.163714	0.12281	RELN	1
VWF	1	0	1	0	0	NA	0.192987584438454	NA	NA	NA	5.25341226364738e-11	NA	NA	NA	0.536	NA	NA	0.0482469	GO:0090179	planar cell polarity pathway involved in neural tube closure	1/32	13/18866	0.0218341	0.163714	0.12281	SFRP2	1
APCDD1	1	0	1	0	0	NA	0.192693468733199	NA	NA	NA	3.82008765258281e-43	NA	NA	NA	0.302	NA	NA	0.0481734	GO:0099640	axo-dendritic protein transport	1/32	13/18866	0.0218341	0.163714	0.12281	HSPB1	1
EFCAB14	1	0	1	0	0	NA	0.19218927356968	NA	NA	NA	7.00110311286007e-34	NA	NA	NA	0.362	NA	NA	0.0480473	GO:2001198	regulation of dendritic cell differentiation	1/32	13/18866	0.0218341	0.163714	0.12281	HLA-B	1
KAT2B	1	0	1	0	0	NA	0.191679018594579	NA	NA	NA	5.05825611895976e-40	NA	NA	NA	0.323	NA	NA	0.0479198	GO:0062197	cellular response to chemical stress	3/32	360/18866	0.0227061	0.163714	0.12281	FOS/HSPB1/ANXA1	3
SERPINA3	1	0	1	0	0	NA	0.19121490373396	NA	NA	NA	1.96361227031047e-15	NA	NA	NA	0.731	NA	NA	0.0478037	GO:0001921	positive regulation of receptor recycling	1/32	14/18866	0.0234944	0.163714	0.12281	ANXA2	1
LMO2	1	0	1	0	0	NA	0.190469524892916	NA	NA	NA	2.67156252621022e-48	NA	NA	NA	0.276	NA	NA	0.0476174	GO:0002829	negative regulation of type 2 immune response	1/32	14/18866	0.0234944	0.163714	0.12281	ANXA1	1
APOC2	1	0	1	0	0	NA	0.189706532060101	NA	NA	NA	2.14098079284055e-49	NA	NA	NA	0.276	NA	NA	0.0474266	GO:0003214	cardiac left ventricle morphogenesis	1/32	14/18866	0.0234944	0.163714	0.12281	SFRP2	1
PLSCR4	1	0	1	0	0	NA	0.188716291145139	NA	NA	NA	4.23235795307028e-38	NA	NA	NA	0.282	NA	NA	0.0471791	GO:0031958	corticosteroid receptor signaling pathway	1/32	14/18866	0.0234944	0.163714	0.12281	CALR	1
B3GAT2	1	0	1	0	0	NA	0.188477251963639	NA	NA	NA	9.67901570468699e-55	NA	NA	NA	0.261	NA	NA	0.0471193	GO:0032802	low-density lipoprotein particle receptor catabolic process	1/32	14/18866	0.0234944	0.163714	0.12281	ANXA2	1
PLAAT4	1	0	1	0	0	NA	0.188392108868453	NA	NA	NA	2.05699044788286e-47	NA	NA	NA	0.291	NA	NA	0.047098	GO:0035358	regulation of peroxisome proliferator activated receptor signaling pathway	1/32	14/18866	0.0234944	0.163714	0.12281	FABP5	1
HLA-DPB1	1	0	1	0	0	NA	0.188209220563988	NA	NA	NA	8.6067492754992e-58	NA	NA	NA	0.285	NA	NA	0.0470523	GO:0042659	regulation of cell fate specification	1/32	14/18866	0.0234944	0.163714	0.12281	SFRP2	1
ELOVL5	1	0	1	0	0	NA	0.186337647839989	NA	NA	NA	1.12438220618078e-33	NA	NA	NA	0.343	NA	NA	0.0465844	GO:0043650	dicarboxylic acid biosynthetic process	1/32	14/18866	0.0234944	0.163714	0.12281	GLUD1	1
SMOX	1	0	1	0	0	NA	0.186141911794572	NA	NA	NA	3.24349146834959e-52	NA	NA	NA	0.294	NA	NA	0.0465355	GO:0060211	regulation of nuclear-transcribed mRNA poly(A) tail shortening	1/32	14/18866	0.0234944	0.163714	0.12281	ZFP36	1
PDLIM5	1	0	1	0	0	NA	0.184612165572633	NA	NA	NA	6.8214372382683e-42	NA	NA	NA	0.282	NA	NA	0.046153	GO:0070486	leukocyte aggregation	1/32	14/18866	0.0234944	0.163714	0.12281	CD44	1
HMGN1	1	0	1	0	0	NA	0.184190847049351	NA	NA	NA	6.21655443872537e-34	NA	NA	NA	0.382	NA	NA	0.0460477	GO:0071285	cellular response to lithium ion	1/32	14/18866	0.0234944	0.163714	0.12281	CALR	1
ANXA5	1	0	1	0	0	NA	0.183917648102181	NA	NA	NA	3.13299052645967e-40	NA	NA	NA	0.32	NA	NA	0.0459794	GO:0072350	tricarboxylic acid metabolic process	1/32	14/18866	0.0234944	0.163714	0.12281	GLUD1	1
SPON1	1	0	1	0	0	NA	0.183456608981547	NA	NA	NA	2.84976006515891e-41	NA	NA	NA	0.272	NA	NA	0.0458642	GO:0090128	regulation of synapse maturation	1/32	14/18866	0.0234944	0.163714	0.12281	RELN	1
BDH2	1	0	1	0	0	NA	0.183404223802526	NA	NA	NA	7.26939852933909e-42	NA	NA	NA	0.304	NA	NA	0.0458511	GO:0090178	regulation of establishment of planar polarity involved in neural tube closure	1/32	14/18866	0.0234944	0.163714	0.12281	SFRP2	1
FCER1G	1	0	1	0	0	NA	0.182642690080596	NA	NA	NA	1.36022569623336e-38	NA	NA	NA	0.3	NA	NA	0.0456607	GO:0110154	RNA decapping	1/32	14/18866	0.0234944	0.163714	0.12281	ZFP36	1
EMX2OS	1	0	1	0	0	NA	0.181279772077379	NA	NA	NA	6.53834054916687e-38	NA	NA	NA	0.297	NA	NA	0.0453199	GO:0110156	methylguanosine-cap decapping	1/32	14/18866	0.0234944	0.163714	0.12281	ZFP36	1
PRCP	1	0	1	0	0	NA	0.181161780137313	NA	NA	NA	8.85635586874688e-33	NA	NA	NA	0.34	NA	NA	0.0452904	GO:0010631	epithelial cell migration	3/32	365/18866	0.0235339	0.163714	0.12281	HSPB1/ANXA1/CALR	3
SLCO4A1	1	0	1	0	0	NA	0.180502452761883	NA	NA	NA	2.71503652337949e-31	NA	NA	NA	0.346	NA	NA	0.0451256	GO:0032355	response to estradiol	2/32	141/18866	0.0237617	0.163714	0.12281	ANXA1/CALR	2
NCAN	1	0	1	0	0	NA	0.179747208320805	NA	NA	NA	5.61191696327513e-14	NA	NA	NA	0.511	NA	NA	0.0449368	GO:0046394	carboxylic acid biosynthetic process	3/32	367/18866	0.0238696	0.163714	0.12281	FABP5/GLUD1/ANXA1	3
BCL6	1	0	1	0	0	NA	0.1790148857781	NA	NA	NA	4.63624825396881e-35	NA	NA	NA	0.353	NA	NA	0.0447537	GO:0016053	organic acid biosynthetic process	3/32	368/18866	0.0240385	0.163714	0.12281	FABP5/GLUD1/ANXA1	3
GNG11	1	0	1	0	0	NA	0.178931757766708	NA	NA	NA	3.10035867801196e-34	NA	NA	NA	0.284	NA	NA	0.0447329	GO:0090132	epithelium migration	3/32	368/18866	0.0240385	0.163714	0.12281	HSPB1/ANXA1/CALR	3
FAM189A2	1	0	1	0	0	NA	0.177282443285213	NA	NA	NA	2.32784584686938e-42	NA	NA	NA	0.283	NA	NA	0.0443206	GO:0045861	negative regulation of proteolysis	3/32	369/18866	0.024208	0.163714	0.12281	CD44/SFRP2/ANXA2	3
ENG	1	0	1	0	0	NA	0.176723270900027	NA	NA	NA	3.30538325564231e-31	NA	NA	NA	0.288	NA	NA	0.0441808	GO:0045598	regulation of fat cell differentiation	2/32	143/18866	0.0243919	0.163714	0.12281	SFRP2/ZFP36	2
CRYL1	1	0	1	0	0	NA	0.176105218062063	NA	NA	NA	2.17252572429001e-32	NA	NA	NA	0.336	NA	NA	0.0440263	GO:0010212	response to ionizing radiation	2/32	144/18866	0.0247096	0.163714	0.12281	SFRP2/ANXA1	2
ADCYAP1R1	1	0	1	0	0	NA	0.17588856925285	NA	NA	NA	4.63489018373263e-13	NA	NA	NA	0.582	NA	NA	0.0439721	GO:0050921	positive regulation of chemotaxis	2/32	144/18866	0.0247096	0.163714	0.12281	HSPB1/CALR	2
ACSS1	1	0	1	0	0	NA	0.175882439430456	NA	NA	NA	1.47430046951259e-40	NA	NA	NA	0.292	NA	NA	0.0439706	GO:0007612	learning	2/32	145/18866	0.0250289	0.163714	0.12281	RELN/FOS	2
RDX	1	0	1	0	0	NA	0.175710152133572	NA	NA	NA	1.53260158389782e-40	NA	NA	NA	0.366	NA	NA	0.0439275	GO:0033135	regulation of peptidyl-serine phosphorylation	2/32	145/18866	0.0250289	0.163714	0.12281	CD44/SFRP2	2
FAM89A	1	0	1	0	0	NA	0.175179858693666	NA	NA	NA	2.23856222845864e-52	NA	NA	NA	0.234	NA	NA	0.043795	GO:0018108	peptidyl-tyrosine phosphorylation	3/32	374/18866	0.0250654	0.163714	0.12281	RELN/CD44/SFRP2	3
PPP1R14B	1	0	1	0	0	NA	0.174689797454168	NA	NA	NA	1.54532578395482e-39	NA	NA	NA	0.346	NA	NA	0.0436724	GO:0090130	tissue migration	3/32	374/18866	0.0250654	0.163714	0.12281	HSPB1/ANXA1/CALR	3
SELENBP1	1	0	1	0	0	NA	0.174081261437188	NA	NA	NA	1.14404394322546e-32	NA	NA	NA	0.297	NA	NA	0.0435203	GO:0018298	protein-chromophore linkage	1/32	15/18866	0.0251519	0.163714	0.12281	RGR	1
NFKBIA	1	0	1	0	0	NA	0.173995341723286	NA	NA	NA	3.61556026185273e-27	NA	NA	NA	0.354	NA	NA	0.0434988	GO:0036376	sodium ion export across plasma membrane	1/32	15/18866	0.0251519	0.163714	0.12281	FXYD1	1
SERPINB6	1	0	1	0	0	NA	0.173890487591641	NA	NA	NA	3.32339210860811e-37	NA	NA	NA	0.354	NA	NA	0.0434726	GO:0043518	negative regulation of DNA damage response, signal transduction by p53 class mediator	1/32	15/18866	0.0251519	0.163714	0.12281	CD44	1
PLSCR1	1	0	1	0	0	NA	0.173466305351187	NA	NA	NA	5.91228826409572e-41	NA	NA	NA	0.276	NA	NA	0.0433666	GO:0045064	T-helper 2 cell differentiation	1/32	15/18866	0.0251519	0.163714	0.12281	ANXA1	1
SHISA6	1	0	1	0	0	NA	0.173340043618886	NA	NA	NA	9.08350705595469e-52	NA	NA	NA	0.229	NA	NA	0.043335	GO:0060026	convergent extension	1/32	15/18866	0.0251519	0.163714	0.12281	SFRP2	1
ACAA2	1	0	1	0	0	NA	0.172890647912804	NA	NA	NA	4.7113903129264e-38	NA	NA	NA	0.293	NA	NA	0.0432227	GO:0060049	regulation of protein glycosylation	1/32	15/18866	0.0251519	0.163714	0.12281	RAMP1	1
SIGIRR	1	0	1	0	0	NA	0.172338450091038	NA	NA	NA	1.71609872853816e-35	NA	NA	NA	0.303	NA	NA	0.0430846	GO:0070365	hepatocyte differentiation	1/32	15/18866	0.0251519	0.163714	0.12281	ANXA1	1
MOB1A	1	0	1	0	0	NA	0.172212110020079	NA	NA	NA	3.75276474354667e-40	NA	NA	NA	0.285	NA	NA	0.043053	GO:0090177	establishment of planar polarity involved in neural tube closure	1/32	15/18866	0.0251519	0.163714	0.12281	SFRP2	1
ENTPD2	1	0	1	0	0	NA	0.171814349143367	NA	NA	NA	1.91758643767756e-57	NA	NA	NA	0.212	NA	NA	0.0429536	GO:2000095	regulation of Wnt signaling pathway, planar cell polarity pathway	1/32	15/18866	0.0251519	0.163714	0.12281	SFRP2	1
IL6ST	1	0	1	0	0	NA	0.171709205885582	NA	NA	NA	1.91191691235609e-16	NA	NA	NA	0.657	NA	NA	0.0429273	GO:2001028	positive regulation of endothelial cell chemotaxis	1/32	15/18866	0.0251519	0.163714	0.12281	HSPB1	1
PDIA3	1	0	1	0	0	NA	0.171129812608804	NA	NA	NA	3.63171256177763e-22	NA	NA	NA	0.445	NA	NA	0.0427825	GO:0044344	cellular response to fibroblast growth factor stimulus	2/32	146/18866	0.02535	0.163714	0.12281	CD44/ZFP36	2
GMPR	1	0	1	0	0	NA	0.170516570634119	NA	NA	NA	2.25911907966277e-41	NA	NA	NA	0.222	NA	NA	0.0426291	GO:0048813	dendrite morphogenesis	2/32	146/18866	0.02535	0.163714	0.12281	RELN/NSMF	2
TYROBP	1	0	1	0	0	NA	0.170432513082666	NA	NA	NA	3.43548289646821e-41	NA	NA	NA	0.285	NA	NA	0.0426081	GO:0018212	peptidyl-tyrosine modification	3/32	377/18866	0.0255877	0.163714	0.12281	RELN/CD44/SFRP2	3
FCGRT	1	0	1	0	0	NA	0.170395492900218	NA	NA	NA	1.63974684859666e-40	NA	NA	NA	0.286	NA	NA	0.0425989	GO:1904064	positive regulation of cation transmembrane transport	2/32	147/18866	0.0256728	0.163714	0.12281	RELN/FXYD1	2
COPS9	1	0	1	0	0	NA	0.169742680522128	NA	NA	NA	1.05746018640972e-35	NA	NA	NA	0.986	NA	NA	0.0424357	GO:0031644	regulation of nervous system process	2/32	148/18866	0.0259973	0.163714	0.12281	RELN/FABP5	2
FIBIN	1	0	1	0	0	NA	0.169143436701785	NA	NA	NA	2.30514895308454e-39	NA	NA	NA	0.236	NA	NA	0.0422859	GO:0071901	negative regulation of protein serine/threonine kinase activity	2/32	148/18866	0.0259973	0.163714	0.12281	SFRP2/HSPB1	2
ASCL1	1	0	1	0	0	NA	0.169010253556173	NA	NA	NA	1.26478947703559e-45	NA	NA	NA	0.215	NA	NA	0.0422526	GO:0001780	neutrophil homeostasis	1/32	16/18866	0.0268068	0.163714	0.12281	ANXA1	1
DCLK2	1	0	1	0	0	NA	0.168935409974257	NA	NA	NA	5.69899834771349e-25	NA	NA	NA	0.37	NA	NA	0.0422339	GO:0030214	hyaluronan catabolic process	1/32	16/18866	0.0268068	0.163714	0.12281	CD44	1
TNS3	1	0	1	0	0	NA	0.168520508483897	NA	NA	NA	2.80869683844886e-34	NA	NA	NA	0.273	NA	NA	0.0421301	GO:0034116	positive regulation of heterotypic cell-cell adhesion	1/32	16/18866	0.0268068	0.163714	0.12281	CD44	1
MSN	1	0	1	0	0	NA	0.16851358382762	NA	NA	NA	2.87691513879743e-40	NA	NA	NA	0.289	NA	NA	0.0421284	GO:0043508	negative regulation of JUN kinase activity	1/32	16/18866	0.0268068	0.163714	0.12281	SFRP2	1
SNX5	1	0	1	0	0	NA	0.168198143673336	NA	NA	NA	2.45806536814403e-30	NA	NA	NA	0.332	NA	NA	0.0420495	GO:0045953	negative regulation of natural killer cell mediated cytotoxicity	1/32	16/18866	0.0268068	0.163714	0.12281	HLA-B	1
ITM2C	1	0	1	0	0	NA	0.167352461761289	NA	NA	NA	1.72873532743164e-41	NA	NA	NA	0.996	NA	NA	0.0418381	GO:0061450	trophoblast cell migration	1/32	16/18866	0.0268068	0.163714	0.12281	CALR	1
AMFR	1	0	1	0	0	NA	0.165959273956045	NA	NA	NA	1.94728711143031e-22	NA	NA	NA	0.386	NA	NA	0.0414898	GO:1900451	positive regulation of glutamate receptor signaling pathway	1/32	16/18866	0.0268068	0.163714	0.12281	RELN	1
NDUFA4L2	1	0	1	0	0	NA	0.165902722248745	NA	NA	NA	1.49516075636261e-30	NA	NA	NA	0.284	NA	NA	0.0414757	GO:1901163	regulation of trophoblast cell migration	1/32	16/18866	0.0268068	0.163714	0.12281	CALR	1
ENAH	1	0	1	0	0	NA	0.16571024857346	NA	NA	NA	2.61206427983824e-34	NA	NA	NA	0.349	NA	NA	0.0414276	GO:1902166	negative regulation of intrinsic apoptotic signaling pathway in response to DNA damage by p53 class mediator	1/32	16/18866	0.0268068	0.163714	0.12281	CD44	1
CD151	1	0	1	0	0	NA	0.164492878290423	NA	NA	NA	2.83191624380329e-31	NA	NA	NA	0.33	NA	NA	0.0411232	GO:0061041	regulation of wound healing	2/32	151/18866	0.0269808	0.163714	0.12281	ANXA1/ANXA2	2
LAMB2	1	0	1	0	0	NA	0.163989645349669	NA	NA	NA	2.67347156061821e-35	NA	NA	NA	0.27	NA	NA	0.0409974	GO:0070972	protein localization to endoplasmic reticulum	2/32	152/18866	0.027312	0.163714	0.12281	RPL41/RPL36	2
SNRPG	1	0	1	0	0	NA	0.16365124391978	NA	NA	NA	1.16960415228836e-23	NA	NA	NA	0.372	NA	NA	0.0409128	GO:0002822	regulation of adaptive immune response based on somatic recombination of immune receptors built from immunoglobulin superfamily domains	2/32	153/18866	0.0276448	0.163714	0.12281	HLA-B/ANXA1	2
PAX6	1	0	1	0	0	NA	0.162156907914886	NA	NA	NA	5.4187234702796e-44	NA	NA	NA	0.222	NA	NA	0.0405392	GO:0071774	response to fibroblast growth factor	2/32	153/18866	0.0276448	0.163714	0.12281	CD44/ZFP36	2
LIMK2	1	0	1	0	0	NA	0.16215243823163	NA	NA	NA	6.50857453243909e-35	NA	NA	NA	0.275	NA	NA	0.0405381	GO:0002262	myeloid cell homeostasis	2/32	154/18866	0.0279793	0.163714	0.12281	ZFP36/ANXA1	2
TGM2	1	0	1	0	0	NA	0.160817627147318	NA	NA	NA	2.50305648558009e-28	NA	NA	NA	0.267	NA	NA	0.0402044	GO:0050773	regulation of dendrite development	2/32	155/18866	0.0283154	0.163714	0.12281	RELN/NSMF	2
ATRAID	1	0	1	0	0	NA	0.158871038163655	NA	NA	NA	2.02180782292629e-27	NA	NA	NA	0.272	NA	NA	0.0397178	GO:0002483	antigen processing and presentation of endogenous peptide antigen	1/32	17/18866	0.0284589	0.163714	0.12281	HLA-B	1
POLR2J	1	0	1	0	0	NA	0.15694364742338	NA	NA	NA	6.48148363723703e-20	NA	NA	NA	0.413	NA	NA	0.0392359	GO:0002643	regulation of tolerance induction	1/32	17/18866	0.0284589	0.163714	0.12281	HLA-B	1
LRP10	1	0	1	0	0	NA	0.156894691992714	NA	NA	NA	5.67277214871165e-39	NA	NA	NA	0.276	NA	NA	0.0392237	GO:0002716	negative regulation of natural killer cell mediated immunity	1/32	17/18866	0.0284589	0.163714	0.12281	HLA-B	1
DAG1	1	0	1	0	0	NA	0.156115137303239	NA	NA	NA	5.31021685059369e-25	NA	NA	NA	0.325	NA	NA	0.0390288	GO:0009084	glutamine family amino acid biosynthetic process	1/32	17/18866	0.0284589	0.163714	0.12281	GLUD1	1
PECAM1	1	0	1	0	0	NA	0.155573831356022	NA	NA	NA	2.55661397853344e-28	NA	NA	NA	0.276	NA	NA	0.0388935	GO:0016045	detection of bacterium	1/32	17/18866	0.0284589	0.163714	0.12281	HLA-B	1
EMID1	1	0	1	0	0	NA	0.15530606849725	NA	NA	NA	1.8624004498691e-35	NA	NA	NA	0.239	NA	NA	0.0388265	GO:0019885	antigen processing and presentation of endogenous peptide antigen via MHC class I	1/32	17/18866	0.0284589	0.163714	0.12281	HLA-B	1
PLIN1	1	0	1	0	0	NA	0.154089478912285	NA	NA	NA	1.11751204300146e-45	NA	NA	NA	0.167	NA	NA	0.0385224	GO:0042249	establishment of planar polarity of embryonic epithelium	1/32	17/18866	0.0284589	0.163714	0.12281	SFRP2	1
MARCKS	1	0	1	0	0	NA	0.153978518339358	NA	NA	NA	8.62140495001313e-21	NA	NA	NA	0.771	NA	NA	0.0384946	GO:0043649	dicarboxylic acid catabolic process	1/32	17/18866	0.0284589	0.163714	0.12281	GLUD1	1
VASN	1	0	1	0	0	NA	0.153636484865605	NA	NA	NA	8.79970402629736e-30	NA	NA	NA	0.248	NA	NA	0.0384091	GO:0045623	negative regulation of T-helper cell differentiation	1/32	17/18866	0.0284589	0.163714	0.12281	ANXA1	1
IFITM1	1	0	1	0	0	NA	0.152383145211448	NA	NA	NA	2.95167107688636e-34	NA	NA	NA	0.226	NA	NA	0.0380958	GO:0048385	regulation of retinoic acid receptor signaling pathway	1/32	17/18866	0.0284589	0.163714	0.12281	CALR	1
LRRC8A	1	0	1	0	0	NA	0.152370348605807	NA	NA	NA	9.8319794807459e-08	NA	NA	NA	0.595	NA	NA	0.0380926	GO:0061158	3'-UTR-mediated mRNA destabilization	1/32	17/18866	0.0284589	0.163714	0.12281	ZFP36	1
HIF1A	1	0	1	0	0	NA	0.151693474107876	NA	NA	NA	1.21709340239288e-20	NA	NA	NA	0.426	NA	NA	0.0379234	GO:0072673	lamellipodium morphogenesis	1/32	17/18866	0.0284589	0.163714	0.12281	CD44	1
BMPR1B	1	0	1	0	0	NA	0.151493597609846	NA	NA	NA	1.25562734581538e-33	NA	NA	NA	0.245	NA	NA	0.0378734	GO:1904948	midbrain dopaminergic neuron differentiation	1/32	17/18866	0.0284589	0.163714	0.12281	SFRP2	1
PLCD3	1	0	1	0	0	NA	0.151448723176271	NA	NA	NA	1.49067295042732e-31	NA	NA	NA	0.267	NA	NA	0.0378622	GO:0006869	lipid transport	3/32	393/18866	0.0284731	0.163714	0.12281	FABP5/ANXA1/ANXA2	3
YAP1	1	0	1	0	0	NA	0.151028584772341	NA	NA	NA	1.03306468985339e-34	NA	NA	NA	0.226	NA	NA	0.0377571	GO:0030198	extracellular matrix organization	3/32	395/18866	0.0288455	0.163714	0.12281	CD44/SFRP2/ANXA2	3
TIMM8B	1	0	1	0	0	NA	0.150848644875144	NA	NA	NA	1.64524454746115e-23	NA	NA	NA	0.315	NA	NA	0.0377122	GO:0010770	positive regulation of cell morphogenesis involved in differentiation	2/32	157/18866	0.0289926	0.163714	0.12281	RELN/CALR	2
MT1A	1	0	1	0	0	NA	0.150592949500664	NA	NA	NA	6.77533112039304e-29	NA	NA	NA	0.249	NA	NA	0.0376482	GO:0043062	extracellular structure organization	3/32	396/18866	0.0290328	0.163714	0.12281	CD44/SFRP2/ANXA2	3
ADGRA3	1	0	1	0	0	NA	0.15050325316107	NA	NA	NA	3.84371467085171e-34	NA	NA	NA	0.239	NA	NA	0.0376258	GO:1903707	negative regulation of hemopoiesis	2/32	158/18866	0.0293336	0.163714	0.12281	ZFP36/ANXA1	2
HNRNPF	1	0	1	0	0	NA	0.150399678009126	NA	NA	NA	2.0570921144156e-28	NA	NA	NA	0.315	NA	NA	0.0375999	GO:0050777	negative regulation of immune response	2/32	159/18866	0.0296763	0.163714	0.12281	HLA-B/ANXA1	2
ITPR2	1	0	1	0	0	NA	0.150041405080756	NA	NA	NA	2.17471638815405e-34	NA	NA	NA	0.229	NA	NA	0.0375104	GO:1902107	positive regulation of leukocyte differentiation	2/32	159/18866	0.0296763	0.163714	0.12281	FOS/ANXA1	2
RARRES2	1	0	1	0	0	NA	0.149551073061416	NA	NA	NA	1.11982994333095e-31	NA	NA	NA	0.259	NA	NA	0.0373878	GO:0001710	mesodermal cell fate commitment	1/32	18/18866	0.0301083	0.163714	0.12281	SFRP2	1
CHPT1	1	0	1	0	0	NA	0.1491112251491	NA	NA	NA	2.60412014040688e-21	NA	NA	NA	0.397	NA	NA	0.0372778	GO:0006491	N-glycan processing	1/32	18/18866	0.0301083	0.163714	0.12281	MAN1A2	1
FN1	1	0	1	0	0	NA	0.148977454832534	NA	NA	NA	8.05155497403248e-25	NA	NA	NA	0.253	NA	NA	0.0372444	GO:0032780	negative regulation of ATPase activity	1/32	18/18866	0.0301083	0.163714	0.12281	CNN3	1
TMEM256	1	0	1	0	0	NA	0.148921584357119	NA	NA	NA	1.51199858399175e-18	NA	NA	NA	0.334	NA	NA	0.0372304	GO:0035994	response to muscle stretch	1/32	18/18866	0.0301083	0.163714	0.12281	FOS	1
GNG12	1	0	1	0	0	NA	0.148833904546622	NA	NA	NA	1.25780391495017e-34	NA	NA	NA	0.221	NA	NA	0.0372085	GO:0036035	osteoclast development	1/32	18/18866	0.0301083	0.163714	0.12281	ANXA2	1
SSPN	1	0	1	0	0	NA	0.148720082693221	NA	NA	NA	6.86813881040961e-43	NA	NA	NA	0.199	NA	NA	0.03718	GO:0060192	negative regulation of lipase activity	1/32	18/18866	0.0301083	0.163714	0.12281	ANXA1	1
TYMP	1	0	1	0	0	NA	0.148577491187533	NA	NA	NA	1.35970318960112e-29	NA	NA	NA	0.246	NA	NA	0.0371444	GO:0071371	cellular response to gonadotropin stimulus	1/32	18/18866	0.0301083	0.163714	0.12281	NSMF	1
GPR137B	1	0	1	0	0	NA	0.148485192356566	NA	NA	NA	1.14728393046022e-31	NA	NA	NA	0.256	NA	NA	0.0371213	GO:1900153	positive regulation of nuclear-transcribed mRNA catabolic process, deadenylation-dependent decay	1/32	18/18866	0.0301083	0.163714	0.12281	ZFP36	1
VSIG4	1	0	1	0	0	NA	0.148411092502019	NA	NA	NA	3.6231764517464e-30	NA	NA	NA	0.252	NA	NA	0.0371028	GO:1902165	regulation of intrinsic apoptotic signaling pathway in response to DNA damage by p53 class mediator	1/32	18/18866	0.0301083	0.163714	0.12281	CD44	1
WASF2	1	0	1	0	0	NA	0.14832201796041	NA	NA	NA	2.98011446663337e-26	NA	NA	NA	0.296	NA	NA	0.0370805	GO:1905276	regulation of epithelial tube formation	1/32	18/18866	0.0301083	0.163714	0.12281	SFRP2	1
HYAL2	1	0	1	0	0	NA	0.148109794237683	NA	NA	NA	4.27690932891223e-26	NA	NA	NA	0.212	NA	NA	0.0370274	GO:0045765	regulation of angiogenesis	3/32	403/18866	0.0303616	0.163753	0.122839	SFRP2/HSPB1/ANXA1	3
ZSCAN16-AS1	1	0	1	0	0	NA	0.147983150063763	NA	NA	NA	1.05601328389502e-20	NA	NA	NA	0.349	NA	NA	0.0369958	GO:0034767	positive regulation of ion transmembrane transport	2/32	161/18866	0.0303665	0.163753	0.122839	RELN/FXYD1	2
TM4SF1	1	0	1	0	0	NA	0.147655645107158	NA	NA	NA	2.97196340719795e-24	NA	NA	NA	0.283	NA	NA	0.0369139	GO:0007517	muscle organ development	3/32	407/18866	0.0311354	0.166324	0.124768	ID3/FOS/TAGLN	3
PALM	1	0	1	0	0	NA	0.147548668255689	NA	NA	NA	1.00940697956882e-18	NA	NA	NA	0.739	NA	NA	0.0368872	GO:0001764	neuron migration	2/32	164/18866	0.0314137	0.166324	0.124768	RELN/NSMF	2
POU3F3	1	0	1	0	0	NA	0.147463837318164	NA	NA	NA	7.56632830593522e-25	NA	NA	NA	0.292	NA	NA	0.036866	GO:0043535	regulation of blood vessel endothelial cell migration	2/32	164/18866	0.0314137	0.166324	0.124768	HSPB1/ANXA1	2
SAMHD1	1	0	1	0	0	NA	0.147429183801349	NA	NA	NA	2.49429248859893e-33	NA	NA	NA	0.287	NA	NA	0.0368573	GO:0036342	post-anal tail morphogenesis	1/32	19/18866	0.0317549	0.166324	0.124768	SFRP2	1
FADS2	1	0	1	0	0	NA	0.147154689635855	NA	NA	NA	3.55870259521482e-15	NA	NA	NA	0.507	NA	NA	0.0367887	GO:0045063	T-helper 1 cell differentiation	1/32	19/18866	0.0317549	0.166324	0.124768	ANXA1	1
TMBIM4	1	0	1	0	0	NA	0.146611928556484	NA	NA	NA	1.78653597294702e-27	NA	NA	NA	0.282	NA	NA	0.036653	GO:0098543	detection of other organism	1/32	19/18866	0.0317549	0.166324	0.124768	HLA-B	1
RPL31	1	0	1	0	0	NA	0.146537525125684	NA	NA	NA	1.89817089335626e-36	NA	NA	NA	1	NA	NA	0.0366344	GO:1902176	negative regulation of oxidative stress-induced intrinsic apoptotic signaling pathway	1/32	19/18866	0.0317549	0.166324	0.124768	HSPB1	1
COPE	1	1	0	0	0	0.146520348337944	NA	NA	NA	0.00660006187544356	NA	NA	NA	0.868	NA	NA	NA	0.0366301	GO:2001233	regulation of apoptotic signaling pathway	3/32	413/18866	0.0323156	0.166324	0.124768	CD44/SFRP2/HSPB1	3
SEMA4B	1	0	1	0	0	NA	0.145933297209766	NA	NA	NA	1.82176421233849e-24	NA	NA	NA	0.279	NA	NA	0.0364833	GO:0009100	glycoprotein metabolic process	3/32	415/18866	0.0327142	0.166324	0.124768	MAN1A2/RAMP1/OST4	3
FSTL1	1	0	1	0	0	NA	0.145909967764672	NA	NA	NA	4.98581902141988e-31	NA	NA	NA	0.27	NA	NA	0.0364775	GO:0002819	regulation of adaptive immune response	2/32	168/18866	0.0328322	0.166324	0.124768	HLA-B/ANXA1	2
BMP7	1	0	1	0	0	NA	0.145866265583436	NA	NA	NA	7.67793953483457e-37	NA	NA	NA	0.23	NA	NA	0.0364666	GO:0001911	negative regulation of leukocyte mediated cytotoxicity	1/32	20/18866	0.0333989	0.166324	0.124768	HLA-B	1
NINJ1	1	0	1	0	0	NA	0.145719067401948	NA	NA	NA	7.77654557105577e-26	NA	NA	NA	0.315	NA	NA	0.0364298	GO:0002827	positive regulation of T-helper 1 type immune response	1/32	20/18866	0.0333989	0.166324	0.124768	ANXA1	1
ACSL1	1	0	1	0	0	NA	0.145717633323378	NA	NA	NA	1.07831272265889e-27	NA	NA	NA	0.282	NA	NA	0.0364294	GO:0010988	regulation of low-density lipoprotein particle clearance	1/32	20/18866	0.0333989	0.166324	0.124768	ANXA2	1
MBD3	1	0	1	0	0	NA	0.145625044049332	NA	NA	NA	4.00560681108334e-23	NA	NA	NA	0.342	NA	NA	0.0364063	GO:0030903	notochord development	1/32	20/18866	0.0333989	0.166324	0.124768	ID3	1
SYNGR2	1	0	1	0	0	NA	0.145519032272838	NA	NA	NA	7.27667126991402e-32	NA	NA	NA	0.28	NA	NA	0.0363798	GO:0032793	positive regulation of CREB transcription factor activity	1/32	20/18866	0.0333989	0.166324	0.124768	RELN	1
ALKBH7	1	0	1	0	0	NA	0.144639002423804	NA	NA	NA	1.72643514742661e-23	NA	NA	NA	0.396	NA	NA	0.0361598	GO:0051412	response to corticosterone	1/32	20/18866	0.0333989	0.166324	0.124768	FOS	1
PAICS	1	0	1	0	0	NA	0.144079915173233	NA	NA	NA	2.3820650485752e-24	NA	NA	NA	0.333	NA	NA	0.03602	GO:1900151	regulation of nuclear-transcribed mRNA catabolic process, deadenylation-dependent decay	1/32	20/18866	0.0333989	0.166324	0.124768	ZFP36	1
HDGF	1	0	1	0	0	NA	0.14267780362501	NA	NA	NA	2.63051135193004e-22	NA	NA	NA	0.363	NA	NA	0.0356695	GO:0034614	cellular response to reactive oxygen species	2/32	170/18866	0.0335508	0.166324	0.124768	FOS/ANXA1	2
AXL	1	0	1	0	0	NA	0.142586269888284	NA	NA	NA	9.16526776956967e-28	NA	NA	NA	0.264	NA	NA	0.0356466	GO:0006633	fatty acid biosynthetic process	2/32	173/18866	0.0346404	0.166324	0.124768	FABP5/ANXA1	2
PGM1	1	0	1	0	0	NA	0.142283025167473	NA	NA	NA	4.13579573968878e-21	NA	NA	NA	0.305	NA	NA	0.0355708	GO:0010469	regulation of signaling receptor activity	2/32	174/18866	0.0350066	0.166324	0.124768	RELN/MTRNR2L1	2
CALD1	1	0	1	0	0	NA	0.141836463282985	NA	NA	NA	2.87155676318077e-20	NA	NA	NA	0.282	NA	NA	0.0354591	GO:0015718	monocarboxylic acid transport	2/32	174/18866	0.0350066	0.166324	0.124768	FABP5/ANXA1	2
CIC	1	0	1	0	0	NA	0.141674865130657	NA	NA	NA	1.27721422050228e-21	NA	NA	NA	0.368	NA	NA	0.0354187	GO:0051099	positive regulation of binding	2/32	174/18866	0.0350066	0.166324	0.124768	RAMP1/ANXA2	2
PSMB10	1	0	1	0	0	NA	0.141662792960383	NA	NA	NA	6.31742642504591e-23	NA	NA	NA	0.303	NA	NA	0.0354157	GO:0010829	negative regulation of glucose transmembrane transport	1/32	21/18866	0.0350402	0.166324	0.124768	FABP5	1
HES4	1	0	1	0	0	NA	0.141074679118606	NA	NA	NA	2.07088604505538e-22	NA	NA	NA	0.309	NA	NA	0.0352687	GO:0033630	positive regulation of cell adhesion mediated by integrin	1/32	21/18866	0.0350402	0.166324	0.124768	SFRP2	1
COX20	1	0	1	0	0	NA	0.140831784211614	NA	NA	NA	1.88808457107213e-20	NA	NA	NA	0.413	NA	NA	0.0352079	GO:0035357	peroxisome proliferator activated receptor signaling pathway	1/32	21/18866	0.0350402	0.166324	0.124768	FABP5	1
MPP6	1	0	1	0	0	NA	0.140642719280906	NA	NA	NA	9.28743566155039e-25	NA	NA	NA	0.247	NA	NA	0.0351607	GO:0036507	protein demannosylation	1/32	21/18866	0.0350402	0.166324	0.124768	MAN1A2	1
MYO6	1	0	1	0	0	NA	0.140633346687802	NA	NA	NA	5.97990059618692e-26	NA	NA	NA	0.292	NA	NA	0.0351583	GO:0036508	protein alpha-1,2-demannosylation	1/32	21/18866	0.0350402	0.166324	0.124768	MAN1A2	1
FCGR1A	1	0	1	0	0	NA	0.140386343790295	NA	NA	NA	2.58357178691237e-33	NA	NA	NA	0.196	NA	NA	0.0350966	GO:0043371	negative regulation of CD4-positive, alpha-beta T cell differentiation	1/32	21/18866	0.0350402	0.166324	0.124768	ANXA1	1
CYSTM1	1	0	1	0	0	NA	0.139716608721238	NA	NA	NA	1.60946641632016e-13	NA	NA	NA	0.43	NA	NA	0.0349292	GO:0061003	positive regulation of dendritic spine morphogenesis	1/32	21/18866	0.0350402	0.166324	0.124768	RELN	1
PDK4	1	0	1	0	0	NA	0.13960813578184	NA	NA	NA	5.89639170728493e-26	NA	NA	NA	0.242	NA	NA	0.034902	GO:1902307	positive regulation of sodium ion transmembrane transport	1/32	21/18866	0.0350402	0.166324	0.124768	FXYD1	1
ARHGEF26	1	0	1	0	0	NA	0.139236887239481	NA	NA	NA	1.53110347357428e-37	NA	NA	NA	0.206	NA	NA	0.0348092	GO:2000380	regulation of mesoderm development	1/32	21/18866	0.0350402	0.166324	0.124768	SFRP2	1
DHRS3	1	0	1	0	0	NA	0.139055414317985	NA	NA	NA	9.3711409094831e-31	NA	NA	NA	0.24	NA	NA	0.0347639	GO:1901568	fatty acid derivative metabolic process	2/32	175/18866	0.0353744	0.166324	0.124768	FABP5/ANXA1	2
RAMP2	1	0	1	0	0	NA	0.139023584693963	NA	NA	NA	9.15465193327051e-31	NA	NA	NA	0.188	NA	NA	0.0347559	GO:0030099	myeloid cell differentiation	3/32	431/18866	0.0359968	0.166324	0.124768	FOS/ZFP36/ANXA2	3
IL17RB	1	0	1	0	0	NA	0.138586163286147	NA	NA	NA	1.00003821956746e-31	NA	NA	NA	0.207	NA	NA	0.0346465	GO:0002478	antigen processing and presentation of exogenous peptide antigen	2/32	177/18866	0.0361146	0.166324	0.124768	HLA-B/CALR	2
ICAM2	1	0	1	0	0	NA	0.138430509149324	NA	NA	NA	1.1735495994258e-27	NA	NA	NA	0.241	NA	NA	0.0346076	GO:0052548	regulation of endopeptidase activity	3/32	434/18866	0.0366308	0.166324	0.124768	CD44/SFRP2/ANXA2	3
SZRD1	1	0	1	0	0	NA	0.138379690359176	NA	NA	NA	6.41422269920399e-29	NA	NA	NA	0.248	NA	NA	0.0345949	GO:0006925	inflammatory cell apoptotic process	1/32	22/18866	0.0366787	0.166324	0.124768	ANXA1	1
RELL1	1	0	1	0	0	NA	0.138236189530606	NA	NA	NA	1.76224982550331e-25	NA	NA	NA	0.271	NA	NA	0.034559	GO:0010560	positive regulation of glycoprotein biosynthetic process	1/32	22/18866	0.0366787	0.166324	0.124768	RAMP1	1
UBXN4	1	0	1	0	0	NA	0.138170084132644	NA	NA	NA	1.93101220376417e-21	NA	NA	NA	0.339	NA	NA	0.0345425	GO:0045624	positive regulation of T-helper cell differentiation	1/32	22/18866	0.0366787	0.166324	0.124768	ANXA1	1
TRIM8	1	0	1	0	0	NA	0.137812961510196	NA	NA	NA	8.70810365303942e-20	NA	NA	NA	0.351	NA	NA	0.0344532	GO:0071157	negative regulation of cell cycle arrest	1/32	22/18866	0.0366787	0.166324	0.124768	CALR	1
BHLHE41	1	0	1	0	0	NA	0.13757299197354	NA	NA	NA	2.16785675309347e-23	NA	NA	NA	0.348	NA	NA	0.0343932	GO:0010876	lipid localization	3/32	440/18866	0.0379162	0.166324	0.124768	FABP5/ANXA1/ANXA2	3
SPRY2	1	0	1	0	0	NA	0.13737879821343	NA	NA	NA	1.06939934498437e-21	NA	NA	NA	0.264	NA	NA	0.0343447	GO:0071346	cellular response to interferon-gamma	2/32	182/18866	0.0379912	0.166324	0.124768	CD44/HLA-B	2
ARPC1B	1	0	1	0	0	NA	0.136807268870514	NA	NA	NA	8.23743550095815e-27	NA	NA	NA	0.227	NA	NA	0.0342018	GO:0001919	regulation of receptor recycling	1/32	23/18866	0.0383146	0.166324	0.124768	ANXA2	1
EIF5B	1	0	1	0	0	NA	0.136312466129271	NA	NA	NA	6.27674058159004e-23	NA	NA	NA	0.303	NA	NA	0.0340781	GO:0006541	glutamine metabolic process	1/32	23/18866	0.0383146	0.166324	0.124768	GLUD1	1
LINC01896	1	0	1	0	0	NA	0.136196675888765	NA	NA	NA	5.6882446823718e-27	NA	NA	NA	0.214	NA	NA	0.0340492	GO:0007274	neuromuscular synaptic transmission	1/32	23/18866	0.0383146	0.166324	0.124768	DTNA	1
HES6	1	0	1	0	0	NA	0.136034284928643	NA	NA	NA	5.2200315234261e-22	NA	NA	NA	0.357	NA	NA	0.0340086	GO:0010226	response to lithium ion	1/32	23/18866	0.0383146	0.166324	0.124768	CALR	1
HSD17B12	1	0	1	0	0	NA	0.135506756204278	NA	NA	NA	4.21560935607103e-20	NA	NA	NA	0.291	NA	NA	0.0338767	GO:0032703	negative regulation of interleukin-2 production	1/32	23/18866	0.0383146	0.166324	0.124768	ZFP36	1
PSME1	1	0	1	0	0	NA	0.135053482347513	NA	NA	NA	2.17214621761371e-21	NA	NA	NA	0.351	NA	NA	0.0337634	GO:0032799	low-density lipoprotein receptor particle metabolic process	1/32	23/18866	0.0383146	0.166324	0.124768	ANXA2	1
TLN1	1	0	1	0	0	NA	0.134928767818908	NA	NA	NA	3.96873245018266e-30	NA	NA	NA	0.287	NA	NA	0.0337322	GO:0045723	positive regulation of fatty acid biosynthetic process	1/32	23/18866	0.0383146	0.166324	0.124768	ANXA1	1
N4BP2L2	1	0	1	0	0	NA	0.134892930785905	NA	NA	NA	3.67417559021297e-22	NA	NA	NA	0.326	NA	NA	0.0337232	GO:0070935	3'-UTR-mediated mRNA stabilization	1/32	23/18866	0.0383146	0.166324	0.124768	ZFP36	1
EGFR	1	0	1	0	0	NA	0.134595204150936	NA	NA	NA	6.77126828171556e-26	NA	NA	NA	0.215	NA	NA	0.0336488	GO:1900273	positive regulation of long-term synaptic potentiation	1/32	23/18866	0.0383146	0.166324	0.124768	RELN	1
DHCR7	1	0	1	0	0	NA	0.134372367789017	NA	NA	NA	3.77138403446495e-23	NA	NA	NA	0.295	NA	NA	0.0335931	GO:1902254	negative regulation of intrinsic apoptotic signaling pathway by p53 class mediator	1/32	23/18866	0.0383146	0.166324	0.124768	CD44	1
PPIF	1	0	1	0	0	NA	0.134039069176516	NA	NA	NA	1.39564150641811e-23	NA	NA	NA	0.306	NA	NA	0.0335098	GO:2000050	regulation of non-canonical Wnt signaling pathway	1/32	23/18866	0.0383146	0.166324	0.124768	SFRP2	1
TNFSF13	1	0	1	0	0	NA	0.133799515996341	NA	NA	NA	2.64931721828868e-23	NA	NA	NA	0.256	NA	NA	0.0334499	GO:0006986	response to unfolded protein	2/32	183/18866	0.0383709	0.166324	0.124768	HSPB1/CALR	2
CAT	1	0	1	0	0	NA	0.133772553008347	NA	NA	NA	2.42167714723942e-27	NA	NA	NA	0.264	NA	NA	0.0334431	GO:1903034	regulation of response to wounding	2/32	183/18866	0.0383709	0.166324	0.124768	ANXA1/ANXA2	2
ANAPC16	1	0	1	0	0	NA	0.133625148396078	NA	NA	NA	1.36628961397006e-17	NA	NA	NA	0.363	NA	NA	0.0334063	GO:1901342	regulation of vasculature development	3/32	444/18866	0.038786	0.166324	0.124768	SFRP2/HSPB1/ANXA1	3
PDE4B	1	0	1	0	0	NA	0.132180715612653	NA	NA	NA	2.55769730780601e-21	NA	NA	NA	0.318	NA	NA	0.0330452	GO:0019884	antigen processing and presentation of exogenous antigen	2/32	185/18866	0.0391349	0.166324	0.124768	HLA-B/CALR	2
EMC2	1	0	1	0	0	NA	0.132164450172498	NA	NA	NA	7.83913181942717e-21	NA	NA	NA	0.309	NA	NA	0.0330411	GO:0043488	regulation of mRNA stability	2/32	186/18866	0.0395191	0.166324	0.124768	HSPB1/ZFP36	2
SNHG32	1	0	1	0	0	NA	0.13187472869816	NA	NA	NA	3.29019678646374e-19	NA	NA	NA	0.354	NA	NA	0.0329687	GO:0002407	dendritic cell chemotaxis	1/32	24/18866	0.0399478	0.166324	0.124768	CALR	1
RFTN2	1	0	1	0	0	NA	0.131758405668977	NA	NA	NA	3.10673175457002e-33	NA	NA	NA	0.227	NA	NA	0.0329396	GO:0019883	antigen processing and presentation of endogenous antigen	1/32	24/18866	0.0399478	0.166324	0.124768	HLA-B	1
WWTR1	1	0	1	0	0	NA	0.131264096675062	NA	NA	NA	4.03908623094434e-32	NA	NA	NA	0.203	NA	NA	0.032816	GO:0021511	spinal cord patterning	1/32	24/18866	0.0399478	0.166324	0.124768	RELN	1
MAPRE1	1	0	1	0	0	NA	0.131051988579674	NA	NA	NA	5.0542155177026e-26	NA	NA	NA	0.235	NA	NA	0.032763	GO:0021801	cerebral cortex radial glia guided migration	1/32	24/18866	0.0399478	0.166324	0.124768	RELN	1
TMCO1	1	0	1	0	0	NA	0.131050761169393	NA	NA	NA	3.23937759070523e-21	NA	NA	NA	0.312	NA	NA	0.0327627	GO:0022030	telencephalon glial cell migration	1/32	24/18866	0.0399478	0.166324	0.124768	RELN	1
TRAM1	1	0	1	0	0	NA	0.130800834063497	NA	NA	NA	1.78213903426668e-27	NA	NA	NA	0.259	NA	NA	0.0327002	GO:0031342	negative regulation of cell killing	1/32	24/18866	0.0399478	0.166324	0.124768	HLA-B	1
OSGIN2	1	0	1	0	0	NA	0.130746287293779	NA	NA	NA	6.93415768495932e-24	NA	NA	NA	0.23	NA	NA	0.0326866	GO:0098581	detection of external biotic stimulus	1/32	24/18866	0.0399478	0.166324	0.124768	HLA-B	1
TRIP6	1	0	1	0	0	NA	0.130618851545449	NA	NA	NA	2.30137413176615e-27	NA	NA	NA	0.205	NA	NA	0.0326547	GO:1900118	negative regulation of execution phase of apoptosis	1/32	24/18866	0.0399478	0.166324	0.124768	MTRNR2L1	1
FAAP20	1	0	1	0	0	NA	0.13057710433672	NA	NA	NA	7.50865535965985e-19	NA	NA	NA	0.303	NA	NA	0.0326443	GO:2000637	positive regulation of gene silencing by miRNA	1/32	24/18866	0.0399478	0.166324	0.124768	ZFP36	1
CCDC7	1	0	1	0	0	NA	0.130442703704044	NA	NA	NA	8.25544858284368e-36	NA	NA	NA	0.161	NA	NA	0.0326107	GO:0006417	regulation of translation	3/32	450/18866	0.04011	0.166324	0.124768	HSPB1/ZFP36/CALR	3
HILPDA	1	0	1	0	0	NA	0.130434571148491	NA	NA	NA	2.69742941196481e-27	NA	NA	NA	0.257	NA	NA	0.0326086	GO:0071478	cellular response to radiation	2/32	188/18866	0.0402918	0.166324	0.124768	SFRP2/RGR	2
RYR1	1	0	1	0	0	NA	0.130215682829668	NA	NA	NA	1.75453919466661e-22	NA	NA	NA	0.206	NA	NA	0.0325539	GO:0010565	regulation of cellular ketone metabolic process	2/32	189/18866	0.0406804	0.166324	0.124768	FABP5/ANXA1	2
GRN	1	0	1	0	0	NA	0.130049016831548	NA	NA	NA	7.30837781742552e-18	NA	NA	NA	0.323	NA	NA	0.0325123	GO:0043534	blood vessel endothelial cell migration	2/32	189/18866	0.0406804	0.166324	0.124768	HSPB1/ANXA1	2
PNP	1	0	1	0	0	NA	0.129842878092149	NA	NA	NA	4.82336874266313e-29	NA	NA	NA	0.18	NA	NA	0.0324607	GO:0051090	regulation of DNA-binding transcription factor activity	3/32	455/18866	0.0412309	0.166324	0.124768	ID3/RELN/FOS	3
CTDSP2	1	0	1	0	0	NA	0.129411146078755	NA	NA	NA	7.52024882867461e-18	NA	NA	NA	0.323	NA	NA	0.0323528	GO:0099177	regulation of trans-synaptic signaling	3/32	455/18866	0.0412309	0.166324	0.124768	RELN/FABP5/NSMF	3
HBA1	1	0	1	0	0	NA	0.129387838642784	NA	NA	NA	1.71436646397983e-06	NA	NA	NA	0.156	NA	NA	0.032347	GO:0048167	regulation of synaptic plasticity	2/32	191/18866	0.0414618	0.166324	0.124768	RELN/NSMF	2
RAB13	1	0	1	0	0	NA	0.129344001580426	NA	NA	NA	3.68577488037268e-28	NA	NA	NA	0.23	NA	NA	0.032336	GO:0032366	intracellular sterol transport	1/32	25/18866	0.0415783	0.166324	0.124768	ANXA2	1
CLNS1A	1	0	1	0	0	NA	0.129109558069384	NA	NA	NA	1.13968874824646e-17	NA	NA	NA	0.357	NA	NA	0.0322774	GO:0032367	intracellular cholesterol transport	1/32	25/18866	0.0415783	0.166324	0.124768	ANXA2	1
PTBP1	1	0	1	0	0	NA	0.128871454218813	NA	NA	NA	3.32344586289429e-25	NA	NA	NA	0.273	NA	NA	0.0322179	GO:0045662	negative regulation of myoblast differentiation	1/32	25/18866	0.0415783	0.166324	0.124768	ID3	1
SYPL1	1	0	1	0	0	NA	0.128763255225302	NA	NA	NA	4.10239406722812e-22	NA	NA	NA	0.24	NA	NA	0.0321908	GO:0045992	negative regulation of embryonic development	1/32	25/18866	0.0415783	0.166324	0.124768	SFRP2	1
FCGR2A	1	0	1	0	0	NA	0.128713779208184	NA	NA	NA	4.07328705401136e-30	NA	NA	NA	0.212	NA	NA	0.0321784	GO:0046639	negative regulation of alpha-beta T cell differentiation	1/32	25/18866	0.0415783	0.166324	0.124768	ANXA1	1
MFAP3L	1	0	1	0	0	NA	0.128618067656385	NA	NA	NA	6.66081370347184e-21	NA	NA	NA	0.285	NA	NA	0.0321545	GO:0060148	positive regulation of posttranscriptional gene silencing	1/32	25/18866	0.0415783	0.166324	0.124768	ZFP36	1
RND2	1	0	1	0	0	NA	0.128394992279958	NA	NA	NA	4.39206007110307e-28	NA	NA	NA	0.261	NA	NA	0.0320987	GO:2000311	regulation of AMPA receptor activity	1/32	25/18866	0.0415783	0.166324	0.124768	RELN	1
LINC01578	1	0	1	0	0	NA	0.128054512746694	NA	NA	NA	3.03896777763299e-16	NA	NA	NA	0.407	NA	NA	0.0320136	GO:2001026	regulation of endothelial cell chemotaxis	1/32	25/18866	0.0415783	0.166324	0.124768	HSPB1	1
SELENON	1	0	1	0	0	NA	0.127944921987179	NA	NA	NA	1.3446060359547e-21	NA	NA	NA	0.294	NA	NA	0.0319862	GO:0006979	response to oxidative stress	3/32	458/18866	0.0419112	0.166324	0.124768	FOS/HSPB1/ANXA1	3
PYGM	1	0	1	0	0	NA	0.127749211956269	NA	NA	NA	2.93603568632968e-28	NA	NA	NA	0.193	NA	NA	0.0319373	GO:0071248	cellular response to metal ion	2/32	193/18866	0.0422489	0.166324	0.124768	FOS/CALR	2
ITGA6	1	0	1	0	0	NA	0.127559394884248	NA	NA	NA	1.75942155746886e-24	NA	NA	NA	0.21	NA	NA	0.0318898	GO:0048002	antigen processing and presentation of peptide antigen	2/32	194/18866	0.0426445	0.166324	0.124768	HLA-B/CALR	2
ANP32E	1	0	1	0	0	NA	0.127530897761045	NA	NA	NA	4.97438639655977e-22	NA	NA	NA	0.287	NA	NA	0.0318827	GO:0043487	regulation of RNA stability	2/32	195/18866	0.0430416	0.166324	0.124768	HSPB1/ZFP36	2
ST6GAL1	1	0	1	0	0	NA	0.12743511185646	NA	NA	NA	4.53917863478606e-16	NA	NA	NA	0.261	NA	NA	0.0318588	GO:0050731	positive regulation of peptidyl-tyrosine phosphorylation	2/32	195/18866	0.0430416	0.166324	0.124768	RELN/CD44	2
ECI1	1	0	1	0	0	NA	0.127207355928181	NA	NA	NA	3.25712064566829e-25	NA	NA	NA	0.297	NA	NA	0.0318018	GO:0002683	negative regulation of immune system process	3/32	463/18866	0.0430577	0.166324	0.124768	HLA-B/ZFP36/ANXA1	3
ANKRD9	1	0	1	0	0	NA	0.126894930882703	NA	NA	NA	1.86897019366852e-17	NA	NA	NA	0.345	NA	NA	0.0317237	GO:0002507	tolerance induction	1/32	26/18866	0.0432061	0.166324	0.124768	HLA-B	1
TMED5	1	0	1	0	0	NA	0.126707217497451	NA	NA	NA	1.95345061081463e-22	NA	NA	NA	0.276	NA	NA	0.0316768	GO:0031579	membrane raft organization	1/32	26/18866	0.0432061	0.166324	0.124768	ANXA2	1
CCAR1	1	0	1	0	0	NA	0.126698052293398	NA	NA	NA	2.90956552583625e-17	NA	NA	NA	0.247	NA	NA	0.0316745	GO:0032743	positive regulation of interleukin-2 production	1/32	26/18866	0.0432061	0.166324	0.124768	ANXA1	1
CSTB	1	0	0	0	1	NA	NA	NA	0.126291240801597	NA	NA	NA	6.88831062574115e-06	NA	NA	NA	0.907	0.0315728	GO:0034114	regulation of heterotypic cell-cell adhesion	1/32	26/18866	0.0432061	0.166324	0.124768	CD44	1
MAOA	1	0	1	0	0	NA	0.125899132373139	NA	NA	NA	1.03680997660793e-19	NA	NA	NA	0.279	NA	NA	0.0314748	GO:0035902	response to immobilization stress	1/32	26/18866	0.0432061	0.166324	0.124768	FOS	1
SCAMP2	1	0	1	0	0	NA	0.125653150313921	NA	NA	NA	4.20498499947618e-23	NA	NA	NA	0.236	NA	NA	0.0314133	GO:0042730	fibrinolysis	1/32	26/18866	0.0432061	0.166324	0.124768	ANXA2	1
SKA2	1	0	1	0	0	NA	0.125329962539012	NA	NA	NA	9.89091900210102e-24	NA	NA	NA	0.24	NA	NA	0.0313325	GO:0060074	synapse maturation	1/32	26/18866	0.0432061	0.166324	0.124768	RELN	1
TJP1	1	0	1	0	0	NA	0.125185389788997	NA	NA	NA	2.18679364528682e-23	NA	NA	NA	0.318	NA	NA	0.0312963	GO:0071425	hematopoietic stem cell proliferation	1/32	26/18866	0.0432061	0.166324	0.124768	SFRP2	1
CALCOCO2	1	0	1	0	0	NA	0.125142714153482	NA	NA	NA	1.48097904109973e-23	NA	NA	NA	0.259	NA	NA	0.0312857	GO:0097066	response to thyroid hormone	1/32	26/18866	0.0432061	0.166324	0.124768	ANXA2	1
SLC15A2	1	0	1	0	0	NA	0.124778815602948	NA	NA	NA	7.27191726676854e-21	NA	NA	NA	0.204	NA	NA	0.0311947	GO:1903020	positive regulation of glycoprotein metabolic process	1/32	26/18866	0.0432061	0.166324	0.124768	RAMP1	1
TCF12	1	0	1	0	0	NA	0.124756849604623	NA	NA	NA	4.65700702684937e-23	NA	NA	NA	0.236	NA	NA	0.0311892	GO:0007565	female pregnancy	2/32	196/18866	0.0434401	0.166733	0.125075	FOS/CALR	2
ITGB1	1	0	1	0	0	NA	0.124753861237695	NA	NA	NA	1.85925990432922e-21	NA	NA	NA	0.269	NA	NA	0.0311885	GO:0052547	regulation of peptidase activity	3/32	466/18866	0.0437532	0.167442	0.125607	CD44/SFRP2/ANXA2	3
KIT	1	0	1	0	0	NA	0.124247465962391	NA	NA	NA	1.64645713356877e-22	NA	NA	NA	0.198	NA	NA	0.0310619	GO:0043112	receptor metabolic process	2/32	198/18866	0.0442413	0.167635	0.125752	RAMP1/ANXA2	2
NPAS3	1	0	1	0	0	NA	0.122985728144143	NA	NA	NA	5.4766842116294e-30	NA	NA	NA	0.206	NA	NA	0.0307464	GO:0002825	regulation of T-helper 1 type immune response	1/32	27/18866	0.0448312	0.167635	0.125752	ANXA1	1
LARP7	1	0	1	0	0	NA	0.122762139338219	NA	NA	NA	8.6622539745142e-23	NA	NA	NA	0.221	NA	NA	0.0306905	GO:0009065	glutamine family amino acid catabolic process	1/32	27/18866	0.0448312	0.167635	0.125752	GLUD1	1
BMPR1A	1	0	1	0	0	NA	0.122686541913951	NA	NA	NA	1.06111931575878e-25	NA	NA	NA	0.197	NA	NA	0.0306716	GO:0032897	negative regulation of viral transcription	1/32	27/18866	0.0448312	0.167635	0.125752	ZFP36	1
DARS	1	0	1	0	0	NA	0.122685207142921	NA	NA	NA	5.10590581201679e-20	NA	NA	NA	0.275	NA	NA	0.0306713	GO:0034698	response to gonadotropin	1/32	27/18866	0.0448312	0.167635	0.125752	NSMF	1
ARRDC4	1	0	1	0	0	NA	0.122654622663728	NA	NA	NA	6.48352939513176e-35	NA	NA	NA	0.179	NA	NA	0.0306637	GO:0045672	positive regulation of osteoclast differentiation	1/32	27/18866	0.0448312	0.167635	0.125752	FOS	1
SSR1	1	0	1	0	0	NA	0.122051853094592	NA	NA	NA	5.01628434149529e-18	NA	NA	NA	0.391	NA	NA	0.030513	GO:1900120	regulation of receptor binding	1/32	27/18866	0.0448312	0.167635	0.125752	ANXA2	1
TMEM170A	1	0	1	0	0	NA	0.122027535391738	NA	NA	NA	3.86248972312331e-24	NA	NA	NA	0.206	NA	NA	0.0305069	GO:1902175	regulation of oxidative stress-induced intrinsic apoptotic signaling pathway	1/32	27/18866	0.0448312	0.167635	0.125752	HSPB1	1
DEK	1	0	1	0	0	NA	0.121847369785968	NA	NA	NA	7.4734963718027e-16	NA	NA	NA	0.297	NA	NA	0.0304618	GO:1901654	response to ketone	2/32	200/18866	0.045048	0.167965	0.125999	FOS/CALR	2
SFXN5	1	0	1	0	0	NA	0.121401527055652	NA	NA	NA	0.000101805303778046	NA	NA	NA	0.525	NA	NA	0.0303504	GO:0034341	response to interferon-gamma	2/32	202/18866	0.0458603	0.170506	0.127905	CD44/HLA-B	2
CD59	1	0	1	0	0	NA	0.121128010310802	NA	NA	NA	1.00830118917784e-14	NA	NA	NA	0.914	NA	NA	0.030282	GO:0008544	epidermis development	3/32	477/18866	0.0463521	0.17063	0.127998	FABP5/ZFP36/ANXA1	3
ERGIC3	1	0	1	0	0	NA	0.121097606408231	NA	NA	NA	2.87281542613752e-13	NA	NA	NA	0.369	NA	NA	0.0302744	GO:0001916	positive regulation of T cell mediated cytotoxicity	1/32	28/18866	0.0464536	0.17063	0.127998	HLA-B	1
CCL2	1	0	1	0	0	NA	0.120979497085261	NA	NA	NA	6.90187521328888e-24	NA	NA	NA	0.181	NA	NA	0.0302449	GO:0043901	negative regulation of multi-organism process	1/32	28/18866	0.0464536	0.17063	0.127998	CALR	1
UBALD2	1	0	1	0	0	NA	0.120815704417507	NA	NA	NA	2.72302990201162e-19	NA	NA	NA	0.265	NA	NA	0.0302039	GO:2000463	positive regulation of excitatory postsynaptic potential	1/32	28/18866	0.0464536	0.17063	0.127998	RELN	1
ATP13A4	1	0	1	0	0	NA	0.120737134946826	NA	NA	NA	2.53230729522419e-23	NA	NA	NA	0.21	NA	NA	0.0301843	GO:0060348	bone development	2/32	204/18866	0.046678	0.17063	0.127998	SFRP2/ANXA2	2
EIF3J	1	0	1	0	0	NA	0.120732253290383	NA	NA	NA	2.32365479448876e-16	NA	NA	NA	0.323	NA	NA	0.0301831	GO:1903708	positive regulation of hemopoiesis	2/32	204/18866	0.046678	0.17063	0.127998	FOS/ANXA1	2
XPO1	1	0	1	0	0	NA	0.120669606707146	NA	NA	NA	1.6752115704023e-16	NA	NA	NA	0.394	NA	NA	0.0301674	GO:0035966	response to topologically incorrect protein	2/32	205/18866	0.0470889	0.171409	0.128583	HSPB1/CALR	2
LITAF	1	0	1	0	0	NA	0.120618534128523	NA	NA	NA	7.8983589180809e-24	NA	NA	NA	0.246	NA	NA	0.0301546	GO:0001667	ameboidal-type cell migration	3/32	481/18866	0.0473161	0.171409	0.128583	HSPB1/ANXA1/CALR	3
RIN2	1	0	1	0	0	NA	0.120557022257621	NA	NA	NA	4.69612073836601e-25	NA	NA	NA	0.208	NA	NA	0.0301393	GO:0046890	regulation of lipid biosynthetic process	2/32	207/18866	0.0479147	0.171409	0.128583	FABP5/ANXA1	2
HIF3A	1	0	1	0	0	NA	0.120016074087875	NA	NA	NA	1.96250627423499e-21	NA	NA	NA	0.202	NA	NA	0.030004	GO:0006517	protein deglycosylation	1/32	29/18866	0.0480734	0.171409	0.128583	MAN1A2	1
DAP	1	0	1	0	0	NA	0.120005877549599	NA	NA	NA	4.67906053146375e-21	NA	NA	NA	0.225	NA	NA	0.0300015	GO:0032373	positive regulation of sterol transport	1/32	29/18866	0.0480734	0.171409	0.128583	ANXA2	1
TMEM9B	1	0	1	0	0	NA	0.119780431671403	NA	NA	NA	1.53364943518688e-18	NA	NA	NA	0.31	NA	NA	0.0299451	GO:0032376	positive regulation of cholesterol transport	1/32	29/18866	0.0480734	0.171409	0.128583	ANXA2	1
BBOX1	1	0	1	0	0	NA	0.119721248810287	NA	NA	NA	6.17465967730305e-26	NA	NA	NA	0.204	NA	NA	0.0299303	GO:0033032	regulation of myeloid cell apoptotic process	1/32	29/18866	0.0480734	0.171409	0.128583	ANXA1	1
SRP9	1	0	1	0	0	NA	0.119652702109665	NA	NA	NA	4.31732665323394e-12	NA	NA	NA	0.762	NA	NA	0.0299132	GO:0036336	dendritic cell migration	1/32	29/18866	0.0480734	0.171409	0.128583	CALR	1
IRF2BPL	1	0	1	0	0	NA	0.119286234474666	NA	NA	NA	1.21851209103482e-17	NA	NA	NA	0.316	NA	NA	0.0298216	GO:2000108	positive regulation of leukocyte apoptotic process	1/32	29/18866	0.0480734	0.171409	0.128583	ANXA1	1
PXN	1	0	1	0	0	NA	0.118691395128766	NA	NA	NA	3.13967673602309e-22	NA	NA	NA	0.205	NA	NA	0.0296728	GO:0061013	regulation of mRNA catabolic process	2/32	208/18866	0.0483297	0.171853	0.128916	HSPB1/ZFP36	2
SPTSSA	1	0	1	0	0	NA	0.118655101744208	NA	NA	NA	2.27944814578328e-21	NA	NA	NA	0.221	NA	NA	0.0296638	GO:0002573	myeloid leukocyte differentiation	2/32	210/18866	0.0491635	0.172923	0.129718	FOS/ANXA2	2
CD164	1	0	1	0	0	NA	0.118502516344284	NA	NA	NA	5.99876518979157e-17	NA	NA	NA	0.318	NA	NA	0.0296256	GO:0006612	protein targeting to membrane	2/32	210/18866	0.0491635	0.172923	0.129718	RPL41/RPL36	2
ASRGL1	1	0	1	0	0	NA	0.118413132934852	NA	NA	NA	7.53243440200338e-17	NA	NA	NA	0.279	NA	NA	0.0296033	GO:0034764	positive regulation of transmembrane transport	2/32	210/18866	0.0491635	0.172923	0.129718	RELN/FXYD1	2
ECI2	1	0	1	0	0	NA	0.118398599185602	NA	NA	NA	3.50536489735925e-17	NA	NA	NA	0.257	NA	NA	0.0295996	GO:0043393	regulation of protein binding	2/32	211/18866	0.0495824	0.172923	0.129718	RAMP1/ANXA2	2
ZNRF3	1	0	1	0	0	NA	0.118252345682837	NA	NA	NA	5.44191789620917e-21	NA	NA	NA	0.191	NA	NA	0.0295631	GO:0003401	axis elongation	1/32	30/18866	0.0496906	0.172923	0.129718	SFRP2	1
NSA2	1	0	1	0	0	NA	0.118052849756107	NA	NA	NA	2.08570657687193e-13	NA	NA	NA	0.342	NA	NA	0.0295132	GO:0018279	protein N-linked glycosylation via asparagine	1/32	30/18866	0.0496906	0.172923	0.129718	OST4	1
FBRSL1	1	0	1	0	0	NA	0.117769524540468	NA	NA	NA	9.8193424425756e-16	NA	NA	NA	0.306	NA	NA	0.0294424	GO:0043372	positive regulation of CD4-positive, alpha-beta T cell differentiation	1/32	30/18866	0.0496906	0.172923	0.129718	ANXA1	1
ACOX1	1	0	1	0	0	NA	0.117600650421786	NA	NA	NA	4.65557823018145e-17	NA	NA	NA	0.31	NA	NA	0.0294002	GO:0048265	response to pain	1/32	30/18866	0.0496906	0.172923	0.129718	RELN	1
MPC1	1	0	1	0	0	NA	0.117598718847795	NA	NA	NA	4.67273713626031e-16	NA	NA	NA	0.392	NA	NA	0.0293997
PIK3IP1	1	0	1	0	0	NA	0.117185693595841	NA	NA	NA	9.299129269029e-14	NA	NA	NA	0.287	NA	NA	0.0292964
G3BP1	1	0	1	0	0	NA	0.117160976466532	NA	NA	NA	1.6976542064706e-15	NA	NA	NA	0.308	NA	NA	0.0292902
HEPH	1	0	1	0	0	NA	0.116912987604653	NA	NA	NA	2.77676736440677e-21	NA	NA	NA	0.2	NA	NA	0.0292282
HSDL2	1	0	1	0	0	NA	0.116907273335265	NA	NA	NA	3.03669253076824e-23	NA	NA	NA	0.208	NA	NA	0.0292268
AC019257.1	1	0	1	0	0	NA	0.116785305308984	NA	NA	NA	3.56461872681782e-27	NA	NA	NA	0.195	NA	NA	0.0291963
NME4	1	0	1	0	0	NA	0.116695210272737	NA	NA	NA	2.72705807527515e-17	NA	NA	NA	0.303	NA	NA	0.0291738
TNFSF12	1	0	1	0	0	NA	0.116347252925856	NA	NA	NA	5.74172541831146e-15	NA	NA	NA	0.307	NA	NA	0.0290868
SH3GLB1	1	0	1	0	0	NA	0.116235818919693	NA	NA	NA	8.66705054605328e-18	NA	NA	NA	0.268	NA	NA	0.029059
KANK1	1	0	1	0	0	NA	0.116113307434088	NA	NA	NA	4.85855373866545e-30	NA	NA	NA	0.202	NA	NA	0.0290283
SLC16A9	1	0	1	0	0	NA	0.115756100786246	NA	NA	NA	2.40677712876737e-39	NA	NA	NA	0.139	NA	NA	0.028939
SYNCRIP	1	0	1	0	0	NA	0.115274632491261	NA	NA	NA	3.30680365943695e-14	NA	NA	NA	0.284	NA	NA	0.0288187
PRXL2A	1	0	1	0	0	NA	0.114850173546214	NA	NA	NA	2.93500187863416e-14	NA	NA	NA	0.8	NA	NA	0.0287125
TAX1BP3	1	0	1	0	0	NA	0.11467297152425	NA	NA	NA	7.27203746002309e-22	NA	NA	NA	0.247	NA	NA	0.0286682
ITGB2	1	0	1	0	0	NA	0.114448360827242	NA	NA	NA	2.49058344447323e-27	NA	NA	NA	0.202	NA	NA	0.0286121
GPC4	1	0	1	0	0	NA	0.11438194511233	NA	NA	NA	7.04807454179004e-27	NA	NA	NA	0.166	NA	NA	0.0285955
FKBP5	1	0	1	0	0	NA	0.114007726869735	NA	NA	NA	5.85604244048407e-18	NA	NA	NA	0.287	NA	NA	0.0285019
CASKIN2	1	0	1	0	0	NA	0.113885697261796	NA	NA	NA	7.36586255079592e-22	NA	NA	NA	0.215	NA	NA	0.0284714
SMAD1	1	0	1	0	0	NA	0.113763445665959	NA	NA	NA	6.59900090059094e-23	NA	NA	NA	0.197	NA	NA	0.0284409
SDCCAG8	1	0	1	0	0	NA	0.113441860984603	NA	NA	NA	6.31408871564447e-16	NA	NA	NA	0.206	NA	NA	0.0283605
STMP1	1	0	1	0	0	NA	0.113255346071808	NA	NA	NA	3.32108969069579e-15	NA	NA	NA	0.234	NA	NA	0.0283138
OFD1	1	0	1	0	0	NA	0.113234066099866	NA	NA	NA	8.67699691640759e-22	NA	NA	NA	0.185	NA	NA	0.0283085
RWDD1	1	0	1	0	0	NA	0.113225218784015	NA	NA	NA	1.18736975356018e-12	NA	NA	NA	0.272	NA	NA	0.0283063
HES1	1	0	1	0	0	NA	0.1130297403901	NA	NA	NA	2.772292178108e-24	NA	NA	NA	0.172	NA	NA	0.0282574
G6PC3	1	0	1	0	0	NA	0.113001699906846	NA	NA	NA	3.88333289375539e-16	NA	NA	NA	0.233	NA	NA	0.0282504
RAB34	1	0	1	0	0	NA	0.112906393464769	NA	NA	NA	3.95676447584252e-20	NA	NA	NA	0.218	NA	NA	0.0282266
TPST1	1	0	1	0	0	NA	0.112662478276355	NA	NA	NA	4.75617037667425e-16	NA	NA	NA	0.259	NA	NA	0.0281656
TOR1AIP1	1	0	1	0	0	NA	0.111942095160503	NA	NA	NA	4.31539815451289e-18	NA	NA	NA	0.262	NA	NA	0.0279855
RHPN1	1	0	1	0	0	NA	0.11171472142162	NA	NA	NA	1.46315983244097e-17	NA	NA	NA	0.342	NA	NA	0.0279287
SCRIB	1	0	1	0	0	NA	0.1117088455224	NA	NA	NA	9.89500302989529e-19	NA	NA	NA	0.253	NA	NA	0.0279272
NEMF	1	0	1	0	0	NA	0.111416257934219	NA	NA	NA	6.93499658377899e-14	NA	NA	NA	0.298	NA	NA	0.0278541
FAM167A	1	0	1	0	0	NA	0.111024237926617	NA	NA	NA	2.50001795461636e-28	NA	NA	NA	0.144	NA	NA	0.0277561
GOLGA4	1	0	1	0	0	NA	0.110998206767318	NA	NA	NA	4.29265518950883e-12	NA	NA	NA	0.258	NA	NA	0.0277496
CDK2AP2	1	0	1	0	0	NA	0.110994676560218	NA	NA	NA	1.03023715117658e-18	NA	NA	NA	0.327	NA	NA	0.0277487
ADAMTS1	1	0	1	0	0	NA	0.11095126557289	NA	NA	NA	8.56456951168217e-18	NA	NA	NA	0.216	NA	NA	0.0277378
SDC2	1	0	1	0	0	NA	0.110765368564006	NA	NA	NA	6.82232870724085e-15	NA	NA	NA	0.255	NA	NA	0.0276913
PLEKHO2	1	0	1	0	0	NA	0.110721005341472	NA	NA	NA	4.54089765658033e-22	NA	NA	NA	0.194	NA	NA	0.0276803
HMGB2	1	0	1	0	0	NA	0.110616058765692	NA	NA	NA	4.47931028802958e-19	NA	NA	NA	0.203	NA	NA	0.027654
TMEM176A	1	0	1	0	0	NA	0.110612311243741	NA	NA	NA	9.96555052165041e-24	NA	NA	NA	0.218	NA	NA	0.0276531
NECTIN2	1	0	1	0	0	NA	0.110338766443375	NA	NA	NA	1.65324012481632e-22	NA	NA	NA	0.193	NA	NA	0.0275847
ITPKC	1	0	1	0	0	NA	0.110336883778576	NA	NA	NA	5.20154052668053e-18	NA	NA	NA	0.224	NA	NA	0.0275842
METAP2	1	0	1	0	0	NA	0.11030751527688	NA	NA	NA	2.39574140641795e-17	NA	NA	NA	0.291	NA	NA	0.0275769
TCEAL9	1	0	1	0	0	NA	0.110295806609731	NA	NA	NA	2.92562951676524e-17	NA	NA	NA	0.233	NA	NA	0.027574
DDR2	1	0	1	0	0	NA	0.109990271326517	NA	NA	NA	3.18597829311256e-24	NA	NA	NA	0.153	NA	NA	0.0274976
NT5DC2	1	0	1	0	0	NA	0.109667343128262	NA	NA	NA	3.96029646023859e-17	NA	NA	NA	0.212	NA	NA	0.0274168
SLC41A1	1	0	1	0	0	NA	0.109454589357218	NA	NA	NA	2.00138348666969e-19	NA	NA	NA	0.222	NA	NA	0.0273636
C1orf162	1	0	1	0	0	NA	0.109377460869584	NA	NA	NA	4.27580821597809e-24	NA	NA	NA	0.191	NA	NA	0.0273444
CPT1A	1	0	1	0	0	NA	0.109350293645712	NA	NA	NA	2.35199945978549e-21	NA	NA	NA	0.177	NA	NA	0.0273376
HIGD1B	1	0	1	0	0	NA	0.109230323930525	NA	NA	NA	4.53905908850692e-18	NA	NA	NA	0.191	NA	NA	0.0273076
CRB2	1	0	1	0	0	NA	0.108948694157341	NA	NA	NA	1.09516162009756e-24	NA	NA	NA	0.177	NA	NA	0.0272372
TST	1	0	1	0	0	NA	0.108768048806121	NA	NA	NA	2.812368273711e-22	NA	NA	NA	0.212	NA	NA	0.027192
LDLR	1	0	1	0	0	NA	0.108555501335465	NA	NA	NA	5.01983652224151e-19	NA	NA	NA	0.196	NA	NA	0.0271389
ITGB5	1	0	1	0	0	NA	0.108016097201469	NA	NA	NA	3.39059336654724e-20	NA	NA	NA	0.183	NA	NA	0.027004
TIPARP	1	0	1	0	0	NA	0.107956655360339	NA	NA	NA	4.95621490359674e-20	NA	NA	NA	0.173	NA	NA	0.0269892
TNS2	1	0	1	0	0	NA	0.107268796789304	NA	NA	NA	3.55504299951014e-20	NA	NA	NA	0.229	NA	NA	0.0268172
NWD1	1	0	1	0	0	NA	0.107182479114246	NA	NA	NA	1.57362527985461e-32	NA	NA	NA	0.152	NA	NA	0.0267956
ARHGDIB	1	0	1	0	0	NA	0.107159129049824	NA	NA	NA	3.06108285547976e-19	NA	NA	NA	0.182	NA	NA	0.0267898
IFI30	1	0	1	0	0	NA	0.107108475401948	NA	NA	NA	6.22551649193632e-26	NA	NA	NA	0.194	NA	NA	0.0267771
ELOVL7	1	0	1	0	0	NA	0.1068855589059	NA	NA	NA	2.00272847145444e-18	NA	NA	NA	0.188	NA	NA	0.0267214
S100A13	1	0	0	0	1	NA	NA	NA	0.106793226645246	NA	NA	NA	0.000117577402635573	NA	NA	NA	0.836	0.0266983
C3orf70	1	0	1	0	0	NA	0.106754056611547	NA	NA	NA	2.89060919718429e-18	NA	NA	NA	0.243	NA	NA	0.0266885
TOB2	1	0	1	0	0	NA	0.106685284993085	NA	NA	NA	5.54026068500364e-17	NA	NA	NA	0.227	NA	NA	0.0266713
IRF9	1	0	1	0	0	NA	0.106677494832318	NA	NA	NA	1.01532760055483e-15	NA	NA	NA	0.242	NA	NA	0.0266694
EIF4A1	1	0	1	0	0	NA	0.106670118070347	NA	NA	NA	5.02488488893881e-07	NA	NA	NA	0.705	NA	NA	0.0266675
IL13RA1	1	0	1	0	0	NA	0.10655692071387	NA	NA	NA	4.69681572423269e-22	NA	NA	NA	0.174	NA	NA	0.0266392
PLCD1	1	0	1	0	0	NA	0.106533379234623	NA	NA	NA	1.30773422434303e-25	NA	NA	NA	0.18	NA	NA	0.0266333
WIZ	1	0	1	0	0	NA	0.106489789212388	NA	NA	NA	1.95649997294396e-18	NA	NA	NA	0.271	NA	NA	0.0266224
SALL1	1	0	1	0	0	NA	0.106282240441632	NA	NA	NA	1.86749323326766e-23	NA	NA	NA	0.188	NA	NA	0.0265706
APPL2	1	0	1	0	0	NA	0.106014251695556	NA	NA	NA	1.45356995195916e-18	NA	NA	NA	0.183	NA	NA	0.0265036
PHC2	1	0	1	0	0	NA	0.10581585382772	NA	NA	NA	5.86727454189733e-15	NA	NA	NA	0.392	NA	NA	0.026454
SGCE	1	0	1	0	0	NA	0.105604886368728	NA	NA	NA	1.67534379350582e-16	NA	NA	NA	0.248	NA	NA	0.0264012
PLS3	1	0	1	0	0	NA	0.105566200581796	NA	NA	NA	1.69522737270132e-15	NA	NA	NA	0.252	NA	NA	0.0263916
RPL22L1	1	0	1	0	0	NA	0.105284054236259	NA	NA	NA	1.51634477641133e-14	NA	NA	NA	0.212	NA	NA	0.026321
YIF1A	1	0	1	0	0	NA	0.105082716635828	NA	NA	NA	1.55398241082109e-18	NA	NA	NA	0.23	NA	NA	0.0262707
LRRC32	1	0	1	0	0	NA	0.10460151717359	NA	NA	NA	8.18450702134552e-16	NA	NA	NA	0.17	NA	NA	0.0261504
PHACTR3	1	0	1	0	0	NA	0.104221796584959	NA	NA	NA	4.95162298004375e-13	NA	NA	NA	0.365	NA	NA	0.0260554
LMNA	1	0	1	0	0	NA	0.104137116387372	NA	NA	NA	4.76441597637045e-22	NA	NA	NA	0.241	NA	NA	0.0260343
PSME2	1	0	1	0	0	NA	0.104089611295411	NA	NA	NA	3.17922102182032e-15	NA	NA	NA	0.256	NA	NA	0.0260224
MMP28	1	0	1	0	0	NA	0.104021261669059	NA	NA	NA	6.00802403550558e-21	NA	NA	NA	0.195	NA	NA	0.0260053
ARPC5	1	0	1	0	0	NA	0.103940102331752	NA	NA	NA	5.17337906832941e-15	NA	NA	NA	0.363	NA	NA	0.025985
GFPT2	1	0	1	0	0	NA	0.103483276027986	NA	NA	NA	1.2644503845517e-19	NA	NA	NA	0.177	NA	NA	0.0258708
MIR497HG	1	0	1	0	0	NA	0.103231350779375	NA	NA	NA	4.17067765215077e-20	NA	NA	NA	0.157	NA	NA	0.0258078
PI16	1	0	1	0	0	NA	0.103230108496283	NA	NA	NA	1.33975220663842e-30	NA	NA	NA	0.134	NA	NA	0.0258075
SLTM	1	0	1	0	0	NA	0.103208324204496	NA	NA	NA	2.43329012697073e-12	NA	NA	NA	0.261	NA	NA	0.0258021
TMED7	1	0	1	0	0	NA	0.103102026175835	NA	NA	NA	7.29790144925707e-13	NA	NA	NA	0.297	NA	NA	0.0257755
ALDH4A1	1	0	1	0	0	NA	0.103016768514243	NA	NA	NA	7.81146012126197e-15	NA	NA	NA	0.253	NA	NA	0.0257542
UXT	1	0	1	0	0	NA	0.10301268338839	NA	NA	NA	6.75406456230644e-14	NA	NA	NA	0.273	NA	NA	0.0257532
LY86	1	0	1	0	0	NA	0.102845646332588	NA	NA	NA	6.79677168669428e-23	NA	NA	NA	0.138	NA	NA	0.0257114
NOTCH1	1	0	1	0	0	NA	0.102168723526155	NA	NA	NA	7.69445556440394e-22	NA	NA	NA	0.18	NA	NA	0.0255422
SERPINH1	1	0	1	0	0	NA	0.102010033760613	NA	NA	NA	1.70567885963597e-16	NA	NA	NA	0.176	NA	NA	0.0255025
ALDH1A1	1	0	1	0	0	NA	0.101955197289284	NA	NA	NA	8.71063647306873e-18	NA	NA	NA	0.181	NA	NA	0.0254888
KMT2E	1	0	1	0	0	NA	0.101872513692228	NA	NA	NA	2.58314403054609e-13	NA	NA	NA	0.294	NA	NA	0.0254681
EGLN3	1	0	1	0	0	NA	0.101617298782415	NA	NA	NA	4.24399347228469e-26	NA	NA	NA	0.168	NA	NA	0.0254043
ALOX5AP	1	0	1	0	0	NA	0.10127833156157	NA	NA	NA	1.51213920120826e-22	NA	NA	NA	0.189	NA	NA	0.0253196
RGMA	1	0	1	0	0	NA	0.101203005498693	NA	NA	NA	3.66686790427432e-16	NA	NA	NA	0.228	NA	NA	0.0253008
RAP1B	1	0	1	0	0	NA	0.100975554643813	NA	NA	NA	4.08117962078707e-13	NA	NA	NA	0.282	NA	NA	0.0252439
OTOS	1	0	1	0	0	NA	0.100882270758431	NA	NA	NA	2.26649390983386e-23	NA	NA	NA	0.142	NA	NA	0.0252206
HLA-DQB1	1	0	1	0	0	NA	0.100837354222471	NA	NA	NA	1.43395350430408e-18	NA	NA	NA	0.149	NA	NA	0.0252093
TOP1	1	0	1	0	0	NA	0.100678719708679	NA	NA	NA	1.30591734410182e-11	NA	NA	NA	0.259	NA	NA	0.0251697
SLC16A1	1	0	1	0	0	NA	0.100548790892976	NA	NA	NA	5.79216583916629e-15	NA	NA	NA	0.205	NA	NA	0.0251372
HNMT	1	0	1	0	0	NA	0.100206031117184	NA	NA	NA	7.99233835720494e-23	NA	NA	NA	0.149	NA	NA	0.0250515
PTAR1	1	0	1	0	0	NA	0.100105647988157	NA	NA	NA	8.11210047609697e-18	NA	NA	NA	0.217	NA	NA	0.0250264
GRAMD1C	1	0	1	0	0	NA	0.100088440025918	NA	NA	NA	1.68668454854808e-20	NA	NA	NA	0.155	NA	NA	0.0250221
MSRB2	1	0	1	0	0	NA	0.100070491205531	NA	NA	NA	3.78616682676562e-15	NA	NA	NA	0.315	NA	NA	0.0250176

## Sheet: Layer 2_up_DEG
The following spreadsheets are derived from DEGs analysis for layer 1 to layer 6, and white matter. In those spreadsheets, column A indicates gene ID. Column B indicates the number of overlapping genes from four samples. Column G to column J indicates the log fold change of four samples in the same order. Column K to column N indicates the p-value. Column O to column R indicates the proportion of…
Gene	contribution summary					logFC (e as base, cutoff >= 0.1)				p-value (Wilcoxon test, cutoff <= 0.05)				proportion of spots express the gene in this layer				mean logFC (e as base) of four samples	GO enrichment analysis									KEGG pathway analysis									Reactome analysis
ID	overlap	CT2.contribute	CT1.contribute	AD1.contribute	AD2.contribute	CT2.Layer 1_up_logFC	CT1.Layer 1_up_logFC	AD1.Layer 1_up_logFC	AD2.Layer 1_up_logFC	CT2.Layer 1_up_pval	CT1.Layer 1_up_pval	AD1.Layer 1_up_pval	AD2.Layer 1_up_pval	CT2.Layer 1_pct.1	CT1.Layer 1_pct.1	AD1.Layer 1_pct.1	AD2.Layer 1_pct.1	mean_logfc	ID	Description	GeneRatio	BgRatio	pvalue	p.adjust	qvalue	geneID	Count	ID	Description	GeneRatio	BgRatio	pvalue	p.adjust	qvalue	geneID	Count	ID	Description	GeneRatio	BgRatio	pvalue	p.adjust	qvalue	geneID	Count
WFS1	4	1	1	1	1	0.128210215292068	0.25145049620801	0.277909828886983	0.117081953788898	1.36757768462176e-11	5.20337719289493e-45	7.80111623617472e-17	5.20699165836444e-08	0.764	0.771	0.741	0.62	0.193663	GO:0050804	modulation of chemical synaptic transmission	15/139	454/18866	1.33327e-06	0.00160923	0.00150355	CPLX2/CALB2/AKAP5/BAIAP2/PTK2B/VGF/DGKB/DTNBP1/SLC8A2/RIN1/IGSF9B/NLGN2/ABR/GRIN2C/LRFN2	15	hsa05211	Renal cell carcinoma	5/59	69/8108	0.00013517	0.024601	0.022481	ARNT2/PAK6/JUN/BRAF/FLCN	5	R-HSA-8957275	Post-translational protein phosphorylation	5/87	108/10704	0.00182676	0.238395	0.23243	WFS1/RCN1/VGF/IGFBP4/MIA3	5
PDE8B	3	1	1	1	0	0.216314578116418	0.346081557299478	0.329203123274534	NA	3.41137415564925e-25	2.41795372862767e-114	1.98861623923996e-34	NA	0.515	0.581	0.647	NA	0.2229	GO:0099177	regulation of trans-synaptic signaling	15/139	455/18866	1.37014e-06	0.00160923	0.00150355	CPLX2/CALB2/AKAP5/BAIAP2/PTK2B/VGF/DGKB/DTNBP1/SLC8A2/RIN1/IGSF9B/NLGN2/ABR/GRIN2C/LRFN2	15	hsa04657	IL-17 signaling pathway	4/59	94/8108	0.00473949	0.228765	0.209051	JUN/CEBPB/MAPK14/MAPK4/MAPK4	4	R-HSA-450341	Activation of the AP-1 family of transcription factors	2/87	10/10704	0.0028169	0.238395	0.23243	JUN/MAPK14	2
LRATD1	3	1	1	1	0	0.101188768742928	0.356905734565205	0.413890402260646	NA	0.000189248413850028	3.13414760143789e-86	2.06467075799555e-50	NA	0.638	0.768	0.675	NA	0.217996	GO:0050806	positive regulation of synaptic transmission	9/139	172/18866	5.24375e-06	0.00410586	0.00383622	CALB2/AKAP5/BAIAP2/PTK2B/DTNBP1/SLC8A2/IGSF9B/NLGN2/GRIN2C	9	hsa01522	Endocrine resistance	4/59	98/8108	0.00549478	0.228765	0.209051	JUN/BRAF/MAPK14/JAG1	4	R-HSA-381426	Regulation of Insulin-like Growth Factor (IGF) transport and uptake by Insulin-like Growth Factor Binding Proteins (IGFBPs)	5/87	125/10704	0.00345191	0.238395	0.23243	WFS1/RCN1/VGF/IGFBP4/MIA3	5
CPLX2	3	1	1	1	0	0.118574168971352	0.284902557314049	0.397748205954564	NA	9.84731952327528e-18	7.5806527563442e-76	1.20770578864496e-40	NA	1	0.996	0.99	NA	0.200306	GO:0048167	regulation of synaptic plasticity	9/139	191/18866	1.2228e-05	0.00718088	0.0067093	CPLX2/CALB2/AKAP5/BAIAP2/PTK2B/VGF/SLC8A2/RIN1/GRIN2C	9	hsa05231	Choline metabolism in cancer	4/59	98/8108	0.00549478	0.228765	0.209051	DGKB/JUN/DGKA/CHKB	4	R-HSA-9664420	Killing mechanisms	2/87	12/10704	0.00408804	0.238395	0.23243	JUN/NOXA1	2
CALB2	3	1	0	1	1	0.223172809376985	NA	0.2642021268583	0.290359246512598	4.12469130015591e-23	NA	1.7545128601758e-15	7.77973944773984e-51	0.467	NA	0.42	0.475	0.194434	GO:0099565	chemical synaptic transmission, postsynaptic	7/139	112/18866	1.92699e-05	0.00905301	0.00845848	BAIAP2/SEZ6/PTK2B/SLC8A2/IGSF9B/NLGN2/GRIN2C	7	hsa05161	Hepatitis B	5/59	162/8108	0.00628475	0.228765	0.209051	PTK2B/JUN/SMAD4/BRAF/MAPK14	5	R-HSA-9673324	WNT5:FZD7-mediated leishmania damping	2/87	12/10704	0.00408804	0.238395	0.23243	JUN/NOXA1	2
MOB1B	3	1	1	1	0	0.166564430724516	0.311943761065826	0.290941644637996	NA	5.60759827802387e-17	1.78342066244789e-96	1.05269223489853e-27	NA	0.421	0.479	0.591	NA	0.192362	GO:0050808	synapse organization	12/139	433/18866	8.83382e-05	0.0322588	0.0301403	BAIAP2/SEZ6/NTRK3/PCDH8/DGKB/ADGRB2/SLC8A2/FGF13/IGSF9B/NLGN2/MAPK14/LRFN2	12	hsa04668	TNF signaling pathway	4/59	112/8108	0.00876386	0.265837	0.242928	JUN/CEBPB/MAPK14/JAG1	4	R-HSA-166520	Signaling by NTRKs	5/87	134/10704	0.00464261	0.238395	0.23243	NTRK3/VGF/BRAF/MAPK14/EGR4	5
AKAP5	3	1	1	1	0	0.109982720489977	0.281486984908115	0.344430511228546	NA	3.17216280479033e-11	1.3449396185601e-94	6.87469991823192e-44	NA	0.303	0.435	0.556	NA	0.183975	GO:0060078	regulation of postsynaptic membrane potential	7/139	144/18866	9.6131e-05	0.0322588	0.0301403	BAIAP2/SEZ6/PTK2B/SLC8A2/IGSF9B/NLGN2/GRIN2C	7	hsa04722	Neurotrophin signaling pathway	4/59	119/8108	0.0107926	0.280608	0.256426	NTRK3/JUN/BRAF/MAPK14	4	R-HSA-425561	Sodium/Calcium exchangers	2/87	13/10704	0.00480589	0.238395	0.23243	SLC24A4/SLC8A2	2
C1QL2	3	1	1	1	0	0.164259091078873	0.337067417734762	0.209227806019259	NA	1.79040162455189e-26	2.31408815517747e-155	7.45590295076224e-21	NA	0.298	0.449	0.406	NA	0.177639	GO:0060079	excitatory postsynaptic potential	6/139	103/18866	0.000114234	0.0335418	0.0313391	BAIAP2/SEZ6/PTK2B/SLC8A2/NLGN2/GRIN2C	6	hsa04068	FoxO signaling pathway	4/59	131/8108	0.0149349	0.327541	0.299315	CCNG2/SMAD4/BRAF/MAPK14	4	R-HSA-6794362	Protein-protein interactions at synapses	4/87	86/10704	0.00521082	0.238395	0.23243	NTRK3/NLGN2/GRIN2C/LRFN2	4
SOWAHA	3	1	1	1	0	0.125144376657823	0.204274805045763	0.353531767021882	NA	9.32284780632313e-09	6.94084654995844e-36	2.86950937194978e-31	NA	0.667	0.76	0.825	NA	0.170738	GO:0050807	regulation of synapse organization	8/139	229/18866	0.000300365	0.0771516	0.072085	BAIAP2/NTRK3/PCDH8/DGKB/ADGRB2/NLGN2/MAPK14/LRFN2	8	hsa05135	Yersinia infection	4/59	137/8108	0.017337	0.327541	0.299315	BAIAP2/PTK2B/JUN/MAPK14	4	R-HSA-9617828	FOXO-mediated transcription of cell cycle genes	2/87	17/10704	0.00820475	0.33366	0.325311	CCNG2/SMAD4	2
STXBP6	3	1	1	1	0	0.124845664482884	0.327789161167696	0.169429185892914	NA	2.52898329377237e-09	2.07328688087248e-96	1.8678731116409e-09	NA	0.436	0.545	0.385	NA	0.155516	GO:0098815	modulation of excitatory postsynaptic potential	4/139	45/18866	0.000332589	0.0771516	0.072085	BAIAP2/PTK2B/SLC8A2/NLGN2	4	hsa04024	cAMP signaling pathway	5/59	219/8108	0.0210951	0.327541	0.299315	JUN/SSTR1/BRAF/GRIN2C/VIP	5	R-HSA-2028269	Signaling by Hippo	2/87	20/10704	0.0112831	0.400138	0.390126	MOB1B/NPHP4	2
FRRS1L	3	0	1	1	1	NA	0.251714617964284	0.204030541416196	0.15265647762208	NA	3.04123872514492e-42	2.16628779788244e-11	7.29418825902219e-10	NA	0.799	0.843	0.797	0.1521	GO:0050890	cognition	9/139	302/18866	0.000407995	0.0771516	0.072085	PAK6/JUN/MEIS2/SLC8A2/FGF13/RIN1/CEBPB/SOBP/VIP	9	hsa04072	Phospholipase D signaling pathway	4/59	148/8108	0.0223415	0.327541	0.299315	PTK2B/DGKB/DGKA/KITLG	4	R-HSA-8849932	Synaptic adhesion-like molecules	2/87	21/10704	0.0124055	0.400138	0.390126	GRIN2C/LRFN2	2
NEUROD1	3	1	1	1	0	0.113423860379826	0.246096595393979	0.240693297968564	NA	3.48450413817437e-16	6.70593645348411e-116	4.56318575069123e-43	NA	0.206	0.306	0.29	NA	0.150053	GO:0050803	regulation of synapse structure or activity	8/139	240/18866	0.00041099	0.0771516	0.072085	BAIAP2/NTRK3/PCDH8/DGKB/ADGRB2/NLGN2/MAPK14/LRFN2	8	hsa04012	ErbB signaling pathway	3/59	85/8108	0.0237224	0.327541	0.299315	PAK6/JUN/BRAF	3	R-HSA-198725	Nuclear Events (kinase and transcription factor activation)	3/87	61/10704	0.0132979	0.400138	0.390126	VGF/MAPK14/EGR4	3
PNCK	3	0	1	1	1	NA	0.273702493550596	0.199389950819574	0.118551029156326	NA	1.4727518912713e-55	3.32264144958877e-11	2.23975678510782e-06	NA	0.819	0.815	0.792	0.147911	GO:0042391	regulation of membrane potential	11/139	443/18866	0.000446556	0.0771516	0.072085	BAIAP2/SEZ6/NTRK3/PTK2B/JUN/SLC8A2/FGF13/IGSF9B/NLGN2/GRIN2C/HTR3B	11	hsa05210	Colorectal cancer	3/59	86/8108	0.0244553	0.327541	0.299315	JUN/SMAD4/BRAF	3	R-HSA-187037	Signaling by NTRK1 (TRKA)	4/87	115/10704	0.0142126	0.400138	0.390126	VGF/BRAF/MAPK14/EGR4	4
BAIAP2	3	1	1	1	0	0.120297802658896	0.275045491022206	0.195190460086459	NA	2.09831257063454e-08	3.16535625548963e-51	1.04949047282507e-08	NA	0.8	0.823	0.839	NA	0.147633	GO:0060291	long-term synaptic potentiation	5/139	87/18866	0.000459823	0.0771516	0.072085	CALB2/AKAP5/PTK2B/SLC8A2/GRIN2C	5	hsa04658	Th1 and Th2 cell differentiation	3/59	92/8108	0.0291089	0.327541	0.299315	JUN/MAPK14/JAG1	3	R-HSA-5668599	RHO GTPases Activate NADPH Oxidases	2/87	24/10704	0.0160499	0.419589	0.409091	NOXA1/MAPK14	2
MAN1A1	3	1	1	1	0	0.128389266173207	0.215887062441982	0.245120006063993	NA	5.8993649589988e-16	1.56938666933203e-79	7.85325243246948e-29	NA	0.297	0.315	0.472	NA	0.147349	GO:0050873	brown fat cell differentiation	4/139	50/18866	0.000499655	0.078246	0.0731074	ARL4A/CEBPB/MAPK14/FLCN	4	hsa04020	Calcium signaling pathway	5/59	240/8108	0.0298502	0.327541	0.299315	GNAL/NTRK3/PTK2B/SLC8A2/GRIN2C	5	R-HSA-112316	Neuronal System	8/87	410/10704	0.0180964	0.441551	0.430503	AKAP5/CAMKK1/GNAL/NTRK3/NLGN2/GRIN2C/HTR3B/LRFN2	8
TP53I11	3	1	1	1	0	0.103259545493387	0.18520453989077	0.283259478634224	NA	7.39180605333742e-11	5.04113966736931e-48	2.43633021302658e-25	NA	0.355	0.301	0.507	NA	0.142931	GO:0007611	learning or memory	8/139	260/18866	0.000696078	0.0927334	0.0866434	PAK6/JUN/MEIS2/SLC8A2/FGF13/RIN1/CEBPB/VIP	8	hsa04912	GnRH signaling pathway	3/59	93/8108	0.0299272	0.327541	0.299315	PTK2B/JUN/MAPK14	3	R-HSA-114508	Effects of PIP2 hydrolysis	2/87	27/10704	0.0200932	0.459632	0.448131	DGKB/DGKA	2
FAM153CP	3	1	1	1	0	0.103043018037915	0.231871350261606	0.203002893394355	NA	6.27255994056255e-07	2.47774182394608e-72	5.52175633303946e-17	NA	0.414	0.388	0.469	NA	0.134479	GO:0007612	learning	6/139	145/18866	0.000721889	0.0927334	0.0866434	PAK6/JUN/MEIS2/SLC8A2/FGF13/RIN1	6	hsa04070	Phosphatidylinositol signaling system	3/59	97/8108	0.0333213	0.327541	0.299315	DGKB/DGKA/MTMR7	3	R-HSA-159236	Transport of Mature mRNA derived from an Intron-Containing Transcript	3/87	75/10704	0.0230121	0.495436	0.48304	THOC3/CDC40/NXF1	3
SEZ6	3	0	1	1	1	NA	0.210154204966385	0.14520303073421	0.171592548287638	NA	1.31071819495951e-48	8.2648400571713e-09	1.77843007968323e-19	NA	0.345	0.406	0.433	0.131737	GO:0045637	regulation of myeloid cell differentiation	8/139	263/18866	0.000750031	0.0927334	0.0866434	PTK2B/JUN/MEIS2/KITLG/CEBPB/PURB/MAPK14/JAG1	8	hsa00564	Glycerophospholipid metabolism	3/59	98/8108	0.0342	0.327541	0.299315	DGKB/DGKA/CHKB	3	R-HSA-112314	Neurotransmitter receptors and postsynaptic signal transmission	5/87	205/10704	0.0255929	0.502167	0.489602	AKAP5/CAMKK1/GNAL/GRIN2C/HTR3B	5
FBLN5	3	0	1	1	1	NA	0.147807799736174	0.143366624373135	0.123434914101402	NA	1.73059757128228e-52	1.10141763601309e-14	1.62867429669197e-19	NA	0.216	0.196	0.227	0.103652	GO:0031644	regulation of nervous system process	6/139	148/18866	0.000803472	0.0927334	0.0866434	BAIAP2/PTK2B/SLC8A2/IGSF9B/NLGN2/VIP	6	hsa04914	Progesterone-mediated oocyte maturation	3/59	100/8108	0.0359935	0.327541	0.299315	BRAF/MAPK14/KIF22	3	R-HSA-450282	MAPK targets/ Nuclear events mediated by MAP kinases	2/87	31/10704	0.0260688	0.502167	0.489602	JUN/MAPK14	2
PSD	3	0	1	1	1	NA	0.11914082751134	0.113665734645513	0.107621258642199	NA	3.57442635201965e-17	2.21153280585923e-05	6.65087847564455e-09	NA	0.95	0.972	0.976	0.085107	GO:0001541	ovarian follicle development	4/139	57/18866	0.000823574	0.0927334	0.0866434	VGF/KITLG/SMAD4/CEBPB	4	hsa04933	AGE-RAGE signaling pathway in diabetic complications	3/59	100/8108	0.0359935	0.327541	0.299315	JUN/SMAD4/MAPK14	3	R-HSA-2173796	SMAD2/SMAD3:SMAD4 heterotrimer regulates transcription	2/87	32/10704	0.0276621	0.506216	0.49355	SMAD4/CDK9	2
MOXD1	3	0	1	1	1	NA	0.104303816538728	0.105187605621106	0.101535386290454	NA	1.43988694917937e-25	2.21020399600472e-09	4.36003892049474e-13	NA	0.191	0.241	0.252	0.0777567	GO:0043547	positive regulation of GTPase activity	10/139	406/18866	0.000864963	0.0927334	0.0866434	NTRK3/PTK2B/JUN/RIN1/RGS12/ABR/TBC1D1/AGFG1/ARHGAP6/FLCN	10	hsa05142	Chagas disease	3/59	102/8108	0.037835	0.327903	0.299646	GNAL/JUN/MAPK14	3	R-HSA-72202	Transport of Mature Transcript to Cytoplasm	3/87	84/10704	0.0308346	0.515109	0.50222	THOC3/CDC40/NXF1	3
HPCAL1	2	1	1	0	0	0.311233090966591	0.66390055912774	NA	NA	1.55362637147958e-44	9.47129672659479e-221	NA	NA	0.87	0.971	NA	NA	0.243783	GO:0043087	regulation of GTPase activity	11/139	481/18866	0.000880334	0.0927334	0.0866434	NTRK3/PTK2B/JUN/RIN1/RGS12/ABR/TBC1D1/AGFG1/FGD1/ARHGAP6/FLCN	11	hsa04660	T cell receptor signaling pathway	3/59	104/8108	0.0397242	0.328627	0.300307	PAK6/JUN/MAPK14	3	R-HSA-187687	Signalling to ERKs	2/87	34/10704	0.0309628	0.515109	0.50222	BRAF/MAPK14	2
CAMKK1	2	0	1	1	0	NA	0.397082060592406	0.316064272661286	NA	NA	1.11274903750394e-101	1.21436692600802e-24	NA	NA	0.888	0.825	NA	0.178287	GO:0007215	glutamate receptor signaling pathway	5/139	101/18866	0.000907989	0.0927334	0.0866434	FRRS1L/PTK2B/SSTR1/NLGN2/GRIN2C	5	hsa04659	Th17 cell differentiation	3/59	107/8108	0.0426467	0.337465	0.308384	JUN/SMAD4/MAPK14	3	R-HSA-418346	Platelet homeostasis	3/87	88/10704	0.034706	0.523138	0.510049	PDE2A/SLC8A2/MAPK14	3
FAM106A	2	0	1	1	0	NA	0.420299609264107	0.179901112364119	NA	NA	8.22053412966184e-153	2.52937524504854e-17	NA	NA	0.594	0.535	NA	0.15005	GO:0016049	cell growth	11/139	490/18866	0.00102287	0.0939881	0.0878157	FBLN5/NTRK3/PTK2B/PAK6/TSPYL2/IGFBP4/FGF13/SMAD4/AUTS2/SEMA5B/FLCN	11	hsa05030	Cocaine addiction	2/59	49/8108	0.049218	0.373236	0.341072	JUN/GRIN2C	2	R-HSA-9031628	NGF-stimulated transcription	2/87	39/10704	0.0398481	0.523138	0.510049	VGF/EGR4	2
DPP6	2	0	1	1	0	NA	0.332154022106415	0.250923155612668	NA	NA	5.78036180645041e-77	1.56301021239962e-15	NA	NA	0.886	0.794	NA	0.145769	GO:0007265	Ras protein signal transduction	9/139	346/18866	0.0010742	0.0939881	0.0878157	PSD/JUN/PRAG1/KITLG/CDH13/AUTS2/MAPK14/ARHGAP6/FLCN	9										R-HSA-381119	Unfolded Protein Response (UPR)	3/87	94/10704	0.0409626	0.523138	0.510049	WFS1/TSPYL2/CEBPB	3
GNAL	2	1	1	0	0	0.130699318031225	0.430822122811374	NA	NA	7.76624894653402e-16	1.76242199137505e-140	NA	NA	0.378	0.622	NA	NA	0.14038	GO:0031532	actin cytoskeleton reorganization	5/139	105/18866	0.00108126	0.0939881	0.0878157	BAIAP2/NTRK3/PTK2B/DTNBP1/AUTS2	5										R-HSA-4420097	VEGFA-VEGFR2 Pathway	3/87	99/10704	0.0465822	0.523138	0.510049	BAIAP2/PTK2B/MAPK14	3
NTRK3	2	0	1	1	0	NA	0.291391850628815	0.268355616082172	NA	NA	7.79547338916175e-66	4.65574858169888e-21	NA	NA	0.699	0.731	NA	0.139937	GO:0099560	synaptic membrane adhesion	3/139	28/18866	0.00112034	0.0939881	0.0878157	PCDH8/IGSF9B/MAPK14	3										R-HSA-2173793	Transcriptional activity of SMAD2/SMAD3:SMAD4 heterotrimer	2/87	44/10704	0.049571	0.523138	0.510049	SMAD4/CDK9	2
CAMK2N1	2	1	0	1	0	0.140902108274809	NA	0.377280904146711	NA	1.4331713988704e-21	NA	6.42676678289681e-52	NA	1	NA	1	NA	0.129546	GO:2000463	positive regulation of excitatory postsynaptic potential	3/139	28/18866	0.00112034	0.0939881	0.0878157	BAIAP2/PTK2B/NLGN2	3
RCN1	2	0	1	1	0	NA	0.273284390105715	0.229372989608077	NA	NA	1.31234975894179e-73	1.79193600306002e-22	NA	NA	0.524	0.507	NA	0.125664	GO:0031646	positive regulation of nervous system process	4/139	65/18866	0.00134893	0.109264	0.102088	BAIAP2/PTK2B/IGSF9B/NLGN2	4
PDE2A	2	0	1	1	0	NA	0.218448047855695	0.281564358475114	NA	NA	1.12925715861742e-38	1.20283739996844e-21	NA	NA	0.824	0.916	NA	0.125003	GO:0007613	memory	5/139	121/18866	0.00202713	0.158725	0.148301	PAK6/SLC8A2/FGF13/RIN1/CEBPB	5
ARNT2	2	1	1	0	0	0.105615910624847	0.388062286848738	NA	NA	1.48533420823592e-07	8.33864375843635e-109	NA	NA	0.883	0.957	NA	NA	0.12342	GO:0097050	type B pancreatic cell apoptotic process	2/139	10/18866	0.00233314	0.171502	0.160239	WFS1/NEUROD1	2
PTK2B	2	1	0	1	0	0.145588832701887	NA	0.343490559602998	NA	1.45649872999077e-13	NA	1.29373977548979e-31	NA	0.94	NA	0.944	NA	0.12227	GO:0001952	regulation of cell-matrix adhesion	5/139	125/18866	0.00233634	0.171502	0.160239	PTK2B/PLEKHA2/CDH13/ARHGAP6/JAG1	5
PCDH8	2	1	0	1	0	0.157565862713469	NA	0.330197653441042	NA	5.50903156626012e-14	NA	2.38586137989522e-40	NA	0.488	NA	0.559	NA	0.121941	GO:0051056	regulation of small GTPase mediated signal transduction	8/139	323/18866	0.00274451	0.191061	0.178514	PSD/PRAG1/KITLG/AUTS2/ABR/FGD1/ARHGAP6/FLCN	8
MGP	2	1	1	0	0	0.14359982786174	0.330130131084769	NA	NA	7.92130815793133e-21	1.64551802299383e-125	NA	NA	0.253	0.435	NA	NA	0.118432	GO:0031016	pancreas development	4/139	79/18866	0.00276547	0.191061	0.178514	WFS1/NEUROD1/MEIS2/RFX3	4
VGF	2	0	1	1	0	NA	0.222821932382667	0.250541154515558	NA	NA	2.81891702420814e-65	2.45977954278965e-25	NA	NA	0.399	0.427	NA	0.118341	GO:2000249	regulation of actin cytoskeleton reorganization	3/139	39/18866	0.00294615	0.197729	0.184744	BAIAP2/NTRK3/PTK2B	3
DGKB	2	1	1	0	0	0.100331847613225	0.346441661629269	NA	NA	1.92104617431592e-07	7.69556298403622e-110	NA	NA	0.449	0.593	NA	NA	0.111693	GO:0009187	cyclic nucleotide metabolic process	3/139	40/18866	0.00316801	0.206713	0.193138	PDE8B/PDE2A/AMPD2	3
PLEKHA2	2	1	0	1	0	0.105861287123507	NA	0.339990915050799	NA	1.66963724069891e-07	NA	4.43495381740156e-38	NA	0.485	NA	0.682	NA	0.111463	GO:0007212	dopamine receptor signaling pathway	3/139	41/18866	0.00339986	0.210165	0.196363	GNAL/DTNBP1/KLF16	3
PAK6	2	0	1	1	0	NA	0.208286834655172	0.218559254892267	NA	NA	7.83115747885187e-62	4.54829570708416e-19	NA	NA	0.384	0.49	NA	0.106712	GO:0031062	positive regulation of histone methylation	3/139	41/18866	0.00339986	0.210165	0.196363	RIF1/SMAD4/AUTS2	3
C1QTNF4	2	0	1	1	0	NA	0.209232550977919	0.216728170490673	NA	NA	1.71156196907909e-37	5.10569946007774e-13	NA	NA	0.833	0.801	NA	0.10649	GO:0043405	regulation of MAP kinase activity	8/139	342/18866	0.00388019	0.231297	0.216107	NTRK3/PTK2B/DTNBP1/KITLG/DUSP14/LIME1/BRAF/MAPK14	8
SLC24A4	2	0	1	1	0	NA	0.212986051318897	0.204118362512134	NA	NA	5.30520186367254e-65	2.53427898799922e-29	NA	NA	0.331	0.339	NA	0.104276	GO:0001558	regulation of cell growth	9/139	420/18866	0.00397181	0.231297	0.216107	FBLN5/NTRK3/PTK2B/TSPYL2/IGFBP4/FGF13/SMAD4/SEMA5B/FLCN	9
JUN	2	0	1	1	0	NA	0.121270527633433	0.291007853012326	NA	NA	2.54886246402247e-14	5.14014873161626e-20	NA	NA	0.662	0.689	NA	0.10307	GO:1903312	negative regulation of mRNA metabolic process	4/139	88/18866	0.00407934	0.231297	0.216107	ANGEL2/MAPK14/VIP/CDK9	4
ART3	2	0	1	1	0	NA	0.279657196436603	0.123554503607256	NA	NA	1.21676870230784e-98	1.45528605803575e-13	NA	NA	0.413	0.196	NA	0.100803	GO:0035329	hippo signaling	3/139	44/18866	0.00415671	0.231297	0.216107	MOB1B/MAPK14/NPHP4	3
DTNBP1	2	0	1	1	0	NA	0.132745586802858	0.270285903776324	NA	NA	9.7537567461121e-28	7.16696216978111e-28	NA	NA	0.317	0.535	NA	0.100758	GO:0014033	neural crest cell differentiation	4/139	89/18866	0.00424729	0.231297	0.216107	KITLG/SMAD4/SEMA5B/JAG1	4
CA4	2	0	1	1	0	NA	0.16783275510024	0.234000336271415	NA	NA	1.89515582471896e-57	1.02842832057477e-35	NA	NA	0.271	0.339	NA	0.100458	GO:1903351	cellular response to dopamine	4/139	90/18866	0.00441984	0.231297	0.216107	GNAL/DTNBP1/KLF16/HTR3B	4
EPB41L4B	2	0	1	1	0	NA	0.160444943238484	0.236184751509079	NA	NA	5.38347033823647e-38	7.44809599789149e-21	NA	NA	0.329	0.528	NA	0.0991574	GO:1903350	response to dopamine	4/139	91/18866	0.00459706	0.231297	0.216107	GNAL/DTNBP1/KLF16/HTR3B	4
ARL4A	2	1	0	1	0	0.157724654241239	NA	0.234596508227186	NA	9.10518344738708e-17	NA	2.04871123143535e-22	NA	0.425	NA	0.441	NA	0.0980803	GO:0009214	cyclic nucleotide catabolic process	2/139	14/18866	0.0046279	0.231297	0.216107	PDE8B/PDE2A	2
THOC3	2	0	1	1	0	NA	0.155947312455587	0.214022561435732	NA	NA	2.1508444650303e-40	1.7574670208592e-22	NA	NA	0.318	0.427	NA	0.0924925	GO:0010752	regulation of cGMP-mediated signaling	2/139	14/18866	0.0046279	0.231297	0.216107	PDE2A/PTK2B	2
NHSL2	2	0	1	1	0	NA	0.164551783487026	0.204266073376027	NA	NA	6.2438521853886e-60	4.06464870375158e-25	NA	NA	0.237	0.364	NA	0.0922045	GO:0031058	positive regulation of histone modification	4/139	92/18866	0.004779	0.233873	0.218514	RIF1/SMAD4/AUTS2/CDK9	4
DGKA	2	0	1	1	0	NA	0.167795801024913	0.198528840763045	NA	NA	1.32775984804134e-43	1.08498671725871e-19	NA	NA	0.289	0.346	NA	0.0915812	GO:0031056	regulation of histone modification	5/139	149/18866	0.00495337	0.237458	0.221864	RIF1/SMAD4/AUTS2/FLCN/CDK9	5
TSPYL2	2	0	1	1	0	NA	0.226881198823793	0.138659526328563	NA	NA	1.55856223396739e-45	2.41745567749973e-07	NA	NA	0.878	0.864	NA	0.0913852	GO:0048712	negative regulation of astrocyte differentiation	2/139	15/18866	0.00531421	0.249662	0.233266	NTRK3/DAB1	2
ADGRB2	2	0	1	1	0	NA	0.187716998459591	0.170650990556185	NA	NA	4.3753054763047e-32	7.98464447297179e-07	NA	NA	0.819	0.818	NA	0.089592	GO:1904862	inhibitory synapse assembly	2/139	16/18866	0.0060442	0.263521	0.246216	FGF13/NLGN2	2
TMEM132B	2	0	1	1	0	NA	0.201166141370494	0.154839272649917	NA	NA	7.51960877065133e-41	9.95395815200812e-10	NA	NA	0.492	0.545	NA	0.0890014	GO:0048255	mRNA stabilization	3/139	51/18866	0.00629612	0.263521	0.246216	ANGEL2/MAPK14/VIP	3
MEIS2	2	0	1	0	1	NA	0.175616148601333	NA	0.175744546656211	NA	3.09702721447742e-56	NA	8.14488736890516e-29	NA	0.288	NA	0.34	0.0878402	GO:0050885	neuromuscular process controlling balance	3/139	51/18866	0.00629612	0.263521	0.246216	NLGN2/ABR/GRIN2C	3
KCTD4	2	0	1	1	0	NA	0.142364304922081	0.199493578606421	NA	NA	2.46016843173334e-42	8.93001834125068e-17	NA	NA	0.24	0.385	NA	0.0854645	GO:0008585	female gonad development	4/139	100/18866	0.0064113	0.263521	0.246216	VGF/KITLG/SMAD4/CEBPB	4
CA11	2	0	1	1	0	NA	0.176798195422353	0.162526183628095	NA	NA	1.67128982863303e-35	4.40413573840326e-10	NA	NA	0.886	0.93	NA	0.0848311	GO:0045639	positive regulation of myeloid cell differentiation	4/139	101/18866	0.00663824	0.263521	0.246216	JUN/KITLG/MAPK14/JAG1	4
IGFBP4	2	0	1	0	1	NA	0.192956001402283	NA	0.145988793438091	NA	1.22327596719188e-56	NA	1.46783073010452e-18	NA	0.35	NA	0.287	0.0847362	GO:0019932	second-messenger-mediated signaling	9/139	456/18866	0.00672183	0.263521	0.246216	NEUROD1/GNAL/PDE2A/PTK2B/ADGRB2/SLC8A2/CDH13/GRIN2C/VIP	9
PTMS	2	0	1	1	0	NA	0.187832920572042	0.150630865521577	NA	NA	7.16437120264926e-34	1.52690231618062e-08	NA	NA	0.927	0.976	NA	0.0846159	GO:1901890	positive regulation of cell junction assembly	4/139	103/18866	0.00710797	0.263521	0.246216	NTRK3/ADGRB2/NLGN2/NPHP4	4
CRIP2	2	0	1	1	0	NA	0.197879493179927	0.137074925035497	NA	NA	1.3090630010254e-40	2.31344882317173e-06	NA	NA	0.915	0.881	NA	0.0837386	GO:0007160	cell-matrix adhesion	6/139	230/18866	0.00720646	0.263521	0.246216	FBLN5/PTK2B/PLEKHA2/CDH13/ARHGAP6/JAG1	6
AC110491.1	2	0	1	1	0	NA	0.168478273381601	0.166446837249188	NA	NA	1.08014078165358e-45	1.65498316844287e-13	NA	NA	0.309	0.283	NA	0.0837313	GO:0046474	glycerophospholipid biosynthetic process	6/139	230/18866	0.00720646	0.263521	0.246216	DGKB/PLEKHA2/DGKA/ACSL3/MTMR7/CHKB	6
FAM153A	2	0	1	1	0	NA	0.188821213423935	0.144139915092576	NA	NA	1.62185034252353e-44	2.8031690082806e-11	NA	NA	0.308	0.322	NA	0.0832403	GO:0021549	cerebellum development	4/139	105/18866	0.00759915	0.263521	0.246216	NEUROD1/SEZ6/SSTR1/DAB1	4
SLC8A2	2	0	1	1	0	NA	0.170007365978709	0.156641677194553	NA	NA	6.83346093593342e-26	3.04993855945777e-09	NA	NA	0.639	0.832	NA	0.0816623	GO:0046545	development of primary female sexual characteristics	4/139	105/18866	0.00759915	0.263521	0.246216	VGF/KITLG/SMAD4/CEBPB	4
SLC9A7	2	0	1	1	0	NA	0.139568526136573	0.185046432784386	NA	NA	1.21779785147496e-27	3.35728024522595e-16	NA	NA	0.328	0.507	NA	0.0811537	GO:0035994	response to muscle stretch	2/139	18/18866	0.00763253	0.263521	0.246216	JUN/MAPK14	2
SSTR1	2	0	1	1	0	NA	0.172294791775619	0.151801244939232	NA	NA	9.59211039194831e-42	2.99335271272195e-11	NA	NA	0.305	0.367	NA	0.081024	GO:0051571	positive regulation of histone H3-K4 methylation	2/139	18/18866	0.00763253	0.263521	0.246216	SMAD4/AUTS2	2
CDC40	2	0	1	0	1	NA	0.216611869502309	NA	0.101780581279527	NA	7.73666235825538e-54	NA	1.48940672445933e-08	NA	0.396	NA	0.36	0.0795981	GO:0060080	inhibitory postsynaptic potential	2/139	18/18866	0.00763253	0.263521	0.246216	IGSF9B/NLGN2	2
PRAG1	2	0	1	1	0	NA	0.133199701521539	0.184789697409033	NA	NA	7.25057887735297e-42	1.75562319676804e-27	NA	NA	0.207	0.266	NA	0.0794973	GO:0097107	postsynaptic density assembly	2/139	18/18866	0.00763253	0.263521	0.246216	NTRK3/NLGN2	2
AMPD2	2	0	1	1	0	NA	0.184080760360621	0.132010544654292	NA	NA	9.91267537109119e-31	1.98588217358227e-07	NA	NA	0.663	0.643	NA	0.0790228	GO:0001954	positive regulation of cell-matrix adhesion	3/139	55/18866	0.00776436	0.263521	0.246216	PTK2B/PLEKHA2/CDH13	3
FGF13	2	1	1	0	0	0.104183095497949	0.206011150605962	NA	NA	7.64475877949662e-08	1.42297210383494e-42	NA	NA	0.422	0.517	NA	NA	0.0775486	GO:0035065	regulation of histone acetylation	3/139	55/18866	0.00776436	0.263521	0.246216	SMAD4/AUTS2/FLCN	3
KITLG	2	0	1	1	0	NA	0.175460627736525	0.134502820396017	NA	NA	5.88320132315748e-49	6.81113179627489e-12	NA	NA	0.332	0.297	NA	0.0774909	GO:0071868	cellular response to monoamine stimulus	4/139	106/18866	0.00785292	0.263521	0.246216	GNAL/DTNBP1/KLF16/HTR3B	4
MICAL3	2	0	1	1	0	NA	0.205068581836574	0.102180143765929	NA	NA	5.26339875398421e-46	3.20534065354851e-06	NA	NA	0.468	0.566	NA	0.0768122	GO:0071870	cellular response to catecholamine stimulus	4/139	106/18866	0.00785292	0.263521	0.246216	GNAL/DTNBP1/KLF16/HTR3B	4
CDC123	2	0	1	1	0	NA	0.135181255729368	0.17080966305721	NA	NA	2.39523764878248e-26	1.55598184106067e-12	NA	NA	0.371	0.528	NA	0.0764977	GO:1905269	positive regulation of chromatin organization	4/139	106/18866	0.00785292	0.263521	0.246216	RIF1/SMAD4/AUTS2/CDK9	4
RFX3	2	0	1	1	0	NA	0.105531037236159	0.199751628434239	NA	NA	6.42916508581334e-22	4.31702789144898e-17	NA	NA	0.242	0.399	NA	0.0763207	GO:0045444	fat cell differentiation	6/139	235/18866	0.00797098	0.263716	0.246397	ARL4A/CEBPB/TMEM120B/MAPK14/FLCN/JAG1	6
CCNG2	2	0	1	1	0	NA	0.191924062172737	0.109393114154673	NA	NA	4.84388597044256e-48	4.02661263042655e-05	NA	NA	0.412	0.381	NA	0.0753293	GO:0099175	regulation of postsynapse organization	4/139	107/18866	0.00811219	0.26466	0.24728	BAIAP2/NTRK3/DGKB/LRFN2	4
TMEM127	2	0	1	1	0	NA	0.16900276037979	0.12954336985852	NA	NA	1.12169254138627e-32	3.51185491255054e-08	NA	NA	0.41	0.517	NA	0.0746365	GO:2000251	positive regulation of actin cytoskeleton reorganization	2/139	19/18866	0.00848955	0.270653	0.252879	BAIAP2/NTRK3	2
KLF16	2	0	1	1	0	NA	0.129169292645083	0.164077989539008	NA	NA	2.84413025162999e-25	4.83183185017504e-11	NA	NA	0.327	0.514	NA	0.0733118	GO:0090630	activation of GTPase activity	4/139	109/18866	0.00864747	0.270653	0.252879	NTRK3/PTK2B/ABR/TBC1D1	4
TARBP1	2	0	1	1	0	NA	0.16377907739177	0.129126488345565	NA	NA	3.12621202794561e-39	2.15112321820759e-08	NA	NA	0.335	0.402	NA	0.0732264	GO:0071867	response to monoamine	4/139	110/18866	0.00892357	0.270653	0.252879	GNAL/DTNBP1/KLF16/HTR3B	4
DUSP14	2	0	1	1	0	NA	0.132931073598086	0.157546146637108	NA	NA	3.3668801002542e-34	1.93051946806428e-18	NA	NA	0.232	0.332	NA	0.0726193	GO:0071869	response to catecholamine	4/139	110/18866	0.00892357	0.270653	0.252879	GNAL/DTNBP1/KLF16/HTR3B	4
MIA3	2	0	1	1	0	NA	0.160651807977617	0.121211376980926	NA	NA	3.49643400040158e-31	7.85598245399872e-08	NA	NA	0.374	0.462	NA	0.0704658	GO:0043489	RNA stabilization	3/139	58/18866	0.00898721	0.270653	0.252879	ANGEL2/MAPK14/VIP	3
RIF1	2	0	1	1	0	NA	0.148209238054748	0.131146691052841	NA	NA	4.57214343492304e-34	3.73288941206837e-10	NA	NA	0.324	0.413	NA	0.069839	GO:1902373	negative regulation of mRNA catabolic process	3/139	58/18866	0.00898721	0.270653	0.252879	ANGEL2/MAPK14/VIP	3
INTS3	2	0	1	1	0	NA	0.136782147946186	0.142263118656932	NA	NA	3.0976074080819e-24	4.59056794469384e-09	NA	NA	0.396	0.521	NA	0.0697613	GO:0099173	postsynapse organization	5/139	173/18866	0.00917956	0.272947	0.255022	BAIAP2/NTRK3/DGKB/NLGN2/LRFN2	5
RIN1	2	0	1	1	0	NA	0.109085845766949	0.168754974453938	NA	NA	8.40861908734937e-30	3.23324475529749e-18	NA	NA	0.193	0.322	NA	0.0694602	GO:0032495	response to muramyl dipeptide	2/139	20/18866	0.00938761	0.275644	0.257542	MAPK14/JAG1	2
SMAD4	2	0	1	1	0	NA	0.160191237353984	0.116968349049325	NA	NA	1.25590605506374e-36	1.84914777525931e-07	NA	NA	0.376	0.472	NA	0.0692899	GO:0006406	mRNA export from nucleus	4/139	113/18866	0.00978622	0.278804	0.260494	THOC3/CDC40/AGFG1/NXF1	4
CDH13	2	1	0	0	1	0.119294610208979	NA	NA	0.157313129993798	1.32374541404031e-12	NA	NA	9.34738801228207e-15	0.368	NA	NA	0.519	0.0691519	GO:0071427	mRNA-containing ribonucleoprotein complex export from nucleus	4/139	113/18866	0.00978622	0.278804	0.260494	THOC3/CDC40/AGFG1/NXF1	4
TMEM167B	2	0	1	1	0	NA	0.131870983696611	0.144592500268416	NA	NA	2.30164217510286e-23	1.30118665995429e-09	NA	NA	0.409	0.584	NA	0.0691159	GO:0022037	metencephalon development	4/139	114/18866	0.0100854	0.278804	0.260494	NEUROD1/SEZ6/SSTR1/DAB1	4
ACSL3	2	0	1	1	0	NA	0.137608367077204	0.138849394783315	NA	NA	1.32726939996149e-17	6.41509268130265e-06	NA	NA	0.763	0.706	NA	0.0691144	GO:0003170	heart valve development	3/139	61/18866	0.0103166	0.278804	0.260494	PDE2A/SMAD4/JAG1	3
RGS12	2	1	0	0	1	0.142237464202731	NA	NA	0.133326417713592	5.72604232285862e-12	NA	NA	1.14639060911884e-15	0.436	NA	NA	0.444	0.068891	GO:2000756	regulation of peptidyl-lysine acetylation	3/139	61/18866	0.0103166	0.278804	0.260494	SMAD4/AUTS2/FLCN	3
GALNT18	2	0	1	1	0	NA	0.1603776108792	0.113647074990486	NA	NA	1.01500724299225e-40	4.2203617236426e-09	NA	NA	0.304	0.283	NA	0.0685062	GO:0001502	cartilage condensation	2/139	21/18866	0.0103261	0.278804	0.260494	MGP/MAPK14	2
IGSF9B	2	0	1	1	0	NA	0.121144334832935	0.152049204884233	NA	NA	1.43730418633319e-25	1.56458521520591e-11	NA	NA	0.263	0.364	NA	0.0682984	GO:0098698	postsynaptic specialization assembly	2/139	21/18866	0.0103261	0.278804	0.260494	NTRK3/NLGN2	2
LENG8	2	1	1	0	0	0.11950701592242	0.152687851418088	NA	NA	6.78556497358274e-11	3.3374752351114e-32	NA	NA	0.474	0.417	NA	NA	0.0680487	GO:2001252	positive regulation of chromosome organization	5/139	182/18866	0.0112613	0.3006	0.280859	RIF1/SMAD4/AUTS2/TNKS2/CDK9	5
TDRD9	2	0	1	1	0	NA	0.167086161787868	0.103956521763545	NA	NA	2.75302373872555e-54	1.25889910080592e-09	NA	NA	0.258	0.203	NA	0.0677607	GO:1903706	regulation of hemopoiesis	9/139	498/18866	0.011565	0.303411	0.283486	PTK2B/JUN/MEIS2/KITLG/CEBPB/PURB/MAPK14/FLCN/JAG1	9
CEBPB	2	0	0	1	1	NA	NA	0.133160345000786	0.137068091847577	NA	NA	1.29876845860635e-06	4.4558799122077e-09	NA	NA	0.524	0.687	0.0675571	GO:0046660	female sex differentiation	4/139	119/18866	0.0116701	0.303411	0.283486	VGF/KITLG/SMAD4/CEBPB	4
SOBP	2	0	1	1	0	NA	0.165661936778561	0.103841292434895	NA	NA	3.57148379823153e-33	4.11279112778159e-06	NA	NA	0.384	0.503	NA	0.0673758	GO:1900449	regulation of glutamate receptor signaling pathway	3/139	64/18866	0.0117541	0.303411	0.283486	FRRS1L/PTK2B/NLGN2	3
LIME1	2	0	1	0	1	NA	0.165086041830185	NA	0.102936119844574	NA	1.07937417872467e-51	NA	4.15230162982553e-12	NA	0.275	NA	0.261	0.0670055	GO:0031281	positive regulation of cyclase activity	2/139	23/18866	0.0123216	0.308524	0.288262	AKAP5/MAPK14	2
TUBGCP4	2	0	1	1	0	NA	0.121691946826065	0.14458623710688	NA	NA	2.23666388142791e-25	1.33608990948159e-14	NA	NA	0.236	0.28	NA	0.0665695	GO:0070935	3'-UTR-mediated mRNA stabilization	2/139	23/18866	0.0123216	0.308524	0.288262	ANGEL2/MAPK14	2
TSPYL4	2	1	1	0	0	0.106872893975123	0.159242747052903	NA	NA	6.66894146556435e-06	3.67565977947876e-20	NA	NA	0.748	0.754	NA	NA	0.0665289	GO:0002065	columnar/cuboidal epithelial cell differentiation	4/139	121/18866	0.0123462	0.308524	0.288262	NEUROD1/RFX3/CEBPB/JAG1	4
NLGN2	2	0	1	1	0	NA	0.137309522628926	0.128431062420468	NA	NA	1.49824546988628e-25	4.40412547666147e-06	NA	NA	0.532	0.654	NA	0.0664351	GO:0007173	epidermal growth factor receptor signaling pathway	4/139	123/18866	0.013047	0.310258	0.289883	PTK2B/CDH13/BRAF/RNF115	4
MAN2C1	2	0	1	0	1	NA	0.157651575569962	NA	0.107706403684092	NA	7.50895916170074e-37	NA	1.03384967361824e-08	NA	0.393	NA	0.455	0.0663395	GO:0031060	regulation of histone methylation	3/139	67/18866	0.0133013	0.310258	0.289883	RIF1/SMAD4/AUTS2	3
ANGEL2	2	0	1	1	0	NA	0.159677842605574	0.104770413602075	NA	NA	1.94697106577198e-41	1.10508989377933e-06	NA	NA	0.299	0.364	NA	0.0661121	GO:0051965	positive regulation of synapse assembly	3/139	67/18866	0.0133013	0.310258	0.289883	NTRK3/ADGRB2/NLGN2	3
AUTS2	2	0	0	1	1	NA	NA	0.132357654314957	0.131233576008636	NA	NA	3.13491328276283e-08	2.54818633588015e-14	NA	NA	0.42	0.38	0.0658978	GO:0030308	negative regulation of cell growth	5/139	190/18866	0.0133641	0.310258	0.289883	TSPYL2/FGF13/SMAD4/SEMA5B/FLCN	5
LSM3	2	0	1	1	0	NA	0.140171878815652	0.122386465247753	NA	NA	5.56889608900289e-28	1.29801408944194e-07	NA	NA	0.471	0.552	NA	0.0656396	GO:0007187	G protein-coupled receptor signaling pathway, coupled to cyclic nucleotide second messenger	6/139	263/18866	0.0133646	0.310258	0.289883	AKAP5/GNAL/PDE2A/ADGRB2/SSTR1/VIP	6
ABR	2	0	1	1	0	NA	0.151504615417692	0.109774268563714	NA	NA	4.73456707189884e-28	2.94845288606985e-05	NA	NA	0.896	0.937	NA	0.0653197	GO:0090335	regulation of brown fat cell differentiation	2/139	24/18866	0.0133775	0.310258	0.289883	MAPK14/FLCN	2
FAM133B	2	1	1	0	0	0.111170406028693	0.149930363376089	NA	NA	1.8259080445236e-10	2.54909473849703e-31	NA	NA	0.383	0.34	NA	NA	0.0652752	GO:0098743	cell aggregation	2/139	24/18866	0.0133775	0.310258	0.289883	MGP/MAPK14	2
BRAF	2	0	1	1	0	NA	0.148499184407944	0.112583073462675	NA	NA	5.88802192781699e-31	1.05461956070993e-06	NA	NA	0.35	0.402	NA	0.0652706	GO:0010721	negative regulation of cell development	7/139	343/18866	0.013695	0.310258	0.289883	NTRK3/PRAG1/FGF13/SMAD4/SEMA5B/JAG1/DAB1	7
CDC37L1	2	0	1	1	0	NA	0.141449600993681	0.119367991860229	NA	NA	3.78701690710544e-28	8.416509978119e-08	NA	NA	0.315	0.388	NA	0.0652044	GO:1902369	negative regulation of RNA catabolic process	3/139	68/18866	0.0138415	0.310258	0.289883	ANGEL2/MAPK14/VIP	3
UBALD1	2	0	1	1	0	NA	0.149579727076931	0.108762276308209	NA	NA	1.1192694109511e-27	2.41959057271532e-06	NA	NA	0.354	0.493	NA	0.0645855	GO:0046339	diacylglycerol metabolic process	2/139	25/18866	0.0144712	0.310258	0.289883	DGKB/DGKA	2
PURB	2	0	1	1	0	NA	0.149567156198785	0.108094620712403	NA	NA	2.5049954518191e-30	8.04086842895643e-06	NA	NA	0.419	0.476	NA	0.0644154	GO:0050927	positive regulation of positive chemotaxis	2/139	25/18866	0.0144712	0.310258	0.289883	NTRK3/CDH13	2
CELF1	2	0	1	1	0	NA	0.138428690833997	0.118612397782561	NA	NA	1.85829052580152e-19	2.94673967333908e-05	NA	NA	0.597	0.678	NA	0.0642603	GO:0046578	regulation of Ras protein signal transduction	5/139	194/18866	0.0145088	0.310258	0.289883	PSD/PRAG1/KITLG/AUTS2/FLCN	5
RNF115	2	0	1	1	0	NA	0.153379779900449	0.102954350308364	NA	NA	5.40392125719379e-32	4.99333998068374e-07	NA	NA	0.376	0.441	NA	0.0640835	GO:0030099	myeloid cell differentiation	8/139	431/18866	0.0146253	0.310258	0.289883	PTK2B/JUN/MEIS2/KITLG/CEBPB/PURB/MAPK14/JAG1	8
TMEM120B	2	0	1	1	0	NA	0.136888589666119	0.118913764063248	NA	NA	2.4813892524506e-42	9.66436678121569e-10	NA	NA	0.258	0.283	NA	0.0639506	GO:1902275	regulation of chromatin organization	5/139	195/18866	0.0148049	0.310258	0.289883	RIF1/SMAD4/AUTS2/FLCN/CDK9	5
NOXA1	2	0	1	1	0	NA	0.139492865941695	0.112544078239585	NA	NA	1.85631527462221e-30	7.3364731780205e-07	NA	NA	0.296	0.336	NA	0.0630092	GO:0050771	negative regulation of axonogenesis	3/139	70/18866	0.0149592	0.310258	0.289883	FGF13/SEMA5B/DAB1	3
GRIN2C	2	0	0	1	1	NA	NA	0.149326738486553	0.102430559530264	NA	NA	5.47831142705002e-08	1.23831360177771e-09	NA	NA	0.402	0.331	0.0629393	GO:0045017	glycerolipid biosynthetic process	6/139	270/18866	0.0150359	0.310258	0.289883	DGKB/PLEKHA2/DGKA/ACSL3/MTMR7/CHKB	6
AC245060.5	2	1	0	0	1	0.144579739748089	NA	NA	0.106663849813326	6.63608537407267e-19	NA	NA	8.71905234355823e-17	0.322	NA	NA	0.185	0.0628109	GO:0034329	cell junction assembly	8/139	434/18866	0.0151886	0.310258	0.289883	NTRK3/PTK2B/ADGRB2/FGF13/NLGN2/ARHGAP6/FLCN/NPHP4	8
MED31	2	0	1	1	0	NA	0.10073720151984	0.15034676417696	NA	NA	4.69323213453757e-19	1.00852941974822e-12	NA	NA	0.249	0.367	NA	0.062771	GO:0008654	phospholipid biosynthetic process	6/139	271/18866	0.015286	0.310258	0.289883	DGKB/PLEKHA2/DGKA/ACSL3/MTMR7/CHKB	6
TBC1D1	2	0	1	1	0	NA	0.106917617451305	0.144113640815395	NA	NA	4.94674852421301e-21	2.53823678681696e-09	NA	NA	0.262	0.35	NA	0.0627578	GO:0048839	inner ear development	5/139	197/18866	0.0154093	0.310258	0.289883	NEUROD1/NTRK3/SOBP/ABR/JAG1	5
KIAA1324	2	0	1	1	0	NA	0.11430686960014	0.136401542474902	NA	NA	5.27336246103436e-27	7.2981189117452e-09	NA	NA	0.236	0.311	NA	0.0626771	GO:0046579	positive regulation of Ras protein signal transduction	3/139	71/18866	0.0155366	0.310258	0.289883	PRAG1/KITLG/AUTS2	3
ABCA5	2	0	1	1	0	NA	0.110940280869415	0.138638363101401	NA	NA	2.86742058698323e-23	2.69574053470118e-12	NA	NA	0.252	0.353	NA	0.0623947	GO:0035235	ionotropic glutamate receptor signaling pathway	2/139	26/18866	0.0156023	0.310258	0.289883	PTK2B/GRIN2C	2
CHID1	2	0	1	1	0	NA	0.118754991065983	0.130496671307468	NA	NA	5.84768618113187e-22	5.08231844592145e-08	NA	NA	0.383	0.535	NA	0.0623129	GO:0050926	regulation of positive chemotaxis	2/139	26/18866	0.0156023	0.310258	0.289883	NTRK3/CDH13	2
SEMA5B	2	0	1	0	1	NA	0.13912131123409	NA	0.107674681799506	NA	4.09637002443821e-41	NA	5.1467891329364e-11	NA	0.224	NA	0.265	0.061699	GO:1904861	excitatory synapse assembly	2/139	26/18866	0.0156023	0.310258	0.289883	NTRK3/NLGN2	2
ZCCHC14	2	0	1	1	0	NA	0.113122856389467	0.131814279011579	NA	NA	3.43052925582087e-20	1.8133559285978e-10	NA	NA	0.252	0.399	NA	0.0612343	GO:0071426	ribonucleoprotein complex export from nucleus	4/139	130/18866	0.0156976	0.310258	0.289883	THOC3/CDC40/AGFG1/NXF1	4
MTMR7	2	0	1	1	0	NA	0.135366446040276	0.108805928227809	NA	NA	2.17238182305091e-33	6.34668895617205e-07	NA	NA	0.26	0.339	NA	0.0610431	GO:0007626	locomotory behavior	5/139	198/18866	0.0157176	0.310258	0.289883	SEZ6/PAK6/SOBP/NLGN2/DAB1	5
AGFG1	2	0	1	1	0	NA	0.140645095721006	0.103470792305298	NA	NA	1.0697742506723e-28	9.07282342701041e-06	NA	NA	0.368	0.486	NA	0.061029	GO:0071166	ribonucleoprotein complex localization	4/139	131/18866	0.0161018	0.314738	0.294068	THOC3/CDC40/AGFG1/NXF1	4
CHKB	2	0	1	1	0	NA	0.136652382897075	0.105443466956546	NA	NA	4.37494326110834e-25	2.69638636958863e-08	NA	NA	0.272	0.43	NA	0.060524	GO:0031032	actomyosin structure organization	5/139	200/18866	0.0163465	0.314738	0.294068	PTK2B/EPB41L4B/SMAD4/TNNT1/ARHGAP6	5
SCRN1	2	0	1	1	0	NA	0.108940322428387	0.132902202162641	NA	NA	3.52349284872719e-15	6.50704508131823e-06	NA	NA	0.837	0.899	NA	0.0604606	GO:1901888	regulation of cell junction assembly	5/139	200/18866	0.0163465	0.314738	0.294068	NTRK3/ADGRB2/NLGN2/ARHGAP6/NPHP4	5
TNNT1	2	1	1	0	0	0.103999877736354	0.137497026677858	NA	NA	2.95703059499194e-08	4.86386696871308e-32	NA	NA	0.471	0.286	NA	NA	0.0603742	GO:0018195	peptidyl-arginine modification	2/139	27/18866	0.01677	0.317683	0.29682	ART3/PRMT8	2
ATP2B1-AS1	2	0	1	1	0	NA	0.132037766811334	0.108939758283162	NA	NA	5.44513920371249e-42	1.15646085911918e-08	NA	NA	0.209	0.252	NA	0.0602444	GO:0046426	negative regulation of receptor signaling pathway via JAK-STAT	2/139	27/18866	0.01677	0.317683	0.29682	NEUROD1/DAB1	2
HTR3B	2	0	1	1	0	NA	0.114212867018782	0.124707765731652	NA	NA	1.09155693725515e-32	1.62033477917388e-19	NA	NA	0.193	0.171	NA	0.0597302	GO:0045165	cell fate commitment	6/139	278/18866	0.017118	0.321681	0.300555	NEUROD1/NTRK3/FGF13/SMAD4/CEBPB/JAG1	6
FBXL16	2	0	1	0	1	NA	0.123186273057213	NA	0.115138588921271	NA	2.58138282899448e-23	NA	1.74780439105334e-11	NA	0.97	NA	0.987	0.0595812	GO:1901983	regulation of protein acetylation	3/139	75/18866	0.0179708	0.32729	0.305797	SMAD4/AUTS2/FLCN	3
TNKS2	2	0	1	1	0	NA	0.135243996052655	0.100681480047226	NA	NA	2.50472684818354e-27	0.000145430441177136	NA	NA	0.371	0.483	NA	0.0589814	GO:0007205	protein kinase C-activating G protein-coupled receptor signaling pathway	2/139	28/18866	0.0179738	0.32729	0.305797	DGKB/DGKA	2
MAPK14	2	0	1	1	0	NA	0.133490002124145	0.10006255248795	NA	NA	1.3161837939966e-26	9.62600111299906e-06	NA	NA	0.305	0.381	NA	0.0583881	GO:0035883	enteroendocrine cell differentiation	2/139	28/18866	0.0179738	0.32729	0.305797	NEUROD1/RFX3	2
FGD1	2	0	1	1	0	NA	0.103024637642495	0.129825901741962	NA	NA	8.51076024978414e-24	5.45701608750329e-10	NA	NA	0.17	0.248	NA	0.0582126	GO:0045686	negative regulation of glial cell differentiation	2/139	28/18866	0.0179738	0.32729	0.305797	NTRK3/DAB1	2
TMEM161B-AS1	2	0	1	1	0	NA	0.127625432882326	0.104246334836143	NA	NA	8.0814940241626e-21	2.68965616881004e-06	NA	NA	0.347	0.423	NA	0.0579679	GO:0043687	post-translational protein modification	7/139	363/18866	0.018129	0.327576	0.306064	WFS1/RCN1/VGF/IGFBP4/MIA3/FBXL16/FLCN	7
UPK3BL1	2	0	1	1	0	NA	0.121781283012054	0.108299214553829	NA	NA	3.93234309872193e-28	7.16745397364018e-07	NA	NA	0.249	0.462	NA	0.0575201	GO:0051569	regulation of histone H3-K4 methylation	2/139	29/18866	0.0192131	0.333377	0.311483	SMAD4/AUTS2	2
EGR4	2	0	1	1	0	NA	0.103524566693353	0.125340677145184	NA	NA	9.70696441158263e-38	1.94143657251342e-14	NA	NA	0.15	0.147	NA	0.0572163	GO:0009612	response to mechanical stimulus	5/139	209/18866	0.019384	0.333377	0.311483	PDE2A/PTK2B/JUN/MEIS2/MAPK14	5
EHBP1L1	2	0	1	1	0	NA	0.121876209613521	0.106187637530071	NA	NA	4.70237935083623e-22	2.84135687042783e-07	NA	NA	0.321	0.374	NA	0.057016	GO:0051057	positive regulation of small GTPase mediated signal transduction	3/139	78/18866	0.0199279	0.333377	0.311483	PRAG1/KITLG/AUTS2	3
PRMT8	2	0	1	1	0	NA	0.109031483932692	0.118905241849905	NA	NA	2.94121783659568e-22	1.35242273290765e-08	NA	NA	0.229	0.241	NA	0.0569842	GO:0007266	Rho protein signal transduction	4/139	140/18866	0.0200357	0.333377	0.311483	PRAG1/CDH13/ARHGAP6/FLCN	4
ARHGAP6	2	0	0	1	1	NA	NA	0.124413813567559	0.102506318433809	NA	NA	1.93088767066797e-08	3.43499097781743e-14	NA	NA	0.269	0.19	0.05673	GO:0097553	calcium ion transmembrane import into cytosol	4/139	140/18866	0.0200357	0.333377	0.311483	PTK2B/SLC8A2/LIME1/GRIN2C	4
UTP4	2	0	1	1	0	NA	0.105950840686592	0.120795086126375	NA	NA	2.61965532326365e-21	1.58367175099662e-09	NA	NA	0.25	0.308	NA	0.0566865	GO:0002685	regulation of leukocyte migration	5/139	212/18866	0.0204735	0.333377	0.311483	PTK2B/KITLG/MIA3/ABR/MAPK14	5
LRFN2	2	0	1	1	0	NA	0.100206642459632	0.12521200417508	NA	NA	3.73228822365307e-25	2.38102673321502e-10	NA	NA	0.17	0.255	NA	0.0563547	GO:0030278	regulation of ossification	5/139	212/18866	0.0204735	0.333377	0.311483	PTK2B/MGP/CEBPB/MAPK14/JAG1	5
DDX51	2	0	1	1	0	NA	0.114984723872085	0.1089585066562	NA	NA	5.18260368420092e-27	9.20724500375638e-09	NA	NA	0.255	0.36	NA	0.0559858	GO:0010758	regulation of macrophage chemotaxis	2/139	30/18866	0.0204874	0.333377	0.311483	PTK2B/MAPK14	2
FNDC3A	2	0	1	1	0	NA	0.111590360005711	0.111788849532462	NA	NA	1.3203254754464e-20	1.555302592797e-07	NA	NA	0.318	0.423	NA	0.0558448	GO:0019934	cGMP-mediated signaling	2/139	30/18866	0.0204874	0.333377	0.311483	PDE2A/PTK2B	2
FLCN	2	1	1	0	0	0.103571128092073	0.116913683188305	NA	NA	1.01758105632156e-07	9.68328492950308e-24	NA	NA	0.39	0.308	NA	NA	0.0551212	GO:0030511	positive regulation of transforming growth factor beta receptor signaling pathway	2/139	30/18866	0.0204874	0.333377	0.311483	SMAD4/FLCN	2
VIP	2	0	1	0	1	NA	0.113834433960708	NA	0.10617058148423	NA	1.08855535110771e-26	NA	9.27740884160094e-16	NA	0.2	NA	0.192	0.0550013	GO:0035066	positive regulation of histone acetylation	2/139	30/18866	0.0204874	0.333377	0.311483	SMAD4/AUTS2	2
MAPK4	2	0	1	1	0	NA	0.118028380998567	0.100810216074181	NA	NA	4.01886550715284e-26	8.19134577011416e-05	NA	NA	0.373	0.416	NA	0.0547096	GO:1903846	positive regulation of cellular response to transforming growth factor beta stimulus	2/139	30/18866	0.0204874	0.333377	0.311483	SMAD4/FLCN	2
CDK9	2	0	1	1	0	NA	0.109602592904923	0.107849624861275	NA	NA	6.18001985344662e-23	1.18643007930541e-05	NA	NA	0.26	0.353	NA	0.0543631	GO:0070373	negative regulation of ERK1 and ERK2 cascade	3/139	79/18866	0.0206054	0.333377	0.311483	CAMK2N1/SMAD4/FLCN	3
KIAA1522	2	0	1	1	0	NA	0.103022223859796	0.114360671094364	NA	NA	1.28052795162152e-21	3.6158601530822e-08	NA	NA	0.247	0.294	NA	0.0543457	GO:0002687	positive regulation of leukocyte migration	4/139	142/18866	0.0209834	0.333377	0.311483	PTK2B/KITLG/MIA3/MAPK14	4
MLXIP	2	0	1	1	0	NA	0.108882272331136	0.106197722129778	NA	NA	3.05384373691241e-23	1.40969939743002e-07	NA	NA	0.233	0.287	NA	0.05377	GO:0003151	outflow tract morphogenesis	3/139	80/18866	0.0212954	0.333377	0.311483	JUN/SMAD4/JAG1	3
DEGS1	2	0	1	1	0	NA	0.111649317019056	0.102284150831627	NA	NA	1.54761399183558e-16	1.61487947064499e-06	NA	NA	0.373	0.549	NA	0.0534834	GO:0014032	neural crest cell development	3/139	80/18866	0.0212954	0.333377	0.311483	KITLG/SEMA5B/JAG1	3
DIDO1	2	0	1	1	0	NA	0.103700940753751	0.109297707035103	NA	NA	1.17841466847405e-21	5.78682517815573e-08	NA	NA	0.263	0.367	NA	0.0532497	GO:0016571	histone methylation	4/139	143/18866	0.0214674	0.333377	0.311483	RIF1/SMAD4/AUTS2/PRMT8	4
KIF22	2	0	1	1	0	NA	0.103374484842877	0.108510553579464	NA	NA	4.96336536470822e-20	2.89459818822275e-06	NA	NA	0.282	0.399	NA	0.0529713	GO:0045598	regulation of fat cell differentiation	4/139	143/18866	0.0214674	0.333377	0.311483	CEBPB/MAPK14/FLCN/JAG1	4
JAG1	2	0	1	1	0	NA	0.100051621263154	0.110254963190427	NA	NA	6.1177506777524e-22	8.92787688221312e-11	NA	NA	0.207	0.206	NA	0.0525766	GO:0009154	purine ribonucleotide catabolic process	2/139	31/18866	0.021796	0.333377	0.311483	PDE8B/PDE2A	2
DAB1	2	0	1	1	0	NA	0.103395068730582	0.104582248601078	NA	NA	4.29883456069278e-28	7.02280862220315e-09	NA	NA	0.184	0.224	NA	0.0519943	GO:0031338	regulation of vesicle fusion	2/139	31/18866	0.021796	0.333377	0.311483	CPLX2/STXBP6	2
LRWD1	2	0	1	1	0	NA	0.101402099864406	0.106487562551064	NA	NA	3.49550724171785e-26	7.16540811551929e-08	NA	NA	0.203	0.262	NA	0.0519724	GO:0048710	regulation of astrocyte differentiation	2/139	31/18866	0.021796	0.333377	0.311483	NTRK3/DAB1	2
NXF1	2	0	1	1	0	NA	0.100591732677436	0.106939245281267	NA	NA	1.55926266897547e-17	5.03275605374485e-08	NA	NA	0.258	0.402	NA	0.0518827	GO:0099068	postsynapse assembly	2/139	31/18866	0.021796	0.333377	0.311483	NTRK3/NLGN2	2
NPHP4	2	0	1	1	0	NA	0.102684157595589	0.103262367339263	NA	NA	1.13692759630786e-23	6.28534120550601e-08	NA	NA	0.207	0.224	NA	0.0514866	GO:0006405	RNA export from nucleus	4/139	144/18866	0.0219582	0.333377	0.311483	THOC3/CDC40/AGFG1/NXF1	4
MTX3	2	0	1	1	0	NA	0.102764458682444	0.10301711352161	NA	NA	2.56291783745605e-20	1.11420693980903e-06	NA	NA	0.223	0.283	NA	0.0514454	GO:0050921	positive regulation of chemotaxis	4/139	144/18866	0.0219582	0.333377	0.311483	NTRK3/PTK2B/CDH13/MAPK14	4
CCNO	2	0	1	1	0	NA	0.104474607882181	0.101029696533462	NA	NA	2.86331502167691e-30	2.36896301643085e-12	NA	NA	0.181	0.15	NA	0.0513761	GO:0021766	hippocampus development	3/139	81/18866	0.021998	0.333377	0.311483	NEUROD1/FGF13/DAB1	3
DCBLD1	2	0	1	1	0	NA	0.103817153694902	0.100941479337428	NA	NA	4.66761852584272e-28	6.2499603967264e-08	NA	NA	0.183	0.231	NA	0.0511897	GO:0050768	negative regulation of neurogenesis	6/139	295/18866	0.0221854	0.333852	0.311928	NTRK3/PRAG1/FGF13/SEMA5B/JAG1/DAB1	6
LAMP5	1	0	1	0	0	NA	0.653080053776959	NA	NA	NA	4.29381672423002e-203	NA	NA	NA	0.927	NA	NA	0.16327	GO:0010810	regulation of cell-substrate adhesion	5/139	217/18866	0.0223772	0.333852	0.311928	PTK2B/PLEKHA2/CDH13/ARHGAP6/JAG1	5
KCNIP2	1	0	1	0	0	NA	0.538088974807665	NA	NA	NA	1.68684826192786e-196	NA	NA	NA	0.758	NA	NA	0.134522	GO:0038127	ERBB signaling pathway	4/139	145/18866	0.0224558	0.333852	0.311928	PTK2B/CDH13/BRAF/RNF115	4
ITPKA	1	0	1	0	0	NA	0.403493251780096	NA	NA	NA	2.99954540241062e-99	NA	NA	NA	0.796	NA	NA	0.100873	GO:0009261	ribonucleotide catabolic process	2/139	32/18866	0.0231384	0.335506	0.313473	PDE8B/PDE2A	2
TESPA1	1	0	0	1	0	NA	NA	0.399213994941946	NA	NA	NA	2.263703500672e-47	NA	NA	NA	0.643	NA	0.0998035	GO:0051968	positive regulation of synaptic transmission, glutamatergic	2/139	32/18866	0.0231384	0.335506	0.313473	PTK2B/NLGN2	2
MET	1	0	0	1	0	NA	NA	0.329203123274534	NA	NA	NA	2.12521026600861e-54	NA	NA	NA	0.476	NA	0.0823008	GO:0060317	cardiac epithelial to mesenchymal transition	2/139	32/18866	0.0231384	0.335506	0.313473	SMAD4/JAG1	2
WNT3	1	0	1	0	0	NA	0.311737142154415	NA	NA	NA	1.27428040908093e-106	NA	NA	NA	0.449	NA	NA	0.0779343	GO:0097106	postsynaptic density organization	2/139	32/18866	0.0231384	0.335506	0.313473	NTRK3/NLGN2	2
NPTX2	1	0	0	1	0	NA	NA	0.306444739348781	NA	NA	NA	5.03124751607886e-32	NA	NA	NA	0.451	NA	0.0766112	GO:0014031	mesenchymal cell development	3/139	84/18866	0.0241813	0.336848	0.314727	KITLG/SEMA5B/JAG1	3
NPTXR	1	0	1	0	0	NA	0.304355736398127	NA	NA	NA	9.01961674532531e-70	NA	NA	NA	0.968	NA	NA	0.0760889	GO:0048864	stem cell development	3/139	84/18866	0.0241813	0.336848	0.314727	KITLG/SEMA5B/JAG1	3
PCNT	1	0	1	0	0	NA	0.303003009670457	NA	NA	NA	5.70313154903875e-91	NA	NA	NA	0.527	NA	NA	0.0757508	GO:0007162	negative regulation of cell adhesion	6/139	301/18866	0.0241925	0.336848	0.314727	MIA3/CDH13/CEBPB/ARHGAP6/JAG1/DAB1	6
SYNPO	1	0	0	1	0	NA	NA	0.284870736849186	NA	NA	NA	9.85714253427081e-22	NA	NA	NA	0.888	NA	0.0712177	GO:0019722	calcium-mediated signaling	5/139	222/18866	0.0243925	0.336848	0.314727	PTK2B/ADGRB2/SLC8A2/CDH13/GRIN2C	5
PLPPR4	1	0	0	1	0	NA	NA	0.276212899920474	NA	NA	NA	9.99428928116632e-18	NA	NA	NA	0.773	NA	0.0690532	GO:0045920	negative regulation of exocytosis	2/139	33/18866	0.024514	0.336848	0.314727	STXBP6/ABR	2
ZFR	1	0	0	1	0	NA	NA	0.262978434729447	NA	NA	NA	4.1257137854976e-19	NA	NA	NA	0.874	NA	0.0657446	GO:1904893	negative regulation of receptor signaling pathway via STAT	2/139	33/18866	0.024514	0.336848	0.314727	NEUROD1/DAB1	2
SLC17A6	1	0	0	1	0	NA	NA	0.250970157223265	NA	NA	NA	3.46973955540064e-35	NA	NA	NA	0.364	NA	0.0627425	GO:2000758	positive regulation of peptidyl-lysine acetylation	2/139	33/18866	0.024514	0.336848	0.314727	SMAD4/AUTS2	2
CAMK2A	1	0	0	1	0	NA	NA	0.247691114663403	NA	NA	NA	2.45968044969089e-17	NA	NA	NA	0.937	NA	0.0619228	GO:0043524	negative regulation of neuron apoptotic process	4/139	149/18866	0.024515	0.336848	0.314727	WFS1/PTK2B/JUN/CEBPB	4
CHRD	1	0	1	0	0	NA	0.237809155792531	NA	NA	NA	1.99550672077854e-60	NA	NA	NA	0.476	NA	NA	0.0594523	GO:0008406	gonad development	5/139	223/18866	0.0248092	0.336848	0.314727	VGF/KITLG/SMAD4/CEBPB/FNDC3A	5
CYP46A1	1	0	0	1	0	NA	NA	0.233267647320547	NA	NA	NA	4.68339308506459e-15	NA	NA	NA	0.818	NA	0.0583169	GO:0035418	protein localization to synapse	3/139	85/18866	0.0249341	0.336848	0.314727	BAIAP2/NLGN2/GRIN2C	3
BTBD3	1	0	0	1	0	NA	NA	0.229153058716653	NA	NA	NA	1.04424565264527e-14	NA	NA	NA	0.783	NA	0.0572883	GO:0019935	cyclic-nucleotide-mediated signaling	5/139	224/18866	0.0252304	0.336848	0.314727	GNAL/PDE2A/PTK2B/ADGRB2/VIP	5
TMEM47	1	0	0	1	0	NA	NA	0.228210160334711	NA	NA	NA	1.99204572912945e-14	NA	NA	NA	0.713	NA	0.0570525	GO:0043583	ear development	5/139	224/18866	0.0252304	0.336848	0.314727	NEUROD1/NTRK3/SOBP/ABR/JAG1	5
PSD3	1	0	0	1	0	NA	NA	0.223894493405721	NA	NA	NA	7.49037033820598e-14	NA	NA	NA	0.958	NA	0.0559736	GO:0045665	negative regulation of neuron differentiation	5/139	225/18866	0.0256561	0.336848	0.314727	PRAG1/FGF13/SEMA5B/JAG1/DAB1	5
HOMER1	1	0	0	1	0	NA	NA	0.218506357545903	NA	NA	NA	2.46219457920424e-20	NA	NA	NA	0.545	NA	0.0546266	GO:0007193	adenylate cyclase-inhibiting G protein-coupled receptor signaling pathway	3/139	86/18866	0.0256996	0.336848	0.314727	AKAP5/GNAL/PDE2A	3
ZBTB18	1	0	0	1	0	NA	NA	0.215994791807967	NA	NA	NA	3.85144323336995e-11	NA	NA	NA	0.818	NA	0.0539987	GO:0055094	response to lipoprotein particle	2/139	34/18866	0.0259223	0.336848	0.314727	MIA3/CDH13	2
RUNDC3A	1	0	0	1	0	NA	NA	0.215435985696997	NA	NA	NA	3.40857702783167e-16	NA	NA	NA	0.972	NA	0.053859	GO:0070050	neuron cellular homeostasis	2/139	34/18866	0.0259223	0.336848	0.314727	CALB2/SLC8A2	2
TMEM170B	1	0	0	1	0	NA	NA	0.212788226300967	NA	NA	NA	1.07089485471013e-16	NA	NA	NA	0.577	NA	0.0531971	GO:0070102	interleukin-6-mediated signaling pathway	2/139	34/18866	0.0259223	0.336848	0.314727	C1QTNF4/SMAD4	2
SIPA1L1	1	0	0	1	0	NA	NA	0.211729898776647	NA	NA	NA	2.32274893733065e-13	NA	NA	NA	0.731	NA	0.0529325	GO:0099084	postsynaptic specialization organization	2/139	34/18866	0.0259223	0.336848	0.314727	NTRK3/NLGN2	2
MLF2	1	0	1	0	0	NA	0.209730221738271	NA	NA	NA	9.64231240372594e-41	NA	NA	NA	0.937	NA	NA	0.0524326	GO:0070372	regulation of ERK1 and ERK2 cascade	6/139	306/18866	0.0259555	0.336848	0.314727	CAMK2N1/PTK2B/JUN/SMAD4/BRAF/FLCN	6
ATP2B2	1	0	0	1	0	NA	NA	0.20936021554734	NA	NA	NA	3.05745077385289e-13	NA	NA	NA	0.881	NA	0.0523401	GO:0051028	mRNA transport	4/139	152/18866	0.0261321	0.337276	0.315126	THOC3/CDC40/AGFG1/NXF1	4
RASGRF2	1	0	0	1	0	NA	NA	0.203578159008962	NA	NA	NA	1.41453211472598e-18	NA	NA	NA	0.434	NA	0.0508945	GO:0010977	negative regulation of neuron projection development	4/139	154/18866	0.027245	0.344251	0.321643	PRAG1/FGF13/SEMA5B/DAB1	4
WIF1	1	0	0	1	0	NA	NA	0.203574112989537	NA	NA	NA	3.30967747180295e-24	NA	NA	NA	0.304	NA	0.0508935	GO:0006471	protein ADP-ribosylation	2/139	35/18866	0.0273627	0.344251	0.321643	ART3/TNKS2	2
SEZ6L	1	0	0	0	1	NA	NA	NA	0.202080730395271	NA	NA	NA	1.65110940908263e-15	NA	NA	NA	0.746	0.0505202	GO:0097009	energy homeostasis	2/139	35/18866	0.0273627	0.344251	0.321643	AMPD2/FLCN	2
IGFBP5	1	1	0	0	0	0.198264449064361	NA	NA	NA	2.68799399362453e-25	NA	NA	NA	0.442	NA	NA	NA	0.0495661	GO:0045137	development of primary sexual characteristics	5/139	229/18866	0.0274052	0.344251	0.321643	VGF/KITLG/SMAD4/CEBPB/FNDC3A	5
PIK3R2	1	0	1	0	0	NA	0.195885998862354	NA	NA	NA	1.38069168388661e-42	NA	NA	NA	0.54	NA	NA	0.0489715	GO:0050920	regulation of chemotaxis	5/139	229/18866	0.0274052	0.344251	0.321643	NTRK3/PTK2B/CDH13/SEMA5B/MAPK14	5
CUX2	1	0	0	1	0	NA	NA	0.195698259015468	NA	NA	NA	8.8468383465481e-34	NA	NA	NA	0.266	NA	0.0489246	GO:0008360	regulation of cell shape	4/139	156/18866	0.0283859	0.352796	0.329627	BAIAP2/PTK2B/PRAG1/FGD1	4
TMOD1	1	0	0	1	0	NA	NA	0.193899204336592	NA	NA	NA	3.27255671212155e-15	NA	NA	NA	0.437	NA	0.0484748	GO:0030902	hindbrain development	4/139	156/18866	0.0283859	0.352796	0.329627	NEUROD1/SEZ6/SSTR1/DAB1	4
WASF1	1	0	0	1	0	NA	NA	0.19375314981088	NA	NA	NA	7.91773804052171e-13	NA	NA	NA	0.895	NA	0.0484383	GO:0071402	cellular response to lipoprotein particle stimulus	2/139	36/18866	0.0288346	0.356054	0.332671	MIA3/CDH13	2
P2RX7	1	0	1	0	0	NA	0.192958621840918	NA	NA	NA	2.72697660339827e-51	NA	NA	NA	0.347	NA	NA	0.0482397	GO:0046879	hormone secretion	6/139	314/18866	0.0289512	0.356054	0.332671	NEUROD1/VGF/RFX3/SMAD4/NLGN2/VIP	6
CEMIP2	1	0	1	0	0	NA	0.190250541083242	NA	NA	NA	5.17618001109896e-60	NA	NA	NA	0.304	NA	NA	0.0475626	GO:0007188	adenylate cyclase-modulating G protein-coupled receptor signaling pathway	5/139	233/18866	0.0292287	0.357595	0.334111	AKAP5/GNAL/PDE2A/ADGRB2/VIP	5
KCTD1	1	0	0	1	0	NA	NA	0.190023296164766	NA	NA	NA	6.7802281083942e-17	NA	NA	NA	0.5	NA	0.0475058	GO:0060402	calcium ion transport into cytosol	4/139	158/18866	0.0295549	0.359712	0.336089	PTK2B/SLC8A2/LIME1/GRIN2C	4
LTK	1	0	1	0	0	NA	0.18986312377262	NA	NA	NA	4.65603385547045e-87	NA	NA	NA	0.245	NA	NA	0.0474658	GO:0033363	secretory granule organization	2/139	37/18866	0.0303377	0.367278	0.343158	DTNBP1/AGFG1	2
ANO3	1	0	0	1	0	NA	NA	0.189494399281017	NA	NA	NA	2.04832174127969e-17	NA	NA	NA	0.416	NA	0.0473736	GO:0043414	macromolecule methylation	6/139	318/18866	0.0305311	0.367278	0.343158	TARBP1/RIF1/SMAD4/TDRD9/AUTS2/PRMT8	6
LONRF2	1	0	1	0	0	NA	0.189307851604516	NA	NA	NA	5.41528751218141e-31	NA	NA	NA	0.829	NA	NA	0.047327	GO:0060560	developmental growth involved in morphogenesis	5/139	236/18866	0.0306456	0.367278	0.343158	NTRK3/PAK6/FGF13/AUTS2/SEMA5B	5
ZNF365	1	0	0	1	0	NA	NA	0.18918602497053	NA	NA	NA	8.58551193779645e-13	NA	NA	NA	0.633	NA	0.0472965	GO:0051961	negative regulation of nervous system development	6/139	319/18866	0.0309348	0.368862	0.344638	NTRK3/PRAG1/FGF13/SEMA5B/JAG1/DAB1	6
STIM1	1	0	0	1	0	NA	NA	0.188696951496272	NA	NA	NA	4.28898508751434e-15	NA	NA	NA	0.566	NA	0.0471742	GO:0048588	developmental cell growth	5/139	237/18866	0.0311273	0.369283	0.345032	NTRK3/PAK6/FGF13/AUTS2/SEMA5B	5
H1FX	1	0	1	0	0	NA	0.186310166459082	NA	NA	NA	3.3485181239138e-38	NA	NA	NA	0.919	NA	NA	0.0465775	GO:0022604	regulation of cell morphogenesis	8/139	499/18866	0.0316045	0.37306	0.348561	BAIAP2/NTRK3/PTK2B/PRAG1/FGF13/SEMA5B/FGD1/DAB1	8
SLC7A14	1	0	1	0	0	NA	0.186261203658972	NA	NA	NA	3.80682067078616e-41	NA	NA	NA	0.409	NA	NA	0.0465653	GO:0051591	response to cAMP	3/139	94/18866	0.0322737	0.377169	0.352399	PDE2A/PTK2B/VGF	3
CEP126	1	0	0	1	0	NA	NA	0.185867535344005	NA	NA	NA	6.8866909273994e-18	NA	NA	NA	0.364	NA	0.0464669	GO:0098876	vesicle-mediated transport to the plasma membrane	3/139	94/18866	0.0322737	0.377169	0.352399	AKAP5/STXBP6/ACSL3	3
AC008780.1	1	0	1	0	0	NA	0.185319306230754	NA	NA	NA	9.6354508422118e-74	NA	NA	NA	0.268	NA	NA	0.0463298	GO:0009914	hormone transport	6/139	323/18866	0.0325844	0.377587	0.35279	NEUROD1/VGF/RFX3/SMAD4/NLGN2/VIP	6
PDZD2	1	0	0	1	0	NA	NA	0.183849180670951	NA	NA	NA	8.51718367059649e-14	NA	NA	NA	0.451	NA	0.0459623	GO:0070167	regulation of biomineral tissue development	3/139	95/18866	0.0331515	0.377587	0.35279	PTK2B/MGP/CEBPB	3
GPR22	1	0	1	0	0	NA	0.18240360000228	NA	NA	NA	1.06672167635308e-47	NA	NA	NA	0.327	NA	NA	0.0456009	GO:0110149	regulation of biomineralization	3/139	95/18866	0.0331515	0.377587	0.35279	PTK2B/MGP/CEBPB	3
ADGRL3	1	0	1	0	0	NA	0.181387099138469	NA	NA	NA	2.87690069887004e-39	NA	NA	NA	0.46	NA	NA	0.0453468	GO:0001764	neuron migration	4/139	164/18866	0.0332316	0.377587	0.35279	NTRK3/FGF13/AUTS2/DAB1	4
NEURL1	1	0	1	0	0	NA	0.180820459466464	NA	NA	NA	5.95476347981054e-36	NA	NA	NA	0.479	NA	NA	0.0452051	GO:0070371	ERK1 and ERK2 cascade	6/139	325/18866	0.0334303	0.377587	0.35279	CAMK2N1/PTK2B/JUN/SMAD4/BRAF/FLCN	6
CA10	1	0	0	1	0	NA	NA	0.17549022390737	NA	NA	NA	1.18081591742477e-13	NA	NA	NA	0.535	NA	0.0438726	GO:0006656	phosphatidylcholine biosynthetic process	2/139	39/18866	0.0334347	0.377587	0.35279	ACSL3/CHKB	2
ENC1	1	1	0	0	0	0.175450973781274	NA	NA	NA	3.69352463242448e-32	NA	NA	NA	1	NA	NA	NA	0.0438627	GO:0016601	Rac protein signal transduction	2/139	39/18866	0.0334347	0.377587	0.35279	CDH13/AUTS2	2
PPP4R4	1	0	1	0	0	NA	0.17413224842404	NA	NA	NA	8.40870427953003e-46	NA	NA	NA	0.308	NA	NA	0.0435331	GO:0006813	potassium ion transport	5/139	242/18866	0.0336075	0.377722	0.352916	DPP6/PTK2B/SLC24A4/SLC9A7/VIP	5
VGLL4	1	0	1	0	0	NA	0.173940573090384	NA	NA	NA	6.15373164332561e-40	NA	NA	NA	0.413	NA	NA	0.0434851	GO:0006730	one-carbon metabolic process	2/139	40/18866	0.0350277	0.39181	0.366079	CA4/CA11	2
NQO1	1	0	0	1	0	NA	NA	0.172815306048919	NA	NA	NA	1.06620020409694e-12	NA	NA	NA	0.374	NA	0.0432038	GO:0010771	negative regulation of cell morphogenesis involved in differentiation	3/139	98/18866	0.0358592	0.397326	0.371233	FGF13/SEMA5B/DAB1	3
TERF2IP	1	0	1	0	0	NA	0.171710148330066	NA	NA	NA	4.97058118925843e-33	NA	NA	NA	0.927	NA	NA	0.0429275	GO:0048010	vascular endothelial growth factor receptor signaling pathway	3/139	98/18866	0.0358592	0.397326	0.371233	BAIAP2/PTK2B/MAPK14	3
TRIO	1	0	0	1	0	NA	NA	0.171320194129225	NA	NA	NA	2.85093074680167e-10	NA	NA	NA	0.636	NA	0.04283	GO:0032147	activation of protein kinase activity	6/139	331/18866	0.0360533	0.397602	0.371491	NTRK3/PTK2B/PAK6/FGF13/BRAF/MAPK14	6
SUN1	1	0	1	0	0	NA	0.171159500579977	NA	NA	NA	2.87323651693715e-33	NA	NA	NA	0.437	NA	NA	0.0427899	GO:0043267	negative regulation of potassium ion transport	2/139	41/18866	0.0366496	0.398565	0.37239	PTK2B/VIP	2
IQSEC2	1	0	0	1	0	NA	NA	0.170330016892715	NA	NA	NA	9.04693176638401e-11	NA	NA	NA	0.706	NA	0.0425825	GO:0050434	positive regulation of viral transcription	2/139	41/18866	0.0366496	0.398565	0.37239	JUN/CDK9	2
TAC3	1	0	1	0	0	NA	0.170304362191242	NA	NA	NA	1.09108705645951e-48	NA	NA	NA	0.236	NA	NA	0.0425761	GO:2000826	regulation of heart morphogenesis	2/139	41/18866	0.0366496	0.398565	0.37239	SMAD4/JAG1	2
TMEM196	1	0	1	0	0	NA	0.168525187598963	NA	NA	NA	3.59475041889691e-59	NA	NA	NA	0.247	NA	NA	0.0421313	GO:0050848	regulation of calcium-mediated signaling	3/139	100/18866	0.0377258	0.408377	0.381558	PTK2B/SLC8A2/CDH13	3
SAFB2	1	0	1	0	0	NA	0.168209937586912	NA	NA	NA	2.23178581518418e-30	NA	NA	NA	0.519	NA	NA	0.0420525	GO:0021795	cerebral cortex cell migration	2/139	42/18866	0.0383	0.410807	0.383829	FGF13/DAB1	2
MAN1C1	1	0	0	1	0	NA	NA	0.168147251828519	NA	NA	NA	4.69616301030238e-13	NA	NA	NA	0.49	NA	0.0420368	GO:0048246	macrophage chemotaxis	2/139	42/18866	0.0383	0.410807	0.383829	PTK2B/MAPK14	2
CDK5	1	0	0	1	0	NA	NA	0.167777323801725	NA	NA	NA	1.27548038864069e-09	NA	NA	NA	0.615	NA	0.0419443	GO:1990138	neuron projection extension	4/139	172/18866	0.0385324	0.411101	0.384103	NTRK3/PAK6/AUTS2/SEMA5B	4
AC005261.1	1	0	1	0	0	NA	0.166947995885911	NA	NA	NA	5.41863163603309e-33	NA	NA	NA	0.499	NA	NA	0.041737	GO:0031124	mRNA 3'-end processing	3/139	101/18866	0.0386774	0.411101	0.384103	THOC3/CDC40/CDK9	3
SERPINE2	1	1	0	0	0	0.166735308554553	NA	NA	NA	4.34683207289003e-16	NA	NA	NA	0.842	NA	NA	NA	0.0416838	GO:0043502	regulation of muscle adaptation	3/139	102/18866	0.0396413	0.418135	0.390676	SMAD4/TNNT1/CDK9	3
RPS6KA5	1	0	1	0	0	NA	0.166604103678351	NA	NA	NA	6.35568491753298e-41	NA	NA	NA	0.321	NA	NA	0.041651	GO:0035725	sodium ion transmembrane transport	4/139	174/18866	0.039929	0.418135	0.390676	SLC24A4/SLC8A2/SLC9A7/FGF13	4
RTN4RL1	1	0	1	0	0	NA	0.164097105366037	NA	NA	NA	3.89978519184502e-44	NA	NA	NA	0.285	NA	NA	0.0410243	GO:0001953	negative regulation of cell-matrix adhesion	2/139	43/18866	0.0399784	0.418135	0.390676	ARHGAP6/JAG1	2
ITGA3	1	0	0	1	0	NA	NA	0.162874047705739	NA	NA	NA	2.99165775010139e-13	NA	NA	NA	0.343	NA	0.0407185	GO:0045926	negative regulation of growth	5/139	254/18866	0.0400513	0.418135	0.390676	TSPYL2/FGF13/SMAD4/SEMA5B/FLCN	5
IGSF8	1	0	1	0	0	NA	0.162819169587121	NA	NA	NA	3.56346328276404e-26	NA	NA	NA	0.823	NA	NA	0.0407048	GO:0016050	vesicle organization	6/139	340/18866	0.0402308	0.418151	0.390691	CPLX2/STXBP6/DTNBP1/TMEM127/MIA3/AGFG1	6
C12orf29	1	0	1	0	0	NA	0.162262006739616	NA	NA	NA	1.47970699532294e-35	NA	NA	NA	0.353	NA	NA	0.0405655	GO:0006195	purine nucleotide catabolic process	2/139	44/18866	0.0416841	0.424772	0.396876	PDE8B/PDE2A	2
SLITRK4	1	1	0	0	0	0.161331430479077	NA	NA	NA	1.20825832320366e-12	NA	NA	NA	0.527	NA	NA	NA	0.0403329	GO:1901985	positive regulation of protein acetylation	2/139	44/18866	0.0416841	0.424772	0.396876	SMAD4/AUTS2	2
JPH1	1	0	1	0	0	NA	0.161082410307516	NA	NA	NA	3.32629424881437e-49	NA	NA	NA	0.266	NA	NA	0.0402706	GO:1905521	regulation of macrophage migration	2/139	44/18866	0.0416841	0.424772	0.396876	PTK2B/MAPK14	2
TMEM178B	1	0	0	1	0	NA	NA	0.160649805794823	NA	NA	NA	4.79120806462246e-11	NA	NA	NA	0.388	NA	0.0401625	GO:0006650	glycerophospholipid metabolic process	6/139	343/18866	0.0416889	0.424772	0.396876	DGKB/PLEKHA2/DGKA/ACSL3/MTMR7/CHKB	6
CNR1	1	1	0	0	0	0.159735011681134	NA	NA	NA	5.95570702336481e-13	NA	NA	NA	0.411	NA	NA	NA	0.0399338	GO:0030072	peptide hormone secretion	5/139	257/18866	0.0417719	0.424772	0.396876	NEUROD1/VGF/RFX3/NLGN2/VIP	5
BOD1L1	1	0	1	0	0	NA	0.158741098103742	NA	NA	NA	6.19523138819127e-30	NA	NA	NA	0.377	NA	NA	0.0396853	GO:1902414	protein localization to cell junction	3/139	105/18866	0.0426056	0.426721	0.398697	BAIAP2/NLGN2/GRIN2C	3
LRIF1	1	0	1	0	0	NA	0.158237654078372	NA	NA	NA	5.94530485998119e-48	NA	NA	NA	0.265	NA	NA	0.0395594	GO:0071902	positive regulation of protein serine/threonine kinase activity	6/139	345/18866	0.0426793	0.426721	0.398697	NTRK3/PTK2B/SLC8A2/KITLG/BRAF/MAPK14	6
HPCAL4	1	0	1	0	0	NA	0.157726326388144	NA	NA	NA	2.60489328275625e-26	NA	NA	NA	0.853	NA	NA	0.0394316	GO:0060401	cytosolic calcium ion transport	4/139	178/18866	0.0428082	0.426721	0.398697	PTK2B/SLC8A2/LIME1/GRIN2C	4
CD53	1	0	1	0	0	NA	0.15424665232724	NA	NA	NA	7.96995481421968e-37	NA	NA	NA	0.295	NA	NA	0.0385617	GO:0001974	blood vessel remodeling	2/139	45/18866	0.0434169	0.426721	0.398697	ABR/JAG1	2
GNG10	1	0	0	1	0	NA	NA	0.154122012789843	NA	NA	NA	3.6556519783275e-10	NA	NA	NA	0.629	NA	0.0385305	GO:0003197	endocardial cushion development	2/139	45/18866	0.0434169	0.426721	0.398697	SMAD4/JAG1	2
PRKCA	1	0	0	1	0	NA	NA	0.154066595696755	NA	NA	NA	2.86063897436174e-07	NA	NA	NA	0.811	NA	0.0385166	GO:0010828	positive regulation of glucose transmembrane transport	2/139	45/18866	0.0434169	0.426721	0.398697	BRAF/MAPK14	2
BSG	1	0	0	1	0	NA	NA	0.153958389919892	NA	NA	NA	7.24412215117781e-10	NA	NA	NA	0.993	NA	0.0384896	GO:0031018	endocrine pancreas development	2/139	45/18866	0.0434169	0.426721	0.398697	NEUROD1/RFX3	2
HNRNPLL	1	0	1	0	0	NA	0.153188250257377	NA	NA	NA	6.48794858379236e-34	NA	NA	NA	0.378	NA	NA	0.0382971	GO:0043114	regulation of vascular permeability	2/139	45/18866	0.0434169	0.426721	0.398697	PDE2A/ABR	2
DRP2	1	0	1	0	0	NA	0.152885985310321	NA	NA	NA	3.53333117265301e-35	NA	NA	NA	0.262	NA	NA	0.0382215	GO:1904029	regulation of cyclin-dependent protein kinase activity	3/139	106/18866	0.0436178	0.426909	0.398873	CAMK2N1/CCNG2/CCNO	3
RNF175	1	0	1	0	0	NA	0.152858978931839	NA	NA	NA	6.62809511791802e-35	NA	NA	NA	0.338	NA	NA	0.0382147	GO:0043266	regulation of potassium ion transport	3/139	107/18866	0.044642	0.431377	0.403048	DPP6/PTK2B/VIP	3
SGSM3	1	0	0	1	0	NA	NA	0.15266928954735	NA	NA	NA	1.98707815142016e-10	NA	NA	NA	0.517	NA	0.0381673	GO:0050905	neuromuscular process	3/139	107/18866	0.044642	0.431377	0.403048	NLGN2/ABR/GRIN2C	3
ARID4A	1	0	1	0	0	NA	0.152635154616772	NA	NA	NA	4.45140513279009e-41	NA	NA	NA	0.292	NA	NA	0.0381588	GO:0051963	regulation of synapse assembly	3/139	107/18866	0.044642	0.431377	0.403048	NTRK3/ADGRB2/NLGN2	3
MIAT	1	0	0	1	0	NA	NA	0.151510029652649	NA	NA	NA	2.73749457369245e-06	NA	NA	NA	0.769	NA	0.0378775	GO:0010863	positive regulation of phospholipase C activity	2/139	46/18866	0.0451761	0.431377	0.403048	NTRK3/ARHGAP6	2
LRRC4B	1	0	0	1	0	NA	NA	0.15106832842894	NA	NA	NA	7.14057670991648e-07	NA	NA	NA	0.762	NA	0.0377671	GO:0014014	negative regulation of gliogenesis	2/139	46/18866	0.0451761	0.431377	0.403048	NTRK3/DAB1	2
IGFBP6	1	0	0	1	0	NA	NA	0.15102806682612	NA	NA	NA	1.55572244769739e-13	NA	NA	NA	0.315	NA	0.037757	GO:0032007	negative regulation of TOR signaling	2/139	46/18866	0.0451761	0.431377	0.403048	TMEM127/FLCN	2
FZD3	1	0	0	1	0	NA	NA	0.150987889554398	NA	NA	NA	3.0828299550389e-09	NA	NA	NA	0.497	NA	0.037747	GO:0043406	positive regulation of MAP kinase activity	5/139	264/18866	0.0459589	0.437052	0.40835	NTRK3/PTK2B/KITLG/BRAF/MAPK14	5
TTC33	1	0	1	0	0	NA	0.150333164362248	NA	NA	NA	4.54414735780782e-28	NA	NA	NA	0.365	NA	NA	0.0375833	GO:0001933	negative regulation of protein phosphorylation	7/139	444/18866	0.0463561	0.437052	0.40835	NTRK3/CAMK2N1/JUN/DTNBP1/DUSP14/SMAD4/FLCN	7
KCNH1	1	0	0	1	0	NA	NA	0.149754793298841	NA	NA	NA	1.98967522570332e-14	NA	NA	NA	0.262	NA	0.0374387	GO:0021761	limbic system development	3/139	109/18866	0.0467262	0.437052	0.40835	NEUROD1/FGF13/DAB1	3
XPO6	1	0	1	0	0	NA	0.149141946616837	NA	NA	NA	1.65268875232918e-28	NA	NA	NA	0.412	NA	NA	0.0372855	GO:0006913	nucleocytoplasmic transport	6/139	354/18866	0.0473193	0.437052	0.40835	NEUROD1/THOC3/CDC40/AGFG1/MAPK14/NXF1	6
AFAP1	1	0	1	0	0	NA	0.148969290067532	NA	NA	NA	1.95328387334201e-46	NA	NA	NA	0.253	NA	NA	0.0372423	GO:0006479	protein methylation	4/139	184/18866	0.0473415	0.437052	0.40835	RIF1/SMAD4/AUTS2/PRMT8	4
PIP5K1B	1	0	1	0	0	NA	0.14879357524944	NA	NA	NA	2.96841927642908e-39	NA	NA	NA	0.278	NA	NA	0.0371984	GO:0006611	protein export from nucleus	4/139	184/18866	0.0473415	0.437052	0.40835	THOC3/CDC40/AGFG1/NXF1	4
C9orf16	1	0	0	1	0	NA	NA	0.148137548802079	NA	NA	NA	8.86847966552241e-07	NA	NA	NA	0.958	NA	0.0370344	GO:0007416	synapse assembly	4/139	184/18866	0.0473415	0.437052	0.40835	NTRK3/ADGRB2/FGF13/NLGN2	4
ERO1A	1	0	1	0	0	NA	0.147793793565054	NA	NA	NA	7.39854706880004e-29	NA	NA	NA	0.388	NA	NA	0.0369484	GO:0008213	protein alkylation	4/139	184/18866	0.0473415	0.437052	0.40835	RIF1/SMAD4/AUTS2/PRMT8	4
ATP2B4	1	0	0	0	1	NA	NA	NA	0.14775441102707	NA	NA	NA	1.40272157133944e-10	NA	NA	NA	0.921	0.0369386	GO:0033044	regulation of chromosome organization	6/139	356/18866	0.0483914	0.437052	0.40835	RIF1/SMAD4/AUTS2/TNKS2/FLCN/CDK9	6
CSRNP2	1	0	1	0	0	NA	0.147567118226319	NA	NA	NA	1.19290461798069e-30	NA	NA	NA	0.324	NA	NA	0.0368918	GO:0031952	regulation of protein autophosphorylation	2/139	48/18866	0.0487722	0.437052	0.40835	MOB1B/JUN	2
PAQR3	1	0	0	1	0	NA	NA	0.147377400407934	NA	NA	NA	1.80264654722499e-11	NA	NA	NA	0.36	NA	0.0368444	GO:1900271	regulation of long-term synaptic potentiation	2/139	48/18866	0.0487722	0.437052	0.40835	CALB2/AKAP5	2
HACD2	1	0	1	0	0	NA	0.146880570794484	NA	NA	NA	4.45723378418705e-30	NA	NA	NA	0.374	NA	NA	0.0367201	GO:1900274	regulation of phospholipase C activity	2/139	48/18866	0.0487722	0.437052	0.40835	NTRK3/ARHGAP6	2
OGA	1	0	1	0	0	NA	0.146596753456156	NA	NA	NA	3.00818989964354e-26	NA	NA	NA	0.847	NA	NA	0.0366492	GO:1904036	negative regulation of epithelial cell apoptotic process	2/139	48/18866	0.0487722	0.437052	0.40835	WFS1/NEUROD1	2
PTPRG	1	0	0	1	0	NA	NA	0.146300462895723	NA	NA	NA	9.76630672239008e-11	NA	NA	NA	0.378	NA	0.0365751	GO:0061387	regulation of extent of cell growth	3/139	111/18866	0.0488577	0.437052	0.40835	NTRK3/FGF13/SEMA5B	3
ARF1	1	0	1	0	0	NA	0.145354809065602	NA	NA	NA	4.47956391694968e-25	NA	NA	NA	0.953	NA	NA	0.0363387	GO:0050770	regulation of axonogenesis	4/139	186/18866	0.0489097	0.437052	0.40835	NTRK3/FGF13/SEMA5B/DAB1	4
RAPGEF2	1	0	0	1	0	NA	NA	0.145186472082907	NA	NA	NA	1.85504024877422e-09	NA	NA	NA	0.664	NA	0.0362966	GO:0051169	nuclear transport	6/139	357/18866	0.048933	0.437052	0.40835	NEUROD1/THOC3/CDC40/AGFG1/MAPK14/NXF1	6
CCPG1	1	0	1	0	0	NA	0.144659270510242	NA	NA	NA	6.39801124980852e-29	NA	NA	NA	0.436	NA	NA	0.0361648	GO:0043409	negative regulation of MAPK cascade	4/139	187/18866	0.0497046	0.437052	0.40835	CAMK2N1/DUSP14/SMAD4/FLCN	4
PRRT2	1	0	0	1	0	NA	NA	0.144639249130707	NA	NA	NA	2.02599562802787e-07	NA	NA	NA	0.797	NA	0.0361598	GO:0010927	cellular component assembly involved in morphogenesis	3/139	112/18866	0.0499412	0.437052	0.40835	SMAD4/AGFG1/TNNT1	3
PCDH7	1	0	0	0	1	NA	NA	NA	0.144595330485086	NA	NA	NA	9.06070309238395e-10	NA	NA	NA	0.715	0.0361488
TARDBP	1	0	1	0	0	NA	0.143240111767469	NA	NA	NA	3.02058214180785e-26	NA	NA	NA	0.488	NA	NA	0.03581
THSD7A	1	0	1	0	0	NA	0.142610367229644	NA	NA	NA	1.07974034859352e-45	NA	NA	NA	0.223	NA	NA	0.0356526
SUB1	1	0	0	1	0	NA	NA	0.141937437258278	NA	NA	NA	4.41660320559715e-07	NA	NA	NA	0.937	NA	0.0354844
EML1	1	0	1	0	0	NA	0.141908948727987	NA	NA	NA	3.05923615825654e-41	NA	NA	NA	0.236	NA	NA	0.0354772
NAA60	1	0	1	0	0	NA	0.141865487878445	NA	NA	NA	1.11992103551439e-29	NA	NA	NA	0.353	NA	NA	0.0354664
GLRX5	1	0	0	1	0	NA	NA	0.141563773693232	NA	NA	NA	2.08922626244373e-07	NA	NA	NA	0.545	NA	0.0353909
RAB11FIP3	1	0	0	1	0	NA	NA	0.141530553585098	NA	NA	NA	8.10657899082124e-07	NA	NA	NA	0.545	NA	0.0353826
BZW2	1	0	1	0	0	NA	0.141228630934225	NA	NA	NA	9.1143565531628e-30	NA	NA	NA	0.271	NA	NA	0.0353072
B3GNT2	1	0	0	1	0	NA	NA	0.141171777536902	NA	NA	NA	3.07394456949973e-17	NA	NA	NA	0.234	NA	0.0352929
SH3BP5L	1	0	1	0	0	NA	0.140805340260562	NA	NA	NA	6.61710623604356e-28	NA	NA	NA	0.304	NA	NA	0.0352013
HERPUD1	1	0	0	1	0	NA	NA	0.140471318648348	NA	NA	NA	1.10036331012924e-07	NA	NA	NA	0.455	NA	0.0351178
SDCBP2	1	0	1	0	0	NA	0.140136115691006	NA	NA	NA	1.22153115339911e-33	NA	NA	NA	0.292	NA	NA	0.035034
MRPL36	1	0	0	1	0	NA	NA	0.139965334508056	NA	NA	NA	1.21293966888154e-07	NA	NA	NA	0.388	NA	0.0349913
ARHGAP33	1	0	1	0	0	NA	0.139089338123473	NA	NA	NA	1.14818953169991e-28	NA	NA	NA	0.299	NA	NA	0.0347723
KBTBD11	1	0	0	1	0	NA	NA	0.138647761553476	NA	NA	NA	2.5382926313051e-07	NA	NA	NA	0.717	NA	0.0346619
ADIPOR1	1	0	1	0	0	NA	0.138565676860776	NA	NA	NA	1.01587447025869e-24	NA	NA	NA	0.46	NA	NA	0.0346414
DOCK4	1	0	0	1	0	NA	NA	0.138493697875174	NA	NA	NA	2.70135339639762e-09	NA	NA	NA	0.573	NA	0.0346234
REPS1	1	0	0	1	0	NA	NA	0.13834826723587	NA	NA	NA	6.88690582716247e-07	NA	NA	NA	0.385	NA	0.0345871
MROH1	1	0	1	0	0	NA	0.138065503009441	NA	NA	NA	6.34061049054234e-24	NA	NA	NA	0.376	NA	NA	0.0345164
UNC5D	1	0	0	1	0	NA	NA	0.137925516041707	NA	NA	NA	6.9680277540339e-10	NA	NA	NA	0.311	NA	0.0344814
MATN2	1	0	0	0	1	NA	NA	NA	0.137831922364497	NA	NA	NA	6.65124294917837e-15	NA	NA	NA	0.329	0.034458
LUC7L	1	0	1	0	0	NA	0.137742460510861	NA	NA	NA	2.41999646348791e-28	NA	NA	NA	0.453	NA	NA	0.0344356
SHISA8	1	0	1	0	0	NA	0.137424497891502	NA	NA	NA	2.49463825834051e-45	NA	NA	NA	0.203	NA	NA	0.0343561
B4GALT2	1	0	0	1	0	NA	NA	0.137089125163583	NA	NA	NA	6.19071690071072e-09	NA	NA	NA	0.507	NA	0.0342723
ZMIZ1	1	0	1	0	0	NA	0.137071629754489	NA	NA	NA	5.26847367585625e-25	NA	NA	NA	0.468	NA	NA	0.0342679
MAGI1	1	0	1	0	0	NA	0.136929089582363	NA	NA	NA	6.07169070047115e-29	NA	NA	NA	0.296	NA	NA	0.0342323
BEND6	1	0	0	1	0	NA	NA	0.13685472714372	NA	NA	NA	1.58600620472436e-09	NA	NA	NA	0.388	NA	0.0342137
COPZ1	1	0	0	1	0	NA	NA	0.1367846197381	NA	NA	NA	1.55675484453621e-06	NA	NA	NA	0.503	NA	0.0341962
KLHL2	1	0	0	1	0	NA	NA	0.136289213894677	NA	NA	NA	5.33239722476239e-07	NA	NA	NA	0.71	NA	0.0340723
GSDME	1	0	1	0	0	NA	0.136200245107537	NA	NA	NA	2.79121965379665e-34	NA	NA	NA	0.235	NA	NA	0.0340501
VWA3A	1	0	1	0	0	NA	0.136162398097762	NA	NA	NA	1.9318391955163e-49	NA	NA	NA	0.181	NA	NA	0.0340406
HINT2	1	0	0	1	0	NA	NA	0.135678241296936	NA	NA	NA	4.28162290165313e-10	NA	NA	NA	0.399	NA	0.0339196
ZNF529	1	0	1	0	0	NA	0.135558889075703	NA	NA	NA	8.21905536290684e-30	NA	NA	NA	0.285	NA	NA	0.0338897
FBLN2	1	0	0	1	0	NA	NA	0.135527634217232	NA	NA	NA	1.03419147185323e-18	NA	NA	NA	0.196	NA	0.0338819
RGS14	1	0	1	0	0	NA	0.135307883947205	NA	NA	NA	1.00375633062164e-37	NA	NA	NA	0.296	NA	NA	0.033827
FAM122B	1	0	1	0	0	NA	0.134991917892079	NA	NA	NA	3.17036804227665e-28	NA	NA	NA	0.331	NA	NA	0.033748
MTREX	1	0	0	1	0	NA	NA	0.134470935788444	NA	NA	NA	2.11447833970037e-09	NA	NA	NA	0.388	NA	0.0336177
SRSF4	1	0	1	0	0	NA	0.13406212604667	NA	NA	NA	4.77275706172836e-22	NA	NA	NA	0.367	NA	NA	0.0335155
MAP4K3	1	0	1	0	0	NA	0.133886085736437	NA	NA	NA	9.1980433287413e-30	NA	NA	NA	0.299	NA	NA	0.0334715
SLF1	1	0	1	0	0	NA	0.133839740679539	NA	NA	NA	6.8860035006139e-38	NA	NA	NA	0.226	NA	NA	0.0334599
PSRC1	1	0	1	0	0	NA	0.133786728248112	NA	NA	NA	3.01169527489501e-25	NA	NA	NA	0.331	NA	NA	0.0334467
GPR88	1	0	0	1	0	NA	NA	0.133619217110721	NA	NA	NA	1.02481521733082e-11	NA	NA	NA	0.231	NA	0.0334048
CDH9	1	0	1	0	0	NA	0.133299987336195	NA	NA	NA	2.24601132593097e-48	NA	NA	NA	0.191	NA	NA	0.033325
MBD1	1	0	1	0	0	NA	0.133134367970404	NA	NA	NA	5.38717835169986e-27	NA	NA	NA	0.383	NA	NA	0.0332836
EEF1E1	1	0	0	1	0	NA	NA	0.133131288888588	NA	NA	NA	1.08771710855304e-07	NA	NA	NA	0.325	NA	0.0332828
FEM1C	1	0	1	0	0	NA	0.132763335737721	NA	NA	NA	1.57971534992024e-26	NA	NA	NA	0.278	NA	NA	0.0331908
P2RX2	1	0	0	1	0	NA	NA	0.132564032292467	NA	NA	NA	3.46118448332699e-50	NA	NA	NA	0.147	NA	0.033141
GOSR1	1	0	0	1	0	NA	NA	0.132367523596325	NA	NA	NA	7.50615139477094e-13	NA	NA	NA	0.283	NA	0.0330919
GABRA2	1	0	1	0	0	NA	0.132190275580884	NA	NA	NA	7.88980340831433e-22	NA	NA	NA	0.348	NA	NA	0.0330476
COG6	1	0	0	1	0	NA	NA	0.13202055541586	NA	NA	NA	2.29599568004337e-11	NA	NA	NA	0.294	NA	0.0330051
YIPF4	1	0	1	0	0	NA	0.131185002381798	NA	NA	NA	1.79674686777326e-22	NA	NA	NA	0.378	NA	NA	0.0327963
LYPLA2	1	0	0	1	0	NA	NA	0.131146691052841	NA	NA	NA	5.03340347351082e-10	NA	NA	NA	0.42	NA	0.0327867
UBL5	1	0	0	1	0	NA	NA	0.131004175984321	NA	NA	NA	1.91318646438168e-07	NA	NA	NA	0.969	NA	0.032751
KMT2A	1	0	1	0	0	NA	0.130947176112766	NA	NA	NA	2.40598312736662e-26	NA	NA	NA	0.39	NA	NA	0.0327368
HELZ	1	0	0	1	0	NA	NA	0.130892715630653	NA	NA	NA	2.82976440226071e-09	NA	NA	NA	0.367	NA	0.0327232
SLC1A4	1	0	1	0	0	NA	0.130792306519693	NA	NA	NA	4.94115425337592e-26	NA	NA	NA	0.501	NA	NA	0.0326981
TLE3	1	0	0	0	1	NA	NA	NA	0.130291464065324	NA	NA	NA	9.29775480028222e-16	NA	NA	NA	0.331	0.0325729
LINC00507	1	1	0	0	0	0.130116477524453	NA	NA	NA	8.93223558006113e-16	NA	NA	NA	0.345	NA	NA	NA	0.0325291
PRKCD	1	0	0	1	0	NA	NA	0.129523943175263	NA	NA	NA	1.593093940093e-10	NA	NA	NA	0.287	NA	0.032381
CSMD1	1	0	1	0	0	NA	0.129498183168766	NA	NA	NA	4.41223185527198e-31	NA	NA	NA	0.224	NA	NA	0.0323745
FBLN7	1	0	1	0	0	NA	0.129351244435274	NA	NA	NA	8.64393630778508e-40	NA	NA	NA	0.194	NA	NA	0.0323378
EP400	1	0	1	0	0	NA	0.129040370296572	NA	NA	NA	1.11924153111695e-23	NA	NA	NA	0.304	NA	NA	0.0322601
KLF13	1	0	1	0	0	NA	0.128553227542358	NA	NA	NA	1.29929138066294e-28	NA	NA	NA	0.472	NA	NA	0.0321383
SCN3A	1	0	1	0	0	NA	0.128476446072301	NA	NA	NA	1.72931991831647e-25	NA	NA	NA	0.291	NA	NA	0.0321191
FNDC9	1	0	1	0	0	NA	0.128157214442666	NA	NA	NA	1.70097290380297e-44	NA	NA	NA	0.199	NA	NA	0.0320393
FBXO44	1	0	0	1	0	NA	NA	0.127985584018803	NA	NA	NA	0.000468064212249613	NA	NA	NA	0.801	NA	0.0319964
FAT3	1	0	1	0	0	NA	0.127796008575704	NA	NA	NA	2.17772338358837e-27	NA	NA	NA	0.275	NA	NA	0.031949
POR	1	0	1	0	0	NA	0.12770299544148	NA	NA	NA	1.45401570265895e-22	NA	NA	NA	0.37	NA	NA	0.0319257
PPP4R2	1	0	1	0	0	NA	0.127350676614179	NA	NA	NA	1.89430639560049e-26	NA	NA	NA	0.364	NA	NA	0.0318377
COX6A1	1	0	0	1	0	NA	NA	0.126839952504734	NA	NA	NA	1.40183402257762e-10	NA	NA	NA	1	NA	0.03171
TTC8	1	0	0	1	0	NA	NA	0.126833065131137	NA	NA	NA	2.64290299013818e-09	NA	NA	NA	0.294	NA	0.0317083
ABCC8	1	0	1	0	0	NA	0.126776149637142	NA	NA	NA	3.10762578056218e-27	NA	NA	NA	0.263	NA	NA	0.031694
ICAM5	1	1	0	0	0	0.126749137509885	NA	NA	NA	4.89816009689982e-11	NA	NA	NA	0.537	NA	NA	NA	0.0316873
HIST3H2A	1	0	1	0	0	NA	0.126268613853477	NA	NA	NA	3.65783535842753e-32	NA	NA	NA	0.247	NA	NA	0.0315672
PDZD4	1	0	0	1	0	NA	NA	0.126229578453906	NA	NA	NA	9.59747104158695e-06	NA	NA	NA	0.843	NA	0.0315574
TUSC1	1	0	1	0	0	NA	0.126215836917436	NA	NA	NA	3.25640005830033e-27	NA	NA	NA	0.276	NA	NA	0.031554
BDNF	1	0	1	0	0	NA	0.125994859437824	NA	NA	NA	6.86562171326924e-61	NA	NA	NA	0.163	NA	NA	0.0314987
CACNA1D	1	0	1	0	0	NA	0.125771264165574	NA	NA	NA	1.63990205798589e-37	NA	NA	NA	0.216	NA	NA	0.0314428
ROBO1	1	0	1	0	0	NA	0.125747833413563	NA	NA	NA	2.72388493409243e-36	NA	NA	NA	0.249	NA	NA	0.031437
EGLN1	1	0	1	0	0	NA	0.125621119030507	NA	NA	NA	1.3489819654177e-22	NA	NA	NA	0.419	NA	NA	0.0314053
IGSF3	1	0	1	0	0	NA	0.125539110943405	NA	NA	NA	3.13299331200432e-36	NA	NA	NA	0.217	NA	NA	0.0313848
ERBB4	1	0	0	1	0	NA	NA	0.125407524915548	NA	NA	NA	5.16684739791581e-08	NA	NA	NA	0.36	NA	0.0313519
MYOM2	1	0	1	0	0	NA	0.12537577616262	NA	NA	NA	5.94247465397366e-30	NA	NA	NA	0.227	NA	NA	0.0313439
ZNF667	1	0	0	1	0	NA	NA	0.125178092185349	NA	NA	NA	4.83525716588034e-10	NA	NA	NA	0.357	NA	0.0312945
LINC02693	1	0	0	1	0	NA	NA	0.124803032400192	NA	NA	NA	8.84844026636394e-08	NA	NA	NA	0.451	NA	0.0312008
IDS	1	0	0	0	1	NA	NA	NA	0.124724193942563	NA	NA	NA	3.85901567735285e-20	NA	NA	NA	1	0.031181
ZBTB38	1	0	1	0	0	NA	0.124513394683793	NA	NA	NA	1.39536210898798e-27	NA	NA	NA	0.4	NA	NA	0.0311283
THAP9-AS1	1	0	1	0	0	NA	0.124285674662795	NA	NA	NA	7.63611830593553e-27	NA	NA	NA	0.247	NA	NA	0.0310714
ZMAT4	1	0	1	0	0	NA	0.124061785710779	NA	NA	NA	5.10651307310815e-30	NA	NA	NA	0.252	NA	NA	0.0310154
FAM133A	1	0	1	0	0	NA	0.123775388832328	NA	NA	NA	7.31021860924572e-38	NA	NA	NA	0.184	NA	NA	0.0309438
GSG1L	1	0	1	0	0	NA	0.123770884824887	NA	NA	NA	9.41071565389775e-34	NA	NA	NA	0.194	NA	NA	0.0309427
PPIL2	1	0	0	1	0	NA	NA	0.123670751269612	NA	NA	NA	4.1287926704571e-09	NA	NA	NA	0.357	NA	0.0309177
DOK6	1	0	0	1	0	NA	NA	0.123517865429649	NA	NA	NA	3.92968472285282e-08	NA	NA	NA	0.444	NA	0.0308795
TBC1D24	1	0	0	1	0	NA	NA	0.123237364544887	NA	NA	NA	5.6410250037836e-08	NA	NA	NA	0.528	NA	0.0308093
GLP2R	1	0	0	1	0	NA	NA	0.123013158723004	NA	NA	NA	1.04368902220752e-19	NA	NA	NA	0.147	NA	0.0307533
SLC25A27	1	0	1	0	0	NA	0.12288022683884	NA	NA	NA	6.57937280734096e-32	NA	NA	NA	0.252	NA	NA	0.0307201
PDPK1	1	0	1	0	0	NA	0.122588234608303	NA	NA	NA	2.96261391637541e-12	NA	NA	NA	0.635	NA	NA	0.0306471
GPALPP1	1	0	0	1	0	NA	NA	0.122500495652529	NA	NA	NA	5.84552876904464e-08	NA	NA	NA	0.325	NA	0.0306251
AL023284.4	1	0	1	0	0	NA	0.122427918680573	NA	NA	NA	2.28797646532781e-34	NA	NA	NA	0.22	NA	NA	0.030607
NCOA1	1	0	0	1	0	NA	NA	0.122352679066973	NA	NA	NA	2.99185417752285e-06	NA	NA	NA	0.703	NA	0.0305882
FAM118B	1	0	0	1	0	NA	NA	0.122308401670506	NA	NA	NA	5.96892511059741e-11	NA	NA	NA	0.262	NA	0.0305771
TEK	1	0	1	0	0	NA	0.122227255730845	NA	NA	NA	2.21870065071443e-35	NA	NA	NA	0.207	NA	NA	0.0305568
CRHR1	1	0	1	0	0	NA	0.122119563498358	NA	NA	NA	1.89175541377678e-37	NA	NA	NA	0.184	NA	NA	0.0305299
ICA1L	1	0	1	0	0	NA	0.121972018394009	NA	NA	NA	5.13308069966844e-24	NA	NA	NA	0.276	NA	NA	0.030493
NNAT	1	0	0	1	0	NA	NA	0.121240775055355	NA	NA	NA	0.000212352257716484	NA	NA	NA	0.787	NA	0.0303102
CACUL1	1	0	0	1	0	NA	NA	0.121211376980927	NA	NA	NA	3.16533598990675e-07	NA	NA	NA	0.374	NA	0.0303028
PPP3CA	1	0	0	0	1	NA	NA	NA	0.120863381009741	NA	NA	NA	2.13061190370611e-09	NA	NA	NA	0.965	0.0302158
CHKA	1	0	1	0	0	NA	0.120838729563787	NA	NA	NA	3.6383596496606e-24	NA	NA	NA	0.345	NA	NA	0.0302097
LYST	1	0	0	1	0	NA	NA	0.12039025199362	NA	NA	NA	6.49807442117814e-08	NA	NA	NA	0.28	NA	0.0300976
ADNP	1	0	1	0	0	NA	0.120372629396724	NA	NA	NA	9.8618915944092e-19	NA	NA	NA	0.427	NA	NA	0.0300932
CAMK2B	1	0	0	0	1	NA	NA	NA	0.120243779015306	NA	NA	NA	1.76176667557963e-08	NA	NA	NA	0.927	0.0300609
ACYP2	1	0	0	1	0	NA	NA	0.120218457979019	NA	NA	NA	2.09447274535923e-06	NA	NA	NA	0.685	NA	0.0300546
HS2ST1	1	0	0	1	0	NA	NA	0.120045813935064	NA	NA	NA	2.17469445730172e-08	NA	NA	NA	0.427	NA	0.0300115
TMEM132E	1	0	1	0	0	NA	0.119814141697803	NA	NA	NA	6.27814621132106e-40	NA	NA	NA	0.177	NA	NA	0.0299535
HOPX	1	1	0	0	0	0.119725563419808	NA	NA	NA	1.43731722085972e-13	NA	NA	NA	0.99	NA	NA	NA	0.0299314
DNAL1	1	0	0	1	0	NA	NA	0.11952651766664	NA	NA	NA	1.79867592136887e-07	NA	NA	NA	0.388	NA	0.0298816
IFT20	1	0	1	0	0	NA	0.119423691854272	NA	NA	NA	1.07156183758051e-25	NA	NA	NA	0.305	NA	NA	0.0298559
PACRGL	1	0	0	1	0	NA	NA	0.119376102500172	NA	NA	NA	1.40457408807147e-08	NA	NA	NA	0.262	NA	0.029844
ATXN2	1	0	0	1	0	NA	NA	0.119363537586687	NA	NA	NA	2.43223248840924e-09	NA	NA	NA	0.493	NA	0.0298409
TMEM243	1	0	0	1	0	NA	NA	0.11915499719707	NA	NA	NA	1.99803292881255e-10	NA	NA	NA	0.217	NA	0.0297887
CHD8	1	0	1	0	0	NA	0.119116699439534	NA	NA	NA	1.7604868056791e-24	NA	NA	NA	0.302	NA	NA	0.0297792
CNTN5	1	0	1	0	0	NA	0.118944461562662	NA	NA	NA	2.22591060791474e-37	NA	NA	NA	0.184	NA	NA	0.0297361
CFAP44	1	0	1	0	0	NA	0.118823134903463	NA	NA	NA	1.80690926720483e-35	NA	NA	NA	0.201	NA	NA	0.0297058
GGA2	1	0	1	0	0	NA	0.118650686028875	NA	NA	NA	4.54166337351277e-23	NA	NA	NA	0.329	NA	NA	0.0296627
LINC00461	1	0	0	1	0	NA	NA	0.118620436362669	NA	NA	NA	1.72659163500967e-06	NA	NA	NA	0.343	NA	0.0296551
RRAGD	1	0	1	0	0	NA	0.118525961091744	NA	NA	NA	1.57279622598738e-28	NA	NA	NA	0.275	NA	NA	0.0296315
RNASEH2B	1	0	1	0	0	NA	0.118480791204564	NA	NA	NA	1.70689900559135e-28	NA	NA	NA	0.249	NA	NA	0.0296202
TRIM33	1	0	1	0	0	NA	0.118256954594406	NA	NA	NA	1.25175822385829e-23	NA	NA	NA	0.263	NA	NA	0.0295642
SUMO2	1	0	1	0	0	NA	0.118250275676986	NA	NA	NA	3.86714046591607e-14	NA	NA	NA	0.823	NA	NA	0.0295626
MEG3	1	1	0	0	0	0.118153654222267	NA	NA	NA	1.07841147845225e-15	NA	NA	NA	0.994	NA	NA	NA	0.0295384
ANKRD28	1	0	1	0	0	NA	0.118128166459908	NA	NA	NA	3.1684743674865e-28	NA	NA	NA	0.265	NA	NA	0.029532
NKTR	1	0	1	0	0	NA	0.118036120814408	NA	NA	NA	4.19033321394505e-25	NA	NA	NA	0.337	NA	NA	0.029509
SRRM1	1	0	1	0	0	NA	0.117973360400746	NA	NA	NA	1.77380523507823e-25	NA	NA	NA	0.321	NA	NA	0.0294933
SPEG	1	0	0	1	0	NA	NA	0.117809657639395	NA	NA	NA	2.94545905966023e-09	NA	NA	NA	0.364	NA	0.0294524
AL691432.2	1	0	1	0	0	NA	0.117794247947654	NA	NA	NA	4.84374769792472e-25	NA	NA	NA	0.263	NA	NA	0.0294486
MTCL1	1	0	1	0	0	NA	0.117750749871942	NA	NA	NA	1.16647870116555e-24	NA	NA	NA	0.252	NA	NA	0.0294377
MYO1B	1	0	1	0	0	NA	0.117742352922974	NA	NA	NA	2.87788399260119e-31	NA	NA	NA	0.204	NA	NA	0.0294356
GFOD2	1	0	1	0	0	NA	0.117715538054257	NA	NA	NA	1.41205422172681e-25	NA	NA	NA	0.271	NA	NA	0.0294289
PWWP2B	1	0	1	0	0	NA	0.11763052891834	NA	NA	NA	1.12680610863032e-30	NA	NA	NA	0.196	NA	NA	0.0294076
KCNJ6	1	0	1	0	0	NA	0.117574220367537	NA	NA	NA	6.57830565267949e-33	NA	NA	NA	0.194	NA	NA	0.0293936
NUDCD3	1	0	1	0	0	NA	0.117482288346619	NA	NA	NA	1.81637063466335e-16	NA	NA	NA	0.799	NA	NA	0.0293706
TIA1	1	0	1	0	0	NA	0.117405610104982	NA	NA	NA	5.53084181365516e-20	NA	NA	NA	0.351	NA	NA	0.0293514
ATP5MD	1	0	0	1	0	NA	NA	0.117380995318972	NA	NA	NA	8.36200596989136e-08	NA	NA	NA	0.993	NA	0.0293452
TMA7	1	0	0	1	0	NA	NA	0.117261033243319	NA	NA	NA	1.44456520070717e-06	NA	NA	NA	0.979	NA	0.0293153
ARFGAP3	1	0	0	1	0	NA	NA	0.117173737701391	NA	NA	NA	9.87368901134957e-10	NA	NA	NA	0.357	NA	0.0292934
PDE7B	1	0	1	0	0	NA	0.117107148897112	NA	NA	NA	3.91828852094966e-30	NA	NA	NA	0.191	NA	NA	0.0292768
TGFBR3	1	0	0	1	0	NA	NA	0.117066090913141	NA	NA	NA	8.58221113660457e-12	NA	NA	NA	0.199	NA	0.0292665
RTL10	1	0	1	0	0	NA	0.11706087679573	NA	NA	NA	1.56806236783475e-24	NA	NA	NA	0.253	NA	NA	0.0292652
TMPO	1	0	0	1	0	NA	NA	0.116954621365391	NA	NA	NA	3.03429961553769e-08	NA	NA	NA	0.364	NA	0.0292387
ZBTB22	1	0	0	1	0	NA	NA	0.116933183989325	NA	NA	NA	1.30559002877551e-09	NA	NA	NA	0.245	NA	0.0292333
PER1	1	0	1	0	0	NA	0.116922600280426	NA	NA	NA	7.69311766950408e-21	NA	NA	NA	0.403	NA	NA	0.0292307
GARNL3	1	0	1	0	0	NA	0.116811799442266	NA	NA	NA	1.25170620464849e-24	NA	NA	NA	0.262	NA	NA	0.0292029
DGCR9	1	0	1	0	0	NA	0.11681131113467	NA	NA	NA	1.48430234578013e-22	NA	NA	NA	0.265	NA	NA	0.0292028
GNAS	1	0	0	0	1	NA	NA	NA	0.116716189337124	NA	NA	NA	2.7049554762907e-17	NA	NA	NA	1	0.029179
DOCK10	1	0	0	0	1	NA	NA	NA	0.116616767661898	NA	NA	NA	2.32288448466671e-16	NA	NA	NA	0.302	0.0291542
TAOK3	1	0	1	0	0	NA	0.116526192541224	NA	NA	NA	9.9875931225313e-21	NA	NA	NA	0.319	NA	NA	0.0291315
KRBOX4	1	0	1	0	0	NA	0.116502661309039	NA	NA	NA	1.64502832842095e-27	NA	NA	NA	0.233	NA	NA	0.0291257
WDR60	1	0	0	1	0	NA	NA	0.116484477423322	NA	NA	NA	1.4218595927159e-06	NA	NA	NA	0.336	NA	0.0291211
RGS7	1	0	0	1	0	NA	NA	0.116399931017715	NA	NA	NA	2.54044647182102e-07	NA	NA	NA	0.437	NA	0.0291
ZC3H12B	1	0	0	1	0	NA	NA	0.116350263541458	NA	NA	NA	1.4382286314722e-09	NA	NA	NA	0.245	NA	0.0290876
AC124798.1	1	0	1	0	0	NA	0.116243040414953	NA	NA	NA	1.19219501181949e-28	NA	NA	NA	0.219	NA	NA	0.0290608
PEF1	1	0	0	1	0	NA	NA	0.115892492876563	NA	NA	NA	3.03816763346384e-06	NA	NA	NA	0.563	NA	0.0289731
ZC3H8	1	0	1	0	0	NA	0.115726945393783	NA	NA	NA	1.37419742049124e-27	NA	NA	NA	0.213	NA	NA	0.0289317
WDR26	1	0	1	0	0	NA	0.115581629911457	NA	NA	NA	1.95744772759256e-23	NA	NA	NA	0.341	NA	NA	0.0288954
RTL8A	1	0	1	0	0	NA	0.115428373469907	NA	NA	NA	2.63171373436342e-24	NA	NA	NA	0.403	NA	NA	0.0288571
WDR54	1	0	1	0	0	NA	0.115365009795156	NA	NA	NA	3.88740624021922e-26	NA	NA	NA	0.269	NA	NA	0.0288413
ZC3H14	1	0	1	0	0	NA	0.115228906366543	NA	NA	NA	2.16135949478929e-23	NA	NA	NA	0.321	NA	NA	0.0288072
PNRC2	1	0	1	0	0	NA	0.115157006612497	NA	NA	NA	4.56352298095457e-23	NA	NA	NA	0.439	NA	NA	0.0287893
PKDCC	1	0	1	0	0	NA	0.115147607667387	NA	NA	NA	4.07262742878757e-29	NA	NA	NA	0.212	NA	NA	0.0287869
MRPL13	1	0	0	1	0	NA	NA	0.115079268161238	NA	NA	NA	2.56285086887254e-07	NA	NA	NA	0.276	NA	0.0287698
NPIPA1	1	0	0	1	0	NA	NA	0.114978392794712	NA	NA	NA	3.83953038996548e-08	NA	NA	NA	0.371	NA	0.0287446
JMJD1C	1	0	1	0	0	NA	0.114957985546705	NA	NA	NA	5.23538337362658e-23	NA	NA	NA	0.266	NA	NA	0.0287395
PTPN13	1	0	1	0	0	NA	0.114726530852927	NA	NA	NA	6.83821169921797e-28	NA	NA	NA	0.229	NA	NA	0.0286816
GRINA	1	0	0	1	0	NA	NA	0.114711477781982	NA	NA	NA	1.30011652949824e-05	NA	NA	NA	0.881	NA	0.0286779
LTBP4	1	0	1	0	0	NA	0.114542148073757	NA	NA	NA	6.49274517938343e-26	NA	NA	NA	0.222	NA	NA	0.0286355
DACT2	1	0	1	0	0	NA	0.114509493413117	NA	NA	NA	1.69405440208295e-39	NA	NA	NA	0.167	NA	NA	0.0286274
NOL9	1	0	1	0	0	NA	0.114481674566174	NA	NA	NA	3.1223167197138e-24	NA	NA	NA	0.245	NA	NA	0.0286204
DTX1	1	0	0	1	0	NA	NA	0.114347099864514	NA	NA	NA	5.55666268435591e-09	NA	NA	NA	0.322	NA	0.0285868
OSBPL6	1	0	1	0	0	NA	0.114296630004849	NA	NA	NA	2.38529199248393e-23	NA	NA	NA	0.275	NA	NA	0.0285742
MED15	1	0	1	0	0	NA	0.11429517456254	NA	NA	NA	6.99695693428128e-23	NA	NA	NA	0.422	NA	NA	0.0285738
XRN2	1	0	1	0	0	NA	0.114056679909447	NA	NA	NA	3.42415326783731e-22	NA	NA	NA	0.259	NA	NA	0.0285142
EML6	1	0	1	0	0	NA	0.113871316636919	NA	NA	NA	2.79882096227314e-25	NA	NA	NA	0.199	NA	NA	0.0284678
SEPHS1	1	0	0	1	0	NA	NA	0.11386804474285	NA	NA	NA	4.58493337913794e-05	NA	NA	NA	0.315	NA	0.028467
SNHG21	1	0	1	0	0	NA	0.113782680092683	NA	NA	NA	3.76693468314755e-32	NA	NA	NA	0.18	NA	NA	0.0284457
CYP1B1	1	0	1	0	0	NA	0.113716530287872	NA	NA	NA	1.89013232590417e-34	NA	NA	NA	0.177	NA	NA	0.0284291
PEX1	1	0	1	0	0	NA	0.113608289333333	NA	NA	NA	1.25989919039173e-29	NA	NA	NA	0.204	NA	NA	0.0284021
PHLPP2	1	0	1	0	0	NA	0.113463515674928	NA	NA	NA	1.41220573840202e-19	NA	NA	NA	0.265	NA	NA	0.0283659
NIF3L1	1	0	1	0	0	NA	0.113406153144711	NA	NA	NA	4.35430256529862e-24	NA	NA	NA	0.245	NA	NA	0.0283515
WDR61	1	0	0	1	0	NA	NA	0.113396362024179	NA	NA	NA	3.0036856516166e-08	NA	NA	NA	0.441	NA	0.0283491
SLMAP	1	0	1	0	0	NA	0.113278724026985	NA	NA	NA	1.8629638591333e-23	NA	NA	NA	0.276	NA	NA	0.0283197
CWC15	1	0	0	1	0	NA	NA	0.113203232602725	NA	NA	NA	7.5252851296551e-06	NA	NA	NA	0.514	NA	0.0283008
BET1L	1	0	0	1	0	NA	NA	0.113158849256751	NA	NA	NA	1.00377825520293e-09	NA	NA	NA	0.28	NA	0.0282897
DDX25	1	0	1	0	0	NA	0.113032388270104	NA	NA	NA	1.60298791332008e-19	NA	NA	NA	0.269	NA	NA	0.0282581
B4GALT7	1	0	0	1	0	NA	NA	0.113030109567501	NA	NA	NA	3.11071865674313e-07	NA	NA	NA	0.322	NA	0.0282575
ANAPC5	1	0	1	0	0	NA	0.113019592587002	NA	NA	NA	8.05644541670721e-19	NA	NA	NA	0.538	NA	NA	0.0282549
SNHG10	1	0	1	0	0	NA	0.112895655644595	NA	NA	NA	3.65558634724478e-29	NA	NA	NA	0.245	NA	NA	0.0282239
SLC12A5	1	0	0	0	1	NA	NA	NA	0.112816257728985	NA	NA	NA	4.6230019705554e-07	NA	NA	NA	0.896	0.0282041
EDNRB	1	0	0	0	1	NA	NA	NA	0.112751352742731	NA	NA	NA	3.20162372312955e-10	NA	NA	NA	0.34	0.0281878
OLFM1	1	1	0	0	0	0.112744876813692	NA	NA	NA	9.37952903385825e-17	NA	NA	NA	1	NA	NA	NA	0.0281862
AGK	1	0	0	1	0	NA	NA	0.112660255991676	NA	NA	NA	6.63183719260535e-10	NA	NA	NA	0.322	NA	0.0281651
RTRAF	1	0	1	0	0	NA	0.112565372433306	NA	NA	NA	4.39875089788767e-18	NA	NA	NA	0.419	NA	NA	0.0281413
SART1	1	0	1	0	0	NA	0.11251252266244	NA	NA	NA	9.46694294502019e-24	NA	NA	NA	0.279	NA	NA	0.0281281
HNRNPDL	1	0	1	0	0	NA	0.112224741425524	NA	NA	NA	2.25488135444268e-18	NA	NA	NA	0.919	NA	NA	0.0280562
AC015813.1	1	0	0	1	0	NA	NA	0.112051885511088	NA	NA	NA	1.80984042178135e-09	NA	NA	NA	0.269	NA	0.028013
CHM	1	0	1	0	0	NA	0.112022600259258	NA	NA	NA	1.91616723593987e-23	NA	NA	NA	0.26	NA	NA	0.0280057
TPT1-AS1	1	0	0	1	0	NA	NA	0.111986127795368	NA	NA	NA	9.29860104054072e-09	NA	NA	NA	0.301	NA	0.0279965
OTUD1	1	0	1	0	0	NA	0.111913536101645	NA	NA	NA	4.54942483729974e-26	NA	NA	NA	0.217	NA	NA	0.0279784
RBM33	1	0	1	0	0	NA	0.111838320465016	NA	NA	NA	1.07892331613923e-19	NA	NA	NA	0.296	NA	NA	0.0279596
ZNF593	1	0	0	1	0	NA	NA	0.111828264046561	NA	NA	NA	1.41107559368299e-10	NA	NA	NA	0.266	NA	0.0279571
AVL9	1	0	0	1	0	NA	NA	0.11166444417638	NA	NA	NA	9.40651972105417e-06	NA	NA	NA	0.441	NA	0.0279161
SUGT1	1	0	1	0	0	NA	0.111563591463402	NA	NA	NA	8.45915337225735e-22	NA	NA	NA	0.453	NA	NA	0.0278909
COL5A3	1	0	1	0	0	NA	0.111545983773301	NA	NA	NA	1.95838296444765e-21	NA	NA	NA	0.305	NA	NA	0.0278865
SEMA3D	1	0	0	1	0	NA	NA	0.111350967931695	NA	NA	NA	1.59754260482889e-08	NA	NA	NA	0.259	NA	0.0278377
HIPK3	1	0	1	0	0	NA	0.111144251498352	NA	NA	NA	3.56124333106344e-20	NA	NA	NA	0.36	NA	NA	0.0277861
NIN	1	0	1	0	0	NA	0.11112772298253	NA	NA	NA	6.91857943952028e-22	NA	NA	NA	0.278	NA	NA	0.0277819
TMEM121	1	0	1	0	0	NA	0.11110994088436	NA	NA	NA	1.05742428705657e-24	NA	NA	NA	0.243	NA	NA	0.0277775
KAT14	1	0	0	1	0	NA	NA	0.111078232883994	NA	NA	NA	1.09046237981606e-06	NA	NA	NA	0.304	NA	0.0277696
PTCH1	1	0	0	1	0	NA	NA	0.111001811366273	NA	NA	NA	9.10760660458633e-08	NA	NA	NA	0.332	NA	0.0277505
MCM3AP	1	0	1	0	0	NA	0.11092245526481	NA	NA	NA	6.83492120670911e-19	NA	NA	NA	0.315	NA	NA	0.0277306
SLC12A6	1	0	1	0	0	NA	0.11087167909462	NA	NA	NA	1.03277730911575e-19	NA	NA	NA	0.235	NA	NA	0.0277179
PXYLP1	1	0	1	0	0	NA	0.11064921948796	NA	NA	NA	3.44857053565739e-28	NA	NA	NA	0.21	NA	NA	0.0276623
EEPD1	1	0	1	0	0	NA	0.110568287192216	NA	NA	NA	1.02395850541793e-30	NA	NA	NA	0.187	NA	NA	0.0276421
FAM50B	1	0	1	0	0	NA	0.110542063530605	NA	NA	NA	2.24510425378281e-21	NA	NA	NA	0.26	NA	NA	0.0276355
RASGEF1B	1	0	0	1	0	NA	NA	0.110504682257775	NA	NA	NA	2.70287923811267e-10	NA	NA	NA	0.224	NA	0.0276262
SEC13	1	0	0	1	0	NA	NA	0.110465697298522	NA	NA	NA	7.78390827087666e-07	NA	NA	NA	0.388	NA	0.0276164
DNAJC15	1	0	0	1	0	NA	NA	0.110403357878169	NA	NA	NA	2.75827687937097e-07	NA	NA	NA	0.402	NA	0.0276008
ZNF532	1	0	1	0	0	NA	0.110336463721261	NA	NA	NA	4.86253674539083e-21	NA	NA	NA	0.271	NA	NA	0.0275841
FAM207A	1	0	0	1	0	NA	NA	0.11032021162386	NA	NA	NA	1.64087517332396e-09	NA	NA	NA	0.234	NA	0.0275801
PIH1D1	1	0	1	0	0	NA	0.110239611586479	NA	NA	NA	4.9516351187742e-20	NA	NA	NA	0.322	NA	NA	0.0275599
SNRPA	1	0	1	0	0	NA	0.110206887963062	NA	NA	NA	3.92926049721914e-21	NA	NA	NA	0.315	NA	NA	0.0275517
ZSCAN31	1	0	1	0	0	NA	0.110200729242233	NA	NA	NA	4.86398317488806e-26	NA	NA	NA	0.197	NA	NA	0.0275502
COPS3	1	0	0	1	0	NA	NA	0.110116372655939	NA	NA	NA	3.35640939151673e-07	NA	NA	NA	0.479	NA	0.0275291
RSBN1L	1	0	1	0	0	NA	0.110056888585818	NA	NA	NA	6.19667813576723e-26	NA	NA	NA	0.249	NA	NA	0.0275142
BRICD5	1	0	1	0	0	NA	0.109968899189507	NA	NA	NA	4.79001398244818e-26	NA	NA	NA	0.233	NA	NA	0.0274922
NOP58	1	0	1	0	0	NA	0.109967915322709	NA	NA	NA	8.07922505969951e-22	NA	NA	NA	0.289	NA	NA	0.027492
AMER3	1	0	0	1	0	NA	NA	0.109960465442687	NA	NA	NA	2.71007481402001e-10	NA	NA	NA	0.266	NA	0.0274901
ZNF512	1	0	1	0	0	NA	0.109855235575464	NA	NA	NA	1.74707058548454e-23	NA	NA	NA	0.265	NA	NA	0.0274638
TNKS1BP1	1	0	0	1	0	NA	NA	0.10983606431493	NA	NA	NA	1.22023705903733e-07	NA	NA	NA	0.276	NA	0.027459
DCAF4	1	0	0	1	0	NA	NA	0.109675122750383	NA	NA	NA	9.22685878618e-10	NA	NA	NA	0.196	NA	0.0274188
TSNAX	1	0	1	0	0	NA	0.109654410667416	NA	NA	NA	2.30092966989024e-18	NA	NA	NA	0.308	NA	NA	0.0274136
SLC27A3	1	0	0	1	0	NA	NA	0.109554219594968	NA	NA	NA	4.11713836477862e-12	NA	NA	NA	0.199	NA	0.0273886
CDKN2AIPNL	1	0	1	0	0	NA	0.109531998025376	NA	NA	NA	1.52016741941523e-24	NA	NA	NA	0.265	NA	NA	0.027383
CTDSPL	1	0	1	0	0	NA	0.109502284493534	NA	NA	NA	2.37149953298765e-20	NA	NA	NA	0.242	NA	NA	0.0273756
IGF1R	1	0	1	0	0	NA	0.109443544035214	NA	NA	NA	4.85005046729166e-19	NA	NA	NA	0.328	NA	NA	0.0273609
FBXW2	1	0	1	0	0	NA	0.109405291810843	NA	NA	NA	9.95046294428418e-19	NA	NA	NA	0.282	NA	NA	0.0273513
APEH	1	0	0	1	0	NA	NA	0.109354467857177	NA	NA	NA	8.97716363643491e-06	NA	NA	NA	0.441	NA	0.0273386
CACNA2D3	1	0	0	1	0	NA	NA	0.109329899945325	NA	NA	NA	1.46616567510688e-08	NA	NA	NA	0.367	NA	0.0273325
PHF14	1	0	1	0	0	NA	0.109268606195585	NA	NA	NA	1.57416022253471e-19	NA	NA	NA	0.328	NA	NA	0.0273172
WDR19	1	0	1	0	0	NA	0.109107907239359	NA	NA	NA	4.26947243194599e-24	NA	NA	NA	0.23	NA	NA	0.027277
NUDT9	1	0	1	0	0	NA	0.109104579984604	NA	NA	NA	3.37863193205234e-18	NA	NA	NA	0.318	NA	NA	0.0272761
MBLAC2	1	0	1	0	0	NA	0.109044793383547	NA	NA	NA	9.59192811516448e-32	NA	NA	NA	0.203	NA	NA	0.0272612
GOPC	1	0	0	1	0	NA	NA	0.109000417875784	NA	NA	NA	2.93957586269438e-07	NA	NA	NA	0.493	NA	0.0272501
CHST2	1	0	0	0	1	NA	NA	NA	0.108987815757618	NA	NA	NA	1.61549793200096e-10	NA	NA	NA	0.305	0.027247
PHF20	1	0	1	0	0	NA	0.108829037323783	NA	NA	NA	5.51386228691895e-17	NA	NA	NA	0.318	NA	NA	0.0272073
CLU	1	0	0	0	1	NA	NA	NA	0.108810025437526	NA	NA	NA	3.17416991635204e-21	NA	NA	NA	1	0.0272025
PSEN2	1	0	0	1	0	NA	NA	0.108788086613528	NA	NA	NA	2.08641679031558e-09	NA	NA	NA	0.259	NA	0.027197
SHANK3	1	0	0	0	1	NA	NA	NA	0.108759892706394	NA	NA	NA	1.4350173167964e-06	NA	NA	NA	0.569	0.02719
KDM5B	1	0	1	0	0	NA	0.108694652362048	NA	NA	NA	8.39292221268946e-22	NA	NA	NA	0.304	NA	NA	0.0271737
YIPF6	1	0	0	1	0	NA	NA	0.108663578639782	NA	NA	NA	3.5388839325792e-09	NA	NA	NA	0.43	NA	0.0271659
NECTIN3	1	0	1	0	0	NA	0.10865977817069	NA	NA	NA	1.73436489583576e-32	NA	NA	NA	0.168	NA	NA	0.0271649
ZNF787	1	0	1	0	0	NA	0.108622399883733	NA	NA	NA	6.51000646657951e-24	NA	NA	NA	0.227	NA	NA	0.0271556
FBXL5	1	0	1	0	0	NA	0.108600590813092	NA	NA	NA	7.2150947673875e-19	NA	NA	NA	0.46	NA	NA	0.0271501
SNTB2	1	0	1	0	0	NA	0.108583879722777	NA	NA	NA	4.32556247435632e-26	NA	NA	NA	0.212	NA	NA	0.027146
REV1	1	0	1	0	0	NA	0.108508697946804	NA	NA	NA	9.22239759292364e-21	NA	NA	NA	0.21	NA	NA	0.0271272
PAX8-AS1	1	0	1	0	0	NA	0.108480781624846	NA	NA	NA	4.42910991676287e-24	NA	NA	NA	0.279	NA	NA	0.0271202
EIF3D	1	0	1	0	0	NA	0.108324511462886	NA	NA	NA	3.23817595560113e-20	NA	NA	NA	0.351	NA	NA	0.0270811
TAF15	1	0	1	0	0	NA	0.108311479605642	NA	NA	NA	1.63436407899324e-19	NA	NA	NA	0.294	NA	NA	0.0270779
WWC1	1	0	0	1	0	NA	NA	0.108249588938692	NA	NA	NA	1.40696309737735e-08	NA	NA	NA	0.385	NA	0.0270624
VEGFA	1	0	0	0	1	NA	NA	NA	0.108196453272319	NA	NA	NA	1.80329423150345e-11	NA	NA	NA	0.335	0.0270491
RNF5	1	0	0	1	0	NA	NA	0.108132111562297	NA	NA	NA	4.52280653732638e-08	NA	NA	NA	0.549	NA	0.027033
ADAM17	1	0	1	0	0	NA	0.108101835847451	NA	NA	NA	8.74379209721599e-26	NA	NA	NA	0.239	NA	NA	0.0270255
ELMSAN1	1	0	1	0	0	NA	0.108101835847451	NA	NA	NA	5.13100513194985e-24	NA	NA	NA	0.235	NA	NA	0.0270255
CDC42EP3	1	0	1	0	0	NA	0.108081843692372	NA	NA	NA	6.61621829036485e-29	NA	NA	NA	0.199	NA	NA	0.0270205
CCDC85C	1	0	0	1	0	NA	NA	0.107990340730036	NA	NA	NA	3.94336228170713e-07	NA	NA	NA	0.294	NA	0.0269976
UBAP1L	1	0	1	0	0	NA	0.107973671797292	NA	NA	NA	6.26680873498609e-26	NA	NA	NA	0.204	NA	NA	0.0269934
MCCC2	1	0	1	0	0	NA	0.107969032319511	NA	NA	NA	1.23178552398028e-22	NA	NA	NA	0.26	NA	NA	0.0269923
TMEM18	1	0	1	0	0	NA	0.107899775962674	NA	NA	NA	2.75883676084663e-24	NA	NA	NA	0.266	NA	NA	0.0269749
DPM1	1	0	1	0	0	NA	0.107883627135078	NA	NA	NA	2.39893315620589e-20	NA	NA	NA	0.286	NA	NA	0.0269709
ZNF74	1	0	1	0	0	NA	0.107879016107293	NA	NA	NA	1.17230838142952e-30	NA	NA	NA	0.184	NA	NA	0.0269698
SNRPA1	1	0	1	0	0	NA	0.107619736475276	NA	NA	NA	2.74776212251983e-19	NA	NA	NA	0.305	NA	NA	0.0269049
MED27	1	0	1	0	0	NA	0.107555920265938	NA	NA	NA	9.35255942026264e-27	NA	NA	NA	0.212	NA	NA	0.026889
KANTR	1	0	1	0	0	NA	0.107485379914749	NA	NA	NA	1.99598333501355e-25	NA	NA	NA	0.214	NA	NA	0.0268713
INSYN1	1	0	0	1	0	NA	NA	0.10743569027344	NA	NA	NA	2.60366683443993e-07	NA	NA	NA	0.409	NA	0.0268589
PES1	1	0	0	1	0	NA	NA	0.107416976811072	NA	NA	NA	1.24728881599333e-08	NA	NA	NA	0.322	NA	0.0268542
MICU2	1	0	1	0	0	NA	0.107367495015803	NA	NA	NA	6.85725348663679e-19	NA	NA	NA	0.288	NA	NA	0.0268419
MAP3K2	1	0	1	0	0	NA	0.107316594624223	NA	NA	NA	1.15404177826084e-23	NA	NA	NA	0.23	NA	NA	0.0268291
CLK2	1	0	1	0	0	NA	0.107248555000393	NA	NA	NA	1.64465068524505e-22	NA	NA	NA	0.237	NA	NA	0.0268121
PLCB4	1	0	1	0	0	NA	0.107217592034656	NA	NA	NA	3.97391103746581e-28	NA	NA	NA	0.184	NA	NA	0.0268044
USP24	1	0	1	0	0	NA	0.1071731664645	NA	NA	NA	1.49776735052694e-21	NA	NA	NA	0.262	NA	NA	0.0267933
HOOK3	1	0	0	1	0	NA	NA	0.107154129685899	NA	NA	NA	1.83511124032679e-07	NA	NA	NA	0.43	NA	0.0267885
NOL4	1	0	0	1	0	NA	NA	0.107112757944983	NA	NA	NA	1.60308415453985e-06	NA	NA	NA	0.325	NA	0.0267782
RPS6KA3	1	0	1	0	0	NA	0.107081957489473	NA	NA	NA	4.15165258217906e-22	NA	NA	NA	0.226	NA	NA	0.0267705
RPS6KC1	1	0	1	0	0	NA	0.107069837819855	NA	NA	NA	2.05991304282862e-17	NA	NA	NA	0.247	NA	NA	0.0267675
UBTF	1	0	1	0	0	NA	0.10701432457386	NA	NA	NA	6.62232499188612e-21	NA	NA	NA	0.378	NA	NA	0.0267536
LCNL1	1	0	1	0	0	NA	0.106942905577899	NA	NA	NA	2.22451832544727e-29	NA	NA	NA	0.181	NA	NA	0.0267357
RAB8B	1	0	1	0	0	NA	0.106917617451305	NA	NA	NA	2.08387129204132e-19	NA	NA	NA	0.256	NA	NA	0.0267294
AHDC1	1	0	1	0	0	NA	0.10685155558578	NA	NA	NA	2.02496704780429e-17	NA	NA	NA	0.279	NA	NA	0.0267129
LINC01551	1	0	0	1	0	NA	NA	0.106780812525307	NA	NA	NA	5.6013583422791e-07	NA	NA	NA	0.234	NA	0.0266952
SETD2	1	0	1	0	0	NA	0.106659555256885	NA	NA	NA	5.94444216715936e-23	NA	NA	NA	0.239	NA	NA	0.0266649
SNAP29	1	0	0	1	0	NA	NA	0.106455376438082	NA	NA	NA	8.8162828558116e-08	NA	NA	NA	0.346	NA	0.0266138
CDK20	1	0	1	0	0	NA	0.106374585220106	NA	NA	NA	1.61856736972921e-23	NA	NA	NA	0.209	NA	NA	0.0265936
LRPAP1	1	0	0	1	0	NA	NA	0.106124954941158	NA	NA	NA	0.000160109772669234	NA	NA	NA	0.818	NA	0.0265312
CFAP410	1	0	1	0	0	NA	0.105990428381995	NA	NA	NA	7.5002177821887e-22	NA	NA	NA	0.255	NA	NA	0.0264976
UHRF1BP1L	1	0	1	0	0	NA	0.105956464967739	NA	NA	NA	1.05172798371377e-21	NA	NA	NA	0.222	NA	NA	0.0264891
BLVRA	1	0	0	1	0	NA	NA	0.105928981036208	NA	NA	NA	5.67316470108356e-06	NA	NA	NA	0.336	NA	0.0264822
CHD4	1	0	0	1	0	NA	NA	0.105860229788828	NA	NA	NA	1.04621012958167e-06	NA	NA	NA	0.608	NA	0.0264651
MAP3K7	1	0	1	0	0	NA	0.105692576065182	NA	NA	NA	2.42410756639686e-19	NA	NA	NA	0.269	NA	NA	0.0264231
PEX6	1	0	0	1	0	NA	NA	0.105565500804029	NA	NA	NA	4.85455990768455e-06	NA	NA	NA	0.395	NA	0.0263914
CALU	1	0	1	0	0	NA	0.105507579302098	NA	NA	NA	7.55225054074625e-17	NA	NA	NA	0.306	NA	NA	0.0263769
MKNK1	1	0	0	1	0	NA	NA	0.105422588691446	NA	NA	NA	2.3014402698319e-07	NA	NA	NA	0.388	NA	0.0263556
RMND5B	1	0	1	0	0	NA	0.10539982077971	NA	NA	NA	1.47820716022276e-22	NA	NA	NA	0.269	NA	NA	0.02635
PUS1	1	0	1	0	0	NA	0.105336183340001	NA	NA	NA	2.99461417243804e-25	NA	NA	NA	0.206	NA	NA	0.026334
PCNX4	1	0	1	0	0	NA	0.105310554377808	NA	NA	NA	1.31156294399291e-21	NA	NA	NA	0.247	NA	NA	0.0263276
ATAD3A	1	0	1	0	0	NA	0.105198786076984	NA	NA	NA	1.46066045470072e-24	NA	NA	NA	0.224	NA	NA	0.0262997
USP25	1	0	0	1	0	NA	NA	0.105180671784468	NA	NA	NA	1.2396603362881e-06	NA	NA	NA	0.392	NA	0.0262952
SF3A1	1	0	0	1	0	NA	NA	0.105175398604757	NA	NA	NA	6.11072694304499e-06	NA	NA	NA	0.5	NA	0.0262938
TAF6	1	0	0	1	0	NA	NA	0.105144658813247	NA	NA	NA	9.76956004946506e-07	NA	NA	NA	0.49	NA	0.0262862
MFSD5	1	0	0	1	0	NA	NA	0.105082804981109	NA	NA	NA	3.13161740047851e-08	NA	NA	NA	0.28	NA	0.0262707
CITED4	1	0	1	0	0	NA	0.105073839972631	NA	NA	NA	3.57179051915148e-24	NA	NA	NA	0.262	NA	NA	0.0262685
CPNE1	1	0	0	1	0	NA	NA	0.105062838946856	NA	NA	NA	4.37419216711326e-07	NA	NA	NA	0.521	NA	0.0262657
GRB2	1	0	1	0	0	NA	0.105037062436842	NA	NA	NA	1.5458442852228e-13	NA	NA	NA	0.774	NA	NA	0.0262593
SGPP1	1	0	1	0	0	NA	0.105001612950992	NA	NA	NA	7.40171056230022e-18	NA	NA	NA	0.25	NA	NA	0.0262504
POLB	1	0	1	0	0	NA	0.104963620629543	NA	NA	NA	2.36103664577252e-24	NA	NA	NA	0.206	NA	NA	0.0262409
MORC3	1	0	0	1	0	NA	NA	0.104940377663309	NA	NA	NA	1.82703168907597e-09	NA	NA	NA	0.29	NA	0.0262351
SDHD	1	0	0	1	0	NA	NA	0.104925913523528	NA	NA	NA	3.41576600056494e-06	NA	NA	NA	0.486	NA	0.0262315
SLC39A14	1	0	1	0	0	NA	0.104915857661225	NA	NA	NA	2.08433056817924e-19	NA	NA	NA	0.373	NA	NA	0.026229
NDUFS4	1	0	0	1	0	NA	NA	0.104911070628153	NA	NA	NA	6.85136222550215e-08	NA	NA	NA	0.503	NA	0.0262278
PAIP1	1	0	0	1	0	NA	NA	0.104895365870212	NA	NA	NA	4.19264576969274e-06	NA	NA	NA	0.542	NA	0.0262238
CSNK1D	1	0	0	1	0	NA	NA	0.10480920710772	NA	NA	NA	4.4108302953941e-05	NA	NA	NA	0.724	NA	0.0262023
RABGEF1	1	0	0	1	0	NA	NA	0.104807223643858	NA	NA	NA	1.42741392937298e-05	NA	NA	NA	0.374	NA	0.0262018
NT5C2	1	0	1	0	0	NA	0.104788148270864	NA	NA	NA	1.48495930344598e-18	NA	NA	NA	0.331	NA	NA	0.026197
CHST7	1	0	0	1	0	NA	NA	0.10471858986263	NA	NA	NA	2.11908378077111e-09	NA	NA	NA	0.21	NA	0.0261796
NUP93	1	0	1	0	0	NA	0.104677414383678	NA	NA	NA	6.36735813722491e-23	NA	NA	NA	0.236	NA	NA	0.0261694
NPAS2	1	0	1	0	0	NA	0.104675923641929	NA	NA	NA	1.5271212361268e-22	NA	NA	NA	0.272	NA	NA	0.026169
XAB2	1	0	1	0	0	NA	0.10466332524941	NA	NA	NA	2.96823290564366e-20	NA	NA	NA	0.235	NA	NA	0.0261658
DAB2IP	1	0	0	1	0	NA	NA	0.104614083300341	NA	NA	NA	1.18799417384495e-05	NA	NA	NA	0.497	NA	0.0261535
CORO1C	1	0	1	0	0	NA	0.104609031772611	NA	NA	NA	1.22529280076949e-19	NA	NA	NA	0.271	NA	NA	0.0261523
EID2B	1	0	1	0	0	NA	0.104579065185353	NA	NA	NA	9.47357087676776e-23	NA	NA	NA	0.216	NA	NA	0.0261448
ZFPM2	1	0	1	0	0	NA	0.104577982677117	NA	NA	NA	2.88889011942414e-25	NA	NA	NA	0.196	NA	NA	0.0261445
CBFA2T2	1	0	0	1	0	NA	NA	0.104505167502271	NA	NA	NA	5.76903846979619e-07	NA	NA	NA	0.364	NA	0.0261263
EIF4E	1	0	0	1	0	NA	NA	0.104459891555208	NA	NA	NA	3.65364060000971e-06	NA	NA	NA	0.587	NA	0.026115
EPHB1	1	0	1	0	0	NA	0.104457591610443	NA	NA	NA	5.8778016952911e-31	NA	NA	NA	0.161	NA	NA	0.0261144
CTPS1	1	0	1	0	0	NA	0.104451161368849	NA	NA	NA	2.60239426073769e-22	NA	NA	NA	0.206	NA	NA	0.0261128
STIM2	1	0	0	1	0	NA	NA	0.104398901775184	NA	NA	NA	2.26586021845158e-08	NA	NA	NA	0.301	NA	0.0260997
SRPK1	1	0	0	1	0	NA	NA	0.104381249888049	NA	NA	NA	2.72302383699949e-07	NA	NA	NA	0.28	NA	0.0260953
THAP7	1	0	1	0	0	NA	0.104333782495825	NA	NA	NA	5.72954579014308e-20	NA	NA	NA	0.249	NA	NA	0.0260834
ACAP2	1	0	1	0	0	NA	0.104310054044224	NA	NA	NA	1.01054652327742e-20	NA	NA	NA	0.26	NA	NA	0.0260775
PSMA3-AS1	1	0	1	0	0	NA	0.104310054044224	NA	NA	NA	6.84240190616654e-23	NA	NA	NA	0.259	NA	NA	0.0260775
SLC13A5	1	0	0	1	0	NA	NA	0.104181637136124	NA	NA	NA	5.23868648394229e-13	NA	NA	NA	0.161	NA	0.0260454
MRPS24	1	0	0	1	0	NA	NA	0.104156621814238	NA	NA	NA	2.37993970094424e-06	NA	NA	NA	0.615	NA	0.0260392
TRIM11	1	0	1	0	0	NA	0.104115596095143	NA	NA	NA	7.96432668440124e-24	NA	NA	NA	0.224	NA	NA	0.0260289
ARL10	1	0	1	0	0	NA	0.103923879102178	NA	NA	NA	2.7450919041497e-24	NA	NA	NA	0.227	NA	NA	0.025981
SIRT3	1	0	1	0	0	NA	0.103822246389584	NA	NA	NA	2.94438421255692e-16	NA	NA	NA	0.282	NA	NA	0.0259556
MPHOSPH9	1	0	1	0	0	NA	0.103813853642596	NA	NA	NA	7.34366717776135e-26	NA	NA	NA	0.219	NA	NA	0.0259535
RYBP	1	0	1	0	0	NA	0.103758329892298	NA	NA	NA	1.04056359535952e-18	NA	NA	NA	0.271	NA	NA	0.0259396
MKRN2	1	0	1	0	0	NA	0.103659224213246	NA	NA	NA	1.03984401201423e-19	NA	NA	NA	0.259	NA	NA	0.0259148
ERGIC1	1	0	0	1	0	NA	NA	0.103617568304773	NA	NA	NA	1.52693154514755e-07	NA	NA	NA	0.381	NA	0.0259044
AP1G1	1	0	0	1	0	NA	NA	0.103545052285426	NA	NA	NA	4.98119442462005e-07	NA	NA	NA	0.451	NA	0.0258863
C8orf76	1	0	1	0	0	NA	0.103530366131387	NA	NA	NA	2.21625889559963e-25	NA	NA	NA	0.184	NA	NA	0.0258826
CTNNAL1	1	0	1	0	0	NA	0.103530366131387	NA	NA	NA	2.12650418340819e-25	NA	NA	NA	0.186	NA	NA	0.0258826
CRLS1	1	0	1	0	0	NA	0.103504669429558	NA	NA	NA	7.21075902757732e-22	NA	NA	NA	0.286	NA	NA	0.0258762
TAF11	1	0	1	0	0	NA	0.103463238199909	NA	NA	NA	4.11230268877727e-20	NA	NA	NA	0.237	NA	NA	0.0258658
ITGA9	1	0	1	0	0	NA	0.103462694289328	NA	NA	NA	5.15181001036216e-32	NA	NA	NA	0.165	NA	NA	0.0258657
AC067852.2	1	0	0	1	0	NA	NA	0.103445950609007	NA	NA	NA	4.97401049233942e-08	NA	NA	NA	0.234	NA	0.0258615
CCDC12	1	0	1	0	0	NA	0.103377653044273	NA	NA	NA	2.19166713792661e-20	NA	NA	NA	0.322	NA	NA	0.0258444
DDHD1	1	0	1	0	0	NA	0.103371092419177	NA	NA	NA	3.02667047268009e-19	NA	NA	NA	0.243	NA	NA	0.0258428
OPRD1	1	0	0	1	0	NA	NA	0.103356461739539	NA	NA	NA	4.17818323956589e-10	NA	NA	NA	0.21	NA	0.0258391
ENTPD3	1	0	1	0	0	NA	0.103354127072439	NA	NA	NA	1.72933454634382e-22	NA	NA	NA	0.22	NA	NA	0.0258385
ZCCHC17	1	0	0	1	0	NA	NA	0.103242258200991	NA	NA	NA	7.84175262882566e-06	NA	NA	NA	0.629	NA	0.0258106
ISOC2	1	0	0	1	0	NA	NA	0.103118581412653	NA	NA	NA	3.23693476873534e-07	NA	NA	NA	0.378	NA	0.0257796
A1BG	1	0	1	0	0	NA	0.103118567614386	NA	NA	NA	2.74258854636156e-28	NA	NA	NA	0.237	NA	NA	0.0257796
ANKRD13B	1	0	1	0	0	NA	0.103108395372907	NA	NA	NA	1.45965190998144e-21	NA	NA	NA	0.242	NA	NA	0.0257771
ALS2CL	1	0	1	0	0	NA	0.10298797317906	NA	NA	NA	5.21049505947437e-29	NA	NA	NA	0.163	NA	NA	0.025747
CNNM4	1	0	1	0	0	NA	0.102937019582489	NA	NA	NA	8.3827495887427e-30	NA	NA	NA	0.171	NA	NA	0.0257343
MAP7	1	0	0	0	1	NA	NA	NA	0.102936119844574	NA	NA	NA	2.33479817490844e-08	NA	NA	NA	0.453	0.025734
ENPP5	1	0	0	1	0	NA	NA	0.102920280499322	NA	NA	NA	1.7893981006652e-05	NA	NA	NA	0.28	NA	0.0257301
SLC24A3	1	0	1	0	0	NA	0.102832934974441	NA	NA	NA	1.41902355002737e-26	NA	NA	NA	0.184	NA	NA	0.0257082
SIRT1	1	0	1	0	0	NA	0.102741218724199	NA	NA	NA	2.72841499121099e-28	NA	NA	NA	0.186	NA	NA	0.0256853
MAPK3	1	0	1	0	0	NA	0.10270786718813	NA	NA	NA	1.7869547540308e-16	NA	NA	NA	0.832	NA	NA	0.025677
KARS	1	0	1	0	0	NA	0.102680995285268	NA	NA	NA	2.16207551977476e-17	NA	NA	NA	0.314	NA	NA	0.0256702
KDM4B	1	0	1	0	0	NA	0.102671072238496	NA	NA	NA	6.59956286046831e-20	NA	NA	NA	0.237	NA	NA	0.0256678
ZNF777	1	0	1	0	0	NA	0.102649065721882	NA	NA	NA	8.00644943627954e-28	NA	NA	NA	0.183	NA	NA	0.0256623
TBC1D14	1	0	0	1	0	NA	NA	0.10261255334902	NA	NA	NA	1.45773755513061e-06	NA	NA	NA	0.566	NA	0.0256531
NIPBL-DT	1	0	1	0	0	NA	0.102596129857014	NA	NA	NA	3.56608653764173e-26	NA	NA	NA	0.199	NA	NA	0.025649
TIAM1	1	0	0	1	0	NA	NA	0.102556941409122	NA	NA	NA	3.01917258704331e-05	NA	NA	NA	0.507	NA	0.0256392
FAM117A	1	0	0	1	0	NA	NA	0.102457046298905	NA	NA	NA	1.25180463532837e-08	NA	NA	NA	0.199	NA	0.0256143
KCTD6	1	0	0	1	0	NA	NA	0.102356118032606	NA	NA	NA	1.06335626598827e-05	NA	NA	NA	0.276	NA	0.025589
CADM1	1	0	0	0	1	NA	NA	NA	0.102274877294534	NA	NA	NA	8.87456139089137e-07	NA	NA	NA	0.638	0.0255687
INTU	1	0	1	0	0	NA	0.1022288878404	NA	NA	NA	1.59269263199278e-25	NA	NA	NA	0.204	NA	NA	0.0255572
ATP13A3	1	0	1	0	0	NA	0.10209881217954	NA	NA	NA	4.87576018859087e-21	NA	NA	NA	0.26	NA	NA	0.0255247
ATP13A1	1	0	1	0	0	NA	0.102060947626721	NA	NA	NA	4.75751855359261e-19	NA	NA	NA	0.291	NA	NA	0.0255152
OPHN1	1	0	0	1	0	NA	NA	0.10204119686315	NA	NA	NA	5.15577174191529e-06	NA	NA	NA	0.234	NA	0.0255103
ADAM10	1	0	1	0	0	NA	0.101937239399693	NA	NA	NA	5.07039806182558e-19	NA	NA	NA	0.296	NA	NA	0.0254843
LSM8	1	0	1	0	0	NA	0.101920538169432	NA	NA	NA	8.87421230634362e-22	NA	NA	NA	0.246	NA	NA	0.0254801
LRCH2	1	0	1	0	0	NA	0.101899809023054	NA	NA	NA	8.99067397932885e-28	NA	NA	NA	0.174	NA	NA	0.025475
NDUFC2	1	0	0	1	0	NA	NA	0.101878239061907	NA	NA	NA	0.000697207147006883	NA	NA	NA	0.916	NA	0.0254696
NLGN4Y	1	0	1	0	0	NA	0.101822209269015	NA	NA	NA	6.5944645045402e-22	NA	NA	NA	0.216	NA	NA	0.0254556
DHX33	1	0	1	0	0	NA	0.101819806222913	NA	NA	NA	1.44459770968512e-22	NA	NA	NA	0.212	NA	NA	0.025455
AARSD1	1	0	0	0	1	NA	NA	NA	0.101723263419365	NA	NA	NA	2.23449116531428e-09	NA	NA	NA	0.402	0.0254308
PIGG	1	0	1	0	0	NA	0.101691108854597	NA	NA	NA	6.46997262361335e-22	NA	NA	NA	0.222	NA	NA	0.0254228
GTF3C5	1	0	1	0	0	NA	0.101674717695987	NA	NA	NA	7.44104986939927e-19	NA	NA	NA	0.269	NA	NA	0.0254187
MED12L	1	0	1	0	0	NA	0.101600041752211	NA	NA	NA	5.8940023058654e-22	NA	NA	NA	0.219	NA	NA	0.0254
RIPPLY2	1	0	0	1	0	NA	NA	0.10159945378331	NA	NA	NA	1.61335050694087e-08	NA	NA	NA	0.262	NA	0.0253999
ELAVL1	1	0	1	0	0	NA	0.10158403855157	NA	NA	NA	2.4785419817248e-18	NA	NA	NA	0.332	NA	NA	0.025396
RBM27	1	0	1	0	0	NA	0.101546371604145	NA	NA	NA	1.56665907057319e-20	NA	NA	NA	0.199	NA	NA	0.0253866
AKAP9	1	0	1	0	0	NA	0.101520533161219	NA	NA	NA	6.44555437813146e-17	NA	NA	NA	0.345	NA	NA	0.0253801
GPAT2	1	0	1	0	0	NA	0.101507993900733	NA	NA	NA	3.06552001388871e-34	NA	NA	NA	0.148	NA	NA	0.025377
PHIP	1	0	0	1	0	NA	NA	0.101397558854513	NA	NA	NA	6.52571592453958e-06	NA	NA	NA	0.399	NA	0.0253494
SRF	1	0	1	0	0	NA	0.101355143791803	NA	NA	NA	1.36972057667562e-22	NA	NA	NA	0.247	NA	NA	0.0253388
FHOD3	1	0	1	0	0	NA	0.101318969670249	NA	NA	NA	3.8998604550079e-24	NA	NA	NA	0.21	NA	NA	0.0253297
QSOX2	1	0	0	1	0	NA	NA	0.101259911811826	NA	NA	NA	9.53468421738253e-08	NA	NA	NA	0.238	NA	0.025315
HSD17B11	1	0	1	0	0	NA	0.101220712770896	NA	NA	NA	1.28824673138157e-19	NA	NA	NA	0.249	NA	NA	0.0253052
GPR85	1	0	0	1	0	NA	NA	0.101206264397252	NA	NA	NA	3.39509957184675e-06	NA	NA	NA	0.206	NA	0.0253016
MAPKAPK5	1	0	1	0	0	NA	0.101130590091337	NA	NA	NA	2.38100118375249e-22	NA	NA	NA	0.247	NA	NA	0.0252826
SMIM20	1	0	1	0	0	NA	0.101085861235838	NA	NA	NA	1.11220070345641e-17	NA	NA	NA	0.278	NA	NA	0.0252715
SYBU	1	0	0	0	1	NA	NA	NA	0.101075365702474	NA	NA	NA	4.8919424414813e-05	NA	NA	NA	0.717	0.0252688
SERP2	1	0	0	1	0	NA	NA	0.101022753872896	NA	NA	NA	0.000229424576053564	NA	NA	NA	0.601	NA	0.0252557
RPN1	1	0	0	1	0	NA	NA	0.100992995068007	NA	NA	NA	4.14536784044405e-05	NA	NA	NA	0.493	NA	0.0252482
XYLT2	1	0	0	1	0	NA	NA	0.10095981589494	NA	NA	NA	5.5286617247498e-08	NA	NA	NA	0.192	NA	0.02524
COL26A1	1	0	0	1	0	NA	NA	0.100924039988708	NA	NA	NA	2.13602844492197e-08	NA	NA	NA	0.266	NA	0.025231
CSGALNACT2	1	0	0	0	1	NA	NA	NA	0.100868383732535	NA	NA	NA	1.25060612394454e-08	NA	NA	NA	0.378	0.0252171
PIGS	1	0	1	0	0	NA	0.100843846067738	NA	NA	NA	2.3738214911597e-19	NA	NA	NA	0.258	NA	NA	0.025211
KLF5	1	0	0	1	0	NA	NA	0.10071616776463	NA	NA	NA	8.0707019009895e-12	NA	NA	NA	0.147	NA	0.025179
EXOSC5	1	0	1	0	0	NA	0.100561957983552	NA	NA	NA	2.39337467500785e-21	NA	NA	NA	0.214	NA	NA	0.0251405
DDX46	1	0	1	0	0	NA	0.100501771694325	NA	NA	NA	3.38898543493231e-23	NA	NA	NA	0.266	NA	NA	0.0251254
PGAP3	1	0	1	0	0	NA	0.100501247506874	NA	NA	NA	1.74486837782952e-24	NA	NA	NA	0.18	NA	NA	0.0251253
IRS1	1	0	1	0	0	NA	0.100473772152686	NA	NA	NA	4.83128203957587e-26	NA	NA	NA	0.193	NA	NA	0.0251184
DIAPH2	1	0	1	0	0	NA	0.100408179177785	NA	NA	NA	1.30132279764695e-31	NA	NA	NA	0.15	NA	NA	0.025102
LTA4H	1	0	1	0	0	NA	0.100397034387589	NA	NA	NA	1.62800591835018e-17	NA	NA	NA	0.269	NA	NA	0.0250993
INTS8	1	0	1	0	0	NA	0.100394804703081	NA	NA	NA	5.39768883506098e-19	NA	NA	NA	0.214	NA	NA	0.0250987
CLDN12	1	0	1	0	0	NA	0.100344864236693	NA	NA	NA	3.61913000876181e-19	NA	NA	NA	0.246	NA	NA	0.0250862
TACO1	1	0	0	1	0	NA	NA	0.10032396690481	NA	NA	NA	4.85162657098152e-08	NA	NA	NA	0.259	NA	0.025081
PLK5	1	0	1	0	0	NA	0.10031957938448	NA	NA	NA	2.16733864500909e-33	NA	NA	NA	0.157	NA	NA	0.0250799
SLC36A4	1	0	0	1	0	NA	NA	0.100291001619935	NA	NA	NA	8.99707762371145e-08	NA	NA	NA	0.276	NA	0.0250728
MACO1	1	0	1	0	0	NA	0.100275126229006	NA	NA	NA	4.95499761164123e-19	NA	NA	NA	0.253	NA	NA	0.0250688
SLC35B4	1	0	1	0	0	NA	0.100273686809494	NA	NA	NA	1.78322692291182e-19	NA	NA	NA	0.283	NA	NA	0.0250684
BTBD11	1	0	0	1	0	NA	NA	0.100261592438466	NA	NA	NA	2.88794771130666e-09	NA	NA	NA	0.22	NA	0.0250654
GRB10	1	0	1	0	0	NA	0.100206642459632	NA	NA	NA	1.44264004399115e-18	NA	NA	NA	0.309	NA	NA	0.0250517
TCERG1	1	0	1	0	0	NA	0.100206642459632	NA	NA	NA	1.21842041606191e-15	NA	NA	NA	0.296	NA	NA	0.0250517
MMUT	1	0	1	0	0	NA	0.100150898924474	NA	NA	NA	1.06175134812961e-16	NA	NA	NA	0.273	NA	NA	0.0250377
PHF20L1	1	0	1	0	0	NA	0.100150898924474	NA	NA	NA	6.96116456884489e-19	NA	NA	NA	0.278	NA	NA	0.0250377
LRRC28	1	0	1	0	0	NA	0.100145794852446	NA	NA	NA	1.59851848071387e-21	NA	NA	NA	0.184	NA	NA	0.0250364
SYT11	1	0	0	1	0	NA	NA	0.10011060879984	NA	NA	NA	0.000204402170167809	NA	NA	NA	0.951	NA	0.0250277
PSME3	1	0	1	0	0	NA	0.100089935918098	NA	NA	NA	2.34770227306501e-18	NA	NA	NA	0.34	NA	NA	0.0250225
DLGAP1-AS4	1	0	1	0	0	NA	0.100070984859207	NA	NA	NA	8.74047363632731e-27	NA	NA	NA	0.176	NA	NA	0.0250177

## Sheet: Layer 3_up_DEG
The following spreadsheets are derived from DEGs analysis for layer 1 to layer 6, and white matter. In those spreadsheets, column A indicates gene ID. Column B indicates the number of overlapping genes from four samples. Column G to column J indicates the log fold change of four samples in the same order. Column K to column N indicates the p-value. Column O to column R indicates the proportion of…
Gene	contribution summary					logFC (e as base, cutoff >= 0.1)				p-value (Wilcoxon test, cutoff <= 0.05)				proportion of spots express the gene in this layer				mean logFC (e as base) of four samples	GO enrichment analysis									KEGG pathway analysis									Reactome analysis
ID	overlap	CT2.contribute	CT1.contribute	AD1.contribute	AD2.contribute	CT2.Layer 1_up_logFC	CT1.Layer 1_up_logFC	AD1.Layer 1_up_logFC	AD2.Layer 1_up_logFC	CT2.Layer 1_up_pval	CT1.Layer 1_up_pval	AD1.Layer 1_up_pval	AD2.Layer 1_up_pval	CT2.Layer 1_pct.1	CT1.Layer 1_pct.1	AD1.Layer 1_pct.1	AD2.Layer 1_pct.1	mean_logfc	ID	Description	GeneRatio	BgRatio	pvalue	p.adjust	qvalue	geneID	Count	ID	Description	GeneRatio	BgRatio	pvalue	p.adjust	qvalue	geneID	Count	ID	Description	GeneRatio	BgRatio	pvalue	p.adjust	qvalue	geneID	Count
OLFM2	3	1	1	1	0	0.10231190276804	0.134638152364385	0.133796640295272	NA	6.40934422516819e-14	8.53919989151198e-17	1.95320376377984e-12	NA	0.427	0.369	0.599	NA	0.0926867	GO:0007409	axonogenesis	3/7	482/18866	0.000537267	0.0448369	0.0231654	ADCY1/TTL/KIF5A	3	hsa04913	Ovarian steroidogenesis	1/4	51/8108	0.0249285	0.104718	0.0622264	ADCY1	1	R-HSA-170660	Adenylate cyclase activating pathway	1/4	10/10704	0.00373221	0.0420379	0.0123901	ADCY1	1
MT-ATP6	2	1	0	1	0	0.143084114437576	NA	0.281390144855372	NA	2.95967506585685e-171	NA	6.40066128471341e-178	NA	1	NA	1	NA	0.106119	GO:0046928	regulation of neurotransmitter secretion	2/7	106/18866	0.000644746	0.0448369	0.0231654	BAIAP3/ADCY1	2	hsa04923	Regulation of lipolysis in adipocytes	1/4	57/8108	0.0278303	0.104718	0.0622264	ADCY1	1	R-HSA-5625970	RHO GTPases activate KTN1	1/4	11/10704	0.00410486	0.0420379	0.0123901	KIF5A	1
MT-CYB	2	1	0	1	0	0.122437848634566	NA	0.281262241531136	NA	1.24021751538575e-127	NA	2.97117712662916e-159	NA	1	NA	1	NA	0.100925	GO:0051588	regulation of neurotransmitter transport	2/7	120/18866	0.000825173	0.0448369	0.0231654	BAIAP3/ADCY1	2	hsa04213	Longevity regulating pathway - multiple species	1/4	62/8108	0.0302436	0.104718	0.0622264	ADCY1	1	R-HSA-1483213	Synthesis of PE	1/4	13/10704	0.00484983	0.0420379	0.0123901	ETNPPL	1
MT-ND1	2	1	0	1	0	0.128280266896763	NA	0.266170367513165	NA	3.77782407249391e-130	NA	7.16727110378778e-163	NA	1	NA	1	NA	0.0986127	GO:1903305	regulation of regulated secretory pathway	2/7	162/18866	0.00149598	0.0448369	0.0231654	BAIAP3/ADCY1	2	hsa04927	Cortisol synthesis and secretion	1/4	65/8108	0.0316893	0.104718	0.0622264	ADCY1	1	R-HSA-170670	Adenylate cyclase inhibitory pathway	1/4	14/10704	0.00522216	0.0420379	0.0123901	ADCY1	1
BAIAP3	2	0	1	0	1	NA	0.230588698002834	NA	0.117631782810207	NA	1.24526884583221e-28	NA	3.12719904933641e-14	NA	0.857	NA	0.903	0.0870551	GO:0016482	cytosolic transport	2/7	165/18866	0.00155125	0.0448369	0.0231654	BAIAP3/KIF5A	2	hsa04720	Long-term potentiation	1/4	67/8108	0.0326523	0.104718	0.0622264	ADCY1	1	R-HSA-442720	CREB1 phosphorylation through the activation of Adenylate Cyclase	1/4	14/10704	0.00522216	0.0420379	0.0123901	ADCY1	1
ADCY1	2	0	1	0	1	NA	0.190298405829393	NA	0.156098779206959	NA	1.77008986427387e-20	NA	7.81824482049943e-21	NA	0.803	NA	0.842	0.0865993	GO:0050806	positive regulation of synaptic transmission	2/7	172/18866	0.00168399	0.0448369	0.0231654	BAIAP3/ADCY1	2	hsa05223	Non-small cell lung cancer	1/4	72/8108	0.0350565	0.104718	0.0622264	KIF5A	1	R-HSA-164378	PKA activation in glucagon signalling	1/4	17/10704	0.00633853	0.0420379	0.0123901	ADCY1	1
TLCD4	2	0	1	0	1	NA	0.14560231205891	NA	0.145971001527794	NA	1.83990318556278e-21	NA	6.80387138263666e-29	NA	0.384	NA	0.497	0.0728933	GO:0007269	neurotransmitter secretion	2/7	175/18866	0.0017425	0.0448369	0.0231654	BAIAP3/ADCY1	2	hsa04918	Thyroid hormone synthesis	1/4	75/8108	0.0364969	0.104718	0.0622264	ADCY1	1	R-HSA-163615	PKA activation	1/4	20/10704	0.00745396	0.0420379	0.0123901	ADCY1	1
ETNPPL	2	1	0	1	0	0.123510063960387	NA	0.109246329905879	NA	1.08090453754846e-16	NA	1.08781053822485e-06	NA	0.914	NA	0.778	NA	0.0581891	GO:0099643	signal release from synapse	2/7	175/18866	0.0017425	0.0448369	0.0231654	BAIAP3/ADCY1	2	hsa04971	Gastric acid secretion	1/4	76/8108	0.0369767	0.104718	0.0622264	ADCY1	1	R-HSA-111931	PKA-mediated phosphorylation of CREB	1/4	22/10704	0.00819706	0.0420379	0.0123901	ADCY1	1
TTL	2	0	1	0	1	NA	0.103433179562245	NA	0.111965522531546	NA	3.70920985210974e-15	NA	7.39822457099665e-18	NA	0.336	NA	0.417	0.0538497	GO:0017157	regulation of exocytosis	2/7	222/18866	0.00278427	0.0448369	0.0231654	BAIAP3/ADCY1	2	hsa04911	Insulin secretion	1/4	86/8108	0.0417646	0.104718	0.0622264	ADCY1	1	R-HSA-264876	Insulin processing	1/4	27/10704	0.010053	0.0420379	0.0123901	KIF5A	1
KIF5A	2	0	1	1	0	NA	0.112535752388351	0.100794526761876	NA	NA	3.8828855048185e-17	1.8040081469422e-10	NA	NA	0.98	0.993	NA	0.0533326	GO:0006836	neurotransmitter transport	2/7	229/18866	0.00295935	0.0448369	0.0231654	BAIAP3/ADCY1	2	hsa04540	Gap junction	1/4	88/8108	0.04272	0.104718	0.0622264	ADCY1	1	R-HSA-163359	Glucagon signaling in metabolic regulation	1/4	33/10704	0.0122766	0.0420379	0.0123901	ADCY1	1
MT-CO3	1	0	0	1	0	NA	NA	0.264086093901362	NA	NA	NA	1.07291804160174e-178	NA	NA	NA	1	NA	0.0660215	GO:0001505	regulation of neurotransmitter levels	2/7	235/18866	0.00311349	0.0448369	0.0231654	BAIAP3/ADCY1	2	hsa04211	Longevity regulating pathway	1/4	89/8108	0.0431974	0.104718	0.0622264	ADCY1	1	R-HSA-111933	Calmodulin induced events	1/4	37/10704	0.013757	0.0420379	0.0123901	ADCY1	1
CBLN4	1	0	0	0	1	NA	NA	NA	0.246604926312853	NA	NA	NA	6.4616177109217e-64	NA	NA	NA	0.51	0.0616512	GO:0006171	cAMP biosynthetic process	1/7	10/18866	0.00370507	0.0448369	0.0231654	ADCY1	1	hsa04727	GABAergic synapse	1/4	89/8108	0.0431974	0.104718	0.0622264	ADCY1	1	R-HSA-111997	CaM pathway	1/4	37/10704	0.013757	0.0420379	0.0123901	ADCY1	1
NECAB2	1	0	0	0	1	NA	NA	NA	0.209447892568676	NA	NA	NA	8.15460060459272e-33	NA	NA	NA	0.81	0.052362	GO:0098935	dendritic transport	1/7	10/18866	0.00370507	0.0448369	0.0231654	KIF5A	1	hsa04976	Bile secretion	1/4	89/8108	0.0431974	0.104718	0.0622264	ADCY1	1	R-HSA-111996	Ca-dependent events	1/4	39/10704	0.0144966	0.0420379	0.0123901	ADCY1	1
TMEM59L	1	0	0	0	1	NA	NA	NA	0.190280296131229	NA	NA	NA	2.63282337346606e-47	NA	NA	NA	0.995	0.0475701	GO:0032253	dense core granule localization	1/7	11/18866	0.00407493	0.0448369	0.0231654	KIF5A	1	hsa05032	Morphine addiction	1/4	91/8108	0.0441518	0.104718	0.0622264	ADCY1	1	R-HSA-8955332	Carboxyterminal post-translational modifications of tubulin	1/4	39/10704	0.0144966	0.0420379	0.0123901	TTL	1
NAGPA	1	0	0	0	1	NA	NA	NA	0.185345338002184	NA	NA	NA	1.9698926629963e-35	NA	NA	NA	0.517	0.0463363	GO:0099519	dense core granule cytoskeletal transport	1/7	11/18866	0.00407493	0.0448369	0.0231654	KIF5A	1	hsa04912	GnRH signaling pathway	1/4	93/8108	0.0451054	0.104718	0.0622264	ADCY1	1	R-HSA-9664323	FCGR3A-mediated IL10 synthesis	1/4	40/10704	0.0148662	0.0420379	0.0123901	ADCY1	1
RCAN2	1	0	0	0	1	NA	NA	NA	0.18154376087599	NA	NA	NA	7.13523547817645e-27	NA	NA	NA	0.838	0.0453859	GO:1901950	dense core granule transport	1/7	11/18866	0.00407493	0.0448369	0.0231654	KIF5A	1	hsa04970	Salivary secretion	1/4	93/8108	0.0451054	0.104718	0.0622264	ADCY1	1	R-HSA-1489509	DAG and IP3 signaling	1/4	43/10704	0.0159744	0.0420379	0.0123901	ADCY1	1
NSG2	1	0	0	0	1	NA	NA	NA	0.17486464772084	NA	NA	NA	9.68886569151725e-30	NA	NA	NA	0.969	0.0437162	GO:1904321	response to forskolin	1/7	11/18866	0.00407493	0.0448369	0.0231654	ADCY1	1	hsa05414	Dilated cardiomyopathy	1/4	96/8108	0.0465346	0.104718	0.0622264	ADCY1	1	R-HSA-432040	Vasopressin regulates renal water homeostasis via Aquaporins	1/4	43/10704	0.0159744	0.0420379	0.0123901	ADCY1	1
SLC1A2	1	1	0	0	0	0.170614643221127	NA	NA	NA	1.09912013075433e-61	NA	NA	NA	1	NA	NA	NA	0.0426537	GO:1904322	cellular response to forskolin	1/7	11/18866	0.00407493	0.0448369	0.0231654	ADCY1	1	hsa04713	Circadian entrainment	1/4	97/8108	0.0470106	0.104718	0.0622264	ADCY1	1	R-HSA-977444	GABA B receptor activation	1/4	43/10704	0.0159744	0.0420379	0.0123901	ADCY1	1
CALM1	1	0	0	0	1	NA	NA	NA	0.168646686908714	NA	NA	NA	9.03721298066623e-81	NA	NA	NA	1	0.0421617	GO:1905383	protein localization to presynapse	1/7	11/18866	0.00407493	0.0448369	0.0231654	KIF5A	1	hsa00564	Glycerophospholipid metabolism	1/4	98/8108	0.0474864	0.104718	0.0622264	ETNPPL	1	R-HSA-991365	Activation of GABAB receptors	1/4	43/10704	0.0159744	0.0420379	0.0123901	ADCY1	1
TENM2	1	0	0	0	1	NA	NA	NA	0.166304635663124	NA	NA	NA	1.69577411086058e-37	NA	NA	NA	0.414	0.0415762	GO:0043696	dedifferentiation	1/7	12/18866	0.00444467	0.0448369	0.0231654	OLFM2	1	hsa01522	Endocrine resistance	1/4	98/8108	0.0474864	0.104718	0.0622264	ADCY1	1	R-HSA-418597	G alpha (z) signalling events	1/4	48/10704	0.0178194	0.0444736	0.013108	ADCY1	1
ADCY2	1	0	0	1	0	NA	NA	0.165082253598623	NA	NA	NA	4.56468366931279e-16	NA	NA	NA	0.682	NA	0.0412706	GO:0043697	cell dedifferentiation	1/7	12/18866	0.00444467	0.0448369	0.0231654	OLFM2	1	hsa04750	Inflammatory mediator regulation of TRP channels	1/4	98/8108	0.0474864	0.104718	0.0622264	ADCY1	1	R-HSA-445717	Aquaporin-mediated transport	1/4	52/10704	0.0192935	0.0444736	0.013108	ADCY1	1
CACNA2D1	1	0	0	0	1	NA	NA	NA	0.163969554792588	NA	NA	NA	6.50482500470278e-24	NA	NA	NA	0.637	0.0409924	GO:0090677	reversible differentiation	1/7	13/18866	0.0048143	0.0448369	0.0231654	OLFM2	1	hsa04925	Aldosterone synthesis and secretion	1/4	98/8108	0.0474864	0.104718	0.0622264	ADCY1	1	R-HSA-112043	PLC beta mediated events	1/4	55/10704	0.020398	0.0444736	0.013108	ADCY1	1
CRYM	1	0	0	0	1	NA	NA	NA	0.161759459542847	NA	NA	NA	6.02692260042434e-20	NA	NA	NA	0.794	0.0404399	GO:0099640	axo-dendritic protein transport	1/7	13/18866	0.0048143	0.0448369	0.0231654	KIF5A	1	hsa04914	Progesterone-mediated oocyte maturation	1/4	100/8108	0.0484376	0.104718	0.0622264	ADCY1	1	R-HSA-112040	G-protein mediated events	1/4	56/10704	0.020766	0.0444736	0.013108	ADCY1	1
SYNJ2	1	0	0	0	1	NA	NA	NA	0.159009332460646	NA	NA	NA	5.28566736450289e-35	NA	NA	NA	0.442	0.0397523	GO:0018410	C-terminal protein amino acid modification	1/7	14/18866	0.0051838	0.0448369	0.0231654	TTL	1	hsa04916	Melanogenesis	1/4	101/8108	0.0489129	0.104718	0.0622264	ADCY1	1	R-HSA-983189	Kinesins	1/4	59/10704	0.0218693	0.0444736	0.013108	KIF5A	1
IFRD1	1	0	0	0	1	NA	NA	NA	0.158802791619737	NA	NA	NA	1.22640101568007e-28	NA	NA	NA	0.475	0.0397007	GO:1900239	regulation of phenotypic switching	1/7	14/18866	0.0051838	0.0448369	0.0231654	OLFM2	1	hsa04972	Pancreatic secretion	1/4	102/8108	0.049388	0.104718	0.0622264	ADCY1	1	R-HSA-977443	GABA receptor activation	1/4	60/10704	0.0222368	0.0444736	0.013108	ADCY1	1
CAMKK2	1	0	0	0	1	NA	NA	NA	0.1538954412358	NA	NA	NA	4.06757717791244e-21	NA	NA	NA	0.759	0.0384739	GO:0006646	phosphatidylethanolamine biosynthetic process	1/7	15/18866	0.00555319	0.0448369	0.0231654	ETNPPL	1	hsa05142	Chagas disease	1/4	102/8108	0.049388	0.104718	0.0622264	ADCY1	1	R-HSA-438064	Post NMDA receptor activation events	1/4	80/10704	0.029566	0.0568577	0.016758	ADCY1	1
MT-CO1	1	1	0	0	0	0.153622953522653	NA	NA	NA	3.37583420587749e-171	NA	NA	NA	1	NA	NA	NA	0.0384057	GO:0032252	secretory granule localization	1/7	15/18866	0.00555319	0.0448369	0.0231654	KIF5A	1	hsa05146	Amoebiasis	1/4	102/8108	0.049388	0.104718	0.0622264	ADCY1	1	R-HSA-2980736	Peptide hormone metabolism	1/4	90/10704	0.0332151	0.0591514	0.0174341	KIF5A	1
PLCB1	1	0	1	0	0	NA	0.152395171108538	NA	NA	NA	2.37295766380105e-13	NA	NA	NA	0.683	NA	NA	0.0380988	GO:0036166	phenotypic switching	1/7	17/18866	0.00629162	0.0487865	0.025206	OLFM2	1										R-HSA-111885	Opioid Signalling	1/4	92/10704	0.0339437	0.0591514	0.0174341	ADCY1	1
DTNB	1	0	0	0	1	NA	NA	NA	0.149566244703738	NA	NA	NA	4.1422929753218e-25	NA	NA	NA	0.561	0.0373916	GO:0034199	activation of protein kinase A activity	1/7	18/18866	0.00666065	0.0487865	0.025206	ADCY1	1										R-HSA-442755	Activation of NMDA receptors and postsynaptic events	1/4	93/10704	0.0343078	0.0591514	0.0174341	ADCY1	1
PCSK1N	1	0	0	0	1	NA	NA	NA	0.148934394293572	NA	NA	NA	7.21919839741011e-35	NA	NA	NA	0.999	0.0372336	GO:0008090	retrograde axonal transport	1/7	20/18866	0.00739837	0.0487865	0.025206	KIF5A	1										R-HSA-6811434	COPI-dependent Golgi-to-ER retrograde traffic	1/4	99/10704	0.0364905	0.0608174	0.0179251	KIF5A	1
RTN4RL2	1	0	0	0	1	NA	NA	NA	0.148912447362751	NA	NA	NA	6.70583529681141e-27	NA	NA	NA	0.469	0.0372281	GO:0032793	positive regulation of CREB transcription factor activity	1/7	20/18866	0.00739837	0.0487865	0.025206	ADCY1	1										R-HSA-163685	Integration of energy metabolism	1/4	108/10704	0.0397575	0.064125	0.0189	ADCY1	1
CARTPT	1	1	0	0	0	0.148428615082585	NA	NA	NA	3.19681869597707e-19	NA	NA	NA	0.394	NA	NA	NA	0.0371072	GO:0009190	cyclic nucleotide biosynthetic process	1/7	22/18866	0.00813562	0.0487865	0.025206	ADCY1	1										R-HSA-5610787	Hedgehog 'off' state	1/4	113/10704	0.041569	0.0649515	0.0191436	ADCY1	1
GRIN2B	1	0	0	0	1	NA	NA	NA	0.145473207070431	NA	NA	NA	2.03500818178143e-22	NA	NA	NA	0.683	0.0363683	GO:0046058	cAMP metabolic process	1/7	22/18866	0.00813562	0.0487865	0.025206	ADCY1	1										R-HSA-2132295	MHC class II antigen presentation	1/4	123/10704	0.0451841	0.0682625	0.0201195	KIF5A	1
RASD1	1	0	0	0	1	NA	NA	NA	0.144833054941699	NA	NA	NA	5.31210147181015e-19	NA	NA	NA	0.934	0.0362083	GO:0051152	positive regulation of smooth muscle cell differentiation	1/7	22/18866	0.00813562	0.0487865	0.025206	OLFM2	1										R-HSA-1483206	Glycerophospholipid biosynthesis	1/4	129/10704	0.0473483	0.0682625	0.0201195	ETNPPL	1
KCNJ3	1	0	0	0	1	NA	NA	NA	0.142466942691544	NA	NA	NA	5.44052413689848e-26	NA	NA	NA	0.51	0.0356167	GO:0052652	cyclic purine nucleotide metabolic process	1/7	22/18866	0.00813562	0.0487865	0.025206	ADCY1	1										R-HSA-8856688	Golgi-to-ER retrograde transport	1/4	133/10704	0.0487891	0.0682625	0.0201195	KIF5A	1
PHYHIP	1	0	0	0	1	NA	NA	NA	0.140216208449283	NA	NA	NA	1.65440721913447e-27	NA	NA	NA	0.999	0.0350541	GO:0001956	positive regulation of neurotransmitter secretion	1/7	23/18866	0.00850407	0.0487865	0.025206	BAIAP3	1										R-HSA-9660821	ADORA2B mediated anti-inflammatory cytokines production	1/4	134/10704	0.049149	0.0682625	0.0201195	ADCY1	1
SPRED1	1	0	0	0	1	NA	NA	NA	0.135610026861207	NA	NA	NA	2.21099367281407e-20	NA	NA	NA	0.599	0.0339025	GO:0010226	response to lithium ion	1/7	23/18866	0.00850407	0.0487865	0.025206	ADCY1	1
SLC1A1	1	0	0	0	1	NA	NA	NA	0.135258627669554	NA	NA	NA	2.65781963697485e-25	NA	NA	NA	0.368	0.0338147	GO:1900273	positive regulation of long-term synaptic potentiation	1/7	23/18866	0.00850407	0.0487865	0.025206	ADCY1	1
ASS1	1	0	0	0	1	NA	NA	NA	0.134607885069425	NA	NA	NA	4.3025947562833e-28	NA	NA	NA	0.397	0.033652	GO:0071377	cellular response to glucagon stimulus	1/7	26/18866	0.00960871	0.0537102	0.0277499	ADCY1	1
COA1	1	0	1	0	0	NA	0.134593302517181	NA	NA	NA	1.47584339668215e-21	NA	NA	NA	0.334	NA	NA	0.0336483	GO:0051656	establishment of organelle localization	2/7	432/18866	0.0101793	0.0550028	0.0284176	TTL/KIF5A	2
KCNK12	1	0	0	0	1	NA	NA	NA	0.134503557719916	NA	NA	NA	2.28274020196524e-28	NA	NA	NA	0.402	0.0336259	GO:0051590	positive regulation of neurotransmitter transport	1/7	28/18866	0.0103446	0.0550028	0.0284176	BAIAP3	1
ITGAV	1	0	0	1	0	NA	NA	0.13418545743445	NA	NA	NA	1.3948575027851e-11	NA	NA	NA	0.589	NA	0.0335464	GO:0046337	phosphatidylethanolamine metabolic process	1/7	30/18866	0.0110799	0.0551165	0.0284764	ETNPPL	1
GLRA2	1	0	0	0	1	NA	NA	NA	0.133610385026213	NA	NA	NA	4.87389509911299e-28	NA	NA	NA	0.302	0.0334026	GO:0050804	modulation of chemical synaptic transmission	2/7	454/18866	0.0111998	0.0551165	0.0284764	BAIAP3/ADCY1	2
GAREM2	1	0	0	1	0	NA	NA	0.133403249302431	NA	NA	NA	5.51819756576464e-13	NA	NA	NA	0.397	NA	0.0333508	GO:0099177	regulation of trans-synaptic signaling	2/7	455/18866	0.0112472	0.0551165	0.0284764	BAIAP3/ADCY1	2
MRTFB	1	0	0	0	1	NA	NA	NA	0.133389344355306	NA	NA	NA	6.74058664092133e-15	NA	NA	NA	0.891	0.0333473	GO:0009306	protein secretion	2/7	462/18866	0.0115819	0.0551165	0.0284764	OLFM2/BAIAP3	2
NAT8L	1	0	1	0	0	NA	0.132256484928881	NA	NA	NA	2.07416037486532e-18	NA	NA	NA	0.918	NA	NA	0.0330641	GO:0035592	establishment of protein localization to extracellular region	2/7	463/18866	0.0116301	0.0551165	0.0284764	OLFM2/BAIAP3	2
GALNT9	1	0	0	0	1	NA	NA	NA	0.130248624700604	NA	NA	NA	6.16499227536395e-17	NA	NA	NA	0.621	0.0325622	GO:0071692	protein localization to extracellular region	2/7	470/18866	0.0119699	0.0555198	0.0286848	OLFM2/BAIAP3	2
NRP2	1	0	0	0	1	NA	NA	NA	0.129807527117974	NA	NA	NA	1.82218757987961e-25	NA	NA	NA	0.332	0.0324519	GO:0007616	long-term memory	1/7	34/18866	0.0125493	0.0558315	0.0288458	ADCY1	1
LRRC8B	1	0	0	0	1	NA	NA	NA	0.12903633039001	NA	NA	NA	6.52039650059917e-18	NA	NA	NA	0.611	0.0322591	GO:0035774	positive regulation of insulin secretion involved in cellular response to glucose stimulus	1/7	34/18866	0.0125493	0.0558315	0.0288458	BAIAP3	1
CKB	1	0	0	0	1	NA	NA	NA	0.128821754103751	NA	NA	NA	1.19876869930342e-40	NA	NA	NA	1	0.0322054	GO:0032228	regulation of synaptic transmission, GABAergic	1/7	35/18866	0.0129163	0.0561455	0.029008	BAIAP3	1
PACSIN2	1	0	0	0	1	NA	NA	NA	0.128169477120716	NA	NA	NA	4.4768469578259e-25	NA	NA	NA	0.511	0.0320424	GO:0033762	response to glucagon	1/7	36/18866	0.0132832	0.0561455	0.029008	ADCY1	1
PLD3	1	0	0	0	1	NA	NA	NA	0.126837490441734	NA	NA	NA	4.65657030512827e-23	NA	NA	NA	0.995	0.0317094	GO:0003091	renal water homeostasis	1/7	37/18866	0.01365	0.0561455	0.029008	ADCY1	1
SMIM10L2B	1	0	1	0	0	NA	0.126773055573797	NA	NA	NA	3.66113315400416e-18	NA	NA	NA	0.289	NA	NA	0.0316933	GO:0033363	secretory granule organization	1/7	37/18866	0.01365	0.0561455	0.029008	BAIAP3	1
SOD3	1	0	0	0	1	NA	NA	NA	0.12564261146068	NA	NA	NA	7.77262601969815e-26	NA	NA	NA	0.331	0.0314107	GO:0007190	activation of adenylate cyclase activity	1/7	39/18866	0.0143833	0.058066	0.0300003	ADCY1	1
MSRA	1	0	0	0	1	NA	NA	NA	0.12533809428849	NA	NA	NA	2.69894485092234e-20	NA	NA	NA	0.367	0.0313345	GO:0009187	cyclic nucleotide metabolic process	1/7	40/18866	0.0147498	0.0584627	0.0302053	ADCY1	1
SCN1B	1	0	0	0	1	NA	NA	NA	0.124576428117856	NA	NA	NA	5.43910778351692e-15	NA	NA	NA	0.599	0.0311441	GO:0017158	regulation of calcium ion-dependent exocytosis	1/7	43/18866	0.0158485	0.0611689	0.0316034	BAIAP3	1
MTOR	1	0	1	0	0	NA	0.124458599306819	NA	NA	NA	3.10613837004719e-17	NA	NA	NA	0.328	NA	NA	0.0311146	GO:0048489	synaptic vesicle transport	1/7	44/18866	0.0162144	0.0611689	0.0316034	KIF5A	1
AKAP12	1	0	1	0	0	NA	0.124395093218497	NA	NA	NA	6.94307366273788e-11	NA	NA	NA	0.601	NA	NA	0.0310988	GO:0051150	regulation of smooth muscle cell differentiation	1/7	47/18866	0.0173117	0.0611689	0.0316034	OLFM2	1
GABRB3	1	0	0	0	1	NA	NA	NA	0.123887391897566	NA	NA	NA	1.00671902952357e-13	NA	NA	NA	0.823	0.0309718	GO:0008089	anterograde axonal transport	1/7	48/18866	0.0176772	0.0611689	0.0316034	KIF5A	1
LANCL2	1	0	0	0	1	NA	NA	NA	0.123823523693392	NA	NA	NA	1.69396562182654e-18	NA	NA	NA	0.53	0.0309559	GO:0051932	synaptic transmission, GABAergic	1/7	48/18866	0.0176772	0.0611689	0.0316034	BAIAP3	1
CHRNB2	1	0	0	0	1	NA	NA	NA	0.123751277052271	NA	NA	NA	4.27852742398882e-21	NA	NA	NA	0.376	0.0309378	GO:0062237	protein localization to postsynapse	1/7	48/18866	0.0176772	0.0611689	0.0316034	KIF5A	1
UNC13A	1	0	0	0	1	NA	NA	NA	0.123119406586899	NA	NA	NA	3.38875032343298e-14	NA	NA	NA	0.793	0.0307799	GO:0099637	neurotransmitter receptor transport	1/7	48/18866	0.0176772	0.0611689	0.0316034	KIF5A	1
CACNA1E	1	0	0	0	1	NA	NA	NA	0.122207601891534	NA	NA	NA	2.27993556464785e-16	NA	NA	NA	0.665	0.0305519	GO:1900271	regulation of long-term synaptic potentiation	1/7	48/18866	0.0176772	0.0611689	0.0316034	ADCY1	1
MFSD10	1	0	0	0	1	NA	NA	NA	0.121680905498418	NA	NA	NA	3.05182629385688e-21	NA	NA	NA	0.48	0.0304202	GO:0047496	vesicle transport along microtubule	1/7	49/18866	0.0180427	0.0614578	0.0317527	KIF5A	1
SCARB1	1	0	0	0	1	NA	NA	NA	0.121538379059262	NA	NA	NA	3.26410733343837e-22	NA	NA	NA	0.453	0.0303846	GO:0061178	regulation of insulin secretion involved in cellular response to glucose stimulus	1/7	57/18866	0.0209617	0.0682038	0.0352381	BAIAP3	1
RAPGEFL1	1	0	0	0	1	NA	NA	NA	0.12078978626346	NA	NA	NA	5.95488459945326e-19	NA	NA	NA	0.557	0.0301974	GO:0097120	receptor localization to synapse	1/7	57/18866	0.0209617	0.0682038	0.0352381	KIF5A	1
GRM1	1	0	0	0	1	NA	NA	NA	0.120229626932327	NA	NA	NA	1.03049500161035e-23	NA	NA	NA	0.31	0.0300574	GO:0097479	synaptic vesicle localization	1/7	57/18866	0.0209617	0.0682038	0.0352381	KIF5A	1
EPRS	1	0	0	0	1	NA	NA	NA	0.120090801713606	NA	NA	NA	1.72503595630199e-22	NA	NA	NA	0.472	0.0300227	GO:0098930	axonal transport	1/7	59/18866	0.0216903	0.0695367	0.0359267	KIF5A	1
FAM155A	1	0	0	0	1	NA	NA	NA	0.119708418739758	NA	NA	NA	1.40928785999626e-23	NA	NA	NA	0.396	0.0299271	GO:0051310	metaphase plate congression	1/7	61/18866	0.0224185	0.0708294	0.0365946	TTL	1
MYO9A	1	0	0	0	1	NA	NA	NA	0.119472846853431	NA	NA	NA	7.34905520609714e-23	NA	NA	NA	0.421	0.0298682	GO:0017156	calcium-ion regulated exocytosis	1/7	65/18866	0.0238734	0.0733013	0.0378718	BAIAP3	1
ARHGAP32	1	0	0	0	1	NA	NA	NA	0.119054524832839	NA	NA	NA	2.90520184344024e-16	NA	NA	NA	0.628	0.0297636	GO:0035773	insulin secretion involved in cellular response to glucose stimulus	1/7	65/18866	0.0238734	0.0733013	0.0378718	BAIAP3	1
DHRS7	1	0	1	0	0	NA	0.118662213027361	NA	NA	NA	5.24519204771014e-17	NA	NA	NA	0.471	NA	NA	0.0296656	GO:0098840	protein transport along microtubule	1/7	68/18866	0.0249633	0.074548	0.0385159	KIF5A	1
USP2	1	0	0	0	1	NA	NA	NA	0.118303600101179	NA	NA	NA	2.87675352956776e-20	NA	NA	NA	0.367	0.0295759	GO:0099118	microtubule-based protein transport	1/7	68/18866	0.0249633	0.074548	0.0385159	KIF5A	1
ARPP19	1	0	0	0	1	NA	NA	NA	0.118103810742685	NA	NA	NA	5.79650284087029e-22	NA	NA	NA	0.997	0.029526	GO:0008088	axo-dendritic transport	1/7	70/18866	0.0256894	0.0756795	0.0391005	KIF5A	1
DLGAP2	1	0	0	0	1	NA	NA	NA	0.117572147811461	NA	NA	NA	3.5847200168656e-22	NA	NA	NA	0.344	0.029393	GO:0050891	multicellular organismal water homeostasis	1/7	71/18866	0.0260522	0.0757251	0.039124	ADCY1	1
TOR1AIP2	1	0	0	0	1	NA	NA	NA	0.116353449756378	NA	NA	NA	4.16779804692776e-19	NA	NA	NA	0.452	0.0290884	GO:0051145	smooth muscle cell differentiation	1/7	73/18866	0.0267776	0.0768094	0.0396842	OLFM2	1
CEBPZOS	1	0	0	0	1	NA	NA	NA	0.116340627046587	NA	NA	NA	3.90420628639945e-23	NA	NA	NA	0.416	0.0290852	GO:0032024	positive regulation of insulin secretion	1/7	74/18866	0.0271401	0.0768381	0.0396991	BAIAP3	1
LGMN	1	0	0	0	1	NA	NA	NA	0.115612875659203	NA	NA	NA	4.62191627779268e-22	NA	NA	NA	0.504	0.0289032	GO:0099518	vesicle cytoskeletal trafficking	1/7	75/18866	0.0275025	0.0768659	0.0397134	KIF5A	1
TMEM38A	1	0	0	0	1	NA	NA	NA	0.115137006831879	NA	NA	NA	3.23904638043559e-23	NA	NA	NA	0.393	0.0287843	GO:0150076	neuroinflammatory response	1/7	77/18866	0.0282269	0.0769669	0.0397656	ADCY1	1
KIAA1549L	1	0	0	0	1	NA	NA	NA	0.115083906337355	NA	NA	NA	1.43442596704516e-12	NA	NA	NA	0.816	0.028771	GO:0030104	water homeostasis	1/7	79/18866	0.0289509	0.0769669	0.0397656	ADCY1	1
APOO	1	0	0	0	1	NA	NA	NA	0.114852565538003	NA	NA	NA	1.54596555280426e-19	NA	NA	NA	0.441	0.0287131	GO:0050000	chromosome localization	1/7	79/18866	0.0289509	0.0769669	0.0397656	TTL	1
TMEM14B	1	0	0	0	1	NA	NA	NA	0.113264455826656	NA	NA	NA	1.01779827076385e-19	NA	NA	NA	0.42	0.0283161	GO:0051303	establishment of chromosome localization	1/7	79/18866	0.0289509	0.0769669	0.0397656	TTL	1
FAM120A	1	0	0	0	1	NA	NA	NA	0.113240917808283	NA	NA	NA	2.46179295023178e-20	NA	NA	NA	0.499	0.0283102	GO:2000300	regulation of synaptic vesicle exocytosis	1/7	80/18866	0.0293127	0.0769899	0.0397775	ADCY1	1
RAB4B	1	0	0	0	1	NA	NA	NA	0.113029377426927	NA	NA	NA	5.42183815892767e-22	NA	NA	NA	0.489	0.0282573	GO:0071277	cellular response to calcium ion	1/7	83/18866	0.0303974	0.0779953	0.040297	ADCY1	1
TCERG1L	1	0	0	0	1	NA	NA	NA	0.112928439102391	NA	NA	NA	1.81815137109945e-28	NA	NA	NA	0.204	0.0282321	GO:0035418	protein localization to synapse	1/7	85/18866	0.03112	0.0779953	0.040297	KIF5A	1
SLC25A39	1	0	0	0	1	NA	NA	NA	0.112521336060205	NA	NA	NA	5.48874697663104e-20	NA	NA	NA	0.505	0.0281303	GO:0072384	organelle transport along microtubule	1/7	85/18866	0.03112	0.0779953	0.040297	KIF5A	1
UNC50	1	0	0	0	1	NA	NA	NA	0.112493459284924	NA	NA	NA	1.9160657693101e-21	NA	NA	NA	0.371	0.0281234	GO:0007193	adenylate cyclase-inhibiting G protein-coupled receptor signaling pathway	1/7	86/18866	0.0314811	0.0779953	0.040297	ADCY1	1
TSPOAP1	1	0	0	0	1	NA	NA	NA	0.11240014485461	NA	NA	NA	8.71202538354111e-17	NA	NA	NA	0.578	0.0281	GO:0006890	retrograde vesicle-mediated transport, Golgi to endoplasmic reticulum	1/7	87/18866	0.0318421	0.0779953	0.040297	KIF5A	1
EBNA1BP2	1	0	0	0	1	NA	NA	NA	0.111631246402126	NA	NA	NA	5.08387504222653e-19	NA	NA	NA	0.415	0.0279078	GO:0060291	long-term synaptic potentiation	1/7	87/18866	0.0318421	0.0779953	0.040297	ADCY1	1
FAM117B	1	0	0	0	1	NA	NA	NA	0.111396472306929	NA	NA	NA	5.55862959406546e-24	NA	NA	NA	0.318	0.0278491	GO:0097306	cellular response to alcohol	1/7	91/18866	0.033285	0.0806011	0.0416432	ADCY1	1
TMEM108-AS1	1	0	0	0	1	NA	NA	NA	0.111392588900214	NA	NA	NA	2.44462091605005e-22	NA	NA	NA	0.191	0.0278481	GO:0042147	retrograde transport, endosome to Golgi	1/7	92/18866	0.0336454	0.0806011	0.0416432	BAIAP3	1
TNKS	1	0	0	0	1	NA	NA	NA	0.111281803380409	NA	NA	NA	4.49314149031703e-19	NA	NA	NA	0.458	0.0278205	GO:0030516	regulation of axon extension	1/7	97/18866	0.0354458	0.0829895	0.0428773	TTL	1
INSR	1	0	0	0	1	NA	NA	NA	0.110877595378139	NA	NA	NA	3.05784381709015e-16	NA	NA	NA	0.376	0.0277194	GO:1901655	cellular response to ketone	1/7	97/18866	0.0354458	0.0829895	0.0428773	ADCY1	1
MYL9	1	0	0	1	0	NA	NA	0.110646224757623	NA	NA	NA	9.12387460752816e-09	NA	NA	NA	0.276	NA	0.0276616	GO:0019886	antigen processing and presentation of exogenous peptide antigen via MHC class II	1/7	99/18866	0.0361652	0.0829895	0.0428773	KIF5A	1
GTF2H5	1	0	0	0	1	NA	NA	NA	0.110624196495026	NA	NA	NA	1.9317661299965e-18	NA	NA	NA	0.489	0.027656	GO:0090277	positive regulation of peptide hormone secretion	1/7	99/18866	0.0361652	0.0829895	0.0428773	BAIAP3	1
ZNF721	1	0	1	0	0	NA	0.110588438465807	NA	NA	NA	2.28620529129805e-16	NA	NA	NA	0.254	NA	NA	0.0276471	GO:0002495	antigen processing and presentation of peptide antigen via MHC class II	1/7	103/18866	0.0376025	0.0852435	0.0440418	KIF5A	1
TNRC6C	1	0	0	0	1	NA	NA	NA	0.110511473449346	NA	NA	NA	2.74523490149263e-22	NA	NA	NA	0.455	0.0276279	GO:0002504	antigen processing and presentation of peptide or polysaccharide antigen via MHC class II	1/7	104/18866	0.0379615	0.0852435	0.0440418	KIF5A	1
SSR2	1	0	1	0	0	NA	0.109733819598068	NA	NA	NA	3.58537372666149e-13	NA	NA	NA	0.445	NA	NA	0.0274335	GO:1902414	protein localization to cell junction	1/7	105/18866	0.0383205	0.0852435	0.0440418	KIF5A	1
TTYH3	1	0	0	0	1	NA	NA	NA	0.109426270011429	NA	NA	NA	2.96621625995423e-13	NA	NA	NA	0.61	0.0273566	GO:0051983	regulation of chromosome segregation	1/7	107/18866	0.039038	0.0859625	0.0444132	TTL	1
GRK3	1	0	0	0	1	NA	NA	NA	0.109211130424815	NA	NA	NA	4.60355146275828e-17	NA	NA	NA	0.476	0.0273028	GO:0051149	positive regulation of muscle cell differentiation	1/7	111/18866	0.0404717	0.0873547	0.0451325	OLFM2	1
NEU1	1	0	0	0	1	NA	NA	NA	0.109191648806181	NA	NA	NA	1.75218405558531e-18	NA	NA	NA	0.382	0.0272979	GO:0061387	regulation of extent of cell growth	1/7	111/18866	0.0404717	0.0873547	0.0451325	TTL	1
KLF9	1	0	0	0	1	NA	NA	NA	0.108931756862013	NA	NA	NA	1.4710678892557e-15	NA	NA	NA	0.576	0.0272329	GO:0098693	regulation of synaptic vesicle cycle	1/7	114/18866	0.0415457	0.0887938	0.0458761	ADCY1	1
AJ009632.2	1	0	0	0	1	NA	NA	NA	0.108584561576808	NA	NA	NA	2.29939185293136e-39	NA	NA	NA	0.159	0.0271461	GO:0007613	memory	1/7	121/18866	0.0440478	0.092057	0.047562	ADCY1	1
SYT16	1	0	0	0	1	NA	NA	NA	0.108512533500482	NA	NA	NA	7.1836698971726e-14	NA	NA	NA	0.574	0.0271281	GO:0016079	synaptic vesicle exocytosis	1/7	121/18866	0.0440478	0.092057	0.047562	ADCY1	1
GPR153	1	0	0	0	1	NA	NA	NA	0.108239957564239	NA	NA	NA	2.44776054451084e-26	NA	NA	NA	0.24	0.02706	GO:0042752	regulation of circadian rhythm	1/7	122/18866	0.0444048	0.092057	0.047562	ADCY1	1
ZFAND6	1	0	0	0	1	NA	NA	NA	0.107882247038521	NA	NA	NA	6.62702998040956e-18	NA	NA	NA	0.397	0.0269706	GO:0048675	axon extension	1/7	123/18866	0.0447616	0.092057	0.047562	TTL	1
PDGFRB	1	0	0	1	0	NA	NA	0.107858208565398	NA	NA	NA	1.11240826299562e-10	NA	NA	NA	0.313	NA	0.0269646	GO:0003014	renal system process	1/7	125/18866	0.045475	0.0926501	0.0478685	ADCY1	1
ATP2B1	1	0	0	0	1	NA	NA	NA	0.107847280280778	NA	NA	NA	1.00311458900058e-12	NA	NA	NA	0.926	0.0269618	GO:0046887	positive regulation of hormone secretion	1/7	131/18866	0.0476125	0.0961067	0.0496544	BAIAP3	1
PLEKHG5	1	0	0	0	1	NA	NA	NA	0.107779413927461	NA	NA	NA	1.94405879939207e-20	NA	NA	NA	0.286	0.0269449	GO:0071333	cellular response to glucose stimulus	1/7	134/18866	0.0486797	0.0973594	0.0503016	BAIAP3	1
EFNA3	1	0	0	0	1	NA	NA	NA	0.10763761010635	NA	NA	NA	1.02514685671983e-19	NA	NA	NA	0.355	0.0269094	GO:0071331	cellular response to hexose stimulus	1/7	136/18866	0.0493906	0.097699	0.050477	BAIAP3	1
C2orf72	1	0	0	0	1	NA	NA	NA	0.107530686823703	NA	NA	NA	1.20799722743371e-16	NA	NA	NA	0.439	0.0268827	GO:0071326	cellular response to monosaccharide stimulus	1/7	137/18866	0.0497458	0.097699	0.050477	BAIAP3	1
ANKRD17	1	0	0	0	1	NA	NA	NA	0.107493035294395	NA	NA	NA	1.00601708039505e-18	NA	NA	NA	0.514	0.0268733
CALY	1	0	0	0	1	NA	NA	NA	0.107462086779087	NA	NA	NA	2.29102067802156e-14	NA	NA	NA	0.981	0.0268655
PKN1	1	0	0	0	1	NA	NA	NA	0.107255554824116	NA	NA	NA	1.70119233916113e-19	NA	NA	NA	0.403	0.0268139
SNAPC5	1	0	0	0	1	NA	NA	NA	0.107245318367806	NA	NA	NA	1.08657720527163e-17	NA	NA	NA	0.418	0.0268113
NAXD	1	0	0	0	1	NA	NA	NA	0.107061344456279	NA	NA	NA	1.15672452408519e-18	NA	NA	NA	0.392	0.0267653
SPIRE1	1	0	0	0	1	NA	NA	NA	0.106499142339823	NA	NA	NA	1.01442791705384e-15	NA	NA	NA	0.489	0.0266248
MAP2	1	0	0	0	1	NA	NA	NA	0.106460975968695	NA	NA	NA	6.04424536880484e-20	NA	NA	NA	1	0.0266152
ANTKMT	1	0	0	0	1	NA	NA	NA	0.10644876225927	NA	NA	NA	4.68793692784808e-16	NA	NA	NA	0.53	0.0266122
INTS10	1	0	0	0	1	NA	NA	NA	0.106374130466665	NA	NA	NA	5.35902433082286e-18	NA	NA	NA	0.441	0.0265935
CBL	1	0	0	0	1	NA	NA	NA	0.106190132740127	NA	NA	NA	3.48426364769827e-19	NA	NA	NA	0.318	0.0265475
TRA2A	1	0	0	0	1	NA	NA	NA	0.105958570253623	NA	NA	NA	3.02946820365918e-15	NA	NA	NA	0.526	0.0264896
ATP9B	1	0	0	0	1	NA	NA	NA	0.105588439385012	NA	NA	NA	8.15747277582215e-20	NA	NA	NA	0.277	0.0263971
RBM14	1	0	0	0	1	NA	NA	NA	0.105551694792587	NA	NA	NA	5.04950057608178e-17	NA	NA	NA	0.547	0.0263879
C14orf132	1	0	1	0	0	NA	0.105248473911431	NA	NA	NA	1.38409583322341e-07	NA	NA	NA	0.742	NA	NA	0.0263121
SETD3	1	0	0	0	1	NA	NA	NA	0.105173424324695	NA	NA	NA	2.94087235287078e-18	NA	NA	NA	0.414	0.0262934
CCDC127	1	0	0	0	1	NA	NA	NA	0.104660814137641	NA	NA	NA	1.14289866503963e-21	NA	NA	NA	0.347	0.0261652
PPP4C	1	0	0	0	1	NA	NA	NA	0.104456550993153	NA	NA	NA	1.01852272837351e-15	NA	NA	NA	0.392	0.0261141
FAM110B	1	0	0	0	1	NA	NA	NA	0.104161585862418	NA	NA	NA	2.1447741104702e-16	NA	NA	NA	0.356	0.0260404
RBFOX3	1	0	0	0	1	NA	NA	NA	0.10412909099998	NA	NA	NA	1.61462633392129e-11	NA	NA	NA	0.71	0.0260323
ASB6	1	0	1	0	0	NA	0.104090439451902	NA	NA	NA	2.65254762876637e-14	NA	NA	NA	0.258	NA	NA	0.0260226
ZNF189	1	0	0	0	1	NA	NA	NA	0.103846770068861	NA	NA	NA	2.10226932874786e-17	NA	NA	NA	0.323	0.0259617
FRMD4A	1	0	1	0	0	NA	0.103796743678245	NA	NA	NA	1.251310471918e-16	NA	NA	NA	0.267	NA	NA	0.0259492
SRP54	1	0	1	0	0	NA	0.103394433573006	NA	NA	NA	3.31250988022282e-14	NA	NA	NA	0.291	NA	NA	0.0258486
GSR	1	0	0	0	1	NA	NA	NA	0.10338327854812	NA	NA	NA	4.66580977736445e-18	NA	NA	NA	0.404	0.0258458
ABCF2	1	0	0	0	1	NA	NA	NA	0.103376356295401	NA	NA	NA	6.1672476084214e-18	NA	NA	NA	0.455	0.0258441
PAM16	1	0	0	0	1	NA	NA	NA	0.103311817808694	NA	NA	NA	3.02992823374302e-15	NA	NA	NA	0.442	0.025828
ZNRF1	1	0	0	0	1	NA	NA	NA	0.103307226296411	NA	NA	NA	2.34179319391771e-17	NA	NA	NA	0.371	0.0258268
ARFGEF3	1	0	0	0	1	NA	NA	NA	0.103304617710772	NA	NA	NA	8.40655151314457e-14	NA	NA	NA	0.605	0.0258262
AAMP	1	0	0	0	1	NA	NA	NA	0.103205000549745	NA	NA	NA	7.56836779317966e-17	NA	NA	NA	0.497	0.0258013
EMC6	1	0	0	0	1	NA	NA	NA	0.102938673254533	NA	NA	NA	1.4218460982236e-15	NA	NA	NA	0.392	0.0257347
FAM160B2	1	0	0	0	1	NA	NA	NA	0.102662143848417	NA	NA	NA	4.00207402488992e-21	NA	NA	NA	0.307	0.0256655
ELP1	1	0	0	0	1	NA	NA	NA	0.102373592280588	NA	NA	NA	4.30751908393957e-16	NA	NA	NA	0.424	0.0255934
PCDH17	1	0	0	0	1	NA	NA	NA	0.102360262727379	NA	NA	NA	2.05715473581229e-16	NA	NA	NA	0.379	0.0255901
CZIB	1	0	0	0	1	NA	NA	NA	0.102333091179812	NA	NA	NA	1.98668675288642e-19	NA	NA	NA	0.467	0.0255833
BTBD6	1	0	0	0	1	NA	NA	NA	0.10230601153875	NA	NA	NA	8.06261337567304e-15	NA	NA	NA	0.507	0.0255765
BTBD9	1	0	0	0	1	NA	NA	NA	0.102063702820105	NA	NA	NA	3.87274817049633e-16	NA	NA	NA	0.556	0.0255159
DECR1	1	0	0	1	0	NA	NA	0.102059344554253	NA	NA	NA	1.75152765600168e-09	NA	NA	NA	0.357	NA	0.0255148
CD2BP2	1	0	0	0	1	NA	NA	NA	0.101927745782319	NA	NA	NA	6.57869186185708e-16	NA	NA	NA	0.524	0.0254819
ACIN1	1	0	0	0	1	NA	NA	NA	0.101723295582268	NA	NA	NA	1.43473959887979e-17	NA	NA	NA	0.427	0.0254308
SPRED2	1	0	0	0	1	NA	NA	NA	0.101630427250068	NA	NA	NA	1.22748540318811e-16	NA	NA	NA	0.325	0.0254076
AC122707.1	1	0	0	0	1	NA	NA	NA	0.101586375842068	NA	NA	NA	8.25057540420762e-21	NA	NA	NA	0.228	0.0253966
IVD	1	0	0	0	1	NA	NA	NA	0.101533123047235	NA	NA	NA	2.39397576127576e-17	NA	NA	NA	0.508	0.0253833
CNNM2	1	0	1	0	0	NA	0.101523304040709	NA	NA	NA	1.89032592162669e-14	NA	NA	NA	0.243	NA	NA	0.0253808
TOX3	1	0	0	0	1	NA	NA	NA	0.101268925599727	NA	NA	NA	2.01553793225778e-28	NA	NA	NA	0.186	0.0253172
KCNK3	1	0	0	0	1	NA	NA	NA	0.101181118728974	NA	NA	NA	4.61897396615033e-21	NA	NA	NA	0.239	0.0252953
NPM2	1	0	0	0	1	NA	NA	NA	0.10106770214222	NA	NA	NA	3.75319873772535e-18	NA	NA	NA	0.288	0.0252669
AC006058.1	1	0	0	0	1	NA	NA	NA	0.101036324184462	NA	NA	NA	2.1178894849509e-21	NA	NA	NA	0.222	0.0252591
PPP1R13B	1	0	0	0	1	NA	NA	NA	0.101012071310771	NA	NA	NA	1.86094873333424e-15	NA	NA	NA	0.39	0.025253
FAM174A	1	0	0	0	1	NA	NA	NA	0.100980865681273	NA	NA	NA	1.11810425893433e-18	NA	NA	NA	0.296	0.0252452
FBXO33	1	0	0	0	1	NA	NA	NA	0.10087897562056	NA	NA	NA	3.07646122369004e-16	NA	NA	NA	0.308	0.0252197
NEK6	1	0	0	0	1	NA	NA	NA	0.100834706025949	NA	NA	NA	2.48570773105715e-20	NA	NA	NA	0.357	0.0252087
RPA2	1	0	0	0	1	NA	NA	NA	0.100624676897453	NA	NA	NA	1.61769972074274e-17	NA	NA	NA	0.443	0.0251562
NOL7	1	0	0	0	1	NA	NA	NA	0.100362067138009	NA	NA	NA	1.36568680847617e-17	NA	NA	NA	0.467	0.0250905
BCL2	1	0	0	0	1	NA	NA	NA	0.100353578676908	NA	NA	NA	1.02562526653819e-18	NA	NA	NA	0.28	0.0250884
SPNS2	1	0	0	0	1	NA	NA	NA	0.100337147795874	NA	NA	NA	1.47640922951128e-15	NA	NA	NA	0.379	0.0250843
LY86-AS1	1	0	0	0	1	NA	NA	NA	0.100322248752964	NA	NA	NA	8.01666457737994e-17	NA	NA	NA	0.223	0.0250806
LSM1	1	0	0	0	1	NA	NA	NA	0.100279391741628	NA	NA	NA	1.22280251432914e-16	NA	NA	NA	0.346	0.0250698
RBM15B	1	0	1	0	0	NA	0.100045962755716	NA	NA	NA	4.74003333652301e-12	NA	NA	NA	0.249	NA	NA	0.0250115

## Sheet: Layer 4_up_DEG
The following spreadsheets are derived from DEGs analysis for layer 1 to layer 6, and white matter. In those spreadsheets, column A indicates gene ID. Column B indicates the number of overlapping genes from four samples. Column G to column J indicates the log fold change of four samples in the same order. Column K to column N indicates the p-value. Column O to column R indicates the proportion of…
Gene	contribution summary					logFC (e as base, cutoff >= 0.1)				p-value (Wilcoxon test, cutoff <= 0.05)				proportion of spots express the gene in this layer				mean logFC (e as base) of four samples	GO enrichment analysis									KEGG pathway analysis									Reactome analysis
ID	overlap	CT2.contribute	CT1.contribute	AD1.contribute	AD2.contribute	CT2.Layer 1_up_logFC	CT1.Layer 1_up_logFC	AD1.Layer 1_up_logFC	AD2.Layer 1_up_logFC	CT2.Layer 1_up_pval	CT1.Layer 1_up_pval	AD1.Layer 1_up_pval	AD2.Layer 1_up_pval	CT2.Layer 1_pct.1	CT1.Layer 1_pct.1	AD1.Layer 1_pct.1	AD2.Layer 1_pct.1	mean_logfc	ID	Description	GeneRatio	BgRatio	pvalue	p.adjust	qvalue	geneID	Count	ID	Description	GeneRatio	BgRatio	pvalue	p.adjust	qvalue	geneID	Count	ID	Description	GeneRatio	BgRatio	pvalue	p.adjust	qvalue	geneID	Count
ESRRA	3	0	1	1	1	NA	0.145563917404976	0.105972731439003	0.111502821485643	NA	2.1787340117546e-12	3.95238425782023e-06	5.37705420789486e-09	NA	0.343	0.339	0.31	0.0907599	GO:0006368	transcription elongation from RNA polymerase II promoter	4/74	87/18866	0.000379537	0.405346	0.397515	MLLT3/ELOF1/RNF8/CCNT2	4	hsa00030	Pentose phosphate pathway	2/28	30/8108	0.00471269	0.311038	0.311038	PRPS2/PGD	2	R-HSA-1989781	PPARA activates gene expression	5/43	117/10704	9.89294e-05	0.0109345	0.0099302	ESRRA/CREBBP/CCNC/ARNTL/MED24	5
TMUB2	3	0	1	1	1	NA	0.13337654787887	0.117143679887544	0.103797331716734	NA	1.26598115464912e-12	1.87759085231103e-05	6.0056682825811e-10	NA	0.394	0.416	0.457	0.0885794	GO:0006354	DNA-templated transcription, elongation	4/74	116/18866	0.00112083	0.409834	0.401917	MLLT3/ELOF1/RNF8/CCNT2	4	hsa04120	Ubiquitin mediated proteolysis	3/28	140/8108	0.0120383	0.397265	0.397265	CUL3/UBE2D4/UBE3C	3	R-HSA-400206	Regulation of lipid metabolism by PPARalpha	5/43	119/10704	0.000107201	0.0109345	0.0099302	ESRRA/CREBBP/CCNC/ARNTL/MED24	5
LHFPL6	2	0	1	1	0	NA	0.17226127318698	0.148962264989232	NA	NA	8.62336310779925e-18	1.71789708612003e-10	NA	NA	0.394	0.51	NA	0.0803059	GO:0048096	chromatin-mediated maintenance of transcription	2/74	13/18866	0.00115122	0.409834	0.401917	ELOF1/SMARCD1	2										R-HSA-71336	Pentose phosphate pathway	2/43	15/10704	0.00160118	0.10888	0.0988796	PRPS2/PGD	2
PDZRN3	2	0	0	1	1	NA	NA	0.137271044418319	0.170907762498949	NA	NA	2.83452539130736e-09	2.86490102403818e-20	NA	NA	0.302	0.37	0.0770447	GO:0007216	G protein-coupled glutamate receptor signaling pathway	2/74	15/18866	0.00154187	0.411679	0.403726	DAGLA/GRM2	2										R-HSA-381340	Transcriptional regulation of white adipocyte differentiation	3/43	84/10704	0.00458892	0.211813	0.192358	CREBBP/CCNC/MED24	3
NGB	2	0	0	1	1	NA	NA	0.103809311747625	0.191125585981289	NA	NA	2.49273066051818e-05	6.33635241568281e-31	NA	NA	0.253	0.286	0.0737337	GO:0051865	protein autoubiquitination	3/74	74/18866	0.00307568	0.545654	0.535113	CUL3/RNF8/NFX1	3										R-HSA-1368108	BMAL1:CLOCK,NPAS2 activates circadian gene expression	2/43	27/10704	0.00519149	0.211813	0.192358	CREBBP/ARNTL	2
STRN4	2	0	0	1	1	NA	NA	0.134154792933634	0.153590602116142	NA	NA	6.52473156617265e-08	1.17857070883174e-18	NA	NA	0.592	0.507	0.0719363	GO:0007289	spermatid nucleus differentiation	2/74	23/18866	0.00364055	0.545654	0.535113	RNF8/KDM3A	2										R-HSA-2173796	SMAD2/SMAD3:SMAD4 heterotrimer regulates transcription	2/43	32/10704	0.00724355	0.221681	0.20132	CCNC/CCNT2	2
APBB3	2	0	1	1	0	NA	0.128988993957675	0.15468170609272	NA	NA	1.99063561220883e-11	1.38469204091876e-12	NA	NA	0.322	0.433	NA	0.0709177	GO:0006367	transcription initiation from RNA polymerase II promoter	4/74	189/18866	0.00650634	0.545654	0.535113	ESRRA/CREBBP/CCNC/MED24	4										R-HSA-983168	Antigen processing: Ubiquitination & Proteasome degradation	5/43	309/10704	0.00760669	0.221681	0.20132	CUL3/UBE2D4/UBE3C/TRIM69/ASB13	5
MACROD2	2	0	1	0	1	NA	0.131224953873602	NA	0.149988173584583	NA	6.90236321267689e-17	NA	1.39003181839837e-21	NA	0.242	NA	0.3	0.0703033	GO:0007215	glutamate receptor signaling pathway	3/74	101/18866	0.0073331	0.545654	0.535113	DAGLA/CAPN1/GRM2	3										R-HSA-9007101	Rab regulation of trafficking	3/43	124/10704	0.0133676	0.253324	0.230057	RAB3GAP2/TBC1D13/ANKRD27	3
PTGFRN	2	0	1	1	0	NA	0.150402545775876	0.129952547503081	NA	NA	1.0501576736283e-20	3.11298455788337e-11	NA	NA	0.263	0.273	NA	0.0700888	GO:0000079	regulation of cyclin-dependent protein serine/threonine kinase activity	3/74	102/18866	0.00753431	0.545654	0.535113	CCNC/CCNT2/CDK5RAP3	3										R-HSA-2173793	Transcriptional activity of SMAD2/SMAD3:SMAD4 heterotrimer	2/43	44/10704	0.0134015	0.253324	0.230057	CCNC/CCNT2	2
ANKRD13D	2	0	1	1	0	NA	0.130370413523763	0.147700018728344	NA	NA	1.27697861136035e-10	2.12899662555859e-09	NA	NA	0.369	0.522	NA	0.0695176	GO:0009116	nucleoside metabolic process	3/74	104/18866	0.00794648	0.545654	0.535113	MACROD2/PRPS2/CASK	3										R-HSA-8951664	Neddylation	4/43	234/10704	0.0140983	0.253324	0.230057	CUL3/NUB1/DCAF7/ASB13	4
FNDC5	2	0	1	1	0	NA	0.160928310390877	0.114598011307179	NA	NA	4.75480858206114e-24	1.59545837929305e-09	NA	NA	0.267	0.216	NA	0.0688816	GO:1904029	regulation of cyclin-dependent protein kinase activity	3/74	106/18866	0.00837174	0.545654	0.535113	CCNC/CCNT2/CDK5RAP3	3										R-HSA-983169	Class I MHC mediated antigen processing & presentation	5/43	370/10704	0.0157292	0.253324	0.230057	CUL3/UBE2D4/UBE3C/TRIM69/ASB13	5
MLLT3	2	0	0	1	1	NA	NA	0.125811109468372	0.146888693083373	NA	NA	1.81192696990551e-07	3.95691309452562e-15	NA	NA	0.327	0.363	0.068175	GO:0090174	organelle membrane fusion	3/74	107/18866	0.0085893	0.545654	0.535113	STX8/CHMP2B/ANKRD27	3										R-HSA-2122947	NOTCH1 Intracellular Domain Regulates Transcription	2/43	48/10704	0.015819	0.253324	0.230057	CREBBP/CCNC	2
ELOF1	2	0	0	1	1	NA	NA	0.124097384536958	0.146606469489035	NA	NA	2.64398034278244e-07	5.96035632065084e-16	NA	NA	0.453	0.512	0.067676	GO:0045022	early endosome to late endosome transport	2/74	39/18866	0.0102401	0.545654	0.535113	STX8/ANKRD27	2										R-HSA-2151201	Transcriptional activation of mitochondrial biogenesis	2/43	56/10704	0.021165	0.253324	0.230057	ESRRA/CREBBP	2
CUL3	2	0	1	1	0	NA	0.16675825168464	0.10261158593745	NA	NA	8.57299348628663e-18	4.26584260983256e-06	NA	NA	0.487	0.535	NA	0.0673425	GO:0000209	protein polyubiquitination	5/74	340/18866	0.0107888	0.545654	0.535113	CUL3/UBE2D4/RNF8/UBE3C/TRIM69	5										R-HSA-2644602	Signaling by NOTCH1 PEST Domain Mutants in Cancer	2/43	58/10704	0.0226037	0.253324	0.230057	CREBBP/CCNC	2
KIAA1549	2	0	0	1	1	NA	NA	0.118057352752078	0.146764912243055	NA	NA	1.20882220195308e-06	4.78024722457698e-19	NA	NA	0.253	0.332	0.0662056	GO:0043087	regulation of GTPase activity	6/74	481/18866	0.0114507	0.545654	0.535113	SNX13/RAB11FIP2/PLXNC1/RAB3GAP2/TBC1D13/ANKRD27	6										R-HSA-2644603	Signaling by NOTCH1 in Cancer	2/43	58/10704	0.0226037	0.253324	0.230057	CREBBP/CCNC	2
PKNOX2	2	0	0	1	1	NA	NA	0.115729652502613	0.148961778526952	NA	NA	3.40094066505439e-06	1.43916808417027e-18	NA	NA	0.29	0.385	0.0661729	GO:0098927	vesicle-mediated transport between endosomal compartments	2/74	42/18866	0.0118088	0.545654	0.535113	STX8/ANKRD27	2										R-HSA-2644606	Constitutive Signaling by NOTCH1 PEST Domain Mutants	2/43	58/10704	0.0226037	0.253324	0.230057	CREBBP/CCNC	2
TSHZ3	2	0	1	0	1	NA	0.1523573653023	NA	0.111366142008879	NA	1.98298545880395e-19	NA	3.31138645091665e-14	NA	0.242	NA	0.212	0.0659309	GO:0017145	stem cell division	2/74	44/18866	0.0129094	0.545654	0.535113	MLLT3/CUL3	2										R-HSA-2894858	Signaling by NOTCH1 HD+PEST Domain Mutants in Cancer	2/43	58/10704	0.0226037	0.253324	0.230057	CREBBP/CCNC	2
CNNM1	2	0	1	1	0	NA	0.107680717738464	0.155660108579408	NA	NA	7.41024522290222e-11	4.11317876997117e-10	NA	NA	0.267	0.384	NA	0.0658352	GO:1901657	glycosyl compound metabolic process	3/74	129/18866	0.0142283	0.545654	0.535113	MACROD2/PRPS2/CASK	3										R-HSA-2894862	Constitutive Signaling by NOTCH1 HD+PEST Domain Mutants	2/43	58/10704	0.0226037	0.253324	0.230057	CREBBP/CCNC	2
GABRA1	2	0	0	1	1	NA	NA	0.125951311463757	0.137100114763736	NA	NA	4.26525285988272e-05	1.85824433764242e-10	NA	NA	0.849	0.933	0.0657629	GO:0007080	mitotic metaphase plate congression	2/74	47/18866	0.0146407	0.545654	0.535113	CUL3/CHMP2B	2										R-HSA-112382	Formation of RNA Pol II elongation complex	2/43	61/10704	0.0248357	0.253324	0.230057	MLLT3/CCNT2	2
PRRG3	2	0	0	1	1	NA	NA	0.141548084492219	0.120883642402406	NA	NA	1.10400706406616e-08	1.79371346508745e-13	NA	NA	0.331	0.312	0.0656079	GO:0032784	regulation of DNA-templated transcription, elongation	2/74	48/18866	0.0152389	0.545654	0.535113	RNF8/CCNT2	2										R-HSA-75955	RNA Polymerase II Transcription Elongation	2/43	61/10704	0.0248357	0.253324	0.230057	MLLT3/CCNT2	2
SLC45A4	2	0	1	1	0	NA	0.151282076059959	0.108278903559881	NA	NA	8.08764304310107e-15	1.1869844997364e-06	NA	NA	0.314	0.282	NA	0.0648902	GO:0006997	nucleus organization	3/74	133/18866	0.0154324	0.545654	0.535113	CHMP2B/RNF8/KDM3A	3										R-HSA-9694516	SARS-CoV-2 Infection	2/43	68/10704	0.0303758	0.29508	0.267977	CHMP2B/MGAT5	2
TRIQK	2	0	0	1	1	NA	NA	0.123450677331823	0.131288543906116	NA	NA	3.45044970874003e-07	7.13049064787027e-15	NA	NA	0.331	0.38	0.0636848	GO:0031648	protein destabilization	2/74	50/18866	0.0164663	0.545654	0.535113	CUL3/CREBBP	2										R-HSA-400253	Circadian Clock	2/43	70/10704	0.0320412	0.297109	0.269821	CREBBP/ARNTL	2
SMARCD1	2	0	0	1	1	NA	NA	0.148639408391954	0.105575268444761	NA	NA	2.16095350799295e-09	2.00641416642223e-11	NA	NA	0.408	0.322	0.0635537	GO:0006352	DNA-templated transcription, initiation	4/74	249/18866	0.0165841	0.545654	0.535113	ESRRA/CREBBP/CCNC/MED24	4										R-HSA-170834	Signaling by TGF-beta Receptor Complex	2/43	73/10704	0.0346055	0.301559	0.273862	CCNC/CCNT2	2
SNX13	2	0	1	1	0	NA	0.106872996788544	0.146927909478946	NA	NA	3.94219493757212e-09	1.06765471919286e-09	NA	NA	0.305	0.416	NA	0.0634502	GO:0009161	ribonucleoside monophosphate metabolic process	2/74	51/18866	0.0170954	0.545654	0.535113	PRPS2/CASK	2										R-HSA-1980143	Signaling by NOTCH1	2/43	74/10704	0.0354776	0.301559	0.273862	CREBBP/CCNC	2
STX8	2	0	1	1	0	NA	0.119766379284656	0.133017699201127	NA	NA	1.84026745645472e-09	4.18137839936129e-09	NA	NA	0.356	0.445	NA	0.063196	GO:0043401	steroid hormone mediated signaling pathway	3/74	139/18866	0.0173435	0.545654	0.535113	ESRRA/ARNTL/KDM3A	3										R-HSA-9617629	Regulation of FOXO transcriptional activity by acetylation	1/43	10/10704	0.0394697	0.321728	0.292178	CREBBP	1
OSBPL2	2	0	1	0	1	NA	0.131942855877021	NA	0.120131461009612	NA	1.23364759144719e-10	NA	3.05713947210785e-11	NA	0.373	NA	0.397	0.0630186	GO:0048284	organelle fusion	3/74	140/18866	0.0176744	0.545654	0.535113	STX8/CHMP2B/ANKRD27	3										R-HSA-1234158	Regulation of gene expression by Hypoxia-inducible Factor	1/43	11/10704	0.043332	0.321728	0.292178	CREBBP	1
RBM23	2	0	1	1	0	NA	0.125494657862913	0.122632298844574	NA	NA	3.07638562382936e-11	1.37104165696308e-07	NA	NA	0.347	0.498	NA	0.0620317	GO:0008333	endosome to lysosome transport	2/74	53/18866	0.0183838	0.545654	0.535113	STX8/CHMP2B	2										R-HSA-674695	RNA Polymerase II Pre-transcription Events	2/43	84/10704	0.0446551	0.321728	0.292178	MLLT3/CCNT2	2
CREBBP	2	0	1	1	0	NA	0.127475770810893	0.120484433213657	NA	NA	3.79262788123845e-10	6.13307899833953e-06	NA	NA	0.373	0.514	NA	0.0619901	GO:0070534	protein K63-linked ubiquitination	2/74	57/18866	0.0210795	0.545654	0.535113	UBE2D4/RNF8	2										R-HSA-8866907	Activation of the TFAP2 (AP-2) family of transcription factors	1/43	12/10704	0.047179	0.321728	0.292178	CREBBP	1
CHMP2B	2	0	1	1	0	NA	0.107816660159506	0.140017484215227	NA	NA	5.19658404122122e-10	9.44294945928672e-09	NA	NA	0.305	0.396	NA	0.0619585	GO:0070936	protein K48-linked ubiquitination	2/74	57/18866	0.0210795	0.545654	0.535113	UBE2D4/RNF8	2
PRPS2	2	0	1	1	0	NA	0.144939876712379	0.102700356823886	NA	NA	2.79632212873338e-15	4.17340157787987e-07	NA	NA	0.297	0.278	NA	0.0619101	GO:0043547	positive regulation of GTPase activity	5/74	406/18866	0.0216068	0.545654	0.535113	SNX13/RAB11FIP2/RAB3GAP2/TBC1D13/ANKRD27	5
RAB11FIP2	2	0	1	1	0	NA	0.128274356216404	0.119147641199083	NA	NA	1.96656857969266e-10	1.94505505021561e-06	NA	NA	0.36	0.478	NA	0.0618555	GO:0045815	positive regulation of gene expression, epigenetic	2/74	59/18866	0.0224853	0.545654	0.535113	ELOF1/SMARCD1	2
TMEM163	2	0	0	1	1	NA	NA	0.145018731209144	0.100813699163569	NA	NA	4.12212305779549e-09	7.79609329482237e-11	NA	NA	0.294	0.245	0.0614581	GO:0042278	purine nucleoside metabolic process	2/74	61/18866	0.0239289	0.545654	0.535113	MACROD2/CASK	2
DAGLA	2	0	1	1	0	NA	0.138055924225232	0.107061170460536	NA	NA	7.22061774125542e-13	2.77388641411742e-05	NA	NA	0.331	0.371	NA	0.0612793	GO:0051310	metaphase plate congression	2/74	61/18866	0.0239289	0.545654	0.535113	CUL3/CHMP2B	2
ARL15	2	0	0	1	1	NA	NA	0.11529761451778	0.129265168934641	NA	NA	7.79359767280993e-08	5.62122591209334e-13	NA	NA	0.245	0.284	0.0611407	GO:0061025	membrane fusion	3/74	169/18866	0.0288059	0.545654	0.535113	STX8/CHMP2B/ANKRD27	3
PLXNC1	2	0	0	1	1	NA	NA	0.118885263318799	0.124278751603501	NA	NA	1.25961072111706e-07	1.06262429724475e-12	NA	NA	0.335	0.365	0.060791	GO:0050891	multicellular organismal water homeostasis	2/74	71/18866	0.0316909	0.545654	0.535113	RAB11FIP2/UGCG	2
CCNC	2	0	1	1	0	NA	0.126235252918576	0.11643548744688	NA	NA	1.25309713784279e-11	6.31518750909935e-07	NA	NA	0.322	0.351	NA	0.0606677	GO:0009123	nucleoside monophosphate metabolic process	2/74	72/18866	0.0325151	0.545654	0.535113	PRPS2/CASK	2
ARCN1	2	1	0	0	1	0.11337466252023	NA	NA	0.127843809934603	5.77177104942416e-09	NA	NA	1.29646715733209e-11	0.394	NA	NA	0.474	0.0603046	GO:0051966	regulation of synaptic transmission, glutamatergic	2/74	73/18866	0.0333477	0.545654	0.535113	TSHZ3/GRM2	2
SHF	2	0	1	0	1	NA	0.120724380930493	NA	0.120234133098044	NA	2.58188786471804e-11	NA	5.78360045515583e-12	NA	0.258	NA	0.305	0.0602396	GO:0010256	endomembrane system organization	5/74	468/18866	0.0366852	0.545654	0.535113	OSBPL2/CHMP2B/RAB3GAP2/UGCG/TANGO2	5
RAB3GAP2	2	0	1	1	0	NA	0.124130981794099	0.114801152376653	NA	NA	1.24915868722303e-10	4.80949633273557e-06	NA	NA	0.301	0.416	NA	0.059733	GO:0030104	water homeostasis	2/74	79/18866	0.0385153	0.545654	0.535113	RAB11FIP2/UGCG	2
UBE2D4	2	0	1	1	0	NA	0.132173214361912	0.105455668345788	NA	NA	6.25865733937729e-08	0.000100323458212043	NA	NA	0.254	0.322	NA	0.0594072	GO:0050000	chromosome localization	2/74	79/18866	0.0385153	0.545654	0.535113	CUL3/CHMP2B	2
NT5C3B	2	0	0	1	1	NA	NA	0.122464007363332	0.114985103734135	NA	NA	5.46727426683702e-07	1.29605617053494e-09	NA	NA	0.543	0.584	0.0593623	GO:0051303	establishment of chromosome localization	2/74	79/18866	0.0385153	0.545654	0.535113	CUL3/CHMP2B	2
CHIC1	2	0	0	1	1	NA	NA	0.116016458464114	0.120730667518671	NA	NA	1.05372311316194e-07	4.7866505085765e-12	NA	NA	0.376	0.385	0.0591868	GO:0035646	endosome to melanosome transport	1/74	10/18866	0.0385479	0.545654	0.535113	ANKRD27	1
ADNP2	2	0	1	1	0	NA	0.125527498536389	0.111005317103429	NA	NA	3.04212531959486e-09	5.82852784590668e-08	NA	NA	0.258	0.302	NA	0.0591332	GO:0035871	protein K11-linked deubiquitination	1/74	10/18866	0.0385479	0.545654	0.535113	OTUD7A	1
CCKBR	2	0	1	0	1	NA	0.10888531360533	NA	0.127585154021088	NA	4.16790243221072e-09	NA	6.48428142909916e-13	NA	0.237	NA	0.401	0.0591176	GO:0043485	endosome to pigment granule transport	1/74	10/18866	0.0385479	0.545654	0.535113	ANKRD27	1
FAM136A	2	0	1	1	0	NA	0.116753758282806	0.117528852062102	NA	NA	4.4196328810559e-11	1.08473063588371e-07	NA	NA	0.258	0.306	NA	0.0585707	GO:0046710	GDP metabolic process	1/74	10/18866	0.0385479	0.545654	0.535113	CASK	1
CAPN1	2	0	0	1	1	NA	NA	0.101717459696433	0.131801244190891	NA	NA	1.76810915560307e-05	2.53631718233924e-13	NA	NA	0.514	0.553	0.0583797	GO:0048757	pigment granule maturation	1/74	10/18866	0.0385479	0.545654	0.535113	ANKRD27	1
RNF8	2	0	1	0	1	NA	0.128442669194784	NA	0.104369685054602	NA	1.13029666454265e-10	NA	2.51352625361849e-09	NA	0.28	NA	0.325	0.0582031	GO:1904896	ESCRT complex disassembly	1/74	10/18866	0.0385479	0.545654	0.535113	CHMP2B	1
NFX1	2	0	0	1	1	NA	NA	0.127146258394245	0.1054249587214	NA	NA	3.54176974884791e-09	4.85740208286014e-11	NA	NA	0.371	0.279	0.0581428	GO:1904903	ESCRT III complex disassembly	1/74	10/18866	0.0385479	0.545654	0.535113	CHMP2B	1
CCNT2	2	0	0	1	1	NA	NA	0.105910157108406	0.126450456623232	NA	NA	9.7592287297038e-07	1.21008654540358e-13	NA	NA	0.355	0.339	0.0580902	GO:2000786	positive regulation of autophagosome assembly	1/74	10/18866	0.0385479	0.545654	0.535113	RAB3GAP2	1
UBE3C	2	0	1	0	1	NA	0.101509283508512	NA	0.129379949766368	NA	1.25463621647686e-07	NA	1.10138485106437e-11	NA	0.318	NA	0.425	0.0577223	GO:0032984	protein-containing complex disassembly	4/74	330/18866	0.0407189	0.545654	0.535113	SMARCD1/CHMP2B/MICAL1/MRPL3	4
OTUD7A	2	0	1	0	1	NA	0.11035230510446	NA	0.117506236326473	NA	1.15815091966811e-08	NA	4.31963218740183e-10	NA	0.267	NA	0.341	0.0569646	GO:0033210	leptin-mediated signaling pathway	1/74	11/18866	0.0423211	0.545654	0.535113	UGCG	1
APPBP2	2	0	0	1	1	NA	NA	0.124317010488492	0.103364856162006	NA	NA	1.8940108993324e-06	1.70004215473446e-07	NA	NA	0.498	0.433	0.0569205	GO:0034776	response to histamine	1/74	11/18866	0.0423211	0.545654	0.535113	GABRA1	1
KCNIP3	2	0	1	1	0	NA	0.10056065307685	0.126908574878599	NA	NA	7.74833320857345e-10	2.12926296927737e-08	NA	NA	0.246	0.392	NA	0.0568673	GO:0035542	regulation of SNARE complex assembly	1/74	11/18866	0.0423211	0.545654	0.535113	ANKRD27	1
TBC1D13	2	0	1	1	0	NA	0.112662217793029	0.114402190130451	NA	NA	2.0278118179665e-09	0.000138651288379507	NA	NA	0.343	0.506	NA	0.0567661	GO:0051573	negative regulation of histone H3-K9 methylation	1/74	11/18866	0.0423211	0.545654	0.535113	KDM3A	1
MICAL1	2	0	0	1	1	NA	NA	0.107309957624401	0.119633401356675	NA	NA	1.0929051902805e-06	6.92158068428495e-11	NA	NA	0.388	0.389	0.0567358	GO:0098917	retrograde trans-synaptic signaling	1/74	11/18866	0.0423211	0.545654	0.535113	DAGLA	1
NUB1	2	0	1	0	1	NA	0.11175478329145	NA	0.114819764845575	NA	1.22847490867261e-09	NA	1.55663496694919e-11	NA	0.305	NA	0.346	0.0566436	GO:2000035	regulation of stem cell division	1/74	11/18866	0.0423211	0.545654	0.535113	MLLT3	1
GRM2	2	0	0	1	1	NA	NA	0.108860760917035	0.117006473805117	NA	NA	1.86454700852558e-06	5.00859194542939e-11	NA	NA	0.245	0.255	0.0564668	GO:0009755	hormone-mediated signaling pathway	3/74	200/18866	0.0439709	0.545654	0.535113	ESRRA/ARNTL/KDM3A	3
ARNTL	2	0	1	1	0	NA	0.104187968783789	0.120013289790467	NA	NA	5.57944657609404e-09	2.9968057519443e-07	NA	NA	0.275	0.347	NA	0.0560503	GO:0016050	vesicle organization	4/74	340/18866	0.0446063	0.545654	0.535113	CUL3/STX8/CHMP2B/ANKRD27	4
TRIM69	2	1	0	0	1	0.101876063298685	NA	NA	0.121678326869872	6.41201474291557e-07	NA	NA	2.15770937496764e-10	0.427	NA	NA	0.502	0.0558886	GO:0033523	histone H2B ubiquitination	1/74	12/18866	0.0460797	0.545654	0.535113	RNF8	1
PRR12	2	0	0	1	1	NA	NA	0.104480647955621	0.118785893638433	NA	NA	3.41706946832701e-05	4.96905679679637e-12	NA	NA	0.408	0.392	0.0558166	GO:0035092	sperm chromatin condensation	1/74	12/18866	0.0460797	0.545654	0.535113	RNF8	1
DCAF7	2	0	1	1	0	NA	0.102852991042564	0.120249718363677	NA	NA	3.30021836585251e-08	2.5651911648999e-06	NA	NA	0.339	0.522	NA	0.0557757	GO:0043476	pigment accumulation	1/74	12/18866	0.0460797	0.545654	0.535113	ANKRD27	1
ARVCF	2	0	1	1	0	NA	0.111669169052037	0.110784381890806	NA	NA	2.75884428909049e-09	3.34282359490797e-06	NA	NA	0.237	0.351	NA	0.0556134	GO:0043482	cellular pigment accumulation	1/74	12/18866	0.0460797	0.545654	0.535113	ANKRD27	1
MGAT5	2	1	0	0	1	0.107572196790792	NA	NA	0.114830144241968	1.9923524373914e-09	NA	NA	5.11579335812956e-09	0.459	NA	NA	0.459	0.0556006	GO:0044090	positive regulation of vacuole organization	1/74	12/18866	0.0460797	0.545654	0.535113	RAB3GAP2	1
CDK5RAP3	2	0	1	0	1	NA	0.101035553129055	NA	0.119902307051214	NA	1.21784015492277e-08	NA	2.20535158990482e-11	NA	0.407	NA	0.505	0.0552345	GO:1902287	semaphorin-plexin signaling pathway involved in axon guidance	1/74	12/18866	0.0460797	0.545654	0.535113	PLXNC1	1
DMTF1	2	0	0	1	1	NA	NA	0.117017198869634	0.103126474691216	NA	NA	6.55605360757784e-07	2.88724349338932e-10	NA	NA	0.404	0.334	0.0550359	GO:0071383	cellular response to steroid hormone stimulus	3/74	206/18866	0.0472868	0.545654	0.535113	ESRRA/ARNTL/KDM3A	3
SNX30	2	0	1	1	0	NA	0.104123602214203	0.115838614392737	NA	NA	1.49035623516665e-09	6.16126462016899e-07	NA	NA	0.237	0.388	NA	0.0549906	GO:0002087	regulation of respiratory gaseous exchange by nervous system process	1/74	13/18866	0.0498237	0.545654	0.535113	TSHZ3	1
MRPL3	2	0	0	1	1	NA	NA	0.114660152055995	0.10412549094998	NA	NA	6.77729372773248e-07	6.7975745712202e-08	NA	NA	0.4	0.375	0.0546964	GO:0034244	negative regulation of transcription elongation from RNA polymerase II promoter	1/74	13/18866	0.0498237	0.545654	0.535113	RNF8	1
CBX7	2	0	0	1	1	NA	NA	0.107455604750694	0.110817758390963	NA	NA	0.000293447120463267	4.38955368575058e-08	NA	NA	0.588	0.671	0.0545683	GO:0042921	glucocorticoid receptor signaling pathway	1/74	13/18866	0.0498237	0.545654	0.535113	ARNTL	1
TCEAL8	2	0	1	0	1	NA	0.108287959429399	NA	0.107883082031912	NA	8.31706266016457e-09	NA	5.5689146665459e-10	NA	0.352	NA	0.406	0.0540428	GO:0045842	positive regulation of mitotic metaphase/anaphase transition	1/74	13/18866	0.0498237	0.545654	0.535113	CUL3	1
UGCG	2	0	1	1	0	NA	0.100017897003088	0.116042054879412	NA	NA	9.26219922546413e-09	5.29865990559066e-07	NA	NA	0.331	0.343	NA	0.054015	GO:1901970	positive regulation of mitotic sister chromatid separation	1/74	13/18866	0.0498237	0.545654	0.535113	CUL3	1
CASK	2	0	0	1	1	NA	NA	0.110169319715802	0.105716317153544	NA	NA	2.23598571670966e-06	3.73412657279887e-10	NA	NA	0.339	0.344	0.0539714	GO:1902285	semaphorin-plexin signaling pathway involved in neuron projection guidance	1/74	13/18866	0.0498237	0.545654	0.535113	PLXNC1	1
SPOCK2	2	0	1	1	0	NA	0.103981142587456	0.111576806441048	NA	NA	6.28968504298398e-07	7.49337379469936e-05	NA	NA	0.881	0.931	NA	0.0538895	GO:1905244	regulation of modification of synaptic structure	1/74	13/18866	0.0498237	0.545654	0.535113	CHMP2B	1
TANGO2	2	0	1	1	0	NA	0.108495628256223	0.105128439939442	NA	NA	2.41848069962047e-12	2.26276178886383e-06	NA	NA	0.25	0.278	NA	0.053406	GO:2000052	positive regulation of non-canonical Wnt signaling pathway	1/74	13/18866	0.0498237	0.545654	0.535113	MLLT3	1
FBXO25	2	0	1	0	1	NA	0.101188096794975	NA	0.112299204777503	NA	2.83319048470218e-09	NA	1.60084723991875e-12	NA	0.258	NA	0.327	0.0533718
MLX	2	0	1	1	0	NA	0.109952430432983	0.102700356823886	NA	NA	1.04824755330219e-10	3.64992427285725e-06	NA	NA	0.22	0.269	NA	0.0531632
ANKRD27	2	0	0	1	1	NA	NA	0.105611401451669	0.106859286379664	NA	NA	7.24415393514914e-08	9.98492605832668e-11	NA	NA	0.29	0.284	0.0531177
KDM3A	2	0	0	1	1	NA	NA	0.110192859374243	0.101287201976024	NA	NA	1.35869849527906e-05	2.45284228860898e-09	NA	NA	0.282	0.361	0.05287
SPIN3	2	0	1	1	0	NA	0.10411620820315	0.105611401451669	NA	NA	2.8853044581709e-10	3.40849846166127e-05	NA	NA	0.237	0.257	NA	0.0524319
MED24	2	0	1	0	1	NA	0.101820096421913	NA	0.107539268266779	NA	5.0094975403886e-08	NA	6.2999238078864e-11	NA	0.343	NA	0.433	0.0523398
ASB13	2	0	1	1	0	NA	0.108452103402535	0.100366469596174	NA	NA	4.75640467292602e-09	7.39330269908324e-06	NA	NA	0.263	0.314	NA	0.0522046
PGD	2	0	1	1	0	NA	0.101605432311971	0.104824271677286	NA	NA	2.86850348901547e-08	3.79252048986644e-05	NA	NA	0.381	0.514	NA	0.0516074
NEFM	1	1	0	0	0	0.271600799823858	NA	NA	NA	1.50204740882252e-28	NA	NA	NA	0.92	NA	NA	NA	0.0679002
CPNE7	1	0	0	1	0	NA	NA	0.211312663410216	NA	NA	NA	1.77607309335585e-13	NA	NA	NA	0.494	NA	0.0528282
PRDM8	1	0	0	1	0	NA	NA	0.210090727952859	NA	NA	NA	1.61612444757867e-17	NA	NA	NA	0.408	NA	0.0525227
NTNG1	1	0	0	0	1	NA	NA	NA	0.202536079328126	NA	NA	NA	5.14094867265326e-40	NA	NA	NA	0.305	0.050634
CHD3	1	0	0	1	0	NA	NA	0.194653352956128	NA	NA	NA	8.26690712859337e-09	NA	NA	NA	0.792	NA	0.0486633
UBE3A	1	0	0	1	0	NA	NA	0.186381469002909	NA	NA	NA	3.02669113486461e-11	NA	NA	NA	0.588	NA	0.0465954
MLXIPL	1	0	0	1	0	NA	NA	0.175327549390351	NA	NA	NA	1.52893191851009e-12	NA	NA	NA	0.429	NA	0.0438319
NEURL1B	1	0	0	0	1	NA	NA	NA	0.17426580178234	NA	NA	NA	2.31949171175173e-27	NA	NA	NA	0.274	0.0435665
R3HDM1	1	0	0	0	1	NA	NA	NA	0.17296154416911	NA	NA	NA	5.74948209503178e-14	NA	NA	NA	0.709	0.0432404
GLS2	1	0	0	1	0	NA	NA	0.170533797306314	NA	NA	NA	5.50258754156496e-14	NA	NA	NA	0.416	NA	0.0426334
FOXP1	1	0	0	0	1	NA	NA	NA	0.170106936706189	NA	NA	NA	3.12193911828655e-16	NA	NA	NA	0.505	0.0425267
SSB	1	0	0	1	0	NA	NA	0.164623814213378	NA	NA	NA	2.65832635258158e-08	NA	NA	NA	0.531	NA	0.041156
ERVK3-1	1	0	1	0	0	NA	0.161266110191409	NA	NA	NA	5.70608814448252e-16	NA	NA	NA	0.403	NA	NA	0.0403165
PIP4P2	1	0	1	0	0	NA	0.160093266413778	NA	NA	NA	1.06382596485458e-13	NA	NA	NA	0.369	NA	NA	0.0400233
STOX2	1	0	0	1	0	NA	NA	0.155300238176533	NA	NA	NA	1.28283215915809e-09	NA	NA	NA	0.588	NA	0.0388251
PTP4A3	1	0	0	1	0	NA	NA	0.154838827382123	NA	NA	NA	4.14157562235039e-11	NA	NA	NA	0.282	NA	0.0387097
C11orf68	1	0	0	1	0	NA	NA	0.151217906451966	NA	NA	NA	9.28009589535181e-07	NA	NA	NA	0.653	NA	0.0378045
DNAJB14	1	0	0	0	1	NA	NA	NA	0.149966298952957	NA	NA	NA	3.72135822732124e-15	NA	NA	NA	0.603	0.0374916
PNPLA8	1	0	0	0	1	NA	NA	NA	0.149596750160001	NA	NA	NA	7.16132771577948e-16	NA	NA	NA	0.524	0.0373992
KRT222	1	0	0	1	0	NA	NA	0.14946431246432	NA	NA	NA	3.9221801548973e-10	NA	NA	NA	0.359	NA	0.0373661
ORC4	1	0	0	1	0	NA	NA	0.149430210716067	NA	NA	NA	9.98012027696244e-10	NA	NA	NA	0.494	NA	0.0373576
YPEL5	1	0	1	0	0	NA	0.148436455128055	NA	NA	NA	9.19036155966612e-11	NA	NA	NA	0.881	NA	NA	0.0371091
CORO6	1	0	0	1	0	NA	NA	0.148336729683091	NA	NA	NA	1.49878277137012e-07	NA	NA	NA	0.469	NA	0.0370842
CDS1	1	0	1	0	0	NA	0.146756314691828	NA	NA	NA	8.7673781519057e-11	NA	NA	NA	0.301	NA	NA	0.0366891
PLCH1	1	0	1	0	0	NA	0.146031108228657	NA	NA	NA	8.63331286196961e-19	NA	NA	NA	0.203	NA	NA	0.0365078
KDM5D	1	0	0	1	0	NA	NA	0.146019231542728	NA	NA	NA	7.80905238448824e-10	NA	NA	NA	0.376	NA	0.0365048
LAMA5	1	0	0	1	0	NA	NA	0.145750883225004	NA	NA	NA	1.29478261199365e-10	NA	NA	NA	0.347	NA	0.0364377
MRPS10	1	0	0	1	0	NA	NA	0.14557369800896	NA	NA	NA	2.67042454395322e-08	NA	NA	NA	0.42	NA	0.0363934
ZBTB44	1	0	0	1	0	NA	NA	0.145504960510566	NA	NA	NA	3.64104722191318e-08	NA	NA	NA	0.563	NA	0.0363762
UBP1	1	0	0	1	0	NA	NA	0.145325028113252	NA	NA	NA	1.91197053119424e-09	NA	NA	NA	0.51	NA	0.0363313
RHBDL3	1	0	0	1	0	NA	NA	0.145039622792275	NA	NA	NA	1.00885945629045e-08	NA	NA	NA	0.371	NA	0.0362599
CNTNAP2	1	0	0	0	1	NA	NA	NA	0.145016179398907	NA	NA	NA	3.45512912079261e-10	NA	NA	NA	0.661	0.036254
ZDHHC23	1	0	0	1	0	NA	NA	0.144774112812621	NA	NA	NA	1.1094549221548e-09	NA	NA	NA	0.282	NA	0.0361935
SHARPIN	1	0	0	1	0	NA	NA	0.144451951968138	NA	NA	NA	2.63598814188619e-10	NA	NA	NA	0.429	NA	0.036113
UNC79	1	0	0	1	0	NA	NA	0.14421284300654	NA	NA	NA	1.18345227783652e-11	NA	NA	NA	0.343	NA	0.0360532
SCG2	1	0	0	0	1	NA	NA	NA	0.143936314421104	NA	NA	NA	9.9317838520283e-09	NA	NA	NA	0.623	0.0359841
RTL6	1	0	1	0	0	NA	0.143921501940024	NA	NA	NA	1.47500564638858e-11	NA	NA	NA	0.377	NA	NA	0.0359804
TM7SF2	1	0	0	0	1	NA	NA	NA	0.143677279431648	NA	NA	NA	5.71666737058189e-14	NA	NA	NA	0.541	0.0359193
SART3	1	0	1	0	0	NA	0.142875379375804	NA	NA	NA	1.82069601278332e-14	NA	NA	NA	0.356	NA	NA	0.0357188
COA5	1	0	1	0	0	NA	0.142308725425475	NA	NA	NA	5.6155892425952e-13	NA	NA	NA	0.424	NA	NA	0.0355772
GREM2	1	0	1	0	0	NA	0.141685064992303	NA	NA	NA	6.92164316686247e-22	NA	NA	NA	0.199	NA	NA	0.0354213
NAB2	1	0	1	0	0	NA	0.141676541696003	NA	NA	NA	6.0086999650296e-11	NA	NA	NA	0.326	NA	NA	0.0354191
LRFN5	1	0	0	0	1	NA	NA	NA	0.141487016377449	NA	NA	NA	2.0152600536692e-17	NA	NA	NA	0.373	0.0353718
ARL4C	1	0	0	0	1	NA	NA	NA	0.140907488802175	NA	NA	NA	4.766181239086e-14	NA	NA	NA	0.404	0.0352269
VPS29	1	0	0	0	1	NA	NA	NA	0.140551300018355	NA	NA	NA	7.80295086613286e-12	NA	NA	NA	0.587	0.0351378
XKR4	1	0	0	1	0	NA	NA	0.140506538419901	NA	NA	NA	1.30116233412159e-11	NA	NA	NA	0.327	NA	0.0351266
YPEL1	1	0	0	0	1	NA	NA	NA	0.140023177481655	NA	NA	NA	1.11934004182548e-13	NA	NA	NA	0.418	0.0350058
URB1	1	0	0	1	0	NA	NA	0.139917802978404	NA	NA	NA	6.14891458429036e-10	NA	NA	NA	0.371	NA	0.0349795
KCND3	1	0	1	0	0	NA	0.139719284202202	NA	NA	NA	3.13732760208398e-06	NA	NA	NA	0.606	NA	NA	0.0349298
LINC02609	1	0	1	0	0	NA	0.139666679654111	NA	NA	NA	1.90279056960093e-17	NA	NA	NA	0.271	NA	NA	0.0349167
ELMO2	1	0	0	0	1	NA	NA	NA	0.1393036392202	NA	NA	NA	4.48485615116196e-13	NA	NA	NA	0.541	0.0348259
APLP2	1	0	0	1	0	NA	NA	0.139254128504292	NA	NA	NA	2.77982028198122e-06	NA	NA	NA	0.967	NA	0.0348135
ZDHHC18	1	0	1	0	0	NA	0.138936240237659	NA	NA	NA	1.48881372073728e-12	NA	NA	NA	0.314	NA	NA	0.0347341
SGPP2	1	0	1	0	0	NA	0.138663569930114	NA	NA	NA	1.72406763347068e-14	NA	NA	NA	0.263	NA	NA	0.0346659
GRM7	1	0	0	0	1	NA	NA	NA	0.138156089292401	NA	NA	NA	1.05822649346781e-16	NA	NA	NA	0.296	0.034539
FLRT3	1	0	1	0	0	NA	0.137956754933253	NA	NA	NA	2.19525170148191e-18	NA	NA	NA	0.195	NA	NA	0.0344892
RUSC2	1	0	0	1	0	NA	NA	0.136732545974524	NA	NA	NA	1.26050945543885e-06	NA	NA	NA	0.706	NA	0.0341831
SATB1	1	0	0	1	0	NA	NA	0.136406765148573	NA	NA	NA	1.12103129605064e-06	NA	NA	NA	0.714	NA	0.0341017
LGALS1	1	0	0	1	0	NA	NA	0.136233131389007	NA	NA	NA	1.67224560508767e-06	NA	NA	NA	0.882	NA	0.0340583
GSK3A	1	0	0	1	0	NA	NA	0.135737842083762	NA	NA	NA	2.62913474827555e-06	NA	NA	NA	0.784	NA	0.0339345
RALGPS1	1	0	0	1	0	NA	NA	0.135378697501709	NA	NA	NA	5.85866402089462e-08	NA	NA	NA	0.408	NA	0.0338447
ZFPM1	1	0	0	1	0	NA	NA	0.135103165672709	NA	NA	NA	2.27785398957311e-09	NA	NA	NA	0.388	NA	0.0337758
TAFA5	1	0	0	0	1	NA	NA	NA	0.134570265415717	NA	NA	NA	7.22719802874088e-09	NA	NA	NA	0.663	0.0336426
TMEM263	1	0	1	0	0	NA	0.134424579715187	NA	NA	NA	3.63392608847021e-14	NA	NA	NA	0.322	NA	NA	0.0336061
LAPTM4B	1	0	0	0	1	NA	NA	NA	0.134406161323202	NA	NA	NA	1.16587622402385e-10	NA	NA	NA	0.505	0.0336015
TFG	1	0	1	0	0	NA	0.133986093379994	NA	NA	NA	1.69743534206036e-10	NA	NA	NA	0.449	NA	NA	0.0334965
PFDN1	1	0	0	1	0	NA	NA	0.133776360575774	NA	NA	NA	1.25455011412179e-07	NA	NA	NA	0.604	NA	0.0334441
CYGB	1	0	0	1	0	NA	NA	0.133627887987253	NA	NA	NA	6.52875721872832e-08	NA	NA	NA	0.359	NA	0.033407
SCN3B	1	0	0	0	1	NA	NA	NA	0.133476440576327	NA	NA	NA	3.3832771166125e-09	NA	NA	NA	0.954	0.0333691
SEC22B	1	0	0	1	0	NA	NA	0.133122074539603	NA	NA	NA	3.78570746624648e-07	NA	NA	NA	0.535	NA	0.0332805
MRPS12	1	0	1	0	0	NA	0.132990614299054	NA	NA	NA	2.54157093483469e-14	NA	NA	NA	0.331	NA	NA	0.0332477
MRPL22	1	0	1	0	0	NA	0.132945664216113	NA	NA	NA	3.12161445315008e-13	NA	NA	NA	0.331	NA	NA	0.0332364
PIK3C2A	1	0	0	1	0	NA	NA	0.132905706928477	NA	NA	NA	4.53054747813387e-08	NA	NA	NA	0.461	NA	0.0332264
UBQLN4	1	0	0	0	1	NA	NA	NA	0.132875487078248	NA	NA	NA	1.1018339528595e-12	NA	NA	NA	0.555	0.0332189
FJX1	1	0	0	1	0	NA	NA	0.132829175684559	NA	NA	NA	6.58263447443412e-10	NA	NA	NA	0.261	NA	0.0332073
C17orf75	1	0	1	0	0	NA	0.132821287794818	NA	NA	NA	7.28396055303644e-15	NA	NA	NA	0.254	NA	NA	0.0332053
PHACTR2	1	0	0	1	0	NA	NA	0.132733394831078	NA	NA	NA	1.71304387488289e-08	NA	NA	NA	0.269	NA	0.0331833
RNF34	1	0	0	0	1	NA	NA	NA	0.13237378598373	NA	NA	NA	8.42542501884776e-12	NA	NA	NA	0.418	0.0330934
RORA	1	0	1	0	0	NA	0.131088669923717	NA	NA	NA	1.26184786147124e-13	NA	NA	NA	0.246	NA	NA	0.0327722
NFYC	1	0	1	0	0	NA	0.130848334826769	NA	NA	NA	1.38048011331952e-11	NA	NA	NA	0.36	NA	NA	0.0327121
KCNG1	1	0	0	1	0	NA	NA	0.130498949075009	NA	NA	NA	7.8627502797646e-08	NA	NA	NA	0.363	NA	0.0326247
RIMKLA	1	0	0	0	1	NA	NA	NA	0.130361843407812	NA	NA	NA	1.49241377486008e-14	NA	NA	NA	0.339	0.0325905
ADAMTSL2	1	0	0	0	1	NA	NA	NA	0.130359130252128	NA	NA	NA	2.90774805956187e-16	NA	NA	NA	0.315	0.0325898
GUCY1A2	1	0	0	0	1	NA	NA	NA	0.130068445401769	NA	NA	NA	2.39358857713789e-14	NA	NA	NA	0.382	0.0325171
BEND5	1	0	1	0	0	NA	0.129585273243889	NA	NA	NA	3.55297101174712e-16	NA	NA	NA	0.242	NA	NA	0.0323963
TBCD	1	0	0	1	0	NA	NA	0.129382788647503	NA	NA	NA	1.0890117468214e-07	NA	NA	NA	0.563	NA	0.0323457
ENDOG	1	0	0	0	1	NA	NA	NA	0.129093286677221	NA	NA	NA	1.11754588519708e-11	NA	NA	NA	0.442	0.0322733
UBXN11	1	0	0	1	0	NA	NA	0.129056863308953	NA	NA	NA	3.05768873373075e-08	NA	NA	NA	0.29	NA	0.0322642
ATP1A1	1	0	0	0	1	NA	NA	NA	0.129015909075933	NA	NA	NA	5.83427794935305e-10	NA	NA	NA	0.974	0.032254
UTP11	1	0	0	1	0	NA	NA	0.129000057161538	NA	NA	NA	2.18744095015684e-07	NA	NA	NA	0.322	NA	0.03225
ALKBH6	1	0	0	1	0	NA	NA	0.128996177142588	NA	NA	NA	3.44341186041117e-09	NA	NA	NA	0.347	NA	0.032249
LRRC49	1	0	1	0	0	NA	0.128512737823142	NA	NA	NA	1.8093931426597e-14	NA	NA	NA	0.267	NA	NA	0.0321282
SPG21	1	0	0	0	1	NA	NA	NA	0.128482045469593	NA	NA	NA	1.37611939565694e-11	NA	NA	NA	0.471	0.0321205
EPM2AIP1	1	0	0	0	1	NA	NA	NA	0.128397200367672	NA	NA	NA	7.08170339937673e-09	NA	NA	NA	0.543	0.0320993
TTPAL	1	0	0	1	0	NA	NA	0.128233155952471	NA	NA	NA	2.52305358141225e-09	NA	NA	NA	0.278	NA	0.0320583
MRPL1	1	0	0	1	0	NA	NA	0.128182387967703	NA	NA	NA	1.62173648724663e-08	NA	NA	NA	0.384	NA	0.0320456
PPP1R9A	1	0	0	0	1	NA	NA	NA	0.128025040199175	NA	NA	NA	3.16531605728987e-11	NA	NA	NA	0.543	0.0320063
ZNF133	1	0	0	1	0	NA	NA	0.127954224145089	NA	NA	NA	6.52975046606904e-08	NA	NA	NA	0.253	NA	0.0319886
MRS2	1	0	0	1	0	NA	NA	0.12794313041889	NA	NA	NA	1.84592438107393e-08	NA	NA	NA	0.31	NA	0.0319858
MMP24	1	0	0	0	1	NA	NA	NA	0.127765737721383	NA	NA	NA	6.97003246380336e-15	NA	NA	NA	0.272	0.0319414
MRPL9	1	0	0	1	0	NA	NA	0.127419685961992	NA	NA	NA	1.09853576613164e-08	NA	NA	NA	0.412	NA	0.0318549
GUF1	1	0	0	1	0	NA	NA	0.127409642293557	NA	NA	NA	2.35369477674463e-07	NA	NA	NA	0.351	NA	0.0318524
KIAA1324L	1	0	1	0	0	NA	0.127274915189694	NA	NA	NA	1.1155875487589e-15	NA	NA	NA	0.225	NA	NA	0.0318187
FZD1	1	0	0	0	1	NA	NA	NA	0.127263491991316	NA	NA	NA	2.59020724057002e-19	NA	NA	NA	0.214	0.0318159
COQ9	1	0	1	0	0	NA	0.127110353540415	NA	NA	NA	1.71526079116448e-12	NA	NA	NA	0.335	NA	NA	0.0317776
PFDN6	1	0	1	0	0	NA	0.126850868431551	NA	NA	NA	6.48181100195457e-11	NA	NA	NA	0.343	NA	NA	0.0317127
DRG2	1	0	0	1	0	NA	NA	0.126616629516636	NA	NA	NA	1.45196968140602e-08	NA	NA	NA	0.347	NA	0.0316542
MCRIP2	1	0	0	0	1	NA	NA	NA	0.126590935373312	NA	NA	NA	9.39376774859775e-12	NA	NA	NA	0.457	0.0316477
TRIM27	1	0	0	0	1	NA	NA	NA	0.126415570760606	NA	NA	NA	1.27091931667137e-12	NA	NA	NA	0.445	0.0316039
ZFAND3	1	0	0	1	0	NA	NA	0.1263275104397	NA	NA	NA	6.54660543825422e-06	NA	NA	NA	0.486	NA	0.0315819
FOXJ3	1	0	0	1	0	NA	NA	0.126170360402752	NA	NA	NA	6.00519034126989e-08	NA	NA	NA	0.567	NA	0.0315426
TMEM106C	1	0	0	1	0	NA	NA	0.125868985993707	NA	NA	NA	3.48873620168705e-07	NA	NA	NA	0.355	NA	0.0314672
KCNC2	1	0	0	0	1	NA	NA	NA	0.12536922654686	NA	NA	NA	2.47551682332141e-07	NA	NA	NA	0.639	0.0313423
EIF2A	1	0	1	0	0	NA	0.125295138155343	NA	NA	NA	9.88291853740308e-11	NA	NA	NA	0.318	NA	NA	0.0313238
HIF1AN	1	0	0	0	1	NA	NA	NA	0.125049813962671	NA	NA	NA	8.08823970318182e-12	NA	NA	NA	0.425	0.0312625
VCPIP1	1	0	1	0	0	NA	0.124945482805535	NA	NA	NA	2.52945708227231e-11	NA	NA	NA	0.288	NA	NA	0.0312364
MTA3	1	0	0	0	1	NA	NA	NA	0.12489637043385	NA	NA	NA	3.7315906560639e-11	NA	NA	NA	0.471	0.0312241
NFYB	1	0	1	0	0	NA	0.124860633806399	NA	NA	NA	5.97722800477297e-12	NA	NA	NA	0.331	NA	NA	0.0312152
ANKLE2	1	0	0	0	1	NA	NA	NA	0.124750861073173	NA	NA	NA	3.15002630534204e-13	NA	NA	NA	0.382	0.0311877
EIPR1	1	0	1	0	0	NA	0.124686717737856	NA	NA	NA	1.5379441538398e-10	NA	NA	NA	0.335	NA	NA	0.0311717
PANX2	1	0	0	1	0	NA	NA	0.124680554026165	NA	NA	NA	4.68020990384325e-07	NA	NA	NA	0.298	NA	0.0311701
THYN1	1	0	0	1	0	NA	NA	0.124501235537441	NA	NA	NA	1.83657395248254e-06	NA	NA	NA	0.49	NA	0.0311253
NRG3	1	0	0	0	1	NA	NA	NA	0.124449744562581	NA	NA	NA	4.06475761802782e-14	NA	NA	NA	0.344	0.0311124
GID8	1	0	0	1	0	NA	NA	0.124413114639838	NA	NA	NA	2.12402331220123e-06	NA	NA	NA	0.527	NA	0.0311033
AGAP3	1	0	1	0	0	NA	0.124232422053257	NA	NA	NA	3.31599508749078e-09	NA	NA	NA	0.928	NA	NA	0.0310581
PMPCA	1	0	0	1	0	NA	NA	0.124179687934763	NA	NA	NA	6.12650457120533e-06	NA	NA	NA	0.453	NA	0.0310449
RPS6KL1	1	0	0	1	0	NA	NA	0.124009000919112	NA	NA	NA	3.40699748246971e-08	NA	NA	NA	0.363	NA	0.0310023
TOMM40L	1	0	0	1	0	NA	NA	0.123866773973118	NA	NA	NA	1.47986284625805e-07	NA	NA	NA	0.306	NA	0.0309667
CALCOCO1	1	0	0	0	1	NA	NA	NA	0.123832496455814	NA	NA	NA	5.82416016947231e-13	NA	NA	NA	0.529	0.0309581
MRPS21	1	0	0	1	0	NA	NA	0.123822263389236	NA	NA	NA	0.000290054784329639	NA	NA	NA	0.845	NA	0.0309556
NDUFAF2	1	0	1	0	0	NA	0.12374900583771	NA	NA	NA	4.62665594111877e-11	NA	NA	NA	0.356	NA	NA	0.0309373
BAIAP2L2	1	0	0	0	1	NA	NA	NA	0.123747756711939	NA	NA	NA	4.26123936450167e-18	NA	NA	NA	0.221	0.0309369
OTUD4	1	0	0	0	1	NA	NA	NA	0.123574190079723	NA	NA	NA	2.76843306417934e-12	NA	NA	NA	0.397	0.0308935
TK2	1	0	0	1	0	NA	NA	0.123439769292052	NA	NA	NA	3.73336108638522e-06	NA	NA	NA	0.437	NA	0.0308599
TCF4	1	0	0	0	1	NA	NA	NA	0.123432766996622	NA	NA	NA	1.92583082912603e-08	NA	NA	NA	0.827	0.0308582
FBXL18	1	0	0	1	0	NA	NA	0.123159937396645	NA	NA	NA	3.16490360558404e-08	NA	NA	NA	0.408	NA	0.03079
RHOT1	1	0	0	1	0	NA	NA	0.123113287767053	NA	NA	NA	6.00608308521416e-07	NA	NA	NA	0.531	NA	0.0307783
ACD	1	0	0	0	1	NA	NA	NA	0.123071294754759	NA	NA	NA	4.51644428237617e-13	NA	NA	NA	0.358	0.0307678
LINC00205	1	0	0	0	1	NA	NA	NA	0.122970702440889	NA	NA	NA	3.22477061527931e-12	NA	NA	NA	0.445	0.0307427
QRICH1	1	0	0	1	0	NA	NA	0.122707303532403	NA	NA	NA	7.36660580250876e-07	NA	NA	NA	0.49	NA	0.0306768
RAD51C	1	0	1	0	0	NA	0.122567746782432	NA	NA	NA	3.69216311227678e-12	NA	NA	NA	0.301	NA	NA	0.0306419
NPRL2	1	0	1	0	0	NA	0.122497338583215	NA	NA	NA	9.43186616657228e-12	NA	NA	NA	0.314	NA	NA	0.0306243
MAP4K2	1	0	1	0	0	NA	0.122322820855798	NA	NA	NA	1.59624839385692e-10	NA	NA	NA	0.288	NA	NA	0.0305807
JAKMIP2	1	0	0	0	1	NA	NA	NA	0.121749336035955	NA	NA	NA	2.80017996668114e-13	NA	NA	NA	0.305	0.0304373
ALKBH4	1	0	0	1	0	NA	NA	0.121684611131494	NA	NA	NA	2.35074366098726e-10	NA	NA	NA	0.273	NA	0.0304212
LZIC	1	0	0	0	1	NA	NA	NA	0.1216775266536	NA	NA	NA	1.30457564256955e-11	NA	NA	NA	0.351	0.0304194
SAMD12	1	0	0	1	0	NA	NA	0.121658514076545	NA	NA	NA	1.57664259779027e-07	NA	NA	NA	0.494	NA	0.0304146
PTCH2	1	0	0	1	0	NA	NA	0.121646842196438	NA	NA	NA	1.33467485030716e-08	NA	NA	NA	0.253	NA	0.0304117
LETMD1	1	0	0	1	0	NA	NA	0.121642616204475	NA	NA	NA	8.94142366218796e-07	NA	NA	NA	0.51	NA	0.0304107
RNGTT	1	0	0	1	0	NA	NA	0.121497233767451	NA	NA	NA	6.09489001244649e-08	NA	NA	NA	0.269	NA	0.0303743
MRPL46	1	0	1	0	0	NA	0.121464919926635	NA	NA	NA	2.10765693218793e-09	NA	NA	NA	0.258	NA	NA	0.0303662
TMEM115	1	0	0	0	1	NA	NA	NA	0.121442438320309	NA	NA	NA	3.30045636110459e-11	NA	NA	NA	0.409	0.0303606
NCKAP1	1	0	0	1	0	NA	NA	0.121366791198593	NA	NA	NA	5.207944436906e-05	NA	NA	NA	0.935	NA	0.0303417
REXO1	1	0	0	1	0	NA	NA	0.121288450285011	NA	NA	NA	7.27261279188937e-07	NA	NA	NA	0.371	NA	0.0303221
MRTO4	1	0	0	0	1	NA	NA	NA	0.121235510719064	NA	NA	NA	3.23385820813514e-13	NA	NA	NA	0.312	0.0303089
HECW2	1	0	0	0	1	NA	NA	NA	0.121225121702332	NA	NA	NA	1.87246985403822e-14	NA	NA	NA	0.305	0.0303063
TMEM200C	1	0	0	1	0	NA	NA	0.121069408843179	NA	NA	NA	5.12985811964979e-11	NA	NA	NA	0.208	NA	0.0302674
KIFC2	1	0	0	1	0	NA	NA	0.121016143216364	NA	NA	NA	0.00106057183635024	NA	NA	NA	0.796	NA	0.030254
BEX4	1	0	0	1	0	NA	NA	0.12099723778926	NA	NA	NA	2.96914089643305e-05	NA	NA	NA	0.963	NA	0.0302493
SYT12	1	0	0	1	0	NA	NA	0.120928797289484	NA	NA	NA	4.7876634233222e-08	NA	NA	NA	0.327	NA	0.0302322
ATP6V0B	1	0	1	0	0	NA	0.120868140564633	NA	NA	NA	7.80894294241058e-08	NA	NA	NA	0.936	NA	NA	0.030217
PTDSS2	1	0	0	0	1	NA	NA	NA	0.120707306820083	NA	NA	NA	1.13651053501265e-12	NA	NA	NA	0.442	0.0301768
AL021395.1	1	0	0	0	1	NA	NA	NA	0.120550633311686	NA	NA	NA	2.45946555295783e-13	NA	NA	NA	0.231	0.0301377
TMEM120A	1	0	0	0	1	NA	NA	NA	0.120520075167174	NA	NA	NA	8.12866043232739e-10	NA	NA	NA	0.435	0.03013
GSTA4	1	0	0	1	0	NA	NA	0.120467180580474	NA	NA	NA	8.36499496109341e-06	NA	NA	NA	0.502	NA	0.0301168
MYO16	1	0	0	1	0	NA	NA	0.120341905309015	NA	NA	NA	1.03511839326821e-08	NA	NA	NA	0.224	NA	0.0300855
KAT7	1	0	0	0	1	NA	NA	NA	0.120313037777364	NA	NA	NA	1.00602969363865e-12	NA	NA	NA	0.435	0.0300783
PTPN9	1	0	0	1	0	NA	NA	0.12023313960693	NA	NA	NA	1.89487845074722e-06	NA	NA	NA	0.318	NA	0.0300583
DNAJC27	1	0	1	0	0	NA	0.120196338071319	NA	NA	NA	2.10762522535047e-14	NA	NA	NA	0.225	NA	NA	0.0300491
TFPT	1	0	0	0	1	NA	NA	NA	0.12019556758529	NA	NA	NA	6.57891412726887e-10	NA	NA	NA	0.514	0.0300489
CCDC107	1	0	0	0	1	NA	NA	NA	0.120090228147015	NA	NA	NA	3.98597961341807e-11	NA	NA	NA	0.445	0.0300226
BCL2L13	1	0	0	1	0	NA	NA	0.12007786551616	NA	NA	NA	1.39230434923194e-07	NA	NA	NA	0.314	NA	0.0300195
NIPSNAP3B	1	0	0	1	0	NA	NA	0.120025245292091	NA	NA	NA	4.27216750035722e-10	NA	NA	NA	0.233	NA	0.0300063
MCUR1	1	0	1	0	0	NA	0.120017339207674	NA	NA	NA	3.10119088022379e-10	NA	NA	NA	0.339	NA	NA	0.0300043
PRDM2	1	0	0	0	1	NA	NA	NA	0.11995034915917	NA	NA	NA	1.72666975807932e-10	NA	NA	NA	0.579	0.0299876
DCBLD2	1	0	0	0	1	NA	NA	NA	0.119827361044293	NA	NA	NA	5.48809485070464e-15	NA	NA	NA	0.214	0.0299568
UBE2Q1	1	0	0	1	0	NA	NA	0.119812241403964	NA	NA	NA	4.61030659238852e-05	NA	NA	NA	0.616	NA	0.0299531
UNC45A	1	0	1	0	0	NA	0.119800684013567	NA	NA	NA	1.36486719339368e-11	NA	NA	NA	0.314	NA	NA	0.0299502
SCN1A	1	1	0	0	0	0.119760347121894	NA	NA	NA	1.25300612295372e-09	NA	NA	NA	0.524	NA	NA	NA	0.0299401
FIG4	1	0	0	1	0	NA	NA	0.119704039065486	NA	NA	NA	8.45779653573042e-08	NA	NA	NA	0.339	NA	0.029926
SIAH2	1	0	1	0	0	NA	0.119596458029334	NA	NA	NA	2.71358631673642e-11	NA	NA	NA	0.271	NA	NA	0.0298991
LINC01007	1	0	0	0	1	NA	NA	NA	0.119360955045396	NA	NA	NA	7.4699009752284e-16	NA	NA	NA	0.236	0.0298402
ZNF84	1	0	0	0	1	NA	NA	NA	0.119351744251054	NA	NA	NA	6.68204120013482e-15	NA	NA	NA	0.377	0.0298379
GRAMD1B	1	0	0	0	1	NA	NA	NA	0.11915438850132	NA	NA	NA	1.19233635945322e-07	NA	NA	NA	0.642	0.0297886
NSUN5	1	0	0	1	0	NA	NA	0.11901417138797	NA	NA	NA	1.84273331188309e-05	NA	NA	NA	0.384	NA	0.0297535
CYB5R1	1	0	1	0	0	NA	0.118992385437968	NA	NA	NA	3.82344103502198e-12	NA	NA	NA	0.297	NA	NA	0.0297481
TRMT61A	1	0	0	1	0	NA	NA	0.118674529965954	NA	NA	NA	9.7690423246203e-08	NA	NA	NA	0.306	NA	0.0296686
OSTM1	1	0	0	1	0	NA	NA	0.11856992896184	NA	NA	NA	9.11445209501291e-07	NA	NA	NA	0.38	NA	0.0296425
MUL1	1	0	1	0	0	NA	0.118457091224675	NA	NA	NA	2.23054146343952e-10	NA	NA	NA	0.258	NA	NA	0.0296143
TERF2	1	0	0	1	0	NA	NA	0.118440989662653	NA	NA	NA	7.78093044836202e-08	NA	NA	NA	0.535	NA	0.0296102
BAG5	1	0	0	1	0	NA	NA	0.118250092627085	NA	NA	NA	3.34042578175652e-07	NA	NA	NA	0.412	NA	0.0295625
PREP	1	0	0	0	1	NA	NA	NA	0.118121163691262	NA	NA	NA	4.75666774438374e-09	NA	NA	NA	0.31	0.0295303
CCDC184	1	0	0	0	1	NA	NA	NA	0.118055874623893	NA	NA	NA	2.20612272950895e-14	NA	NA	NA	0.288	0.029514
PIK3R3	1	0	1	0	0	NA	0.118027586917677	NA	NA	NA	7.44157959267152e-09	NA	NA	NA	0.288	NA	NA	0.0295069
NOSIP	1	0	1	0	0	NA	0.118001224255506	NA	NA	NA	7.86661291361235e-11	NA	NA	NA	0.394	NA	NA	0.0295003
EIF1B	1	0	1	0	0	NA	0.11794654256767	NA	NA	NA	4.43100771330182e-07	NA	NA	NA	0.788	NA	NA	0.0294866
AGPAT2	1	0	0	1	0	NA	NA	0.117905512130847	NA	NA	NA	2.93556312592215e-09	NA	NA	NA	0.261	NA	0.0294764
MRPS18B	1	0	1	0	0	NA	0.117851365657517	NA	NA	NA	3.06353633050768e-10	NA	NA	NA	0.347	NA	NA	0.0294628
ZNF362	1	0	0	0	1	NA	NA	NA	0.117836401323532	NA	NA	NA	3.65305496653527e-12	NA	NA	NA	0.3	0.0294591
PIGZ	1	0	0	1	0	NA	NA	0.117806690379832	NA	NA	NA	9.87617464531725e-09	NA	NA	NA	0.282	NA	0.0294517
SRA1	1	0	1	0	0	NA	0.117795003020294	NA	NA	NA	4.237121184414e-11	NA	NA	NA	0.297	NA	NA	0.0294488
SETD5	1	0	0	1	0	NA	NA	0.117706717323707	NA	NA	NA	2.12672599054772e-06	NA	NA	NA	0.335	NA	0.0294267
ABRACL	1	0	1	0	0	NA	0.117699374698235	NA	NA	NA	3.88497813767955e-12	NA	NA	NA	0.246	NA	NA	0.0294248
MARCH7	1	0	0	0	1	NA	NA	NA	0.117644716350046	NA	NA	NA	6.58653432499841e-10	NA	NA	NA	0.382	0.0294112
PRKAB2	1	0	0	0	1	NA	NA	NA	0.117621301301193	NA	NA	NA	4.08004389302819e-10	NA	NA	NA	0.356	0.0294053
CDC34	1	0	0	1	0	NA	NA	0.117597923198254	NA	NA	NA	1.30512431552506e-06	NA	NA	NA	0.612	NA	0.0293995
TMEM150C	1	0	0	0	1	NA	NA	NA	0.117596673628971	NA	NA	NA	1.68288580030518e-11	NA	NA	NA	0.334	0.0293992
MAP2K2	1	0	0	1	0	NA	NA	0.117570497150574	NA	NA	NA	6.06192801174216e-05	NA	NA	NA	0.788	NA	0.0293926
EFNA5	1	0	1	0	0	NA	0.117348347538259	NA	NA	NA	3.68980851077183e-12	NA	NA	NA	0.267	NA	NA	0.0293371
REEP2	1	0	0	1	0	NA	NA	0.117347221760094	NA	NA	NA	5.7925934087766e-05	NA	NA	NA	0.78	NA	0.0293368
PCP4L1	1	0	1	0	0	NA	0.117325023651099	NA	NA	NA	1.08899402161417e-08	NA	NA	NA	0.263	NA	NA	0.0293313
RCBTB1	1	0	1	0	0	NA	0.117253086516551	NA	NA	NA	9.36957646693341e-12	NA	NA	NA	0.297	NA	NA	0.0293133
AC104083.1	1	0	0	1	0	NA	NA	0.117124252981278	NA	NA	NA	3.74189947886367e-07	NA	NA	NA	0.343	NA	0.0292811
RAF1	1	0	0	0	1	NA	NA	NA	0.117081271971377	NA	NA	NA	8.40489099286851e-12	NA	NA	NA	0.452	0.0292703
YTHDF2	1	0	0	0	1	NA	NA	NA	0.117032253099101	NA	NA	NA	6.28259765504205e-11	NA	NA	NA	0.495	0.0292581
USP7	1	0	0	1	0	NA	NA	0.11695469755683	NA	NA	NA	8.15655250312732e-06	NA	NA	NA	0.649	NA	0.0292387
POU3F2	1	0	1	0	0	NA	0.116845965136195	NA	NA	NA	2.63122264850904e-11	NA	NA	NA	0.267	NA	NA	0.0292115
MRTFA	1	0	0	0	1	NA	NA	NA	0.11679416343941	NA	NA	NA	1.1947952915501e-10	NA	NA	NA	0.498	0.0291985
ACADM	1	0	0	1	0	NA	NA	0.1167622159673	NA	NA	NA	4.41881056879881e-07	NA	NA	NA	0.433	NA	0.0291906
HPF1	1	0	1	0	0	NA	0.11673089652405	NA	NA	NA	3.16158028406604e-09	NA	NA	NA	0.288	NA	NA	0.0291827
C20orf194	1	0	0	0	1	NA	NA	NA	0.116546790322368	NA	NA	NA	4.27681391285283e-11	NA	NA	NA	0.471	0.0291367
MPP5	1	0	0	0	1	NA	NA	NA	0.116489988858238	NA	NA	NA	1.04131619341469e-12	NA	NA	NA	0.353	0.0291225
RNF170	1	0	0	0	1	NA	NA	NA	0.116472024963101	NA	NA	NA	3.21432062831993e-09	NA	NA	NA	0.317	0.029118
WWP2	1	0	0	0	1	NA	NA	NA	0.11643086373017	NA	NA	NA	8.75207166290841e-12	NA	NA	NA	0.337	0.0291077
LINGO1	1	0	0	0	1	NA	NA	NA	0.116383346411687	NA	NA	NA	1.58629234765107e-08	NA	NA	NA	0.877	0.0290958
PRPF31	1	0	0	1	0	NA	NA	0.116370537620598	NA	NA	NA	4.50513644302736e-06	NA	NA	NA	0.457	NA	0.0290926
WNK2	1	0	0	0	1	NA	NA	NA	0.116296767548891	NA	NA	NA	1.03607287095454e-08	NA	NA	NA	0.632	0.0290742
CNOT8	1	0	1	0	0	NA	0.116250361250942	NA	NA	NA	4.00203230524077e-09	NA	NA	NA	0.343	NA	NA	0.0290626
OBI1	1	0	0	1	0	NA	NA	0.116196621552054	NA	NA	NA	8.20230528765228e-08	NA	NA	NA	0.282	NA	0.0290492
PLCH2	1	0	1	0	0	NA	0.116125960238576	NA	NA	NA	5.22796285423946e-12	NA	NA	NA	0.237	NA	NA	0.0290315
AP5M1	1	0	0	0	1	NA	NA	NA	0.116120410052293	NA	NA	NA	2.36659541988361e-10	NA	NA	NA	0.389	0.0290301
TTC9B	1	0	0	1	0	NA	NA	0.116023715936243	NA	NA	NA	0.000138173407799142	NA	NA	NA	0.873	NA	0.0290059
SRP19	1	0	0	0	1	NA	NA	NA	0.11591399563297	NA	NA	NA	3.58975029128119e-10	NA	NA	NA	0.438	0.0289785
DDX41	1	0	0	1	0	NA	NA	0.115863580287542	NA	NA	NA	3.29681957174921e-06	NA	NA	NA	0.547	NA	0.0289659
CCNB1IP1	1	0	0	1	0	NA	NA	0.115858391203818	NA	NA	NA	2.63705489728469e-06	NA	NA	NA	0.282	NA	0.0289646
GSTM4	1	0	0	1	0	NA	NA	0.11569078295348	NA	NA	NA	3.79864495265019e-08	NA	NA	NA	0.371	NA	0.0289227
BPHL	1	0	0	1	0	NA	NA	0.115511888394722	NA	NA	NA	7.02474030288336e-07	NA	NA	NA	0.282	NA	0.028878
VBP1	1	0	0	1	0	NA	NA	0.115454720430808	NA	NA	NA	2.53263380559891e-05	NA	NA	NA	0.6	NA	0.0288637
NCAPH2	1	0	0	1	0	NA	NA	0.115396796104469	NA	NA	NA	1.07770160552878e-07	NA	NA	NA	0.363	NA	0.0288492
SCAMP5	1	0	0	1	0	NA	NA	0.115288429568727	NA	NA	NA	2.19915260409286e-05	NA	NA	NA	0.943	NA	0.0288221
IQCE	1	0	0	1	0	NA	NA	0.115200151417756	NA	NA	NA	1.78582305600636e-06	NA	NA	NA	0.371	NA	0.0288
DGKQ	1	0	1	0	0	NA	0.115199686444999	NA	NA	NA	6.27304935611111e-11	NA	NA	NA	0.254	NA	NA	0.0287999
ZBTB41	1	0	1	0	0	NA	0.115102693701714	NA	NA	NA	3.2543927955701e-11	NA	NA	NA	0.297	NA	NA	0.0287757
PHYH	1	0	1	0	0	NA	0.115052787433887	NA	NA	NA	6.36014469319854e-09	NA	NA	NA	0.258	NA	NA	0.0287632
SUPV3L1	1	0	1	0	0	NA	0.114918473676086	NA	NA	NA	5.4413364274766e-12	NA	NA	NA	0.242	NA	NA	0.0287296
MRPL42	1	0	0	1	0	NA	NA	0.114906051149434	NA	NA	NA	5.24378948117004e-07	NA	NA	NA	0.412	NA	0.0287265
LYRM4	1	0	0	1	0	NA	NA	0.114839534514707	NA	NA	NA	1.93371683009366e-07	NA	NA	NA	0.38	NA	0.0287099
OTUD5	1	0	0	1	0	NA	NA	0.114645461223104	NA	NA	NA	5.96765732599373e-06	NA	NA	NA	0.547	NA	0.0286614
DCP2	1	0	0	1	0	NA	NA	0.114632098536402	NA	NA	NA	6.54783092455897e-08	NA	NA	NA	0.478	NA	0.028658
RBMX	1	0	0	0	1	NA	NA	NA	0.114558388673032	NA	NA	NA	3.41564589209536e-10	NA	NA	NA	0.454	0.0286396
EAF1	1	0	0	1	0	NA	NA	0.114499629684786	NA	NA	NA	4.53088565390512e-06	NA	NA	NA	0.298	NA	0.0286249
PAMR1	1	0	0	0	1	NA	NA	NA	0.114477576962921	NA	NA	NA	6.26412760250004e-13	NA	NA	NA	0.288	0.0286194
DCK	1	0	0	1	0	NA	NA	0.114441713762894	NA	NA	NA	1.72156451794788e-06	NA	NA	NA	0.376	NA	0.0286104
MTPN	1	0	0	1	0	NA	NA	0.114229284758278	NA	NA	NA	0.000182187794414403	NA	NA	NA	0.935	NA	0.0285573
TTLL12	1	0	0	1	0	NA	NA	0.114204542877943	NA	NA	NA	1.62710733670938e-07	NA	NA	NA	0.335	NA	0.0285511
CLIP1	1	0	1	0	0	NA	0.11419251129429	NA	NA	NA	4.34612781508412e-08	NA	NA	NA	0.415	NA	NA	0.0285481
NIPSNAP1	1	0	0	0	1	NA	NA	NA	0.114102608826896	NA	NA	NA	1.10177173712985e-10	NA	NA	NA	0.418	0.0285257
POLR2G	1	0	0	0	1	NA	NA	NA	0.11407412647932	NA	NA	NA	1.81743495204848e-10	NA	NA	NA	0.522	0.0285185
SLC11A2	1	0	0	0	1	NA	NA	NA	0.114053632786254	NA	NA	NA	4.29897202352892e-10	NA	NA	NA	0.365	0.0285134
FBXL19	1	0	0	1	0	NA	NA	0.113627735751493	NA	NA	NA	7.83274085813986e-07	NA	NA	NA	0.396	NA	0.0284069
NOMO1	1	0	0	0	1	NA	NA	NA	0.113555795676344	NA	NA	NA	2.01845582982687e-10	NA	NA	NA	0.488	0.0283889
VLDLR	1	0	0	0	1	NA	NA	NA	0.113394967716274	NA	NA	NA	5.35015107708562e-14	NA	NA	NA	0.308	0.0283487
PDE4D	1	0	0	0	1	NA	NA	NA	0.113152325830241	NA	NA	NA	2.53666714196131e-13	NA	NA	NA	0.293	0.0282881
TMEM43	1	0	0	1	0	NA	NA	0.113097420314219	NA	NA	NA	5.11407751657799e-08	NA	NA	NA	0.392	NA	0.0282744
EHBP1	1	0	0	1	0	NA	NA	0.113035685356094	NA	NA	NA	1.17759789503389e-08	NA	NA	NA	0.461	NA	0.0282589
CNOT7	1	0	0	0	1	NA	NA	NA	0.112968485403213	NA	NA	NA	2.16488746924792e-09	NA	NA	NA	0.579	0.0282421
LASP1	1	0	0	1	0	NA	NA	0.112941064022252	NA	NA	NA	2.80889285357156e-06	NA	NA	NA	0.58	NA	0.0282353
AGO4	1	0	0	1	0	NA	NA	0.112863285132296	NA	NA	NA	7.47533668799658e-08	NA	NA	NA	0.286	NA	0.0282158
DNAJC4	1	0	1	0	0	NA	0.112823119763851	NA	NA	NA	4.17086264016238e-10	NA	NA	NA	0.322	NA	NA	0.0282058
ZZEF1	1	0	0	0	1	NA	NA	NA	0.112697768889158	NA	NA	NA	2.07051593754657e-12	NA	NA	NA	0.255	0.0281744
TMEM237	1	0	0	0	1	NA	NA	NA	0.112484036149538	NA	NA	NA	1.61974184887876e-13	NA	NA	NA	0.329	0.028121
AC118549.1	1	0	0	1	0	NA	NA	0.112455599472796	NA	NA	NA	5.1862191415491e-08	NA	NA	NA	0.343	NA	0.0281139
PHF3	1	0	0	0	1	NA	NA	NA	0.112396610698866	NA	NA	NA	6.50323286046426e-13	NA	NA	NA	0.332	0.0280992
CD83	1	0	0	1	0	NA	NA	0.112370401134886	NA	NA	NA	2.05885797638153e-07	NA	NA	NA	0.355	NA	0.0280926
PVR	1	0	0	1	0	NA	NA	0.112296331051086	NA	NA	NA	8.46720440316925e-10	NA	NA	NA	0.257	NA	0.0280741
USP4	1	0	0	1	0	NA	NA	0.112287179709104	NA	NA	NA	1.20589968549867e-05	NA	NA	NA	0.339	NA	0.0280718
IMPDH1	1	0	1	0	0	NA	0.11220694803784	NA	NA	NA	8.7449913643461e-11	NA	NA	NA	0.339	NA	NA	0.0280517
MAT2B	1	0	0	1	0	NA	NA	0.112144577132941	NA	NA	NA	0.000145404659475028	NA	NA	NA	0.58	NA	0.0280361
AC124016.2	1	0	0	1	0	NA	NA	0.112073207948832	NA	NA	NA	2.21256577646561e-06	NA	NA	NA	0.351	NA	0.0280183
LRFN1	1	0	0	0	1	NA	NA	NA	0.11206044127162	NA	NA	NA	2.10313207398848e-12	NA	NA	NA	0.327	0.0280151
SCAMP3	1	0	1	0	0	NA	0.112032929069333	NA	NA	NA	6.43253322914205e-10	NA	NA	NA	0.394	NA	NA	0.0280082
SYAP1	1	0	0	0	1	NA	NA	NA	0.111977927574299	NA	NA	NA	2.94588505645138e-12	NA	NA	NA	0.341	0.0279945
YIPF5	1	0	1	0	0	NA	0.111943160423023	NA	NA	NA	1.0441639964967e-09	NA	NA	NA	0.305	NA	NA	0.0279858
ZKSCAN1	1	0	1	0	0	NA	0.111848396581865	NA	NA	NA	1.16924670965879e-09	NA	NA	NA	0.356	NA	NA	0.0279621
ZFAND5	1	0	0	1	0	NA	NA	0.111743638344077	NA	NA	NA	0.000553931553564138	NA	NA	NA	0.91	NA	0.0279359
DDX19A	1	0	0	0	1	NA	NA	NA	0.111541485476237	NA	NA	NA	6.41115923999184e-13	NA	NA	NA	0.339	0.0278854
PTPRJ	1	0	0	0	1	NA	NA	NA	0.1115381204757	NA	NA	NA	2.2017247175422e-06	NA	NA	NA	0.349	0.0278845
TM7SF3	1	0	0	0	1	NA	NA	NA	0.111533720033235	NA	NA	NA	3.26968257687406e-11	NA	NA	NA	0.442	0.0278834
STIP1	1	0	0	1	0	NA	NA	0.111479555789869	NA	NA	NA	9.06837415412511e-05	NA	NA	NA	0.551	NA	0.0278699
CDC27	1	0	1	0	0	NA	0.111330025048244	NA	NA	NA	5.22925073768312e-08	NA	NA	NA	0.301	NA	NA	0.0278325
EIF4H	1	0	1	0	0	NA	0.111326057022595	NA	NA	NA	1.92184028404929e-08	NA	NA	NA	0.903	NA	NA	0.0278315
ZDHHC1	1	0	0	1	0	NA	NA	0.111303115410326	NA	NA	NA	1.07278606581156e-08	NA	NA	NA	0.208	NA	0.0278258
TTC4	1	0	1	0	0	NA	0.111254302389641	NA	NA	NA	1.32681580693091e-11	NA	NA	NA	0.254	NA	NA	0.0278136
PMM1	1	0	0	0	1	NA	NA	NA	0.111121715573587	NA	NA	NA	1.11554292867231e-11	NA	NA	NA	0.57	0.0277804
PDZD8	1	0	1	0	0	NA	0.110827858962494	NA	NA	NA	1.22674823852026e-10	NA	NA	NA	0.314	NA	NA	0.027707
ADAMTS10	1	0	0	0	1	NA	NA	NA	0.110733476989911	NA	NA	NA	5.80756707054128e-12	NA	NA	NA	0.305	0.0276834
ULK2	1	0	0	0	1	NA	NA	NA	0.110713607891146	NA	NA	NA	2.74190536116327e-11	NA	NA	NA	0.454	0.0276784
MLEC	1	0	0	1	0	NA	NA	0.110684065635637	NA	NA	NA	6.96676638793577e-06	NA	NA	NA	0.478	NA	0.027671
TOP2B	1	0	0	0	1	NA	NA	NA	0.110644764961769	NA	NA	NA	1.08696249838073e-09	NA	NA	NA	0.575	0.0276612
PNKP	1	0	0	1	0	NA	NA	0.11063203300843	NA	NA	NA	8.7003998122134e-08	NA	NA	NA	0.302	NA	0.027658
UPF3A	1	0	1	0	0	NA	0.11056859599562	NA	NA	NA	1.87177457343778e-09	NA	NA	NA	0.364	NA	NA	0.0276421
RPL7L1	1	0	0	0	1	NA	NA	NA	0.110320833463406	NA	NA	NA	6.51261786645645e-09	NA	NA	NA	0.601	0.0275802
PTRHD1	1	0	0	0	1	NA	NA	NA	0.110262343159454	NA	NA	NA	1.07312987494183e-11	NA	NA	NA	0.399	0.0275656
RIMS2	1	0	0	0	1	NA	NA	NA	0.110163434475605	NA	NA	NA	7.33205876615694e-11	NA	NA	NA	0.416	0.0275409
PER3	1	0	0	1	0	NA	NA	0.11005636373844	NA	NA	NA	2.13968545998156e-06	NA	NA	NA	0.367	NA	0.0275141
YOD1	1	0	1	0	0	NA	0.110029314575026	NA	NA	NA	1.39107142938276e-11	NA	NA	NA	0.199	NA	NA	0.0275073
CUL2	1	0	0	0	1	NA	NA	NA	0.110014576158274	NA	NA	NA	6.79209022374441e-09	NA	NA	NA	0.361	0.0275036
TATDN2	1	0	0	1	0	NA	NA	0.109965838670726	NA	NA	NA	9.17412793402115e-07	NA	NA	NA	0.339	NA	0.0274915
KIF5C	1	0	1	0	0	NA	0.109918523335037	NA	NA	NA	4.15797609069224e-09	NA	NA	NA	0.924	NA	NA	0.0274796
ARMH3	1	0	0	0	1	NA	NA	NA	0.109891684517823	NA	NA	NA	3.15330442280443e-12	NA	NA	NA	0.329	0.0274729
MIB1	1	0	0	0	1	NA	NA	NA	0.109790978127536	NA	NA	NA	3.07831633756483e-09	NA	NA	NA	0.351	0.0274477
GAS6	1	0	0	1	0	NA	NA	0.109730604400064	NA	NA	NA	1.52056469155551e-05	NA	NA	NA	0.584	NA	0.0274327
MAP3K9	1	0	0	0	1	NA	NA	NA	0.109660812999017	NA	NA	NA	1.73615545410121e-09	NA	NA	NA	0.349	0.0274152
ZNF639	1	0	0	0	1	NA	NA	NA	0.109641966676641	NA	NA	NA	3.21863287964607e-12	NA	NA	NA	0.26	0.0274105
EID2	1	0	0	0	1	NA	NA	NA	0.109572630210395	NA	NA	NA	1.10334286876057e-11	NA	NA	NA	0.423	0.0273932
SMIM17	1	0	0	0	1	NA	NA	NA	0.109534563860742	NA	NA	NA	1.63482212997583e-13	NA	NA	NA	0.233	0.0273836
NMD3	1	0	0	1	0	NA	NA	0.109487773791341	NA	NA	NA	1.38330035354717e-08	NA	NA	NA	0.306	NA	0.0273719
MTMR6	1	0	0	1	0	NA	NA	0.109439024930836	NA	NA	NA	9.68628221870687e-06	NA	NA	NA	0.543	NA	0.0273598
TXN2	1	0	0	0	1	NA	NA	NA	0.109425040400595	NA	NA	NA	3.46786128343802e-08	NA	NA	NA	0.546	0.0273563
PLEKHA6	1	0	0	1	0	NA	NA	0.109221387322198	NA	NA	NA	1.33490189911957e-05	NA	NA	NA	0.522	NA	0.0273053
IER3IP1	1	0	0	1	0	NA	NA	0.109206494513191	NA	NA	NA	9.80909259612696e-06	NA	NA	NA	0.384	NA	0.0273016
EXOC3	1	0	1	0	0	NA	0.109095655741101	NA	NA	NA	4.95386089385892e-10	NA	NA	NA	0.403	NA	NA	0.0272739
UQCRC2	1	0	1	0	0	NA	0.109092599352255	NA	NA	NA	8.44357965675549e-07	NA	NA	NA	0.809	NA	NA	0.0272731
DYRK1B	1	0	0	1	0	NA	NA	0.109088913119815	NA	NA	NA	6.64311254928204e-07	NA	NA	NA	0.371	NA	0.0272722
VPS37D	1	0	0	1	0	NA	NA	0.109075716351044	NA	NA	NA	7.11588932545982e-08	NA	NA	NA	0.237	NA	0.0272689
ANO10	1	0	0	1	0	NA	NA	0.109045510050896	NA	NA	NA	2.2302296199806e-07	NA	NA	NA	0.286	NA	0.0272614
PEX11B	1	0	0	0	1	NA	NA	NA	0.109032286872045	NA	NA	NA	1.66862687118766e-10	NA	NA	NA	0.428	0.0272581
RUVBL2	1	0	0	1	0	NA	NA	0.109012405502856	NA	NA	NA	3.06971900990765e-05	NA	NA	NA	0.453	NA	0.0272531
LGALSL	1	0	0	1	0	NA	NA	0.108982811464014	NA	NA	NA	1.49533821633423e-05	NA	NA	NA	0.343	NA	0.0272457
ABHD8	1	0	0	0	1	NA	NA	NA	0.108964727283588	NA	NA	NA	1.25721012369124e-06	NA	NA	NA	0.719	0.0272412
PTPN12	1	0	0	0	1	NA	NA	NA	0.108771264449104	NA	NA	NA	6.53404085811112e-11	NA	NA	NA	0.291	0.0271928
TNIP1	1	0	1	0	0	NA	0.10876911523287	NA	NA	NA	1.35625537596859e-07	NA	NA	NA	0.28	NA	NA	0.0271923
SPCS3	1	0	0	1	0	NA	NA	0.108759128588834	NA	NA	NA	8.80896515247332e-06	NA	NA	NA	0.478	NA	0.0271898
AUH	1	0	0	1	0	NA	NA	0.10875385013732	NA	NA	NA	1.33070789904552e-06	NA	NA	NA	0.331	NA	0.0271885
KLHL18	1	0	1	0	0	NA	0.108678768524133	NA	NA	NA	1.97597251661644e-11	NA	NA	NA	0.258	NA	NA	0.0271697
NF1	1	0	0	0	1	NA	NA	NA	0.108664104493795	NA	NA	NA	1.63489885219682e-09	NA	NA	NA	0.572	0.027166
NRDC	1	0	0	1	0	NA	NA	0.108621897903837	NA	NA	NA	4.53621724571354e-05	NA	NA	NA	0.604	NA	0.0271555
FAM214B	1	0	0	1	0	NA	NA	0.108601718509016	NA	NA	NA	2.89764140821752e-06	NA	NA	NA	0.327	NA	0.0271504
HSPB11	1	0	1	0	0	NA	0.108594248062447	NA	NA	NA	7.59233602916409e-09	NA	NA	NA	0.284	NA	NA	0.0271486
UBR2	1	0	1	0	0	NA	0.108586862156233	NA	NA	NA	3.14966296328591e-11	NA	NA	NA	0.309	NA	NA	0.0271467
SECISBP2	1	0	0	0	1	NA	NA	NA	0.108576995385841	NA	NA	NA	3.35781519969609e-13	NA	NA	NA	0.308	0.0271442
U2AF2	1	0	0	0	1	NA	NA	NA	0.108366100994592	NA	NA	NA	3.71685694033937e-10	NA	NA	NA	0.495	0.0270915
KLF7	1	0	0	1	0	NA	NA	0.108319851924	NA	NA	NA	1.5397788034635e-05	NA	NA	NA	0.302	NA	0.02708
UQCC2	1	0	1	0	0	NA	0.108253698544675	NA	NA	NA	1.69135025651751e-07	NA	NA	NA	0.441	NA	NA	0.0270634
CEP68	1	0	1	0	0	NA	0.108225139808873	NA	NA	NA	1.3924090500812e-08	NA	NA	NA	0.275	NA	NA	0.0270563
STAT5B	1	0	0	0	1	NA	NA	NA	0.108198673897121	NA	NA	NA	7.81765610073683e-11	NA	NA	NA	0.409	0.0270497
ZBTB7A	1	0	0	1	0	NA	NA	0.108123160110013	NA	NA	NA	2.63751947660665e-05	NA	NA	NA	0.69	NA	0.0270308
PLA2G15	1	0	0	0	1	NA	NA	NA	0.108066691880356	NA	NA	NA	3.37338383758782e-11	NA	NA	NA	0.385	0.0270167
XPNPEP1	1	0	0	1	0	NA	NA	0.107937056304613	NA	NA	NA	1.80516055385989e-06	NA	NA	NA	0.31	NA	0.0269843
FUNDC1	1	0	0	0	1	NA	NA	NA	0.107853384736443	NA	NA	NA	2.48153938470288e-08	NA	NA	NA	0.332	0.0269633
DYNC2LI1	1	0	0	1	0	NA	NA	0.10784624519405	NA	NA	NA	2.8444611113874e-06	NA	NA	NA	0.318	NA	0.0269616
CSRNP3	1	0	0	0	1	NA	NA	NA	0.107787896925621	NA	NA	NA	6.77589637584147e-07	NA	NA	NA	0.63	0.026947
EIF4E2	1	0	0	1	0	NA	NA	0.107725683375831	NA	NA	NA	1.06094784899076e-06	NA	NA	NA	0.38	NA	0.0269314
RPA3	1	0	1	0	0	NA	0.107676151517993	NA	NA	NA	5.81387176344916e-10	NA	NA	NA	0.267	NA	NA	0.026919
TNRC6A	1	0	0	0	1	NA	NA	NA	0.107645863575951	NA	NA	NA	3.07322210623136e-09	NA	NA	NA	0.452	0.0269115
MTERF4	1	0	1	0	0	NA	0.107645018752312	NA	NA	NA	2.12769593843984e-09	NA	NA	NA	0.288	NA	NA	0.0269113
STT3A	1	0	0	0	1	NA	NA	NA	0.107453203908657	NA	NA	NA	2.63531093568792e-11	NA	NA	NA	0.303	0.0268633
RAB1A	1	0	1	0	0	NA	0.107435141949224	NA	NA	NA	5.44598989152515e-07	NA	NA	NA	0.818	NA	NA	0.0268588
MIB2	1	0	0	0	1	NA	NA	NA	0.107430679971045	NA	NA	NA	1.88692150804233e-09	NA	NA	NA	0.452	0.0268577
ARMT1	1	0	1	0	0	NA	0.107298011684757	NA	NA	NA	2.42134658376446e-10	NA	NA	NA	0.25	NA	NA	0.0268245
HR	1	0	0	1	0	NA	NA	0.107258287466013	NA	NA	NA	2.85290678732101e-09	NA	NA	NA	0.261	NA	0.0268146
RFX5	1	0	0	1	0	NA	NA	0.107258287466013	NA	NA	NA	4.0692798117696e-08	NA	NA	NA	0.249	NA	0.0268146
DPYSL4	1	0	0	0	1	NA	NA	NA	0.107237093334371	NA	NA	NA	1.50894175447266e-10	NA	NA	NA	0.474	0.0268093
CYB561D1	1	0	0	1	0	NA	NA	0.107179398226464	NA	NA	NA	2.28932255702337e-09	NA	NA	NA	0.216	NA	0.0267948
CHCHD6	1	0	0	0	1	NA	NA	NA	0.106961435411383	NA	NA	NA	3.16026102732622e-11	NA	NA	NA	0.421	0.0267404
TOP3A	1	0	0	1	0	NA	NA	0.106953163724738	NA	NA	NA	2.68749669454964e-08	NA	NA	NA	0.22	NA	0.0267383
PSMG2	1	0	1	0	0	NA	0.106834142582191	NA	NA	NA	1.38961031789283e-09	NA	NA	NA	0.39	NA	NA	0.0267085
ZMPSTE24	1	0	0	1	0	NA	NA	0.106812445176328	NA	NA	NA	7.63384804011885e-07	NA	NA	NA	0.4	NA	0.0267031
HAX1	1	0	1	0	0	NA	0.106797542174459	NA	NA	NA	1.10643055049362e-08	NA	NA	NA	0.449	NA	NA	0.0266994
TSTA3	1	0	0	1	0	NA	NA	0.106742572768576	NA	NA	NA	4.85425618633019e-07	NA	NA	NA	0.314	NA	0.0266856
GPR180	1	0	0	0	1	NA	NA	NA	0.106737935652577	NA	NA	NA	1.4505066284658e-11	NA	NA	NA	0.281	0.0266845
RAB15	1	0	0	0	1	NA	NA	NA	0.106734677639086	NA	NA	NA	1.59326806833717e-06	NA	NA	NA	0.601	0.0266837
DNTTIP2	1	0	1	0	0	NA	0.106703422429305	NA	NA	NA	1.25226903611006e-09	NA	NA	NA	0.246	NA	NA	0.0266759
FAM189B	1	0	1	0	0	NA	0.10669176734973	NA	NA	NA	1.6109742338945e-08	NA	NA	NA	0.271	NA	NA	0.0266729
PIAS3	1	0	0	1	0	NA	NA	0.106662048523487	NA	NA	NA	5.39408795257604e-06	NA	NA	NA	0.306	NA	0.0266655
MOK	1	0	0	0	1	NA	NA	NA	0.106649748342674	NA	NA	NA	3.02641300887619e-11	NA	NA	NA	0.288	0.0266624
CMBL	1	0	0	1	0	NA	NA	0.106548671591449	NA	NA	NA	5.47380812569658e-06	NA	NA	NA	0.396	NA	0.0266372
KCTD8	1	0	1	0	0	NA	0.106511495138203	NA	NA	NA	3.67260595998261e-10	NA	NA	NA	0.208	NA	NA	0.0266279
HGS	1	0	0	1	0	NA	NA	0.106482012610574	NA	NA	NA	4.66247550252068e-05	NA	NA	NA	0.584	NA	0.0266205
NOC2L	1	0	0	1	0	NA	NA	0.106438842238695	NA	NA	NA	1.17606402029446e-05	NA	NA	NA	0.482	NA	0.0266097
DCTPP1	1	0	0	1	0	NA	NA	0.106400873416242	NA	NA	NA	9.34077911028722e-05	NA	NA	NA	0.339	NA	0.0266002
PPM1A	1	0	0	1	0	NA	NA	0.106348851624655	NA	NA	NA	4.71838226136739e-05	NA	NA	NA	0.678	NA	0.0265872
ZBTB11	1	0	0	0	1	NA	NA	NA	0.106331136286224	NA	NA	NA	6.53287574421798e-10	NA	NA	NA	0.409	0.0265828
GNPAT	1	0	1	0	0	NA	0.106307225910652	NA	NA	NA	2.25555489972774e-08	NA	NA	NA	0.441	NA	NA	0.0265768
SNX19	1	0	1	0	0	NA	0.106307225910652	NA	NA	NA	1.34589813456671e-08	NA	NA	NA	0.275	NA	NA	0.0265768
THAP10	1	0	1	0	0	NA	0.106307225910652	NA	NA	NA	3.1359529642553e-14	NA	NA	NA	0.182	NA	NA	0.0265768
GLOD4	1	0	0	0	1	NA	NA	NA	0.106283452165229	NA	NA	NA	1.14705037389356e-08	NA	NA	NA	0.442	0.0265709
ARF4	1	0	1	0	0	NA	0.106145635864247	NA	NA	NA	5.93675227091622e-09	NA	NA	NA	0.475	NA	NA	0.0265364
CHST10	1	0	1	0	0	NA	0.106116258660955	NA	NA	NA	1.45867688280615e-07	NA	NA	NA	0.275	NA	NA	0.0265291
POPDC3	1	0	1	0	0	NA	0.106099390515536	NA	NA	NA	6.61823460624613e-13	NA	NA	NA	0.195	NA	NA	0.0265248
UTP18	1	0	0	0	1	NA	NA	NA	0.106075088225249	NA	NA	NA	3.05265329769912e-11	NA	NA	NA	0.325	0.0265188
SLC7A1	1	0	0	1	0	NA	NA	0.106003549339382	NA	NA	NA	5.22266857275229e-06	NA	NA	NA	0.457	NA	0.0265009
BORCS7	1	0	0	0	1	NA	NA	NA	0.105985052416576	NA	NA	NA	7.47751779920904e-08	NA	NA	NA	0.413	0.0264963
GTF2A2	1	0	1	0	0	NA	0.105949699986214	NA	NA	NA	4.1656632894379e-07	NA	NA	NA	0.339	NA	NA	0.0264874
NFS1	1	0	0	0	1	NA	NA	NA	0.105931749966346	NA	NA	NA	9.40862346418068e-11	NA	NA	NA	0.37	0.0264829
RSRC2	1	0	0	0	1	NA	NA	NA	0.105830096456282	NA	NA	NA	3.37503158788739e-09	NA	NA	NA	0.483	0.0264575
TMEM108	1	0	0	0	1	NA	NA	NA	0.105817643139136	NA	NA	NA	4.95336803687889e-12	NA	NA	NA	0.236	0.0264544
CNIH1	1	0	0	1	0	NA	NA	0.105803982952447	NA	NA	NA	3.47538915961679e-07	NA	NA	NA	0.539	NA	0.026451
SNHG16	1	0	0	1	0	NA	NA	0.105798018055863	NA	NA	NA	3.77025537922568e-07	NA	NA	NA	0.318	NA	0.0264495
TCOF1	1	0	0	0	1	NA	NA	NA	0.10576518393294	NA	NA	NA	5.30460632344135e-10	NA	NA	NA	0.308	0.0264413
LARP4	1	0	0	1	0	NA	NA	0.105759983238787	NA	NA	NA	4.97403246502627e-07	NA	NA	NA	0.253	NA	0.02644
SF3A3	1	0	1	0	0	NA	0.105736286700167	NA	NA	NA	4.68724342250203e-09	NA	NA	NA	0.292	NA	NA	0.0264341
PGS1	1	0	0	1	0	NA	NA	0.105591792166672	NA	NA	NA	2.72903803715362e-07	NA	NA	NA	0.339	NA	0.0263979
SPEN	1	0	0	0	1	NA	NA	NA	0.105573201134009	NA	NA	NA	3.18844294647948e-09	NA	NA	NA	0.44	0.0263933
WDFY1	1	0	0	1	0	NA	NA	0.105523129155062	NA	NA	NA	1.29283284753032e-05	NA	NA	NA	0.314	NA	0.0263808
NELFB	1	0	0	0	1	NA	NA	NA	0.105499480137965	NA	NA	NA	2.91052328078011e-10	NA	NA	NA	0.507	0.0263749
PORCN	1	0	0	1	0	NA	NA	0.105471623085382	NA	NA	NA	4.96344656656181e-07	NA	NA	NA	0.29	NA	0.0263679
MSL3	1	0	1	0	0	NA	0.105352754138276	NA	NA	NA	1.25743742290943e-08	NA	NA	NA	0.28	NA	NA	0.0263382
SRP14	1	0	1	0	0	NA	0.105253267742289	NA	NA	NA	3.32601262896455e-10	NA	NA	NA	0.996	NA	NA	0.0263133
IFT80	1	0	0	0	1	NA	NA	NA	0.105251260432822	NA	NA	NA	2.87146781045402e-10	NA	NA	NA	0.32	0.0263128
FDX1	1	0	0	1	0	NA	NA	0.105197237022473	NA	NA	NA	3.83230724254237e-07	NA	NA	NA	0.302	NA	0.0262993
ATP1B3	1	0	0	1	0	NA	NA	0.105146618207448	NA	NA	NA	1.41272715012863e-05	NA	NA	NA	0.571	NA	0.0262867
FURIN	1	0	0	1	0	NA	NA	0.105136020653197	NA	NA	NA	5.35947481195543e-06	NA	NA	NA	0.404	NA	0.026284
ANKS3	1	0	0	1	0	NA	NA	0.10505570422201	NA	NA	NA	4.11718148920714e-07	NA	NA	NA	0.249	NA	0.0262639
MRNIP	1	0	1	0	0	NA	0.104944695286233	NA	NA	NA	3.59106358209498e-09	NA	NA	NA	0.263	NA	NA	0.0262362
TTC19	1	0	0	1	0	NA	NA	0.104926930222611	NA	NA	NA	8.40843323692587e-06	NA	NA	NA	0.527	NA	0.0262317
HSD17B7	1	0	0	0	1	NA	NA	NA	0.104920995425747	NA	NA	NA	1.35254701838389e-11	NA	NA	NA	0.255	0.0262302
GRIK1	1	0	0	1	0	NA	NA	0.104904882101519	NA	NA	NA	2.34950865975866e-06	NA	NA	NA	0.2	NA	0.0262262
ST6GAL2	1	0	0	0	1	NA	NA	NA	0.104782398505823	NA	NA	NA	4.59649212345979e-11	NA	NA	NA	0.26	0.0261956
PTPN4	1	1	0	0	0	0.104780942039417	NA	NA	NA	8.15664953426168e-08	NA	NA	NA	0.385	NA	NA	NA	0.0261952
WDR75	1	0	0	1	0	NA	NA	0.104772698701514	NA	NA	NA	6.37436487720459e-09	NA	NA	NA	0.269	NA	0.0261932
SOX15	1	0	0	0	1	NA	NA	NA	0.104741847321645	NA	NA	NA	1.7464192305986e-09	NA	NA	NA	0.332	0.0261855
PCSK7	1	0	1	0	0	NA	0.104713282556643	NA	NA	NA	2.49286066089295e-09	NA	NA	NA	0.237	NA	NA	0.0261783
ST5	1	0	0	0	1	NA	NA	NA	0.104675539772794	NA	NA	NA	2.30480647051655e-11	NA	NA	NA	0.353	0.0261689
ACTL6B	1	0	0	0	1	NA	NA	NA	0.104675257659921	NA	NA	NA	2.39820384004179e-08	NA	NA	NA	0.457	0.0261688
TXNDC15	1	0	1	0	0	NA	0.10464900351318	NA	NA	NA	1.26027266055856e-07	NA	NA	NA	0.314	NA	NA	0.0261623
KLF10	1	0	0	1	0	NA	NA	0.104537388763625	NA	NA	NA	1.91808464823574e-07	NA	NA	NA	0.204	NA	0.0261343
DCUN1D2	1	0	1	0	0	NA	0.104520270208297	NA	NA	NA	1.52739222369152e-10	NA	NA	NA	0.25	NA	NA	0.0261301
APPL1	1	0	1	0	0	NA	0.10447067810335	NA	NA	NA	1.31566213955649e-08	NA	NA	NA	0.326	NA	NA	0.0261177
DOP1B	1	0	1	0	0	NA	0.10444483530509	NA	NA	NA	8.6934408257722e-12	NA	NA	NA	0.199	NA	NA	0.0261112
CCDC92	1	0	0	1	0	NA	NA	0.10443871718332	NA	NA	NA	5.12169643263574e-05	NA	NA	NA	0.918	NA	0.0261097
RPRD2	1	0	1	0	0	NA	0.104435617653287	NA	NA	NA	4.22187984129311e-08	NA	NA	NA	0.301	NA	NA	0.0261089
FAM120B	1	0	0	1	0	NA	NA	0.104338183156058	NA	NA	NA	9.80443494826095e-07	NA	NA	NA	0.416	NA	0.0260845
CASTOR3	1	0	1	0	0	NA	0.1043182549991	NA	NA	NA	1.50620075154175e-07	NA	NA	NA	0.326	NA	NA	0.0260796
NRAS	1	0	0	0	1	NA	NA	NA	0.10431053524878	NA	NA	NA	1.38753311486575e-09	NA	NA	NA	0.305	0.0260776
ATG16L2	1	0	0	0	1	NA	NA	NA	0.10418365584748	NA	NA	NA	1.90019727233218e-12	NA	NA	NA	0.209	0.0260459
WTAP	1	0	0	0	1	NA	NA	NA	0.10412871230196	NA	NA	NA	5.99478233468271e-08	NA	NA	NA	0.44	0.0260322
ATXN2L	1	0	1	0	0	NA	0.104117444013728	NA	NA	NA	6.71939143985784e-09	NA	NA	NA	0.339	NA	NA	0.0260294
OSBP2	1	0	0	0	1	NA	NA	NA	0.104117397772253	NA	NA	NA	2.27165538473132e-12	NA	NA	NA	0.269	0.0260293
TRAF3	1	0	0	1	0	NA	NA	0.104100445028784	NA	NA	NA	1.31390995078113e-06	NA	NA	NA	0.282	NA	0.0260251
USP12	1	0	0	0	1	NA	NA	NA	0.104059223569587	NA	NA	NA	5.76168070579493e-10	NA	NA	NA	0.329	0.0260148
DPP9	1	0	0	0	1	NA	NA	NA	0.104057909226755	NA	NA	NA	2.06337574601269e-10	NA	NA	NA	0.317	0.0260145
ERC1	1	0	0	0	1	NA	NA	NA	0.104005988617734	NA	NA	NA	2.1398922814976e-10	NA	NA	NA	0.382	0.0260015
ACVR2A	1	0	0	0	1	NA	NA	NA	0.103984154599936	NA	NA	NA	5.61633512791217e-11	NA	NA	NA	0.262	0.025996
SBK1	1	0	0	0	1	NA	NA	NA	0.103980754355458	NA	NA	NA	6.33574251219666e-13	NA	NA	NA	0.252	0.0259952
PTPN23	1	0	1	0	0	NA	0.103859244272012	NA	NA	NA	1.10834000273362e-07	NA	NA	NA	0.369	NA	NA	0.0259648
TBC1D7	1	0	1	0	0	NA	0.103859244272012	NA	NA	NA	1.93332244055894e-09	NA	NA	NA	0.208	NA	NA	0.0259648
CES4A	1	0	0	1	0	NA	NA	0.103832557200234	NA	NA	NA	6.30628648714743e-05	NA	NA	NA	0.367	NA	0.0259581
ZFYVE9	1	0	1	0	0	NA	0.103709562345825	NA	NA	NA	2.03110488569319e-10	NA	NA	NA	0.242	NA	NA	0.0259274
TTC9	1	0	1	0	0	NA	0.103704510182236	NA	NA	NA	1.37792739615087e-08	NA	NA	NA	0.314	NA	NA	0.0259261
CPTP	1	0	0	1	0	NA	NA	0.10370023075488	NA	NA	NA	2.89055713201047e-06	NA	NA	NA	0.384	NA	0.0259251
SNAPC2	1	0	0	1	0	NA	NA	0.103641476861425	NA	NA	NA	1.56907035962935e-07	NA	NA	NA	0.257	NA	0.0259104
FIP1L1	1	0	0	1	0	NA	NA	0.103592100241244	NA	NA	NA	2.66257502744781e-06	NA	NA	NA	0.31	NA	0.025898
DNAJC13	1	0	0	0	1	NA	NA	NA	0.1035356936658	NA	NA	NA	2.17098398257028e-09	NA	NA	NA	0.281	0.0258839
HHIPL1	1	0	0	1	0	NA	NA	0.103510895982036	NA	NA	NA	2.1422924900221e-07	NA	NA	NA	0.265	NA	0.0258777
PLXND1	1	0	0	0	1	NA	NA	NA	0.103510028338006	NA	NA	NA	1.58867124726864e-09	NA	NA	NA	0.428	0.0258775
COLGALT2	1	0	1	0	0	NA	0.103474095297131	NA	NA	NA	6.83595409267859e-10	NA	NA	NA	0.305	NA	NA	0.0258685
KCTD13	1	0	0	0	1	NA	NA	NA	0.10345276440854	NA	NA	NA	1.35093950886501e-09	NA	NA	NA	0.43	0.0258632
CSNK2A1	1	0	0	0	1	NA	NA	NA	0.103414247484526	NA	NA	NA	3.12774601330357e-09	NA	NA	NA	0.524	0.0258536
KANSL3	1	0	1	0	0	NA	0.103389787295596	NA	NA	NA	3.19713978330041e-09	NA	NA	NA	0.263	NA	NA	0.0258474
SYMPK	1	0	0	0	1	NA	NA	NA	0.103368327632726	NA	NA	NA	1.63798252515481e-08	NA	NA	NA	0.397	0.0258421
ATP8A1	1	0	0	1	0	NA	NA	0.103326329086661	NA	NA	NA	0.000909799487196096	NA	NA	NA	0.857	NA	0.0258316
SLC35A4	1	0	0	0	1	NA	NA	NA	0.103244247605545	NA	NA	NA	8.15751507454271e-10	NA	NA	NA	0.322	0.0258111
THNSL2	1	0	0	0	1	NA	NA	NA	0.103244247605545	NA	NA	NA	8.50508815261378e-10	NA	NA	NA	0.32	0.0258111
FXR2	1	0	0	0	1	NA	NA	NA	0.10315959021779	NA	NA	NA	4.15281686981672e-08	NA	NA	NA	0.567	0.0257899
SERTM1	1	0	0	0	1	NA	NA	NA	0.103137405328925	NA	NA	NA	1.89061225927965e-10	NA	NA	NA	0.346	0.0257844
CLIP4	1	0	1	0	0	NA	0.103132620069879	NA	NA	NA	6.03909127565453e-07	NA	NA	NA	0.356	NA	NA	0.0257832
FBXO42	1	0	0	1	0	NA	NA	0.103130638506892	NA	NA	NA	0.000158196860802095	NA	NA	NA	0.29	NA	0.0257827
PWP1	1	0	0	1	0	NA	NA	0.103083071330137	NA	NA	NA	0.000511776746614173	NA	NA	NA	0.286	NA	0.0257708
PSMD5	1	0	1	0	0	NA	0.103067044866026	NA	NA	NA	1.0774552480388e-10	NA	NA	NA	0.216	NA	NA	0.0257668
TAPT1	1	0	0	1	0	NA	NA	0.103007044653185	NA	NA	NA	3.53320142093876e-05	NA	NA	NA	0.42	NA	0.0257518
SF3B4	1	0	0	0	1	NA	NA	NA	0.102959547199957	NA	NA	NA	6.49634493870747e-11	NA	NA	NA	0.293	0.0257399
ST3GAL3	1	0	0	0	1	NA	NA	NA	0.102904808960407	NA	NA	NA	1.36213176404395e-09	NA	NA	NA	0.399	0.0257262
MIGA2	1	0	0	0	1	NA	NA	NA	0.102868731266171	NA	NA	NA	6.14474639621886e-10	NA	NA	NA	0.325	0.0257172
EP300	1	0	0	0	1	NA	NA	NA	0.102832221278505	NA	NA	NA	7.61632753771028e-09	NA	NA	NA	0.334	0.0257081
ABL2	1	0	1	0	0	NA	0.102795712353085	NA	NA	NA	6.87637397291715e-09	NA	NA	NA	0.258	NA	NA	0.0256989
AC105446.1	1	0	0	0	1	NA	NA	NA	0.102702273851437	NA	NA	NA	9.23651327428093e-12	NA	NA	NA	0.255	0.0256756
PARL	1	0	0	0	1	NA	NA	NA	0.102658001344394	NA	NA	NA	1.69530562245098e-08	NA	NA	NA	0.243	0.0256645
DPH3	1	0	1	0	0	NA	0.102525750611426	NA	NA	NA	1.19627456826565e-09	NA	NA	NA	0.246	NA	NA	0.0256314
RABIF	1	0	0	0	1	NA	NA	NA	0.102523904429116	NA	NA	NA	7.61635547118058e-09	NA	NA	NA	0.293	0.025631
SLC9A3-AS1	1	0	0	0	1	NA	NA	NA	0.102514206377939	NA	NA	NA	8.21829162665108e-12	NA	NA	NA	0.209	0.0256286
IFFO1	1	0	1	0	0	NA	0.102513526120882	NA	NA	NA	1.51062163337207e-08	NA	NA	NA	0.347	NA	NA	0.0256284
ARV1	1	0	0	0	1	NA	NA	NA	0.102475389322164	NA	NA	NA	8.97741164691364e-09	NA	NA	NA	0.303	0.0256188
GLT8D1	1	0	1	0	0	NA	0.102469922660174	NA	NA	NA	1.93509238905234e-09	NA	NA	NA	0.288	NA	NA	0.0256175
AKT2	1	0	0	0	1	NA	NA	NA	0.102443011369697	NA	NA	NA	4.83354551013766e-09	NA	NA	NA	0.394	0.0256108
EFNA1	1	0	0	0	1	NA	NA	NA	0.102428756303802	NA	NA	NA	5.39577987479222e-12	NA	NA	NA	0.291	0.0256072
PPP1R14C	1	0	1	0	0	NA	0.102406984899573	NA	NA	NA	1.38463116595556e-10	NA	NA	NA	0.212	NA	NA	0.0256017
DNMT3A	1	0	0	1	0	NA	NA	0.102331810079377	NA	NA	NA	1.50989964928497e-06	NA	NA	NA	0.314	NA	0.025583
DIS3L	1	0	0	1	0	NA	NA	0.102319537194858	NA	NA	NA	4.1711328378262e-05	NA	NA	NA	0.335	NA	0.0255799
SEC23IP	1	0	0	1	0	NA	NA	0.102308995783938	NA	NA	NA	1.84994147913813e-07	NA	NA	NA	0.261	NA	0.0255772
NFIL3	1	0	1	0	0	NA	0.102230579416888	NA	NA	NA	2.02028667996126e-10	NA	NA	NA	0.212	NA	NA	0.0255576
MCRS1	1	0	0	0	1	NA	NA	NA	0.102227045912111	NA	NA	NA	2.93396602751502e-10	NA	NA	NA	0.423	0.0255568
RNF185	1	0	0	1	0	NA	NA	0.102212741197888	NA	NA	NA	3.7075192625732e-06	NA	NA	NA	0.339	NA	0.0255532
CAP2	1	0	0	0	1	NA	NA	NA	0.1021629428588	NA	NA	NA	2.16325546908303e-06	NA	NA	NA	0.846	0.0255407
UBE2D1	1	0	0	1	0	NA	NA	0.102067344013545	NA	NA	NA	9.24282374841137e-05	NA	NA	NA	0.245	NA	0.0255168
ZNF655	1	0	0	1	0	NA	NA	0.102060799532343	NA	NA	NA	2.84987014681433e-06	NA	NA	NA	0.457	NA	0.0255152
FNDC10	1	0	1	0	0	NA	0.102045305472722	NA	NA	NA	2.54954581140681e-09	NA	NA	NA	0.275	NA	NA	0.0255113
GPBP1L1	1	0	1	0	0	NA	0.102034905861545	NA	NA	NA	5.77230231840509e-10	NA	NA	NA	0.322	NA	NA	0.0255087
DDX50	1	0	0	1	0	NA	NA	0.102027662261194	NA	NA	NA	3.97582561976143e-05	NA	NA	NA	0.286	NA	0.0255069
KPTN	1	0	0	1	0	NA	NA	0.102027662261194	NA	NA	NA	2.57415221379308e-08	NA	NA	NA	0.212	NA	0.0255069
PNPLA7	1	0	0	1	0	NA	NA	0.102027662261194	NA	NA	NA	8.28064061246867e-06	NA	NA	NA	0.245	NA	0.0255069
SAP30L	1	0	1	0	0	NA	0.101994045290539	NA	NA	NA	2.59171937377021e-07	NA	NA	NA	0.292	NA	NA	0.0254985
SOCS7	1	0	0	1	0	NA	NA	0.101989535795703	NA	NA	NA	4.39036082317895e-05	NA	NA	NA	0.29	NA	0.0254974
TNRC18	1	0	0	1	0	NA	NA	0.10192585864029	NA	NA	NA	4.30781309940343e-05	NA	NA	NA	0.412	NA	0.0254815
PPP1R21	1	0	0	0	1	NA	NA	NA	0.101911834651176	NA	NA	NA	1.54392729384161e-10	NA	NA	NA	0.349	0.025478
HTRA2	1	0	0	0	1	NA	NA	NA	0.101888155878682	NA	NA	NA	1.26886767795822e-10	NA	NA	NA	0.337	0.025472
KMT2B	1	0	0	1	0	NA	NA	0.101872833540157	NA	NA	NA	2.72998904952102e-05	NA	NA	NA	0.278	NA	0.0254682
TENM3	1	0	0	0	1	NA	NA	NA	0.10182964842274	NA	NA	NA	1.54936581460212e-10	NA	NA	NA	0.368	0.0254574
NTAN1	1	0	1	0	0	NA	0.10177742988344	NA	NA	NA	2.04761436159099e-08	NA	NA	NA	0.246	NA	NA	0.0254444
GADD45G	1	0	0	0	1	NA	NA	NA	0.101717095446966	NA	NA	NA	1.0488588240142e-10	NA	NA	NA	0.317	0.0254293
LRRC37B	1	0	0	1	0	NA	NA	0.101702101683704	NA	NA	NA	2.41987329985808e-07	NA	NA	NA	0.249	NA	0.0254255
STX5	1	0	0	0	1	NA	NA	NA	0.101660994570094	NA	NA	NA	6.8738690555266e-09	NA	NA	NA	0.387	0.0254152
ERCC1	1	0	0	0	1	NA	NA	NA	0.101659889049845	NA	NA	NA	8.24354027281097e-09	NA	NA	NA	0.433	0.025415
GAS8	1	0	1	0	0	NA	0.10164102936082	NA	NA	NA	8.02792728458057e-09	NA	NA	NA	0.352	NA	NA	0.0254103
STAT4	1	0	0	0	1	NA	NA	NA	0.101590893104237	NA	NA	NA	8.44561689427061e-13	NA	NA	NA	0.207	0.0253977
GFM2	1	0	0	0	1	NA	NA	NA	0.101541646384642	NA	NA	NA	7.66172544782778e-09	NA	NA	NA	0.31	0.0253854
MAPK8IP3	1	0	0	1	0	NA	NA	0.101541528815833	NA	NA	NA	0.000400621501784365	NA	NA	NA	0.886	NA	0.0253854
RAD50	1	0	0	0	1	NA	NA	NA	0.101485232200365	NA	NA	NA	4.51817833204438e-09	NA	NA	NA	0.387	0.0253713
PARP6	1	0	0	1	0	NA	NA	0.101443606954024	NA	NA	NA	3.14039434943446e-05	NA	NA	NA	0.473	NA	0.0253609
GCAT	1	0	0	1	0	NA	NA	0.101404117941836	NA	NA	NA	3.80718384811214e-06	NA	NA	NA	0.363	NA	0.025351
MTFR1L	1	0	0	0	1	NA	NA	NA	0.101390357941868	NA	NA	NA	1.12640124086836e-08	NA	NA	NA	0.56	0.0253476
BBS1	1	0	0	0	1	NA	NA	NA	0.10136000901407	NA	NA	NA	2.36649255580603e-09	NA	NA	NA	0.344	0.02534
ING5	1	0	1	0	0	NA	0.101321597175136	NA	NA	NA	1.22393494297395e-08	NA	NA	NA	0.28	NA	NA	0.0253304
STEAP2	1	1	0	0	0	0.101292007991515	NA	NA	NA	2.92505229555032e-08	NA	NA	NA	0.445	NA	NA	NA	0.025323
LETM1	1	0	1	0	0	NA	0.101252151054998	NA	NA	NA	5.63632941255039e-07	NA	NA	NA	0.331	NA	NA	0.025313
NEIL1	1	0	0	0	1	NA	NA	NA	0.101250711470647	NA	NA	NA	3.47005512385898e-09	NA	NA	NA	0.248	0.0253127
GOLPH3L	1	0	0	0	1	NA	NA	NA	0.101238522788412	NA	NA	NA	7.44371462724392e-10	NA	NA	NA	0.296	0.0253096
CKAP4	1	0	0	1	0	NA	NA	0.1011589673262	NA	NA	NA	2.56512379165243e-06	NA	NA	NA	0.322	NA	0.0252897
RABL2A	1	0	1	0	0	NA	0.101105924264648	NA	NA	NA	1.96624198990558e-08	NA	NA	NA	0.174	NA	NA	0.0252765
ATE1	1	0	0	0	1	NA	NA	NA	0.101061190311721	NA	NA	NA	3.40802083693756e-10	NA	NA	NA	0.325	0.0252653
C14orf119	1	0	1	0	0	NA	0.101044568798288	NA	NA	NA	1.74525294696003e-08	NA	NA	NA	0.258	NA	NA	0.0252611
VIPR1	1	0	0	0	1	NA	NA	NA	0.10094216192331	NA	NA	NA	2.08019902921964e-08	NA	NA	NA	0.337	0.0252355
PCGF1	1	0	0	1	0	NA	NA	0.100907725192439	NA	NA	NA	7.21947289235351e-09	NA	NA	NA	0.237	NA	0.0252269
TNNT2	1	1	0	0	0	0.100885984035896	NA	NA	NA	5.15419857586624e-09	NA	NA	NA	0.24	NA	NA	NA	0.0252215
DUSP23	1	0	0	0	1	NA	NA	NA	0.100844754581966	NA	NA	NA	1.62819992956434e-08	NA	NA	NA	0.356	0.0252112
CLOCK	1	0	0	1	0	NA	NA	0.100788900114008	NA	NA	NA	0.00012079564175666	NA	NA	NA	0.306	NA	0.0251972
TNRC6B	1	0	0	0	1	NA	NA	NA	0.10075238505654	NA	NA	NA	9.93113957576014e-09	NA	NA	NA	0.464	0.0251881
TRAPPC1	1	0	0	0	1	NA	NA	NA	0.100725714048524	NA	NA	NA	4.65501611791379e-05	NA	NA	NA	0.673	0.0251814
PDHB	1	0	0	1	0	NA	NA	0.100722956627552	NA	NA	NA	0.000371152198165395	NA	NA	NA	0.563	NA	0.0251807
DCTD	1	0	0	0	1	NA	NA	NA	0.100683726425756	NA	NA	NA	5.16894981174313e-10	NA	NA	NA	0.392	0.0251709
TENM1	1	0	0	1	0	NA	NA	0.100600770906314	NA	NA	NA	8.70982639483066e-07	NA	NA	NA	0.302	NA	0.0251502
ADCY6	1	0	0	0	1	NA	NA	NA	0.100599760659928	NA	NA	NA	9.99216578977993e-10	NA	NA	NA	0.325	0.0251499
CDC42SE1	1	0	0	0	1	NA	NA	NA	0.100553239719052	NA	NA	NA	6.16326340738351e-10	NA	NA	NA	0.382	0.0251383
PNPLA6	1	0	0	1	0	NA	NA	0.100532116932316	NA	NA	NA	0.000123244340874137	NA	NA	NA	0.682	NA	0.025133
MAPKBP1	1	0	0	1	0	NA	NA	0.10048691272229	NA	NA	NA	8.45856188431497e-06	NA	NA	NA	0.376	NA	0.0251217
IFFO2	1	0	0	1	0	NA	NA	0.100477211095812	NA	NA	NA	2.44660170186354e-07	NA	NA	NA	0.241	NA	0.0251193
TMEM121B	1	0	0	1	0	NA	NA	0.100467698203465	NA	NA	NA	1.83114920673818e-07	NA	NA	NA	0.208	NA	0.0251169
NOVA2	1	0	0	0	1	NA	NA	NA	0.100446032359713	NA	NA	NA	1.01273498927617e-05	NA	NA	NA	0.579	0.0251115
ZNF827	1	0	0	0	1	NA	NA	NA	0.10043130622893	NA	NA	NA	8.74029928736776e-10	NA	NA	NA	0.248	0.0251078
TLE2	1	0	0	1	0	NA	NA	0.100415658688114	NA	NA	NA	2.14437716375154e-06	NA	NA	NA	0.22	NA	0.0251039
USP9Y	1	0	0	1	0	NA	NA	0.10041073084407	NA	NA	NA	6.01933835167511e-05	NA	NA	NA	0.359	NA	0.0251027
ABCF3	1	0	1	0	0	NA	0.100404133457053	NA	NA	NA	9.38400424916111e-09	NA	NA	NA	0.297	NA	NA	0.025101
TEX264	1	0	0	0	1	NA	NA	NA	0.100395120232907	NA	NA	NA	6.54874070881531e-09	NA	NA	NA	0.409	0.0250988
GOLGA7B	1	1	0	0	0	0.100383836019027	NA	NA	NA	9.85596275136838e-08	NA	NA	NA	0.466	NA	NA	NA	0.025096
ZNF248	1	0	0	1	0	NA	NA	0.100343813709021	NA	NA	NA	2.50629533802918e-06	NA	NA	NA	0.335	NA	0.025086
SPR	1	0	0	0	1	NA	NA	NA	0.100330086531491	NA	NA	NA	6.07692431485477e-08	NA	NA	NA	0.279	0.0250825
CEBPG	1	0	1	0	0	NA	0.100307014354182	NA	NA	NA	7.41631959121247e-09	NA	NA	NA	0.271	NA	NA	0.0250768
IFT46	1	0	1	0	0	NA	0.100287205787998	NA	NA	NA	3.38704295473705e-09	NA	NA	NA	0.267	NA	NA	0.0250718
URM1	1	0	0	1	0	NA	NA	0.100257078770937	NA	NA	NA	2.80008748808914e-05	NA	NA	NA	0.351	NA	0.0250643
SPINDOC	1	0	0	0	1	NA	NA	NA	0.100238340887051	NA	NA	NA	2.2067374730358e-10	NA	NA	NA	0.228	0.0250596
PPOX	1	0	0	1	0	NA	NA	0.100209695511434	NA	NA	NA	1.96168027060238e-06	NA	NA	NA	0.273	NA	0.0250524
HEATR5B	1	0	1	0	0	NA	0.100165552321019	NA	NA	NA	1.30691020180906e-08	NA	NA	NA	0.237	NA	NA	0.0250414
NMRK1	1	0	1	0	0	NA	0.100093613685952	NA	NA	NA	1.82048608191458e-07	NA	NA	NA	0.25	NA	NA	0.0250234
PPARD	1	0	0	0	1	NA	NA	NA	0.100043934540956	NA	NA	NA	3.50665581365666e-08	NA	NA	NA	0.274	0.025011

## Sheet: Layer 5_up_DEG
The following spreadsheets are derived from DEGs analysis for layer 1 to layer 6, and white matter. In those spreadsheets, column A indicates gene ID. Column B indicates the number of overlapping genes from four samples. Column G to column J indicates the log fold change of four samples in the same order. Column K to column N indicates the p-value. Column O to column R indicates the proportion of…
Gene	contribution summary					logFC (e as base, cutoff >= 0.1)				p-value (Wilcoxon test, cutoff <= 0.05)				proportion of spots express the gene in this layer				mean logFC (e as base) of four samples	GO enrichment analysis									KEGG pathway analysis									Reactome analysis
ID	overlap	CT2.contribute	CT1.contribute	AD1.contribute	AD2.contribute	CT2.Layer 1_up_logFC	CT1.Layer 1_up_logFC	AD1.Layer 1_up_logFC	AD2.Layer 1_up_logFC	CT2.Layer 1_up_pval	CT1.Layer 1_up_pval	AD1.Layer 1_up_pval	AD2.Layer 1_up_pval	CT2.Layer 1_pct.1	CT1.Layer 1_pct.1	AD1.Layer 1_pct.1	AD2.Layer 1_pct.1	mean_logfc	ID	Description	GeneRatio	BgRatio	pvalue	p.adjust	qvalue	geneID	Count	ID	Description	GeneRatio	BgRatio	pvalue	p.adjust	qvalue	geneID	Count	ID	Description	GeneRatio	BgRatio	pvalue	p.adjust	qvalue	geneID	Count
GLT1D1	4	1	1	1	1	0.107409185947149	0.145483006673912	0.12217241635522	0.129506499352443	5.77692288891331e-10	4.58123732029756e-17	1.15023189815595e-12	1.30833684490475e-20	0.321	0.295	0.369	0.337	0.126143	GO:0019693	ribose phosphate metabolic process	23/339	427/18866	3.1735e-06	0.00427879	0.00381984	ACOT7/NUDT14/SUCLA2/SEH1L/MPP1/SULT4A1/PDE1A/PGM2L1/HK1/PID1/ATP5PD/ENTPD4/GPI/PDHA1/NUP50/STOML2/POM121/ELOVL4/VPS9D1/DNAJC30/NUP58/DLG1/PGAM1	23	hsa04721	Synaptic vesicle cycle	10/169	78/8108	4.39589e-06	0.00112974	0.00103188	STX1B/ATP6V0E2/ATP6V1C1/STX1A/DNM1/ATP6V1A/AP2S1/ATP6V0C/CLTC/ATP6V0A1	10	R-HSA-70326	Glucose metabolism	10/225	91/10704	2.00148e-05	0.0150715	0.0128782	SEH1L/PGM2L1/GOT1/HK1/GPI/NUP50/MDH2/POM121/NUP58/PGAM1	10
JCAD	4	1	1	1	1	0.112415974286228	0.119391195106677	0.116938079794179	0.13708076491393	9.70987508126192e-12	1.07654924888754e-13	2.07065654849052e-12	1.61717784303105e-26	0.323	0.269	0.328	0.374	0.121457	GO:0072659	protein localization to plasma membrane	18/339	281/18866	3.60607e-06	0.00427879	0.00381984	ATP1B1/STAC2/MYADM/ACTN2/PREPL/BCL2L1/PRKCZ/TTC7B/PID1/CLTC/ITGB1BP1/DPP10/AFDN/DLG1/GOLPH3/GGA3/SEC23A/BAG4	18	hsa01200	Carbon metabolism	10/169	115/8108	0.000134198	0.0172444	0.0157506	SUCLA2/GOT1/IDH3A/HK1/GPI/GPI/PDHA1/ME3/ACAT2/MDH2/PGAM1	10	R-HSA-168799	Neurotoxicity of clostridium toxins	4/225	10/10704	3.61426e-05	0.0150715	0.0128782	STX1B/STX1A/SV2A/VAMP1	4
ACOT7	3	1	0	1	1	0.217774412936735	NA	0.173666409842436	0.156625304472352	1.05295161953422e-20	NA	6.2252317896568e-13	7.19261372373262e-20	0.746	NA	0.815	0.883	0.137017	GO:0046034	ATP metabolic process	19/339	311/18866	3.86871e-06	0.00427879	0.00381984	ATP1B1/SEH1L/PGM2L1/HK1/PID1/ATP5PD/ATP6V1A/COA6/NDUFB11/GPI/NUP50/STOML2/NDUFB10/POM121/VPS9D1/NDUFA8/DNAJC30/NUP58/PGAM1	19	hsa04966	Collecting duct acid secretion	5/169	27/8108	0.000206381	0.0176799	0.0161484	ATP6V0E2/ATP6V1C1/ATP6V1A/ATP6V0C/ATP6V0A1	5	R-HSA-70171	Glycolysis	8/225	71/10704	0.000114573	0.0318514	0.0272162	SEH1L/PGM2L1/HK1/GPI/NUP50/POM121/NUP58/PGAM1	8
SMAP1	3	1	0	1	1	0.114837572846586	NA	0.165988619194718	0.197439791955002	3.81316888028033e-10	NA	1.76739056752243e-16	1.36992046346024e-41	0.419	NA	0.519	0.495	0.119566	GO:0098693	regulation of synaptic vesicle cycle	11/339	114/18866	6.63717e-06	0.004627	0.0041307	STX1B/STX1A/SYN1/PRKAR1B/DNM1/SYP/PREPL/GSK3B/STXBP5L/VAMP1/PFN2	11	hsa05014	Amyotrophic lateral sclerosis	18/169	365/8108	0.000573227	0.0320957	0.0293154	SEH1L/ACTR10/BCL2L1/TUBA4A/ATP5PD/PSMD12/PSMD7/NDUFB11/NUP50/KLC1/PSMD13/NDUFB10/POM121/NDUFA8/NUP58/ACTR1B/MAPK11/PFN2	18	R-HSA-77387	Insulin receptor recycling	5/225	26/10704	0.000180012	0.0375324	0.0320705	ATP6V0E2/ATP6V1C1/ATP6V1A/ATP6V0C/ATP6V0A1	5
OAZ1	3	1	0	1	1	0.178618504790116	NA	0.165116937850224	0.12313812982984	3.75951350555778e-25	NA	7.85958472029224e-19	1.11026903773336e-22	0.994	NA	1	0.999	0.116718	GO:0009259	ribonucleotide metabolic process	22/339	416/18866	6.97258e-06	0.004627	0.0041307	ACOT7/SUCLA2/SEH1L/MPP1/SULT4A1/PDE1A/PGM2L1/HK1/PID1/ATP5PD/ENTPD4/GPI/PDHA1/NUP50/STOML2/POM121/ELOVL4/VPS9D1/DNAJC30/NUP58/DLG1/PGAM1	22	hsa05016	Huntington disease	16/169	306/8108	0.000624431	0.0320957	0.0293154	POLR2H/STX1A/ACTR10/TUBA4A/ATP5PD/PSMD12/VDAC3/PSMD7/NDUFB11/AP2S1/CLTC/KLC1/PSMD13/NDUFB10/NDUFA8/ACTR1B	16	R-HSA-2132295	MHC class II antigen presentation	10/225	123/10704	0.000260314	0.0434204	0.0371016	KIFAP3/ACTR10/DNM1/TUBA4A/DYNC1H1/AP2S1/CLTC/KLC1/ACTR1B/SEC23A	10
KIFAP3	3	1	0	1	1	0.136609284097027	NA	0.187160946241489	0.131477891594976	4.94922245080175e-10	NA	2.29525060420078e-12	1.98648173256685e-13	0.782	NA	0.813	0.803	0.113812	GO:0009150	purine ribonucleotide metabolic process	21/339	401/18866	1.30864e-05	0.00512989	0.00457965	ACOT7/SUCLA2/SEH1L/MPP1/SULT4A1/PDE1A/PGM2L1/HK1/PID1/ATP5PD/GPI/PDHA1/NUP50/STOML2/POM121/ELOVL4/VPS9D1/DNAJC30/NUP58/DLG1/PGAM1	21	hsa04360	Axon guidance	11/169	182/8108	0.00143523	0.0614757	0.0561502	KRAS/NTN4/CFL1/EPHB6/EPHB6/GSK3B/SLIT3/PRKCZ/ROBO2/MYL12B/EPHA5/RASA1	11	R-HSA-162909	Host Interactions of HIV factors	10/225	130/10704	0.000406881	0.0468581	0.040039	SEH1L/PPIA/PSMD12/PSMD7/AP2S1/BTRC/NUP50/PSMD13/POM121/NUP58	10
NDUFAF4	3	1	0	1	1	0.158839318440945	NA	0.135683400798523	0.153437086176707	5.42363880816151e-16	NA	4.32718297713742e-13	1.30560964528089e-29	0.457	NA	0.492	0.478	0.11199	GO:2000300	regulation of synaptic vesicle exocytosis	9/339	80/18866	1.32714e-05	0.00512989	0.00457965	STX1B/STX1A/SYN1/SYP/PREPL/GSK3B/STXBP5L/VAMP1/PFN2	9	hsa00190	Oxidative phosphorylation	9/169	134/8108	0.00188613	0.0692479	0.0632491	ATP6V0E2/ATP6V1C1/ATP5PD/ATP6V1A/NDUFB11/ATP6V0C/ATP6V0A1/NDUFB10/NDUFA8	9	R-HSA-917977	Transferrin endocytosis and recycling	5/225	31/10704	0.000426854	0.0468581	0.040039	ATP6V0E2/ATP6V1C1/ATP6V1A/ATP6V0C/ATP6V0A1	5
PEBP1	3	1	0	1	1	0.156265201650032	NA	0.140586691740362	0.149097292682399	1.08906332142595e-28	NA	2.78908562331935e-21	3.2191390747174e-36	1	NA	1	1	0.111487	GO:1990778	protein localization to cell periphery	19/339	340/18866	1.37973e-05	0.00512989	0.00457965	ATP1B1/STAC2/STX1B/MYADM/ACTN2/PREPL/BCL2L1/PRKCZ/TTC7B/PID1/CLTC/ITGB1BP1/DPP10/AFDN/DLG1/GOLPH3/GGA3/SEC23A/BAG4	19	hsa04144	Endocytosis	13/169	252/8108	0.00228278	0.0733342	0.0669815	SMAP1/ARFGEF2/DNM1/IQSEC1/RAB11FIP5/PRKCZ/ARRB1/TSG101/AP2S1/CLTC/IQSEC3/IQSEC3/RNF41/VPS26A	13	R-HSA-3371453	Regulation of HSF1-mediated heat shock response	7/225	69/10704	0.000589185	0.0468581	0.040039	SEH1L/GSK3B/NUP50/HSF1/POM121/NUP58/BAG4	7
PNMA8B	3	1	0	1	1	0.145371317617096	NA	0.136581577281541	0.156040277581128	5.76211991816364e-11	NA	6.09537427245438e-08	7.14796746104474e-20	0.788	NA	0.803	0.814	0.109498	GO:0016236	macroautophagy	18/339	310/18866	1.39147e-05	0.00512989	0.00457965	TECPR1/VPS13D/ATP6V0E2/ATP6V1C1/RALB/CDC37/ATG9A/ATP6V1A/VPS41/TSG101/ATP6V0C/ATP6V0A1/GABARAPL1/CAPNS1/SCFD1/RNF41/VPS26A/SNX14	18	hsa00620	Pyruvate metabolism	5/169	47/8108	0.00280316	0.0763919	0.0697743	PDHA1/ME3/ACAT2/MDH2/ACYP1	5	R-HSA-4085377	SUMOylation of SUMOylation proteins	5/225	34/10704	0.000664134	0.0468581	0.040039	SEH1L/NUP50/SUMO1/POM121/NUP58	5
TECPR1	3	1	0	1	1	0.111847614239874	NA	0.177859519297122	0.147210479046318	1.32662086178455e-11	NA	4.05531502930656e-20	1.01920033770758e-26	0.406	NA	0.463	0.407	0.109229	GO:0072521	purine-containing compound metabolic process	23/339	472/18866	1.6201e-05	0.00537548	0.0047989	ACOT7/SUCLA2/SEH1L/MPP1/SULT4A1/PDE1A/HPCA/PGM2L1/HK1/PID1/ATP5PD/AHCY/GPI/PDHA1/NUP50/STOML2/POM121/ELOVL4/VPS9D1/DNAJC30/NUP58/DLG1/PGAM1	23	hsa05120	Epithelial cell signaling in Helicobacter pylori infection	6/169	70/8108	0.00326784	0.0763919	0.0697743	ATP6V0E2/ATP6V1C1/ATP6V1A/ATP6V0C/ATP6V0A1/MAPK11	6	R-HSA-2682334	EPH-Ephrin signaling	8/225	92/10704	0.000687408	0.0468581	0.040039	CFL1/EPHB6/DNM1/AP2S1/CLTC/MYL12B/EPHA5/RASA1	8
ATP1B1	3	1	0	1	1	0.135750221069085	NA	0.132001429909707	0.165878853450667	4.08280239818316e-17	NA	1.5222260111326e-13	2.56850043236239e-33	0.996	NA	1	0.999	0.108408	GO:0006163	purine nucleotide metabolic process	22/339	442/18866	1.79281e-05	0.00540778	0.00482773	ACOT7/SUCLA2/SEH1L/MPP1/SULT4A1/PDE1A/HPCA/PGM2L1/HK1/PID1/ATP5PD/GPI/PDHA1/NUP50/STOML2/POM121/ELOVL4/VPS9D1/DNAJC30/NUP58/DLG1/PGAM1	22	hsa00020	Citrate cycle (TCA cycle)	4/169	30/8108	0.00326969	0.0763919	0.0697743	SUCLA2/IDH3A/PDHA1/MDH2	4	R-HSA-1169408	ISG15 antiviral mechanism	7/225	72/10704	0.000762817	0.0468581	0.040039	SEH1L/NUP50/STAT1/POM121/ARIH1/EIF4E3/NUP58	7
ITFG1	3	1	0	1	1	0.144391638370255	NA	0.149749133532568	0.138907395033233	6.69221460673301e-11	NA	3.00333172532997e-10	3.17435559530077e-16	0.795	NA	0.824	0.806	0.108262	GO:0046928	regulation of neurotransmitter secretion	10/339	106/18866	2.12653e-05	0.00587985	0.00524917	STX1B/STX1A/SYN1/SYP/PREPL/GSK3B/STXBP5L/VAMP1/KCNC4/PFN2	10	hsa05110	Vibrio cholerae infection	5/169	50/8108	0.00368273	0.0788719	0.0720394	ATP6V0E2/ATP6V1C1/ATP6V1A/ATP6V0C/ATP6V0A1	5	R-HSA-191859	snRNP Assembly	6/225	53/10704	0.000811776	0.0468581	0.040039	SEH1L/NUP50/POM121/SNRPB/NUP58/SNRPF	6
RSPO3	3	0	1	1	1	NA	0.133101311548328	0.142615910053503	0.15111418564412	NA	1.36368854775921e-34	1.56078146595826e-19	7.54760152990856e-52	NA	0.168	0.251	0.191	0.106708	GO:0033572	transferrin transport	6/339	36/18866	3.97943e-05	0.0101567	0.00906731	ATP6V0E2/ATP6V1C1/ATP6V1A/ATP6V0C/CLTC/ATP6V0A1	6	hsa04070	Phosphatidylinositol signaling system	7/169	97/8108	0.00402174	0.0795068	0.0726193	INPP5F/INPP4A/IMPA1/IP6K1/MTMR4/INPP5E/PIP4P1	7	R-HSA-194441	Metabolism of non-coding RNA	6/225	53/10704	0.000811776	0.0468581	0.040039	SEH1L/NUP50/POM121/SNRPB/NUP58/SNRPF	6
NUDT14	3	1	0	1	1	0.124830557308256	NA	0.16628709923353	0.134984727268103	2.94142598528514e-10	NA	1.69136829327787e-18	2.67723907833951e-22	0.414	NA	0.454	0.434	0.106526	GO:0009185	ribonucleoside diphosphate metabolic process	11/339	139/18866	4.32754e-05	0.0102563	0.00915616	SEH1L/MPP1/PGM2L1/HK1/ENTPD4/GPI/NUP50/POM121/NUP58/DLG1/PGAM1	11	hsa00100	Steroid biosynthesis	3/169	20/8108	0.00781329	0.14343	0.131005	EBP/DHCR24/MSMO1	3	R-HSA-1222556	ROS and RNS production in phagocytes	5/225	36/10704	0.000869621	0.0468581	0.040039	ATP6V0E2/ATP6V1C1/ATP6V1A/ATP6V0C/ATP6V0A1	5
SUCLA2	3	1	0	1	1	0.139275118771412	NA	0.140536634280436	0.141682542993753	1.0542473208168e-14	NA	3.31182580717274e-15	2.70948893901291e-20	0.517	NA	0.618	0.56	0.105374	GO:0099003	vesicle-mediated transport in synapse	14/339	220/18866	4.69117e-05	0.0103769	0.00926383	STX1B/STX1A/SYN1/PRKAR1B/DNM1/HPCA/SYP/RAB27B/PREPL/GSK3B/STXBP5L/SV2A/VAMP1/PFN2	14	hsa05020	Prion disease	12/169	273/8108	0.0115907	0.198588	0.181385	TUBA4A/GSK3B/ATP5PD/PSMD12/VDAC3/PSMD7/NDUFB11/KLC1/PSMD13/NDUFB10/NDUFA8/MAPK11	12	R-HSA-373760	L1CAM interactions	9/225	119/10704	0.000891359	0.0468581	0.040039	CNTNAP1/CD24/DNM1/TUBA4A/SPTAN1/AP2S1/CLTC/NRCAM/DLG1	9
VPS13D	3	1	0	1	1	0.158251011017673	NA	0.113197896721899	0.149717450385027	1.09709855070247e-14	NA	3.0804132746488e-10	1.6520684905406e-24	0.534	NA	0.485	0.506	0.105292	GO:0051588	regulation of neurotransmitter transport	10/339	120/18866	6.20955e-05	0.0123026	0.010983	STX1B/STX1A/SYN1/SYP/PREPL/GSK3B/STXBP5L/VAMP1/KCNC4/PFN2	10	hsa05012	Parkinson disease	11/169	249/8108	0.0148678	0.224766	0.205295	BCL2L1/TUBA4A/ATP5PD/PSMD12/VDAC3/PSMD7/NDUFB11/KLC1/PSMD13/NDUFB10/NDUFA8	11	R-HSA-111367	SLBP independent Processing of Histone Pre-mRNAs	3/225	10/10704	0.000985982	0.0468581	0.040039	LSM11/SNRPB/SNRPF	3
SGSM1	3	1	0	1	1	0.123211524001479	NA	0.133080971151107	0.144144092652189	7.66290094918825e-13	NA	1.47321491037292e-14	1.41332853191059e-24	0.308	NA	0.392	0.381	0.100109	GO:0016079	synaptic vesicle exocytosis	10/339	121/18866	6.66285e-05	0.0123026	0.010983	STX1B/STX1A/SYN1/SYP/PREPL/GSK3B/STXBP5L/SV2A/VAMP1/PFN2	10	hsa05132	Salmonella infection	11/169	249/8108	0.0148678	0.224766	0.205295	ACTR10/TUBA4A/AHNAK2/VPS41/DYNC1H1/KLC1/MYL12B/ACTR1B/MAPK11/ARL8A/PFN2	11	R-HSA-3215018	Processing and activation of SUMO	3/225	10/10704	0.000985982	0.0468581	0.040039	SAE1/SUMO1/UBA2	3
KRAS	3	1	0	1	1	0.104207993868398	NA	0.153282349034082	0.141761943041826	1.53031370347646e-10	NA	5.03717350164238e-18	2.58374482407223e-24	0.32	NA	0.456	0.397	0.0998131	GO:0099504	synaptic vesicle cycle	13/339	199/18866	6.6741e-05	0.0123026	0.010983	STX1B/STX1A/SYN1/PRKAR1B/DNM1/SYP/RAB27B/PREPL/GSK3B/STXBP5L/SV2A/VAMP1/PFN2	13	hsa04137	Mitophagy - animal	5/169	72/8108	0.0168828	0.231648	0.211581	KRAS/BCL2L1/ATG9A/GABARAPL1/TBC1D17	5	R-HSA-71403	Citric acid cycle (TCA cycle)	4/225	22/10704	0.00103235	0.0468581	0.040039	SUCLA2/IDH3A/ME3/MDH2	4
RXFP1	3	1	0	1	1	0.128260918873829	NA	0.120628958229194	0.148412779897298	8.75994216480817e-29	NA	2.11880961799922e-15	4.81449175730308e-47	0.186	NA	0.284	0.235	0.0993257	GO:0016241	regulation of macroautophagy	12/339	176/18866	8.42835e-05	0.0140591	0.0125511	VPS13D/ATP6V0E2/ATP6V1C1/RALB/CDC37/ATP6V1A/ATP6V0C/ATP6V0A1/CAPNS1/SCFD1/RNF41/VPS26A	12	hsa00562	Inositol phosphate metabolism	5/169	73/8108	0.0178278	0.231648	0.211581	INPP5F/INPP4A/IMPA1/MTMR4/INPP5E	5	R-HSA-3232142	SUMOylation of ubiquitinylation proteins	5/225	38/10704	0.00111906	0.0468581	0.040039	SEH1L/NUP50/SUMO1/POM121/NUP58	5
STAC2	3	1	0	1	1	0.115117594672538	NA	0.129441221106285	0.145158102414067	2.32099757923515e-11	NA	2.53922402655894e-15	4.98499378810279e-32	0.397	NA	0.322	0.311	0.0974292	GO:0006826	iron ion transport	8/339	79/18866	8.61075e-05	0.0140591	0.0125511	ATP6V0E2/SFXN1/ABCB6/ATP6V1C1/ATP6V1A/ATP6V0C/CLTC/ATP6V0A1	8	hsa00062	Fatty acid elongation	3/169	27/8108	0.0180271	0.231648	0.211581	ACOT7/ELOVL4/MECR	3	R-HSA-5619115	Disorders of transmembrane transporters	11/225	175/10704	0.00116109	0.0468581	0.040039	SEH1L/ABCB6/SLC9A6/HK1/PSMD12/PSMD7/NUP50/SLC27A4/PSMD13/POM121/NUP58	11
CNTNAP1	3	1	0	1	1	0.133208000705905	NA	0.153448375248497	0.10095323757451	2.93226391582215e-10	NA	1.01290997216751e-11	5.44710236031473e-10	0.803	NA	0.867	0.807	0.0969024	GO:0002478	antigen processing and presentation of exogenous peptide antigen	12/339	177/18866	8.89819e-05	0.0140591	0.0125511	KIFAP3/ACTR10/PSMD12/PSMD7/DYNC1H1/AP2S1/CLTC/KLC1/PSMD13/LNPEP/ACTR1B/SEC23A	12	hsa05022	Pathways of neurodegeneration - multiple diseases	17/169	476/8108	0.0205274	0.241662	0.220728	KRAS/STX1A/ACTR10/BCL2L1/TUBA4A/GSK3B/ATP5PD/PSMD12/VDAC3/PSMD7/NDUFB11/KLC1/PSMD13/NDUFB10/NDUFA8/ACTR1B/MAPK11	17	R-HSA-5358351	Signaling by Hedgehog	10/225	149/10704	0.00117988	0.0468581	0.040039	ULK3/PRKAR1B/TUBA4A/GSK3B/ARRB1/PSMD12/PSMD7/BTRC/PSMD13/PRKAR1A	10
SRCIN1	3	1	1	0	1	0.134921983898933	0.135436545728251	NA	0.113282893883618	6.00105568921452e-13	1.26980668884172e-11	NA	8.08702537947759e-16	0.494	0.403	NA	0.552	0.0959104	GO:0016925	protein sumoylation	8/339	82/18866	0.000112282	0.0167534	0.0149564	SAE1/SEH1L/STX1A/NUP50/SUMO1/POM121/NUP58/UBA2	8	hsa05165	Human papillomavirus infection	13/169	331/8108	0.020687	0.241662	0.220728	KRAS/ATP6V0E2/ATP6V1C1/GSK3B/COL6A1/PRKCZ/ATP6V1A/PPP2R2D/ATP6V0C/ATP6V0A1/PPP2R2A/STAT1/DLG1	13	R-HSA-77588	SLBP Dependent Processing of Replication-Dependent Histone Pre-mRNAs	3/225	11/10704	0.00133478	0.0506002	0.0432366	LSM11/SNRPB/SNRPF	3
FAM234B	3	1	0	1	1	0.104721191522822	NA	0.165472633266545	0.107781087183463	4.41706455200394e-08	NA	2.20292351678322e-13	3.5476356281008e-15	0.415	NA	0.504	0.475	0.0944937	GO:0009132	nucleoside diphosphate metabolic process	11/339	155/18866	0.000116133	0.0167534	0.0149564	SEH1L/MPP1/PGM2L1/HK1/ENTPD4/GPI/NUP50/POM121/NUP58/DLG1/PGAM1	11	hsa04961	Endocrine and other factor-regulated calcium reabsorption	4/169	53/8108	0.0241639	0.265592	0.242585	ATP1B1/DNM1/AP2S1/CLTC	4	R-HSA-1169410	Antiviral mechanism by IFN-stimulated genes	7/225	80/10704	0.0014279	0.0517767	0.0442419	SEH1L/NUP50/STAT1/POM121/ARIH1/EIF4E3/NUP58	7
SLC6A15	3	1	0	1	1	0.127892393388972	NA	0.112639225005207	0.132929719648965	3.63731788184862e-13	NA	2.60927318700458e-09	9.58010566299839e-21	0.34	NA	0.492	0.409	0.0933653	GO:0090383	phagosome acidification	5/339	28/18866	0.000127224	0.0175887	0.0157021	ATP6V0E2/ATP6V1C1/ATP6V1A/ATP6V0C/ATP6V0A1	5	hsa04530	Tight junction	8/169	169/8108	0.0248024	0.265592	0.242585	TUBA4A/PRKCZ/PPP2R2D/PPP2R2A/MYL6B/MYL12B/AFDN/DLG1	8	R-HSA-191273	Cholesterol biosynthesis	4/225	25/10704	0.00169928	0.0590498	0.0504566	EBP/DHCR24/MSMO1/ACAT2	4
ULK3	3	0	1	1	1	NA	0.120393725360028	0.140403094717765	0.112525556034392	NA	7.99963744038875e-09	3.04923508947295e-14	8.35756973394138e-15	NA	0.325	0.527	0.412	0.0933306	GO:0019884	antigen processing and presentation of exogenous antigen	12/339	185/18866	0.000135387	0.0179686	0.0160413	KIFAP3/ACTR10/PSMD12/PSMD7/DYNC1H1/AP2S1/CLTC/KLC1/PSMD13/LNPEP/ACTR1B/SEC23A	12	hsa05415	Diabetic cardiomyopathy	9/169	203/8108	0.0259196	0.266454	0.243372	GSK3B/PRKCZ/ATP5PD/VDAC3/NDUFB11/PDHA1/NDUFB10/NDUFA8/MAPK11	9	R-HSA-1483255	PI Metabolism	7/225	84/10704	0.00189704	0.0632272	0.054026	PITPNB/INPP5F/INPP4A/MTMR4/TNFAIP8L1/INPP5E/PIP4P1	7
STX1B	3	1	0	1	1	0.145418193883758	NA	0.104544180327062	0.12331401172162	1.38267666539223e-13	NA	6.02244038135126e-07	5.45639750599121e-15	0.947	NA	0.882	0.919	0.0933191	GO:0072583	clathrin-dependent endocytosis	6/339	45/18866	0.000145265	0.018538	0.0165496	SMAP1/INPP5F/AP2S1/CLTC/SGIP1/FNBP1L	6	hsa04136	Autophagy - other	3/169	32/8108	0.0283492	0.280221	0.255946	IGBP1/ATG9A/GABARAPL1	3	R-HSA-168325	Viral Messenger RNA Synthesis	5/225	43/10704	0.00197111	0.0632272	0.054026	SEH1L/POLR2H/NUP50/POM121/NUP58	5
CKMT1A	3	1	0	1	1	0.121659771033791	NA	0.126274576214503	0.118515065861926	2.819184918261e-10	NA	3.08845142912377e-12	5.49813788272468e-19	0.382	NA	0.386	0.385	0.0916124	GO:0042391	regulation of membrane potential	20/339	443/18866	0.000162852	0.0200127	0.0178661	ATP1B1/CNTNAP1/STX1B/GLRX/STX1A/ACTN2/GABRA5/GOT1/BCL2L1/GSK3B/PRKCZ/PID1/CELF4/NRCAM/SUMO1/STOML2/MPP2/FKBP1B/DLG1/DMD	20	hsa01212	Fatty acid metabolism	4/169	57/8108	0.0305911	0.281956	0.257531	ACAT2/ELOVL4/MECR/CPT1C	4	R-HSA-171007	p38MAPK events	3/225	13/10704	0.00224278	0.066755	0.0570404	KRAS/RALB/MAPK11	3
SAE1	3	1	0	1	1	0.142910141125486	NA	0.122897443673348	0.100627521033297	2.62349349668091e-13	NA	2.71768823562253e-10	2.66176156987337e-15	0.538	NA	0.556	0.516	0.0916088	GO:0009135	purine nucleoside diphosphate metabolic process	10/339	136/18866	0.000176651	0.0202113	0.0180434	SEH1L/MPP1/PGM2L1/HK1/GPI/NUP50/POM121/NUP58/DLG1/PGAM1	10	hsa04130	SNARE interactions in vesicular transport	3/169	33/8108	0.030719	0.281956	0.257531	STX1B/STX1A/VAMP1	3	R-HSA-9615933	Postmitotic nuclear pore complex (NPC) reformation	4/225	27/10704	0.0022813	0.066755	0.0570404	SEH1L/SUMO1/POM121/NUP58	4
ATP6V0E2	3	1	0	1	1	0.120476238810508	NA	0.114365839502793	0.131168132327606	3.49649788064822e-08	NA	1.63556151347695e-07	1.7288838124865e-16	0.865	NA	0.898	0.919	0.0915026	GO:0009179	purine ribonucleoside diphosphate metabolic process	10/339	136/18866	0.000176651	0.0202113	0.0180434	SEH1L/MPP1/PGM2L1/HK1/GPI/NUP50/POM121/NUP58/DLG1/PGAM1	10	hsa05131	Shigellosis	10/169	247/8108	0.0335537	0.297356	0.271596	TECPR1/BCL2L1/GSK3B/HK1/BTRC/MYL12B/CAPNS1/MAPK11/FNBP1L/PFN2	10	R-HSA-5368286	Mitochondrial translation initiation	7/225	87/10704	0.00232122	0.066755	0.0570404	MRPL37/MRPL15/MRPS11/MRPL27/MRPS18C/MRPL4/MTIF3	7
NTN4	3	1	1	1	0	0.109425017942154	0.127036588062252	0.128981671400167	NA	2.20769287667565e-15	1.6804335769422e-17	4.37290197421823e-17	NA	0.218	0.257	0.27	NA	0.0913608	GO:0010506	regulation of autophagy	17/339	347/18866	0.000194105	0.021468	0.0191653	VPS13D/ATP6V0E2/ATP6V1C1/EEF1A2/RALB/CDC37/GSK3B/ATP6V1A/ATP6V0C/ATP6V0A1/WDR6/MTMR4/CAPNS1/USP33/SCFD1/RNF41/VPS26A	17	hsa04071	Sphingolipid signaling pathway	6/169	119/8108	0.0378	0.316528	0.289109	KRAS/PRKCZ/PPP2R2D/PPP2R2A/SMPD1/MAPK11	6	R-HSA-4615885	SUMOylation of DNA replication proteins	5/225	45/10704	0.00241827	0.0672279	0.0574445	SEH1L/NUP50/SUMO1/POM121/NUP58	5
TIMM22	3	1	1	0	1	0.111504920314129	0.11878635548976	NA	0.135055400235401	2.54490927284783e-11	3.07319797924241e-13	NA	7.84815176606278e-25	0.284	0.257	NA	0.325	0.0913367	GO:1905476	negative regulation of protein localization to membrane	5/339	31/18866	0.000210447	0.0218807	0.0195338	BCL2L1/GDI1/PID1/CLTC/ITGB1BP1	5	hsa00500	Starch and sucrose metabolism	3/169	36/8108	0.0384321	0.316528	0.289109	PGM2L1/HK1/GPI/GPI	3	R-HSA-5610787	Hedgehog 'off' state	8/225	113/10704	0.00259617	0.0688642	0.0588427	PRKAR1B/TUBA4A/GSK3B/PSMD12/PSMD7/BTRC/PSMD13/PRKAR1A	8
SEH1L	3	1	0	1	1	0.109163354685878	NA	0.101662900536221	0.154111172093614	6.25316385199244e-09	NA	5.45785533442473e-09	9.37537149344528e-27	0.346	NA	0.421	0.446	0.0912344	GO:0048002	antigen processing and presentation of peptide antigen	12/339	194/18866	0.000211026	0.0218807	0.0195338	KIFAP3/ACTR10/PSMD12/PSMD7/DYNC1H1/AP2S1/CLTC/KLC1/PSMD13/LNPEP/ACTR1B/SEC23A	12	hsa04145	Phagosome	7/169	152/8108	0.0394121	0.316528	0.289109	ATP6V0E2/ATP6V1C1/TUBA4A/ATP6V1A/DYNC1H1/ATP6V0C/ATP6V0A1	7	R-HSA-3371556	Cellular response to heat stress	7/225	89/10704	0.00264227	0.0688642	0.0588427	SEH1L/GSK3B/NUP50/HSF1/POM121/NUP58/BAG4	7
IRGQ	3	1	0	1	1	0.13425390978577	NA	0.116118495570552	0.111602699057507	2.06992907789299e-13	NA	3.38787910935281e-11	2.17569138525195e-19	0.425	NA	0.436	0.4	0.0904938	GO:0050804	modulation of chemical synaptic transmission	20/339	454/18866	0.000224886	0.0225858	0.0201632	KRAS/STX1B/TPRG1L/STX1A/SYN1/PRKAR1B/CPEB3/DNM1/SYP/SYNGR1/PREPL/GSK3B/STXBP5L/PRKCZ/VAMP1/CELF4/LRRTM2/KCNC4/MPP2/PFN2	20	hsa05010	Alzheimer disease	13/169	369/8108	0.0442441	0.335937	0.306835	KRAS/TUBA4A/GSK3B/ATP5PD/PSMD12/VDAC3/PSMD7/NDUFB11/APBB1/KLC1/PSMD13/NDUFB10/NDUFA8	13	R-HSA-177504	Retrograde neurotrophin signalling	3/225	14/10704	0.00281047	0.0689393	0.0589069	DNM1/AP2S1/CLTC	3
RAB6A	3	1	0	1	1	0.124988559320477	NA	0.118814624498955	0.117307215624141	7.16934074893593e-09	NA	5.38989056051087e-06	2.60544152843425e-12	0.746	NA	0.774	0.828	0.0902776	GO:0099177	regulation of trans-synaptic signaling	20/339	455/18866	0.00023144	0.0225858	0.0201632	KRAS/STX1B/TPRG1L/STX1A/SYN1/PRKAR1B/CPEB3/DNM1/SYP/SYNGR1/PREPL/GSK3B/STXBP5L/PRKCZ/VAMP1/CELF4/LRRTM2/KCNC4/MPP2/PFN2	20	hsa05323	Rheumatoid arthritis	5/169	93/8108	0.044443	0.335937	0.306835	ATP6V0E2/ATP6V1C1/ATP6V1A/ATP6V0C/ATP6V0A1	5	R-HSA-5682910	LGI-ADAM interactions	3/225	14/10704	0.00281047	0.0689393	0.0589069	STX1B/STX1A/ADAM11	3
RALY	3	1	1	0	1	0.150776199688329	0.106880425184725	NA	0.102117146793751	2.24115851501114e-15	1.48816051029659e-10	NA	6.00081780355611e-16	0.491	0.418	NA	0.5	0.0899434	GO:1903828	negative regulation of cellular protein localization	9/339	116/18866	0.000248047	0.0235148	0.0209926	ACTN2/BCL2L1/GDI1/GSK3B/PID1/CLTC/ITGB1BP1/INPP5E/BAG4	9										R-HSA-4570464	SUMOylation of RNA binding proteins	5/225	47/10704	0.00293492	0.0692156	0.0591429	SEH1L/NUP50/SUMO1/POM121/NUP58	5
SPATA20	3	0	1	1	1	NA	0.117395559757726	0.1218930477265	0.120207941641492	NA	6.82648489272111e-10	1.33853403673574e-12	1.21537560819232e-19	NA	0.31	0.463	0.361	0.0898741	GO:0031503	protein-containing complex localization	15/339	291/18866	0.000267056	0.0246137	0.0219736	KIFAP3/STX1B/SEH1L/ENY2/KLHL21/DNM1/HPCA/KIF17/RALB/PRKCZ/NUP50/XPOT/POM121/NUP58/DLG1	15										R-HSA-186763	Downstream signal transduction	4/225	29/10704	0.00298772	0.0692156	0.0591429	KRAS/STAT6/STAT1/RASA1	4
PITPNB	3	1	0	1	1	0.124630457257563	NA	0.123491894543503	0.110173546068441	9.8149100053954e-11	NA	2.26798752424231e-11	2.604356033195e-13	0.485	NA	0.56	0.569	0.089574	GO:0019882	antigen processing and presentation	13/339	232/18866	0.000306539	0.0264865	0.0236455	KIFAP3/RAB6A/ACTR10/PSMD12/PSMD7/DYNC1H1/AP2S1/CLTC/KLC1/PSMD13/LNPEP/ACTR1B/SEC23A	13										R-HSA-442755	Activation of NMDA receptors and postsynaptic events	7/225	93/10704	0.00338581	0.0739333	0.0631741	KRAS/ACTN2/PRKAR1B/KIF17/TUBA4A/DLG1/PRKAR1A	7
ABHD16A	3	0	1	1	1	NA	0.120301016881772	0.118523050404996	0.118358860541419	NA	2.50138212549887e-10	3.36613085735345e-12	4.04090599599632e-20	NA	0.377	0.494	0.495	0.0892957	GO:0006099	tricarboxylic acid cycle	5/339	34/18866	0.000329766	0.0264865	0.0236455	SUCLA2/IDH3A/PDHA1/ME3/MDH2	5										R-HSA-5368287	Mitochondrial translation	7/225	93/10704	0.00338581	0.0739333	0.0631741	MRPL37/MRPL15/MRPS11/MRPL27/MRPS18C/MRPL4/MTIF3	7
BLOC1S2	3	1	0	1	1	0.125556315569931	NA	0.10735846407034	0.122341871511357	8.81066756844523e-12	NA	6.6456254822814e-09	3.12238041722101e-19	0.453	NA	0.483	0.49	0.0888142	GO:0006409	tRNA export from nucleus	5/339	34/18866	0.000329766	0.0264865	0.0236455	SEH1L/NUP50/XPOT/POM121/NUP58	5										R-HSA-168271	Transport of Ribonucleoproteins into the Host Nucleus	4/225	31/10704	0.00383053	0.0739333	0.0631741	SEH1L/NUP50/POM121/NUP58	4
PLEKHB2	3	1	0	1	1	0.123003389801103	NA	0.112856290077576	0.1173723901291	3.81644290214137e-09	NA	2.70427964067641e-06	5.91103857912918e-13	0.799	NA	0.853	0.872	0.088308	GO:0071431	tRNA-containing ribonucleoprotein complex export from nucleus	5/339	34/18866	0.000329766	0.0264865	0.0236455	SEH1L/NUP50/XPOT/POM121/NUP58	5										R-HSA-168333	NEP/NS2 Interacts with the Cellular Export Machinery	4/225	31/10704	0.00383053	0.0739333	0.0631741	SEH1L/NUP50/POM121/NUP58	4
TPRG1L	3	1	0	1	1	0.121948771552853	NA	0.122901514316709	0.107493942702988	2.09479913297461e-08	NA	3.03438430592528e-07	9.06524898911024e-12	0.741	NA	0.797	0.816	0.0880861	GO:0007269	neurotransmitter secretion	11/339	175/18866	0.000335272	0.0264865	0.0236455	STX1B/STX1A/SYN1/SYP/PREPL/GSK3B/STXBP5L/SV2A/VAMP1/KCNC4/PFN2	11										R-HSA-170822	Regulation of Glucokinase by Glucokinase Regulatory Protein	4/225	31/10704	0.00383053	0.0739333	0.0631741	SEH1L/NUP50/POM121/NUP58	4
CFL1	3	1	0	1	1	0.128653714304164	NA	0.10732178117271	0.115162675320478	2.40423378130146e-17	NA	8.55150305355042e-13	1.40314202694924e-21	1	NA	1	1	0.0877845	GO:0099643	signal release from synapse	11/339	175/18866	0.000335272	0.0264865	0.0236455	STX1B/STX1A/SYN1/SYP/PREPL/GSK3B/STXBP5L/SV2A/VAMP1/KCNC4/PFN2	11										R-HSA-5339562	Uptake and actions of bacterial toxins	4/225	31/10704	0.00383053	0.0739333	0.0631741	STX1B/STX1A/SV2A/VAMP1	4
FAM98A	3	1	0	1	1	0.110925001919225	NA	0.105655145139434	0.134465076125825	1.30348862903615e-10	NA	2.54169554675764e-10	1.60610512592819e-23	0.323	NA	0.448	0.439	0.0877613	GO:0016082	synaptic vesicle priming	4/339	20/18866	0.000395171	0.0304925	0.0272218	STX1B/STX1A/SV2A/VAMP1	4										R-HSA-5619107	Defective TPR may confer susceptibility towards thyroid papillary carcinoma (TPC)	4/225	31/10704	0.00383053	0.0739333	0.0631741	SEH1L/NUP50/POM121/NUP58	4
MPP1	3	1	0	1	1	0.116826573536899	NA	0.121073333555902	0.110627955677061	7.92644553535657e-10	NA	4.44490355627612e-12	1.38212813021126e-16	0.444	NA	0.473	0.443	0.087132	GO:0019886	antigen processing and presentation of exogenous peptide antigen via MHC class II	8/339	99/18866	0.000414416	0.0312508	0.0278987	KIFAP3/ACTR10/DYNC1H1/AP2S1/CLTC/KLC1/ACTR1B/SEC23A	8										R-HSA-162906	HIV Infection	12/225	234/10704	0.00390056	0.0739333	0.0631741	SEH1L/POLR2H/PPIA/PSMD12/PSMD7/TSG101/AP2S1/BTRC/NUP50/PSMD13/POM121/NUP58	12
SFXN1	3	1	0	1	1	0.104325973948912	NA	0.114584750910699	0.128192967670606	2.73944122446604e-09	NA	3.98658176738769e-12	1.11667608322459e-18	0.393	NA	0.51	0.425	0.0867759	GO:0006090	pyruvate metabolic process	10/339	152/18866	0.000433056	0.0319307	0.0285057	SEH1L/PGM2L1/HK1/GPI/PDHA1/ME3/NUP50/POM121/NUP58/PGAM1	10										R-HSA-1428517	The citric acid (TCA) cycle and respiratory electron transport	10/225	176/10704	0.00401276	0.0743699	0.0635472	NDUFAF4/SUCLA2/IDH3A/ATP5PD/NDUFB11/PDHA1/ME3/NDUFB10/MDH2/NDUFA8	10
UBL4A	3	1	0	1	1	0.116938748823639	NA	0.100162382477552	0.129866017601866	1.63710427136841e-09	NA	8.44563138936652e-10	1.28299119785891e-19	0.47	NA	0.467	0.476	0.0867418	GO:0051452	intracellular pH reduction	6/339	55/18866	0.000444774	0.0320817	0.0286406	ATP6V0E2/ATP6V1C1/ATP6V1A/ATP6V0C/ATP6V0A1/DMXL2	6										R-HSA-1660516	Synthesis of PIPs at the early endosome membrane	3/225	16/10704	0.00419183	0.0745301	0.0636841	INPP5F/INPP4A/MTMR4	3
MYADM	3	1	0	1	1	0.115236293427109	NA	0.118507198848415	0.112645309787399	1.57252312843764e-12	NA	6.15601716630568e-11	2.0646211987578e-18	0.329	NA	0.415	0.36	0.0865972	GO:0051031	tRNA transport	5/339	37/18866	0.000494324	0.0342803	0.0306033	SEH1L/NUP50/XPOT/POM121/NUP58	5										R-HSA-3928665	EPH-ephrin mediated repulsion of cells	5/225	51/10704	0.00420014	0.0745301	0.0636841	EPHB6/DNM1/AP2S1/CLTC/EPHA5	5
LINC00294	3	1	0	1	1	0.102728234715046	NA	0.106037078956813	0.135715172561173	3.1134214491522e-09	NA	2.02725616398795e-09	5.94917009607133e-23	0.314	NA	0.392	0.4	0.0861201	GO:0016197	endosomal transport	13/339	244/18866	0.000495918	0.0342803	0.0306033	RAB6A/BLOC1S2/ACTN2/PREPL/INPP5F/TSG101/CLTC/REPS2/SNX27/SLC66A2/TBC1D17/VPS26A/GGA3	13										R-HSA-5619102	SLC transporter disorders	7/225	98/10704	0.00452811	0.0779421	0.0665996	SEH1L/SLC9A6/HK1/NUP50/SLC27A4/POM121/NUP58	7
ACTR6	3	1	0	1	1	0.107052273612348	NA	0.100445750126832	0.136049730695365	2.08973844568497e-12	NA	2.97089774296169e-10	1.60041492497136e-22	0.288	NA	0.351	0.362	0.0858869	GO:0002495	antigen processing and presentation of peptide antigen via MHC class II	8/339	103/18866	0.000541015	0.036104	0.0322314	KIFAP3/ACTR10/DYNC1H1/AP2S1/CLTC/KLC1/ACTR1B/SEC23A	8										R-HSA-168274	Export of Viral Ribonucleoproteins from Nucleus	4/225	33/10704	0.00482125	0.0779421	0.0665996	SEH1L/NUP50/POM121/NUP58	4
EFTUD2	3	1	0	1	1	0.112338505930014	NA	0.129980013023191	0.100444167917146	3.94239400460654e-08	NA	2.92116761622724e-11	2.38437813566756e-15	0.382	NA	0.498	0.48	0.0856907	GO:1900034	regulation of cellular response to heat	7/339	79/18866	0.000544063	0.036104	0.0322314	SEH1L/GSK3B/NUP50/HSF1/POM121/NUP58/BAG4	7										R-HSA-180746	Nuclear import of Rev protein	4/225	33/10704	0.00482125	0.0779421	0.0665996	SEH1L/NUP50/POM121/NUP58	4
ABCB6	3	0	1	1	1	NA	0.112064511576921	0.117168623300494	0.112395394337609	NA	4.53044314514605e-10	2.01493271106204e-10	4.28305602155932e-16	NA	0.295	0.382	0.378	0.0854071	GO:0097064	ncRNA export from nucleus	5/339	38/18866	0.00056093	0.0364934	0.0325791	SEH1L/NUP50/XPOT/POM121/NUP58	5										R-HSA-180910	Vpr-mediated nuclear import of PICs	4/225	33/10704	0.00482125	0.0779421	0.0665996	SEH1L/NUP50/POM121/NUP58	4
NBDY	3	0	1	1	1	NA	0.104714028318049	0.109712593289371	0.126869550209328	NA	3.58670699488594e-09	6.0492203767252e-11	1.83452804232353e-23	NA	0.351	0.463	0.495	0.085324	GO:0002504	antigen processing and presentation of peptide or polysaccharide antigen via MHC class II	8/339	104/18866	0.00057711	0.0368241	0.0328743	KIFAP3/ACTR10/DYNC1H1/AP2S1/CLTC/KLC1/ACTR1B/SEC23A	8										R-HSA-2995410	Nuclear Envelope (NE) Reassembly	6/225	75/10704	0.0048597	0.0779421	0.0665996	SEH1L/TUBA4A/PPP2R2A/SUMO1/POM121/NUP58	6
GLRX	3	1	0	1	1	0.104798679653117	NA	0.12933694703256	0.10690702115137	1.65791294792527e-10	NA	8.83168501877256e-15	1.5089441840213e-17	0.361	NA	0.371	0.454	0.0852607	GO:0045851	pH reduction	6/339	58/18866	0.000593632	0.0371636	0.0331774	ATP6V0E2/ATP6V1C1/ATP6V1A/ATP6V0C/ATP6V0A1/DMXL2	6										R-HSA-159227	Transport of the SLBP independent Mature mRNA	4/225	34/10704	0.00537553	0.0815126	0.0696504	SEH1L/NUP50/POM121/NUP58	4
ENY2	3	1	0	1	1	0.12182679416929	NA	0.104611987161783	0.114066401726667	3.89119646814325e-10	NA	2.89493017918312e-09	1.51170806449221e-17	0.468	NA	0.552	0.47	0.0851263	GO:1902600	proton transmembrane transport	10/339	159/18866	0.000616849	0.037902	0.0338365	ATP6V0E2/ATP6V1C1/SLC9A6/ATP5PD/ATP6V1A/ATP6V0C/ATP6V0A1/STOML2/VPS9D1/DNAJC30	10										R-HSA-165054	Rev-mediated nuclear export of HIV RNA	4/225	34/10704	0.00537553	0.0815126	0.0696504	SEH1L/NUP50/POM121/NUP58	4
ATP6V1C1	3	1	0	1	1	0.110284529888869	NA	0.112354032039895	0.113713933437035	2.81901856118064e-06	NA	3.06891821183039e-05	8.73515901369649e-12	0.701	NA	0.763	0.851	0.0840881	GO:0006778	porphyrin-containing compound metabolic process	5/339	39/18866	0.000634051	0.0382506	0.0341478	SUCLA2/ABCB6/PGRMC1/SLC25A38/EIF2AK1	5										R-HSA-70263	Gluconeogenesis	4/225	34/10704	0.00537553	0.0815126	0.0696504	GOT1/GPI/MDH2/PGAM1	4
ZNHIT3	3	1	0	1	1	0.106649815483331	NA	0.119756228283702	0.109004411095051	2.94727319636384e-09	NA	1.50187790465852e-11	2.8221907691941e-15	0.468	NA	0.525	0.459	0.0838526	GO:0017157	regulation of exocytosis	12/339	222/18866	0.00071263	0.0422234	0.0376944	STX1B/STX1A/SYN1/RALB/SYP/RAB27B/PREPL/GSK3B/STXBP5L/VAMP1/TSG101/PFN2	12										R-HSA-71406	Pyruvate metabolism and Citric Acid (TCA) cycle	5/225	55/10704	0.0058135	0.082995	0.0709171	SUCLA2/IDH3A/PDHA1/ME3/MDH2	5
POLR2H	3	1	0	1	1	0.11342044423541	NA	0.110736905733946	0.109502399138703	4.08243673170672e-09	NA	2.32037219551358e-09	2.82101682750983e-15	0.444	NA	0.432	0.431	0.0834149	GO:0006734	NADH metabolic process	5/339	41/18866	0.000801432	0.046055	0.041115	PGM2L1/HK1/GPI/MDH2/PGAM1	5										R-HSA-9639288	Amino acids regulate mTORC1	5/225	55/10704	0.0058135	0.082995	0.0709171	ATP6V0E2/SEH1L/ATP6V1C1/ATP6V1A/ATP6V0C	5
ARFGEF2	3	1	0	1	1	0.112211495004696	NA	0.103715235787133	0.116058216846301	3.30599710403991e-09	NA	6.89648003842628e-10	1.0471795374607e-16	0.368	NA	0.444	0.316	0.0829962	GO:0032386	regulation of intracellular transport	16/339	358/18866	0.000806778	0.046055	0.041115	OAZ1/SAE1/ACTN2/HPCA/GDI1/GSK3B/INPP5F/REEP1/DYNC1H1/ITGB1BP1/BCAS3/DNAJC30/NUP58/DHX9/SCFD1/BAG4	16										R-HSA-74752	Signaling by Insulin receptor	6/225	78/10704	0.00588589	0.082995	0.0709171	KRAS/ATP6V0E2/ATP6V1C1/ATP6V1A/ATP6V0C/ATP6V0A1	6
ZNF385B	3	1	0	1	1	0.100266083958774	NA	0.107275871526245	0.122790557387006	1.20520669304699e-12	NA	8.66874509791591e-12	3.06895757611374e-27	0.252	NA	0.232	0.236	0.0825831	GO:0034629	cellular protein-containing complex localization	4/339	24/18866	0.00081894	0.046055	0.041115	SEH1L/KLHL21/RALB/DLG1	4										R-HSA-159230	Transport of the SLBP Dependant Mature mRNA	4/225	35/10704	0.00597086	0.082995	0.0709171	SEH1L/NUP50/POM121/NUP58	4
CENPV	3	1	0	1	1	0.122544486733833	NA	0.105962059584397	0.10088822386622	1.65654088153447e-14	NA	3.24412898970411e-10	2.05193646979931e-17	0.321	NA	0.409	0.36	0.0823487	GO:1903008	organelle disassembly	8/339	111/18866	0.000887903	0.0491011	0.0438344	VPS13D/CDC37/ATG9A/KLC1/MCTS1/GABARAPL1/RNF41/MTIF3	8										R-HSA-3301854	Nuclear Pore Complex (NPC) Disassembly	4/225	35/10704	0.00597086	0.082995	0.0709171	SEH1L/NUP50/POM121/NUP58	4
RGS2	3	0	1	1	1	NA	0.105954263226612	0.101401711531535	0.121657252264998	NA	1.45283496458786e-10	2.70831042433888e-11	2.29455491840338e-19	NA	0.257	0.266	0.391	0.0822533	GO:0006836	neurotransmitter transport	12/339	229/18866	0.000934268	0.0508181	0.0453672	SLC6A15/STX1B/STX1A/SYN1/SYP/PREPL/GSK3B/STXBP5L/SV2A/VAMP1/KCNC4/PFN2	12										R-HSA-176033	Interactions of Vpr with host cellular proteins	4/225	36/10704	0.00660851	0.0880068	0.0751996	SEH1L/NUP50/POM121/NUP58	4
IGBP1	3	1	0	1	1	0.10864991472568	NA	0.104372211427469	0.112304679581849	1.06354939072766e-09	NA	9.43999018971193e-11	1.44177116447315e-17	0.361	NA	0.407	0.448	0.0813317	GO:0051453	regulation of intracellular pH	7/339	87/18866	0.000970758	0.0510133	0.0455415	ATP6V0E2/ATP6V1C1/SLC9A6/ATP6V1A/ATP6V0C/ATP6V0A1/DMXL2	7										R-HSA-177243	Interactions of Rev with host cellular proteins	4/225	36/10704	0.00660851	0.0880068	0.0751996	SEH1L/NUP50/POM121/NUP58	4
MARK1	3	1	1	0	1	0.108255290355276	0.112606858468575	NA	0.102972851114688	3.95684033276303e-10	1.90242377017022e-10	NA	5.49662881831656e-15	0.28	0.265	NA	0.304	0.0809587	GO:0032984	protein-containing complex disassembly	15/339	330/18866	0.000983981	0.0510133	0.0455415	TECPR1/CFL1/ACTN2/GSK3B/MRPL37/SPTAN1/MRPL15/TSG101/KLC1/GABARAPL1/MRPS11/MRPL27/MRPS18C/MRPL4/SNX14	15										R-HSA-438064	Post NMDA receptor activation events	6/225	80/10704	0.00665251	0.0880068	0.0751996	KRAS/ACTN2/PRKAR1B/TUBA4A/DLG1/PRKAR1A	6
KLHL21	3	0	1	1	1	NA	0.12082892752932	0.101035400028297	0.100451579304743	NA	1.16450301054521e-09	5.54965719667066e-09	2.69635287577181e-11	NA	0.425	0.463	0.534	0.080579	GO:0071375	cellular response to peptide hormone stimulus	15/339	330/18866	0.000983981	0.0510133	0.0455415	ATP6V0E2/ATP6V1C1/ACTN2/PRKAR1B/GOT1/GSK3B/PRKCZ/PID1/ATP6V1A/ATP6V0C/ATP6V0A1/HSF1/STAT6/STAT1/PRKAR1A	15										R-HSA-6784531	tRNA processing in the nucleus	5/225	57/10704	0.00676507	0.0880068	0.0751996	SEH1L/NUP50/XPOT/POM121/NUP58	5
USP19	3	0	1	1	1	NA	0.100071893323546	0.112962502831057	0.10124491532414	NA	2.8378283380479e-09	8.7872543671243e-09	1.3434337998676e-17	NA	0.25	0.33	0.31	0.0785698	GO:0030004	cellular monovalent inorganic cation homeostasis	8/339	114/18866	0.00105667	0.0539391	0.0481535	ATP1B1/ATP6V0E2/ATP6V1C1/SLC9A6/ATP6V1A/ATP6V0C/ATP6V0A1/DMXL2	8										R-HSA-8964038	LDL clearance	3/225	19/10704	0.00692465	0.0880068	0.0751996	AP2S1/CLTC/NCEH1	3
RBM10	3	0	1	1	1	NA	0.105790762679543	0.102408956754392	0.101901945571166	NA	1.98904203285993e-09	3.20208514577775e-09	2.06751955055361e-11	NA	0.384	0.492	0.535	0.0775254	GO:0008625	extrinsic apoptotic signaling pathway via death domain receptors	7/339	89/18866	0.00111034	0.0553809	0.0494407	BLOC1S2/BCL2L1/GSK3B/BEX3/FAIM2/MOAP1/DEDD2	7										R-HSA-8856688	Golgi-to-ER retrograde transport	8/225	133/10704	0.00696457	0.0880068	0.0751996	KIFAP3/RAB6A/ACTR10/TUBA4A/KIF21A/DYNC1H1/KLC1/NAPG	8
TPGS1	3	1	0	1	1	0.100953204148649	NA	0.103120915319232	0.100645476598798	1.20010339671551e-10	NA	9.57219836338039e-11	5.39474756614974e-18	0.342	NA	0.402	0.36	0.0761799	GO:0006096	glycolytic process	8/339	115/18866	0.0011183	0.0553809	0.0494407	SEH1L/PGM2L1/HK1/GPI/NUP50/POM121/NUP58/PGAM1	8										R-HSA-186797	Signaling by PDGF	5/225	58/10704	0.00727953	0.0892813	0.0762886	KRAS/COL6A1/STAT6/STAT1/RASA1	5
PCP4	2	1	0	0	1	0.241013676109611	NA	NA	0.404677297867152	2.70366412073249e-37	NA	NA	2.09789279482897e-122	0.442	NA	NA	0.61	0.161423	GO:0043547	positive regulation of GTPase activity	17/339	406/18866	0.00114658	0.0558634	0.0498714	SMAP1/SGSM1/RGS2/IQSEC1/GDI1/GSK3B/RABGAP1L/STXBP5L/RAP1GAP/ARRB1/ARHGDIG/AFDN/BCAS3/VPS9D1/RASA1/TBC1D17/SEC23A	17										R-HSA-917937	Iron uptake and transport	5/225	58/10704	0.00727953	0.0892813	0.0762886	ATP6V0E2/ATP6V1C1/ATP6V1A/ATP6V0C/ATP6V0A1	5
CD24	2	1	0	0	1	0.113460672283752	NA	NA	0.456761429963279	1.27053012396019e-16	NA	NA	1.25167437004142e-164	0.182	NA	NA	0.626	0.142556	GO:0006757	ATP generation from ADP	8/339	116/18866	0.00118276	0.0558634	0.0498714	SEH1L/PGM2L1/HK1/GPI/NUP50/POM121/NUP58/PGAM1	8										R-HSA-1168372	Downstream signaling events of B Cell Receptor (BCR)	6/225	83/10704	0.00793481	0.0929208	0.0793984	KRAS/PPIA/PSMD12/PSMD7/BTRC/PSMD13	6
STX1A	2	1	0	0	1	0.231862476836318	NA	NA	0.251807727641399	7.83357291745443e-28	NA	NA	8.70163810935764e-48	0.835	NA	NA	0.902	0.120918	GO:0043087	regulation of GTPase activity	19/339	481/18866	0.00119133	0.0558634	0.0498714	SMAP1/SGSM1/RGS2/IQSEC1/GDI1/GSK3B/RABGAP1L/STXBP5L/RAP1GAP/ARRB1/ARHGDIG/ITGB1BP1/AFDN/EPHA5/BCAS3/VPS9D1/RASA1/TBC1D17/SEC23A	19										R-HSA-195253	Degradation of beta-catenin by the destruction complex	6/225	83/10704	0.00793481	0.0929208	0.0793984	TLE5/GSK3B/PSMD12/PSMD7/BTRC/PSMD13	6
ACTN2	2	1	0	0	1	0.173888020360487	NA	NA	0.253362606626864	1.74505783624534e-19	NA	NA	8.40278249567e-59	0.461	NA	NA	0.537	0.106813	GO:0006735	NADH regeneration	4/339	27/18866	0.00129641	0.0558634	0.0498714	PGM2L1/HK1/GPI/PGAM1	4										R-HSA-167044	Signalling to RAS	3/225	20/10704	0.00802194	0.0929208	0.0793984	KRAS/RALB/MAPK11	3
VAT1L	2	1	0	0	1	0.241302774366879	NA	NA	0.176540536073517	4.29431026640364e-36	NA	NA	2.17944116986261e-33	0.378	NA	NA	0.434	0.104461	GO:0006779	porphyrin-containing compound biosynthetic process	4/339	27/18866	0.00129641	0.0558634	0.0498714	SUCLA2/ABCB6/PGRMC1/SLC25A38	4										R-HSA-9671555	Signaling by PDGFR in disease	3/225	20/10704	0.00802194	0.0929208	0.0793984	KRAS/WDR48/STAT1	3
SULT4A1	2	1	0	0	1	0.21634566614403	NA	NA	0.198277006875484	3.27520038677804e-20	NA	NA	4.72471794591489e-31	0.908	NA	NA	0.934	0.103656	GO:0015985	energy coupled proton transport, down electrochemical gradient	4/339	27/18866	0.00129641	0.0558634	0.0498714	ATP5PD/STOML2/VPS9D1/DNAJC30	4										R-HSA-5610783	Degradation of GLI2 by the proteasome	5/225	60/10704	0.00838918	0.0945483	0.0807891	GSK3B/PSMD12/PSMD7/BTRC/PSMD13	5
PCDH10	2	1	0	0	1	0.190747787599499	NA	NA	0.218360831875025	1.46161401831199e-19	NA	NA	2.55607029363288e-45	0.57	NA	NA	0.581	0.102277	GO:0015986	ATP synthesis coupled proton transport	4/339	27/18866	0.00129641	0.0558634	0.0498714	ATP5PD/STOML2/VPS9D1/DNAJC30	4										R-HSA-5610785	GLI3 is processed to GLI3R by the proteasome	5/225	60/10704	0.00838918	0.0945483	0.0807891	GSK3B/PSMD12/PSMD7/BTRC/PSMD13	5
EPHB6	2	1	0	0	1	0.200454949747564	NA	NA	0.208537398924848	2.45775729830581e-18	NA	NA	6.73333345334061e-34	0.805	NA	NA	0.755	0.102248	GO:0033014	tetrapyrrole biosynthetic process	4/339	27/18866	0.00129641	0.0558634	0.0498714	SUCLA2/ABCB6/PGRMC1/SLC25A38	4										R-HSA-442982	Ras activation upon Ca2+ influx through NMDA receptor	3/225	21/10704	0.00921581	0.100479	0.0858567	KRAS/ACTN2/DLG1	3
SSBP3	2	1	0	0	1	0.254159806757566	NA	NA	0.149999540364987	2.45746779934208e-27	NA	NA	8.85621657062901e-19	0.867	NA	NA	0.808	0.10104	GO:0061621	canonical glycolysis	4/339	27/18866	0.00129641	0.0558634	0.0498714	PGM2L1/HK1/GPI/PGAM1	4										R-HSA-5218921	VEGFR2 mediated cell proliferation	3/225	21/10704	0.00921581	0.100479	0.0858567	KRAS/PRKCZ/RASA1	3
SYN1	2	1	0	0	1	0.194018510855812	NA	NA	0.209348191652529	1.09172644806476e-26	NA	NA	6.32989449633879e-46	0.998	NA	NA	0.994	0.100842	GO:0061718	glucose catabolic process to pyruvate	4/339	27/18866	0.00129641	0.0558634	0.0498714	PGM2L1/HK1/GPI/PGAM1	4										R-HSA-983705	Signaling by the B Cell Receptor (BCR)	7/225	112/10704	0.00927684	0.100479	0.0858567	KRAS/PPIA/PSMD12/PSMD7/BTRC/PSMD13/ORAI2	7
PRKAR1B	2	1	0	0	1	0.190179964493431	NA	NA	0.205931841925723	3.52166352792638e-27	NA	NA	2.49233121367228e-50	0.991	NA	NA	0.999	0.099028	GO:0099072	regulation of postsynaptic membrane neurotransmitter receptor levels	6/339	68/18866	0.00138187	0.0587828	0.0524776	STX1B/DNM1/HPCA/PRKCZ/CPT1C/DLG1	6										R-HSA-168276	NS1 Mediated Effects on Host Pathways	4/225	40/10704	0.00960639	0.102715	0.0877669	SEH1L/NUP50/POM121/NUP58	4
PDE1A	2	1	0	0	1	0.201629342061505	NA	NA	0.183098859592517	3.16156982785963e-26	NA	NA	3.43399652097666e-28	0.528	NA	NA	0.661	0.0961821	GO:0090150	establishment of protein localization to membrane	15/339	342/18866	0.00140316	0.0589328	0.0526116	ATP1B1/STX1B/TIMM22/UBL4A/CD24/HPCA/ARL6IP1/PREPL/GDI1/REEP1/MOAP1/ITGB1BP1/AFDN/GOLPH3/GGA3	15										R-HSA-5389840	Mitochondrial translation elongation	6/225	87/10704	0.00990952	0.103307	0.088273	MRPL37/MRPL15/MRPS11/MRPL27/MRPS18C/MRPL4	6
ACTR10	2	0	1	1	0	NA	0.192747912441365	0.191756549923564	NA	NA	1.86593144380576e-14	1.35106963838565e-20	NA	NA	0.623	0.651	NA	0.0961261	GO:0061620	glycolytic process through glucose-6-phosphate	4/339	28/18866	0.00149127	0.0618505	0.0552163	PGM2L1/HK1/GPI/PGAM1	4										R-HSA-5419276	Mitochondrial translation termination	6/225	87/10704	0.00990952	0.103307	0.088273	MRPL37/MRPL15/MRPS11/MRPL27/MRPS18C/MRPL4	6
CEND1	2	1	0	0	1	0.146437534123645	NA	NA	0.237970705596644	6.68582762727403e-14	NA	NA	9.33275904912492e-49	0.951	NA	NA	0.961	0.0961021	GO:0030641	regulation of cellular pH	7/339	94/18866	0.00152863	0.0618535	0.055219	ATP6V0E2/ATP6V1C1/SLC9A6/ATP6V1A/ATP6V0C/ATP6V0A1/DMXL2	7										R-HSA-159231	Transport of Mature mRNA Derived from an Intronless Transcript	4/225	41/10704	0.0104733	0.106521	0.0910195	SEH1L/NUP50/POM121/NUP58	4
GABRA5	2	1	0	0	1	0.246255518933919	NA	NA	0.135553026159778	1.27044989933718e-33	NA	NA	9.23383383065544e-16	0.541	NA	NA	0.767	0.0954521	GO:0098876	vesicle-mediated transport to the plasma membrane	7/339	94/18866	0.00152863	0.0618535	0.055219	STX1B/ARFGEF2/PREPL/SNX27/VPS26A/GOLPH3/GGA3	7										R-HSA-9609736	Assembly and cell surface presentation of NMDA receptors	4/225	41/10704	0.0104733	0.106521	0.0910195	ACTN2/KIF17/TUBA4A/DLG1	4
CPEB3	2	1	0	0	1	0.186645024630239	NA	NA	0.188758323691977	1.33624259617286e-19	NA	NA	1.97540126535305e-31	0.536	NA	NA	0.547	0.0938508	GO:1900542	regulation of purine nucleotide metabolic process	8/339	121/18866	0.00155092	0.0619995	0.0553493	SEH1L/HPCA/PID1/NUP50/POM121/DNAJC30/NUP58/PGAM1	8										R-HSA-159234	Transport of Mature mRNAs Derived from Intronless Transcripts	4/225	42/10704	0.0113892	0.114441	0.0977871	SEH1L/NUP50/POM121/NUP58	4
LINC02607	2	1	0	0	1	0.174356123807992	NA	NA	0.199739901317012	2.09732199857982e-20	NA	NA	1.9517021317181e-34	0.419	NA	NA	0.713	0.093524	GO:0008088	axo-dendritic transport	6/339	70/18866	0.00160659	0.0634602	0.0566533	BLOC1S2/ACTR10/KIF17/RAB27B/DYNC1H1/ARL8A	6										R-HSA-8856828	Clathrin-mediated endocytosis	8/225	146/10704	0.0118952	0.118102	0.100915	DNM1/NECAP1/ARRB1/AP2S1/CLTC/REPS2/SGIP1/FNBP1L	8
DNM1	2	1	0	0	1	0.192657972723753	NA	NA	0.170387744580618	8.44570143567089e-32	NA	NA	1.01037528421561e-38	0.998	NA	NA	1	0.0907614	GO:0090382	phagosome maturation	5/339	48/18866	0.00165297	0.0641569	0.0572753	ATP6V0E2/ATP6V1C1/ATP6V1A/ATP6V0C/ATP6V0A1	5										R-HSA-5658442	Regulation of RAS by GAPs	5/225	68/10704	0.0139986	0.137351	0.117363	KRAS/PSMD12/PSMD7/PSMD13/RASA1	5
DPY19L1	2	1	0	0	1	0.199498062817218	NA	NA	0.160148156508432	2.69646996949015e-30	NA	NA	6.65881234557819e-30	0.353	NA	NA	0.387	0.0899116	GO:0051224	negative regulation of protein transport	9/339	151/18866	0.0016629	0.0641569	0.0572753	SRCIN1/ENY2/RAB11FIP5/GDI1/STXBP5L/ITGB1BP1/PPP1R11/FKBP1B/BAG4	9										R-HSA-5673001	RAF/MAP kinase cascade	12/225	280/10704	0.0152428	0.14782	0.126308	PEBP1/KRAS/ACTN2/BCL2L1/SPTAN1/ARRB1/PSMD12/PSMD7/RASGEF1A/PSMD13/RASA1/DLG1	12
EEF1A2	2	1	0	0	1	0.204815058131777	NA	NA	0.154611094318926	3.18228819433231e-30	NA	NA	2.46067595066491e-29	0.994	NA	NA	0.998	0.0898565	GO:0061615	glycolytic process through fructose-6-phosphate	4/339	29/18866	0.00170564	0.0649047	0.0579429	PGM2L1/HK1/GPI/PGAM1	4										R-HSA-4551638	SUMOylation of chromatin organization proteins	5/225	71/10704	0.0166279	0.158618	0.135535	SEH1L/NUP50/SUMO1/POM121/NUP58	5
HPCA	2	1	0	0	1	0.224754779676595	NA	NA	0.134455322263885	1.41112585020808e-20	NA	NA	2.23281443846546e-14	0.825	NA	NA	0.904	0.0898025	GO:0006140	regulation of nucleotide metabolic process	8/339	123/18866	0.0017214	0.0649047	0.0579429	SEH1L/HPCA/PID1/NUP50/POM121/DNAJC30/NUP58/PGAM1	8										R-HSA-437239	Recycling pathway of L1	4/225	47/10704	0.0167366	0.158618	0.135535	DNM1/TUBA4A/AP2S1/CLTC	4
PGM2L1	2	1	0	0	1	0.170835360796744	NA	NA	0.183140203916749	1.36883862341365e-11	NA	NA	1.46467237826499e-25	0.694	NA	NA	0.85	0.0884939	GO:0046031	ADP metabolic process	8/339	124/18866	0.00181202	0.0675538	0.0603079	SEH1L/PGM2L1/HK1/GPI/NUP50/POM121/NUP58/PGAM1	8										R-HSA-428542	Regulation of commissural axon pathfinding by SLIT and ROBO	2/225	10/10704	0.0177125	0.160632	0.137256	SLIT3/ROBO2	2
KIF17	2	1	0	0	1	0.149922650159692	NA	NA	0.198867797759905	3.69404608976744e-18	NA	NA	7.97260925407782e-49	0.286	NA	NA	0.344	0.0871976	GO:0034605	cellular response to heat	8/339	125/18866	0.00190637	0.0702814	0.0627429	SEH1L/GSK3B/NUP50/HSF1/SUMO1/POM121/NUP58/BAG4	8										R-HSA-9683610	Maturation of nucleoprotein	2/225	10/10704	0.0177125	0.160632	0.137256	GSK3B/SUMO1	2
TLE5	2	1	0	0	1	0.162070691389463	NA	NA	0.186182691559662	1.45614626100473e-20	NA	NA	1.05634937176078e-40	0.992	NA	NA	0.997	0.0870633	GO:1904950	negative regulation of establishment of protein localization	9/339	155/18866	0.00198997	0.0725572	0.0647746	SRCIN1/ENY2/RAB11FIP5/GDI1/STXBP5L/ITGB1BP1/PPP1R11/FKBP1B/BAG4	9										R-HSA-9694631	Maturation of nucleoprotein	2/225	10/10704	0.0177125	0.160632	0.137256	GSK3B/SUMO1	2
PPIA	2	1	0	0	1	0.221170191417905	NA	NA	0.126963860836105	8.08581184411239e-43	NA	NA	2.65540583481995e-29	1	NA	NA	1	0.0870335	GO:0046856	phosphatidylinositol dephosphorylation	4/339	31/18866	0.00219679	0.0792278	0.0707296	INPP5F/MTMR4/INPP5E/PIP4P1	4										R-HSA-5684996	MAPK1/MAPK3 signaling	12/225	286/10704	0.0177196	0.160632	0.137256	PEBP1/KRAS/ACTN2/BCL2L1/SPTAN1/ARRB1/PSMD12/PSMD7/RASGEF1A/PSMD13/RASA1/DLG1	12
GOT1	2	1	0	0	1	0.193677655410773	NA	NA	0.151787651695851	6.16317129824822e-18	NA	NA	6.3651517618056e-18	0.823	NA	NA	0.844	0.0863663	GO:0019081	viral translation	3/339	15/18866	0.0022286	0.0795107	0.0709823	EIF3L/MCTS1/DHX9	3										R-HSA-8939902	Regulation of RUNX2 expression and activity	5/225	73/10704	0.0185518	0.166367	0.142157	GSK3B/PSMD12/PSMD7/PSMD13/STAT1	5
IFITM10	2	1	0	0	1	0.137365932931135	NA	NA	0.207397811492831	1.77823730593163e-16	NA	NA	4.36073979614145e-47	0.321	NA	NA	0.432	0.0861909	GO:0000041	transition metal ion transport	8/339	129/18866	0.00232315	0.0820021	0.0732064	ATP6V0E2/SFXN1/ABCB6/ATP6V1C1/ATP6V1A/ATP6V0C/CLTC/ATP6V0A1	8										R-HSA-75067	Processing of Capped Intronless Pre-mRNA	3/225	28/10704	0.0203884	0.180892	0.154568	LSM11/SNRPB/SNRPF	3
PNMA6A	2	1	0	0	1	0.175549561926563	NA	NA	0.168879140573213	5.41084692000634e-18	NA	NA	2.66656124832403e-32	0.539	NA	NA	0.484	0.0861072	GO:0010821	regulation of mitochondrion organization	10/339	191/18866	0.00245499	0.0857437	0.0765466	VPS13D/SAE1/CDC37/BCL2L1/GSK3B/PID1/MOAP1/RNF41/GOLPH3/BAG4	10										R-HSA-196025	Formation of annular gap junctions	2/225	11/10704	0.021352	0.180957	0.154623	DNM1/CLTC	2
RUNX1T1	2	0	0	1	1	NA	NA	0.194604497022931	0.147422735093316	NA	NA	1.01115382154898e-26	1.0161066526868e-25	NA	NA	0.473	0.345	0.0855068	GO:0010970	transport along microtubule	9/339	161/18866	0.00257484	0.0882846	0.078815	KIFAP3/RAB6A/BLOC1S2/ACTR10/KIF17/RAB27B/PRKCZ/DYNC1H1/ARL8A	9										R-HSA-71288	Creatine metabolism	2/225	11/10704	0.021352	0.180957	0.154623	CKMT1A/CKMT1B	2
ARL6IP1	2	1	0	0	1	0.124943464352201	NA	NA	0.213142494751096	1.96810016726946e-10	NA	NA	1.49532601269614e-41	0.959	NA	NA	0.981	0.0845215	GO:0006885	regulation of pH	7/339	103/18866	0.00258095	0.0882846	0.078815	ATP6V0E2/ATP6V1C1/SLC9A6/ATP6V1A/ATP6V0C/ATP6V0A1/DMXL2	7										R-HSA-9634285	Constitutive Signaling by Overexpressed ERBB2	2/225	11/10704	0.021352	0.180957	0.154623	KRAS/CDC37	2
IQSEC1	2	1	0	0	1	0.177054741156316	NA	NA	0.160654913996234	2.84652218372693e-16	NA	NA	3.74602047635047e-23	0.85	NA	NA	0.887	0.0844274	GO:1903305	regulation of regulated secretory pathway	9/339	162/18866	0.00268435	0.0907133	0.0809832	STX1B/STX1A/SYN1/SYP/PREPL/GSK3B/STXBP5L/VAMP1/PFN2	9										R-HSA-9607240	FLT3 Signaling	12/225	294/10704	0.0214792	0.180957	0.154623	PEBP1/KRAS/ACTN2/BCL2L1/SPTAN1/ARRB1/PSMD12/PSMD7/RASGEF1A/PSMD13/RASA1/DLG1	12
RALB	2	1	0	0	1	0.169000985684105	NA	NA	0.16698629494684	3.48770486369748e-20	NA	NA	1.14141867497968e-29	0.457	NA	NA	0.431	0.0839968	GO:2000651	positive regulation of sodium ion transmembrane transporter activity	3/339	16/18866	0.00270663	0.0907133	0.0809832	ATP1B1/GLRX/DMD	3										R-HSA-350562	Regulation of ornithine decarboxylase (ODC)	4/225	51/10704	0.0219821	0.180957	0.154623	OAZ1/PSMD12/PSMD7/PSMD13	4
SYP	2	1	0	0	1	0.129630467674269	NA	NA	0.203226735604368	1.14426377493119e-13	NA	NA	1.10138924346854e-54	0.994	NA	NA	1	0.0832143	GO:0006754	ATP biosynthetic process	5/339	54/18866	0.00279713	0.0918581	0.0820052	PID1/ATP5PD/STOML2/VPS9D1/DNAJC30	5										R-HSA-6811436	COPI-independent Golgi-to-ER retrograde traffic	4/225	51/10704	0.0219821	0.180957	0.154623	RAB6A/ACTR10/TUBA4A/DYNC1H1	4
SARAF	2	0	0	1	1	NA	NA	0.184409897795836	0.147933158608009	NA	NA	2.73860903523823e-21	1.11832549719077e-24	NA	NA	0.998	0.997	0.0830858	GO:0006165	nucleoside diphosphate phosphorylation	8/339	133/18866	0.00280826	0.0918581	0.0820052	SEH1L/PGM2L1/HK1/GPI/NUP50/POM121/NUP58/PGAM1	8										R-HSA-442742	CREB1 phosphorylation through NMDA receptor-mediated activation of RAS signaling	3/225	29/10704	0.0223961	0.180957	0.154623	KRAS/ACTN2/DLG1	3
CPNE4	2	1	0	1	0	0.153663665615832	NA	0.177287044638556	NA	6.81545047510515e-20	NA	7.69161632386288e-25	NA	0.314	NA	0.303	NA	0.0827377	GO:0018205	peptidyl-lysine modification	16/339	405/18866	0.00284061	0.0918581	0.0820052	SAE1/SEH1L/STX1A/ARRB1/MORF4L1/APBB1/NUP50/WBP2/SUMO1/POM121/ING4/PYGO2/NUP58/DHPS/UBA2/SUPT7L	16										R-HSA-3108214	SUMOylation of DNA damage response and repair proteins	5/225	77/10704	0.022827	0.180957	0.154623	SEH1L/NUP50/SUMO1/POM121/NUP58	5
RAB27B	2	1	0	0	1	0.15007567592228	NA	NA	0.180575582083251	4.19090461806673e-18	NA	NA	8.1513164646265e-37	0.301	NA	NA	0.486	0.0826628	GO:1905475	regulation of protein localization to membrane	10/339	195/18866	0.00285153	0.0918581	0.0820052	STAC2/HPCA/BCL2L1/GDI1/PRKCZ/PID1/CLTC/ITGB1BP1/DPP10/DLG1	10										R-HSA-166520	Signaling by NTRKs	7/225	134/10704	0.0229089	0.180957	0.154623	KRAS/DNM1/RALB/AP2S1/CLTC/DOCK3/MAPK11	7
ADAM11	2	1	0	0	1	0.118607056940866	NA	NA	0.211400746541601	7.83196640433259e-08	NA	NA	7.69814178705299e-43	0.445	NA	NA	0.574	0.082502	GO:0001933	negative regulation of protein phosphorylation	17/339	444/18866	0.00293216	0.0935472	0.0835132	PEBP1/SRCIN1/MYADM/RGS2/IGBP1/PRKAR1B/SH3BP5/INPP5F/PRKCZ/ARRB1/PID1/TSG101/ITGB1BP1/SMPD1/DLG1/DMD/PRKAR1A	17										R-HSA-195721	Signaling by WNT	13/225	332/10704	0.0231224	0.180957	0.154623	RSPO3/KRAS/TLE5/GSK3B/PSMD12/PSMD7/AP2S1/CLTC/BTRC/PSMD13/CTNNBIP1/PYGO2/VPS26A	13
SH3BGRL2	2	1	0	0	1	0.158635843305977	NA	NA	0.158348066806029	1.49321273335392e-14	NA	NA	1.03809589834617e-23	0.517	NA	NA	0.571	0.079246	GO:0051648	vesicle localization	11/339	229/18866	0.00297454	0.0939955	0.0839133	KIFAP3/BLOC1S2/TPGS1/SYN1/DNM1/RAB27B/PRKCZ/DYNC1H1/SCFD1/SEC23A/FNBP1L	11										R-HSA-180534	Vpu mediated degradation of CD4	4/225	52/10704	0.0234332	0.180957	0.154623	PSMD12/PSMD7/BTRC/PSMD13	4
SYNGR1	2	1	0	0	1	0.141451790787541	NA	NA	0.174366497480049	1.75484913916155e-12	NA	NA	4.58484670402803e-24	0.853	NA	NA	0.928	0.0789546	GO:0006414	translational elongation	8/339	135/18866	0.00307871	0.0945849	0.0844396	CPEB3/EEF1A2/MRPL37/MRPL15/MRPS11/MRPL27/MRPS18C/MRPL4	8										R-HSA-2980766	Nuclear Envelope Breakdown	4/225	52/10704	0.0234332	0.180957	0.154623	SEH1L/NUP50/POM121/NUP58	4
ETV1	2	0	0	1	1	NA	NA	0.150605707791981	0.164285907895341	NA	NA	1.12500979881474e-15	2.12351798884362e-32	NA	NA	0.396	0.388	0.0787229	GO:0032543	mitochondrial translation	8/339	135/18866	0.00307871	0.0945849	0.0844396	MRPL37/MRPL15/MRPS11/MRPL27/TRUB2/MRPS18C/MRPL4/MTIF3	8										R-HSA-72165	mRNA Splicing - Minor Pathway	4/225	52/10704	0.0234332	0.180957	0.154623	EFTUD2/POLR2H/SNRPB/SNRPF	4
SH3BP5	2	1	0	0	1	0.151852992380558	NA	NA	0.162566352054268	3.62129050820995e-15	NA	NA	5.73098446811709e-29	0.476	NA	NA	0.537	0.0786048	GO:0046939	nucleotide phosphorylation	8/339	135/18866	0.00307871	0.0945849	0.0844396	SEH1L/PGM2L1/HK1/GPI/NUP50/POM121/NUP58/PGAM1	8										R-HSA-75815	Ubiquitin-dependent degradation of Cyclin D	4/225	52/10704	0.0234332	0.180957	0.154623	GSK3B/PSMD12/PSMD7/PSMD13	4
CDC37	2	1	0	0	1	0.173987773475931	NA	NA	0.140025463031968	7.08700648845116e-14	NA	NA	3.72100872495618e-16	0.705	NA	NA	0.793	0.0785033	GO:0050732	negative regulation of peptidyl-tyrosine phosphorylation	5/339	56/18866	0.00328155	0.0998915	0.089177	SRCIN1/SH3BP5/INPP5F/PRKCZ/TSG101	5										R-HSA-8856825	Cargo recognition for clathrin-mediated endocytosis	6/225	106/10704	0.0241777	0.184885	0.157979	NECAP1/ARRB1/AP2S1/CLTC/REPS2/SGIP1	6
RAB11FIP5	2	1	0	1	0	0.140809777529714	NA	0.172462395165011	NA	1.03013127668511e-12	NA	6.67594825861004e-18	NA	0.429	NA	0.463	NA	0.078318	GO:0030705	cytoskeleton-dependent intracellular transport	10/339	200/18866	0.00341747	0.103083	0.0920265	KIFAP3/RAB6A/BLOC1S2/ACTR10/KIF17/RAB27B/PRKCZ/DYNC1H1/ARL8A/FNBP1L	10										R-HSA-6798695	Neutrophil degranulation	17/225	480/10704	0.0246848	0.184885	0.157979	RAB6A/ACTR10/PPIA/SYNGR1/PGRMC1/SPTAN1/PSMD12/PSMD7/DYNC1H1/GPI/ATP6V0C/ATP6V0A1/PSMD13/NIT2/ACTR1B/PGAM1/ARL8A	17
PREPL	2	1	0	0	1	0.156140863084453	NA	NA	0.156920389007151	1.44960963337638e-15	NA	NA	3.67465481266523e-26	0.992	NA	NA	0.99	0.0782653	GO:0075733	intracellular transport of virus	5/339	57/18866	0.00354513	0.105971	0.0946041	SEH1L/TSG101/NUP50/POM121/NUP58	5										R-HSA-190873	Gap junction degradation	2/225	12/10704	0.025272	0.184885	0.157979	DNM1/CLTC	2
NIPAL3	2	1	0	0	1	0.166817213197545	NA	NA	0.145766582107834	4.50492696675385e-16	NA	NA	2.19280974524884e-27	0.417	NA	NA	0.497	0.0781459	GO:0016311	dephosphorylation	18/339	492/18866	0.00361571	0.10619	0.0948	IGBP1/GSK3B/INPP5F/PPP2R2D/TIPRL/BTRC/PPM1L/INPP4A/IMPA1/PPP2R2A/PPP1R11/MTMR4/SMPD1/FKBP1B/DLG1/INPP5E/BAG4/PIP4P1	18										R-HSA-8866427	VLDLR internalisation and degradation	2/225	12/10704	0.025272	0.184885	0.157979	AP2S1/CLTC	2
PGRMC1	2	1	0	0	1	0.11838504393986	NA	NA	0.191575722984748	1.67462339040252e-08	NA	NA	3.49278712910242e-28	0.861	NA	NA	0.942	0.0774902	GO:0001505	regulation of neurotransmitter levels	11/339	235/18866	0.00362051	0.10619	0.0948	STX1B/STX1A/SYN1/SYP/PREPL/GSK3B/STXBP5L/SV2A/VAMP1/KCNC4/PFN2	11										R-HSA-9673767	Signaling by PDGFRA transmembrane, juxtamembrane and kinase domain mutants	2/225	12/10704	0.025272	0.184885	0.157979	KRAS/STAT1	2
SLC9A6	2	1	0	0	1	0.163564288149212	NA	NA	0.145909724410021	1.62572611990851e-13	NA	NA	5.15746765850854e-17	0.75	NA	NA	0.794	0.0773685	GO:0035304	regulation of protein dephosphorylation	8/339	139/18866	0.00368013	0.10619	0.0948	IGBP1/GSK3B/PPP2R2D/TIPRL/PPP2R2A/PPP1R11/SMPD1/FKBP1B	8										R-HSA-9673770	Signaling by PDGFRA extracellular domain mutants	2/225	12/10704	0.025272	0.184885	0.157979	KRAS/STAT1	2
BCL2L1	2	1	0	0	1	0.147938434384227	NA	NA	0.159435053346364	3.56016099719013e-13	NA	NA	2.44476978116538e-29	0.472	NA	NA	0.535	0.0768434	GO:0006839	mitochondrial transport	12/339	271/18866	0.00379594	0.10619	0.0948	SAE1/TIMM22/BLOC1S2/SFXN1/BCL2L1/GSK3B/ATP5PD/MOAP1/SLC25A38/STOML2/DNAJC30/BAG4	12										R-HSA-162599	Late Phase of HIV Life Cycle	7/225	139/10704	0.0273061	0.195401	0.166965	SEH1L/POLR2H/PPIA/TSG101/NUP50/POM121/NUP58	7
GDI1	2	1	0	0	1	0.105392328547601	NA	NA	0.201064954668643	1.76299429133388e-10	NA	NA	3.42491312843846e-48	0.996	NA	NA	0.999	0.0766143	GO:0055117	regulation of cardiac muscle contraction	6/339	83/18866	0.0038097	0.10619	0.0948	ATP1B1/RGS2/SUMO1/FKBP1B/DLG1/DMD	6										R-HSA-112315	Transmission across Chemical Synapses	11/225	270/10704	0.0273952	0.195401	0.166965	KRAS/STX1A/ACTN2/SYN1/PRKAR1B/GABRA5/KIF17/TUBA4A/AP2S1/DLG1/PRKAR1A	11
TUBA4A	2	1	0	0	1	0.166514883491656	NA	NA	0.136691138148518	3.90070442081141e-13	NA	NA	4.88569952536823e-16	0.853	NA	NA	0.877	0.0758015	GO:0006007	glucose catabolic process	4/339	36/18866	0.00383327	0.10619	0.0948	PGM2L1/HK1/GPI/PGAM1	4										R-HSA-68882	Mitotic Anaphase	10/225	236/10704	0.0274123	0.195401	0.166965	SEH1L/TUBA4A/PSMD12/PSMD7/DYNC1H1/PPP2R2A/SUMO1/PSMD13/POM121/NUP58	10
SLC26A4-AS1	2	1	0	0	1	0.148489385216526	NA	NA	0.152768195491431	7.32692282360939e-16	NA	NA	2.75575360785103e-17	0.492	NA	NA	0.631	0.0753144	GO:0062012	regulation of small molecule metabolic process	17/339	456/18866	0.00383655	0.10619	0.0948	OAZ1/SEH1L/HPCA/GSK3B/PID1/PSMD12/PSMD7/CLTC/NUP50/LPGAT1/SLC27A4/PSMD13/MAEA/POM121/DNAJC30/NUP58/PGAM1	17										R-HSA-2555396	Mitotic Metaphase and Anaphase	10/225	237/10704	0.0281131	0.1955	0.16705	SEH1L/TUBA4A/PSMD12/PSMD7/DYNC1H1/PPP2R2A/SUMO1/PSMD13/POM121/NUP58	10
GSK3B	2	1	0	1	0	0.144298902893938	NA	0.155604460604803	NA	4.25987700210303e-12	NA	3.42027141169633e-15	NA	0.472	NA	0.556	NA	0.0749758	GO:0048268	clathrin coat assembly	3/339	18/18866	0.00384051	0.10619	0.0948	AP2S1/CLTC/SGIP1	3										R-HSA-174113	SCF-beta-TrCP mediated degradation of Emi1	4/225	55/10704	0.0281295	0.1955	0.16705	PSMD12/PSMD7/BTRC/PSMD13	4
RTN2	2	0	0	1	1	NA	NA	0.163623459489832	0.13395711909073	NA	NA	2.16888540126468e-17	6.7379261071332e-21	NA	NA	0.461	0.45	0.0743951	GO:1901524	regulation of mitophagy	3/339	18/18866	0.00384051	0.10619	0.0948	VPS13D/CDC37/RNF41	3										R-HSA-6799198	Complex I biogenesis	4/225	55/10704	0.0281295	0.1955	0.16705	NDUFAF4/NDUFB11/NDUFB10/NDUFA8	4
MRPL37	2	0	1	0	1	NA	0.151203896229093	NA	0.145866004399209	NA	1.79474009271144e-15	NA	8.37887249400863e-26	NA	0.403	NA	0.453	0.0742675	GO:0140029	exocytic process	6/339	84/18866	0.00404217	0.110842	0.0989531	STX1B/STX1A/RALB/SV2A/VAMP1/SCFD1	6										R-HSA-112314	Neurotransmitter receptors and postsynaptic signal transmission	9/225	205/10704	0.0291523	0.200934	0.171693	KRAS/ACTN2/PRKAR1B/GABRA5/KIF17/TUBA4A/AP2S1/DLG1/PRKAR1A	9
IDH3A	2	1	0	1	0	0.113187812000636	NA	0.183636927576449	NA	1.02869328947719e-07	NA	2.14997786282059e-15	NA	0.53	NA	0.631	NA	0.0742062	GO:0098930	axonal transport	5/339	59/18866	0.00411733	0.111486	0.0995282	BLOC1S2/ACTR10/RAB27B/DYNC1H1/ARL8A	5										R-HSA-5140745	WNT5A-dependent internalization of FZD2, FZD5 and ROR2	2/225	13/10704	0.0294591	0.201385	0.172078	AP2S1/CLTC	2
SVOP	2	1	0	0	1	0.133548816980185	NA	NA	0.162107660727841	6.82603002859901e-14	NA	NA	8.51667505160679e-21	0.4	NA	NA	0.677	0.0739141	GO:0007265	Ras protein signal transduction	14/339	346/18866	0.00413286	0.111486	0.0995282	KRAS/CFL1/ARFGEF2/IQSEC1/RALB/GDI1/DHCR24/ARRB1/ARHGDIG/IQSEC3/RASGEF1A/ARHGEF3/RASA1/MAPK11	14										R-HSA-983168	Antigen processing: Ubiquitination & Proteasome degradation	12/225	309/10704	0.0300805	0.203961	0.174279	KLHL21/PSMD12/PSMD7/BTRC/RNF6/RLIM/MKRN1/BTBD1/PSMD13/THOP1/LNPEP/RNF41	12
GBA2	2	1	0	0	1	0.151275615546639	NA	NA	0.144221197197664	6.0702472272321e-14	NA	NA	1.52967755230623e-24	0.459	NA	NA	0.426	0.0738742	GO:0031333	negative regulation of protein-containing complex assembly	8/339	142/18866	0.00418796	0.112062	0.100042	MYADM/GSK3B/SPTAN1/PRKCZ/HSF1/DYRK1A/CTNNBIP1/PFN2	8										R-HSA-8964043	Plasma lipoprotein clearance	3/225	33/10704	0.0314642	0.211622	0.180826	AP2S1/CLTC/NCEH1	3
BTBD10	2	1	0	1	0	0.110051007494406	NA	0.184317593470224	NA	1.17651415348384e-10	NA	1.89032947413216e-17	NA	0.479	NA	0.56	NA	0.0735922	GO:0032092	positive regulation of protein binding	6/339	85/18866	0.00428496	0.112837	0.100734	RALB/GSK3B/ARRB1/CAPRIN2/HSF1/USP33	6										R-HSA-5632684	Hedgehog 'on' state	5/225	85/10704	0.0331756	0.216187	0.184726	ULK3/ARRB1/PSMD12/PSMD7/PSMD13	5
RABGAP1L	2	1	0	0	1	0.164022858968224	NA	NA	0.13028371584635	3.74005256526345e-16	NA	NA	6.72885014610929e-17	0.534	NA	NA	0.551	0.0735766	GO:0072384	organelle transport along microtubule	6/339	85/18866	0.00428496	0.112837	0.100734	KIFAP3/RAB6A/BLOC1S2/ACTR10/PRKCZ/DYNC1H1	6										R-HSA-1855183	Synthesis of IP2, IP, and Ins in the cytosol	2/225	14/10704	0.0339006	0.216187	0.184726	INPP4A/IMPA1	2
TCEAL7	2	1	0	0	1	0.165350923781386	NA	NA	0.128289954190238	3.32168392745069e-19	NA	NA	2.67123227984759e-17	0.476	NA	NA	0.627	0.0734102	GO:0008286	insulin receptor signaling pathway	8/339	143/18866	0.0043687	0.114137	0.101894	ATP6V0E2/ATP6V1C1/GSK3B/PRKCZ/PID1/ATP6V1A/ATP6V0C/ATP6V0A1	8										R-HSA-198323	AKT phosphorylates targets in the cytosol	2/225	14/10704	0.0339006	0.216187	0.184726	GSK3B/MKRN1	2
FARSB	2	1	0	0	1	0.124502112266051	NA	NA	0.167506708100112	4.73028291509219e-13	NA	NA	3.4128411116329e-33	0.408	NA	NA	0.48	0.0730022	GO:0032011	ARF protein signal transduction	3/339	19/18866	0.00450049	0.115757	0.10334	ARFGEF2/IQSEC1/IQSEC3	3										R-HSA-442720	CREB1 phosphorylation through the activation of Adenylate Cyclase	2/225	14/10704	0.0339006	0.216187	0.184726	PRKAR1B/PRKAR1A	2
CRIM1	2	1	0	0	1	0.134477647478388	NA	NA	0.157317927705711	1.33433632996888e-12	NA	NA	1.16966727902098e-24	0.436	NA	NA	0.497	0.0729489	GO:0032012	regulation of ARF protein signal transduction	3/339	19/18866	0.00450049	0.115757	0.10334	ARFGEF2/IQSEC1/IQSEC3	3										R-HSA-877312	Regulation of IFNG signaling	2/225	14/10704	0.0339006	0.216187	0.184726	SUMO1/STAT1	2
SPTAN1	2	1	0	0	1	0.180034350383455	NA	NA	0.111574822650702	4.79832951359771e-23	NA	NA	3.80551785699204e-15	0.991	NA	NA	0.994	0.0729023	GO:0046434	organophosphate catabolic process	8/339	144/18866	0.00455539	0.116267	0.103796	ACOT7/ABHD16A/PDE1A/INPP5F/ENTPD4/IMPA1/SMPD1/INPP5E	8										R-HSA-8849471	PTK6 Regulates RHO GTPases, RAS GTPase and MAP kinases	2/225	14/10704	0.0339006	0.216187	0.184726	KRAS/RASA1	2
ATG9A	2	1	0	1	0	0.153162552320169	NA	0.137961827275986	NA	6.77223628889028e-15	NA	3.61448851482462e-12	NA	0.474	NA	0.544	NA	0.0727811	GO:0015980	energy derivation by oxidation of organic compounds	12/339	278/18866	0.00464499	0.117095	0.104535	SUCLA2/PGM2L1/GSK3B/IDH3A/PID1/COA6/NDUFB11/PDHA1/ME3/NDUFB10/MDH2/NDUFA8	12										R-HSA-187687	Signalling to ERKs	3/225	34/10704	0.0339889	0.216187	0.184726	KRAS/RALB/MAPK11	3
SLIT3	2	0	1	0	1	NA	0.135041723183418	NA	0.15593480162076	NA	1.07361802053776e-19	NA	7.21176228589134e-31	NA	0.243	NA	0.353	0.0727441	GO:0035303	regulation of dephosphorylation	10/339	209/18866	0.0046584	0.117095	0.104535	IGBP1/GSK3B/PPP2R2D/TIPRL/PPP2R2A/PPP1R11/MTMR4/SMPD1/FKBP1B/BAG4	10										R-HSA-187037	Signaling by NTRK1 (TRKA)	6/225	115/10704	0.0342166	0.216187	0.184726	KRAS/DNM1/RALB/AP2S1/CLTC/MAPK11	6
STXBP5L	2	1	0	0	1	0.125538961396366	NA	NA	0.164644990087564	1.35905598802351e-10	NA	NA	1.30081138279639e-28	0.457	NA	NA	0.442	0.072546	GO:0033013	tetrapyrrole metabolic process	5/339	61/18866	0.0047526	0.118038	0.105377	SUCLA2/ABCB6/PGRMC1/SLC25A38/EIF2AK1	5										R-HSA-351202	Metabolism of polyamines	4/225	59/10704	0.0352041	0.217483	0.185833	OAZ1/PSMD12/PSMD7/PSMD13	4
HECA	2	0	1	0	1	NA	0.142710714678598	NA	0.147061474124097	NA	2.91249326939597e-16	NA	2.63858296463749e-30	NA	0.302	NA	0.358	0.072443	GO:0050708	regulation of protein secretion	14/339	352/18866	0.00480085	0.118038	0.105377	SRCIN1/ENY2/STX1A/PPIA/RAB11FIP5/STXBP5L/MYRIP/ARRB1/APBB1/GPI/PPP1R11/EPHA5/FKBP1B/GOLPH3	14										R-HSA-5676590	NIK-->noncanonical NF-kB signaling	4/225	59/10704	0.0352041	0.217483	0.185833	PSMD12/PSMD7/BTRC/PSMD13	4
NECAP1	2	1	0	0	1	0.155396877703112	NA	NA	0.134374042514182	5.91367775212058e-12	NA	NA	6.19668042405939e-16	0.571	NA	NA	0.701	0.0724427	GO:0006890	retrograde vesicle-mediated transport, Golgi to endoplasmic reticulum	6/339	87/18866	0.00480262	0.118038	0.105377	KIFAP3/RAB6A/PITPNB/KLC1/SCFD1/GOLPH3	6										R-HSA-983189	Kinesins	4/225	59/10704	0.0352041	0.217483	0.185833	KIFAP3/TUBA4A/KIF21A/KLC1	4
OPCML	2	0	0	1	1	NA	NA	0.170304193548902	0.119453432754445	NA	NA	2.40144411160376e-15	1.67588990138845e-12	NA	NA	0.77	0.69	0.0724394	GO:0043393	regulation of protein binding	10/339	211/18866	0.00497709	0.121426	0.108402	TLE5/RALB/GSK3B/ARRB1/CAPRIN2/ITGB1BP1/HSF1/BTBD1/CTNNBIP1/USP33	10										R-HSA-5607761	Dectin-1 mediated noncanonical NF-kB signaling	4/225	60/10704	0.0371194	0.225968	0.193084	PSMD12/PSMD7/BTRC/PSMD13	4
RALYL	2	1	0	0	1	0.158766073036291	NA	NA	0.130363354243578	3.96725991393989e-16	NA	NA	1.10190286430139e-20	0.477	NA	NA	0.551	0.0722824	GO:0051222	positive regulation of protein transport	14/339	354/18866	0.00504199	0.122094	0.108998	OAZ1/SAE1/HPCA/PPIA/GSK3B/MYRIP/PRKCZ/ARRB1/TSG101/APBB1/GPI/ITGB1BP1/BCAS3/GOLPH3	14										R-HSA-5610780	Degradation of GLI1 by the proteasome	4/225	60/10704	0.0371194	0.225968	0.193084	PSMD12/PSMD7/BTRC/PSMD13	4
PNMA8A	2	1	0	0	1	0.166551346099986	NA	NA	0.122058019757834	1.63417152039459e-15	NA	NA	1.62943668926786e-13	0.861	NA	NA	0.905	0.0721523	GO:0070125	mitochondrial translational elongation	6/339	88/18866	0.00507803	0.122094	0.108998	MRPL37/MRPL15/MRPS11/MRPL27/MRPS18C/MRPL4	6										R-HSA-5099900	WNT5A-dependent internalization of FZD4	2/225	15/10704	0.0385839	0.22985	0.196401	AP2S1/CLTC	2
BEX3	2	0	0	1	1	NA	NA	0.180002321977076	0.108489942248735	NA	NA	1.35243880050728e-19	5.33931873999634e-15	NA	NA	0.998	0.994	0.0721231	GO:1901215	negative regulation of neuron death	10/339	212/18866	0.00514273	0.12276	0.109592	KRAS/GABRA5/BCL2L1/GSK3B/BTBD10/OXR1/ARRB1/FAIM2/HSF1/RASA1	10										R-HSA-5637810	Constitutive Signaling by EGFRvIII	2/225	15/10704	0.0385839	0.22985	0.196401	KRAS/CDC37	2
INPP5F	2	1	0	0	1	0.164742883956314	NA	NA	0.123592989543892	3.20953883688139e-15	NA	NA	1.46261710891302e-13	0.938	NA	NA	0.905	0.072084	GO:0043666	regulation of phosphoprotein phosphatase activity	7/339	117/18866	0.0052267	0.123873	0.110586	IGBP1/GSK3B/PPP2R2D/TIPRL/PPP2R2A/PPP1R11/FKBP1B	7										R-HSA-5637812	Signaling by EGFRvIII in Cancer	2/225	15/10704	0.0385839	0.22985	0.196401	KRAS/CDC37	2
RAP1GAP	2	1	0	0	1	0.143919072274594	NA	NA	0.144075328651871	1.03348980405067e-10	NA	NA	7.91023511198332e-20	0.823	NA	NA	0.882	0.0719986	GO:0070126	mitochondrial translational termination	6/339	89/18866	0.00536485	0.125356	0.11191	MRPL37/MRPL15/MRPS11/MRPL27/MRPS18C/MRPL4	6										R-HSA-6802948	Signaling by high-kinase activity BRAF mutants	3/225	36/10704	0.0393436	0.232713	0.198847	PEBP1/KRAS/ARRB1	3
MYRIP	2	1	0	1	0	0.152164205889132	NA	0.135580089143326	NA	1.39770462762037e-20	NA	7.85523700095345e-13	NA	0.391	NA	0.469	NA	0.0719361	GO:1901019	regulation of calcium ion transmembrane transporter activity	6/339	89/18866	0.00536485	0.125356	0.11191	ATP1B1/STAC2/HPCA/SUMO1/FKBP1B/DMD	6										R-HSA-162587	HIV Life Cycle	7/225	152/10704	0.0413351	0.241843	0.206649	SEH1L/POLR2H/PPIA/TSG101/NUP50/POM121/NUP58	7
COL6A1	2	0	0	1	1	NA	NA	0.130601097017363	0.156789867940493	NA	NA	2.67549998719019e-13	8.3880128774363e-25	NA	NA	0.463	0.558	0.0718477	GO:0097352	autophagosome maturation	4/339	40/18866	0.00562277	0.130464	0.11647	TECPR1/TSG101/GABARAPL1/SNX14	4										R-HSA-5683057	MAPK family signaling cascades	12/225	325/10704	0.0417472	0.241843	0.206649	PEBP1/KRAS/ACTN2/BCL2L1/SPTAN1/ARRB1/PSMD12/PSMD7/RASGEF1A/PSMD13/RASA1/DLG1	12
HK1	2	1	0	0	1	0.124907629876901	NA	NA	0.161365509746727	1.95593498976261e-10	NA	NA	3.978185622282e-22	0.912	NA	NA	0.929	0.0715683	GO:1901653	cellular response to peptide	15/339	398/18866	0.00582639	0.133444	0.11913	ATP6V0E2/ATP6V1C1/ACTN2/PRKAR1B/GOT1/GSK3B/PRKCZ/PID1/ATP6V1A/ATP6V0C/ATP6V0A1/HSF1/STAT6/STAT1/PRKAR1A	15										R-HSA-111933	Calmodulin induced events	3/225	37/10704	0.0421718	0.241843	0.206649	PRKAR1B/PDE1A/PRKAR1A	3
SV2A	2	1	0	0	1	0.156330190236871	NA	NA	0.126931931361359	8.8903896190362e-12	NA	NA	1.25327344825489e-16	0.934	NA	NA	0.934	0.0708155	GO:0046794	transport of virus	5/339	64/18866	0.00583162	0.133444	0.11913	SEH1L/TSG101/NUP50/POM121/NUP58	5										R-HSA-111997	CaM pathway	3/225	37/10704	0.0421718	0.241843	0.206649	PRKAR1B/PDE1A/PRKAR1A	3
LYNX1	2	0	0	1	1	NA	NA	0.127814705669492	0.155107000932111	NA	NA	8.6075238961205e-08	4.39938673322906e-17	NA	NA	0.813	0.808	0.0707304	GO:1902307	positive regulation of sodium ion transmembrane transport	3/339	21/18866	0.00601557	0.13671	0.122046	ATP1B1/GLRX/DMD	3										R-HSA-983712	Ion channel transport	8/225	186/10704	0.0426537	0.241843	0.206649	ATP1B1/ATP6V0E2/ATP6V1C1/ATP6V1A/ATP6V0C/UNC80/ATP6V0A1/FKBP1B	8
[truncated: 1,116 more rows]

## Sheet: Layer 6_up_DEG
The following spreadsheets are derived from DEGs analysis for layer 1 to layer 6, and white matter. In those spreadsheets, column A indicates gene ID. Column B indicates the number of overlapping genes from four samples. Column G to column J indicates the log fold change of four samples in the same order. Column K to column N indicates the p-value. Column O to column R indicates the proportion of…
[truncated: 203 more rows]

[truncated: 1 more sheets: White Matter_up_DEG]
